# Supplementary material for: Linking Compositional and Functional Predictions to Decipher the Biogeochemical Significance in DFAA Turnover of Abundant Bacterioplankton Lineages in the North Sea
Source: Microorganisms. 2017 Nov 5;5(4):68. doi: 10.3390/microorganisms5040068 (PMC5748577; doi:10.3390/microorganisms5040068)
Supplement: Supplementary file 1 [file microorganisms-05-00068-s001.zip]

Archive with 12 entries (12 files):
- FigureS1.pdf
- FigureS2.pdf
- FigureS3.pdf
- Table_S1.XLS
- Table_S2.XLS
- Table_S3.XLS
- Table_S4.XLS
- Table_S5.XLS
- Table_S6.XLS
- Table_S7.XLS
- Table_S8.XLS
- Table_S9.xls
