# Supplementary material for: Linking Compositional and Functional Predictions to Decipher the Biogeochemical Significance in DFAA Turnover of Abundant Bacterioplankton Lineages in the North Sea
Source: Microorganisms. 2017 Nov 5;5(4):68. doi: 10.3390/microorganisms5040068 (PMC5748577; doi:10.3390/microorganisms5040068)
Supplement: Supplementary file 1 [file microorganisms-05-00068-s001.zip › Table_S1.XLS]

## Sheet: envData
Table S1. Study sites.
Site	Sampling time	Sampling depth	Bottom depth	Latitude	Longitude
	(DD/MM/YYYY)	(m)	(m)	(° N)	(° E)
1	2011-07-15	3	32	54.0893	7.9327
2	2011-07-15	3	21	54.9667	7.6058
3	2011-07-16	3	25	55.4662	7.2852
6	2011-07-16	3	29	56.5018	7.5015
7	2011-07-16	3	32	56.994	7.2925
8	2011-07-17	3	23	57.261	8.732
10	2011-07-17	3	23	57.3173	9.0008
11	2011-07-18	3	24	57.2575	8.7438
12	2011-07-18	3	181	57.4887	7.1
13	2011-07-19	3	384	57.8305	6.9185
14	2011-07-19	4	290	58.1657	5.1693
15	2011-07-20	3	275	58.9985	3.9232
16	2011-07-20	4	119	59.9848	3.036
