# Supplementary material for: Linking Compositional and Functional Predictions to Decipher the Biogeochemical Significance in DFAA Turnover of Abundant Bacterioplankton Lineages in the North Sea
Source: Microorganisms. 2017 Nov 5;5(4):68. doi: 10.3390/microorganisms5040068 (PMC5748577; doi:10.3390/microorganisms5040068)
Supplement: Supplementary file 1 [file microorganisms-05-00068-s001.zip › Table_S2.XLS]

## Sheet: Table_S2
Table S2. Sequence characterists of the 16S rRNA data.
(A)
Sample	Raw sequences	After processing and denoising				After removal of chimeric and non-bacterial (e.g. chloroplast) sequences
		Number of sequences	Average length	Longest sequence	Shortest sequence	Number of sequences	Average length	Longest sequence	Shortest sequence
Entire community
1	20603	15057	514.348	618	276	13652	517.249	618	276
2	35926	11698	521.826	618	290	11348	522.713	618	290
3	29554	21682	508.272	623	294	19847	508.16	623	294
6	19334	14131	501.498	610	274	11453	504.909	610	274
7	12798	9926	512.132	549	279	9216	513.807	549	279
8	25624	14527	507.887	614	280	12870	509.508	612	281
10	10030	5870	457.955	533	277	4439	457.713	533	277
11	19977	14645	506.544	550	285	12610	507.02	550	285
12	17596	12991	513.444	619	279	11973	515.835	619	279
13	19001	13988	500.478	615	280	12864	503.898	615	280
14	14444	10700	501.046	619	280	9631	501.986	619	280
15	16399	12295	506.055	615	281	10913	507.778	615	281
16	20038	13814	486.332	613	278	10901	486.367	613	278
Active community
1	27644	17786	536.256	614	278	16335	538.872	614	278
2	32519	21002	527.24	754	283	6397	522.524	669	283
3	21934	16919	537.633	617	280	12541	538.842	610	280
6	5729	2017	506.458	615	280	1759	515.603	615	280
7	25263	17877	533.533	648	280	13198	534.417	592	286
8	59454	51098	522.092	628	281	28696	518.166	628	281
10	96241	60046	524.774	619	281	30028	518.71	610	282
11	44296	36360	540.659	669	303	18401	542.361	622	303
12	22353	18227	541.763	616	277	12972	548.321	616	277
13	26675	13462	505.673	602	282	9253	508.467	602	282
14	20387	16943	531.462	624	279	13175	532.736	624	279
15	26493	20213	532.012	641	285	14930	535.463	609	286
16	17307	10458	508.972	599	276	6965	508.554	599	284
