# Supplementary material for: Linking Compositional and Functional Predictions to Decipher the Biogeochemical Significance in DFAA Turnover of Abundant Bacterioplankton Lineages in the North Sea
Source: Microorganisms. 2017 Nov 5;5(4):68. doi: 10.3390/microorganisms5040068 (PMC5748577; doi:10.3390/microorganisms5040068)
Supplement: Supplementary file 1 [file microorganisms-05-00068-s001.zip › Table_S3.XLS]

## Sheet: Sheet1
Table S3. Curated OTU table.
OTU Id	Entire community													Active community													Silva taxonomy
	1	2	3	6	7	8	10	11	12	13	14	15	16	1	2	3	6	7	8	10	11	12	13	14	15	16
0	0	0	0	1	0	0	0	0	0	0	0	0	0	0	0	0	0	0	0	0	0	0	0	0	0	0	Bacteria; Acidobacteria; Acidobacteria; Acidobacteriales; Acidobacteriaceae (Subgroup 1); Acidobacterium; uncultured Acidobacteria bacterium
1	0	0	0	1	0	0	0	0	0	0	0	0	0	0	0	0	0	0	0	0	0	0	0	0	0	0	Bacteria; Acidobacteria; Acidobacteria; Acidobacteriales; Acidobacteriaceae (Subgroup 1); Acidobacterium; uncultured bacterium
2	0	0	0	0	0	0	0	0	0	0	0	0	0	0	0	0	0	0	0	0	0	0	0	0	0	0	Bacteria; Acidobacteria; Acidobacteria; Acidobacteriales; Acidobacteriaceae (Subgroup 1); Edaphobacter; uncultured Edaphobacter sp.
3	0	0	0	1	0	0	0	0	0	0	2	0	0	0	0	0	0	0	0	0	0	0	0	0	0	0	Bacteria; Acidobacteria; Acidobacteria; Acidobacteriales; Acidobacteriaceae (Subgroup 1); Granulicella; Granulicella mallensis MP5ACTX8
4	0	0	0	1	0	0	0	0	0	0	0	0	0	0	0	0	0	0	0	0	0	0	0	0	0	0	Bacteria; Acidobacteria; Acidobacteria; Acidobacteriales; Acidobacteriaceae (Subgroup 1); Granulicella; uncultured Acidobacteria bacterium
5	0	0	0	0	0	0	0	0	0	0	0	0	1	0	0	0	0	0	0	0	0	0	0	0	0	0	Bacteria; Acidobacteria; Acidobacteria; Acidobacteriales; Acidobacteriaceae (Subgroup 1); Granulicella; uncultured bacterium
6	0	0	0	0	0	0	0	0	0	0	0	0	0	0	0	0	0	0	0	1	0	0	0	0	0	0	Bacteria; Acidobacteria; Acidobacteria; Acidobacteriales; Acidobacteriaceae (Subgroup 1); uncultured; uncultured bacterium
7	0	0	0	0	0	0	0	0	0	0	0	0	0	0	1	0	0	0	0	0	0	0	0	0	0	0	Bacteria; Acidobacteria; Acidobacteria; Subgroup 3; Unknown Family; Bryobacter; uncultured Acidobacteria bacterium
8	0	0	0	1	0	0	0	0	0	0	0	0	0	0	0	0	0	0	0	0	0	0	0	0	0	0	Bacteria; Acidobacteria; Acidobacteria; Subgroup 3; Unknown Family; Candidatus Solibacter; uncultured bacterium
9	1	0	0	0	0	0	0	0	0	0	0	0	0	0	0	0	0	0	0	0	0	0	0	0	0	0	Bacteria; Acidobacteria; Acidobacteria; Subgroup 6; uncultured bacterium
10	0	0	0	0	0	0	0	1	0	0	0	0	0	0	0	0	0	0	0	0	0	0	0	0	0	0	Bacteria; Acidobacteria; Subgroup 22; uncultured bacterium
11	1	0	0	0	0	0	0	0	0	0	0	0	0	0	0	0	0	0	0	0	0	0	0	0	0	0	Bacteria; Acidobacteria; Subgroup 22; uncultured deep-sea bacterium
12	0	0	0	0	0	0	0	0	0	0	0	0	0	0	1	0	0	0	0	0	0	0	0	0	0	0	Bacteria; Acidobacteria; Subgroup 22; uncultured delta proteobacterium
13	43	18	0	0	0	26	0	0	0	0	0	0	0	0	0	0	0	0	0	0	0	0	0	0	0	0	Bacteria; Actinobacteria; Acidimicrobiia; Acidimicrobiales; Acidimicrobiaceae; uncultured; Ilumatobacter nonamiensis YM16-303
14	0	0	0	0	1	0	0	0	0	0	0	0	0	0	1	0	6	0	0	1	1	0	0	0	0	0	Bacteria; Actinobacteria; Acidimicrobiia; Acidimicrobiales; Acidimicrobiaceae; uncultured; Ilumatobacter nonamiensis YM16-303
15	0	0	0	0	0	1	0	3	0	0	0	0	0	0	0	0	0	0	0	0	0	0	0	0	0	0	Bacteria; Actinobacteria; Acidimicrobiia; Acidimicrobiales; Acidimicrobiaceae; uncultured; Ilumatobacter nonamiensis YM16-303
16	83	7	264	0	0	10	19	90	0	0	0	1	1	11	4	70	2	0	3	11	18	0	0	0	0	0	Bacteria; Actinobacteria; Acidimicrobiia; Acidimicrobiales; Acidimicrobiaceae; uncultured; Ilumatobacter nonamiensis YM16-303
17	94	19	188	3	9	9	0	72	3	0	5	2	1	4	1	26	0	0	0	16	0	0	2	0	4	0	Bacteria; Actinobacteria; Acidimicrobiia; Acidimicrobiales; Acidimicrobiaceae; uncultured; uncultured Acidimicrobidae bacterium
18	0	0	0	0	0	0	0	0	0	0	0	0	0	0	0	0	0	0	0	0	2	0	0	0	0	0	Bacteria; Actinobacteria; Acidimicrobiia; Acidimicrobiales; Acidimicrobiaceae; uncultured; uncultured Acidimicrobidae bacterium
19	0	0	0	0	2	0	0	0	0	0	0	0	0	0	0	0	0	0	0	0	0	0	0	0	0	0	Bacteria; Actinobacteria; Acidimicrobiia; Acidimicrobiales; Acidimicrobiaceae; uncultured; uncultured Acidimicrobidae bacterium
20	0	0	0	0	0	0	0	0	0	0	0	0	0	0	0	0	0	0	0	0	1	0	0	0	0	0	Bacteria; Actinobacteria; Acidimicrobiia; Acidimicrobiales; Acidimicrobiaceae; uncultured; uncultured Acidimicrobidae bacterium
21	0	0	0	0	0	0	0	0	0	0	0	0	0	0	0	0	0	0	0	0	0	0	0	0	1	0	Bacteria; Actinobacteria; Acidimicrobiia; Acidimicrobiales; Acidimicrobiaceae; uncultured; uncultured Acidimicrobidae bacterium
22	0	0	0	0	0	0	0	0	0	0	0	0	0	0	0	1	0	1	0	0	0	0	0	0	0	0	Bacteria; Actinobacteria; Acidimicrobiia; Acidimicrobiales; Acidimicrobiaceae; uncultured; uncultured Acidimicrobidae bacterium
23	54	18	0	2	0	38	23	0	10	1	10	5	4	0	0	0	0	2	1	0	1	0	0	0	0	0	Bacteria; Actinobacteria; Acidimicrobiia; Acidimicrobiales; Acidimicrobiaceae; uncultured; uncultured Acidimicrobidae bacterium
24	0	0	0	0	0	0	0	0	0	1	0	0	0	0	0	0	0	0	0	0	1	0	0	0	0	0	Bacteria; Actinobacteria; Acidimicrobiia; Acidimicrobiales; Acidimicrobiaceae; uncultured; uncultured Acidimicrobidae bacterium
25	0	0	1	0	0	0	0	0	0	0	0	0	0	0	0	0	0	0	0	0	0	0	0	0	0	0	Bacteria; Actinobacteria; Acidimicrobiia; Acidimicrobiales; Acidimicrobiaceae; uncultured; uncultured bacterium
26	0	0	0	0	0	0	0	0	0	0	0	0	0	0	0	0	0	1	0	0	0	0	0	0	0	0	Bacteria; Actinobacteria; Acidimicrobiia; Acidimicrobiales; Acidimicrobiaceae; uncultured; uncultured bacterium
27	0	0	0	0	0	0	0	0	0	0	0	0	0	0	1	0	0	0	0	0	0	0	0	0	0	0	Bacteria; Actinobacteria; Acidimicrobiia; Acidimicrobiales; Acidimicrobiaceae; uncultured; uncultured bacterium
28	0	0	0	0	0	0	0	0	0	0	0	0	0	0	0	0	0	0	0	0	0	0	0	0	1	0	Bacteria; Actinobacteria; Acidimicrobiia; Acidimicrobiales; Acidimicrobiaceae; uncultured; uncultured bacterium
29	0	0	0	0	0	0	0	0	0	0	0	0	0	0	0	0	0	0	0	0	1	0	0	0	0	0	Bacteria; Actinobacteria; Acidimicrobiia; Acidimicrobiales; Acidimicrobiaceae; uncultured; uncultured bacterium
30	6	0	0	90	3	17	12	3	26	49	61	60	93	1	0	0	0	0	0	2	5	10	16	1	6	3	Bacteria; Actinobacteria; Acidimicrobiia; Acidimicrobiales; OM1 clade; Candidatus Actinomarina; uncultured actinobacterium
31	0	0	0	0	0	0	0	1	0	0	0	0	0	1	0	0	0	0	0	0	0	0	1	0	0	0	Bacteria; Actinobacteria; Acidimicrobiia; Acidimicrobiales; OM1 clade; Candidatus Actinomarina; uncultured actinobacterium
32	0	0	0	0	0	0	0	0	0	0	0	0	0	0	0	0	0	0	0	0	0	0	0	1	0	1	Bacteria; Actinobacteria; Acidimicrobiia; Acidimicrobiales; OM1 clade; Candidatus Actinomarina; uncultured bacterium
33	0	0	0	0	0	0	0	0	0	0	0	0	0	0	0	0	0	0	0	0	0	0	0	0	3	0	Bacteria; Actinobacteria; Acidimicrobiia; Acidimicrobiales; OM1 clade; Candidatus Actinomarina; uncultured bacterium
34	0	0	0	0	0	0	0	0	0	0	0	0	0	0	0	0	0	0	0	0	0	0	1	0	0	0	Bacteria; Actinobacteria; Acidimicrobiia; Acidimicrobiales; OM1 clade; Candidatus Actinomarina; uncultured bacterium
35	0	0	0	0	0	0	0	0	0	0	0	0	0	0	0	0	0	0	1	0	0	0	0	0	0	0	Bacteria; Actinobacteria; Acidimicrobiia; Acidimicrobiales; OM1 clade; Candidatus Actinomarina; uncultured bacterium
36	0	0	0	0	0	0	0	0	0	0	0	0	0	0	0	0	0	0	0	0	0	0	1	0	0	0	Bacteria; Actinobacteria; Acidimicrobiia; Acidimicrobiales; OM1 clade; Candidatus Actinomarina; uncultured bacterium
37	0	0	0	23	0	0	0	0	0	1	6	0	25	0	0	0	0	0	0	0	0	4	0	3	1	29	Bacteria; Actinobacteria; Acidimicrobiia; Acidimicrobiales; Sva0996 marine group; uncultured actinobacterium
38	0	0	0	0	0	0	0	0	0	1	1	0	0	0	0	0	0	0	0	0	0	0	0	0	4	0	Bacteria; Actinobacteria; Acidimicrobiia; Acidimicrobiales; Sva0996 marine group; uncultured bacterium
39	0	0	0	0	0	0	0	0	0	0	1	0	0	0	0	0	0	0	0	0	0	0	1	0	0	0	Bacteria; Actinobacteria; Acidimicrobiia; Acidimicrobiales; Sva0996 marine group; uncultured bacterium
40	0	0	0	0	0	0	0	0	0	0	0	0	0	0	0	0	0	0	0	0	1	0	0	0	0	0	Bacteria; Actinobacteria; Acidimicrobiia; Acidimicrobiales; Sva0996 marine group; uncultured bacterium
41	0	0	0	0	0	6	1	4	0	0	6	7	0	0	0	0	0	0	0	1	2	0	0	1	0	0	Bacteria; Actinobacteria; Acidimicrobiia; Acidimicrobiales; Sva0996 marine group; uncultured bacterium
42	0	0	0	0	0	1	0	0	0	0	0	0	0	0	0	0	0	0	0	0	0	0	0	0	0	0	Bacteria; Actinobacteria; Acidimicrobiia; Acidimicrobiales; Sva0996 marine group; uncultured bacterium
43	0	0	0	0	0	0	0	0	0	0	0	1	0	0	0	0	0	0	0	0	0	0	0	0	0	0	Bacteria; Actinobacteria; Acidimicrobiia; Acidimicrobiales; Sva0996 marine group; uncultured marine microorganism
44	0	0	0	0	0	0	0	0	0	2	0	0	0	0	0	0	0	0	0	0	0	0	0	0	0	0	Bacteria; Actinobacteria; Acidimicrobiia; Acidimicrobiales; uncultured; uncultured bacterium
45	0	0	0	0	0	0	0	0	0	0	0	0	0	0	0	0	0	0	0	1	0	0	0	0	0	0	Bacteria; Actinobacteria; Acidimicrobiia; Acidimicrobiales; uncultured; uncultured bacterium
46	0	0	0	0	0	0	0	0	0	0	0	0	0	0	0	0	0	0	0	1	0	0	0	0	0	0	Bacteria; Actinobacteria; Actinobacteria; Frankiales; Nakamurellaceae; Nakamurella; uncultured bacterium
47	0	0	0	0	0	0	0	0	0	0	0	0	0	0	1	0	0	0	0	0	0	0	0	0	0	0	Bacteria; Actinobacteria; Actinobacteria; Frankiales; uncultured; uncultured bacterium
48	0	0	0	0	0	0	0	0	0	0	0	0	0	0	1	0	0	0	0	0	0	0	0	0	0	0	Bacteria; Actinobacteria; Actinobacteria; Micrococcales; Brevibacteriaceae; Brevibacterium; uncultured bacterium
49	0	0	0	11	0	0	0	15	0	18	15	0	4	0	0	0	0	0	0	1	0	0	0	1	1	3	Bacteria; Actinobacteria; Actinobacteria; Micrococcales; Microbacteriaceae; Candidatus Aquiluna; uncultured bacterium
50	0	0	0	0	0	0	0	0	0	0	0	0	0	0	0	0	0	0	0	0	0	0	0	0	0	2	Bacteria; Actinobacteria; Actinobacteria; Micrococcales; Microbacteriaceae; Candidatus Aquiluna; uncultured bacterium
51	0	0	0	0	0	0	1	0	0	0	0	0	0	0	0	0	0	0	0	0	0	0	0	0	0	0	Bacteria; Actinobacteria; Actinobacteria; Micrococcales; Microbacteriaceae; Candidatus Aquiluna; uncultured bacterium
52	0	0	0	0	0	0	0	0	0	0	0	0	0	0	0	0	0	0	0	0	0	1	0	0	0	0	Bacteria; Actinobacteria; Actinobacteria; Micrococcales; Microbacteriaceae; Candidatus Aquiluna; uncultured marine bacterium
53	0	0	0	0	0	0	0	0	0	0	0	0	0	0	0	0	0	0	0	0	0	0	0	0	1	0	Bacteria; Actinobacteria; Actinobacteria; Micrococcales; Microbacteriaceae; Frondihabitans; uncultured bacterium
54	0	0	0	1	0	0	0	0	0	0	0	0	0	0	0	0	0	0	0	0	0	0	0	0	0	0	Bacteria; Actinobacteria; Actinobacteria; Micrococcales; Microbacteriaceae; Gryllotalpicola; Gryllotalpicola koreensis
55	0	0	0	0	0	0	0	0	0	0	0	0	0	0	0	0	0	0	0	0	0	1	0	0	0	0	Bacteria; Actinobacteria; Actinobacteria; Micrococcales; Microbacteriaceae; ML602J-51; uncultured bacterium
56	0	0	0	0	0	0	0	0	0	0	0	0	0	0	0	0	0	1	0	0	0	0	0	0	0	0	Bacteria; Actinobacteria; Actinobacteria; Micrococcales; Microbacteriaceae; uncultured bacterium GRIST22
57	8	0	0	2	0	0	0	0	1	0	3	1	0	0	0	0	0	0	0	0	0	0	0	0	0	0	Bacteria; Actinobacteria; Actinobacteria; Micrococcales; Microbacteriaceae; uncultured bacterium GRIST22
58	0	0	0	0	0	0	0	0	0	0	0	0	0	0	0	0	0	0	0	0	0	0	0	0	1	0	Bacteria; Actinobacteria; Actinobacteria; Micrococcales; Microbacteriaceae; uncultured bacterium GRIST22
59	0	0	0	0	0	0	0	0	0	0	0	0	0	0	0	0	0	1	0	0	0	0	0	0	1	0	Bacteria; Actinobacteria; Actinobacteria; Micrococcales; Microbacteriaceae; uncultured bacterium GRIST22
60	0	0	0	0	0	0	0	0	0	0	0	0	0	0	0	0	0	0	0	0	0	1	0	0	0	0	Bacteria; Actinobacteria; Actinobacteria; Micrococcales; Microbacteriaceae; uncultured bacterium GRIST22
61	0	0	0	0	0	0	0	0	0	0	0	0	0	0	0	0	0	0	0	1	0	0	0	0	0	0	Bacteria; Actinobacteria; Actinobacteria; Micrococcales; Microbacteriaceae; uncultured; uncultured bacterium
62	23	0	0	30	32	5	0	0	18	75	77	50	24	0	0	0	0	1	0	0	0	0	15	4	2	0	Bacteria; Actinobacteria; Actinobacteria; Micrococcales; Micrococcaceae; Arthrobacter; uncultured marine bacterium
63	0	0	0	0	0	0	0	0	0	0	0	0	0	0	0	0	0	0	0	0	0	0	1	0	0	0	Bacteria; Actinobacteria; Actinobacteria; Micrococcales; Micrococcaceae; Arthrobacter; uncultured marine bacterium
64	0	0	0	0	0	0	0	0	0	0	0	0	0	0	0	0	0	0	0	0	0	0	0	0	1	0	Bacteria; Actinobacteria; Actinobacteria; Micrococcales; Micrococcaceae; Arthrobacter; uncultured marine bacterium
65	0	0	0	0	0	0	0	0	0	0	0	1	0	0	0	0	0	0	0	0	0	0	0	0	0	0	Bacteria; Actinobacteria; Actinobacteria; Micrococcales; Micrococcaceae; Arthrobacter; uncultured marine bacterium
66	0	0	0	0	0	0	0	0	0	0	0	0	0	0	0	0	0	0	2	0	0	0	0	0	2	0	Bacteria; Actinobacteria; Actinobacteria; Micrococcales; Micrococcaceae; Arthrobacter; uncultured marine bacterium
67	0	0	0	0	0	0	0	0	0	0	0	0	0	0	1	0	0	0	0	0	0	0	0	0	0	0	Bacteria; Actinobacteria; Actinobacteria; Micrococcales; Micrococcaceae; Micrococcus; uncultured bacterium
68	0	0	0	0	0	0	0	0	0	0	0	0	0	0	0	0	0	0	0	3	0	0	0	0	0	0	Bacteria; Actinobacteria; Actinobacteria; PeM15; uncultured actinobacterium
69	0	0	0	0	0	0	0	0	1	0	0	0	0	0	0	0	0	0	0	0	2	0	0	0	0	0	Bacteria; Actinobacteria; Actinobacteria; PeM15; uncultured actinobacterium
70	1	0	0	1	0	0	0	0	1	0	0	1	0	0	0	0	0	0	0	0	0	0	1	0	0	0	Bacteria; Actinobacteria; Actinobacteria; PeM15; uncultured actinobacterium
71	0	0	0	0	0	0	0	7	0	2	0	4	0	0	0	0	0	0	0	0	0	0	1	0	0	0	Bacteria; Actinobacteria; Actinobacteria; PeM15; uncultured actinobacterium
72	0	0	0	0	0	0	0	0	1	0	2	1	0	0	0	0	0	0	0	0	1	0	0	0	0	0	Bacteria; Actinobacteria; Actinobacteria; PeM15; uncultured Actinomycetales bacterium
73	0	0	0	1	0	1	0	0	0	0	1	0	0	0	0	0	0	0	0	0	0	0	0	0	0	0	Bacteria; Actinobacteria; Actinobacteria; PeM15; uncultured Actinomycetales bacterium
74	0	0	0	0	0	0	0	0	0	0	0	1	0	0	0	0	0	0	0	0	0	0	0	0	0	0	Bacteria; Actinobacteria; Actinobacteria; PeM15; uncultured bacterium
75	0	0	6	0	0	0	0	0	0	0	0	0	0	0	0	0	0	0	0	0	0	0	1	0	0	0	Bacteria; Actinobacteria; Actinobacteria; PeM15; uncultured bacterium
76	0	0	0	0	0	0	0	0	0	0	0	0	0	0	1	0	0	0	0	0	0	0	0	0	0	0	Bacteria; Actinobacteria; Actinobacteria; PeM15; uncultured bacterium
77	0	0	0	0	0	0	0	0	0	0	0	0	0	0	0	0	0	0	0	0	0	0	0	0	0	1	Bacteria; Actinobacteria; Actinobacteria; PeM15; uncultured bacterium
78	0	0	0	0	0	0	0	0	0	0	0	0	0	0	0	0	0	0	0	2	0	0	0	0	0	0	Bacteria; Actinobacteria; Actinobacteria; PeM15; unidentified marine bacterioplankton
79	33	35	76	13	5	27	14	37	5	27	12	16	6	0	0	10	1	0	0	1	1	0	0	0	0	0	Bacteria; Actinobacteria; Actinobacteria; PeM15; unidentified marine bacterioplankton
80	0	0	0	1	0	0	0	0	0	0	0	0	0	0	0	0	0	0	0	0	0	0	0	0	0	0	Bacteria; Actinobacteria; Actinobacteria; Propionibacteriales; Nocardioidaceae; Aeromicrobium; uncultured Aeromicrobium sp.
81	0	0	0	0	0	0	0	0	0	0	0	0	0	0	1	0	0	0	0	0	0	0	0	0	0	0	Bacteria; Actinobacteria; Actinobacteria; Propionibacteriales; Propionibacteriaceae; Friedmanniella; uncultured bacterium
82	1	0	0	0	1	0	0	0	1	2	2	0	0	0	0	0	0	0	0	3	0	0	0	0	0	0	Bacteria; Actinobacteria; Actinobacteria; Propionibacteriales; Propionibacteriaceae; Propionibacterium; uncultured bacterium
83	0	0	0	0	0	0	0	0	0	0	0	0	0	0	0	0	0	0	0	0	1	0	0	0	0	0	Bacteria; Actinobacteria; Actinobacteria; Propionibacteriales; Propionibacteriaceae; uncultured; uncultured Actinomycetales bacterium
84	0	0	0	0	0	0	0	0	0	0	0	0	0	0	1	0	0	0	0	0	0	0	0	0	0	0	Bacteria; Actinobacteria; Actinobacteria; Propionibacteriales; Propionibacteriaceae; uncultured; uncultured bacterium
85	0	1	0	0	0	0	0	0	0	0	0	0	0	0	0	0	0	0	0	0	0	0	0	0	0	0	Bacteria; Actinobacteria; Actinobacteria; Propionibacteriales; Propionibacteriaceae; uncultured; uncultured soil bacterium
86	0	0	4	0	0	0	0	0	0	0	0	0	0	0	1	1	0	0	0	0	0	0	0	0	0	0	Bacteria; Actinobacteria; Actinobacteria; Propionibacteriales; Propionibacteriaceae; uncultured; unidentified marine bacterioplankton
87	0	0	0	0	0	0	0	0	0	0	0	1	0	0	0	0	0	0	0	0	0	0	0	0	0	0	Bacteria; Actinobacteria; Nitriliruptoria; Nitriliruptorales; Nitriliruptoraceae; Nitriliruptor; uncultured bacterium
88	0	0	0	0	0	0	0	0	0	0	0	0	0	1	0	0	0	0	0	0	0	0	0	0	0	0	Bacteria; Actinobacteria; OPB41; uncultured bacterium
89	0	0	0	1	0	0	0	0	0	0	0	0	0	0	0	0	0	0	0	0	0	0	0	0	0	0	Bacteria; Actinobacteria; Thermoleophilia; Solirubrobacterales; 480-2; uncultured bacterium
90	0	0	0	0	0	0	0	0	0	0	0	0	1	0	0	0	0	0	0	0	0	0	0	0	0	0	Bacteria; Actinobacteria; Thermoleophilia; Solirubrobacterales; Conexibacteraceae; Conexibacter; uncultured bacterium
91	0	0	0	1	0	0	0	0	0	0	0	0	0	0	0	0	0	0	0	0	0	0	0	0	0	0	Bacteria; Actinobacteria; Thermoleophilia; Solirubrobacterales; TM146; bacterium enrichment culture clone heteroA49_4W
92	0	0	0	0	0	0	0	0	0	0	0	0	0	1	1	0	0	0	0	0	0	0	0	0	0	0	Bacteria; Bacteroidetes; Bacteroidetes Incertae Sedis; Unknown Order; Unknown Family; Prolixibacter; uncultured bacterium
93	0	0	0	0	0	0	0	0	0	0	0	0	0	0	0	0	0	0	0	1	0	0	0	0	0	0	Bacteria; Bacteroidetes; Bacteroidetes Incertae Sedis; Unknown Order; Unknown Family; Prolixibacter; uncultured bacterium
94	0	0	0	0	0	0	0	0	0	0	0	0	0	0	0	0	0	0	0	2	0	0	0	0	0	0	Bacteria; Bacteroidetes; Bacteroidetes Incertae Sedis; Unknown Order; Unknown Family; Prolixibacter; uncultured bacterium
95	0	0	0	0	0	0	0	0	0	0	0	0	0	0	0	0	0	0	1	0	0	0	0	0	0	0	Bacteria; Bacteroidetes; Bacteroidia; Bacteroidales; Marinilabiaceae; Marinifilum; Bacteroidetes bacterium Ko710
96	0	0	0	0	0	0	0	1	0	0	0	0	0	0	0	0	0	0	0	0	0	0	0	0	0	0	Bacteria; Bacteroidetes; Bacteroidia; Bacteroidales; Marinilabiaceae; Marinifilum; uncultured bacterium
97	0	0	0	0	0	0	0	0	0	0	0	0	0	0	1	0	0	0	0	0	0	0	0	0	0	0	Bacteria; Bacteroidetes; Bacteroidia; Bacteroidales; Marinilabiaceae; uncultured; uncultured bacterium
98	0	0	0	0	0	0	0	0	0	0	0	0	0	0	8	0	0	0	0	0	0	0	0	0	0	0	Bacteria; Bacteroidetes; Bacteroidia; Bacteroidales; Marinilabiaceae; uncultured; uncultured Bacteroidetes bacterium
99	0	0	0	0	0	0	0	0	0	0	0	0	0	0	1	0	0	0	0	0	0	0	0	0	0	0	Bacteria; Bacteroidetes; Bacteroidia; Bacteroidales; Marinilabiaceae; uncultured; uncultured Bacteroidetes bacterium
100	0	0	0	0	0	0	0	0	0	0	0	0	0	0	1	0	0	0	0	0	0	0	0	0	0	0	Bacteria; Bacteroidetes; Bacteroidia; Bacteroidales; Marinilabiaceae; uncultured; uncultured Bacteroidetes bacterium
101	0	0	0	0	0	0	0	0	0	0	0	0	0	0	6	0	0	0	0	0	0	0	0	0	0	0	Bacteria; Bacteroidetes; Bacteroidia; Bacteroidales; Marinilabiaceae; uncultured; uncultured Bacteroidetes bacterium
102	0	0	0	0	0	0	0	0	0	0	0	0	0	0	4	0	0	0	0	0	0	0	0	0	0	0	Bacteria; Bacteroidetes; Bacteroidia; Bacteroidales; Marinilabiaceae; uncultured; uncultured Bacteroidetes bacterium
103	0	0	0	0	0	0	0	1	0	0	0	0	0	0	0	0	0	0	0	0	0	0	0	0	0	0	Bacteria; Bacteroidetes; Bacteroidia; Bacteroidales; Porphyromonadaceae; uncultured; uncultured bacterium
104	0	0	0	0	0	1	0	0	0	0	0	0	0	0	0	0	0	0	0	0	0	0	0	0	0	0	Bacteria; Bacteroidetes; Bacteroidia; Bacteroidales; Prevotellaceae; Alloprevotella; uncultured bacterium
105	0	0	0	0	0	0	0	0	0	0	0	0	0	0	1	0	0	0	0	0	0	0	0	0	0	0	Bacteria; Bacteroidetes; BD2-2; uncultured bacterium
106	0	0	0	0	0	0	0	0	0	0	0	0	0	0	1	0	0	0	0	0	0	0	0	0	0	0	Bacteria; Bacteroidetes; BD2-2; uncultured bacterium
107	0	0	0	0	0	0	0	0	0	0	0	0	0	0	0	0	0	0	0	1	0	0	0	0	0	0	Bacteria; Bacteroidetes; BD2-2; uncultured bacterium
108	0	0	0	0	0	0	0	0	0	0	0	0	0	1	0	0	0	0	0	1	0	0	0	0	0	0	Bacteria; Bacteroidetes; BD2-2; uncultured Bacteroidetes bacterium
109	0	0	0	0	0	0	0	0	0	0	0	0	0	0	0	0	0	0	0	0	1	0	0	0	0	0	Bacteria; Bacteroidetes; BD2-2; uncultured Bacteroidetes bacterium
110	0	0	0	0	0	0	0	0	0	0	0	0	0	0	1	0	0	0	0	0	0	0	0	0	0	0	Bacteria; Bacteroidetes; BD2-2; uncultured Bacteroidetes bacterium
111	1	0	0	0	0	0	0	0	0	0	0	0	0	0	0	0	0	0	0	0	0	0	0	0	0	0	Bacteria; Bacteroidetes; BD2-2; uncultured Bacteroidetes bacterium
112	0	0	0	0	0	0	0	0	0	0	0	0	0	0	0	0	0	0	1	1	0	0	0	0	0	0	Bacteria; Bacteroidetes; BD2-2; uncultured Bacteroidetes bacterium
113	0	0	0	0	0	0	0	1	0	0	0	0	0	0	0	0	0	0	0	0	0	0	0	0	0	0	Bacteria; Bacteroidetes; BD2-2; uncultured organism
114	0	0	0	0	0	0	0	0	0	0	0	0	0	1	0	0	0	0	0	0	0	0	0	0	0	0	Bacteria; Bacteroidetes; BD2-2; uncultured organism
115	0	0	0	0	0	0	0	0	0	0	0	0	0	0	1	0	0	0	0	0	0	0	0	0	0	0	Bacteria; Bacteroidetes; BD2-2; uncultured organism
116	0	0	0	0	0	0	0	0	0	0	0	0	0	1	0	0	0	0	0	0	0	0	0	0	0	0	Bacteria; Bacteroidetes; Cytophagia; Cytophagales; Cytophagaceae; Adhaeribacter; uncultured bacterium
117	0	0	0	0	0	0	0	0	0	0	0	0	0	0	1	0	0	0	0	0	0	0	0	0	0	0	Bacteria; Bacteroidetes; Cytophagia; Cytophagales; Cytophagaceae; Flexibacter; Flexibacter litoralis DSM 6794
118	0	0	0	0	0	0	0	0	0	0	0	0	0	0	1	0	0	0	0	0	0	0	0	0	0	0	Bacteria; Bacteroidetes; Cytophagia; Cytophagales; Cytophagaceae; Hymenobacter; uncultured bacterium
119	0	0	0	0	0	0	0	0	0	0	0	0	0	0	0	0	0	0	0	0	0	0	1	0	0	0	Bacteria; Bacteroidetes; Cytophagia; Cytophagales; Cytophagaceae; Spirosoma; uncultured bacterium
120	0	0	0	0	0	0	0	0	0	0	0	0	0	0	0	0	0	0	0	1	0	0	0	0	0	0	Bacteria; Bacteroidetes; Cytophagia; Cytophagales; Flammeovirgaceae; Ekhidna; uncultured bacterium
121	0	0	0	0	0	0	0	0	0	1	0	0	3	1	1	0	0	1	2	2	0	0	1	0	0	2	Bacteria; Bacteroidetes; Cytophagia; Cytophagales; Flammeovirgaceae; Ekhidna; uncultured bacterium
122	0	0	0	0	0	0	0	0	0	0	0	0	0	0	0	0	0	0	0	1	0	0	0	0	0	0	Bacteria; Bacteroidetes; Cytophagia; Cytophagales; Flammeovirgaceae; Ekhidna; uncultured bacterium
123	0	0	0	0	0	0	0	0	0	0	0	0	0	0	0	0	0	0	0	0	0	0	1	0	0	0	Bacteria; Bacteroidetes; Cytophagia; Cytophagales; Flammeovirgaceae; Ekhidna; uncultured bacterium
124	0	0	0	0	0	0	0	0	0	0	0	0	0	0	3	0	0	0	1	4	0	0	0	0	1	0	Bacteria; Bacteroidetes; Cytophagia; Cytophagales; Flammeovirgaceae; Ekhidna; uncultured bacterium
125	0	0	0	0	0	0	0	0	0	0	0	0	0	0	0	0	0	0	0	0	0	0	0	0	2	0	Bacteria; Bacteroidetes; Cytophagia; Cytophagales; Flammeovirgaceae; Fabibacter; Fabibacter halotolerans
126	0	0	0	0	1	0	0	1	0	5	0	3	0	0	0	0	0	0	0	0	0	2	0	0	2	0	Bacteria; Bacteroidetes; Cytophagia; Cytophagales; Flammeovirgaceae; Fabibacter; uncultured bacterium
127	0	0	0	0	0	0	0	0	0	0	0	0	0	0	0	0	0	0	0	0	0	0	1	0	0	0	Bacteria; Bacteroidetes; Cytophagia; Cytophagales; Flammeovirgaceae; Fabibacter; uncultured Flexibacteraceae bacterium
128	0	0	1	0	0	0	3	2	0	0	0	0	0	1	0	2	0	0	2	13	3	0	0	0	0	0	Bacteria; Bacteroidetes; Cytophagia; Cytophagales; Flammeovirgaceae; Fabibacter; uncultured Flexibacteraceae bacterium
129	0	2	0	0	0	1	0	1	0	0	0	0	0	1	3	1	0	0	1	1	1	0	0	0	0	0	Bacteria; Bacteroidetes; Cytophagia; Cytophagales; Flammeovirgaceae; Flammeovirga; Flammeovirga kamogawensis
130	0	0	0	0	0	0	0	0	0	0	0	0	0	0	1	0	0	0	0	1	0	0	0	0	0	0	Bacteria; Bacteroidetes; Cytophagia; Cytophagales; Flammeovirgaceae; Flammeovirga; Flammeovirga kamogawensis
131	0	0	0	0	0	0	0	0	0	0	0	0	0	2	2	0	0	0	0	0	0	0	0	0	0	0	Bacteria; Bacteroidetes; Cytophagia; Cytophagales; Flammeovirgaceae; Flexithrix; Sphingobacteriales bacterium KIY
132	0	1	4	0	0	2	0	0	0	0	0	0	0	0	0	1	0	0	3	8	0	0	0	0	0	0	Bacteria; Bacteroidetes; Cytophagia; Cytophagales; Flammeovirgaceae; Flexithrix; uncultured bacterium
133	0	0	0	0	0	1	0	0	0	0	0	0	0	0	0	1	0	0	0	0	0	0	0	0	0	0	Bacteria; Bacteroidetes; Cytophagia; Cytophagales; Flammeovirgaceae; Flexithrix; uncultured Bacteroidetes bacterium
134	0	0	0	0	0	0	0	0	1	0	0	0	0	0	0	0	0	0	0	0	0	0	0	0	1	0	Bacteria; Bacteroidetes; Cytophagia; Cytophagales; Flammeovirgaceae; Luteivirga; Marivirga sericea
135	0	0	0	0	0	0	0	0	0	0	0	0	0	0	0	0	0	0	1	0	0	0	0	0	0	0	Bacteria; Bacteroidetes; Cytophagia; Cytophagales; Flammeovirgaceae; Luteivirga; Marivirga sericea
136	0	0	0	0	0	0	0	0	0	0	0	0	0	2	0	0	0	0	0	0	0	0	0	0	0	0	Bacteria; Bacteroidetes; Cytophagia; Cytophagales; Flammeovirgaceae; Marinoscillum; uncultured bacterium
137	0	0	0	0	0	0	0	0	0	0	0	0	0	0	0	0	0	0	0	20	0	0	0	0	0	0	Bacteria; Bacteroidetes; Cytophagia; Cytophagales; Flammeovirgaceae; Marinoscillum; uncultured bacterium
138	0	0	0	0	0	0	0	0	0	0	0	0	0	0	1	0	0	1	1	2	0	0	0	0	0	0	Bacteria; Bacteroidetes; Cytophagia; Cytophagales; Flammeovirgaceae; Marinoscillum; uncultured marine bacterium
139	0	0	0	0	0	0	0	0	0	0	0	0	0	0	0	0	0	0	0	0	0	0	0	0	1	0	Bacteria; Bacteroidetes; Cytophagia; Cytophagales; Flammeovirgaceae; Marinoscillum; uncultured marine bacterium
140	92	855	619	92	59	512	105	272	98	125	46	99	46	61	19	581	24	21	326	668	204	48	62	20	49	21	Bacteria; Bacteroidetes; Cytophagia; Cytophagales; Flammeovirgaceae; Marinoscillum; uncultured marine bacterium
141	0	0	0	0	0	0	0	0	0	0	0	0	0	0	0	0	0	0	0	1	0	0	0	0	0	0	Bacteria; Bacteroidetes; Cytophagia; Cytophagales; Flammeovirgaceae; Marinoscillum; uncultured marine bacterium
142	0	0	0	0	0	0	0	0	0	0	0	0	0	0	0	0	3	0	0	0	0	0	3	0	1	0	Bacteria; Bacteroidetes; Cytophagia; Cytophagales; Flammeovirgaceae; Marinoscillum; uncultured marine bacterium
143	0	0	0	0	0	0	0	0	0	0	0	0	0	0	0	0	0	3	0	0	0	0	0	0	0	0	Bacteria; Bacteroidetes; Cytophagia; Cytophagales; Flammeovirgaceae; Marinoscillum; uncultured marine bacterium
144	0	0	0	0	0	0	0	0	0	0	0	0	0	0	0	0	0	0	0	1	0	0	0	0	0	0	Bacteria; Bacteroidetes; Cytophagia; Cytophagales; Flammeovirgaceae; Marinoscillum; uncultured Marinoscillum sp.
145	0	0	0	0	0	0	0	0	0	0	0	0	0	0	0	0	0	0	1	0	0	0	0	0	0	0	Bacteria; Bacteroidetes; Cytophagia; Cytophagales; Flammeovirgaceae; Marinoscillum; uncultured Marinoscillum sp.
146	0	0	0	0	0	0	0	0	0	0	0	0	0	0	0	0	0	0	0	12	0	0	0	0	0	1	Bacteria; Bacteroidetes; Cytophagia; Cytophagales; Flammeovirgaceae; Marinoscillum; uncultured Marinoscillum sp.
147	0	0	0	0	0	0	0	0	0	0	0	0	0	0	0	0	0	0	0	0	0	0	1	0	0	0	Bacteria; Bacteroidetes; Cytophagia; Cytophagales; Flammeovirgaceae; Marinoscillum; uncultured Marinoscillum sp.
148	0	0	0	0	0	0	0	0	0	0	0	0	0	0	0	0	0	0	0	1	0	0	0	0	0	0	Bacteria; Bacteroidetes; Cytophagia; Cytophagales; Flammeovirgaceae; Marinoscillum; uncultured Marinoscillum sp.
149	0	0	0	0	0	0	0	0	0	0	0	0	0	0	0	1	0	0	0	0	0	0	0	0	0	0	Bacteria; Bacteroidetes; Cytophagia; Cytophagales; Flammeovirgaceae; Marinoscillum; uncultured Marinoscillum sp.
150	0	0	0	0	0	0	0	0	0	0	0	0	0	0	0	0	0	0	0	0	0	0	1	0	0	0	Bacteria; Bacteroidetes; Cytophagia; Cytophagales; Flammeovirgaceae; Rapidithrix; uncultured bacterium
151	0	0	0	0	0	0	0	0	0	0	0	0	0	0	0	0	0	0	0	1	0	0	0	0	0	0	Bacteria; Bacteroidetes; Cytophagia; Cytophagales; Flammeovirgaceae; Reichenbachiella; Bacteroidetes bacterium O-014
152	0	0	0	0	0	0	0	0	0	0	0	0	0	0	0	0	0	0	0	2	0	0	0	0	0	0	Bacteria; Bacteroidetes; Cytophagia; Cytophagales; Flammeovirgaceae; Reichenbachiella; Reichenbachiella agariperforans
153	0	0	0	0	0	0	0	0	0	0	0	0	0	0	0	0	0	0	0	0	1	0	0	0	0	0	Bacteria; Bacteroidetes; Cytophagia; Cytophagales; Flammeovirgaceae; Reichenbachiella; Reichenbachiella agariperforans
154	0	0	0	0	0	1	0	0	0	0	0	0	0	0	0	0	0	0	0	0	0	0	0	0	0	0	Bacteria; Bacteroidetes; Cytophagia; Cytophagales; Flammeovirgaceae; Reichenbachiella; Reichenbachiella agariperforans
155	1	0	0	0	0	0	0	0	0	0	0	0	0	1	2	1	0	0	1	0	0	0	0	0	0	0	Bacteria; Bacteroidetes; Cytophagia; Cytophagales; Flammeovirgaceae; Reichenbachiella; uncultured bacterium
156	0	0	1	0	0	0	0	0	0	0	0	0	0	0	0	0	0	0	0	0	0	0	0	0	0	0	Bacteria; Bacteroidetes; Cytophagia; Cytophagales; Flammeovirgaceae; Reichenbachiella; uncultured bacterium
157	0	0	0	0	0	0	0	0	0	0	0	0	0	0	0	0	0	0	0	1	0	0	0	0	0	0	Bacteria; Bacteroidetes; Cytophagia; Cytophagales; Flammeovirgaceae; Reichenbachiella; uncultured bacterium
158	0	0	0	2	0	0	0	0	0	0	0	0	0	0	0	0	0	1	0	0	0	0	0	0	0	0	Bacteria; Bacteroidetes; Cytophagia; Cytophagales; Flammeovirgaceae; Reichenbachiella; uncultured bacterium
159	6	2	0	0	0	0	0	0	0	0	0	0	0	27	16	1	0	0	3	2	0	0	1	0	0	0	Bacteria; Bacteroidetes; Cytophagia; Cytophagales; Flammeovirgaceae; Reichenbachiella; uncultured bacterium
160	0	0	0	2	0	0	0	0	0	0	0	0	0	0	0	0	0	1	0	0	0	0	0	0	0	0	Bacteria; Bacteroidetes; Cytophagia; Cytophagales; Flammeovirgaceae; Reichenbachiella; uncultured bacterium
161	0	0	0	0	0	0	0	0	0	0	0	0	0	0	0	1	0	0	0	0	0	0	0	0	0	0	Bacteria; Bacteroidetes; Cytophagia; Cytophagales; Flammeovirgaceae; Reichenbachiella; uncultured bacterium
162	0	0	0	57	0	1	0	1	3	0	14	15	50	0	1	0	0	2	2	0	0	2	2	3	3	32	Bacteria; Bacteroidetes; Cytophagia; Cytophagales; Flammeovirgaceae; Reichenbachiella; uncultured bacterium
163	1	0	0	0	0	0	0	0	0	0	0	0	0	0	0	0	0	0	0	0	0	0	0	0	0	0	Bacteria; Bacteroidetes; Cytophagia; Cytophagales; Flammeovirgaceae; Reichenbachiella; uncultured bacterium
164	0	0	0	0	0	0	0	0	0	0	0	0	0	0	0	0	0	0	0	0	0	0	0	2	0	0	Bacteria; Bacteroidetes; Cytophagia; Cytophagales; Flammeovirgaceae; Reichenbachiella; uncultured bacterium
165	1	1	4	0	0	0	0	0	1	4	0	0	0	0	4	0	0	0	0	0	1	0	0	0	0	8	Bacteria; Bacteroidetes; Cytophagia; Cytophagales; Flammeovirgaceae; Reichenbachiella; uncultured bacterium
166	0	0	0	0	0	0	0	0	0	0	0	0	0	0	0	0	0	0	1	3	0	0	1	0	0	0	Bacteria; Bacteroidetes; Cytophagia; Cytophagales; Flammeovirgaceae; Reichenbachiella; uncultured bacterium
167	0	0	1	0	0	0	0	0	0	0	0	0	0	0	0	0	0	0	0	0	0	0	0	0	0	0	Bacteria; Bacteroidetes; Cytophagia; Cytophagales; Flammeovirgaceae; Reichenbachiella; uncultured bacterium
168	0	0	0	0	0	0	0	0	0	0	0	0	0	0	0	0	0	0	0	0	0	0	0	0	2	0	Bacteria; Bacteroidetes; Cytophagia; Cytophagales; Flammeovirgaceae; Reichenbachiella; uncultured bacterium
169	0	0	0	6	0	0	0	1	6	0	1	0	11	0	0	0	0	0	0	0	0	0	1	0	0	0	Bacteria; Bacteroidetes; Cytophagia; Cytophagales; Flammeovirgaceae; Reichenbachiella; uncultured bacterium
170	0	0	0	0	0	0	0	0	0	0	0	0	0	0	0	0	0	0	0	0	1	0	0	0	0	0	Bacteria; Bacteroidetes; Cytophagia; Cytophagales; Flammeovirgaceae; Reichenbachiella; uncultured bacterium
171	0	0	0	0	0	0	0	0	0	0	0	0	0	0	0	0	0	0	0	1	0	0	0	0	0	0	Bacteria; Bacteroidetes; Cytophagia; Cytophagales; Flammeovirgaceae; Reichenbachiella; uncultured Bacteroidetes bacterium
172	0	0	0	0	0	0	0	0	0	0	0	0	0	0	6	0	0	0	6	1	2	0	0	0	0	0	Bacteria; Bacteroidetes; Cytophagia; Cytophagales; Flammeovirgaceae; Reichenbachiella; uncultured Bacteroidetes bacterium
173	0	0	0	0	0	1	0	1	0	0	0	0	0	0	0	0	0	0	0	0	0	0	0	0	0	0	Bacteria; Bacteroidetes; Cytophagia; Cytophagales; Flammeovirgaceae; Reichenbachiella; uncultured Bacteroidetes bacterium
174	0	0	0	0	0	0	0	0	0	0	0	0	0	0	1	0	0	0	0	0	0	0	0	0	0	0	Bacteria; Bacteroidetes; Cytophagia; Cytophagales; Flammeovirgaceae; Reichenbachiella; uncultured Bacteroidetes bacterium
175	3	1	8	0	0	4	1	2	0	0	0	0	0	6	2	6	1	0	16	13	4	0	0	0	0	0	Bacteria; Bacteroidetes; Cytophagia; Cytophagales; Flammeovirgaceae; Reichenbachiella; uncultured Bacteroidetes bacterium
176	0	0	0	0	0	0	0	0	0	0	0	0	0	0	1	0	0	0	0	0	0	0	0	0	0	0	Bacteria; Bacteroidetes; Cytophagia; Cytophagales; Flammeovirgaceae; Reichenbachiella; uncultured Bacteroidetes bacterium
177	0	0	0	0	0	0	1	0	0	0	0	0	0	0	0	0	0	0	0	0	0	0	0	0	0	0	Bacteria; Bacteroidetes; Cytophagia; Cytophagales; Flammeovirgaceae; Reichenbachiella; uncultured Bacteroidetes bacterium
178	0	0	2	0	0	0	0	0	0	0	0	0	0	0	0	0	0	0	0	0	0	1	0	0	0	0	Bacteria; Bacteroidetes; Cytophagia; Cytophagales; Flammeovirgaceae; Reichenbachiella; uncultured Bacteroidetes bacterium
179	0	0	0	0	0	0	0	0	0	0	0	0	0	0	1	0	0	0	0	0	0	0	0	0	0	0	Bacteria; Bacteroidetes; Cytophagia; Cytophagales; Flammeovirgaceae; Reichenbachiella; uncultured Bacteroidetes bacterium
180	0	0	0	0	0	0	0	0	0	0	0	0	0	1	13	0	0	0	0	0	0	0	0	0	0	0	Bacteria; Bacteroidetes; Cytophagia; Cytophagales; Flammeovirgaceae; Reichenbachiella; uncultured Bacteroidetes bacterium
181	0	0	0	0	0	0	0	0	0	0	0	0	0	0	1	0	0	0	0	0	0	0	0	0	0	0	Bacteria; Bacteroidetes; Cytophagia; Cytophagales; Flammeovirgaceae; Reichenbachiella; uncultured Bacteroidetes bacterium
182	0	1	0	0	0	0	0	0	0	0	0	0	0	0	0	0	0	0	0	1	0	0	0	0	0	0	Bacteria; Bacteroidetes; Cytophagia; Cytophagales; Flammeovirgaceae; Reichenbachiella; uncultured Bacteroidetes bacterium
183	0	0	0	0	0	0	0	0	1	0	1	3	1	1	1	0	0	0	1	2	1	1	2	0	0	1	Bacteria; Bacteroidetes; Cytophagia; Cytophagales; Flammeovirgaceae; Reichenbachiella; uncultured Cytophaga sp.
184	0	0	0	0	0	0	1	0	0	0	0	0	0	0	0	0	0	0	0	0	0	0	0	0	0	0	Bacteria; Bacteroidetes; Cytophagia; Cytophagales; Flammeovirgaceae; Reichenbachiella; uncultured Flammeovirgaceae bacterium
185	0	0	0	0	0	0	0	0	0	0	0	0	0	0	0	0	0	0	1	0	0	0	0	0	0	0	Bacteria; Bacteroidetes; Cytophagia; Cytophagales; Flammeovirgaceae; Reichenbachiella; uncultured organism
186	8	0	0	0	0	0	0	0	0	0	0	0	0	13	1	0	0	0	0	0	0	0	0	0	0	0	Bacteria; Bacteroidetes; Cytophagia; Cytophagales; Flammeovirgaceae; Reichenbachiella; uncultured organism
187	0	0	0	0	0	0	0	0	0	0	0	0	1	0	0	0	0	1	1	0	0	0	0	0	0	1	Bacteria; Bacteroidetes; Cytophagia; Cytophagales; Flammeovirgaceae; Reichenbachiella; uncultured organism
188	0	0	0	0	0	2	1	0	0	0	0	0	0	0	0	0	0	0	1	1	2	0	0	0	0	0	Bacteria; Bacteroidetes; Cytophagia; Cytophagales; Flammeovirgaceae; uncultured; uncultured bacterium
189	0	0	0	0	0	0	0	0	0	0	0	0	0	1	1	0	0	0	0	0	0	0	0	0	0	0	Bacteria; Bacteroidetes; Cytophagia; Cytophagales; Flammeovirgaceae; uncultured; uncultured bacterium
190	0	0	0	0	0	0	0	1	0	0	0	0	0	0	0	0	0	0	0	0	0	0	0	0	0	0	Bacteria; Bacteroidetes; Cytophagia; Cytophagales; Flammeovirgaceae; uncultured; uncultured bacterium
191	0	0	0	0	0	0	0	0	0	0	0	0	0	0	0	0	0	0	0	1	0	0	0	0	0	0	Bacteria; Bacteroidetes; Cytophagia; Cytophagales; Flammeovirgaceae; uncultured; uncultured bacterium
192	0	0	0	0	0	0	0	2	0	0	0	0	0	0	0	0	0	0	0	0	0	0	0	0	0	0	Bacteria; Bacteroidetes; Cytophagia; Cytophagales; Flammeovirgaceae; uncultured; uncultured bacterium
193	0	0	0	0	0	0	0	8	0	0	0	0	0	0	0	0	0	0	3	0	0	0	0	0	0	0	Bacteria; Bacteroidetes; Cytophagia; Cytophagales; Flammeovirgaceae; uncultured; uncultured bacterium
194	0	0	0	0	0	0	0	0	0	0	0	0	0	0	0	0	0	0	0	1	0	0	0	0	0	0	Bacteria; Bacteroidetes; Cytophagia; Cytophagales; uncultured bacterium
195	0	0	0	0	0	0	0	0	0	0	0	0	0	0	0	0	0	0	0	0	0	2	0	0	0	0	Bacteria; Bacteroidetes; Cytophagia; Order III; Unknown Family; Balneola; uncultured bacterium
196	0	0	0	0	0	0	0	0	0	0	0	0	0	0	0	0	0	0	0	0	0	0	1	0	0	0	Bacteria; Bacteroidetes; Cytophagia; Order III; Unknown Family; Balneola; uncultured bacterium
197	0	0	0	0	0	0	0	0	0	0	0	0	0	0	0	0	1	0	0	0	0	0	0	0	0	0	Bacteria; Bacteroidetes; Cytophagia; Order III; Unknown Family; Balneola; uncultured bacterium
198	7	3	0	1	0	56	47	0	23	16	20	14	0	2	1	1	1	5	25	0	0	9	33	9	1	0	Bacteria; Bacteroidetes; Cytophagia; Order III; Unknown Family; Balneola; uncultured bacterium
199	0	0	0	0	0	0	0	0	0	0	0	0	0	0	0	0	0	0	0	0	0	0	0	0	1	0	Bacteria; Bacteroidetes; Cytophagia; Order III; Unknown Family; Balneola; uncultured bacterium
200	3	0	0	0	0	0	0	0	0	0	0	4	0	1	0	0	0	10	2	1	0	1	1	0	1	0	Bacteria; Bacteroidetes; Cytophagia; Order III; Unknown Family; Balneola; uncultured bacterium
201	0	0	0	0	0	0	0	0	0	0	0	0	0	0	0	0	0	0	0	0	0	0	1	0	4	0	Bacteria; Bacteroidetes; Cytophagia; Order III; Unknown Family; Balneola; uncultured Bacteroidetes bacterium
202	0	0	0	0	0	2	1	0	0	1	0	0	0	0	0	0	0	0	0	1	0	0	0	0	0	0	Bacteria; Bacteroidetes; Cytophagia; Order III; Unknown Family; Balneola; uncultured Bacteroidetes bacterium
203	0	0	0	0	0	0	0	0	0	0	0	0	0	0	0	0	0	0	0	0	0	0	1	0	0	0	Bacteria; Bacteroidetes; Cytophagia; Order III; Unknown Family; Balneola; uncultured Bacteroidetes bacterium
204	0	0	0	0	0	0	0	0	0	0	0	0	0	0	0	0	0	0	0	0	0	0	1	0	0	0	Bacteria; Bacteroidetes; Cytophagia; Order III; Unknown Family; Balneola; uncultured Bacteroidetes bacterium
205	0	0	0	0	0	0	0	0	0	0	0	0	0	0	0	0	0	0	0	0	0	0	1	0	0	0	Bacteria; Bacteroidetes; Cytophagia; Order III; Unknown Family; Balneola; uncultured Bacteroidetes bacterium
206	0	5	0	0	146	183	0	301	34	511	42	26	0	0	0	0	0	15	171	171	63	0	196	2	4	0	Bacteria; Bacteroidetes; Cytophagia; Order III; Unknown Family; Balneola; uncultured Bacteroidetes bacterium
207	0	0	0	0	0	0	0	0	0	0	0	0	0	0	0	0	0	0	0	0	0	0	1	0	0	0	Bacteria; Bacteroidetes; Cytophagia; Order III; Unknown Family; Balneola; uncultured Bacteroidetes bacterium
208	0	0	0	0	0	0	0	0	0	0	0	0	0	0	0	0	0	0	0	0	0	0	1	0	0	0	Bacteria; Bacteroidetes; Cytophagia; Order III; Unknown Family; Balneola; uncultured Bacteroidetes bacterium
209	0	0	0	0	0	0	0	0	0	0	0	0	0	0	0	0	0	0	0	1	0	0	0	0	0	0	Bacteria; Bacteroidetes; Flavobacteriia; Flavobacteriales; Blattabacteriaceae; pt46; uncultured bacterium
210	0	0	0	0	0	0	0	0	0	0	0	0	0	0	2	0	0	0	0	0	0	0	0	0	0	0	Bacteria; Bacteroidetes; Flavobacteriia; Flavobacteriales; Cryomorphaceae; Brumimicrobium; uncultured bacterium
211	0	0	0	0	0	0	0	0	0	0	0	0	0	1	1	0	0	0	0	0	1	0	0	0	0	0	Bacteria; Bacteroidetes; Flavobacteriia; Flavobacteriales; Cryomorphaceae; Crocinitomix; uncultured bacterium
212	0	0	0	0	0	0	0	0	0	0	0	0	0	0	0	0	0	0	0	2	0	0	0	0	0	0	Bacteria; Bacteroidetes; Flavobacteriia; Flavobacteriales; Cryomorphaceae; Crocinitomix; uncultured bacterium
213	1	0	0	0	0	0	0	0	0	0	0	0	0	0	0	1	0	0	0	1	1	0	0	0	0	0	Bacteria; Bacteroidetes; Flavobacteriia; Flavobacteriales; Cryomorphaceae; Crocinitomix; uncultured bacterium
214	0	0	0	0	0	0	0	0	0	0	0	0	0	0	0	0	0	0	0	1	0	0	0	0	0	0	Bacteria; Bacteroidetes; Flavobacteriia; Flavobacteriales; Cryomorphaceae; Crocinitomix; uncultured bacterium
215	0	0	0	0	0	0	0	0	0	0	0	0	0	1	0	0	0	0	0	0	0	0	0	0	0	0	Bacteria; Bacteroidetes; Flavobacteriia; Flavobacteriales; Cryomorphaceae; Crocinitomix; uncultured bacterium
216	0	0	0	0	0	0	0	0	0	0	0	0	0	0	0	0	0	0	0	1	0	0	0	0	0	0	Bacteria; Bacteroidetes; Flavobacteriia; Flavobacteriales; Cryomorphaceae; Crocinitomix; uncultured bacterium
217	0	0	0	0	0	0	0	0	0	0	0	0	0	0	0	0	0	0	0	0	1	0	0	0	0	0	Bacteria; Bacteroidetes; Flavobacteriia; Flavobacteriales; Cryomorphaceae; Crocinitomix; uncultured bacterium
218	0	0	0	0	0	0	0	4	0	0	0	0	0	0	0	0	0	0	0	0	1	0	0	0	0	0	Bacteria; Bacteroidetes; Flavobacteriia; Flavobacteriales; Cryomorphaceae; Crocinitomix; uncultured bacterium
219	0	0	0	0	0	0	0	0	0	0	0	0	0	0	0	0	0	0	0	3	0	0	0	0	0	0	Bacteria; Bacteroidetes; Flavobacteriia; Flavobacteriales; Cryomorphaceae; Crocinitomix; uncultured bacterium
220	0	0	0	0	0	0	1	0	0	0	0	0	0	0	0	0	0	0	0	0	0	0	0	0	0	0	Bacteria; Bacteroidetes; Flavobacteriia; Flavobacteriales; Cryomorphaceae; Crocinitomix; uncultured bacterium
221	0	0	0	0	0	0	0	0	0	0	0	0	0	0	1	0	0	0	0	0	0	0	0	0	0	0	Bacteria; Bacteroidetes; Flavobacteriia; Flavobacteriales; Cryomorphaceae; Crocinitomix; uncultured bacterium
222	0	0	0	0	0	0	0	0	0	0	0	0	0	1	0	0	0	0	0	0	0	0	0	0	0	0	Bacteria; Bacteroidetes; Flavobacteriia; Flavobacteriales; Cryomorphaceae; Crocinitomix; uncultured Bacteroidetes/Chlorobi group bacterium
223	0	0	0	0	0	0	0	0	0	0	0	0	0	1	0	0	0	0	0	0	0	0	0	0	0	0	Bacteria; Bacteroidetes; Flavobacteriia; Flavobacteriales; Cryomorphaceae; Crocinitomix; uncultured Bacteroidetes/Chlorobi group bacterium
224	0	0	0	0	0	0	0	0	0	0	0	0	0	1	0	0	0	0	0	0	0	0	0	0	0	0	Bacteria; Bacteroidetes; Flavobacteriia; Flavobacteriales; Cryomorphaceae; Crocinitomix; uncultured Bacteroidetes/Chlorobi group bacterium
225	16	0	3	15	0	1	1	4	4	18	0	3	10	3	9	0	0	0	2	2	0	0	2	0	0	9	Bacteria; Bacteroidetes; Flavobacteriia; Flavobacteriales; Cryomorphaceae; Crocinitomix; uncultured Bacteroidetes/Chlorobi group bacterium
226	0	0	0	0	0	0	0	1	0	1	0	0	0	0	2	0	0	0	0	1	0	0	0	0	0	0	Bacteria; Bacteroidetes; Flavobacteriia; Flavobacteriales; Cryomorphaceae; Crocinitomix; uncultured Bacteroidetes/Chlorobi group bacterium
227	2	0	0	1	0	0	0	0	1	0	0	0	0	0	0	0	0	0	0	0	0	0	0	0	0	0	Bacteria; Bacteroidetes; Flavobacteriia; Flavobacteriales; Cryomorphaceae; Crocinitomix; uncultured Bacteroidetes/Chlorobi group bacterium
228	0	0	0	0	0	0	0	0	0	0	0	0	0	1	2	0	0	0	0	1	0	0	0	0	0	0	Bacteria; Bacteroidetes; Flavobacteriia; Flavobacteriales; Cryomorphaceae; Crocinitomix; uncultured Bacteroidetes/Chlorobi group bacterium
229	0	0	0	0	0	0	0	0	0	0	0	0	0	0	1	0	0	0	0	0	0	0	0	0	0	0	Bacteria; Bacteroidetes; Flavobacteriia; Flavobacteriales; Cryomorphaceae; Crocinitomix; uncultured Bacteroidetes/Chlorobi group bacterium
230	0	0	0	0	0	0	0	0	0	0	0	0	0	0	0	0	0	0	0	0	0	0	0	0	1	0	Bacteria; Bacteroidetes; Flavobacteriia; Flavobacteriales; Cryomorphaceae; Crocinitomix; uncultured Bacteroidetes/Chlorobi group bacterium
231	0	0	0	0	0	1	0	0	0	0	0	0	0	0	0	0	0	0	0	0	0	0	0	0	0	0	Bacteria; Bacteroidetes; Flavobacteriia; Flavobacteriales; Cryomorphaceae; Crocinitomix; uncultured Bacteroidetes/Chlorobi group bacterium
232	0	0	0	0	0	0	0	0	0	0	0	0	0	0	0	0	0	0	0	0	0	0	1	0	0	0	Bacteria; Bacteroidetes; Flavobacteriia; Flavobacteriales; Cryomorphaceae; Crocinitomix; uncultured Bacteroidetes/Chlorobi group bacterium
233	0	0	0	0	0	0	0	0	0	0	0	0	0	1	1	0	0	0	0	0	0	0	0	0	0	0	Bacteria; Bacteroidetes; Flavobacteriia; Flavobacteriales; Cryomorphaceae; Crocinitomix; uncultured Bacteroidetes/Chlorobi group bacterium
234	0	2	2	0	0	0	0	0	0	0	0	0	0	0	2	1	0	0	1	3	0	0	0	0	0	0	Bacteria; Bacteroidetes; Flavobacteriia; Flavobacteriales; Cryomorphaceae; Crocinitomix; uncultured Crocinitomix sp.
235	0	0	0	1	0	2	0	0	0	0	0	1	0	0	0	0	0	0	0	0	0	0	0	0	0	0	Bacteria; Bacteroidetes; Flavobacteriia; Flavobacteriales; Cryomorphaceae; Crocinitomix; uncultured Flavobacteriia bacterium
236	0	0	0	0	0	0	0	0	0	0	0	0	0	0	0	0	0	0	1	0	0	0	0	0	0	0	Bacteria; Bacteroidetes; Flavobacteriia; Flavobacteriales; Cryomorphaceae; Crocinitomix; uncultured Flavobacterium sp.
237	0	0	0	0	0	4	12	15	0	0	0	0	0	1	0	0	0	0	0	6	0	0	0	0	0	0	Bacteria; Bacteroidetes; Flavobacteriia; Flavobacteriales; Cryomorphaceae; Fluviicola; marine metagenome
238	0	0	0	1	0	0	0	0	0	0	0	0	0	0	0	0	0	0	0	0	0	0	0	0	1	0	Bacteria; Bacteroidetes; Flavobacteriia; Flavobacteriales; Cryomorphaceae; Fluviicola; marine metagenome
239	0	0	0	0	0	0	0	0	0	0	0	0	0	0	0	0	0	0	0	0	0	0	0	1	8	0	Bacteria; Bacteroidetes; Flavobacteriia; Flavobacteriales; Cryomorphaceae; Fluviicola; marine metagenome
240	0	0	0	0	0	0	0	0	0	0	0	0	0	0	0	0	1	0	0	0	0	0	0	0	0	0	Bacteria; Bacteroidetes; Flavobacteriia; Flavobacteriales; Cryomorphaceae; Fluviicola; uncultured bacterium
241	0	0	0	0	0	0	0	0	0	0	0	0	0	0	0	0	0	0	0	1	0	0	0	0	0	0	Bacteria; Bacteroidetes; Flavobacteriia; Flavobacteriales; Cryomorphaceae; Fluviicola; uncultured bacterium
242	0	0	1	0	0	0	0	0	0	0	0	0	0	2	0	0	0	0	0	0	0	0	0	0	0	0	Bacteria; Bacteroidetes; Flavobacteriia; Flavobacteriales; Cryomorphaceae; Fluviicola; uncultured bacterium
243	0	0	0	0	0	0	0	0	0	0	0	0	0	0	0	0	0	0	0	1	0	0	0	0	0	0	Bacteria; Bacteroidetes; Flavobacteriia; Flavobacteriales; Cryomorphaceae; Fluviicola; uncultured bacterium
244	0	0	0	0	0	0	0	0	0	0	0	0	0	0	0	0	0	0	0	0	0	0	0	0	1	0	Bacteria; Bacteroidetes; Flavobacteriia; Flavobacteriales; Cryomorphaceae; Fluviicola; uncultured bacterium
245	0	0	0	0	0	0	0	0	0	0	0	0	0	0	1	0	0	0	0	0	0	0	0	0	0	0	Bacteria; Bacteroidetes; Flavobacteriia; Flavobacteriales; Cryomorphaceae; Fluviicola; uncultured bacterium
246	0	0	0	0	0	0	0	0	0	0	0	0	0	0	7	0	0	0	0	0	0	0	0	0	0	0	Bacteria; Bacteroidetes; Flavobacteriia; Flavobacteriales; Cryomorphaceae; Fluviicola; uncultured bacterium
247	0	0	0	0	0	0	0	0	0	0	0	0	5	0	0	0	0	0	11	0	0	0	0	0	0	0	Bacteria; Bacteroidetes; Flavobacteriia; Flavobacteriales; Cryomorphaceae; Fluviicola; uncultured bacterium
248	0	0	0	0	0	0	0	0	0	0	0	0	0	0	0	0	0	0	0	14	0	0	0	0	0	0	Bacteria; Bacteroidetes; Flavobacteriia; Flavobacteriales; Cryomorphaceae; Fluviicola; uncultured bacterium
249	0	0	0	0	0	0	0	0	0	0	0	0	0	0	1	0	0	0	0	0	0	0	0	0	0	0	Bacteria; Bacteroidetes; Flavobacteriia; Flavobacteriales; Cryomorphaceae; Fluviicola; uncultured bacterium
250	0	0	0	0	0	0	0	0	0	0	0	0	0	0	0	0	0	0	0	0	0	0	0	0	1	0	Bacteria; Bacteroidetes; Flavobacteriia; Flavobacteriales; Cryomorphaceae; Fluviicola; uncultured bacterium
251	0	0	0	0	0	0	0	0	0	0	0	0	0	0	0	0	0	0	1	0	0	0	0	0	0	0	Bacteria; Bacteroidetes; Flavobacteriia; Flavobacteriales; Cryomorphaceae; Fluviicola; uncultured bacterium
252	0	0	0	0	0	0	0	0	0	0	0	0	0	0	1	0	0	0	0	0	0	0	0	0	0	0	Bacteria; Bacteroidetes; Flavobacteriia; Flavobacteriales; Cryomorphaceae; Fluviicola; uncultured bacterium
253	0	0	0	0	0	0	0	0	0	0	0	0	0	0	1	0	0	0	0	0	0	0	0	0	0	0	Bacteria; Bacteroidetes; Flavobacteriia; Flavobacteriales; Cryomorphaceae; Fluviicola; uncultured bacterium
254	0	0	0	0	0	0	0	3	0	0	3	0	0	0	0	0	0	1	0	0	0	0	0	0	0	0	Bacteria; Bacteroidetes; Flavobacteriia; Flavobacteriales; Cryomorphaceae; Fluviicola; uncultured bacterium
255	1	0	0	0	0	0	0	0	0	0	0	0	0	7	0	0	0	0	0	0	0	0	0	0	0	0	Bacteria; Bacteroidetes; Flavobacteriia; Flavobacteriales; Cryomorphaceae; Fluviicola; uncultured bacterium
256	0	0	0	0	0	0	0	0	0	0	0	0	0	0	1	0	0	0	0	0	0	0	0	0	0	0	Bacteria; Bacteroidetes; Flavobacteriia; Flavobacteriales; Cryomorphaceae; Fluviicola; uncultured bacterium
257	0	0	0	0	0	0	0	0	0	0	0	0	0	0	0	1	0	0	0	0	0	0	0	0	0	0	Bacteria; Bacteroidetes; Flavobacteriia; Flavobacteriales; Cryomorphaceae; Fluviicola; uncultured bacterium
258	0	0	0	0	0	0	0	0	0	0	0	0	0	0	0	0	0	0	7	0	0	2	0	0	0	0	Bacteria; Bacteroidetes; Flavobacteriia; Flavobacteriales; Cryomorphaceae; Fluviicola; uncultured bacterium
259	0	0	0	0	0	0	0	0	0	0	0	0	0	0	1	0	0	0	0	0	0	0	0	0	0	0	Bacteria; Bacteroidetes; Flavobacteriia; Flavobacteriales; Cryomorphaceae; Fluviicola; uncultured bacterium
260	0	0	0	0	0	0	0	0	0	0	0	0	0	0	0	0	0	0	0	0	0	0	0	0	0	1	Bacteria; Bacteroidetes; Flavobacteriia; Flavobacteriales; Cryomorphaceae; Fluviicola; uncultured bacterium
261	0	0	0	0	0	0	0	0	0	0	0	0	0	0	0	0	0	0	0	1	0	0	0	0	0	0	Bacteria; Bacteroidetes; Flavobacteriia; Flavobacteriales; Cryomorphaceae; Fluviicola; uncultured bacterium
262	0	0	0	0	0	0	0	0	0	0	0	0	0	0	1	0	0	0	0	0	0	0	0	0	0	0	Bacteria; Bacteroidetes; Flavobacteriia; Flavobacteriales; Cryomorphaceae; Fluviicola; uncultured bacterium
263	49	101	38	6	21	204	77	80	7	47	8	37	17	84	468	18	4	13	470	477	121	3	60	11	1	11	Bacteria; Bacteroidetes; Flavobacteriia; Flavobacteriales; Cryomorphaceae; Fluviicola; uncultured bacterium
264	0	0	0	0	0	0	0	0	0	0	0	0	0	0	0	0	0	0	0	0	0	0	0	0	3	0	Bacteria; Bacteroidetes; Flavobacteriia; Flavobacteriales; Cryomorphaceae; Fluviicola; uncultured bacterium
265	2	1	4	1	0	3	0	0	0	0	0	0	2	0	1	2	0	0	5	1	0	0	0	0	0	0	Bacteria; Bacteroidetes; Flavobacteriia; Flavobacteriales; Cryomorphaceae; Fluviicola; uncultured bacterium
266	0	0	0	0	0	0	0	0	0	0	0	0	0	0	0	0	0	0	1	0	0	0	0	0	0	0	Bacteria; Bacteroidetes; Flavobacteriia; Flavobacteriales; Cryomorphaceae; Fluviicola; uncultured bacterium
267	0	0	0	0	0	0	0	0	0	0	0	0	0	1	0	1	24	0	0	1	1	0	1	1	0	0	Bacteria; Bacteroidetes; Flavobacteriia; Flavobacteriales; Cryomorphaceae; Fluviicola; uncultured bacterium
268	0	0	1	0	0	0	1	0	0	0	0	0	0	0	0	0	0	0	0	0	0	0	0	0	0	0	Bacteria; Bacteroidetes; Flavobacteriia; Flavobacteriales; Cryomorphaceae; Fluviicola; uncultured bacterium
269	22	41	0	0	0	3	0	0	1	2	1	6	0	0	0	0	0	0	0	0	0	0	0	0	0	0	Bacteria; Bacteroidetes; Flavobacteriia; Flavobacteriales; Cryomorphaceae; Fluviicola; uncultured bacterium
270	0	0	0	0	0	0	0	0	0	0	0	0	0	0	0	0	0	0	1	0	0	0	0	0	0	0	Bacteria; Bacteroidetes; Flavobacteriia; Flavobacteriales; Cryomorphaceae; Fluviicola; uncultured Flavobacteriales bacterium
271	0	0	0	0	0	0	0	0	0	0	0	0	0	0	0	0	0	0	0	0	0	0	0	0	0	1	Bacteria; Bacteroidetes; Flavobacteriia; Flavobacteriales; Cryomorphaceae; Fluviicola; uncultured Flavobacteriia bacterium
272	0	0	0	29	0	0	0	0	0	0	0	3	19	0	0	0	0	0	0	0	3	0	0	0	0	5	Bacteria; Bacteroidetes; Flavobacteriia; Flavobacteriales; Cryomorphaceae; Fluviicola; uncultured Flavobacteriia bacterium
273	0	0	0	0	0	0	0	0	0	0	0	0	0	1	0	0	0	0	0	0	0	0	0	0	0	0	Bacteria; Bacteroidetes; Flavobacteriia; Flavobacteriales; Cryomorphaceae; NS10 marine group; marine metagenome
274	0	0	0	1	0	0	0	7	0	1	3	6	0	1	0	0	0	0	6	5	15	0	0	7	1	3	Bacteria; Bacteroidetes; Flavobacteriia; Flavobacteriales; Cryomorphaceae; NS10 marine group; uncultured bacterium
275	0	0	0	0	0	0	0	0	0	0	0	0	0	0	0	0	0	0	0	0	0	0	1	0	0	0	Bacteria; Bacteroidetes; Flavobacteriia; Flavobacteriales; Cryomorphaceae; NS10 marine group; uncultured bacterium
276	0	0	0	0	0	0	0	0	0	0	0	0	0	0	1	0	0	0	0	0	0	0	0	0	0	0	Bacteria; Bacteroidetes; Flavobacteriia; Flavobacteriales; Cryomorphaceae; NS10 marine group; uncultured bacterium
277	0	0	0	0	0	0	0	0	0	1	0	0	0	0	0	0	0	0	0	0	0	0	0	0	0	0	Bacteria; Bacteroidetes; Flavobacteriia; Flavobacteriales; Cryomorphaceae; NS10 marine group; uncultured bacterium
278	0	0	0	0	0	0	0	0	0	0	0	0	0	0	0	0	0	0	0	0	0	0	0	1	0	0	Bacteria; Bacteroidetes; Flavobacteriia; Flavobacteriales; Cryomorphaceae; NS10 marine group; uncultured bacterium
279	0	0	0	0	0	0	0	0	0	0	0	0	0	0	0	0	0	0	0	0	0	0	0	0	0	2	Bacteria; Bacteroidetes; Flavobacteriia; Flavobacteriales; Cryomorphaceae; NS10 marine group; uncultured bacterium
280	0	0	0	0	0	0	0	0	0	0	0	0	0	0	0	0	0	0	0	0	0	0	0	0	0	1	Bacteria; Bacteroidetes; Flavobacteriia; Flavobacteriales; Cryomorphaceae; NS10 marine group; uncultured bacterium
281	0	0	0	151	9	0	0	0	4	2	39	3	208	1	0	0	0	11	7	1	0	16	5	69	1	314	Bacteria; Bacteroidetes; Flavobacteriia; Flavobacteriales; Cryomorphaceae; NS10 marine group; uncultured bacterium
282	0	0	0	9	0	0	0	0	0	0	0	0	7	0	0	0	0	0	0	0	0	0	0	0	3	7	Bacteria; Bacteroidetes; Flavobacteriia; Flavobacteriales; Cryomorphaceae; NS10 marine group; uncultured bacterium
283	0	0	0	0	0	0	0	0	0	0	0	0	0	0	0	0	0	0	0	1	0	0	0	0	0	0	Bacteria; Bacteroidetes; Flavobacteriia; Flavobacteriales; Cryomorphaceae; NS10 marine group; uncultured bacterium
284	0	0	0	0	0	0	0	0	0	0	0	0	0	0	0	0	0	0	0	0	0	0	1	0	0	0	Bacteria; Bacteroidetes; Flavobacteriia; Flavobacteriales; Cryomorphaceae; NS10 marine group; uncultured bacterium
285	0	0	0	0	0	0	0	0	0	0	0	0	0	0	0	0	0	0	0	0	0	0	0	0	1	0	Bacteria; Bacteroidetes; Flavobacteriia; Flavobacteriales; Cryomorphaceae; NS10 marine group; uncultured Bacteroidetes/Chlorobi group bacterium
286	0	0	0	0	0	2	0	0	6	0	19	9	4	0	0	0	0	1	1	1	0	0	0	1	1	0	Bacteria; Bacteroidetes; Flavobacteriia; Flavobacteriales; Cryomorphaceae; NS10 marine group; uncultured Bacteroidetes/Chlorobi group bacterium
287	0	0	0	0	0	0	0	0	0	0	0	0	0	0	0	0	0	0	0	1	0	0	0	0	0	0	Bacteria; Bacteroidetes; Flavobacteriia; Flavobacteriales; Cryomorphaceae; NS10 marine group; uncultured Flavobacteriales bacterium
288	0	0	0	0	0	0	0	0	0	0	0	0	0	0	0	0	0	0	0	0	0	0	0	0	1	0	Bacteria; Bacteroidetes; Flavobacteriia; Flavobacteriales; Cryomorphaceae; NS10 marine group; uncultured Flavobacteriia bacterium
289	0	0	0	0	0	0	0	0	0	0	0	0	0	0	0	0	0	0	0	0	0	0	1	0	0	0	Bacteria; Bacteroidetes; Flavobacteriia; Flavobacteriales; Cryomorphaceae; Owenweeksia; marine metagenome
290	0	0	0	0	0	0	0	0	0	0	0	0	0	0	0	0	0	0	0	0	0	0	0	0	1	0	Bacteria; Bacteroidetes; Flavobacteriia; Flavobacteriales; Cryomorphaceae; Owenweeksia; marine metagenome
291	0	0	0	0	0	0	0	0	0	0	0	0	0	0	0	0	0	0	0	0	0	0	1	0	0	0	Bacteria; Bacteroidetes; Flavobacteriia; Flavobacteriales; Cryomorphaceae; Owenweeksia; marine metagenome
292	0	0	0	0	0	0	0	0	0	0	0	0	0	0	0	0	0	0	0	0	0	0	1	0	0	0	Bacteria; Bacteroidetes; Flavobacteriia; Flavobacteriales; Cryomorphaceae; Owenweeksia; marine metagenome
293	0	0	0	0	0	0	0	0	0	0	0	0	0	0	0	0	0	0	0	0	0	0	0	0	6	0	Bacteria; Bacteroidetes; Flavobacteriia; Flavobacteriales; Cryomorphaceae; Owenweeksia; marine metagenome
294	0	0	0	0	0	4	0	0	0	2	0	0	7	0	0	0	0	0	7	1	0	0	2	0	2	0	Bacteria; Bacteroidetes; Flavobacteriia; Flavobacteriales; Cryomorphaceae; Owenweeksia; marine metagenome
295	0	0	0	0	0	0	0	0	0	0	0	0	0	0	0	0	0	0	0	0	0	26	0	0	0	0	Bacteria; Bacteroidetes; Flavobacteriia; Flavobacteriales; Cryomorphaceae; Owenweeksia; marine metagenome
296	0	0	0	0	0	0	0	0	0	0	0	0	0	0	0	0	0	0	0	0	0	0	0	0	6	0	Bacteria; Bacteroidetes; Flavobacteriia; Flavobacteriales; Cryomorphaceae; Owenweeksia; marine metagenome
297	0	0	0	66	6	7	0	1	23	4	132	25	34	0	0	0	0	2	10	4	4	0	9	202	31	42	Bacteria; Bacteroidetes; Flavobacteriia; Flavobacteriales; Cryomorphaceae; Owenweeksia; marine metagenome
298	7	37	86	7	4	31	2	17	5	18	2	28	17	8	1	35	7	18	109	49	39	10	4	4	15	3	Bacteria; Bacteroidetes; Flavobacteriia; Flavobacteriales; Cryomorphaceae; Owenweeksia; marine metagenome
299	0	0	0	0	0	0	0	0	0	0	0	0	0	0	0	0	0	0	0	0	0	0	0	0	0	1	Bacteria; Bacteroidetes; Flavobacteriia; Flavobacteriales; Cryomorphaceae; Owenweeksia; marine metagenome
300	0	0	0	0	0	0	0	0	0	0	0	0	0	0	0	0	0	0	0	0	0	0	1	0	0	0	Bacteria; Bacteroidetes; Flavobacteriia; Flavobacteriales; Cryomorphaceae; Owenweeksia; marine metagenome
301	0	0	0	0	0	0	0	0	0	0	0	0	0	0	0	0	0	0	3	3	0	0	0	0	0	0	Bacteria; Bacteroidetes; Flavobacteriia; Flavobacteriales; Cryomorphaceae; Owenweeksia; Owenweeksia hongkongensis DSM 17368
302	0	0	0	8	0	0	0	0	0	0	0	0	0	0	0	0	0	0	0	0	0	0	0	0	0	0	Bacteria; Bacteroidetes; Flavobacteriia; Flavobacteriales; Cryomorphaceae; Owenweeksia; uncultured bacterium
303	0	0	0	0	0	0	0	0	0	0	0	0	0	0	0	0	0	0	0	1	0	0	0	0	0	0	Bacteria; Bacteroidetes; Flavobacteriia; Flavobacteriales; Cryomorphaceae; Owenweeksia; uncultured bacterium
304	0	0	0	0	0	0	0	0	0	0	0	0	0	0	1	0	0	0	0	0	0	0	0	0	0	0	Bacteria; Bacteroidetes; Flavobacteriia; Flavobacteriales; Cryomorphaceae; Owenweeksia; uncultured bacterium
305	951	1043	963	28	164	578	274	871	315	99	71	205	25	455	85	385	28	110	1043	1352	946	184	49	70	96	27	Bacteria; Bacteroidetes; Flavobacteriia; Flavobacteriales; Cryomorphaceae; Owenweeksia; uncultured bacterium
306	0	0	0	0	0	0	0	0	0	0	0	0	0	0	0	0	0	0	0	0	0	0	0	0	0	4	Bacteria; Bacteroidetes; Flavobacteriia; Flavobacteriales; Cryomorphaceae; Owenweeksia; uncultured bacterium
307	0	0	1	0	0	0	0	0	0	0	0	0	0	0	0	0	0	0	0	0	0	0	0	0	0	0	Bacteria; Bacteroidetes; Flavobacteriia; Flavobacteriales; Cryomorphaceae; Owenweeksia; uncultured bacterium
308	0	0	0	0	0	0	0	0	0	0	0	0	0	0	0	0	0	0	0	0	13	1	0	0	0	0	Bacteria; Bacteroidetes; Flavobacteriia; Flavobacteriales; Cryomorphaceae; Owenweeksia; uncultured bacterium
309	0	0	0	0	0	0	0	0	0	0	0	0	0	0	0	0	0	0	0	1	0	0	0	0	0	0	Bacteria; Bacteroidetes; Flavobacteriia; Flavobacteriales; Cryomorphaceae; Owenweeksia; uncultured bacterium
310	0	0	0	0	0	0	0	0	0	0	0	0	0	0	1	0	0	0	0	0	0	0	0	0	0	0	Bacteria; Bacteroidetes; Flavobacteriia; Flavobacteriales; Cryomorphaceae; Owenweeksia; uncultured bacterium
311	0	0	0	0	0	0	0	0	0	0	0	0	0	0	0	0	0	0	0	1	0	0	0	0	0	0	Bacteria; Bacteroidetes; Flavobacteriia; Flavobacteriales; Cryomorphaceae; Owenweeksia; uncultured bacterium
312	2	0	0	0	0	0	0	0	0	0	0	0	0	0	0	0	0	0	0	0	0	0	0	0	0	0	Bacteria; Bacteroidetes; Flavobacteriia; Flavobacteriales; Cryomorphaceae; Owenweeksia; uncultured bacterium
313	0	0	0	0	0	0	0	6	0	0	0	0	0	0	0	0	0	0	0	0	0	0	0	0	0	0	Bacteria; Bacteroidetes; Flavobacteriia; Flavobacteriales; Cryomorphaceae; Owenweeksia; uncultured bacterium
314	0	0	0	0	0	0	0	0	0	0	0	0	0	0	0	0	0	0	0	0	0	0	0	0	1	0	Bacteria; Bacteroidetes; Flavobacteriia; Flavobacteriales; Cryomorphaceae; Owenweeksia; uncultured bacterium
315	0	0	0	0	0	0	0	0	0	0	0	0	0	0	1	0	0	0	0	0	0	0	0	0	0	0	Bacteria; Bacteroidetes; Flavobacteriia; Flavobacteriales; Cryomorphaceae; Owenweeksia; uncultured bacterium
316	0	0	0	0	0	0	0	0	0	0	0	0	0	0	0	0	0	0	0	0	6	0	0	0	0	0	Bacteria; Bacteroidetes; Flavobacteriia; Flavobacteriales; Cryomorphaceae; Owenweeksia; uncultured bacterium
317	0	0	0	0	0	0	0	0	0	0	0	0	0	0	0	0	0	0	0	1	0	0	0	0	0	0	Bacteria; Bacteroidetes; Flavobacteriia; Flavobacteriales; Cryomorphaceae; Owenweeksia; uncultured bacterium
318	0	0	0	0	0	0	0	0	0	0	0	0	0	0	0	0	0	0	0	1	0	0	0	0	0	0	Bacteria; Bacteroidetes; Flavobacteriia; Flavobacteriales; Cryomorphaceae; Owenweeksia; uncultured bacterium
319	0	0	0	0	0	0	0	0	0	0	0	0	0	0	0	0	0	11	0	0	0	0	0	0	0	0	Bacteria; Bacteroidetes; Flavobacteriia; Flavobacteriales; Cryomorphaceae; Owenweeksia; uncultured bacterium
320	0	0	0	0	0	0	0	0	0	1	0	0	0	0	2	0	0	0	0	0	0	0	1	0	0	0	Bacteria; Bacteroidetes; Flavobacteriia; Flavobacteriales; Cryomorphaceae; Owenweeksia; uncultured bacterium
321	0	1	0	0	0	0	0	2	0	0	0	0	0	0	0	0	0	0	0	1	0	0	0	0	0	0	Bacteria; Bacteroidetes; Flavobacteriia; Flavobacteriales; Cryomorphaceae; Owenweeksia; uncultured bacterium
322	0	0	0	0	0	0	0	0	0	0	0	0	0	0	0	0	0	0	0	1	0	0	0	0	0	0	Bacteria; Bacteroidetes; Flavobacteriia; Flavobacteriales; Cryomorphaceae; Owenweeksia; uncultured bacterium
323	0	0	0	0	0	0	0	0	0	0	0	0	0	1	1	0	0	0	0	0	0	0	0	0	0	0	Bacteria; Bacteroidetes; Flavobacteriia; Flavobacteriales; Cryomorphaceae; Owenweeksia; uncultured bacterium
324	0	0	0	49	0	0	0	0	107	50	32	0	36	0	0	0	0	0	0	0	0	0	0	0	0	0	Bacteria; Bacteroidetes; Flavobacteriia; Flavobacteriales; Cryomorphaceae; Owenweeksia; uncultured bacterium
325	0	0	0	0	0	0	0	0	0	0	0	0	0	0	0	0	0	0	0	1	0	0	0	0	0	0	Bacteria; Bacteroidetes; Flavobacteriia; Flavobacteriales; Cryomorphaceae; Owenweeksia; uncultured bacterium
326	0	0	0	0	0	0	0	0	0	0	0	0	0	0	0	0	0	0	0	0	0	18	0	0	0	0	Bacteria; Bacteroidetes; Flavobacteriia; Flavobacteriales; Cryomorphaceae; Owenweeksia; uncultured bacterium
327	0	0	0	1	0	0	0	0	0	0	0	0	1	0	0	0	0	0	0	0	0	0	0	1	2	0	Bacteria; Bacteroidetes; Flavobacteriia; Flavobacteriales; Cryomorphaceae; Owenweeksia; uncultured bacterium
328	0	0	0	0	0	0	0	0	0	1	0	0	0	0	0	0	0	0	0	0	0	0	1	0	0	0	Bacteria; Bacteroidetes; Flavobacteriia; Flavobacteriales; Cryomorphaceae; Owenweeksia; uncultured bacterium
329	0	0	0	0	0	0	0	0	0	0	0	0	0	0	1	0	0	0	0	0	0	0	0	0	0	0	Bacteria; Bacteroidetes; Flavobacteriia; Flavobacteriales; Cryomorphaceae; Owenweeksia; uncultured bacterium
330	0	0	0	5	0	0	0	0	0	0	9	0	8	0	0	0	0	0	13	0	0	0	0	0	1	0	Bacteria; Bacteroidetes; Flavobacteriia; Flavobacteriales; Cryomorphaceae; Owenweeksia; uncultured bacterium
331	0	0	0	0	0	0	0	0	0	0	0	0	0	0	0	0	0	0	0	1	0	0	0	0	0	0	Bacteria; Bacteroidetes; Flavobacteriia; Flavobacteriales; Cryomorphaceae; Owenweeksia; uncultured bacterium
332	1	1	1	0	1	2	0	0	0	0	0	0	0	0	3	0	1	1	7	3	5	0	0	0	0	0	Bacteria; Bacteroidetes; Flavobacteriia; Flavobacteriales; Cryomorphaceae; Owenweeksia; uncultured bacterium
333	0	0	0	0	0	0	0	0	0	0	0	0	0	0	0	0	0	0	0	0	1	0	0	0	0	0	Bacteria; Bacteroidetes; Flavobacteriia; Flavobacteriales; Cryomorphaceae; Owenweeksia; uncultured bacterium
334	0	9	0	0	0	20	0	0	0	0	0	0	0	0	0	0	0	0	0	31	0	0	2	0	0	0	Bacteria; Bacteroidetes; Flavobacteriia; Flavobacteriales; Cryomorphaceae; Owenweeksia; uncultured bacterium
335	1	1	1	0	0	0	0	1	0	0	0	0	0	0	0	0	0	0	0	0	0	0	0	0	0	0	Bacteria; Bacteroidetes; Flavobacteriia; Flavobacteriales; Cryomorphaceae; Owenweeksia; uncultured bacterium
336	0	0	0	0	0	0	0	0	0	0	0	0	0	0	0	0	0	0	0	0	0	0	1	0	0	0	Bacteria; Bacteroidetes; Flavobacteriia; Flavobacteriales; Cryomorphaceae; Owenweeksia; uncultured bacterium
337	45	69	0	4	0	16	0	0	18	0	6	32	0	0	0	0	0	0	0	0	0	0	0	0	0	0	Bacteria; Bacteroidetes; Flavobacteriia; Flavobacteriales; Cryomorphaceae; Owenweeksia; uncultured bacterium
338	0	0	0	0	0	0	0	0	0	0	0	0	0	0	2	0	0	0	0	0	0	0	0	0	0	0	Bacteria; Bacteroidetes; Flavobacteriia; Flavobacteriales; Cryomorphaceae; Owenweeksia; uncultured bacterium
339	0	0	0	0	0	0	0	0	6	10	1	2	0	0	0	0	0	0	0	1	0	5	2	0	0	3	Bacteria; Bacteroidetes; Flavobacteriia; Flavobacteriales; Cryomorphaceae; Owenweeksia; uncultured bacterium
340	0	0	0	0	0	0	0	0	0	0	0	0	0	0	0	0	0	1	0	0	0	0	0	0	0	0	Bacteria; Bacteroidetes; Flavobacteriia; Flavobacteriales; Cryomorphaceae; Owenweeksia; uncultured bacterium
341	0	0	0	0	0	0	1	0	0	0	0	0	0	0	1	0	0	0	0	0	0	0	0	0	0	0	Bacteria; Bacteroidetes; Flavobacteriia; Flavobacteriales; Cryomorphaceae; Owenweeksia; uncultured bacterium
342	0	0	0	0	0	1	0	1	0	0	0	5	0	0	0	0	0	0	1	2	0	0	0	0	2	0	Bacteria; Bacteroidetes; Flavobacteriia; Flavobacteriales; Cryomorphaceae; Owenweeksia; uncultured bacterium
343	0	0	0	0	0	0	0	0	0	0	0	0	0	0	0	0	0	0	1	0	0	0	0	0	0	0	Bacteria; Bacteroidetes; Flavobacteriia; Flavobacteriales; Cryomorphaceae; Owenweeksia; uncultured bacterium
344	0	0	0	0	0	0	0	0	2	20	0	1	0	0	0	0	0	0	0	0	0	0	17	0	0	0	Bacteria; Bacteroidetes; Flavobacteriia; Flavobacteriales; Cryomorphaceae; Owenweeksia; uncultured bacterium
345	0	0	0	0	0	0	0	1	0	0	0	0	0	0	0	0	0	0	1	0	3	0	0	0	0	0	Bacteria; Bacteroidetes; Flavobacteriia; Flavobacteriales; Cryomorphaceae; Owenweeksia; uncultured bacterium
346	1	7	10	0	0	0	0	0	0	0	0	0	5	0	0	14	0	0	18	1	0	0	0	0	0	1	Bacteria; Bacteroidetes; Flavobacteriia; Flavobacteriales; Cryomorphaceae; Owenweeksia; uncultured bacterium
347	0	0	0	0	0	0	0	0	0	0	0	0	0	6	0	0	1	0	0	0	0	0	0	0	0	0	Bacteria; Bacteroidetes; Flavobacteriia; Flavobacteriales; Cryomorphaceae; Owenweeksia; uncultured bacterium
348	0	0	0	0	0	0	0	0	0	0	0	0	0	0	0	0	0	0	0	0	0	0	0	0	1	0	Bacteria; Bacteroidetes; Flavobacteriia; Flavobacteriales; Cryomorphaceae; Owenweeksia; uncultured bacterium
349	0	0	0	0	0	0	0	0	0	0	1	0	0	0	0	0	0	0	0	0	0	0	0	0	0	0	Bacteria; Bacteroidetes; Flavobacteriia; Flavobacteriales; Cryomorphaceae; Owenweeksia; uncultured bacterium
350	0	0	0	0	0	0	0	0	0	0	0	0	0	0	0	0	0	0	0	1	0	0	0	0	0	0	Bacteria; Bacteroidetes; Flavobacteriia; Flavobacteriales; Cryomorphaceae; Owenweeksia; uncultured bacterium
351	0	0	0	22	0	0	0	0	3	0	4	3	25	0	0	0	0	0	0	0	0	0	0	0	0	0	Bacteria; Bacteroidetes; Flavobacteriia; Flavobacteriales; Cryomorphaceae; Owenweeksia; uncultured bacterium
352	0	0	0	0	0	0	0	0	0	0	0	0	0	0	0	0	0	0	0	0	0	0	0	0	0	1	Bacteria; Bacteroidetes; Flavobacteriia; Flavobacteriales; Cryomorphaceae; Owenweeksia; uncultured bacterium
353	0	0	0	0	1	1	1	2	0	0	0	0	0	6	0	0	0	0	0	0	0	0	0	0	0	0	Bacteria; Bacteroidetes; Flavobacteriia; Flavobacteriales; Cryomorphaceae; Owenweeksia; uncultured bacterium
354	0	0	0	0	0	0	0	0	0	0	0	0	0	0	0	0	0	0	0	0	0	0	1	0	0	0	Bacteria; Bacteroidetes; Flavobacteriia; Flavobacteriales; Cryomorphaceae; Owenweeksia; uncultured bacterium
355	0	0	0	0	0	0	0	0	0	0	0	0	0	0	1	0	0	0	0	0	0	0	0	0	0	0	Bacteria; Bacteroidetes; Flavobacteriia; Flavobacteriales; Cryomorphaceae; Owenweeksia; uncultured bacterium
356	0	0	0	0	0	0	0	0	0	2	1	3	0	0	0	0	0	0	0	0	0	0	0	0	0	0	Bacteria; Bacteroidetes; Flavobacteriia; Flavobacteriales; Cryomorphaceae; Owenweeksia; uncultured Bacteroidetes bacterium
357	0	0	0	0	0	0	0	0	0	0	0	0	0	0	0	0	0	0	0	0	0	0	0	0	1	0	Bacteria; Bacteroidetes; Flavobacteriia; Flavobacteriales; Cryomorphaceae; Owenweeksia; uncultured Bacteroidetes bacterium
358	0	0	0	0	0	0	0	0	0	0	0	0	0	0	0	0	0	0	0	0	0	0	0	1	0	0	Bacteria; Bacteroidetes; Flavobacteriia; Flavobacteriales; Cryomorphaceae; Owenweeksia; uncultured Bacteroidetes bacterium
359	0	0	0	0	0	0	0	0	0	0	0	0	0	0	1	0	0	0	0	0	0	0	0	0	0	0	Bacteria; Bacteroidetes; Flavobacteriia; Flavobacteriales; Cryomorphaceae; Owenweeksia; uncultured Bacteroidetes bacterium
360	0	0	0	0	0	0	0	4	0	0	0	0	0	0	0	0	0	0	0	0	0	0	0	0	0	0	Bacteria; Bacteroidetes; Flavobacteriia; Flavobacteriales; Cryomorphaceae; Owenweeksia; uncultured Bacteroidetes bacterium
361	0	0	0	0	0	0	0	0	0	0	0	0	0	0	0	0	0	0	0	0	1	0	0	0	0	0	Bacteria; Bacteroidetes; Flavobacteriia; Flavobacteriales; Cryomorphaceae; Owenweeksia; uncultured Bacteroidetes bacterium
362	0	0	0	49	0	0	0	0	0	0	0	0	53	0	0	0	0	0	0	0	0	0	0	0	0	31	Bacteria; Bacteroidetes; Flavobacteriia; Flavobacteriales; Cryomorphaceae; Owenweeksia; uncultured Bacteroidetes bacterium
363	0	0	0	3	0	0	0	0	0	0	1	0	5	0	0	0	0	0	0	0	0	0	0	1	0	19	Bacteria; Bacteroidetes; Flavobacteriia; Flavobacteriales; Cryomorphaceae; Owenweeksia; uncultured Bacteroidetes bacterium
364	0	0	0	0	0	0	0	0	0	0	0	0	0	0	1	0	0	0	0	0	0	0	0	0	0	0	Bacteria; Bacteroidetes; Flavobacteriia; Flavobacteriales; Cryomorphaceae; Owenweeksia; uncultured Bacteroidetes bacterium
365	0	0	0	0	0	0	0	0	0	0	0	0	0	0	0	0	0	0	0	0	0	0	0	0	0	1	Bacteria; Bacteroidetes; Flavobacteriia; Flavobacteriales; Cryomorphaceae; Owenweeksia; uncultured Bacteroidetes bacterium
366	0	0	0	0	0	0	0	0	7	0	3	0	0	0	0	0	0	0	0	0	0	0	0	0	0	1	Bacteria; Bacteroidetes; Flavobacteriia; Flavobacteriales; Cryomorphaceae; Owenweeksia; uncultured Bacteroidetes bacterium
367	0	0	0	0	0	0	0	0	0	0	0	0	0	0	1	0	0	0	0	0	0	0	0	0	0	0	Bacteria; Bacteroidetes; Flavobacteriia; Flavobacteriales; Cryomorphaceae; Owenweeksia; uncultured Bacteroidetes bacterium
368	0	0	0	0	0	0	0	0	0	0	0	0	0	0	0	0	0	0	0	1	0	0	0	0	0	0	Bacteria; Bacteroidetes; Flavobacteriia; Flavobacteriales; Cryomorphaceae; Owenweeksia; uncultured Bacteroidetes bacterium
369	0	0	0	0	0	0	0	0	0	0	0	0	0	0	2	0	0	0	0	0	0	0	0	0	0	0	Bacteria; Bacteroidetes; Flavobacteriia; Flavobacteriales; Cryomorphaceae; Owenweeksia; uncultured Bacteroidetes bacterium
370	0	0	0	0	0	0	0	0	0	0	0	0	0	0	0	0	0	0	0	0	0	0	0	0	0	1	Bacteria; Bacteroidetes; Flavobacteriia; Flavobacteriales; Cryomorphaceae; Owenweeksia; uncultured Bacteroidetes bacterium
371	0	0	0	0	0	0	0	0	0	0	0	0	0	0	0	0	0	0	0	0	0	0	0	0	5	0	Bacteria; Bacteroidetes; Flavobacteriia; Flavobacteriales; Cryomorphaceae; Owenweeksia; uncultured Bacteroidetes bacterium
372	0	0	0	0	0	0	0	0	0	0	0	0	0	1	0	0	0	0	0	0	0	0	0	0	0	0	Bacteria; Bacteroidetes; Flavobacteriia; Flavobacteriales; Cryomorphaceae; Owenweeksia; uncultured Cryomorphaceae bacterium
373	0	0	0	0	0	0	0	0	0	0	0	0	0	0	0	0	0	0	0	0	0	0	1	0	0	0	Bacteria; Bacteroidetes; Flavobacteriia; Flavobacteriales; Cryomorphaceae; Owenweeksia; uncultured Cryomorphaceae bacterium
374	0	0	0	0	0	21	0	0	9	0	7	8	0	0	0	0	0	1	19	72	0	0	1	0	0	0	Bacteria; Bacteroidetes; Flavobacteriia; Flavobacteriales; Cryomorphaceae; Owenweeksia; uncultured Flavobacterium sp.
375	0	0	0	0	0	0	0	0	0	0	0	0	0	0	0	0	0	0	0	0	0	0	0	1	0	0	Bacteria; Bacteroidetes; Flavobacteriia; Flavobacteriales; Cryomorphaceae; Owenweeksia; uncultured Flavobacterium sp.
376	0	0	0	0	0	0	0	0	0	0	0	0	0	0	0	0	0	0	0	0	0	0	1	0	0	0	Bacteria; Bacteroidetes; Flavobacteriia; Flavobacteriales; Cryomorphaceae; Owenweeksia; uncultured Flavobacterium sp.
377	0	1	1	0	0	3	6	2	0	0	0	2	0	0	16	0	0	0	2	20	4	1	0	0	0	0	Bacteria; Bacteroidetes; Flavobacteriia; Flavobacteriales; Cryomorphaceae; Owenweeksia; uncultured Flavobacterium sp.
378	0	0	0	0	0	0	0	0	0	0	0	0	0	0	1	0	0	0	0	0	0	0	0	0	0	0	Bacteria; Bacteroidetes; Flavobacteriia; Flavobacteriales; Cryomorphaceae; Owenweeksia; uncultured Flavobacterium sp.
379	10	1	0	1	0	0	0	0	1	0	2	0	0	1	0	4	0	0	0	0	0	0	0	0	0	0	Bacteria; Bacteroidetes; Flavobacteriia; Flavobacteriales; Cryomorphaceae; Owenweeksia; uncultured Flavobacterium sp.
380	0	0	1	0	0	0	0	0	1	6	1	3	0	0	1	0	0	0	0	0	0	0	10	0	0	0	Bacteria; Bacteroidetes; Flavobacteriia; Flavobacteriales; Cryomorphaceae; Owenweeksia; uncultured Flavobacterium sp.
381	0	0	0	0	0	0	0	0	0	0	0	0	0	0	0	0	0	0	1	0	0	0	0	0	0	0	Bacteria; Bacteroidetes; Flavobacteriia; Flavobacteriales; Cryomorphaceae; Owenweeksia; uncultured Flavobacterium sp.
382	0	0	0	0	0	0	0	0	0	0	0	0	0	0	1	0	0	0	0	0	0	0	0	0	0	0	Bacteria; Bacteroidetes; Flavobacteriia; Flavobacteriales; Cryomorphaceae; Owenweeksia; uncultured Flavobacterium sp.
383	0	0	0	0	0	0	0	0	0	0	0	0	0	0	0	0	0	0	0	0	0	0	0	0	1	0	Bacteria; Bacteroidetes; Flavobacteriia; Flavobacteriales; Cryomorphaceae; Owenweeksia; uncultured marine bacterium
384	0	0	0	0	0	0	0	0	0	0	0	0	0	0	0	0	0	0	0	1	0	0	0	0	0	0	Bacteria; Bacteroidetes; Flavobacteriia; Flavobacteriales; Cryomorphaceae; Owenweeksia; uncultured marine bacterium
385	0	0	0	0	0	0	0	0	0	0	0	0	0	0	0	0	0	0	0	0	0	1	0	0	0	0	Bacteria; Bacteroidetes; Flavobacteriia; Flavobacteriales; Cryomorphaceae; Owenweeksia; uncultured marine bacterium
386	0	0	0	0	0	0	0	0	0	0	0	0	0	0	0	0	0	0	0	0	0	0	0	0	0	1	Bacteria; Bacteroidetes; Flavobacteriia; Flavobacteriales; Cryomorphaceae; Owenweeksia; uncultured marine bacterium
387	0	0	0	0	0	0	0	0	0	0	0	0	0	0	0	0	0	0	0	0	0	0	0	0	12	0	Bacteria; Bacteroidetes; Flavobacteriia; Flavobacteriales; Cryomorphaceae; Owenweeksia; uncultured marine bacterium
388	0	0	0	0	0	0	0	0	0	0	0	0	0	0	0	0	0	0	0	0	0	0	0	0	0	1	Bacteria; Bacteroidetes; Flavobacteriia; Flavobacteriales; Cryomorphaceae; Owenweeksia; uncultured marine bacterium
389	0	0	0	0	0	0	0	0	0	0	0	0	1	0	0	0	0	0	0	0	0	0	0	0	0	0	Bacteria; Bacteroidetes; Flavobacteriia; Flavobacteriales; Cryomorphaceae; Owenweeksia; uncultured marine bacterium
390	0	0	0	0	0	0	0	0	0	0	0	0	0	0	0	0	0	0	0	0	0	0	0	0	2	0	Bacteria; Bacteroidetes; Flavobacteriia; Flavobacteriales; Cryomorphaceae; Owenweeksia; uncultured marine bacterium
391	0	0	0	0	0	0	0	0	0	0	0	0	0	0	0	0	0	0	1	0	0	0	0	0	0	0	Bacteria; Bacteroidetes; Flavobacteriia; Flavobacteriales; Cryomorphaceae; Owenweeksia; uncultured marine bacterium
392	0	0	0	0	0	0	0	0	0	0	0	0	0	0	0	0	0	0	0	0	0	0	0	0	0	2	Bacteria; Bacteroidetes; Flavobacteriia; Flavobacteriales; Cryomorphaceae; Owenweeksia; uncultured marine bacterium
393	0	0	0	0	0	0	0	0	0	0	0	0	0	0	0	0	0	0	0	0	1	0	0	0	0	0	Bacteria; Bacteroidetes; Flavobacteriia; Flavobacteriales; Cryomorphaceae; Owenweeksia; uncultured marine bacterium
394	0	0	1	10	0	0	0	0	0	0	0	0	10	1	15	1	0	0	0	0	1	1	0	0	0	27	Bacteria; Bacteroidetes; Flavobacteriia; Flavobacteriales; Cryomorphaceae; Owenweeksia; uncultured marine bacterium
395	0	0	0	1	0	0	0	0	0	0	0	0	0	0	0	0	0	0	0	0	0	0	0	0	0	1	Bacteria; Bacteroidetes; Flavobacteriia; Flavobacteriales; Cryomorphaceae; Owenweeksia; uncultured Owenweeksia sp.
396	0	0	0	2	0	0	0	0	0	0	0	0	0	0	0	0	0	0	0	0	0	0	0	0	0	1	Bacteria; Bacteroidetes; Flavobacteriia; Flavobacteriales; Cryomorphaceae; Owenweeksia; uncultured Owenweeksia sp.
397	0	0	0	0	0	1	0	0	0	0	0	0	0	0	0	0	0	0	0	0	0	0	0	0	0	0	Bacteria; Bacteroidetes; Flavobacteriia; Flavobacteriales; Cryomorphaceae; uncultured; uncultured bacterium
398	0	0	0	0	0	0	0	0	0	0	0	0	0	0	1	0	0	0	0	0	0	0	0	0	0	0	Bacteria; Bacteroidetes; Flavobacteriia; Flavobacteriales; Cryomorphaceae; uncultured; uncultured Flavobacteriia bacterium
399	0	0	0	0	0	0	0	0	0	0	0	0	0	0	1	0	0	0	0	0	0	0	0	0	0	0	Bacteria; Bacteroidetes; Flavobacteriia; Flavobacteriales; Cryomorphaceae; uncultured; uncultured Flavobacteriia bacterium
400	0	0	0	0	0	0	0	0	0	0	0	0	0	0	5	0	0	0	0	0	0	0	0	0	0	0	Bacteria; Bacteroidetes; Flavobacteriia; Flavobacteriales; Cryomorphaceae; uncultured; uncultured sediment bacterium
401	0	0	0	0	0	0	0	0	0	12	0	0	0	0	0	0	0	0	0	0	0	0	0	0	0	0	Bacteria; Bacteroidetes; Flavobacteriia; Flavobacteriales; Flavobacteriaceae; Algibacter; Algibacter lectus
402	0	0	0	0	0	0	0	0	0	0	0	0	0	1	0	0	0	0	0	0	0	0	0	0	0	0	Bacteria; Bacteroidetes; Flavobacteriia; Flavobacteriales; Flavobacteriaceae; Aquimarina; Aquimarina sp. Aq103
403	0	0	0	0	0	0	0	0	0	0	0	0	0	0	0	0	0	0	0	1	0	0	0	0	0	0	Bacteria; Bacteroidetes; Flavobacteriia; Flavobacteriales; Flavobacteriaceae; Aquimarina; Flavobacteriaceae bacterium HQM9
404	0	0	0	0	0	0	0	0	0	0	0	0	0	0	1	0	0	0	0	0	0	0	0	0	0	0	Bacteria; Bacteroidetes; Flavobacteriia; Flavobacteriales; Flavobacteriaceae; Bergeyella; uncultured bacterium
405	0	0	0	0	0	0	0	0	0	0	0	0	0	0	0	0	0	0	0	1	0	0	0	0	0	0	Bacteria; Bacteroidetes; Flavobacteriia; Flavobacteriales; Flavobacteriaceae; Bizionia; uncultured Bacteroidetes bacterium
406	0	0	0	0	0	0	0	0	0	0	0	0	0	1	6	0	0	0	0	0	0	0	0	0	0	0	Bacteria; Bacteroidetes; Flavobacteriia; Flavobacteriales; Flavobacteriaceae; Cellulophaga; Cellulophaga fucicola
407	0	0	0	0	0	0	0	1	0	0	0	0	0	0	0	0	0	0	0	0	0	0	0	0	0	0	Bacteria; Bacteroidetes; Flavobacteriia; Flavobacteriales; Flavobacteriaceae; Chryseobacterium; uncultured Bacteroidetes bacterium
408	0	0	0	0	0	0	0	0	0	0	0	0	0	0	12	0	0	0	0	0	0	0	0	0	0	0	Bacteria; Bacteroidetes; Flavobacteriia; Flavobacteriales; Flavobacteriaceae; Dokdonia; Dokdonia donghaensis
409	0	0	0	0	0	0	0	1	0	0	0	0	0	0	0	0	0	0	0	0	0	0	0	0	0	0	Bacteria; Bacteroidetes; Flavobacteriia; Flavobacteriales; Flavobacteriaceae; Eudoraea; uncultured bacterium
410	0	0	0	0	0	0	0	0	0	0	0	0	0	0	0	0	0	0	0	0	0	0	1	0	0	0	Bacteria; Bacteroidetes; Flavobacteriia; Flavobacteriales; Flavobacteriaceae; Flavobacterium; Flavobacterium johnsoniae
411	0	0	0	0	0	0	0	0	0	0	0	0	0	1	0	0	0	0	0	0	0	0	0	0	0	0	Bacteria; Bacteroidetes; Flavobacteriia; Flavobacteriales; Flavobacteriaceae; Flavobacterium; Flavobacterium sp. BF.107
412	0	0	0	0	0	0	0	0	0	0	0	0	0	0	0	0	0	1	0	0	0	0	0	0	0	0	Bacteria; Bacteroidetes; Flavobacteriia; Flavobacteriales; Flavobacteriaceae; Flavobacterium; uncultured bacterium
413	0	0	0	0	0	0	0	0	0	0	0	0	0	0	0	0	0	0	0	0	0	0	1	0	0	0	Bacteria; Bacteroidetes; Flavobacteriia; Flavobacteriales; Flavobacteriaceae; Flavobacterium; uncultured bacterium
414	0	0	0	0	0	0	0	0	0	0	0	0	0	0	0	0	0	0	0	0	0	0	0	0	0	1	Bacteria; Bacteroidetes; Flavobacteriia; Flavobacteriales; Flavobacteriaceae; Flavobacterium; uncultured marine bacterium
415	0	0	0	0	0	0	0	0	0	0	0	0	0	0	0	0	0	0	0	1	0	0	0	0	0	0	Bacteria; Bacteroidetes; Flavobacteriia; Flavobacteriales; Flavobacteriaceae; Formosa; Formosa sp. Sl14
416	0	0	0	0	0	0	0	0	0	0	0	0	0	0	1	0	0	0	0	0	0	0	0	0	0	0	Bacteria; Bacteroidetes; Flavobacteriia; Flavobacteriales; Flavobacteriaceae; Formosa; uncultured bacterium
417	0	0	0	0	0	7	0	0	0	0	0	4	0	10	0	0	0	0	0	0	0	0	0	0	0	0	Bacteria; Bacteroidetes; Flavobacteriia; Flavobacteriales; Flavobacteriaceae; Formosa; uncultured bacterium
418	0	0	0	0	0	0	0	0	0	0	0	0	0	0	0	0	0	0	0	0	0	0	29	0	0	0	Bacteria; Bacteroidetes; Flavobacteriia; Flavobacteriales; Flavobacteriaceae; Formosa; uncultured bacterium
419	0	0	0	0	0	0	0	0	0	0	0	0	0	0	0	0	0	0	0	0	0	0	0	0	0	1	Bacteria; Bacteroidetes; Flavobacteriia; Flavobacteriales; Flavobacteriaceae; Formosa; uncultured bacterium
420	0	0	0	0	0	0	0	0	0	0	0	0	0	0	0	0	0	0	0	0	0	0	0	0	0	1	Bacteria; Bacteroidetes; Flavobacteriia; Flavobacteriales; Flavobacteriaceae; Formosa; uncultured bacterium
421	19	7	11	0	0	33	25	43	13	3	11	22	0	0	0	12	28	0	21	64	10	0	0	8	35	0	Bacteria; Bacteroidetes; Flavobacteriia; Flavobacteriales; Flavobacteriaceae; Formosa; uncultured bacterium
422	7	26	167	0	38	79	29	84	315	279	116	153	0	49	29	28	24	0	160	19	59	153	85	87	94	1	Bacteria; Bacteroidetes; Flavobacteriia; Flavobacteriales; Flavobacteriaceae; Formosa; uncultured Bacteroidetes bacterium
423	0	0	0	0	0	0	0	0	0	0	0	0	0	0	0	0	20	0	0	0	0	0	0	0	0	0	Bacteria; Bacteroidetes; Flavobacteriia; Flavobacteriales; Flavobacteriaceae; Formosa; uncultured Bacteroidetes bacterium
424	19	7	0	8	0	28	0	0	182	0	68	84	0	0	0	0	0	0	0	0	0	0	0	0	0	0	Bacteria; Bacteroidetes; Flavobacteriia; Flavobacteriales; Flavobacteriaceae; Formosa; uncultured Bacteroidetes bacterium
425	0	0	0	0	0	0	0	0	0	0	0	0	0	0	0	0	0	0	0	41	0	0	0	0	0	0	Bacteria; Bacteroidetes; Flavobacteriia; Flavobacteriales; Flavobacteriaceae; Formosa; uncultured Bacteroidetes bacterium
426	20	3	0	187	61	0	0	46	4	0	0	0	0	0	0	0	0	51	23	44	0	0	0	0	1	28	Bacteria; Bacteroidetes; Flavobacteriia; Flavobacteriales; Flavobacteriaceae; Formosa; uncultured marine bacterium
427	13	11	0	79	0	15	0	0	0	7	0	67	303	0	0	0	4	0	24	0	0	0	0	0	5	0	Bacteria; Bacteroidetes; Flavobacteriia; Flavobacteriales; Flavobacteriaceae; Formosa; uncultured marine bacterium
428	0	0	0	0	0	0	0	0	0	0	0	0	0	0	0	0	0	0	1	0	0	0	0	0	0	0	Bacteria; Bacteroidetes; Flavobacteriia; Flavobacteriales; Flavobacteriaceae; Gelidibacter; Gelidibacter algens
429	0	0	0	0	0	0	0	0	0	0	0	0	0	0	1	0	0	0	0	0	0	0	0	0	0	0	Bacteria; Bacteroidetes; Flavobacteriia; Flavobacteriales; Flavobacteriaceae; Gramella; uncultured bacterium
430	0	0	0	0	0	0	0	0	0	0	0	0	0	0	0	0	0	0	0	0	0	3	0	0	0	0	Bacteria; Bacteroidetes; Flavobacteriia; Flavobacteriales; Flavobacteriaceae; Lacinutrix; uncultured bacterium
431	0	0	0	0	0	0	0	0	0	0	0	0	0	0	0	0	0	0	0	0	0	0	0	1	0	0	Bacteria; Bacteroidetes; Flavobacteriia; Flavobacteriales; Flavobacteriaceae; Lutibacter; Lutibacter sp. UDC377
432	0	0	0	0	0	0	0	0	0	0	0	0	0	0	0	0	0	0	61	0	0	0	0	0	0	0	Bacteria; Bacteroidetes; Flavobacteriia; Flavobacteriales; Flavobacteriaceae; Lutibacter; uncultured bacterium
433	0	0	0	0	0	0	0	6	0	0	0	0	0	0	28	0	0	0	0	0	0	0	0	0	0	0	Bacteria; Bacteroidetes; Flavobacteriia; Flavobacteriales; Flavobacteriaceae; Lutimonas; uncultured bacterium
434	0	0	0	0	0	0	0	0	0	0	0	0	0	1	0	0	0	0	0	0	0	0	0	0	0	0	Bacteria; Bacteroidetes; Flavobacteriia; Flavobacteriales; Flavobacteriaceae; Maribacter; Maribacter polysiphoniae
435	0	0	0	0	0	0	0	0	0	0	0	0	0	0	2	0	0	0	0	0	0	0	0	0	0	0	Bacteria; Bacteroidetes; Flavobacteriia; Flavobacteriales; Flavobacteriaceae; Maribacter; uncultured Maribacter sp.
436	0	0	1	0	0	0	0	0	0	0	0	0	0	0	0	1	0	0	0	0	0	0	0	0	0	0	Bacteria; Bacteroidetes; Flavobacteriia; Flavobacteriales; Flavobacteriaceae; Maritimimonas; uncultured bacterium
437	0	0	0	0	0	0	0	0	0	0	0	0	0	0	0	0	0	0	0	0	0	0	0	0	1	0	Bacteria; Bacteroidetes; Flavobacteriia; Flavobacteriales; Flavobacteriaceae; Maritimimonas; uncultured bacterium
438	0	0	0	0	0	0	0	0	0	0	0	0	0	0	0	0	0	0	1	0	0	0	0	0	0	0	Bacteria; Bacteroidetes; Flavobacteriia; Flavobacteriales; Flavobacteriaceae; Meridianimaribacter; Meridianimaribacter flavus
439	20	16	16	3	5	3	0	9	0	0	0	2	0	133	106	75	4	17	6	91	46	14	0	0	3	0	Bacteria; Bacteroidetes; Flavobacteriia; Flavobacteriales; Flavobacteriaceae; Mesoflavibacter; marine bacterium SCRIPPS_413
440	0	0	0	0	0	0	0	0	0	0	0	0	0	0	0	0	0	6	0	36	0	0	0	0	0	0	Bacteria; Bacteroidetes; Flavobacteriia; Flavobacteriales; Flavobacteriaceae; Mesoflavibacter; marine bacterium SCRIPPS_413
441	0	0	0	0	0	0	0	0	0	0	0	0	0	0	0	0	0	0	0	0	1	0	0	0	0	0	Bacteria; Bacteroidetes; Flavobacteriia; Flavobacteriales; Flavobacteriaceae; Mesoflavibacter; uncultured bacterium
442	0	0	0	0	0	0	0	0	0	0	0	0	0	0	0	0	1	0	0	0	0	0	0	0	0	0	Bacteria; Bacteroidetes; Flavobacteriia; Flavobacteriales; Flavobacteriaceae; Nonlabens; bacterium DG976
443	0	0	0	0	0	0	0	0	0	0	0	0	0	0	2	0	0	0	0	0	0	0	0	0	0	0	Bacteria; Bacteroidetes; Flavobacteriia; Flavobacteriales; Flavobacteriaceae; Nonlabens; Nonlabens dokdonensis
444	0	0	0	0	0	0	0	0	0	0	0	0	0	6	4	0	0	0	0	0	0	0	0	0	0	0	Bacteria; Bacteroidetes; Flavobacteriia; Flavobacteriales; Flavobacteriaceae; Nonlabens; Nonlabens ulvanivorans
445	0	0	0	0	0	0	0	0	0	0	0	0	0	0	0	0	0	0	0	0	0	0	0	1	0	0	Bacteria; Bacteroidetes; Flavobacteriia; Flavobacteriales; Flavobacteriaceae; NS2b marine group; Flavobacteriaceae bacterium KMM 6332
446	0	0	0	0	0	0	0	0	0	0	0	0	0	0	0	0	0	0	0	0	0	0	0	1	0	0	Bacteria; Bacteroidetes; Flavobacteriia; Flavobacteriales; Flavobacteriaceae; NS2b marine group; Flavobacteriaceae bacterium KMM 6332
447	0	0	18	187	95	92	19	73	225	126	165	123	155	0	0	11	9	238	452	282	151	254	137	334	143	79	Bacteria; Bacteroidetes; Flavobacteriia; Flavobacteriales; Flavobacteriaceae; NS2b marine group; uncultured marine bacterium
448	0	0	0	0	0	0	0	0	0	0	0	0	0	0	0	0	0	0	0	0	0	0	0	0	1	0	Bacteria; Bacteroidetes; Flavobacteriia; Flavobacteriales; Flavobacteriaceae; NS2b marine group; uncultured marine bacterium
449	0	0	0	0	0	0	0	0	0	0	0	0	0	0	0	0	0	0	0	0	0	0	1	0	0	0	Bacteria; Bacteroidetes; Flavobacteriia; Flavobacteriales; Flavobacteriaceae; NS2b marine group; uncultured marine bacterium
450	0	0	0	0	0	0	0	0	0	0	0	0	0	0	0	0	0	0	0	1	0	0	0	0	0	0	Bacteria; Bacteroidetes; Flavobacteriia; Flavobacteriales; Flavobacteriaceae; NS2b marine group; uncultured marine bacterium
451	0	0	0	0	0	0	0	0	0	0	0	0	0	0	0	0	0	0	0	0	0	0	4	0	0	2	Bacteria; Bacteroidetes; Flavobacteriia; Flavobacteriales; Flavobacteriaceae; NS2b marine group; uncultured marine bacterium
452	0	0	0	0	0	0	0	0	0	0	0	0	0	0	1	0	0	0	0	0	0	0	0	0	0	0	Bacteria; Bacteroidetes; Flavobacteriia; Flavobacteriales; Flavobacteriaceae; NS2b marine group; uncultured marine bacterium
453	0	0	0	0	0	0	0	0	0	0	0	0	0	0	0	0	0	0	0	0	0	1	0	0	0	1	Bacteria; Bacteroidetes; Flavobacteriia; Flavobacteriales; Flavobacteriaceae; NS2b marine group; uncultured marine bacterium
454	0	0	0	0	0	0	0	0	0	0	0	0	0	0	0	4	0	0	0	0	0	0	0	0	0	0	Bacteria; Bacteroidetes; Flavobacteriia; Flavobacteriales; Flavobacteriaceae; NS2b marine group; uncultured marine bacterium
455	0	0	0	0	0	0	0	0	0	0	0	0	0	4	0	0	0	0	0	0	0	0	0	0	0	0	Bacteria; Bacteroidetes; Flavobacteriia; Flavobacteriales; Flavobacteriaceae; NS2b marine group; uncultured marine bacterium
456	0	0	0	0	0	0	0	0	0	0	0	0	0	0	0	0	0	0	1	0	0	0	0	0	0	0	Bacteria; Bacteroidetes; Flavobacteriia; Flavobacteriales; Flavobacteriaceae; NS2b marine group; uncultured marine bacterium
457	0	0	0	0	0	0	0	0	0	0	0	0	0	0	0	0	0	0	0	0	0	6	0	0	0	0	Bacteria; Bacteroidetes; Flavobacteriia; Flavobacteriales; Flavobacteriaceae; NS2b marine group; uncultured marine bacterium
458	0	0	0	0	0	0	0	0	0	0	0	0	0	0	0	0	0	0	0	0	0	0	1	0	0	0	Bacteria; Bacteroidetes; Flavobacteriia; Flavobacteriales; Flavobacteriaceae; NS2b marine group; uncultured marine bacterium
459	1	0	0	0	2	2	3	10	4	39	4	12	0	0	0	0	0	0	0	10	3	4	9	0	0	0	Bacteria; Bacteroidetes; Flavobacteriia; Flavobacteriales; Flavobacteriaceae; NS3a marine group; uncultured Bacteroidetes bacterium
460	0	0	0	0	0	0	0	0	0	0	0	0	0	0	0	0	0	0	0	0	0	0	5	0	0	0	Bacteria; Bacteroidetes; Flavobacteriia; Flavobacteriales; Flavobacteriaceae; NS3a marine group; uncultured Flavobacteriaceae bacterium
461	0	0	0	0	0	0	0	0	0	0	0	0	0	0	0	0	0	0	0	0	0	0	0	0	1	0	Bacteria; Bacteroidetes; Flavobacteriia; Flavobacteriales; Flavobacteriaceae; NS4 marine group; marine metagenome
462	0	0	0	0	0	0	0	0	0	0	0	0	0	0	0	0	0	1	0	0	0	0	0	0	0	0	Bacteria; Bacteroidetes; Flavobacteriia; Flavobacteriales; Flavobacteriaceae; NS4 marine group; uncultured bacterium
463	0	0	0	0	0	0	0	0	0	0	0	0	0	0	0	0	0	0	0	0	0	2	0	0	0	0	Bacteria; Bacteroidetes; Flavobacteriia; Flavobacteriales; Flavobacteriaceae; NS4 marine group; uncultured bacterium
464	0	0	0	0	0	0	0	0	0	0	0	0	0	0	0	0	0	0	0	22	0	0	0	0	0	0	Bacteria; Bacteroidetes; Flavobacteriia; Flavobacteriales; Flavobacteriaceae; NS4 marine group; uncultured bacterium
465	0	5	0	0	0	0	9	0	0	80	75	0	6	0	0	0	0	0	0	0	0	0	0	0	0	0	Bacteria; Bacteroidetes; Flavobacteriia; Flavobacteriales; Flavobacteriaceae; NS4 marine group; uncultured bacterium
466	0	0	0	0	0	0	0	0	0	0	0	0	0	0	0	0	0	0	0	0	0	0	2	0	0	0	Bacteria; Bacteroidetes; Flavobacteriia; Flavobacteriales; Flavobacteriaceae; NS4 marine group; uncultured bacterium
467	0	0	0	0	0	0	0	0	0	0	0	0	0	0	0	0	0	0	0	0	19	0	0	0	0	0	Bacteria; Bacteroidetes; Flavobacteriia; Flavobacteriales; Flavobacteriaceae; NS4 marine group; uncultured bacterium
468	0	0	0	0	0	0	0	0	0	0	0	0	0	0	0	0	0	0	6	0	0	0	0	0	0	0	Bacteria; Bacteroidetes; Flavobacteriia; Flavobacteriales; Flavobacteriaceae; NS4 marine group; uncultured bacterium
469	0	0	0	0	0	0	0	0	0	0	0	0	0	0	0	0	0	0	0	1	0	0	0	0	0	0	Bacteria; Bacteroidetes; Flavobacteriia; Flavobacteriales; Flavobacteriaceae; NS4 marine group; uncultured bacterium
470	0	0	0	90	24	20	0	25	61	8	54	49	138	0	0	0	0	18	129	119	0	99	0	0	83	37	Bacteria; Bacteroidetes; Flavobacteriia; Flavobacteriales; Flavobacteriaceae; NS4 marine group; uncultured bacterium
471	0	0	0	0	0	0	0	0	0	0	0	0	0	0	0	0	0	0	0	0	0	0	0	0	1	0	Bacteria; Bacteroidetes; Flavobacteriia; Flavobacteriales; Flavobacteriaceae; NS4 marine group; uncultured bacterium
472	0	0	0	0	0	0	0	0	0	0	0	0	0	0	0	0	0	0	0	0	0	0	0	0	1	0	Bacteria; Bacteroidetes; Flavobacteriia; Flavobacteriales; Flavobacteriaceae; NS4 marine group; uncultured bacterium
473	0	0	0	0	0	0	0	0	0	0	0	0	0	0	0	0	0	0	0	0	0	0	1	0	0	0	Bacteria; Bacteroidetes; Flavobacteriia; Flavobacteriales; Flavobacteriaceae; NS4 marine group; uncultured bacterium
474	0	0	0	0	0	0	0	0	0	0	0	0	0	0	0	0	0	0	1	0	0	0	0	0	0	0	Bacteria; Bacteroidetes; Flavobacteriia; Flavobacteriales; Flavobacteriaceae; NS4 marine group; uncultured bacterium
475	0	0	0	0	0	0	0	0	0	0	0	0	0	0	0	0	0	0	0	0	0	0	0	0	3	0	Bacteria; Bacteroidetes; Flavobacteriia; Flavobacteriales; Flavobacteriaceae; NS4 marine group; uncultured bacterium
476	1	0	0	0	0	0	0	0	0	0	0	0	0	0	0	0	0	0	0	0	0	0	0	0	0	0	Bacteria; Bacteroidetes; Flavobacteriia; Flavobacteriales; Flavobacteriaceae; NS4 marine group; uncultured bacterium
477	0	0	0	0	0	0	0	0	0	0	0	0	0	0	0	0	0	0	0	0	0	48	0	0	0	0	Bacteria; Bacteroidetes; Flavobacteriia; Flavobacteriales; Flavobacteriaceae; NS4 marine group; uncultured bacterium
478	0	0	0	0	0	0	0	0	0	0	0	0	0	0	1	0	0	0	0	0	0	0	0	0	0	0	Bacteria; Bacteroidetes; Flavobacteriia; Flavobacteriales; Flavobacteriaceae; NS4 marine group; uncultured bacterium
479	0	0	0	0	0	0	0	0	0	0	0	0	0	0	0	0	0	0	0	1	0	0	0	0	0	0	Bacteria; Bacteroidetes; Flavobacteriia; Flavobacteriales; Flavobacteriaceae; NS4 marine group; uncultured bacterium
480	0	0	0	0	0	0	0	0	0	0	0	0	0	8	0	0	0	0	0	0	0	0	0	0	0	0	Bacteria; Bacteroidetes; Flavobacteriia; Flavobacteriales; Flavobacteriaceae; NS4 marine group; uncultured bacterium
481	0	0	0	0	0	0	0	0	0	0	0	0	0	0	0	2	4	11	3	0	0	1	0	0	0	0	Bacteria; Bacteroidetes; Flavobacteriia; Flavobacteriales; Flavobacteriaceae; NS4 marine group; uncultured bacterium
482	0	0	0	0	0	0	0	0	0	0	0	0	0	0	0	0	0	0	4	0	0	1	0	1	0	0	Bacteria; Bacteroidetes; Flavobacteriia; Flavobacteriales; Flavobacteriaceae; NS4 marine group; uncultured bacterium
483	0	0	0	0	0	0	0	0	0	0	0	0	0	0	0	0	0	0	0	0	1	0	0	0	0	0	Bacteria; Bacteroidetes; Flavobacteriia; Flavobacteriales; Flavobacteriaceae; NS4 marine group; uncultured bacterium
484	0	0	0	0	0	0	0	0	0	0	0	0	0	0	0	0	0	0	0	0	0	0	0	0	0	1	Bacteria; Bacteroidetes; Flavobacteriia; Flavobacteriales; Flavobacteriaceae; NS4 marine group; uncultured bacterium
485	0	0	0	0	0	0	0	0	0	0	0	0	0	0	0	0	0	0	0	0	0	0	1	0	0	0	Bacteria; Bacteroidetes; Flavobacteriia; Flavobacteriales; Flavobacteriaceae; NS4 marine group; uncultured bacterium
486	0	0	0	0	0	0	0	0	0	0	0	0	0	0	0	0	0	0	0	0	0	0	0	0	1	0	Bacteria; Bacteroidetes; Flavobacteriia; Flavobacteriales; Flavobacteriaceae; NS4 marine group; uncultured bacterium
487	0	0	0	0	0	0	0	0	0	0	0	0	0	0	0	0	0	0	0	0	1	0	0	0	0	0	Bacteria; Bacteroidetes; Flavobacteriia; Flavobacteriales; Flavobacteriaceae; NS4 marine group; uncultured bacterium
488	0	0	0	0	0	0	0	0	0	0	0	0	0	0	0	0	0	0	0	0	0	0	0	0	0	1	Bacteria; Bacteroidetes; Flavobacteriia; Flavobacteriales; Flavobacteriaceae; NS4 marine group; uncultured bacterium
489	0	0	0	0	0	0	0	0	0	0	0	0	0	0	0	0	0	0	11	0	0	0	0	0	0	0	Bacteria; Bacteroidetes; Flavobacteriia; Flavobacteriales; Flavobacteriaceae; NS4 marine group; uncultured bacterium
490	0	0	0	0	0	0	0	0	0	0	0	0	0	0	0	0	0	0	0	0	0	0	1	0	0	0	Bacteria; Bacteroidetes; Flavobacteriia; Flavobacteriales; Flavobacteriaceae; NS4 marine group; uncultured bacterium
491	0	0	0	0	0	0	1	0	0	0	0	0	0	0	0	0	0	0	0	0	0	0	0	0	0	0	Bacteria; Bacteroidetes; Flavobacteriia; Flavobacteriales; Flavobacteriaceae; NS4 marine group; uncultured bacterium
492	0	0	0	0	0	0	0	0	0	0	0	0	0	0	0	0	0	0	0	0	0	0	0	0	0	1	Bacteria; Bacteroidetes; Flavobacteriia; Flavobacteriales; Flavobacteriaceae; NS4 marine group; uncultured bacterium
493	0	0	0	0	0	0	0	0	0	0	0	0	0	0	0	0	0	0	0	0	9	0	0	0	0	0	Bacteria; Bacteroidetes; Flavobacteriia; Flavobacteriales; Flavobacteriaceae; NS4 marine group; uncultured bacterium
494	0	0	0	0	0	0	0	0	0	0	0	0	0	0	0	0	0	0	0	1	0	0	0	0	0	0	Bacteria; Bacteroidetes; Flavobacteriia; Flavobacteriales; Flavobacteriaceae; NS4 marine group; uncultured bacterium
495	0	0	0	0	0	0	0	0	0	0	0	0	0	0	0	0	0	0	0	0	0	0	0	0	0	1	Bacteria; Bacteroidetes; Flavobacteriia; Flavobacteriales; Flavobacteriaceae; NS4 marine group; uncultured bacterium
496	0	0	0	0	0	0	0	0	0	0	0	0	0	0	0	0	0	0	0	0	0	0	1	0	0	0	Bacteria; Bacteroidetes; Flavobacteriia; Flavobacteriales; Flavobacteriaceae; NS4 marine group; uncultured bacterium
497	0	0	0	0	0	0	0	0	0	0	0	0	0	0	0	0	0	1	0	0	0	0	0	0	0	0	Bacteria; Bacteroidetes; Flavobacteriia; Flavobacteriales; Flavobacteriaceae; NS4 marine group; uncultured Bacteroidetes bacterium
498	0	0	0	0	0	0	0	0	0	0	0	0	0	0	0	0	0	0	0	0	0	0	1	0	0	0	Bacteria; Bacteroidetes; Flavobacteriia; Flavobacteriales; Flavobacteriaceae; NS4 marine group; uncultured Bacteroidetes bacterium
499	0	0	0	0	0	0	0	0	0	0	0	0	0	0	0	0	0	0	1	0	0	0	0	0	0	0	Bacteria; Bacteroidetes; Flavobacteriia; Flavobacteriales; Flavobacteriaceae; NS4 marine group; uncultured Bacteroidetes bacterium
500	0	0	0	0	0	0	0	0	0	0	0	0	0	0	0	0	0	0	0	0	0	0	1	0	0	0	Bacteria; Bacteroidetes; Flavobacteriia; Flavobacteriales; Flavobacteriaceae; NS4 marine group; uncultured Bacteroidetes bacterium
501	0	0	0	0	0	0	0	0	0	0	0	0	0	0	0	0	0	1	0	0	0	0	0	0	0	0	Bacteria; Bacteroidetes; Flavobacteriia; Flavobacteriales; Flavobacteriaceae; NS4 marine group; uncultured Bacteroidetes bacterium
502	137	67	205	0	29	152	21	207	0	5	0	0	0	114	25	199	42	105	463	271	501	117	0	0	26	0	Bacteria; Bacteroidetes; Flavobacteriia; Flavobacteriales; Flavobacteriaceae; NS4 marine group; uncultured Bacteroidetes bacterium
503	8	2	0	2	74	79	31	56	141	48	5	63	4	7	0	9	0	0	42	62	1	11	30	0	0	0	Bacteria; Bacteroidetes; Flavobacteriia; Flavobacteriales; Flavobacteriaceae; NS4 marine group; uncultured Bacteroidetes bacterium
504	0	0	0	0	0	0	0	0	0	0	0	0	0	0	0	0	0	9	0	0	0	0	0	0	0	0	Bacteria; Bacteroidetes; Flavobacteriia; Flavobacteriales; Flavobacteriaceae; NS4 marine group; uncultured Bacteroidetes bacterium
505	0	0	0	0	0	12	0	0	0	0	0	0	0	0	0	0	0	0	0	0	0	0	33	0	0	10	Bacteria; Bacteroidetes; Flavobacteriia; Flavobacteriales; Flavobacteriaceae; NS4 marine group; uncultured Bacteroidetes bacterium
506	0	0	0	0	0	0	0	0	0	0	0	0	0	0	0	0	0	0	0	74	0	0	0	0	0	0	Bacteria; Bacteroidetes; Flavobacteriia; Flavobacteriales; Flavobacteriaceae; NS4 marine group; uncultured Bacteroidetes bacterium
507	0	3	11	312	161	37	0	46	263	500	89	185	325	0	0	0	0	171	157	58	49	256	429	141	163	78	Bacteria; Bacteroidetes; Flavobacteriia; Flavobacteriales; Flavobacteriaceae; NS4 marine group; uncultured Bacteroidetes bacterium
508	0	0	0	0	0	0	0	0	0	0	0	0	0	0	0	0	0	0	0	0	0	3	1	0	0	0	Bacteria; Bacteroidetes; Flavobacteriia; Flavobacteriales; Flavobacteriaceae; NS4 marine group; uncultured Bacteroidetes bacterium
509	0	0	0	0	0	0	0	0	0	0	0	0	0	0	0	0	0	1	0	0	0	0	0	0	0	0	Bacteria; Bacteroidetes; Flavobacteriia; Flavobacteriales; Flavobacteriaceae; NS4 marine group; uncultured Bacteroidetes bacterium
510	0	0	0	0	0	0	0	0	0	0	0	0	0	0	0	0	0	0	3	0	0	0	0	0	0	0	Bacteria; Bacteroidetes; Flavobacteriia; Flavobacteriales; Flavobacteriaceae; NS4 marine group; uncultured Bacteroidetes bacterium
511	0	0	0	0	0	0	0	0	0	0	0	0	0	0	0	0	0	1	0	0	0	0	0	0	0	0	Bacteria; Bacteroidetes; Flavobacteriia; Flavobacteriales; Flavobacteriaceae; NS4 marine group; uncultured Bacteroidetes bacterium
512	0	3	0	0	0	0	0	0	7	2	0	9	0	0	0	0	0	0	0	0	0	1	0	0	0	0	Bacteria; Bacteroidetes; Flavobacteriia; Flavobacteriales; Flavobacteriaceae; NS4 marine group; uncultured Bacteroidetes bacterium
513	0	0	0	0	0	0	0	0	0	0	0	0	0	0	0	0	0	0	0	0	0	4	0	0	0	0	Bacteria; Bacteroidetes; Flavobacteriia; Flavobacteriales; Flavobacteriaceae; NS4 marine group; uncultured Bacteroidetes/Chlorobi group bacterium
514	0	0	0	0	0	0	0	0	0	0	0	0	0	0	0	0	0	0	1	0	0	0	0	0	0	0	Bacteria; Bacteroidetes; Flavobacteriia; Flavobacteriales; Flavobacteriaceae; NS4 marine group; uncultured Flavobacteriaceae bacterium
515	0	0	0	0	0	1	0	0	0	0	0	0	0	0	0	0	0	0	0	0	0	0	0	0	0	0	Bacteria; Bacteroidetes; Flavobacteriia; Flavobacteriales; Flavobacteriaceae; NS4 marine group; uncultured Flavobacteriaceae bacterium
516	0	0	0	0	0	0	0	0	0	0	0	0	0	4	0	0	0	0	0	0	0	0	0	0	0	0	Bacteria; Bacteroidetes; Flavobacteriia; Flavobacteriales; Flavobacteriaceae; NS4 marine group; uncultured Flavobacteriaceae bacterium
517	0	0	0	0	0	0	0	0	0	0	0	0	0	0	0	0	0	0	0	0	1	0	0	0	0	0	Bacteria; Bacteroidetes; Flavobacteriia; Flavobacteriales; Flavobacteriaceae; NS4 marine group; uncultured Flavobacteriaceae bacterium
518	0	0	0	0	0	0	0	0	0	0	0	0	0	0	0	0	0	9	0	0	0	0	0	0	0	0	Bacteria; Bacteroidetes; Flavobacteriia; Flavobacteriales; Flavobacteriaceae; NS4 marine group; uncultured Flavobacteriaceae bacterium
519	0	0	0	0	0	0	0	0	0	0	0	0	0	0	0	0	0	0	0	1	0	0	0	0	0	0	Bacteria; Bacteroidetes; Flavobacteriia; Flavobacteriales; Flavobacteriaceae; NS4 marine group; uncultured Flavobacteriaceae bacterium
520	0	0	0	0	0	0	0	0	0	0	0	0	0	0	0	0	0	0	8	0	0	0	0	0	0	0	Bacteria; Bacteroidetes; Flavobacteriia; Flavobacteriales; Flavobacteriaceae; NS4 marine group; uncultured Flavobacteriaceae bacterium
521	0	0	0	0	0	0	0	0	0	0	0	0	0	0	0	0	0	0	0	1	0	0	0	0	0	0	Bacteria; Bacteroidetes; Flavobacteriia; Flavobacteriales; Flavobacteriaceae; NS4 marine group; uncultured Flavobacteriia bacterium
522	0	0	0	114	0	16	12	0	3	90	70	11	44	0	0	0	0	0	0	0	0	0	0	0	1	12	Bacteria; Bacteroidetes; Flavobacteriia; Flavobacteriales; Flavobacteriaceae; NS4 marine group; uncultured Flavobacteriia bacterium
523	37	25	96	136	87	174	98	321	36	76	72	96	110	33	0	122	35	169	739	618	718	35	204	284	94	107	Bacteria; Bacteroidetes; Flavobacteriia; Flavobacteriales; Flavobacteriaceae; NS4 marine group; uncultured marine bacterium
524	0	0	0	0	0	0	0	0	0	0	0	0	0	0	2	0	0	12	0	0	0	0	0	0	0	0	Bacteria; Bacteroidetes; Flavobacteriia; Flavobacteriales; Flavobacteriaceae; NS4 marine group; uncultured marine bacterium
525	0	0	0	0	0	0	0	0	0	0	0	0	0	0	0	0	0	0	0	0	6	0	0	0	0	0	Bacteria; Bacteroidetes; Flavobacteriia; Flavobacteriales; Flavobacteriaceae; NS4 marine group; uncultured marine bacterium
526	0	0	0	0	0	0	0	0	0	0	0	0	0	0	0	0	0	0	0	0	0	0	0	1	0	0	Bacteria; Bacteroidetes; Flavobacteriia; Flavobacteriales; Flavobacteriaceae; NS4 marine group; uncultured marine bacterium
527	0	0	0	0	0	0	0	0	0	0	0	0	0	0	0	0	0	0	0	0	17	0	0	0	4	0	Bacteria; Bacteroidetes; Flavobacteriia; Flavobacteriales; Flavobacteriaceae; NS4 marine group; uncultured marine bacterium
528	0	0	0	0	0	0	0	0	0	0	0	0	0	0	0	0	0	0	0	76	0	0	0	0	0	0	Bacteria; Bacteroidetes; Flavobacteriia; Flavobacteriales; Flavobacteriaceae; NS4 marine group; uncultured marine bacterium
529	0	0	0	0	0	0	0	0	0	0	0	0	0	0	0	0	0	0	8	0	0	0	0	0	0	0	Bacteria; Bacteroidetes; Flavobacteriia; Flavobacteriales; Flavobacteriaceae; NS4 marine group; uncultured marine bacterium
530	0	0	0	0	0	0	0	0	0	11	0	0	0	0	0	0	0	0	0	0	0	0	0	0	0	0	Bacteria; Bacteroidetes; Flavobacteriia; Flavobacteriales; Flavobacteriaceae; NS4 marine group; uncultured marine bacterium
531	0	0	0	0	0	0	0	0	0	0	0	0	0	0	0	0	0	0	0	0	0	5	0	0	0	0	Bacteria; Bacteroidetes; Flavobacteriia; Flavobacteriales; Flavobacteriaceae; NS4 marine group; uncultured marine microorganism
532	0	0	0	0	0	13	0	0	0	0	0	0	0	0	0	0	0	0	0	21	0	0	1	0	0	0	Bacteria; Bacteroidetes; Flavobacteriia; Flavobacteriales; Flavobacteriaceae; NS4 marine group; unidentified marine bacterioplankton
533	0	0	0	0	0	0	0	0	0	0	0	0	0	0	0	0	0	0	0	0	0	1	0	0	0	0	Bacteria; Bacteroidetes; Flavobacteriia; Flavobacteriales; Flavobacteriaceae; NS4 marine group; unidentified marine bacterioplankton
534	0	0	0	0	0	0	0	0	0	0	0	0	0	0	0	0	0	0	0	0	0	0	1	0	0	0	Bacteria; Bacteroidetes; Flavobacteriia; Flavobacteriales; Flavobacteriaceae; NS4 marine group; unidentified marine bacterioplankton
535	0	38	0	49	0	0	6	0	31	15	26	77	51	0	0	0	0	19	0	0	0	0	1	0	0	0	Bacteria; Bacteroidetes; Flavobacteriia; Flavobacteriales; Flavobacteriaceae; NS5 marine group; uncultured bacterium
536	190	11	393	10	80	68	17	70	174	139	29	15	0	196	30	399	0	157	140	166	228	184	150	116	135	39	Bacteria; Bacteroidetes; Flavobacteriia; Flavobacteriales; Flavobacteriaceae; NS5 marine group; uncultured bacterium
537	0	0	0	6	0	0	0	0	0	0	0	0	0	0	0	0	0	0	0	0	0	0	0	0	0	3	Bacteria; Bacteroidetes; Flavobacteriia; Flavobacteriales; Flavobacteriaceae; NS5 marine group; uncultured bacterium
538	0	0	0	0	0	0	0	0	0	0	0	0	0	0	0	0	0	0	0	0	0	2	0	0	0	0	Bacteria; Bacteroidetes; Flavobacteriia; Flavobacteriales; Flavobacteriaceae; NS5 marine group; uncultured bacterium
539	0	0	0	0	0	0	0	0	0	0	0	0	0	0	0	0	0	0	0	0	0	2	0	0	0	0	Bacteria; Bacteroidetes; Flavobacteriia; Flavobacteriales; Flavobacteriaceae; NS5 marine group; uncultured bacterium
540	0	15	0	45	0	0	0	0	2	7	46	0	109	0	0	0	0	4	0	0	0	0	0	0	0	0	Bacteria; Bacteroidetes; Flavobacteriia; Flavobacteriales; Flavobacteriaceae; NS5 marine group; uncultured bacterium
541	1346	1359	1855	194	69	425	122	487	247	150	165	157	212	1273	45	910	38	331	966	857	526	318	103	302	140	54	Bacteria; Bacteroidetes; Flavobacteriia; Flavobacteriales; Flavobacteriaceae; NS5 marine group; uncultured bacterium
542	0	0	0	0	0	0	0	0	0	0	0	0	0	0	0	0	0	0	0	32	0	0	0	0	0	0	Bacteria; Bacteroidetes; Flavobacteriia; Flavobacteriales; Flavobacteriaceae; NS5 marine group; uncultured bacterium
543	0	0	0	0	0	0	0	0	0	0	0	0	0	0	0	0	0	0	0	0	0	0	0	0	0	1	Bacteria; Bacteroidetes; Flavobacteriia; Flavobacteriales; Flavobacteriaceae; NS5 marine group; uncultured bacterium
544	0	0	0	0	0	0	0	0	0	0	0	0	0	0	0	0	0	0	13	0	0	0	0	0	0	0	Bacteria; Bacteroidetes; Flavobacteriia; Flavobacteriales; Flavobacteriaceae; NS5 marine group; uncultured bacterium
545	0	0	0	0	0	0	0	0	0	0	0	0	0	0	0	0	0	0	0	1	0	0	0	0	0	0	Bacteria; Bacteroidetes; Flavobacteriia; Flavobacteriales; Flavobacteriaceae; NS5 marine group; uncultured bacterium
546	0	0	0	21	0	51	0	0	0	21	6	0	0	0	0	0	0	0	0	0	0	0	0	0	0	0	Bacteria; Bacteroidetes; Flavobacteriia; Flavobacteriales; Flavobacteriaceae; NS5 marine group; uncultured bacterium
547	0	0	0	0	0	0	0	0	0	0	0	0	0	0	0	0	0	0	0	0	0	0	0	0	0	1	Bacteria; Bacteroidetes; Flavobacteriia; Flavobacteriales; Flavobacteriaceae; NS5 marine group; uncultured bacterium
548	0	0	0	0	0	0	0	0	0	0	0	0	0	0	0	0	0	0	0	0	0	1	0	0	0	0	Bacteria; Bacteroidetes; Flavobacteriia; Flavobacteriales; Flavobacteriaceae; NS5 marine group; uncultured bacterium
549	0	0	0	0	0	0	0	0	0	0	0	0	0	9	0	0	0	0	0	0	0	0	0	0	0	0	Bacteria; Bacteroidetes; Flavobacteriia; Flavobacteriales; Flavobacteriaceae; NS5 marine group; uncultured bacterium
550	0	0	0	0	0	0	0	0	0	0	0	0	0	10	0	11	5	0	0	1	0	0	0	0	0	0	Bacteria; Bacteroidetes; Flavobacteriia; Flavobacteriales; Flavobacteriaceae; NS5 marine group; uncultured bacterium
551	0	0	0	0	0	0	0	0	0	0	0	0	0	0	0	0	0	0	0	0	0	0	1	0	0	0	Bacteria; Bacteroidetes; Flavobacteriia; Flavobacteriales; Flavobacteriaceae; NS5 marine group; uncultured bacterium
552	0	0	0	0	0	0	0	0	0	0	0	0	0	0	0	0	0	0	0	0	0	0	0	0	1	0	Bacteria; Bacteroidetes; Flavobacteriia; Flavobacteriales; Flavobacteriaceae; NS5 marine group; uncultured bacterium
553	0	0	0	0	0	0	0	0	0	0	0	0	0	0	0	0	0	0	0	1	0	0	0	0	0	0	Bacteria; Bacteroidetes; Flavobacteriia; Flavobacteriales; Flavobacteriaceae; NS5 marine group; uncultured bacterium
554	7	0	0	0	0	0	0	0	0	0	0	0	0	0	0	0	0	0	0	0	0	0	0	0	0	0	Bacteria; Bacteroidetes; Flavobacteriia; Flavobacteriales; Flavobacteriaceae; NS5 marine group; uncultured bacterium
555	0	0	0	0	0	0	0	0	0	0	0	0	0	0	0	0	0	0	0	0	0	0	1	0	0	0	Bacteria; Bacteroidetes; Flavobacteriia; Flavobacteriales; Flavobacteriaceae; NS5 marine group; uncultured bacterium
556	0	0	0	0	0	0	0	0	0	0	0	0	0	0	0	0	0	0	0	0	0	0	0	1	0	0	Bacteria; Bacteroidetes; Flavobacteriia; Flavobacteriales; Flavobacteriaceae; NS5 marine group; uncultured bacterium
557	0	0	0	0	0	0	0	0	0	0	0	0	0	0	0	0	0	0	1	0	0	0	0	0	0	0	Bacteria; Bacteroidetes; Flavobacteriia; Flavobacteriales; Flavobacteriaceae; NS5 marine group; uncultured bacterium
558	0	0	0	0	0	0	0	0	0	0	6	0	2	0	0	0	0	0	0	0	0	18	0	0	0	0	Bacteria; Bacteroidetes; Flavobacteriia; Flavobacteriales; Flavobacteriaceae; NS5 marine group; uncultured bacterium
559	0	0	0	0	0	0	1	0	0	0	3	1	0	0	0	0	0	0	0	1	4	0	5	3	0	0	Bacteria; Bacteroidetes; Flavobacteriia; Flavobacteriales; Flavobacteriaceae; NS5 marine group; uncultured bacterium
560	0	0	0	0	0	0	0	0	0	0	0	0	0	0	0	0	0	0	0	0	0	0	1	0	0	0	Bacteria; Bacteroidetes; Flavobacteriia; Flavobacteriales; Flavobacteriaceae; NS5 marine group; uncultured bacterium
561	0	0	0	0	0	0	0	0	0	0	0	0	0	0	0	0	0	0	0	1	0	0	0	0	0	0	Bacteria; Bacteroidetes; Flavobacteriia; Flavobacteriales; Flavobacteriaceae; NS5 marine group; uncultured bacterium
562	0	8	0	11	0	27	0	0	9	8	7	7	0	0	0	0	0	0	7	0	0	0	0	0	15	1	Bacteria; Bacteroidetes; Flavobacteriia; Flavobacteriales; Flavobacteriaceae; NS5 marine group; uncultured bacterium
563	0	0	1	0	0	0	0	0	0	0	0	0	0	0	0	0	0	0	0	0	0	0	0	0	0	0	Bacteria; Bacteroidetes; Flavobacteriia; Flavobacteriales; Flavobacteriaceae; NS5 marine group; uncultured bacterium
564	0	0	0	0	0	0	0	0	0	0	0	0	0	0	0	0	0	0	0	0	0	0	0	1	0	0	Bacteria; Bacteroidetes; Flavobacteriia; Flavobacteriales; Flavobacteriaceae; NS5 marine group; uncultured bacterium
565	0	0	0	0	0	0	0	0	0	0	0	0	0	2	0	0	0	0	0	0	0	0	0	0	0	0	Bacteria; Bacteroidetes; Flavobacteriia; Flavobacteriales; Flavobacteriaceae; NS5 marine group; uncultured bacterium
566	0	0	0	0	0	0	0	0	0	0	0	0	0	0	0	0	0	8	0	0	0	0	0	0	0	0	Bacteria; Bacteroidetes; Flavobacteriia; Flavobacteriales; Flavobacteriaceae; NS5 marine group; uncultured bacterium
567	0	0	0	0	0	0	0	0	0	0	0	0	0	0	0	0	0	0	0	0	0	0	0	0	0	1	Bacteria; Bacteroidetes; Flavobacteriia; Flavobacteriales; Flavobacteriaceae; NS5 marine group; uncultured bacterium
568	0	0	0	0	0	0	0	0	0	0	0	0	0	0	0	0	0	16	0	0	0	0	0	0	0	1	Bacteria; Bacteroidetes; Flavobacteriia; Flavobacteriales; Flavobacteriaceae; NS5 marine group; uncultured bacterium
569	0	0	0	0	0	0	0	0	0	0	0	0	0	0	0	0	0	0	0	0	0	0	1	0	0	0	Bacteria; Bacteroidetes; Flavobacteriia; Flavobacteriales; Flavobacteriaceae; NS5 marine group; uncultured bacterium
570	0	0	0	0	0	0	0	0	0	0	0	0	0	0	0	0	0	0	0	1	0	0	0	0	0	0	Bacteria; Bacteroidetes; Flavobacteriia; Flavobacteriales; Flavobacteriaceae; NS5 marine group; uncultured bacterium
571	0	0	0	0	0	0	0	0	0	0	0	0	0	0	0	0	0	0	0	0	0	0	0	0	0	1	Bacteria; Bacteroidetes; Flavobacteriia; Flavobacteriales; Flavobacteriaceae; NS5 marine group; uncultured bacterium
572	0	0	0	0	0	0	0	0	0	0	0	0	0	0	0	0	0	0	0	0	0	0	1	0	0	0	Bacteria; Bacteroidetes; Flavobacteriia; Flavobacteriales; Flavobacteriaceae; NS5 marine group; uncultured bacterium
573	0	0	0	0	0	0	0	0	0	0	0	0	0	0	0	0	0	1	0	0	0	0	0	0	0	0	Bacteria; Bacteroidetes; Flavobacteriia; Flavobacteriales; Flavobacteriaceae; NS5 marine group; uncultured bacterium
574	0	0	0	36	0	1	1	0	2	0	5	2	49	0	0	0	0	0	4	4	0	0	0	3	0	12	Bacteria; Bacteroidetes; Flavobacteriia; Flavobacteriales; Flavobacteriaceae; NS5 marine group; uncultured bacterium
575	0	0	0	0	0	0	0	0	0	0	0	0	0	0	0	0	0	0	0	0	0	0	1	0	0	0	Bacteria; Bacteroidetes; Flavobacteriia; Flavobacteriales; Flavobacteriaceae; NS5 marine group; uncultured bacterium
576	0	0	0	0	0	0	0	0	0	0	0	0	0	0	0	0	0	0	0	0	0	0	1	0	0	0	Bacteria; Bacteroidetes; Flavobacteriia; Flavobacteriales; Flavobacteriaceae; NS5 marine group; uncultured bacterium
577	0	0	0	0	0	0	0	0	0	0	0	0	0	0	0	0	0	3	0	0	0	0	0	0	0	0	Bacteria; Bacteroidetes; Flavobacteriia; Flavobacteriales; Flavobacteriaceae; NS5 marine group; uncultured bacterium
578	0	0	0	0	0	0	0	0	0	0	0	0	0	0	0	0	0	0	0	1	0	0	0	0	0	0	Bacteria; Bacteroidetes; Flavobacteriia; Flavobacteriales; Flavobacteriaceae; NS5 marine group; uncultured bacterium
579	4	2	10	0	43	87	15	62	0	47	7	0	0	54	0	47	21	68	47	108	1	62	61	19	51	0	Bacteria; Bacteroidetes; Flavobacteriia; Flavobacteriales; Flavobacteriaceae; NS5 marine group; uncultured bacterium
580	0	0	0	0	0	0	0	8	0	0	0	0	0	0	0	0	0	9	0	0	0	0	0	0	8	0	Bacteria; Bacteroidetes; Flavobacteriia; Flavobacteriales; Flavobacteriaceae; NS5 marine group; uncultured bacterium
581	0	0	0	0	0	0	0	0	0	0	0	0	0	0	0	0	0	9	0	0	0	0	0	0	0	0	Bacteria; Bacteroidetes; Flavobacteriia; Flavobacteriales; Flavobacteriaceae; NS5 marine group; uncultured bacterium
582	0	0	0	0	0	0	0	0	0	0	0	0	0	0	0	0	0	0	0	0	0	0	0	0	13	0	Bacteria; Bacteroidetes; Flavobacteriia; Flavobacteriales; Flavobacteriaceae; NS5 marine group; uncultured bacterium
583	0	0	1	0	0	0	0	0	0	0	0	0	0	0	0	0	0	0	0	0	0	0	0	0	0	0	Bacteria; Bacteroidetes; Flavobacteriia; Flavobacteriales; Flavobacteriaceae; NS5 marine group; uncultured bacterium
584	0	0	0	0	0	0	0	0	0	0	0	0	0	0	0	0	0	0	0	0	0	0	1	0	0	0	Bacteria; Bacteroidetes; Flavobacteriia; Flavobacteriales; Flavobacteriaceae; NS5 marine group; uncultured bacterium
585	0	0	0	0	0	0	0	0	0	0	0	0	0	0	0	9	0	0	0	0	0	0	0	0	0	0	Bacteria; Bacteroidetes; Flavobacteriia; Flavobacteriales; Flavobacteriaceae; NS5 marine group; uncultured bacterium
586	17	26	114	3	39	148	41	101	55	68	10	52	0	11	0	76	8	4	160	177	69	34	11	0	19	0	Bacteria; Bacteroidetes; Flavobacteriia; Flavobacteriales; Flavobacteriaceae; NS5 marine group; uncultured bacterium
587	0	0	0	0	0	0	0	0	0	0	0	0	0	0	0	0	0	0	0	0	0	0	1	0	0	0	Bacteria; Bacteroidetes; Flavobacteriia; Flavobacteriales; Flavobacteriaceae; NS5 marine group; uncultured bacterium
588	0	0	0	0	0	0	0	0	0	0	0	0	0	0	0	0	0	0	0	0	0	3	0	0	0	0	Bacteria; Bacteroidetes; Flavobacteriia; Flavobacteriales; Flavobacteriaceae; NS5 marine group; uncultured bacterium
589	0	0	0	0	0	0	0	0	0	0	0	0	0	0	0	0	0	0	0	0	0	3	0	0	0	0	Bacteria; Bacteroidetes; Flavobacteriia; Flavobacteriales; Flavobacteriaceae; NS5 marine group; uncultured bacterium
590	0	0	0	0	0	0	0	0	43	27	0	0	0	0	0	0	0	0	0	0	0	0	0	0	0	0	Bacteria; Bacteroidetes; Flavobacteriia; Flavobacteriales; Flavobacteriaceae; NS5 marine group; uncultured bacterium
591	0	0	0	0	0	0	0	0	0	0	0	0	0	0	0	0	0	0	0	0	0	0	0	0	5	0	Bacteria; Bacteroidetes; Flavobacteriia; Flavobacteriales; Flavobacteriaceae; NS5 marine group; uncultured bacterium
592	0	0	0	0	0	0	0	0	0	0	0	0	0	0	0	0	0	1	0	0	0	0	0	0	0	0	Bacteria; Bacteroidetes; Flavobacteriia; Flavobacteriales; Flavobacteriaceae; NS5 marine group; uncultured bacterium
593	0	0	0	0	0	0	0	0	0	0	0	0	0	0	0	0	0	0	1	0	0	0	0	0	0	0	Bacteria; Bacteroidetes; Flavobacteriia; Flavobacteriales; Flavobacteriaceae; NS5 marine group; uncultured bacterium
594	0	4	0	19	33	107	30	81	33	13	11	52	82	0	0	34	0	37	87	49	81	28	0	0	27	19	Bacteria; Bacteroidetes; Flavobacteriia; Flavobacteriales; Flavobacteriaceae; NS5 marine group; uncultured bacterium
595	0	0	0	0	0	0	0	0	0	0	0	0	0	0	0	0	0	0	0	6	0	0	0	0	0	0	Bacteria; Bacteroidetes; Flavobacteriia; Flavobacteriales; Flavobacteriaceae; NS5 marine group; uncultured bacterium
596	0	0	0	0	0	0	0	0	0	0	0	0	0	0	0	1	0	0	0	0	0	0	0	0	0	0	Bacteria; Bacteroidetes; Flavobacteriia; Flavobacteriales; Flavobacteriaceae; NS5 marine group; uncultured bacterium
597	0	0	0	0	0	0	0	0	0	4	0	0	0	0	23	0	0	0	0	0	40	0	0	0	0	0	Bacteria; Bacteroidetes; Flavobacteriia; Flavobacteriales; Flavobacteriaceae; NS5 marine group; uncultured bacterium
598	0	0	0	0	0	0	0	0	0	0	0	0	0	0	0	0	0	0	1	0	0	0	0	0	0	0	Bacteria; Bacteroidetes; Flavobacteriia; Flavobacteriales; Flavobacteriaceae; NS5 marine group; uncultured bacterium
599	0	0	0	0	0	0	0	0	0	0	0	0	0	0	0	5	0	0	0	0	0	0	0	0	0	0	Bacteria; Bacteroidetes; Flavobacteriia; Flavobacteriales; Flavobacteriaceae; NS5 marine group; uncultured bacterium
600	0	0	0	0	0	0	0	0	0	0	1	0	0	0	0	0	0	0	0	0	0	0	0	0	0	0	Bacteria; Bacteroidetes; Flavobacteriia; Flavobacteriales; Flavobacteriaceae; NS5 marine group; uncultured bacterium
601	0	0	0	0	0	0	0	0	0	0	0	0	0	0	0	0	0	0	0	0	0	0	0	0	1	0	Bacteria; Bacteroidetes; Flavobacteriia; Flavobacteriales; Flavobacteriaceae; NS5 marine group; uncultured bacterium
602	0	0	0	380	0	0	0	0	38	10	31	8	439	0	0	0	0	0	0	0	0	0	0	18	5	84	Bacteria; Bacteroidetes; Flavobacteriia; Flavobacteriales; Flavobacteriaceae; NS5 marine group; uncultured bacterium
603	0	0	0	0	0	0	0	0	0	0	0	0	0	6	0	0	0	0	0	0	0	0	0	0	0	0	Bacteria; Bacteroidetes; Flavobacteriia; Flavobacteriales; Flavobacteriaceae; NS5 marine group; uncultured bacterium
604	0	0	0	0	0	0	0	0	0	0	0	0	0	0	0	0	0	0	0	0	0	0	0	1	0	0	Bacteria; Bacteroidetes; Flavobacteriia; Flavobacteriales; Flavobacteriaceae; NS5 marine group; uncultured bacterium
605	0	0	0	0	0	0	0	0	0	0	0	0	0	0	0	0	0	5	0	0	0	0	0	0	0	0	Bacteria; Bacteroidetes; Flavobacteriia; Flavobacteriales; Flavobacteriaceae; NS5 marine group; uncultured bacterium
606	0	0	0	0	0	0	0	0	0	0	0	0	0	11	0	0	0	0	0	0	0	0	0	0	0	0	Bacteria; Bacteroidetes; Flavobacteriia; Flavobacteriales; Flavobacteriaceae; NS5 marine group; uncultured bacterium
607	0	0	0	0	0	0	0	0	0	0	0	0	0	0	0	0	0	0	1	0	0	0	0	0	0	0	Bacteria; Bacteroidetes; Flavobacteriia; Flavobacteriales; Flavobacteriaceae; NS5 marine group; uncultured bacterium
608	0	0	0	0	0	0	0	0	0	0	0	0	0	0	0	0	0	0	0	0	0	1	0	0	0	0	Bacteria; Bacteroidetes; Flavobacteriia; Flavobacteriales; Flavobacteriaceae; NS5 marine group; uncultured bacterium
609	0	0	0	0	0	0	0	0	0	0	0	0	0	0	0	0	0	0	0	0	1	0	0	0	0	0	Bacteria; Bacteroidetes; Flavobacteriia; Flavobacteriales; Flavobacteriaceae; NS5 marine group; uncultured bacterium
610	0	0	0	0	0	0	0	0	0	0	0	0	0	0	0	0	0	0	10	0	0	0	0	0	0	0	Bacteria; Bacteroidetes; Flavobacteriia; Flavobacteriales; Flavobacteriaceae; NS5 marine group; uncultured bacterium
611	0	0	0	0	0	0	0	0	0	0	0	0	0	0	0	0	0	0	0	0	0	1	0	0	0	0	Bacteria; Bacteroidetes; Flavobacteriia; Flavobacteriales; Flavobacteriaceae; NS5 marine group; uncultured bacterium ARCTIC26_B_07
612	0	0	0	0	0	0	0	0	0	0	0	0	0	0	0	0	0	0	0	0	0	0	0	0	1	0	Bacteria; Bacteroidetes; Flavobacteriia; Flavobacteriales; Flavobacteriaceae; NS5 marine group; uncultured bacterium ARCTIC26_B_07
613	0	0	0	0	0	0	0	0	0	0	0	0	0	0	0	0	0	0	0	1	0	0	0	0	0	0	Bacteria; Bacteroidetes; Flavobacteriia; Flavobacteriales; Flavobacteriaceae; NS5 marine group; uncultured Bacteroidetes bacterium
614	75	12	24	54	166	119	39	96	273	168	44	108	0	0	0	10	6	68	176	110	52	34	18	0	63	58	Bacteria; Bacteroidetes; Flavobacteriia; Flavobacteriales; Flavobacteriaceae; NS5 marine group; uncultured Bacteroidetes bacterium
615	12	4	0	0	0	0	0	0	0	0	0	9	0	0	0	0	0	0	0	0	0	0	0	0	0	0	Bacteria; Bacteroidetes; Flavobacteriia; Flavobacteriales; Flavobacteriaceae; NS5 marine group; uncultured Bacteroidetes bacterium
616	0	0	0	5	0	0	0	0	0	0	0	0	0	0	0	0	0	0	0	0	0	0	12	0	7	0	Bacteria; Bacteroidetes; Flavobacteriia; Flavobacteriales; Flavobacteriaceae; NS5 marine group; uncultured Bacteroidetes bacterium
617	8	0	0	0	0	0	0	0	0	0	0	0	0	11	2	3	0	0	0	0	0	0	0	1	0	0	Bacteria; Bacteroidetes; Flavobacteriia; Flavobacteriales; Flavobacteriaceae; NS5 marine group; uncultured Bacteroidetes bacterium
618	0	0	0	0	0	0	0	0	0	30	0	0	0	0	0	0	0	0	0	0	0	0	0	0	0	0	Bacteria; Bacteroidetes; Flavobacteriia; Flavobacteriales; Flavobacteriaceae; NS5 marine group; uncultured Bacteroidetes/Chlorobi group bacterium
619	0	0	0	0	11	4	0	0	58	16	0	30	0	0	0	0	0	18	0	0	0	31	23	26	0	0	Bacteria; Bacteroidetes; Flavobacteriia; Flavobacteriales; Flavobacteriaceae; NS5 marine group; uncultured Bacteroidetes/Chlorobi group bacterium
620	0	0	0	0	0	0	0	0	0	0	0	0	0	0	0	7	0	0	0	0	0	0	0	0	0	0	Bacteria; Bacteroidetes; Flavobacteriia; Flavobacteriales; Flavobacteriaceae; NS5 marine group; uncultured Bacteroidetes/Chlorobi group bacterium
621	0	0	0	0	0	0	0	0	0	0	0	0	0	0	0	0	0	1	0	0	0	0	0	0	0	0	Bacteria; Bacteroidetes; Flavobacteriia; Flavobacteriales; Flavobacteriaceae; NS5 marine group; uncultured Flavobacteriaceae bacterium
622	0	0	0	0	0	0	0	0	0	0	0	0	0	0	0	7	0	0	0	0	0	0	0	0	0	0	Bacteria; Bacteroidetes; Flavobacteriia; Flavobacteriales; Flavobacteriaceae; NS5 marine group; uncultured Flavobacteriaceae bacterium
623	0	0	0	0	2	0	0	0	0	0	0	0	0	0	0	0	0	0	0	0	0	0	0	0	0	0	Bacteria; Bacteroidetes; Flavobacteriia; Flavobacteriales; Flavobacteriaceae; NS5 marine group; uncultured Flavobacteriaceae bacterium
624	0	14	0	4	0	22	0	0	0	0	0	0	0	0	0	0	0	0	0	0	0	0	0	0	0	0	Bacteria; Bacteroidetes; Flavobacteriia; Flavobacteriales; Flavobacteriaceae; NS5 marine group; uncultured Flavobacteriaceae bacterium
625	0	0	0	0	0	0	0	0	0	0	0	0	0	0	0	0	0	0	0	0	16	0	0	0	0	0	Bacteria; Bacteroidetes; Flavobacteriia; Flavobacteriales; Flavobacteriaceae; NS5 marine group; uncultured Flavobacteriaceae bacterium
626	0	0	0	0	0	0	0	0	0	0	0	0	12	4	0	0	0	0	0	0	0	0	0	0	0	0	Bacteria; Bacteroidetes; Flavobacteriia; Flavobacteriales; Flavobacteriaceae; NS5 marine group; uncultured Flavobacteriaceae bacterium
627	0	0	0	0	0	0	0	0	0	0	0	0	0	0	0	0	0	0	0	28	0	0	0	0	0	0	Bacteria; Bacteroidetes; Flavobacteriia; Flavobacteriales; Flavobacteriaceae; NS5 marine group; uncultured Flavobacteriaceae bacterium
628	0	0	0	0	0	0	0	0	0	0	0	0	4	0	0	0	0	0	0	0	0	0	0	0	0	0	Bacteria; Bacteroidetes; Flavobacteriia; Flavobacteriales; Flavobacteriaceae; NS5 marine group; uncultured Flavobacteriia bacterium
629	0	0	0	0	0	0	0	0	0	0	0	0	0	0	0	0	0	0	0	0	0	1	0	0	0	0	Bacteria; Bacteroidetes; Flavobacteriia; Flavobacteriales; Flavobacteriaceae; NS5 marine group; uncultured Flavobacteriia bacterium
630	16	125	186	64	0	19	0	32	0	0	0	0	0	0	0	56	8	5	11	30	0	0	0	0	0	0	Bacteria; Bacteroidetes; Flavobacteriia; Flavobacteriales; Flavobacteriaceae; NS5 marine group; uncultured Flavobacteriia bacterium
631	50	266	2040	0	13	45	34	123	3	9	4	9	0	36	11	635	29	0	111	106	99	9	0	0	5	0	Bacteria; Bacteroidetes; Flavobacteriia; Flavobacteriales; Flavobacteriaceae; NS5 marine group; uncultured Flavobacteriia bacterium
632	0	0	0	0	0	0	0	0	0	0	0	0	0	0	0	0	0	0	0	0	7	0	0	0	0	0	Bacteria; Bacteroidetes; Flavobacteriia; Flavobacteriales; Flavobacteriaceae; NS5 marine group; uncultured Flavobacteriia bacterium
633	0	0	0	0	0	0	0	0	0	0	0	0	0	1	0	0	0	0	0	0	0	0	0	0	0	0	Bacteria; Bacteroidetes; Flavobacteriia; Flavobacteriales; Flavobacteriaceae; NS5 marine group; uncultured Flavobacteriia bacterium
634	0	0	0	0	0	0	0	0	0	0	0	0	0	0	0	0	0	0	0	0	0	0	0	0	0	1	Bacteria; Bacteroidetes; Flavobacteriia; Flavobacteriales; Flavobacteriaceae; NS5 marine group; uncultured Flavobacteriia bacterium
635	0	0	64	0	0	0	0	0	0	0	0	0	0	0	0	0	0	0	0	0	0	0	0	0	0	0	Bacteria; Bacteroidetes; Flavobacteriia; Flavobacteriales; Flavobacteriaceae; NS5 marine group; uncultured Flavobacteriia bacterium
636	0	0	0	0	0	0	0	0	0	0	0	0	0	0	0	0	0	0	0	0	0	1	0	0	0	0	Bacteria; Bacteroidetes; Flavobacteriia; Flavobacteriales; Flavobacteriaceae; NS5 marine group; uncultured Flavobacteriia bacterium
637	0	0	0	0	0	0	0	0	0	0	0	0	0	0	0	12	0	0	0	0	0	0	0	0	0	0	Bacteria; Bacteroidetes; Flavobacteriia; Flavobacteriales; Flavobacteriaceae; NS5 marine group; uncultured Flavobacterium sp.
638	0	0	0	0	0	0	0	0	0	0	0	0	0	0	0	0	0	0	0	0	0	14	0	0	0	0	Bacteria; Bacteroidetes; Flavobacteriia; Flavobacteriales; Flavobacteriaceae; NS5 marine group; uncultured Flavobacterium sp.
639	0	0	0	0	0	0	0	0	0	0	0	0	0	0	0	0	0	0	0	0	0	0	0	0	3	0	Bacteria; Bacteroidetes; Flavobacteriia; Flavobacteriales; Flavobacteriaceae; NS5 marine group; uncultured Flavobacterium sp.
640	0	0	0	0	0	0	0	0	0	0	0	0	0	0	0	0	0	0	0	1	0	0	0	0	0	0	Bacteria; Bacteroidetes; Flavobacteriia; Flavobacteriales; Flavobacteriaceae; NS5 marine group; uncultured Flavobacterium sp.
641	0	0	0	0	0	0	0	0	0	0	0	0	0	0	0	0	0	0	0	0	0	5	0	0	0	0	Bacteria; Bacteroidetes; Flavobacteriia; Flavobacteriales; Flavobacteriaceae; NS5 marine group; uncultured Flavobacterium sp.
642	0	0	0	0	0	0	0	0	0	0	0	0	4	0	0	0	0	0	0	0	0	0	0	0	0	0	Bacteria; Bacteroidetes; Flavobacteriia; Flavobacteriales; Flavobacteriaceae; NS5 marine group; uncultured Flavobacterium sp.
643	0	0	0	0	0	0	0	0	0	0	0	0	0	0	0	0	0	0	0	0	0	1	0	0	0	0	Bacteria; Bacteroidetes; Flavobacteriia; Flavobacteriales; Flavobacteriaceae; NS5 marine group; uncultured Flavobacterium sp.
644	624	133	198	3	226	325	112	238	649	536	143	300	5	325	0	95	4	127	545	466	168	374	266	49	145	0	Bacteria; Bacteroidetes; Flavobacteriia; Flavobacteriales; Flavobacteriaceae; NS5 marine group; uncultured Flavobacterium sp.
645	0	0	0	0	0	0	0	0	0	0	0	0	0	0	0	0	0	0	0	0	0	23	0	0	0	0	Bacteria; Bacteroidetes; Flavobacteriia; Flavobacteriales; Flavobacteriaceae; NS5 marine group; uncultured Flavobacterium sp.
646	0	0	0	0	0	0	0	0	0	0	0	0	0	0	0	0	0	0	0	0	0	16	0	0	0	0	Bacteria; Bacteroidetes; Flavobacteriia; Flavobacteriales; Flavobacteriaceae; NS5 marine group; uncultured Flavobacterium sp.
647	0	0	0	0	0	0	0	0	0	0	0	0	0	0	0	0	0	0	0	1	0	0	0	0	0	0	Bacteria; Bacteroidetes; Flavobacteriia; Flavobacteriales; Flavobacteriaceae; NS5 marine group; uncultured marine bacterium
648	0	0	0	0	0	0	0	0	0	0	0	0	0	0	0	0	0	0	0	1	0	0	0	0	0	0	Bacteria; Bacteroidetes; Flavobacteriia; Flavobacteriales; Flavobacteriaceae; NS5 marine group; uncultured marine bacterium
649	0	0	0	0	0	0	0	0	0	0	0	0	0	0	0	0	0	2	0	0	0	0	0	0	0	0	Bacteria; Bacteroidetes; Flavobacteriia; Flavobacteriales; Flavobacteriaceae; NS5 marine group; uncultured marine bacterium
650	0	0	0	0	0	0	0	0	0	0	0	0	0	0	0	0	0	19	0	0	0	0	0	0	0	0	Bacteria; Bacteroidetes; Flavobacteriia; Flavobacteriales; Flavobacteriaceae; NS5 marine group; uncultured marine bacterium
651	0	0	0	0	0	0	0	0	0	0	0	0	0	0	0	1	0	0	0	0	0	0	0	0	0	0	Bacteria; Bacteroidetes; Flavobacteriia; Flavobacteriales; Flavobacteriaceae; NS5 marine group; uncultured marine bacterium
652	0	0	0	0	0	0	0	0	0	0	0	0	0	0	0	0	0	5	0	0	0	0	0	0	0	0	Bacteria; Bacteroidetes; Flavobacteriia; Flavobacteriales; Flavobacteriaceae; NS5 marine group; uncultured marine bacterium
653	0	0	0	0	0	0	0	0	0	0	0	0	0	0	0	0	0	0	0	0	1	0	0	0	0	0	Bacteria; Bacteroidetes; Flavobacteriia; Flavobacteriales; Flavobacteriaceae; NS5 marine group; uncultured marine bacterium
654	0	0	0	0	0	0	0	0	0	0	0	0	0	0	0	0	0	0	0	0	0	13	0	0	0	0	Bacteria; Bacteroidetes; Flavobacteriia; Flavobacteriales; Flavobacteriaceae; NS5 marine group; uncultured marine bacterium
655	0	0	0	0	0	0	0	0	0	0	0	0	0	0	0	0	0	0	0	1	0	0	0	0	0	0	Bacteria; Bacteroidetes; Flavobacteriia; Flavobacteriales; Flavobacteriaceae; NS5 marine group; uncultured marine microorganism
656	0	0	0	0	0	0	0	0	0	0	0	0	0	0	0	0	0	0	0	0	1	0	0	0	0	0	Bacteria; Bacteroidetes; Flavobacteriia; Flavobacteriales; Flavobacteriaceae; NS5 marine group; unidentified marine eubacterium
657	0	0	0	0	0	0	0	0	0	0	0	0	0	0	0	0	0	0	8	0	0	0	0	0	0	0	Bacteria; Bacteroidetes; Flavobacteriia; Flavobacteriales; Flavobacteriaceae; Polaribacter; Polaribacter sp. IMCC17010
658	0	0	0	0	0	0	0	0	0	0	0	0	0	0	0	0	0	0	0	0	0	0	0	0	0	1	Bacteria; Bacteroidetes; Flavobacteriia; Flavobacteriales; Flavobacteriaceae; Polaribacter; Polaribacter sp. PG-5
659	0	0	0	0	0	0	0	0	0	0	7	0	0	0	0	0	0	0	0	0	0	17	0	15	0	0	Bacteria; Bacteroidetes; Flavobacteriia; Flavobacteriales; Flavobacteriaceae; Polaribacter; Polaribacter sp. PG-5
660	0	0	0	8	5	0	0	0	0	0	0	0	0	0	0	0	0	0	23	0	0	3	6	0	0	0	Bacteria; Bacteroidetes; Flavobacteriia; Flavobacteriales; Flavobacteriaceae; Polaribacter; Polaribacter sp. PG-5
661	11	0	0	0	0	8	0	0	0	0	6	0	0	0	15	0	0	0	0	0	0	0	0	0	0	0	Bacteria; Bacteroidetes; Flavobacteriia; Flavobacteriales; Flavobacteriaceae; Polaribacter; Polaribacter sp. PG-5
662	0	0	0	0	0	0	0	0	0	0	0	0	0	0	0	0	0	0	0	0	0	0	0	1	0	0	Bacteria; Bacteroidetes; Flavobacteriia; Flavobacteriales; Flavobacteriaceae; Polaribacter; uncultured bacterium
663	0	0	0	0	0	0	0	0	0	0	0	0	0	0	0	0	0	0	4	0	0	0	0	0	0	0	Bacteria; Bacteroidetes; Flavobacteriia; Flavobacteriales; Flavobacteriaceae; Polaribacter; uncultured bacterium
664	53	49	259	14	48	175	49	122	49	34	6	25	19	37	51	320	9	101	223	491	124	32	0	0	6	34	Bacteria; Bacteroidetes; Flavobacteriia; Flavobacteriales; Flavobacteriaceae; Polaribacter; uncultured bacterium
665	0	0	0	0	0	0	0	0	0	0	0	0	0	0	0	10	0	0	0	0	0	0	0	0	0	0	Bacteria; Bacteroidetes; Flavobacteriia; Flavobacteriales; Flavobacteriaceae; Polaribacter; uncultured bacterium
666	0	2	0	0	2	2	0	0	0	0	0	0	0	0	0	16	0	0	9	0	0	10	0	0	0	0	Bacteria; Bacteroidetes; Flavobacteriia; Flavobacteriales; Flavobacteriaceae; Polaribacter; uncultured bacterium
667	0	0	0	0	0	0	0	0	0	0	0	0	0	0	0	0	0	6	4	0	0	0	0	0	0	0	Bacteria; Bacteroidetes; Flavobacteriia; Flavobacteriales; Flavobacteriaceae; Polaribacter; uncultured bacterium
668	0	0	0	4	0	0	0	0	0	0	0	0	5	0	0	0	0	0	0	0	0	0	12	0	0	0	Bacteria; Bacteroidetes; Flavobacteriia; Flavobacteriales; Flavobacteriaceae; Polaribacter; uncultured bacterium
669	0	0	0	0	0	6	0	0	0	0	0	0	4	0	1	6	0	0	13	0	1	0	0	0	1	0	Bacteria; Bacteroidetes; Flavobacteriia; Flavobacteriales; Flavobacteriaceae; Polaribacter; uncultured Bacteroidetes bacterium
670	0	0	0	0	0	0	0	0	0	0	0	0	0	0	0	0	0	0	19	0	0	0	0	0	0	0	Bacteria; Bacteroidetes; Flavobacteriia; Flavobacteriales; Flavobacteriaceae; Polaribacter; uncultured Bacteroidetes bacterium
671	0	0	0	0	0	0	0	0	0	0	0	0	0	0	0	0	0	0	0	9	0	0	0	0	0	0	Bacteria; Bacteroidetes; Flavobacteriia; Flavobacteriales; Flavobacteriaceae; Polaribacter; uncultured Bacteroidetes bacterium
672	0	0	13	0	0	0	0	0	0	0	0	0	0	0	0	0	0	0	0	0	0	0	0	0	0	0	Bacteria; Bacteroidetes; Flavobacteriia; Flavobacteriales; Flavobacteriaceae; Polaribacter; uncultured Flavobacteriaceae bacterium
673	0	0	0	0	0	0	0	0	0	0	0	0	0	0	0	0	0	0	0	0	1	0	0	0	0	0	Bacteria; Bacteroidetes; Flavobacteriia; Flavobacteriales; Flavobacteriaceae; Polaribacter; uncultured Flavobacteriaceae bacterium
674	30	349	493	36	61	413	56	459	171	100	56	299	8	164	39	171	86	59	1100	1056	767	104	56	33	150	0	Bacteria; Bacteroidetes; Flavobacteriia; Flavobacteriales; Flavobacteriaceae; Polaribacter; uncultured Flavobacteriaceae bacterium
675	0	0	0	0	0	0	0	0	0	0	0	0	0	0	0	0	0	0	0	0	0	0	0	0	0	1	Bacteria; Bacteroidetes; Flavobacteriia; Flavobacteriales; Flavobacteriaceae; Polaribacter; uncultured Flavobacteriaceae bacterium
676	0	0	0	0	0	0	0	0	0	0	0	0	0	0	9	0	0	0	0	0	0	0	1	0	0	0	Bacteria; Bacteroidetes; Flavobacteriia; Flavobacteriales; Flavobacteriaceae; Polaribacter; uncultured Flavobacteriaceae bacterium
677	0	0	0	0	0	0	0	1	0	0	0	0	0	0	0	0	0	0	0	0	0	0	0	0	0	0	Bacteria; Bacteroidetes; Flavobacteriia; Flavobacteriales; Flavobacteriaceae; Polaribacter; uncultured Flavobacteriaceae bacterium
678	0	0	0	0	0	1	0	0	0	0	0	0	0	0	0	0	0	0	0	0	0	0	0	0	0	0	Bacteria; Bacteroidetes; Flavobacteriia; Flavobacteriales; Flavobacteriaceae; Polaribacter; uncultured Flavobacteriaceae bacterium
679	0	0	0	0	0	0	0	0	0	0	0	0	0	0	0	0	0	0	0	0	0	0	0	0	10	0	Bacteria; Bacteroidetes; Flavobacteriia; Flavobacteriales; Flavobacteriaceae; Polaribacter; uncultured Flavobacteriaceae bacterium
680	23	0	0	0	0	0	0	5	0	17	0	0	23	0	0	0	8	0	0	0	24	0	0	0	0	0	Bacteria; Bacteroidetes; Flavobacteriia; Flavobacteriales; Flavobacteriaceae; Polaribacter; uncultured Flavobacteriaceae bacterium
681	0	0	0	0	0	0	0	0	0	0	0	0	0	16	23	0	0	0	0	0	0	0	0	0	0	0	Bacteria; Bacteroidetes; Flavobacteriia; Flavobacteriales; Flavobacteriaceae; Polaribacter; uncultured Flavobacterium sp.
682	0	0	0	0	0	0	0	0	0	0	0	0	0	0	0	0	0	0	0	1	0	0	0	0	0	0	Bacteria; Bacteroidetes; Flavobacteriia; Flavobacteriales; Flavobacteriaceae; Polaribacter; uncultured marine bacterium
683	0	0	1	0	0	0	0	0	0	0	0	0	0	0	0	0	0	0	0	0	0	0	0	0	0	0	Bacteria; Bacteroidetes; Flavobacteriia; Flavobacteriales; Flavobacteriaceae; Psychroserpens; uncultured bacterium
684	0	0	1	0	0	0	0	0	0	0	0	0	0	0	0	0	0	0	0	0	0	0	0	0	0	0	Bacteria; Bacteroidetes; Flavobacteriia; Flavobacteriales; Flavobacteriaceae; Psychroserpens; uncultured bacterium
685	0	0	0	0	0	0	0	0	0	1	0	0	0	0	0	0	0	0	0	0	0	0	0	0	0	0	Bacteria; Bacteroidetes; Flavobacteriia; Flavobacteriales; Flavobacteriaceae; Robiginitalea; uncultured bacterium
686	0	0	0	0	0	0	1	0	0	0	0	0	0	0	0	0	0	0	0	0	0	0	0	0	0	0	Bacteria; Bacteroidetes; Flavobacteriia; Flavobacteriales; Flavobacteriaceae; Sufflavibacter; uncultured bacterium
687	0	0	0	0	0	0	0	0	0	0	0	0	0	0	0	0	0	0	0	0	3	0	0	0	0	0	Bacteria; Bacteroidetes; Flavobacteriia; Flavobacteriales; Flavobacteriaceae; Sufflavibacter; uncultured bacterium
688	0	0	0	0	0	0	0	0	0	0	0	0	0	0	0	0	0	0	0	0	1	0	0	0	0	0	Bacteria; Bacteroidetes; Flavobacteriia; Flavobacteriales; Flavobacteriaceae; Sufflavibacter; uncultured bacterium
689	0	0	0	16	0	0	0	0	3	0	0	0	1	0	0	0	0	0	0	0	0	0	0	0	0	0	Bacteria; Bacteroidetes; Flavobacteriia; Flavobacteriales; Flavobacteriaceae; Sufflavibacter; uncultured bacterium
690	0	0	0	0	0	0	0	0	0	0	0	0	151	0	0	0	0	0	0	0	0	0	0	0	0	0	Bacteria; Bacteroidetes; Flavobacteriia; Flavobacteriales; Flavobacteriaceae; Sufflavibacter; uncultured bacterium
691	0	0	0	0	0	0	0	0	0	0	0	0	0	0	0	0	0	0	0	0	11	0	0	0	0	0	Bacteria; Bacteroidetes; Flavobacteriia; Flavobacteriales; Flavobacteriaceae; Sufflavibacter; uncultured bacterium
692	0	0	0	0	0	0	0	0	0	0	0	0	0	0	0	0	0	1	0	0	0	0	0	0	0	0	Bacteria; Bacteroidetes; Flavobacteriia; Flavobacteriales; Flavobacteriaceae; Sufflavibacter; uncultured bacterium
693	0	0	0	0	0	0	0	0	0	0	0	0	0	0	0	0	0	0	2	0	0	0	0	0	0	0	Bacteria; Bacteroidetes; Flavobacteriia; Flavobacteriales; Flavobacteriaceae; Sufflavibacter; uncultured bacterium
694	0	0	0	0	0	0	0	0	0	0	0	0	0	0	0	0	0	1	0	0	0	0	0	0	0	0	Bacteria; Bacteroidetes; Flavobacteriia; Flavobacteriales; Flavobacteriaceae; Sufflavibacter; uncultured marine bacterium
695	0	0	0	0	0	0	0	0	0	0	0	0	0	0	0	0	0	0	0	1	0	0	0	0	0	0	Bacteria; Bacteroidetes; Flavobacteriia; Flavobacteriales; Flavobacteriaceae; Sufflavibacter; uncultured marine bacterium
696	0	0	0	0	0	0	0	0	0	0	0	0	0	0	0	0	0	1	0	0	0	0	0	0	0	0	Bacteria; Bacteroidetes; Flavobacteriia; Flavobacteriales; Flavobacteriaceae; Sufflavibacter; uncultured marine bacterium
697	0	0	0	0	0	0	0	0	0	0	0	0	0	0	0	0	0	0	1	0	0	0	0	0	0	0	Bacteria; Bacteroidetes; Flavobacteriia; Flavobacteriales; Flavobacteriaceae; Sufflavibacter; unidentified marine bacterioplankton
698	0	0	0	0	0	0	0	0	0	0	0	0	0	0	0	0	0	6	0	0	0	0	0	0	0	0	Bacteria; Bacteroidetes; Flavobacteriia; Flavobacteriales; Flavobacteriaceae; Tenacibaculum; Tenacibaculum maritimum
699	0	0	0	0	0	0	0	0	0	0	0	0	0	0	0	0	0	0	1	0	0	0	0	0	0	0	Bacteria; Bacteroidetes; Flavobacteriia; Flavobacteriales; Flavobacteriaceae; Tenacibaculum; Tenacibaculum sp. P-R2A1-2
700	0	0	0	0	0	0	5	10	0	0	0	0	0	0	0	0	0	11	48	47	55	2	5	2	0	0	Bacteria; Bacteroidetes; Flavobacteriia; Flavobacteriales; Flavobacteriaceae; Tenacibaculum; uncultured bacterium
701	99	103	134	2	15	64	59	104	38	45	21	57	4	126	405	45	13	16	147	202	123	27	14	17	16	0	Bacteria; Bacteroidetes; Flavobacteriia; Flavobacteriales; Flavobacteriaceae; Ulvibacter; marine metagenome
702	24	0	0	7	0	23	0	0	0	0	4	0	0	0	1	0	1	0	0	0	0	0	0	0	5	0	Bacteria; Bacteroidetes; Flavobacteriia; Flavobacteriales; Flavobacteriaceae; Ulvibacter; marine metagenome
703	0	0	0	0	0	0	0	0	0	0	0	0	0	0	0	0	0	0	1	0	0	0	0	0	0	0	Bacteria; Bacteroidetes; Flavobacteriia; Flavobacteriales; Flavobacteriaceae; Ulvibacter; uncultured bacterium
704	0	0	0	0	0	0	0	0	0	0	0	0	0	0	0	0	0	0	0	1	0	0	0	0	0	0	Bacteria; Bacteroidetes; Flavobacteriia; Flavobacteriales; Flavobacteriaceae; Ulvibacter; uncultured bacterium
705	0	0	0	0	0	0	0	0	0	0	0	0	0	0	1	0	0	0	0	0	0	0	0	0	0	0	Bacteria; Bacteroidetes; Flavobacteriia; Flavobacteriales; Flavobacteriaceae; Ulvibacter; uncultured marine bacterium
706	0	0	0	0	0	0	0	0	0	0	0	0	0	0	0	0	0	0	0	0	3	0	0	0	0	0	Bacteria; Bacteroidetes; Flavobacteriia; Flavobacteriales; Flavobacteriaceae; Ulvibacter; uncultured marine bacterium
707	0	0	0	0	0	0	0	0	0	0	0	0	0	0	1	0	0	0	0	0	0	0	0	0	0	0	Bacteria; Bacteroidetes; Flavobacteriia; Flavobacteriales; Flavobacteriaceae; Ulvibacter; uncultured Ulvibacter sp.
708	0	0	0	4	0	0	0	0	3	3	2	0	0	0	0	0	0	0	0	0	0	6	0	0	4	0	Bacteria; Bacteroidetes; Flavobacteriia; Flavobacteriales; Flavobacteriaceae; uncultured Flavobacteriaceae bacterium
709	0	0	0	0	0	0	0	0	0	0	0	0	0	0	0	0	0	0	0	1	0	0	0	0	0	0	Bacteria; Bacteroidetes; Flavobacteriia; Flavobacteriales; Flavobacteriaceae; uncultured; Flavobacteriaceae bacterium Hel1_33_5
710	0	0	0	0	0	0	0	0	0	0	0	0	0	0	0	0	0	0	0	0	4	0	0	0	0	0	Bacteria; Bacteroidetes; Flavobacteriia; Flavobacteriales; Flavobacteriaceae; uncultured; Gaetbulibacter sp. CC-AMZ-304
711	6	16	27	0	0	25	0	13	2	0	8	5	0	15	27	0	0	0	71	62	28	0	0	0	0	0	Bacteria; Bacteroidetes; Flavobacteriia; Flavobacteriales; Flavobacteriaceae; uncultured; marine metagenome
712	0	0	0	0	0	0	0	0	0	0	0	0	0	0	0	0	0	0	9	0	0	0	0	0	0	0	Bacteria; Bacteroidetes; Flavobacteriia; Flavobacteriales; Flavobacteriaceae; uncultured; marine metagenome
713	0	0	0	0	0	0	0	0	0	0	0	0	0	0	0	0	0	0	0	0	0	0	1	0	0	0	Bacteria; Bacteroidetes; Flavobacteriia; Flavobacteriales; Flavobacteriaceae; uncultured; uncultured bacterium
714	0	0	0	0	0	0	0	0	0	0	0	0	0	0	0	0	0	0	0	8	0	0	0	0	0	0	Bacteria; Bacteroidetes; Flavobacteriia; Flavobacteriales; Flavobacteriaceae; uncultured; uncultured bacterium
715	0	0	0	0	0	0	0	0	0	0	0	0	0	0	0	0	0	0	0	0	1	0	0	0	0	0	Bacteria; Bacteroidetes; Flavobacteriia; Flavobacteriales; Flavobacteriaceae; uncultured; uncultured bacterium
716	0	0	0	0	0	2	0	0	1	1	0	0	1	0	0	0	1	0	0	0	0	0	0	0	0	0	Bacteria; Bacteroidetes; Flavobacteriia; Flavobacteriales; Flavobacteriaceae; uncultured; uncultured bacterium
717	18	341	88	0	39	422	49	366	8	0	3	37	0	0	0	11	0	5	653	265	120	0	0	0	4	0	Bacteria; Bacteroidetes; Flavobacteriia; Flavobacteriales; Flavobacteriaceae; uncultured; uncultured bacterium
718	0	0	0	0	0	0	1	0	0	0	0	0	0	0	0	0	0	0	0	0	0	0	0	0	0	0	Bacteria; Bacteroidetes; Flavobacteriia; Flavobacteriales; Flavobacteriaceae; uncultured; uncultured bacterium
719	0	0	0	0	0	0	0	0	0	6	0	0	0	0	0	0	0	0	0	0	0	0	0	0	0	0	Bacteria; Bacteroidetes; Flavobacteriia; Flavobacteriales; Flavobacteriaceae; uncultured; uncultured bacterium
720	0	0	0	0	0	0	0	1	0	4	0	0	0	0	0	0	0	0	0	0	0	0	2	0	0	0	Bacteria; Bacteroidetes; Flavobacteriia; Flavobacteriales; Flavobacteriaceae; uncultured; uncultured bacterium
721	0	0	0	17	7	0	0	0	55	7	20	26	25	0	0	0	0	9	0	0	0	32	12	17	44	8	Bacteria; Bacteroidetes; Flavobacteriia; Flavobacteriales; Flavobacteriaceae; uncultured; uncultured bacterium
722	0	0	0	0	0	0	0	0	0	0	0	0	0	0	0	0	0	0	0	45	0	0	0	0	0	0	Bacteria; Bacteroidetes; Flavobacteriia; Flavobacteriales; Flavobacteriaceae; uncultured; uncultured bacterium
723	0	0	0	0	0	0	0	0	0	0	0	0	0	0	0	10	0	0	0	0	0	0	0	0	0	0	Bacteria; Bacteroidetes; Flavobacteriia; Flavobacteriales; Flavobacteriaceae; uncultured; uncultured bacterium
724	0	0	0	0	0	0	0	0	0	0	0	0	0	0	0	0	0	0	0	0	0	0	0	1	0	0	Bacteria; Bacteroidetes; Flavobacteriia; Flavobacteriales; Flavobacteriaceae; uncultured; uncultured bacterium
725	22	93	367	0	6	47	0	89	0	0	2	1	0	7	0	12	0	0	39	21	15	0	0	0	0	0	Bacteria; Bacteroidetes; Flavobacteriia; Flavobacteriales; Flavobacteriaceae; uncultured; uncultured bacterium
726	0	0	0	0	0	0	0	0	0	0	0	0	0	0	0	0	0	0	0	0	0	0	0	1	0	0	Bacteria; Bacteroidetes; Flavobacteriia; Flavobacteriales; Flavobacteriaceae; uncultured; uncultured bacterium
727	0	0	0	0	0	0	0	0	0	0	0	0	0	0	0	0	0	0	0	0	0	4	0	0	0	0	Bacteria; Bacteroidetes; Flavobacteriia; Flavobacteriales; Flavobacteriaceae; uncultured; uncultured bacterium
728	0	0	0	0	0	0	0	0	0	0	0	0	0	0	0	0	0	1	0	0	0	0	0	0	0	0	Bacteria; Bacteroidetes; Flavobacteriia; Flavobacteriales; Flavobacteriaceae; uncultured; uncultured bacterium
729	0	0	0	0	0	0	0	0	0	0	0	0	0	1	0	0	0	0	0	0	0	0	0	0	0	0	Bacteria; Bacteroidetes; Flavobacteriia; Flavobacteriales; Flavobacteriaceae; uncultured; uncultured bacterium
730	0	0	0	0	0	0	1	0	0	0	0	0	0	0	0	0	0	0	0	0	0	0	0	0	0	0	Bacteria; Bacteroidetes; Flavobacteriia; Flavobacteriales; Flavobacteriaceae; uncultured; uncultured bacterium
731	0	0	0	0	0	0	0	0	0	0	0	0	0	0	0	0	0	0	0	0	0	0	0	0	1	0	Bacteria; Bacteroidetes; Flavobacteriia; Flavobacteriales; Flavobacteriaceae; uncultured; uncultured bacterium
732	0	5	0	0	0	0	0	0	2	0	0	0	0	0	0	0	0	0	0	0	0	0	0	0	0	0	Bacteria; Bacteroidetes; Flavobacteriia; Flavobacteriales; Flavobacteriaceae; uncultured; uncultured bacterium
733	0	0	0	0	0	0	0	0	0	0	0	0	0	1	0	0	0	0	0	0	0	0	0	0	0	0	Bacteria; Bacteroidetes; Flavobacteriia; Flavobacteriales; Flavobacteriaceae; uncultured; uncultured bacterium
734	2	0	0	0	0	0	0	1	0	0	0	0	0	0	0	0	0	0	0	1	0	0	0	0	0	0	Bacteria; Bacteroidetes; Flavobacteriia; Flavobacteriales; Flavobacteriaceae; uncultured; uncultured Bacteroidetes bacterium
735	0	0	0	0	0	0	0	0	0	0	0	0	0	0	1	0	0	0	0	0	0	0	0	0	0	0	Bacteria; Bacteroidetes; Flavobacteriia; Flavobacteriales; Flavobacteriaceae; uncultured; uncultured Bacteroidetes bacterium
736	0	0	0	0	0	0	0	0	0	0	0	0	0	0	0	0	0	0	0	1	0	0	0	0	0	0	Bacteria; Bacteroidetes; Flavobacteriia; Flavobacteriales; Flavobacteriaceae; uncultured; uncultured Bacteroidetes bacterium
737	0	0	0	0	0	0	0	0	0	0	0	0	0	0	0	0	0	0	0	0	2	0	0	0	0	0	Bacteria; Bacteroidetes; Flavobacteriia; Flavobacteriales; Flavobacteriaceae; uncultured; uncultured Bacteroidetes bacterium
738	1	2	13	0	0	0	0	0	0	0	0	0	0	3	0	0	0	0	0	0	10	0	0	0	0	0	Bacteria; Bacteroidetes; Flavobacteriia; Flavobacteriales; Flavobacteriaceae; uncultured; uncultured Bacteroidetes bacterium
739	0	0	0	0	0	0	0	0	0	2	0	0	0	0	0	0	0	0	0	0	0	0	0	0	0	0	Bacteria; Bacteroidetes; Flavobacteriia; Flavobacteriales; Flavobacteriaceae; uncultured; uncultured Bacteroidetes bacterium
740	0	0	0	1	0	0	0	0	0	0	0	0	0	0	0	0	0	0	0	0	0	0	0	0	0	0	Bacteria; Bacteroidetes; Flavobacteriia; Flavobacteriales; Flavobacteriaceae; uncultured; uncultured Flavobacteriaceae bacterium
741	0	0	0	0	0	0	0	0	0	0	0	0	0	5	0	0	0	0	0	0	0	0	0	0	0	0	Bacteria; Bacteroidetes; Flavobacteriia; Flavobacteriales; Flavobacteriaceae; uncultured; uncultured Flavobacteriaceae bacterium
742	0	0	0	0	0	0	0	0	0	0	1	0	0	0	0	0	0	0	0	0	0	0	0	0	0	0	Bacteria; Bacteroidetes; Flavobacteriia; Flavobacteriales; Flavobacteriaceae; uncultured; uncultured Flavobacteriaceae bacterium
743	0	0	1	2	0	0	0	0	0	0	0	0	0	1	30	0	0	0	0	0	0	0	0	0	0	0	Bacteria; Bacteroidetes; Flavobacteriia; Flavobacteriales; Flavobacteriaceae; uncultured; uncultured Flavobacteriaceae bacterium
744	0	0	0	0	0	0	0	0	0	0	0	0	0	0	0	0	0	0	0	0	4	0	0	0	0	0	Bacteria; Bacteroidetes; Flavobacteriia; Flavobacteriales; Flavobacteriaceae; uncultured; uncultured Flavobacteriia bacterium
745	0	0	0	0	0	0	0	0	0	0	0	0	0	0	0	7	0	0	0	0	0	0	0	0	0	0	Bacteria; Bacteroidetes; Flavobacteriia; Flavobacteriales; Flavobacteriaceae; uncultured; uncultured Flavobacteriia bacterium
746	0	0	0	0	0	0	0	0	0	0	0	0	0	0	0	0	0	0	0	0	0	0	0	0	0	1	Bacteria; Bacteroidetes; Flavobacteriia; Flavobacteriales; Flavobacteriaceae; uncultured; uncultured Flavobacteriia bacterium
747	23	29	67	38	0	135	43	112	78	64	45	88	59	0	14	7	24	13	168	255	99	45	19	16	60	2	Bacteria; Bacteroidetes; Flavobacteriia; Flavobacteriales; Flavobacteriaceae; uncultured; uncultured Flavobacteriia bacterium
748	0	0	0	0	0	0	0	0	0	0	0	0	0	0	0	0	0	0	0	0	0	0	0	0	0	1	Bacteria; Bacteroidetes; Flavobacteriia; Flavobacteriales; Flavobacteriaceae; uncultured; uncultured marine bacterium
749	0	0	0	0	0	0	0	0	0	0	0	0	0	0	0	0	0	0	0	0	0	0	0	0	2	0	Bacteria; Bacteroidetes; Flavobacteriia; Flavobacteriales; Flavobacteriaceae; uncultured; uncultured marine bacterium
750	0	0	0	1	0	0	0	0	0	0	0	0	0	0	0	0	0	0	0	0	0	0	0	0	0	0	Bacteria; Bacteroidetes; Flavobacteriia; Flavobacteriales; Flavobacteriaceae; uncultured; uncultured marine bacterium
751	0	0	0	1	0	0	0	0	0	0	0	0	0	0	0	0	0	0	0	0	0	0	0	0	0	0	Bacteria; Bacteroidetes; Flavobacteriia; Flavobacteriales; Flavobacteriaceae; uncultured; uncultured marine bacterium
752	0	0	0	16	0	11	0	0	16	14	5	0	0	0	0	0	0	0	0	0	0	0	1	0	0	0	Bacteria; Bacteroidetes; Flavobacteriia; Flavobacteriales; Flavobacteriaceae; uncultured; uncultured marine bacterium
753	0	0	0	0	0	0	0	0	0	0	0	0	0	0	1	0	0	0	0	0	0	0	0	0	0	0	Bacteria; Bacteroidetes; Flavobacteriia; Flavobacteriales; Flavobacteriaceae; Winogradskyella; uncultured Bacteroidetes bacterium
754	0	0	0	0	0	0	0	0	0	0	0	0	0	0	0	0	0	0	0	1	0	0	0	0	0	0	Bacteria; Bacteroidetes; Flavobacteriia; Flavobacteriales; Flavobacteriaceae; Winogradskyella; uncultured Bacteroidetes bacterium
755	0	0	0	0	0	0	0	0	0	0	0	0	0	0	0	0	0	0	0	9	0	0	0	0	0	0	Bacteria; Bacteroidetes; Flavobacteriia; Flavobacteriales; Flavobacteriaceae; Winogradskyella; uncultured Bacteroidetes bacterium
756	146	156	84	0	4	38	9	20	11	5	0	0	0	62	100	12	9	1	31	22	30	0	0	0	0	0	Bacteria; Bacteroidetes; Flavobacteriia; Flavobacteriales; Flavobacteriaceae; Winogradskyella; uncultured Bacteroidetes bacterium
757	0	0	0	0	0	0	0	0	0	0	0	0	0	0	0	0	0	1	0	0	0	0	0	0	0	0	Bacteria; Bacteroidetes; Flavobacteriia; Flavobacteriales; NS7 marine group; uncultured bacterium
758	0	0	0	0	0	0	0	0	0	0	0	0	0	0	0	0	0	0	0	0	7	0	0	0	0	0	Bacteria; Bacteroidetes; Flavobacteriia; Flavobacteriales; NS7 marine group; uncultured bacterium
759	0	0	0	0	0	0	0	0	0	0	0	0	0	0	0	0	0	1	0	0	0	0	0	0	0	0	Bacteria; Bacteroidetes; Flavobacteriia; Flavobacteriales; NS7 marine group; uncultured bacterium
760	0	0	0	0	0	0	0	0	0	0	0	0	0	0	0	0	0	0	0	0	0	0	0	0	27	0	Bacteria; Bacteroidetes; Flavobacteriia; Flavobacteriales; NS7 marine group; uncultured bacterium
761	0	0	0	15	0	0	0	0	0	0	0	0	28	9	78	0	0	0	0	0	0	0	0	4	0	36	Bacteria; Bacteroidetes; Flavobacteriia; Flavobacteriales; NS7 marine group; uncultured bacterium
762	0	0	0	0	0	0	0	0	0	0	0	0	0	0	0	0	0	0	0	0	0	0	0	0	1	0	Bacteria; Bacteroidetes; Flavobacteriia; Flavobacteriales; NS7 marine group; uncultured bacterium
763	0	0	0	0	0	0	0	0	0	0	0	0	0	0	0	0	0	0	0	0	7	0	0	0	0	0	Bacteria; Bacteroidetes; Flavobacteriia; Flavobacteriales; NS7 marine group; uncultured bacterium
764	0	0	0	0	0	0	0	0	0	0	0	0	0	0	0	0	0	18	0	0	1	0	0	0	0	0	Bacteria; Bacteroidetes; Flavobacteriia; Flavobacteriales; NS7 marine group; uncultured bacterium
765	0	0	0	0	0	0	0	0	0	0	0	0	0	0	0	0	0	0	0	0	0	0	0	0	4	0	Bacteria; Bacteroidetes; Flavobacteriia; Flavobacteriales; NS7 marine group; uncultured bacterium
766	0	0	0	0	0	0	0	0	1	0	0	0	0	2	0	0	2	0	4	1	2	1	0	15	0	11	Bacteria; Bacteroidetes; Flavobacteriia; Flavobacteriales; NS7 marine group; uncultured bacterium
767	0	0	0	0	0	0	0	0	0	0	0	0	0	0	0	0	0	0	0	0	23	0	0	0	0	0	Bacteria; Bacteroidetes; Flavobacteriia; Flavobacteriales; NS7 marine group; uncultured bacterium
768	0	0	0	0	0	0	0	0	0	0	0	0	0	0	0	0	0	0	1	0	0	0	0	0	0	0	Bacteria; Bacteroidetes; Flavobacteriia; Flavobacteriales; NS7 marine group; uncultured bacterium
769	0	0	0	0	0	0	0	0	0	0	0	0	0	0	0	0	0	0	0	0	5	0	0	0	0	0	Bacteria; Bacteroidetes; Flavobacteriia; Flavobacteriales; NS7 marine group; uncultured bacterium
770	0	0	0	0	0	0	0	0	0	0	0	0	0	0	0	0	0	0	0	1	0	0	0	0	0	0	Bacteria; Bacteroidetes; Flavobacteriia; Flavobacteriales; NS7 marine group; uncultured bacterium
771	3	10	0	7	0	6	6	0	0	0	3	0	0	0	0	0	3	0	27	0	0	0	0	0	14	0	Bacteria; Bacteroidetes; Flavobacteriia; Flavobacteriales; NS7 marine group; uncultured bacterium
772	11	8	0	0	0	21	0	0	0	1	13	24	0	1	0	0	0	0	0	0	0	0	0	0	0	1	Bacteria; Bacteroidetes; Flavobacteriia; Flavobacteriales; NS7 marine group; uncultured bacterium
773	0	0	0	0	0	0	0	0	0	0	0	0	0	0	0	0	0	0	0	0	0	0	0	0	1	0	Bacteria; Bacteroidetes; Flavobacteriia; Flavobacteriales; NS7 marine group; uncultured bacterium
774	0	0	0	0	0	0	0	0	0	0	0	0	0	0	0	0	0	139	24	0	0	0	0	0	43	0	Bacteria; Bacteroidetes; Flavobacteriia; Flavobacteriales; NS7 marine group; uncultured bacterium
775	0	0	0	0	0	0	0	0	0	0	0	0	0	0	0	0	0	0	0	37	0	0	0	0	0	0	Bacteria; Bacteroidetes; Flavobacteriia; Flavobacteriales; NS7 marine group; uncultured bacterium
776	33	2	129	119	167	42	0	236	360	221	149	42	82	170	80	98	25	910	1342	679	1420	1764	547	1043	931	947	Bacteria; Bacteroidetes; Flavobacteriia; Flavobacteriales; NS7 marine group; uncultured bacterium
777	0	0	0	0	0	0	0	0	0	0	0	0	0	0	0	0	0	18	0	0	0	0	0	0	0	0	Bacteria; Bacteroidetes; Flavobacteriia; Flavobacteriales; NS7 marine group; uncultured bacterium
778	0	0	0	0	0	0	0	0	0	0	0	0	0	0	0	0	0	0	0	0	0	22	0	0	0	0	Bacteria; Bacteroidetes; Flavobacteriia; Flavobacteriales; NS7 marine group; uncultured bacterium
779	0	0	0	0	0	0	0	0	0	0	0	0	0	0	0	0	0	0	0	0	0	0	0	0	20	0	Bacteria; Bacteroidetes; Flavobacteriia; Flavobacteriales; NS7 marine group; uncultured bacterium
780	0	0	0	0	0	0	0	0	0	0	0	0	0	1	0	0	9	0	9	0	0	0	0	0	17	0	Bacteria; Bacteroidetes; Flavobacteriia; Flavobacteriales; NS7 marine group; uncultured bacterium
781	0	0	0	0	0	0	0	0	0	0	0	0	0	0	0	0	0	0	1	1	24	0	0	0	0	0	Bacteria; Bacteroidetes; Flavobacteriia; Flavobacteriales; NS7 marine group; uncultured bacterium
782	0	0	0	0	0	0	0	0	0	0	0	0	0	0	0	0	0	0	0	0	0	0	0	0	1	0	Bacteria; Bacteroidetes; Flavobacteriia; Flavobacteriales; NS7 marine group; uncultured bacterium
783	0	0	0	0	0	0	0	0	0	0	0	0	0	0	0	0	0	0	0	0	1	0	0	0	0	0	Bacteria; Bacteroidetes; Flavobacteriia; Flavobacteriales; NS7 marine group; uncultured bacterium
784	0	0	0	0	0	0	0	0	0	0	0	0	0	0	0	0	0	1	0	0	0	0	0	0	0	0	Bacteria; Bacteroidetes; Flavobacteriia; Flavobacteriales; NS7 marine group; uncultured bacterium
785	0	0	0	0	0	0	0	0	0	0	0	0	0	0	1	0	0	0	0	1	0	0	0	0	0	0	Bacteria; Bacteroidetes; Flavobacteriia; Flavobacteriales; NS7 marine group; uncultured bacterium
786	0	0	0	0	0	0	0	0	0	0	0	0	0	0	0	0	0	0	0	0	0	0	0	0	4	0	Bacteria; Bacteroidetes; Flavobacteriia; Flavobacteriales; NS7 marine group; uncultured bacterium
787	0	0	0	0	0	0	0	0	0	0	0	0	0	0	0	0	0	0	17	0	0	0	0	0	0	0	Bacteria; Bacteroidetes; Flavobacteriia; Flavobacteriales; NS7 marine group; uncultured bacterium
788	0	0	0	0	0	0	0	0	0	0	0	0	0	0	0	0	0	0	0	0	0	0	0	0	0	1	Bacteria; Bacteroidetes; Flavobacteriia; Flavobacteriales; NS7 marine group; uncultured bacterium
789	0	0	0	0	0	0	0	0	0	0	0	0	0	0	0	0	0	0	0	0	26	0	0	0	0	0	Bacteria; Bacteroidetes; Flavobacteriia; Flavobacteriales; NS7 marine group; uncultured bacterium
790	0	0	0	0	0	0	0	0	0	0	0	0	0	0	0	0	0	0	0	1	0	0	0	0	0	0	Bacteria; Bacteroidetes; Flavobacteriia; Flavobacteriales; NS7 marine group; uncultured bacterium
791	0	0	0	0	0	0	0	0	0	0	0	0	0	0	0	0	0	0	7	7	0	0	0	0	0	0	Bacteria; Bacteroidetes; Flavobacteriia; Flavobacteriales; NS7 marine group; uncultured bacterium
792	0	0	0	0	0	0	0	0	0	0	0	0	0	0	0	0	0	0	0	0	0	0	0	0	1	0	Bacteria; Bacteroidetes; Flavobacteriia; Flavobacteriales; NS7 marine group; uncultured bacterium
793	0	0	0	0	0	0	0	0	0	0	0	0	0	0	0	0	0	0	0	0	0	1	0	0	0	0	Bacteria; Bacteroidetes; Flavobacteriia; Flavobacteriales; NS7 marine group; uncultured bacterium
794	0	0	0	0	0	0	0	0	0	0	0	0	0	0	0	0	0	0	0	0	0	3	0	0	0	0	Bacteria; Bacteroidetes; Flavobacteriia; Flavobacteriales; NS7 marine group; uncultured bacterium
795	0	0	0	0	0	0	0	0	0	0	0	0	0	0	0	0	0	52	0	0	0	0	0	0	0	2	Bacteria; Bacteroidetes; Flavobacteriia; Flavobacteriales; NS7 marine group; uncultured bacterium
796	0	0	0	0	0	0	0	0	0	0	0	0	0	0	0	0	0	0	0	1	0	0	0	0	0	0	Bacteria; Bacteroidetes; Flavobacteriia; Flavobacteriales; NS7 marine group; uncultured bacterium
797	0	0	0	0	0	0	0	0	0	0	0	0	0	0	0	0	0	0	0	0	0	0	0	0	1	0	Bacteria; Bacteroidetes; Flavobacteriia; Flavobacteriales; NS7 marine group; uncultured bacterium
798	0	0	0	0	0	0	0	0	0	0	0	0	0	0	0	0	0	0	0	0	0	0	0	1	0	0	Bacteria; Bacteroidetes; Flavobacteriia; Flavobacteriales; NS7 marine group; uncultured bacterium
799	0	0	0	0	0	0	0	0	0	0	0	0	0	0	0	0	0	0	0	0	0	0	0	0	1	0	Bacteria; Bacteroidetes; Flavobacteriia; Flavobacteriales; NS7 marine group; uncultured bacterium
800	0	0	0	0	0	0	0	0	0	0	0	0	0	0	0	0	0	1	0	0	0	0	0	0	0	0	Bacteria; Bacteroidetes; Flavobacteriia; Flavobacteriales; NS7 marine group; uncultured bacterium
801	0	0	0	0	0	0	0	0	0	0	0	0	0	0	0	0	0	0	1	0	0	0	0	0	0	0	Bacteria; Bacteroidetes; Flavobacteriia; Flavobacteriales; NS7 marine group; uncultured bacterium
802	0	0	0	0	0	0	0	0	0	0	0	0	0	0	0	0	0	0	0	0	0	3	0	0	0	0	Bacteria; Bacteroidetes; Flavobacteriia; Flavobacteriales; NS7 marine group; uncultured bacterium
803	0	0	0	0	0	0	0	0	0	0	0	0	0	0	0	0	0	0	0	0	0	3	0	0	0	0	Bacteria; Bacteroidetes; Flavobacteriia; Flavobacteriales; NS7 marine group; uncultured bacterium
804	0	0	0	0	0	0	0	0	0	0	0	0	0	0	0	0	0	0	0	0	0	0	1	0	0	0	Bacteria; Bacteroidetes; Flavobacteriia; Flavobacteriales; NS7 marine group; uncultured bacterium
805	0	0	0	0	0	0	0	0	0	0	0	0	0	0	0	0	0	0	1	0	0	0	0	0	0	0	Bacteria; Bacteroidetes; Flavobacteriia; Flavobacteriales; NS7 marine group; uncultured bacterium
806	0	0	0	0	0	0	0	0	0	0	0	0	0	0	0	0	0	0	0	0	0	46	0	0	0	0	Bacteria; Bacteroidetes; Flavobacteriia; Flavobacteriales; NS7 marine group; uncultured bacterium
807	31	0	0	407	0	186	92	0	279	235	83	219	585	0	0	0	0	0	0	162	0	12	0	0	0	0	Bacteria; Bacteroidetes; Flavobacteriia; Flavobacteriales; NS7 marine group; uncultured bacterium
808	0	0	0	0	0	0	0	0	0	0	0	0	0	0	0	0	0	0	0	0	0	0	1	0	0	0	Bacteria; Bacteroidetes; Flavobacteriia; Flavobacteriales; NS7 marine group; uncultured bacterium
809	0	0	0	0	0	0	0	0	0	0	0	0	0	0	0	0	0	0	0	0	0	4	0	0	0	0	Bacteria; Bacteroidetes; Flavobacteriia; Flavobacteriales; NS7 marine group; uncultured bacterium
810	0	0	0	0	0	0	0	0	0	0	0	0	0	0	0	0	0	20	0	40	0	0	1	0	0	0	Bacteria; Bacteroidetes; Flavobacteriia; Flavobacteriales; NS7 marine group; uncultured bacterium
811	0	0	0	0	0	0	0	0	0	0	0	0	0	0	0	0	0	2	0	0	0	0	0	0	0	0	Bacteria; Bacteroidetes; Flavobacteriia; Flavobacteriales; NS7 marine group; uncultured bacterium
812	0	0	0	0	0	0	0	0	0	0	0	0	0	0	0	0	0	0	0	0	0	0	0	0	1	0	Bacteria; Bacteroidetes; Flavobacteriia; Flavobacteriales; NS7 marine group; uncultured Bacteroidetes bacterium
813	0	0	0	0	0	0	0	0	0	0	0	0	0	0	0	0	0	0	0	0	0	0	0	0	0	1	Bacteria; Bacteroidetes; Flavobacteriia; Flavobacteriales; NS7 marine group; uncultured Bacteroidetes bacterium
814	0	0	0	0	0	0	0	0	0	0	0	0	0	0	0	0	0	0	0	0	0	0	0	0	0	22	Bacteria; Bacteroidetes; Flavobacteriia; Flavobacteriales; NS7 marine group; uncultured Bacteroidetes bacterium
815	0	0	0	0	0	0	0	0	0	0	0	0	2	0	0	0	0	0	0	0	0	0	0	0	0	0	Bacteria; Bacteroidetes; Flavobacteriia; Flavobacteriales; NS7 marine group; uncultured Bacteroidetes bacterium
816	0	0	0	0	0	0	0	5	0	0	0	0	0	0	3	0	0	0	0	0	0	0	0	0	0	0	Bacteria; Bacteroidetes; Flavobacteriia; Flavobacteriales; NS7 marine group; uncultured Bacteroidetes bacterium
817	0	0	0	0	0	0	0	0	0	0	0	0	0	0	0	0	0	1	0	0	0	0	0	0	0	0	Bacteria; Bacteroidetes; Flavobacteriia; Flavobacteriales; NS7 marine group; uncultured Bacteroidetes bacterium
818	0	0	0	0	0	0	0	0	0	0	0	0	0	0	0	0	0	0	0	0	0	0	0	0	0	1	Bacteria; Bacteroidetes; Flavobacteriia; Flavobacteriales; NS7 marine group; uncultured Bacteroidetes bacterium
819	0	0	0	46	0	0	0	13	0	0	0	3	0	0	0	0	0	0	22	0	0	0	0	0	0	24	Bacteria; Bacteroidetes; Flavobacteriia; Flavobacteriales; NS7 marine group; uncultured Cryomorphaceae bacterium
820	0	0	0	1	0	0	0	0	0	0	0	0	0	1	0	0	0	0	0	1	0	0	0	0	0	5	Bacteria; Bacteroidetes; Flavobacteriia; Flavobacteriales; NS7 marine group; uncultured Cryomorphaceae bacterium
821	0	0	0	0	0	0	0	0	0	0	0	0	0	0	0	0	0	0	0	0	0	7	0	0	0	0	Bacteria; Bacteroidetes; Flavobacteriia; Flavobacteriales; NS7 marine group; uncultured Cryomorphaceae bacterium
822	0	0	0	0	0	0	0	0	0	0	0	0	0	0	0	0	0	0	0	0	0	0	0	0	0	1	Bacteria; Bacteroidetes; Flavobacteriia; Flavobacteriales; NS9 marine group; marine metagenome
823	0	0	0	0	0	0	0	0	0	0	0	0	0	0	0	0	0	0	0	1	0	0	0	0	0	0	Bacteria; Bacteroidetes; Flavobacteriia; Flavobacteriales; NS9 marine group; uncultured bacterium
824	0	0	0	0	0	0	1	0	0	0	0	0	0	0	0	0	0	0	0	0	0	0	0	0	0	0	Bacteria; Bacteroidetes; Flavobacteriia; Flavobacteriales; NS9 marine group; uncultured bacterium
825	0	0	0	0	0	0	0	0	0	0	0	0	0	0	0	0	0	0	1	0	0	0	0	0	0	0	Bacteria; Bacteroidetes; Flavobacteriia; Flavobacteriales; NS9 marine group; uncultured bacterium
826	0	0	0	0	0	0	0	0	0	0	0	0	0	0	0	0	0	0	0	1	0	0	0	0	0	0	Bacteria; Bacteroidetes; Flavobacteriia; Flavobacteriales; NS9 marine group; uncultured bacterium
827	0	0	0	0	0	0	0	0	0	0	0	0	0	0	0	0	0	0	0	1	0	0	0	0	0	0	Bacteria; Bacteroidetes; Flavobacteriia; Flavobacteriales; NS9 marine group; uncultured bacterium
828	0	0	0	0	0	0	0	0	0	0	0	0	0	0	0	1	0	0	0	0	0	0	0	0	0	0	Bacteria; Bacteroidetes; Flavobacteriia; Flavobacteriales; NS9 marine group; uncultured bacterium
829	0	0	0	0	0	0	0	0	0	0	0	0	0	33	0	0	0	0	0	0	0	0	0	0	0	0	Bacteria; Bacteroidetes; Flavobacteriia; Flavobacteriales; NS9 marine group; uncultured bacterium
830	0	0	0	0	0	0	0	0	0	0	0	0	0	0	0	0	0	0	0	0	0	0	0	0	0	1	Bacteria; Bacteroidetes; Flavobacteriia; Flavobacteriales; NS9 marine group; uncultured bacterium
831	0	0	0	0	0	1	0	5	0	0	0	0	0	0	0	0	0	0	0	1	0	0	0	0	0	0	Bacteria; Bacteroidetes; Flavobacteriia; Flavobacteriales; NS9 marine group; uncultured bacterium
832	0	0	0	0	0	0	0	0	0	0	0	0	0	0	0	0	0	0	0	0	0	0	0	2	0	0	Bacteria; Bacteroidetes; Flavobacteriia; Flavobacteriales; NS9 marine group; uncultured bacterium
833	0	0	0	0	0	0	0	0	0	0	0	0	0	0	0	0	0	0	0	0	0	0	0	0	1	0	Bacteria; Bacteroidetes; Flavobacteriia; Flavobacteriales; NS9 marine group; uncultured bacterium
834	1	0	0	4	0	0	0	0	0	0	0	0	0	0	0	0	0	0	0	0	0	0	0	0	0	0	Bacteria; Bacteroidetes; Flavobacteriia; Flavobacteriales; NS9 marine group; uncultured bacterium
835	0	0	0	0	0	1	0	0	0	0	0	0	0	0	0	0	0	0	0	0	0	0	0	0	0	0	Bacteria; Bacteroidetes; Flavobacteriia; Flavobacteriales; NS9 marine group; uncultured bacterium
836	0	0	0	0	0	0	0	0	0	0	0	0	0	0	6	0	0	0	0	0	0	0	0	0	0	0	Bacteria; Bacteroidetes; Flavobacteriia; Flavobacteriales; NS9 marine group; uncultured bacterium
837	39	14	24	0	0	0	2	14	0	0	0	0	0	44	339	10	7	2	20	5	20	0	0	0	0	0	Bacteria; Bacteroidetes; Flavobacteriia; Flavobacteriales; NS9 marine group; uncultured bacterium
838	0	0	0	0	0	0	0	0	0	0	0	0	0	0	1	0	0	0	0	0	0	0	0	0	0	0	Bacteria; Bacteroidetes; Flavobacteriia; Flavobacteriales; NS9 marine group; uncultured bacterium
839	0	0	0	0	0	1	0	0	2	0	0	0	0	0	0	0	0	0	0	0	0	0	3	0	0	0	Bacteria; Bacteroidetes; Flavobacteriia; Flavobacteriales; NS9 marine group; uncultured bacterium
840	0	0	0	0	0	0	0	0	0	0	0	0	0	0	0	0	0	0	0	0	0	0	0	0	3	0	Bacteria; Bacteroidetes; Flavobacteriia; Flavobacteriales; NS9 marine group; uncultured bacterium
841	0	1	6	0	0	3	7	0	0	1	0	0	0	1	5	7	0	0	10	58	16	0	6	0	4	0	Bacteria; Bacteroidetes; Flavobacteriia; Flavobacteriales; NS9 marine group; uncultured bacterium
842	0	0	0	0	0	0	0	0	0	0	0	0	0	0	0	0	0	0	0	0	0	0	1	0	0	0	Bacteria; Bacteroidetes; Flavobacteriia; Flavobacteriales; NS9 marine group; uncultured bacterium
843	0	0	0	0	0	0	0	0	0	0	0	0	0	0	1	0	0	0	0	0	0	0	0	0	0	0	Bacteria; Bacteroidetes; Flavobacteriia; Flavobacteriales; NS9 marine group; uncultured bacterium
844	111	123	180	5	129	381	0	264	75	200	24	143	8	96	720	100	49	203	1280	719	727	165	408	74	351	20	Bacteria; Bacteroidetes; Flavobacteriia; Flavobacteriales; NS9 marine group; uncultured bacterium
845	0	0	0	0	0	0	1	0	0	0	0	0	0	0	0	0	0	0	0	1	0	0	0	0	0	0	Bacteria; Bacteroidetes; Flavobacteriia; Flavobacteriales; NS9 marine group; uncultured bacterium
846	0	0	0	0	0	0	0	0	0	0	0	0	0	0	0	0	0	0	0	0	0	0	0	0	0	1	Bacteria; Bacteroidetes; Flavobacteriia; Flavobacteriales; NS9 marine group; uncultured bacterium
847	0	0	0	0	0	0	0	0	0	0	0	0	0	0	0	0	0	0	0	16	0	0	0	0	0	0	Bacteria; Bacteroidetes; Flavobacteriia; Flavobacteriales; NS9 marine group; uncultured bacterium
848	0	0	0	0	0	0	0	0	0	0	0	0	0	0	0	0	0	0	0	1	0	0	0	0	0	0	Bacteria; Bacteroidetes; Flavobacteriia; Flavobacteriales; NS9 marine group; uncultured bacterium
849	0	0	0	0	0	0	1	0	0	0	0	0	0	0	0	0	0	0	0	0	0	0	0	0	0	0	Bacteria; Bacteroidetes; Flavobacteriia; Flavobacteriales; NS9 marine group; uncultured bacterium
850	0	0	0	0	0	0	0	0	0	0	0	0	0	0	0	0	0	0	0	0	0	0	0	0	10	0	Bacteria; Bacteroidetes; Flavobacteriia; Flavobacteriales; NS9 marine group; uncultured bacterium
851	0	0	0	0	0	0	0	0	0	0	0	0	0	0	0	0	0	1	0	0	0	0	0	0	0	0	Bacteria; Bacteroidetes; Flavobacteriia; Flavobacteriales; NS9 marine group; uncultured bacterium
852	0	0	2	0	0	0	0	0	0	0	0	0	0	2	70	1	0	0	0	0	0	0	0	1	0	0	Bacteria; Bacteroidetes; Flavobacteriia; Flavobacteriales; NS9 marine group; uncultured bacterium
853	0	0	0	0	0	0	0	0	0	0	0	0	0	0	0	0	0	0	0	1	0	0	0	0	0	0	Bacteria; Bacteroidetes; Flavobacteriia; Flavobacteriales; NS9 marine group; uncultured bacterium
854	0	0	0	0	0	0	0	0	4	11	0	0	0	0	0	0	0	0	0	0	0	1	40	2	2	0	Bacteria; Bacteroidetes; Flavobacteriia; Flavobacteriales; NS9 marine group; uncultured bacterium
855	0	0	0	0	0	0	0	0	0	0	0	0	0	0	0	0	0	0	1	0	0	0	2	0	0	0	Bacteria; Bacteroidetes; Flavobacteriia; Flavobacteriales; NS9 marine group; uncultured bacterium
856	0	0	0	0	0	0	0	0	0	0	0	0	0	0	1	0	0	0	0	0	0	0	0	0	0	0	Bacteria; Bacteroidetes; Flavobacteriia; Flavobacteriales; NS9 marine group; uncultured bacterium
857	0	0	0	0	0	0	0	0	0	0	0	0	0	0	1	0	0	0	0	0	0	0	0	0	0	0	Bacteria; Bacteroidetes; Flavobacteriia; Flavobacteriales; NS9 marine group; uncultured bacterium
858	0	0	0	0	0	0	0	0	0	0	0	0	0	4	0	1	0	0	0	1	0	0	0	0	0	0	Bacteria; Bacteroidetes; Flavobacteriia; Flavobacteriales; NS9 marine group; uncultured bacterium
859	0	0	0	0	0	0	0	0	0	0	0	0	0	0	0	0	0	1	0	0	0	0	0	0	0	0	Bacteria; Bacteroidetes; Flavobacteriia; Flavobacteriales; NS9 marine group; uncultured bacterium
860	0	0	0	0	0	0	0	0	0	0	0	0	0	0	0	0	0	0	0	0	0	0	1	0	0	0	Bacteria; Bacteroidetes; Flavobacteriia; Flavobacteriales; NS9 marine group; uncultured bacterium
861	0	0	0	0	0	0	0	0	0	0	0	0	0	0	0	0	0	0	1	0	0	0	0	0	0	0	Bacteria; Bacteroidetes; Flavobacteriia; Flavobacteriales; NS9 marine group; uncultured bacterium
862	0	0	0	0	0	0	0	0	0	0	0	0	1	0	0	0	0	0	0	0	0	0	0	0	0	0	Bacteria; Bacteroidetes; Flavobacteriia; Flavobacteriales; NS9 marine group; uncultured bacterium
863	0	0	0	0	0	0	0	0	0	0	0	0	0	0	0	0	0	0	0	0	0	0	0	0	0	1	Bacteria; Bacteroidetes; Flavobacteriia; Flavobacteriales; NS9 marine group; uncultured bacterium
864	0	0	0	0	0	0	0	0	0	0	0	0	0	0	0	1	0	0	0	0	5	0	0	0	0	0	Bacteria; Bacteroidetes; Flavobacteriia; Flavobacteriales; NS9 marine group; uncultured bacterium
865	0	0	0	0	0	0	0	0	0	0	0	0	0	0	1	0	0	0	0	0	0	0	0	0	0	0	Bacteria; Bacteroidetes; Flavobacteriia; Flavobacteriales; NS9 marine group; uncultured bacterium
866	0	0	0	0	0	2	0	0	0	0	0	1	0	0	0	0	0	0	0	0	0	0	5	0	0	0	Bacteria; Bacteroidetes; Flavobacteriia; Flavobacteriales; NS9 marine group; uncultured bacterium
867	0	0	0	0	0	0	0	0	0	0	0	0	0	0	12	0	0	0	0	0	0	0	0	0	0	0	Bacteria; Bacteroidetes; Flavobacteriia; Flavobacteriales; NS9 marine group; uncultured bacterium
868	0	0	0	1	0	0	0	0	0	0	0	0	0	0	0	0	0	7	0	0	0	0	1	0	0	0	Bacteria; Bacteroidetes; Flavobacteriia; Flavobacteriales; NS9 marine group; uncultured bacterium
869	0	0	0	0	0	0	0	0	0	0	0	0	0	0	0	0	0	0	0	0	5	0	0	0	0	0	Bacteria; Bacteroidetes; Flavobacteriia; Flavobacteriales; NS9 marine group; uncultured bacterium
870	0	0	0	0	0	0	0	0	0	0	0	0	0	0	1	0	0	0	0	0	0	0	0	0	0	0	Bacteria; Bacteroidetes; Flavobacteriia; Flavobacteriales; NS9 marine group; uncultured bacterium
871	0	0	0	0	0	0	0	0	0	0	0	0	0	0	7	0	0	0	0	0	0	0	1	0	0	0	Bacteria; Bacteroidetes; Flavobacteriia; Flavobacteriales; NS9 marine group; uncultured bacterium
872	0	0	0	0	0	0	0	0	0	0	0	0	0	0	0	1	0	0	0	0	0	0	0	0	0	0	Bacteria; Bacteroidetes; Flavobacteriia; Flavobacteriales; NS9 marine group; uncultured bacterium
873	0	0	0	0	0	0	0	0	0	0	0	0	0	0	0	0	0	0	2	0	0	0	0	0	0	0	Bacteria; Bacteroidetes; Flavobacteriia; Flavobacteriales; NS9 marine group; uncultured bacterium
874	0	0	0	7	0	0	1	13	0	0	0	0	0	0	0	0	0	0	0	0	0	0	0	0	13	1	Bacteria; Bacteroidetes; Flavobacteriia; Flavobacteriales; NS9 marine group; uncultured bacterium
875	0	0	0	0	0	0	0	0	0	0	0	0	0	0	1	0	0	0	0	0	0	0	0	0	0	0	Bacteria; Bacteroidetes; Flavobacteriia; Flavobacteriales; NS9 marine group; uncultured bacterium
876	0	0	0	0	0	0	0	0	0	0	0	0	0	0	0	0	0	1	0	0	0	0	0	0	0	0	Bacteria; Bacteroidetes; Flavobacteriia; Flavobacteriales; NS9 marine group; uncultured bacterium
877	0	0	0	0	0	0	1	0	0	0	13	0	0	11	0	0	0	0	0	0	22	0	0	0	0	0	Bacteria; Bacteroidetes; Flavobacteriia; Flavobacteriales; NS9 marine group; uncultured bacterium
878	0	0	0	0	0	0	0	0	0	0	0	0	0	0	0	0	0	0	2	0	0	0	0	0	0	0	Bacteria; Bacteroidetes; Flavobacteriia; Flavobacteriales; NS9 marine group; uncultured bacterium
879	0	0	0	0	0	0	0	0	0	0	0	0	0	0	0	0	0	8	0	0	0	0	0	0	0	0	Bacteria; Bacteroidetes; Flavobacteriia; Flavobacteriales; NS9 marine group; uncultured bacterium
880	0	0	0	0	0	1	0	0	0	0	0	0	0	0	0	0	0	0	0	0	0	0	0	0	0	0	Bacteria; Bacteroidetes; Flavobacteriia; Flavobacteriales; NS9 marine group; uncultured Bacteroidetes bacterium
881	0	0	0	0	0	0	0	0	0	0	0	0	0	0	0	0	0	0	0	20	0	0	0	0	0	0	Bacteria; Bacteroidetes; Flavobacteriia; Flavobacteriales; NS9 marine group; uncultured Bacteroidetes bacterium
882	0	0	17	1	8	29	3	37	0	0	0	0	0	0	2	11	0	26	126	126	109	0	0	5	3	1	Bacteria; Bacteroidetes; Flavobacteriia; Flavobacteriales; NS9 marine group; uncultured Bacteroidetes bacterium
883	0	0	0	0	0	0	0	0	0	0	0	0	0	0	0	0	0	1	0	0	0	0	0	0	0	0	Bacteria; Bacteroidetes; Flavobacteriia; Flavobacteriales; NS9 marine group; uncultured Bacteroidetes bacterium
884	0	0	0	0	0	0	0	0	0	0	0	0	0	0	0	0	0	0	0	1	0	0	0	0	0	0	Bacteria; Bacteroidetes; Flavobacteriia; Flavobacteriales; NS9 marine group; uncultured Bacteroidetes bacterium
885	0	0	0	0	0	0	0	0	0	0	0	0	0	0	0	0	0	0	0	1	0	0	0	0	0	0	Bacteria; Bacteroidetes; Flavobacteriia; Flavobacteriales; NS9 marine group; uncultured Bacteroidetes bacterium
886	0	0	12	0	0	5	0	0	0	0	0	0	0	0	0	1	0	0	14	1	1	0	0	0	0	0	Bacteria; Bacteroidetes; Flavobacteriia; Flavobacteriales; NS9 marine group; uncultured Bacteroidetes bacterium
887	0	0	0	0	0	0	0	0	0	0	0	0	0	1	0	4	2	0	0	0	0	0	0	0	0	0	Bacteria; Bacteroidetes; Flavobacteriia; Flavobacteriales; NS9 marine group; uncultured Bacteroidetes bacterium
888	0	0	0	0	0	0	0	0	0	0	1	0	0	0	0	0	0	0	0	0	0	0	0	0	0	0	Bacteria; Bacteroidetes; Flavobacteriia; Flavobacteriales; NS9 marine group; uncultured Bacteroidetes bacterium
889	0	0	0	0	0	0	0	0	0	0	0	0	0	0	0	0	0	0	1	0	0	0	0	0	0	0	Bacteria; Bacteroidetes; Flavobacteriia; Flavobacteriales; NS9 marine group; uncultured Bacteroidetes bacterium
890	0	0	0	0	0	0	0	0	0	0	0	0	0	0	0	0	0	0	0	0	4	0	0	0	0	0	Bacteria; Bacteroidetes; Flavobacteriia; Flavobacteriales; NS9 marine group; uncultured Bacteroidetes bacterium
891	0	0	0	0	0	0	0	0	0	1	0	0	0	0	0	0	0	0	0	0	0	0	0	0	0	0	Bacteria; Bacteroidetes; Flavobacteriia; Flavobacteriales; NS9 marine group; uncultured Bacteroidetes bacterium
892	0	0	0	0	0	0	0	0	0	0	0	0	0	1	0	0	0	0	0	0	0	0	0	0	0	0	Bacteria; Bacteroidetes; Flavobacteriia; Flavobacteriales; NS9 marine group; uncultured Bacteroidetes/Chlorobi group bacterium
893	2	6	8	0	7	1	3	16	0	0	0	2	1	100	10	1	1	27	100	36	53	0	2	0	3	0	Bacteria; Bacteroidetes; Flavobacteriia; Flavobacteriales; NS9 marine group; uncultured Flavobacteriales bacterium
894	0	0	0	0	0	0	0	0	0	0	2	0	0	0	1	0	4	0	0	0	0	0	1	0	0	0	Bacteria; Bacteroidetes; Flavobacteriia; Flavobacteriales; NS9 marine group; uncultured Flavobacteriales bacterium
895	0	0	0	0	0	0	0	0	0	0	0	0	0	0	0	0	0	2	0	0	0	0	0	0	0	0	Bacteria; Bacteroidetes; Flavobacteriia; Flavobacteriales; NS9 marine group; uncultured Flavobacteriales bacterium
896	2	0	3	0	0	5	0	0	0	0	4	0	0	7	58	0	0	0	0	0	0	0	0	3	0	0	Bacteria; Bacteroidetes; Flavobacteriia; Flavobacteriales; NS9 marine group; uncultured Flavobacteriia bacterium
897	0	0	0	0	0	0	0	0	0	0	0	0	0	0	4	0	0	0	0	0	0	0	0	0	0	0	Bacteria; Bacteroidetes; Flavobacteriia; Flavobacteriales; NS9 marine group; uncultured Flavobacteriia bacterium
898	0	0	0	0	0	0	0	0	0	0	0	0	0	0	0	0	0	0	1	0	0	0	0	0	0	0	Bacteria; Bacteroidetes; Flavobacteriia; Flavobacteriales; NS9 marine group; uncultured Flavobacteriia bacterium
899	0	0	0	0	0	0	0	0	0	0	0	0	0	0	5	0	0	0	0	0	0	0	0	0	0	0	Bacteria; Bacteroidetes; Flavobacteriia; Flavobacteriales; NS9 marine group; uncultured Flavobacteriia bacterium
900	13	4	7	33	2	39	0	12	0	2	42	0	35	41	4	9	0	4	295	127	83	5	0	44	3	35	Bacteria; Bacteroidetes; Flavobacteriia; Flavobacteriales; NS9 marine group; uncultured marine bacterium
901	0	0	0	0	0	0	0	0	0	0	0	0	0	0	0	0	0	0	1	0	0	0	0	0	0	0	Bacteria; Bacteroidetes; Flavobacteriia; Flavobacteriales; NS9 marine group; uncultured marine bacterium
902	0	0	0	0	0	0	0	0	0	0	0	0	0	0	0	0	0	1	0	0	0	0	0	0	0	0	Bacteria; Bacteroidetes; Flavobacteriia; Flavobacteriales; NS9 marine group; uncultured marine bacterium
903	0	0	0	0	0	0	0	0	0	0	0	0	0	0	0	0	0	1	0	0	0	0	0	0	0	0	Bacteria; Bacteroidetes; Flavobacteriia; Flavobacteriales; NS9 marine group; uncultured marine bacterium
904	0	0	0	0	0	0	0	0	0	0	0	0	0	0	1	0	0	0	0	0	0	0	0	0	0	0	Bacteria; Bacteroidetes; Flavobacteriia; Flavobacteriales; NS9 marine group; uncultured marine bacterium
905	0	0	0	0	0	0	0	0	0	0	0	0	0	0	0	0	0	0	0	0	0	0	1	0	0	0	Bacteria; Bacteroidetes; Flavobacteriia; Flavobacteriales; NS9 marine group; uncultured marine bacterium
906	0	1	0	0	0	1	0	0	0	0	0	0	0	0	0	0	0	0	0	0	0	0	0	0	0	0	Bacteria; Bacteroidetes; Flavobacteriia; Flavobacteriales; NS9 marine group; uncultured marine bacterium
907	0	0	0	0	0	0	0	0	0	0	0	0	0	0	0	0	0	0	0	0	0	0	1	0	0	0	Bacteria; Bacteroidetes; Flavobacteriia; Flavobacteriales; NS9 marine group; uncultured marine bacterium
908	0	0	0	0	0	0	0	0	0	0	0	0	0	0	0	0	0	0	0	0	3	0	0	0	0	0	Bacteria; Bacteroidetes; Flavobacteriia; Flavobacteriales; NS9 marine group; uncultured marine bacterium
909	0	0	0	0	0	0	0	0	0	0	0	0	0	0	0	0	0	0	0	0	0	0	0	0	0	1	Bacteria; Bacteroidetes; Flavobacteriia; Flavobacteriales; NS9 marine group; uncultured marine bacterium
910	4	1	0	221	0	1	0	0	11	0	6	5	147	28	6	0	0	3	31	4	0	17	0	29	16	253	Bacteria; Bacteroidetes; Flavobacteriia; Flavobacteriales; NS9 marine group; uncultured marine bacterium
911	0	0	0	0	0	0	0	0	0	0	0	0	0	0	0	0	0	0	2	0	0	0	0	0	0	0	Bacteria; Bacteroidetes; Flavobacteriia; Flavobacteriales; NS9 marine group; uncultured marine bacterium
912	0	0	0	0	0	0	0	0	0	0	0	0	0	0	0	0	0	0	0	0	0	0	1	0	0	0	Bacteria; Bacteroidetes; Flavobacteriia; Flavobacteriales; NS9 marine group; uncultured marine bacterium
913	1	0	0	0	0	0	0	0	0	0	0	0	0	0	0	0	0	0	0	0	0	0	0	0	0	0	Bacteria; Bacteroidetes; Flavobacteriia; Flavobacteriales; NS9 marine group; uncultured marine bacterium
914	0	0	0	0	0	0	0	0	0	0	0	0	0	0	0	0	0	0	1	0	0	0	0	0	0	0	Bacteria; Bacteroidetes; SB-1; uncultured bacterium
915	0	0	0	0	0	0	0	0	0	0	0	0	0	0	1	0	0	0	0	0	0	0	0	0	0	0	Bacteria; Bacteroidetes; SB-1; uncultured bacterium
916	0	0	0	0	0	0	0	0	0	0	0	0	0	0	0	0	0	0	0	1	0	0	0	0	0	0	Bacteria; Bacteroidetes; SB-1; uncultured bacterium
917	0	0	0	0	0	0	0	0	0	0	0	0	0	0	1	0	0	0	0	0	0	0	0	0	0	0	Bacteria; Bacteroidetes; SB-1; uncultured bacterium
918	0	0	0	0	0	0	0	0	0	0	0	0	0	0	0	0	0	0	0	1	1	0	0	0	0	0	Bacteria; Bacteroidetes; SB-1; uncultured bacterium
919	0	0	0	0	0	0	0	0	0	0	0	0	0	0	2	0	0	0	0	1	0	0	0	0	0	0	Bacteria; Bacteroidetes; SB-1; uncultured bacterium
920	0	0	0	0	0	0	0	0	0	0	0	0	0	0	0	0	0	0	0	1	0	0	0	0	0	0	Bacteria; Bacteroidetes; SB-5; uncultured bacterium
921	0	0	0	0	0	0	0	0	0	0	1	0	0	0	0	0	0	0	0	0	0	0	0	0	0	0	Bacteria; Bacteroidetes; Sphingobacteriia; Sphingobacteriales; Chitinophagaceae; uncultured; uncultured bacterium
922	0	0	0	0	0	0	0	0	0	0	0	0	0	0	0	0	0	0	1	0	0	0	0	0	0	0	Bacteria; Bacteroidetes; Sphingobacteriia; Sphingobacteriales; Chitinophagaceae; uncultured; uncultured bacterium
923	0	0	0	0	0	0	0	0	0	0	0	0	0	0	0	0	0	0	0	0	0	0	1	0	0	0	Bacteria; Bacteroidetes; Sphingobacteriia; Sphingobacteriales; Chitinophagaceae; uncultured; uncultured bacterium
924	0	0	0	0	0	0	0	0	0	0	0	0	0	0	0	0	0	0	0	0	0	0	2	1	0	0	Bacteria; Bacteroidetes; Sphingobacteriia; Sphingobacteriales; Chitinophagaceae; uncultured; uncultured bacterium
925	0	0	0	0	0	0	0	0	0	2	0	0	0	0	0	0	0	0	0	0	0	0	0	0	0	0	Bacteria; Bacteroidetes; Sphingobacteriia; Sphingobacteriales; Chitinophagaceae; uncultured; uncultured bacterium
926	0	0	0	0	0	0	0	0	0	0	0	0	0	0	1	0	0	0	0	0	0	0	0	0	0	0	Bacteria; Bacteroidetes; Sphingobacteriia; Sphingobacteriales; Chitinophagaceae; uncultured; uncultured Bacteroidetes bacterium
927	0	0	0	0	0	0	0	0	0	0	0	0	0	0	0	0	0	0	0	0	0	1	0	0	0	0	Bacteria; Bacteroidetes; Sphingobacteriia; Sphingobacteriales; Chitinophagaceae; uncultured; uncultured Bacteroidetes bacterium
928	0	0	0	0	0	0	0	0	0	0	0	0	0	0	0	0	0	0	0	0	0	0	0	1	0	0	Bacteria; Bacteroidetes; Sphingobacteriia; Sphingobacteriales; Chitinophagaceae; uncultured; uncultured Bacteroidetes bacterium
929	0	0	0	0	0	0	0	0	0	0	0	0	0	0	0	0	0	0	0	0	0	0	0	0	1	0	Bacteria; Bacteroidetes; Sphingobacteriia; Sphingobacteriales; Chitinophagaceae; uncultured; uncultured Bacteroidetes bacterium
930	0	0	0	61	1	2	0	0	1	4	8	7	75	0	0	0	0	0	3	0	0	6	0	0	0	15	Bacteria; Bacteroidetes; Sphingobacteriia; Sphingobacteriales; Chitinophagaceae; uncultured; uncultured Bacteroidetes bacterium
931	0	0	0	0	0	0	0	0	0	0	0	0	0	0	0	0	0	0	0	0	0	0	1	0	0	0	Bacteria; Bacteroidetes; Sphingobacteriia; Sphingobacteriales; Chitinophagaceae; uncultured; uncultured Bacteroidetes bacterium
932	0	0	0	1	0	0	0	0	0	0	0	0	0	0	0	0	0	0	0	0	0	0	1	0	2	0	Bacteria; Bacteroidetes; Sphingobacteriia; Sphingobacteriales; Chitinophagaceae; uncultured; uncultured Bacteroidetes bacterium
933	0	0	0	0	0	0	0	0	3	0	2	5	3	0	0	0	0	2	3	1	0	0	2	2	2	2	Bacteria; Bacteroidetes; Sphingobacteriia; Sphingobacteriales; Chitinophagaceae; uncultured; uncultured Bacteroidetes bacterium
934	0	0	0	0	0	0	0	0	0	0	0	0	0	0	1	0	0	0	0	0	0	0	0	0	0	0	Bacteria; Bacteroidetes; Sphingobacteriia; Sphingobacteriales; Chitinophagaceae; uncultured; uncultured Bacteroidetes bacterium
935	0	0	0	0	0	0	0	1	1	21	0	0	0	0	0	0	0	0	0	0	0	0	2	0	0	0	Bacteria; Bacteroidetes; Sphingobacteriia; Sphingobacteriales; Chitinophagaceae; uncultured; uncultured Bacteroidetes/Chlorobi group bacterium
936	0	0	0	0	0	5	0	7	0	0	0	0	0	0	0	0	0	0	0	13	25	0	0	0	0	0	Bacteria; Bacteroidetes; Sphingobacteriia; Sphingobacteriales; KD3-93; uncultured bacterium
937	0	0	0	0	0	0	0	0	0	0	0	0	0	0	0	0	0	0	1	0	0	0	0	0	0	0	Bacteria; Bacteroidetes; Sphingobacteriia; Sphingobacteriales; KD3-93; uncultured bacterium
938	1	0	0	0	0	0	0	0	0	0	0	0	0	0	0	0	0	0	0	0	0	0	0	0	0	0	Bacteria; Bacteroidetes; Sphingobacteriia; Sphingobacteriales; KD3-93; uncultured bacterium
939	0	0	0	0	0	0	1	0	0	0	0	0	0	0	0	0	0	0	0	0	0	0	0	0	0	0	Bacteria; Bacteroidetes; Sphingobacteriia; Sphingobacteriales; KD3-93; uncultured bacterium
940	1	0	0	0	0	0	0	0	0	0	0	0	0	0	1	0	0	0	0	0	0	0	0	0	0	0	Bacteria; Bacteroidetes; Sphingobacteriia; Sphingobacteriales; KD3-93; uncultured Bacteroidetes bacterium
941	1	0	0	0	0	0	0	0	0	0	0	0	0	0	0	0	0	0	0	0	0	0	0	0	0	0	Bacteria; Bacteroidetes; Sphingobacteriia; Sphingobacteriales; KD3-93; uncultured Bacteroidetes bacterium
942	0	0	0	0	0	0	0	0	0	0	0	0	0	4	0	0	0	0	1	0	0	0	0	0	0	0	Bacteria; Bacteroidetes; Sphingobacteriia; Sphingobacteriales; KD3-93; uncultured Bacteroidetes bacterium
943	0	0	0	0	0	0	0	0	0	0	0	0	0	0	0	0	0	0	0	1	0	0	0	0	0	0	Bacteria; Bacteroidetes; Sphingobacteriia; Sphingobacteriales; KD3-93; uncultured Bacteroidetes bacterium
944	0	0	0	0	0	0	0	5	0	0	0	0	0	0	0	0	0	0	0	0	0	0	0	0	0	0	Bacteria; Bacteroidetes; Sphingobacteriia; Sphingobacteriales; NS11-12 marine group; uncultured bacterium
945	1	3	0	0	0	0	0	0	0	0	0	0	0	1	9	1	3	0	9	1	0	1	0	0	0	0	Bacteria; Bacteroidetes; Sphingobacteriia; Sphingobacteriales; NS11-12 marine group; uncultured Bacteroidetes bacterium
946	0	0	10	0	0	0	0	0	0	0	0	0	0	0	0	1	0	0	0	0	0	0	0	1	0	0	Bacteria; Bacteroidetes; Sphingobacteriia; Sphingobacteriales; NS11-12 marine group; uncultured Bacteroidetes bacterium
947	4	0	0	0	0	0	4	0	0	9	0	0	0	1	0	1	0	0	0	0	0	0	0	0	0	0	Bacteria; Bacteroidetes; Sphingobacteriia; Sphingobacteriales; NS11-12 marine group; uncultured Bacteroidetes bacterium
948	0	0	0	0	0	0	0	0	0	0	0	0	0	0	0	0	0	0	0	1	0	0	0	0	0	0	Bacteria; Bacteroidetes; Sphingobacteriia; Sphingobacteriales; NS11-12 marine group; uncultured marine bacterium
949	0	0	0	0	0	0	0	0	0	0	0	0	0	0	0	0	0	0	0	0	0	0	1	1	0	0	Bacteria; Bacteroidetes; Sphingobacteriia; Sphingobacteriales; NS11-12 marine group; unidentified marine bacterioplankton
950	0	0	0	0	0	1	0	0	1	0	0	0	0	0	0	0	0	0	0	0	0	0	0	0	0	0	Bacteria; Bacteroidetes; Sphingobacteriia; Sphingobacteriales; NS11-12 marine group; unidentified marine bacterioplankton
951	0	0	0	0	0	0	0	0	0	0	0	0	0	0	0	0	0	0	0	0	0	0	1	0	0	0	Bacteria; Bacteroidetes; Sphingobacteriia; Sphingobacteriales; NS11-12 marine group; unidentified marine bacterioplankton
952	0	12	17	1	31	68	29	46	65	142	20	42	2	1	0	7	8	19	34	49	28	31	40	3	11	0	Bacteria; Bacteroidetes; Sphingobacteriia; Sphingobacteriales; NS11-12 marine group; unidentified marine bacterioplankton
953	0	0	0	0	0	0	0	0	0	0	0	0	0	1	0	0	0	0	1	0	0	0	0	0	0	0	Bacteria; Bacteroidetes; Sphingobacteriia; Sphingobacteriales; NS11-12 marine group; unidentified marine bacterioplankton
954	0	0	0	0	0	0	0	0	0	0	0	0	0	0	0	0	0	0	0	0	0	0	1	0	0	0	Bacteria; Bacteroidetes; Sphingobacteriia; Sphingobacteriales; NS11-12 marine group; unidentified marine bacterioplankton
955	0	0	0	0	0	0	0	0	0	0	0	0	0	0	0	0	0	0	0	0	0	0	1	0	0	0	Bacteria; Bacteroidetes; Sphingobacteriia; Sphingobacteriales; NS11-12 marine group; unidentified marine bacterioplankton
956	0	0	0	0	1	0	0	0	0	0	0	1	0	0	0	0	0	0	5	1	0	0	2	1	1	0	Bacteria; Bacteroidetes; Sphingobacteriia; Sphingobacteriales; Saprospiraceae; Aureispira; Saprospira sp. CNJ640
957	0	0	0	0	0	0	0	0	0	0	0	0	0	0	0	0	0	0	0	0	0	0	0	0	1	0	Bacteria; Bacteroidetes; Sphingobacteriia; Sphingobacteriales; Saprospiraceae; Aureispira; Saprospira sp. CNJ640
958	0	0	0	0	0	0	0	0	0	0	0	0	0	0	0	0	0	1	0	0	0	0	0	0	0	0	Bacteria; Bacteroidetes; Sphingobacteriia; Sphingobacteriales; Saprospiraceae; Aureispira; Saprospira sp. CNJ640
959	0	0	0	0	0	0	0	0	0	0	0	0	0	0	0	0	0	0	0	0	0	0	0	0	0	1	Bacteria; Bacteroidetes; Sphingobacteriia; Sphingobacteriales; Saprospiraceae; Aureispira; Saprospira sp. CNJ640
960	0	0	0	0	0	0	0	0	0	0	0	0	0	0	0	0	0	0	0	1	0	0	0	0	0	0	Bacteria; Bacteroidetes; Sphingobacteriia; Sphingobacteriales; Saprospiraceae; Aureispira; uncultured bacterium
961	0	0	0	0	0	0	0	0	0	0	0	0	0	0	0	0	0	0	0	0	1	0	0	0	0	0	Bacteria; Bacteroidetes; Sphingobacteriia; Sphingobacteriales; Saprospiraceae; Aureispira; uncultured bacterium
962	0	0	0	0	0	0	0	0	0	0	0	0	0	0	0	0	0	0	0	1	0	0	0	0	0	0	Bacteria; Bacteroidetes; Sphingobacteriia; Sphingobacteriales; Saprospiraceae; Aureispira; uncultured bacterium
963	3	0	0	0	0	0	0	0	1	2	0	1	0	1	0	0	0	1	0	0	0	0	0	0	0	0	Bacteria; Bacteroidetes; Sphingobacteriia; Sphingobacteriales; Saprospiraceae; Aureispira; uncultured Bacteroidetes bacterium
964	0	0	0	0	0	0	0	0	0	0	0	0	0	0	0	0	0	0	0	1	0	0	0	0	0	0	Bacteria; Bacteroidetes; Sphingobacteriia; Sphingobacteriales; Saprospiraceae; Aureispira; uncultured Bacteroidetes bacterium
965	0	0	0	0	0	0	0	0	0	0	0	0	0	0	0	0	0	0	0	1	0	10	0	0	0	0	Bacteria; Bacteroidetes; Sphingobacteriia; Sphingobacteriales; Saprospiraceae; Aureispira; uncultured Bacteroidetes bacterium
966	0	10	3	0	2	5	1	7	2	2	0	1	0	9	84	2	0	0	19	18	7	0	1	0	1	1	Bacteria; Bacteroidetes; Sphingobacteriia; Sphingobacteriales; Saprospiraceae; Aureispira; uncultured Bacteroidetes bacterium
967	0	0	0	0	0	0	0	0	0	0	0	0	0	0	0	0	0	0	0	0	0	0	1	0	0	0	Bacteria; Bacteroidetes; Sphingobacteriia; Sphingobacteriales; Saprospiraceae; Aureispira; uncultured Bacteroidetes bacterium
968	0	0	0	0	0	2	0	0	0	0	0	0	0	0	0	0	0	0	0	0	0	0	0	0	0	0	Bacteria; Bacteroidetes; Sphingobacteriia; Sphingobacteriales; Saprospiraceae; Aureispira; uncultured Bacteroidetes bacterium
969	0	0	0	0	0	0	0	0	0	0	0	0	0	0	0	0	0	0	0	0	0	0	1	0	0	0	Bacteria; Bacteroidetes; Sphingobacteriia; Sphingobacteriales; Saprospiraceae; Aureispira; uncultured Bacteroidetes bacterium
970	0	0	0	0	0	0	0	0	0	0	0	0	0	0	0	0	0	0	0	0	0	0	1	0	0	0	Bacteria; Bacteroidetes; Sphingobacteriia; Sphingobacteriales; Saprospiraceae; Aureispira; uncultured Bacteroidetes bacterium
971	0	0	0	0	0	0	0	0	0	0	0	0	0	0	0	1	0	0	0	0	0	0	0	0	0	0	Bacteria; Bacteroidetes; Sphingobacteriia; Sphingobacteriales; Saprospiraceae; Aureispira; uncultured Bacteroidetes bacterium
972	0	0	0	0	0	0	0	0	0	0	0	0	0	0	0	0	0	1	0	0	0	0	0	0	0	0	Bacteria; Bacteroidetes; Sphingobacteriia; Sphingobacteriales; Saprospiraceae; Aureispira; uncultured Bacteroidetes bacterium
973	0	0	0	0	0	0	0	0	0	0	0	0	0	0	0	0	0	0	0	0	0	0	1	0	0	0	Bacteria; Bacteroidetes; Sphingobacteriia; Sphingobacteriales; Saprospiraceae; Lewinella; uncultured bacterium
974	0	0	0	0	0	0	0	0	3	0	0	0	0	0	0	0	0	0	0	1	0	10	0	0	0	0	Bacteria; Bacteroidetes; Sphingobacteriia; Sphingobacteriales; Saprospiraceae; Portibacter; uncultured bacterium
975	0	1	0	0	0	0	0	0	0	0	0	0	0	0	0	0	0	0	0	0	0	0	0	0	0	0	Bacteria; Bacteroidetes; Sphingobacteriia; Sphingobacteriales; Saprospiraceae; Rubidimonas; Rubidimonas crustatorum
976	0	0	0	0	0	0	0	0	0	0	0	0	0	0	1	0	0	0	0	0	0	0	0	0	0	0	Bacteria; Bacteroidetes; Sphingobacteriia; Sphingobacteriales; Saprospiraceae; Rubidimonas; uncultured bacterium
977	0	0	0	0	0	0	0	0	0	0	0	0	0	0	0	0	0	0	0	1	0	0	0	0	0	0	Bacteria; Bacteroidetes; Sphingobacteriia; Sphingobacteriales; Saprospiraceae; Rubidimonas; uncultured bacterium
978	0	0	0	0	1	0	0	0	0	0	0	0	0	1	1	0	0	0	0	0	0	0	0	0	0	0	Bacteria; Bacteroidetes; Sphingobacteriia; Sphingobacteriales; Saprospiraceae; Rubidimonas; uncultured bacterium
979	0	0	0	0	0	0	0	0	3	0	1	1	0	0	0	0	0	0	2	0	0	0	1	1	0	0	Bacteria; Bacteroidetes; Sphingobacteriia; Sphingobacteriales; Saprospiraceae; Saprospira; uncultured bacterium
980	0	0	0	0	0	0	0	0	0	0	0	0	0	0	1	0	0	0	0	0	0	0	0	0	0	0	Bacteria; Bacteroidetes; Sphingobacteriia; Sphingobacteriales; Saprospiraceae; uncultured; uncultured bacterium
981	0	0	0	0	0	1	0	0	15	0	0	3	0	2	2	0	0	1	0	0	0	18	0	0	4	0	Bacteria; Bacteroidetes; Sphingobacteriia; Sphingobacteriales; Saprospiraceae; uncultured; uncultured bacterium
982	0	0	0	0	0	0	0	0	0	0	0	0	0	0	0	0	0	0	1	0	0	0	0	0	0	0	Bacteria; Bacteroidetes; Sphingobacteriia; Sphingobacteriales; Saprospiraceae; uncultured; uncultured bacterium
983	0	0	0	0	0	0	0	0	0	0	0	0	0	0	1	0	0	0	0	0	0	0	0	0	0	0	Bacteria; Bacteroidetes; Sphingobacteriia; Sphingobacteriales; Saprospiraceae; uncultured; uncultured bacterium
984	0	0	0	0	0	0	0	1	0	1	0	0	0	0	0	0	0	0	2	1	0	0	0	0	0	0	Bacteria; Bacteroidetes; Sphingobacteriia; Sphingobacteriales; Saprospiraceae; uncultured; uncultured bacterium
985	0	0	0	9	0	0	0	0	0	0	1	0	11	0	0	0	0	0	0	0	0	0	0	0	0	0	Bacteria; Bacteroidetes; Sphingobacteriia; Sphingobacteriales; Saprospiraceae; uncultured; uncultured Bacteroidetes bacterium
986	0	0	0	4	0	0	0	0	0	0	0	1	1	0	0	0	0	0	0	0	0	0	0	0	1	33	Bacteria; Bacteroidetes; Sphingobacteriia; Sphingobacteriales; Saprospiraceae; uncultured; uncultured Bacteroidetes bacterium
987	0	0	0	0	0	0	0	0	0	0	0	0	0	0	0	0	0	0	0	0	0	0	0	0	0	1	Bacteria; Bacteroidetes; Sphingobacteriia; Sphingobacteriales; Saprospiraceae; uncultured; uncultured Bacteroidetes bacterium
988	0	0	0	0	0	0	0	0	0	0	0	0	0	0	0	0	0	0	0	0	0	0	0	0	0	1	Bacteria; Bacteroidetes; Sphingobacteriia; Sphingobacteriales; Saprospiraceae; uncultured; uncultured Bacteroidetes bacterium
989	0	6	0	0	0	1	0	0	3	0	0	1	0	0	0	0	0	0	0	0	0	0	0	0	0	0	Bacteria; Bacteroidetes; Sphingobacteriia; Sphingobacteriales; Saprospiraceae; uncultured; uncultured Saprospiraceae bacterium
990	9	0	0	1	0	0	0	0	0	0	3	0	0	0	0	0	0	0	0	0	0	0	0	0	0	0	Bacteria; Bacteroidetes; Sphingobacteriia; Sphingobacteriales; Saprospiraceae; uncultured; uncultured Saprospiraceae bacterium
991	0	18	31	0	9	43	21	51	19	0	7	24	1	1	14	7	1	2	33	38	27	0	2	0	1	0	Bacteria; Bacteroidetes; Sphingobacteriia; Sphingobacteriales; Saprospiraceae; uncultured; uncultured Saprospiraceae bacterium
992	0	0	0	0	0	0	0	0	0	12	0	0	1	2	0	0	0	0	0	0	0	11	1	0	0	0	Bacteria; Bacteroidetes; Sphingobacteriia; Sphingobacteriales; Saprospiraceae; uncultured; uncultured Saprospiraceae bacterium
993	0	0	0	0	0	1	0	0	0	0	0	0	0	0	0	0	0	0	0	0	0	1	0	0	0	0	Bacteria; Bacteroidetes; Sphingobacteriia; Sphingobacteriales; Saprospiraceae; uncultured; uncultured Sphingobacteria bacterium
994	0	0	0	0	0	0	0	0	0	0	0	0	0	0	0	0	0	0	0	1	0	0	0	0	0	0	Bacteria; Bacteroidetes; Sphingobacteriia; Sphingobacteriales; Saprospiraceae; uncultured; uncultured Sphingobacteria bacterium
995	0	0	0	0	0	1	0	0	0	0	0	0	0	0	0	0	0	0	0	0	0	0	0	0	0	0	Bacteria; Bacteroidetes; Sphingobacteriia; Sphingobacteriales; Saprospiraceae; uncultured; uncultured Sphingobacteria bacterium
996	6	0	0	0	0	1	2	5	4	0	4	0	0	0	0	0	0	2	1	3	0	0	0	1	1	2	Bacteria; Bacteroidetes; Sphingobacteriia; Sphingobacteriales; Saprospiraceae; uncultured; uncultured Sphingobacteria bacterium
997	0	0	0	0	0	0	0	0	0	0	0	0	0	0	0	0	0	0	0	1	0	0	0	0	0	0	Bacteria; Bacteroidetes; Sphingobacteriia; Sphingobacteriales; Saprospiraceae; uncultured; uncultured Sphingobacteria bacterium
998	0	0	0	0	0	0	0	0	0	0	0	1	0	0	0	0	0	0	0	0	0	0	0	0	0	0	Bacteria; Bacteroidetes; Sphingobacteriia; Sphingobacteriales; Saprospiraceae; uncultured; uncultured Sphingobacteria bacterium
999	0	0	0	0	0	0	0	0	0	0	0	0	0	0	0	0	0	1	0	0	0	0	0	0	0	0	Bacteria; Bacteroidetes; Sphingobacteriia; Sphingobacteriales; Saprospiraceae; uncultured; unidentified marine eubacterium
1000	0	0	0	0	0	0	0	0	0	0	0	0	1	0	0	0	0	0	0	0	0	0	0	0	0	0	Bacteria; Bacteroidetes; Sphingobacteriia; Sphingobacteriales; Sphingobacteriaceae; Mucilaginibacter; uncultured bacterium
1001	0	0	0	1	0	0	0	0	0	0	0	0	0	0	0	0	0	0	0	0	0	0	0	0	0	0	Bacteria; Bacteroidetes; Sphingobacteriia; Sphingobacteriales; Sphingobacteriaceae; Pedobacter; uncultured bacterium
1002	0	0	0	0	0	0	0	0	0	0	0	0	0	1	0	0	0	0	0	0	0	0	0	0	0	0	Bacteria; Bacteroidetes; Sphingobacteriia; Sphingobacteriales; Sphingobacteriaceae; Pedobacter; uncultured bacterium
1003	0	0	0	0	0	0	0	0	0	1	0	0	0	0	0	0	0	0	0	0	0	0	0	0	0	0	Bacteria; Bacteroidetes; Sphingobacteriia; Sphingobacteriales; Sphingobacteriaceae; Sphingobacterium; Sphingobacterium alimentarium
1004	0	0	0	0	0	0	0	0	0	0	0	0	0	0	0	0	0	0	0	0	1	0	0	0	0	0	Bacteria; Bacteroidetes; Sphingobacteriia; Sphingobacteriales; WCHB1-69; uncultured bacterium
1005	0	0	0	0	0	0	0	0	0	0	0	0	0	0	1	0	0	0	0	0	0	0	0	0	0	0	Bacteria; Bacteroidetes; Sphingobacteriia; Sphingobacteriales; WCHB1-69; uncultured Bacteroidetes bacterium
1006	0	0	0	0	0	0	0	0	0	0	0	0	0	0	0	0	0	0	0	0	1	0	0	0	0	0	Bacteria; Bacteroidetes; vadinHA17; uncultured bacterium
1007	0	0	0	0	0	0	0	0	0	0	0	0	0	0	0	0	0	0	1	0	0	0	0	0	0	0	Bacteria; Bacteroidetes; VC2.1 Bac22; uncultured bacterium
1008	0	0	0	0	0	0	0	0	0	0	0	0	0	0	7	0	0	0	0	0	0	0	0	0	0	0	Bacteria; Bacteroidetes; VC2.1 Bac22; uncultured Bacteroidetes bacterium
1009	0	0	0	0	0	0	0	0	0	0	0	0	0	0	0	0	0	0	0	1	1	0	0	0	0	0	Bacteria; Bacteroidetes; VC2.1 Bac22; uncultured Bacteroidetes bacterium
1010	0	0	0	0	0	0	0	2	0	0	0	0	0	0	0	0	0	0	0	0	0	0	0	0	0	0	Bacteria; BD1-5; uncultured bacterium
1011	0	0	0	0	0	1	0	0	0	0	0	0	0	0	0	0	0	0	0	0	0	0	0	0	0	0	Bacteria; BD1-5; uncultured bacterium
1012	0	0	0	0	0	0	0	0	0	0	0	0	0	0	0	0	0	0	0	1	0	0	0	0	0	0	Bacteria; BHI80-139; uncultured organism
1013	0	0	3	0	0	0	0	0	0	0	0	0	0	0	0	0	0	0	0	0	0	0	0	0	0	0	Bacteria; Candidate division OD1; uncultured bacterium
1014	0	0	0	0	0	0	0	1	0	0	0	0	0	0	0	0	0	0	0	0	0	0	0	0	0	0	Bacteria; Candidate division OD1; uncultured bacterium
1015	0	0	0	0	0	0	0	0	0	0	0	0	0	0	1	0	0	0	0	0	0	0	0	0	0	0	Bacteria; Candidate division WS3; uncultured bacterium
1016	0	0	0	0	0	0	0	0	0	1	0	0	0	0	0	0	0	0	0	0	0	0	0	0	0	0	Bacteria; Chloroflexi; S085; uncultured bacterium
1017	0	0	0	0	0	2	0	0	0	0	0	0	0	0	0	0	0	0	0	0	0	0	0	0	0	0	Bacteria; Chloroflexi; SAR202 clade; SAR202 cluster bacterium SCGC AAA240-N13
1018	0	0	0	0	0	0	0	0	0	1	0	0	0	0	0	0	0	0	0	0	0	0	0	0	0	0	Bacteria; Chloroflexi; SAR202 clade; uncultured bacterium
1019	0	0	0	0	0	0	0	0	0	0	0	0	2	0	0	0	0	0	0	0	0	0	0	0	0	0	Bacteria; Chloroflexi; SAR202 clade; uncultured bacterium
1020	0	0	0	0	0	0	0	0	0	0	0	0	0	0	0	0	0	0	0	0	0	0	0	1	0	1	Bacteria; Chloroflexi; SAR202 clade; uncultured Bacteroidetes/Chlorobi group bacterium
1021	0	0	0	0	0	0	0	0	0	1	0	0	0	0	0	0	0	0	0	0	0	0	1	0	0	0	Bacteria; Chloroflexi; SAR202 clade; uncultured Chloroflexi bacterium
1022	0	0	0	0	0	2	0	0	0	0	0	0	0	0	0	0	0	0	0	0	0	0	0	0	0	0	Bacteria; Chloroflexi; SAR202 clade; uncultured Chloroflexi bacterium
1023	0	0	0	0	0	0	0	0	3	0	4	0	0	0	0	0	0	0	0	0	0	0	0	6	0	0	Bacteria; Chloroflexi; SAR202 clade; uncultured Chloroflexi bacterium
1024	0	0	0	0	0	1	0	0	0	0	0	0	0	0	0	0	0	0	0	0	0	0	0	0	0	0	Bacteria; Chloroflexi; SAR202 clade; uncultured deep-sea bacterium
1025	0	1	0	0	0	1	0	0	0	0	0	0	0	0	0	0	0	0	0	0	0	0	0	0	0	0	Bacteria; Chloroflexi; SAR202 clade; uncultured deep-sea bacterium
1026	0	0	0	0	0	1	0	0	0	0	0	0	0	0	0	0	0	0	0	0	0	0	0	0	0	0	Bacteria; Chloroflexi; SAR202 clade; uncultured deep-sea bacterium
1027	0	0	0	0	0	1	0	0	0	0	0	0	0	0	0	0	0	0	0	0	0	0	0	0	0	0	Bacteria; Chloroflexi; SAR202 clade; uncultured marine microorganism
1028	0	0	0	0	0	1	0	0	0	0	0	0	0	0	0	0	0	0	0	0	0	0	0	0	0	0	Bacteria; Chloroflexi; SAR202 clade; uncultured sediment bacterium
1029	0	0	0	0	0	0	0	0	0	0	0	0	0	0	0	0	0	0	0	0	0	0	0	0	0	1	Bacteria; Cyanobacteria; Cyanobacteria; SubsectionI; FamilyI; Gleocapsa; Gloeocapsa sp. PCC 73106
1030	0	0	0	0	0	0	0	0	0	0	0	0	0	0	0	0	0	0	1	0	0	0	0	0	2	0	Bacteria; Cyanobacteria; Cyanobacteria; SubsectionI; FamilyI; Gleocapsa; Gloeocapsa sp. PCC 73106
1031	0	0	0	0	0	0	0	0	0	0	0	0	0	0	0	0	0	1	0	0	0	0	0	0	0	0	Bacteria; Cyanobacteria; Cyanobacteria; SubsectionI; FamilyI; marine group; Candidatus Atelocyanobacterium thalassa isolate ALOHA
1032	0	0	0	0	4	0	0	1	0	0	0	0	0	0	0	0	0	0	0	1	0	0	0	0	0	0	Bacteria; Cyanobacteria; Cyanobacteria; SubsectionI; FamilyI; marine group; Candidatus Atelocyanobacterium thalassa isolate ALOHA
1033	0	0	0	0	0	0	0	0	0	0	0	0	0	0	0	0	0	5	0	0	0	0	0	0	0	0	Bacteria; Cyanobacteria; Cyanobacteria; SubsectionI; FamilyI; marine group; Candidatus Atelocyanobacterium thalassa isolate ALOHA
1034	0	0	0	0	0	0	0	0	0	0	0	0	0	0	0	0	0	0	0	0	0	0	2	0	0	0	Bacteria; Cyanobacteria; Cyanobacteria; SubsectionI; FamilyI; Prochlorococcus; uncultured bacterium
1035	0	0	0	0	0	0	0	0	0	0	0	0	0	0	0	0	0	1	0	0	0	0	0	0	0	0	Bacteria; Cyanobacteria; Cyanobacteria; SubsectionI; FamilyI; Prochlorococcus; uncultured bacterium
1036	0	0	0	0	0	0	0	0	0	0	0	0	0	0	0	0	0	0	0	0	0	0	1	0	0	0	Bacteria; Cyanobacteria; Cyanobacteria; SubsectionI; FamilyI; Prochlorococcus; uncultured bacterium
1037	0	0	0	0	0	0	0	0	0	0	0	0	0	0	0	0	0	0	0	0	0	0	0	0	0	1	Bacteria; Cyanobacteria; Cyanobacteria; SubsectionI; FamilyI; Prochlorococcus; uncultured bacterium
1038	0	0	0	0	0	0	0	0	0	0	0	0	0	0	0	0	0	14	0	0	0	0	0	0	0	0	Bacteria; Cyanobacteria; Cyanobacteria; SubsectionI; FamilyI; Prochlorococcus; uncultured bacterium
1039	0	0	0	0	0	0	0	0	0	0	0	0	0	0	0	0	0	0	0	0	0	1	0	0	0	0	Bacteria; Cyanobacteria; Cyanobacteria; SubsectionI; FamilyI; Prochlorococcus; uncultured bacterium
1040	0	0	0	0	0	0	0	0	0	0	0	0	1	0	0	0	0	0	0	0	0	0	0	0	0	0	Bacteria; Cyanobacteria; Cyanobacteria; SubsectionI; FamilyI; Prochlorococcus; uncultured bacterium
1041	0	0	0	0	0	0	0	0	0	0	0	0	0	0	0	0	0	0	0	0	0	0	0	0	1	0	Bacteria; Cyanobacteria; Cyanobacteria; SubsectionI; FamilyI; Prochlorococcus; uncultured bacterium
1042	0	0	0	0	0	0	0	0	0	0	1	0	0	0	0	0	0	0	0	0	0	0	0	1	0	0	Bacteria; Cyanobacteria; Cyanobacteria; SubsectionI; FamilyI; Prochlorococcus; uncultured bacterium
1043	0	0	0	0	0	0	0	0	0	0	0	0	0	0	0	0	0	0	1	0	0	0	0	0	0	0	Bacteria; Cyanobacteria; Cyanobacteria; SubsectionI; FamilyI; Prochlorococcus; uncultured bacterium
1044	0	0	0	0	0	0	0	0	0	0	0	0	0	0	0	0	0	0	0	0	0	0	0	0	1	0	Bacteria; Cyanobacteria; Cyanobacteria; SubsectionI; FamilyI; Prochlorococcus; uncultured bacterium
1045	0	0	0	0	0	0	0	0	0	0	0	0	0	0	0	0	0	7	0	0	0	0	0	0	0	0	Bacteria; Cyanobacteria; Cyanobacteria; SubsectionI; FamilyI; Prochlorococcus; uncultured bacterium
1046	0	0	0	0	0	0	0	0	0	0	0	0	0	0	0	0	0	0	0	0	0	0	0	0	1	0	Bacteria; Cyanobacteria; Cyanobacteria; SubsectionI; FamilyI; Prochlorococcus; uncultured bacterium
1047	0	0	0	0	0	0	0	0	0	0	0	0	0	0	0	0	0	0	0	0	0	0	0	1	0	0	Bacteria; Cyanobacteria; Cyanobacteria; SubsectionI; FamilyI; Prochlorococcus; uncultured bacterium
1048	0	0	0	0	0	0	0	0	0	0	0	0	0	0	0	0	0	0	0	0	0	0	0	0	0	1	Bacteria; Cyanobacteria; Cyanobacteria; SubsectionI; FamilyI; Prochlorococcus; uncultured bacterium
1049	0	0	0	0	0	0	0	0	0	0	0	0	0	0	0	0	0	0	0	0	0	0	0	0	0	1	Bacteria; Cyanobacteria; Cyanobacteria; SubsectionI; FamilyI; Prochlorococcus; uncultured bacterium
1050	0	0	0	0	0	0	0	0	0	0	0	0	0	0	0	0	0	0	0	0	0	0	0	0	0	1	Bacteria; Cyanobacteria; Cyanobacteria; SubsectionI; FamilyI; Prochlorococcus; uncultured bacterium
1051	0	0	0	0	0	0	0	0	0	0	0	0	0	0	0	0	0	0	0	0	0	0	0	0	1	0	Bacteria; Cyanobacteria; Cyanobacteria; SubsectionI; FamilyI; Prochlorococcus; uncultured bacterium
1052	0	0	0	0	0	0	0	0	0	0	0	0	0	0	0	0	0	0	1	0	0	0	0	0	0	0	Bacteria; Cyanobacteria; Cyanobacteria; SubsectionI; FamilyI; Prochlorococcus; uncultured bacterium
1053	0	0	0	0	0	0	0	0	0	0	0	0	0	0	0	0	0	7	0	0	0	0	0	0	0	0	Bacteria; Cyanobacteria; Cyanobacteria; SubsectionI; FamilyI; Prochlorococcus; uncultured bacterium
1054	0	0	0	0	0	0	0	0	0	0	0	0	0	0	0	0	0	0	0	0	0	0	0	0	1	0	Bacteria; Cyanobacteria; Cyanobacteria; SubsectionI; FamilyI; Prochlorococcus; uncultured bacterium
1055	0	0	0	0	0	0	0	0	0	0	0	0	0	0	0	0	0	1	0	0	0	0	0	0	0	0	Bacteria; Cyanobacteria; Cyanobacteria; SubsectionI; FamilyI; Prochlorococcus; uncultured bacterium
1056	0	0	0	0	0	0	0	0	0	0	0	0	0	0	0	0	0	0	0	0	0	0	2	0	0	0	Bacteria; Cyanobacteria; Cyanobacteria; SubsectionI; FamilyI; Prochlorococcus; uncultured bacterium
1057	0	0	0	0	0	0	0	0	0	0	0	0	0	0	0	0	0	0	0	0	0	3	0	0	0	0	Bacteria; Cyanobacteria; Cyanobacteria; SubsectionI; FamilyI; Prochlorococcus; uncultured bacterium
1058	0	0	0	0	0	0	0	0	0	0	0	0	0	0	0	0	0	1	0	0	0	0	0	0	0	0	Bacteria; Cyanobacteria; Cyanobacteria; SubsectionI; FamilyI; Prochlorococcus; uncultured bacterium
1059	0	0	0	0	0	0	0	0	0	0	0	0	0	0	0	0	0	0	0	0	0	1	0	0	0	0	Bacteria; Cyanobacteria; Cyanobacteria; SubsectionI; FamilyI; Prochlorococcus; uncultured bacterium
1060	0	0	0	0	0	0	0	0	0	0	0	0	0	0	0	0	0	0	1	0	0	0	0	0	0	0	Bacteria; Cyanobacteria; Cyanobacteria; SubsectionI; FamilyI; Prochlorococcus; uncultured bacterium
1061	0	0	0	0	0	0	0	0	0	0	0	0	0	0	0	0	0	1	0	0	0	0	0	0	0	0	Bacteria; Cyanobacteria; Cyanobacteria; SubsectionI; FamilyI; Synechococcus; Cyanobium sp. JJ12A2
1062	0	0	0	0	0	0	0	0	0	0	0	0	0	0	0	0	0	1	0	0	0	0	0	0	0	0	Bacteria; Cyanobacteria; Cyanobacteria; SubsectionI; FamilyI; Synechococcus; uncultured bacterium
1063	0	0	0	0	0	0	0	0	0	0	0	0	0	0	0	0	0	0	1	0	0	0	0	0	0	0	Bacteria; Cyanobacteria; Cyanobacteria; SubsectionI; FamilyI; Synechococcus; uncultured bacterium
1064	0	0	0	0	0	0	0	0	0	0	0	0	0	0	0	0	0	0	0	0	0	2	0	0	0	0	Bacteria; Cyanobacteria; Cyanobacteria; SubsectionI; FamilyI; Synechococcus; uncultured bacterium
1065	7	1	4	0	0	89	0	0	20	29	632	0	0	8	2	0	0	0	24	77	0	0	0	0	0	0	Bacteria; Cyanobacteria; Cyanobacteria; SubsectionI; FamilyI; Synechococcus; uncultured bacterium
1066	0	0	0	0	0	0	0	0	0	0	0	0	0	0	0	0	0	12	0	0	0	0	0	0	0	0	Bacteria; Cyanobacteria; Cyanobacteria; SubsectionI; FamilyI; Synechococcus; uncultured bacterium
1067	0	0	0	0	0	0	3	0	0	0	0	0	0	0	1	0	0	8	0	0	0	0	0	0	0	0	Bacteria; Cyanobacteria; Cyanobacteria; SubsectionI; FamilyI; Synechococcus; uncultured bacterium
1068	0	0	0	0	0	0	0	0	0	0	0	0	0	0	0	0	0	0	0	0	0	0	0	0	1	0	Bacteria; Cyanobacteria; Cyanobacteria; SubsectionI; FamilyI; Synechococcus; uncultured bacterium
1069	0	0	0	0	0	0	0	0	0	0	0	0	0	0	0	0	0	0	0	0	0	0	0	0	1	0	Bacteria; Cyanobacteria; Cyanobacteria; SubsectionI; FamilyI; Synechococcus; uncultured bacterium
1070	5	0	0	226	82	63	0	0	383	0	0	0	238	0	0	0	0	35	0	0	0	0	0	0	0	0	Bacteria; Cyanobacteria; Cyanobacteria; SubsectionI; FamilyI; Synechococcus; uncultured bacterium
1071	0	0	0	0	0	0	0	0	0	0	0	0	0	0	0	0	0	0	0	0	0	1	0	0	0	0	Bacteria; Cyanobacteria; Cyanobacteria; SubsectionI; FamilyI; Synechococcus; uncultured bacterium
1072	0	0	0	0	0	0	0	0	0	0	0	0	0	0	0	0	0	1	0	0	0	0	0	0	0	0	Bacteria; Cyanobacteria; Cyanobacteria; SubsectionI; FamilyI; Synechococcus; uncultured bacterium
1073	0	0	0	0	0	0	0	0	0	0	0	0	0	0	0	0	0	3	0	0	0	0	0	0	0	0	Bacteria; Cyanobacteria; Cyanobacteria; SubsectionI; FamilyI; Synechococcus; uncultured bacterium
1074	0	0	0	0	0	0	0	0	0	0	0	0	0	0	0	0	0	0	0	0	21	0	0	0	0	0	Bacteria; Cyanobacteria; Cyanobacteria; SubsectionI; FamilyI; Synechococcus; uncultured bacterium
1075	0	0	0	0	0	0	0	0	0	0	0	0	0	0	0	0	0	0	0	1	0	0	0	0	0	0	Bacteria; Cyanobacteria; Cyanobacteria; SubsectionI; FamilyI; Synechococcus; uncultured bacterium
1076	1	0	0	92	0	0	0	0	0	175	0	0	96	12	23	5	34	2	12	51	20	332	87	7	185	60	Bacteria; Cyanobacteria; Cyanobacteria; SubsectionI; FamilyI; Synechococcus; uncultured bacterium
1077	0	0	0	0	0	0	0	0	0	0	0	0	0	0	0	0	0	2	0	0	0	0	0	0	0	0	Bacteria; Cyanobacteria; Cyanobacteria; SubsectionI; FamilyI; Synechococcus; uncultured bacterium
1078	0	0	0	275	0	0	0	0	524	625	0	0	373	0	0	0	0	0	0	0	0	0	1	0	0	0	Bacteria; Cyanobacteria; Cyanobacteria; SubsectionI; FamilyI; Synechococcus; uncultured bacterium
1079	0	0	0	0	0	0	0	0	0	0	0	0	0	0	0	0	0	0	0	1	0	0	0	0	0	0	Bacteria; Cyanobacteria; Cyanobacteria; SubsectionI; FamilyI; Synechococcus; uncultured bacterium
1080	1	0	0	0	0	0	0	0	0	2	0	0	1	0	0	0	0	0	0	0	0	0	0	0	0	0	Bacteria; Cyanobacteria; Cyanobacteria; SubsectionI; FamilyI; Synechococcus; uncultured bacterium
1081	0	0	0	0	0	0	0	0	0	0	0	0	0	0	1	0	0	0	0	0	0	0	0	0	0	0	Bacteria; Cyanobacteria; Cyanobacteria; SubsectionI; FamilyI; Synechococcus; uncultured bacterium
1082	0	0	0	0	0	0	0	0	0	0	0	0	6	0	0	0	0	0	0	0	0	1	0	0	12	0	Bacteria; Cyanobacteria; Cyanobacteria; SubsectionI; FamilyI; Synechococcus; uncultured bacterium
1083	0	2	0	0	0	0	0	0	0	2	0	1567	0	4	0	0	0	1727	32	87	139	59	2	459	776	1	Bacteria; Cyanobacteria; Cyanobacteria; SubsectionI; FamilyI; Synechococcus; uncultured bacterium
1084	0	0	0	0	0	0	0	0	0	0	0	0	0	0	0	0	0	10	0	0	0	0	0	0	0	0	Bacteria; Cyanobacteria; Cyanobacteria; SubsectionI; FamilyI; Synechococcus; uncultured bacterium
1085	0	0	0	0	0	0	0	0	0	0	0	0	0	0	0	0	0	0	0	0	0	0	1	0	0	0	Bacteria; Cyanobacteria; Cyanobacteria; SubsectionI; FamilyI; Synechococcus; uncultured bacterium
1086	0	0	0	0	0	0	0	0	0	0	0	0	0	0	0	0	0	0	0	0	0	0	0	0	1	0	Bacteria; Cyanobacteria; Cyanobacteria; SubsectionI; FamilyI; Synechococcus; uncultured bacterium
1087	0	0	0	0	0	0	0	0	0	0	0	0	0	0	0	0	0	0	0	0	0	0	0	0	0	1	Bacteria; Cyanobacteria; Cyanobacteria; SubsectionI; FamilyI; Synechococcus; uncultured bacterium
1088	0	0	0	0	0	0	0	0	0	0	0	0	0	0	0	0	0	0	0	0	0	24	0	0	0	0	Bacteria; Cyanobacteria; Cyanobacteria; SubsectionI; FamilyI; Synechococcus; uncultured bacterium
1089	0	0	0	0	0	0	0	0	0	0	0	0	0	0	0	0	0	0	0	0	0	0	0	1	0	0	Bacteria; Cyanobacteria; Cyanobacteria; SubsectionI; FamilyI; Synechococcus; uncultured bacterium
1090	0	0	0	0	0	0	0	0	0	0	0	0	0	0	0	0	0	0	0	0	0	0	1	0	0	0	Bacteria; Cyanobacteria; Cyanobacteria; SubsectionI; FamilyI; Synechococcus; uncultured bacterium
1091	0	2	9	120	2803	31	107	103	189	441	1068	1108	0	23	1	51	6	530	237	602	0	1014	601	1049	2066	482	Bacteria; Cyanobacteria; Cyanobacteria; SubsectionI; FamilyI; Synechococcus; uncultured bacterium
1092	0	0	0	0	0	0	0	0	0	0	0	0	0	0	0	0	0	0	0	0	0	0	1	0	0	0	Bacteria; Cyanobacteria; Cyanobacteria; SubsectionI; FamilyI; Synechococcus; uncultured bacterium
1093	0	0	0	0	0	0	0	0	0	0	5	0	0	0	0	0	0	0	0	0	0	0	0	0	0	0	Bacteria; Cyanobacteria; Cyanobacteria; SubsectionI; FamilyI; Synechococcus; uncultured bacterium
1094	0	0	0	38	0	0	0	0	55	0	42	45	0	0	0	0	1	0	0	0	0	0	22	16	7	60	Bacteria; Cyanobacteria; Cyanobacteria; SubsectionI; FamilyI; Synechococcus; uncultured bacterium
1095	0	0	0	0	0	0	0	0	0	0	0	0	0	0	9	0	0	44	9	0	0	0	0	0	24	0	Bacteria; Cyanobacteria; Cyanobacteria; SubsectionI; FamilyI; Synechococcus; uncultured bacterium
1096	0	0	0	0	0	0	0	0	0	0	0	0	0	0	0	0	0	0	0	0	0	0	0	0	1	0	Bacteria; Cyanobacteria; Cyanobacteria; SubsectionI; FamilyI; Synechococcus; uncultured bacterium
1097	0	0	0	0	0	0	0	0	0	0	0	0	0	0	0	0	0	0	0	0	5	0	0	0	0	0	Bacteria; Cyanobacteria; Cyanobacteria; SubsectionI; FamilyI; Synechococcus; uncultured bacterium
1098	7	2	0	0	0	49	0	0	206	23	0	0	1	1	0	27	1	8	0	12	0	0	0	0	0	4	Bacteria; Cyanobacteria; Cyanobacteria; SubsectionI; FamilyI; Synechococcus; uncultured bacterium
1099	0	0	0	0	0	0	0	0	0	0	0	0	0	0	0	0	0	0	1	0	0	0	0	0	0	0	Bacteria; Cyanobacteria; Cyanobacteria; SubsectionI; FamilyI; Synechococcus; uncultured bacterium
1100	0	0	0	0	0	0	0	0	0	0	0	0	0	0	0	0	0	0	1	0	0	0	0	0	0	1	Bacteria; Cyanobacteria; Cyanobacteria; SubsectionI; FamilyI; Synechococcus; uncultured bacterium
1101	0	0	0	0	0	0	0	0	0	0	0	0	0	0	0	0	0	0	0	0	0	0	0	0	0	1	Bacteria; Cyanobacteria; Cyanobacteria; SubsectionI; FamilyI; Synechococcus; uncultured bacterium
1102	0	0	0	0	0	0	0	0	0	0	0	0	0	0	1	0	0	0	0	0	0	0	0	0	0	0	Bacteria; Cyanobacteria; Cyanobacteria; SubsectionI; FamilyI; Synechococcus; uncultured bacterium
1103	0	0	0	0	0	0	0	0	0	0	0	0	0	0	0	0	0	0	0	0	0	0	1	0	0	0	Bacteria; Cyanobacteria; Cyanobacteria; SubsectionI; FamilyI; Synechococcus; uncultured bacterium
1104	0	0	0	0	0	0	0	0	0	0	0	0	0	0	1	0	0	0	0	0	0	0	0	0	0	0	Bacteria; Cyanobacteria; Cyanobacteria; SubsectionI; FamilyI; Synechococcus; uncultured bacterium
1105	0	0	0	0	0	0	0	0	0	0	0	0	0	1	0	0	0	0	0	0	0	0	0	0	0	0	Bacteria; Cyanobacteria; Cyanobacteria; SubsectionI; FamilyI; Synechococcus; uncultured bacterium
1106	0	0	0	0	0	0	0	0	0	0	0	0	0	0	0	0	0	1	0	0	0	0	0	0	0	0	Bacteria; Cyanobacteria; Cyanobacteria; SubsectionI; FamilyI; Synechococcus; uncultured bacterium
1107	0	0	0	0	0	0	0	0	0	0	0	0	0	0	0	0	0	0	0	0	0	0	0	0	0	18	Bacteria; Cyanobacteria; Cyanobacteria; SubsectionI; FamilyI; Synechococcus; uncultured bacterium
1108	0	0	0	0	0	0	0	0	0	0	0	0	0	0	0	0	0	0	0	0	0	0	1	0	0	0	Bacteria; Cyanobacteria; Cyanobacteria; SubsectionI; FamilyI; Synechococcus; uncultured cyanobacterium
1109	0	0	0	0	0	0	0	0	0	0	0	0	0	0	0	0	0	12	0	0	0	0	0	0	0	0	Bacteria; Cyanobacteria; Cyanobacteria; SubsectionI; FamilyI; Synechococcus; uncultured cyanobacterium
1110	0	0	0	0	0	0	0	0	0	0	0	0	0	0	0	0	0	0	0	0	0	0	1	0	0	0	Bacteria; Cyanobacteria; Cyanobacteria; SubsectionI; FamilyI; Synechococcus; uncultured cyanobacterium
1111	0	0	0	0	0	0	0	0	0	0	0	0	0	0	0	0	0	1	0	0	0	0	0	0	0	0	Bacteria; Cyanobacteria; Cyanobacteria; SubsectionI; FamilyI; Synechococcus; uncultured cyanobacterium
1112	0	0	0	0	0	0	0	0	0	0	0	0	0	0	0	0	1	94	4	0	0	0	3	0	0	0	Bacteria; Cyanobacteria; Cyanobacteria; SubsectionI; FamilyI; Synechococcus; uncultured cyanobacterium
1113	0	0	0	0	0	0	0	0	0	0	0	0	0	0	5	0	0	0	0	0	0	0	0	0	0	0	Bacteria; Cyanobacteria; Cyanobacteria; SubsectionI; FamilyI; Synechococcus; uncultured marine bacterium
1114	0	0	0	0	0	0	0	0	0	0	0	0	0	0	0	0	0	1	0	0	0	0	0	0	0	0	Bacteria; Cyanobacteria; Cyanobacteria; SubsectionI; FamilyI; Synechococcus; unidentified marine bacterioplankton
1115	0	0	0	0	0	0	0	0	0	3	0	0	0	0	0	0	0	0	0	0	0	0	0	0	0	0	Bacteria; Cyanobacteria; Cyanobacteria; SubsectionI; FamilyI; Synechococcus; unidentified marine bacterioplankton
1116	0	0	0	0	0	0	0	0	0	0	0	0	0	0	0	0	0	1	0	0	0	0	0	0	0	0	Bacteria; Cyanobacteria; Cyanobacteria; SubsectionI; FamilyI; uncultured marine microorganism
1117	0	0	0	0	0	0	0	1	0	1	0	0	0	0	0	0	0	3	4	0	0	0	6	0	0	0	Bacteria; Cyanobacteria; Cyanobacteria; SubsectionIII; FamilyI; Chamaesiphon; uncultured bacterium
1118	0	0	0	0	0	0	0	0	0	0	0	0	0	0	0	0	0	0	1	2	0	0	0	0	0	0	Bacteria; Cyanobacteria; Cyanobacteria; SubsectionIII; FamilyI; Leptolyngbya; uncultured bacterium
1119	0	0	0	0	0	1	0	0	0	0	0	0	0	0	0	0	0	0	0	0	0	0	0	0	0	0	Bacteria; Cyanobacteria; Cyanobacteria; SubsectionIII; FamilyI; Leptolyngbya; uncultured bacterium
1120	0	0	0	0	0	0	0	0	0	0	0	0	0	0	0	0	0	0	0	0	0	0	1	0	0	0	Bacteria; Cyanobacteria; Cyanobacteria; SubsectionIII; FamilyI; Leptolyngbya; uncultured bacterium
1121	0	0	0	0	0	0	0	0	0	1	0	0	0	0	0	0	0	0	0	0	0	0	0	0	0	0	Bacteria; Cyanobacteria; Cyanobacteria; SubsectionIII; FamilyI; Leptolyngbya; uncultured bacterium
1122	0	0	0	0	0	0	0	0	0	0	0	0	0	0	0	0	0	0	0	0	0	0	2	0	0	0	Bacteria; Cyanobacteria; Cyanobacteria; SubsectionIV; FamilyI; Anabaena; Anabaena sp. BIR241
1123	0	0	1	0	0	1	0	0	0	0	0	0	0	0	1	0	0	0	0	0	0	0	0	0	0	0	Bacteria; Cyanobacteria; Cyanobacteria; SubsectionIV; FamilyII; Calothrix; uncultured bacterium
1124	0	0	0	0	0	0	0	0	0	0	0	0	0	0	0	0	0	0	0	1	0	0	0	0	0	0	Bacteria; Cyanobacteria; Cyanobacteria; SubsectionIV; FamilyII; Rivularia; Calothrix sp. UAM 374
1125	0	0	0	0	0	0	0	0	0	0	0	0	0	1	0	0	0	0	0	0	0	0	0	0	0	0	Bacteria; Cyanobacteria; Cyanobacteria; uncultured; Toxopsis calypsus PLF
1126	0	0	1	0	0	0	0	1	0	0	0	0	0	0	1	0	1	0	0	0	1	0	0	0	0	0	Bacteria; Cyanobacteria; ML635J-21; uncultured bacterium
1127	0	0	0	0	0	0	0	0	0	0	0	0	0	0	0	0	0	0	0	1	0	0	0	0	0	0	Bacteria; Cyanobacteria; ML635J-21; uncultured bacterium
1128	0	0	0	0	0	0	0	0	0	0	0	0	0	0	0	1	0	0	0	0	1	0	0	0	0	0	Bacteria; Cyanobacteria; ML635J-21; uncultured bacterium
1129	0	0	0	0	0	0	0	0	0	0	0	0	0	0	0	0	0	0	0	1	0	0	0	0	0	0	Bacteria; Cyanobacteria; ML635J-21; uncultured bacterium
1130	0	0	0	2	0	0	0	0	0	0	0	0	1	0	0	0	0	0	0	0	0	0	0	1	0	4	Bacteria; Cyanobacteria; ML635J-21; uncultured bacterium
1131	0	0	0	0	0	0	0	0	0	0	0	0	0	0	0	0	0	0	0	0	1	0	0	0	0	0	Bacteria; Cyanobacteria; ML635J-21; uncultured bacterium
1132	0	10	2	0	0	0	0	0	0	0	0	0	0	6	2	3	0	0	3	1	3	0	0	0	0	0	Bacteria; Cyanobacteria; ML635J-21; uncultured bacterium
1133	1	0	0	0	0	0	0	0	0	0	0	0	0	0	0	0	0	0	0	0	1	0	0	0	0	0	Bacteria; Cyanobacteria; ML635J-21; uncultured bacterium
1134	0	0	0	0	0	0	0	0	1	1	0	0	0	0	0	0	0	0	1	0	0	1	0	0	1	1	Bacteria; Cyanobacteria; ML635J-21; uncultured bacterium
1135	0	0	0	1	0	0	0	0	0	0	0	0	0	0	0	0	0	0	0	0	0	0	0	0	0	0	Bacteria; Cyanobacteria; ML635J-21; uncultured bacterium
1136	0	0	0	0	0	0	0	0	0	0	0	0	0	0	0	0	0	0	1	0	0	0	0	0	0	0	Bacteria; Cyanobacteria; ML635J-21; uncultured bacterium
1137	0	0	0	0	0	0	0	0	0	0	0	0	0	0	0	0	0	0	0	0	2	0	0	0	0	0	Bacteria; Cyanobacteria; ML635J-21; uncultured bacterium
1138	0	0	0	12	0	0	0	0	0	0	0	3	10	0	0	0	0	0	0	0	0	1	0	1	0	29	Bacteria; Cyanobacteria; ML635J-21; uncultured marine bacterium
1139	0	0	0	0	0	0	0	0	0	1	0	0	0	0	0	0	0	0	0	0	0	0	0	0	0	0	Bacteria; Cyanobacteria; ML635J-21; uncultured Marinimicrobia bacterium
1140	0	0	0	0	0	0	0	0	0	0	0	0	0	1	0	0	0	0	0	0	0	0	0	0	0	0	Bacteria; Cyanobacteria; ML635J-21; uncultured organism
1141	1	0	0	0	0	0	0	0	0	0	0	0	0	0	0	0	0	0	0	0	0	0	0	0	0	0	Bacteria; Cyanobacteria; ML635J-21; uncultured organism
1142	1	0	0	0	0	0	0	0	0	0	0	0	0	0	0	0	0	0	0	0	0	0	0	0	0	0	Bacteria; Cyanobacteria; ML635J-21; uncultured organism
1143	0	0	0	0	0	0	0	0	0	0	1	0	0	0	0	0	0	0	0	0	0	0	0	0	0	0	Bacteria; Deferribacteres; Deferribacteres; Deferribacterales; PAUC34f; uncultured bacterium
1144	0	0	0	0	0	0	0	0	0	0	0	0	0	0	0	0	0	0	0	0	0	0	2	1	0	0	Bacteria; Deferribacteres; Deferribacteres; Deferribacterales; PAUC34f; uncultured bacterium
1145	0	0	0	0	0	0	0	0	0	1	0	0	0	0	0	0	0	0	0	0	0	0	0	0	0	0	Bacteria; Deferribacteres; Deferribacteres; Deferribacterales; PAUC34f; uncultured bacterium
1146	0	0	0	1	0	0	0	0	0	0	0	0	0	0	0	0	0	0	0	0	0	0	0	0	0	1	Bacteria; Deferribacteres; Deferribacteres; Deferribacterales; SAR406 clade(Marine group A); marine metagenome
1147	0	0	0	1	0	0	0	0	0	0	0	0	1	0	0	0	0	0	0	0	0	0	0	0	0	0	Bacteria; Deferribacteres; Deferribacteres; Deferribacterales; SAR406 clade(Marine group A); marine metagenome
1148	0	0	0	0	0	0	0	0	0	0	0	0	0	0	0	0	0	1	0	0	0	0	0	0	0	0	Bacteria; Deferribacteres; Deferribacteres; Deferribacterales; SAR406 clade(Marine group A); Marinimicrobia bacterium JGI OTU-2
1149	0	0	0	139	0	2	3	0	10	5	9	15	231	0	0	0	0	2	0	0	0	3	0	1	0	1	Bacteria; Deferribacteres; Deferribacteres; Deferribacterales; SAR406 clade(Marine group A); Marinimicrobia bacterium JGI OTU-2
1150	0	0	1	46	4	0	0	0	3	0	17	4	23	0	0	0	0	1	1	0	0	0	0	3	0	44	Bacteria; Deferribacteres; Deferribacteres; Deferribacterales; SAR406 clade(Marine group A); Marinimicrobia bacterium JGI OTU-2
1151	0	0	0	0	0	0	0	0	0	1	0	0	0	0	0	0	0	0	0	1	0	0	1	0	0	1	Bacteria; Deferribacteres; Deferribacteres; Deferribacterales; SAR406 clade(Marine group A); Marinimicrobia bacterium JGI OTU-2
1152	0	0	0	0	0	0	0	0	0	1	0	0	0	0	0	0	0	0	0	0	0	0	0	0	0	0	Bacteria; Deferribacteres; Deferribacteres; Deferribacterales; SAR406 clade(Marine group A); uncultured bacterium
1153	0	0	0	6	0	0	0	0	0	2	3	0	3	0	0	0	0	0	1	1	0	0	0	1	1	5	Bacteria; Deferribacteres; Deferribacteres; Deferribacterales; SAR406 clade(Marine group A); uncultured bacterium
1154	0	0	0	0	0	0	0	0	1	0	0	0	2	0	0	0	0	0	0	0	0	0	0	0	0	0	Bacteria; Deferribacteres; Deferribacteres; Deferribacterales; SAR406 clade(Marine group A); uncultured bacterium
1155	0	0	0	0	0	0	0	0	0	0	0	0	0	0	0	0	0	0	0	0	0	0	0	0	0	1	Bacteria; Deferribacteres; Deferribacteres; Deferribacterales; SAR406 clade(Marine group A); uncultured bacterium
1156	0	0	0	0	0	0	0	0	0	0	0	0	0	0	0	0	0	0	0	0	0	0	0	0	0	1	Bacteria; Deferribacteres; Deferribacteres; Deferribacterales; SAR406 clade(Marine group A); uncultured bacterium
1157	0	0	0	3	0	0	0	0	1	0	0	0	1	0	0	0	0	0	0	0	0	0	0	0	0	0	Bacteria; Deferribacteres; Deferribacteres; Deferribacterales; SAR406 clade(Marine group A); uncultured bacterium
1158	0	0	0	0	0	0	0	0	0	0	0	0	0	0	0	0	0	0	0	0	0	0	1	0	0	0	Bacteria; Deferribacteres; Deferribacteres; Deferribacterales; SAR406 clade(Marine group A); uncultured bacterium
1159	0	0	0	0	0	0	0	0	1	0	0	0	0	0	0	0	0	0	0	0	0	0	0	0	0	0	Bacteria; Deferribacteres; Deferribacteres; Deferribacterales; SAR406 clade(Marine group A); uncultured bacterium
1160	0	0	0	1	0	0	0	0	0	1	0	0	0	0	0	0	0	0	0	0	0	0	0	0	0	2	Bacteria; Deferribacteres; Deferribacteres; Deferribacterales; SAR406 clade(Marine group A); uncultured bacterium
1161	0	0	0	0	0	0	0	0	0	0	0	0	0	0	0	0	0	0	0	0	0	0	0	0	0	1	Bacteria; Deferribacteres; Deferribacteres; Deferribacterales; SAR406 clade(Marine group A); uncultured bacterium
1162	0	0	0	0	0	0	0	0	0	0	0	0	0	0	0	0	0	1	0	0	0	0	0	0	0	0	Bacteria; Deferribacteres; Deferribacteres; Deferribacterales; SAR406 clade(Marine group A); uncultured bacterium MB13C05
1163	0	0	0	0	0	0	0	0	0	0	0	0	0	0	0	0	0	0	0	0	0	0	0	0	0	1	Bacteria; Deferribacteres; Deferribacteres; Deferribacterales; SAR406 clade(Marine group A); uncultured bacterium MB13C05
1164	2	1	0	65	1	7	0	0	2	0	11	8	68	1	0	0	0	0	27	3	2	0	0	0	2	40	Bacteria; Deferribacteres; Deferribacteres; Deferribacterales; SAR406 clade(Marine group A); uncultured bacterium MB13C05
1165	0	0	0	0	0	0	0	0	0	0	0	0	0	0	0	0	0	0	0	0	1	0	0	0	0	0	Bacteria; Deferribacteres; Deferribacteres; Deferribacterales; SAR406 clade(Marine group A); uncultured marine bacterium
1166	0	0	0	0	0	0	0	0	0	0	0	0	0	0	0	0	0	0	0	0	0	0	0	0	1	0	Bacteria; Deferribacteres; Deferribacteres; Deferribacterales; SAR406 clade(Marine group A); uncultured marine bacterium
1167	1	0	0	0	1	3	0	2	0	0	2	1	1	1	0	0	0	0	4	1	0	0	0	3	4	0	Bacteria; Deferribacteres; Deferribacteres; Deferribacterales; SAR406 clade(Marine group A); uncultured marine bacterium
1168	0	1	0	5	0	2	0	0	1	0	3	3	0	1	0	0	0	1	0	0	0	0	0	5	1	0	Bacteria; Deferribacteres; Deferribacteres; Deferribacterales; SAR406 clade(Marine group A); uncultured marine bacterium
1169	0	0	0	0	0	0	0	0	0	0	0	0	0	0	0	0	0	0	0	0	0	0	0	0	0	1	Bacteria; Deferribacteres; Deferribacteres; Deferribacterales; SAR406 clade(Marine group A); uncultured marine bacterium
1170	0	0	0	0	2	2	4	0	2	0	2	0	0	0	0	0	0	0	0	1	0	0	0	0	6	0	Bacteria; Deferribacteres; Deferribacteres; Deferribacterales; SAR406 clade(Marine group A); uncultured marine bacterium
1171	0	0	0	0	1	0	0	0	0	0	0	0	0	1	0	0	0	0	0	1	0	0	0	0	1	1	Bacteria; Deferribacteres; Deferribacteres; Deferribacterales; SAR406 clade(Marine group A); uncultured marine bacterium
1172	0	0	0	0	0	0	0	0	0	0	0	0	0	0	0	0	0	0	0	2	0	0	0	0	0	0	Bacteria; Deferribacteres; Deferribacteres; Deferribacterales; SAR406 clade(Marine group A); uncultured marine bacterium
1173	0	0	0	0	0	0	0	0	0	0	0	0	1	0	0	0	0	0	0	0	0	0	0	0	0	0	Bacteria; Deferribacteres; Deferribacteres; Deferribacterales; SAR406 clade(Marine group A); uncultured marine bacterium
1174	0	0	0	0	0	0	0	0	0	0	0	0	2	0	0	0	0	0	0	0	0	0	0	0	0	1	Bacteria; Deferribacteres; Deferribacteres; Deferribacterales; SAR406 clade(Marine group A); uncultured Marinimicrobia bacterium
1175	0	0	0	0	0	0	0	0	0	0	0	0	0	0	0	0	0	0	0	0	0	0	1	0	0	0	Bacteria; Deferribacteres; Deferribacteres; Deferribacterales; SAR406 clade(Marine group A); uncultured Marinimicrobia bacterium
1176	0	0	0	0	0	0	0	0	0	0	0	0	0	0	0	0	0	0	0	0	0	0	1	0	0	0	Bacteria; Deferribacteres; Deferribacteres; Deferribacterales; SAR406 clade(Marine group A); uncultured Marinimicrobia bacterium
1177	0	0	0	0	0	0	0	0	0	0	0	0	0	1	0	0	0	0	0	0	0	0	0	0	0	0	Bacteria; Elusimicrobia; Elusimicrobia; Rs-M47; uncultured bacterium
1178	0	0	0	0	0	0	0	0	0	0	0	0	0	1	0	0	0	0	0	0	0	0	0	0	0	0	Bacteria; Fibrobacteres; Fibrobacteria; Fibrobacterales; Fibrobacteraceae; Fibrobacter; uncultured bacterium
1179	0	0	0	0	0	0	0	0	0	0	0	0	0	2	0	0	0	0	0	0	0	0	0	0	0	0	Bacteria; Fibrobacteres; Fibrobacteria; Fibrobacterales; Fibrobacteraceae; Fibrobacter; uncultured bacterium
1180	0	0	0	0	0	0	0	0	0	0	0	0	0	4	2	0	0	0	0	0	0	0	0	0	0	0	Bacteria; Fibrobacteres; Fibrobacteria; Fibrobacterales; Fibrobacteraceae; Fibrobacter; uncultured bacterium
1181	0	0	0	0	0	0	0	0	0	0	2	1	0	0	0	0	0	0	0	0	0	0	0	2	4	0	Bacteria; Fibrobacteres; Fibrobacteria; Fibrobacterales; Fibrobacteraceae; Fibrobacter; uncultured bacterium
1182	0	0	0	0	0	0	0	0	0	0	0	0	0	0	0	1	0	0	0	0	0	0	0	0	0	0	Bacteria; Fibrobacteres; Fibrobacteria; Fibrobacterales; Fibrobacteraceae; possible genus 06; uncultured bacterium
1183	0	0	0	0	1	0	0	0	0	1	0	5	0	0	0	0	0	0	0	0	0	0	0	0	0	0	Bacteria; Fibrobacteres; Fibrobacteria; Fibrobacterales; Fibrobacteraceae; uncultured; uncultured bacterium
1184	0	0	0	1	0	0	0	0	0	0	0	3	41	0	0	0	0	2	0	1	0	0	0	5	2	28	Bacteria; Fibrobacteres; Fibrobacteria; Fibrobacterales; Fibrobacteraceae; uncultured; uncultured bacterium
1185	0	0	0	0	0	0	0	1	0	0	0	0	0	0	0	0	0	0	0	0	0	0	0	0	0	0	Bacteria; Fibrobacteres; Fibrobacteria; Fibrobacterales; Fibrobacteraceae; uncultured; uncultured deep-sea bacterium
1186	0	0	0	0	0	0	0	0	0	0	0	0	0	0	0	0	0	0	0	0	1	0	0	0	0	0	Bacteria; Fibrobacteres; Fibrobacteria; Fibrobacterales; Fibrobacteraceae; uncultured; uncultured Fibrobacteres bacterium
1187	0	0	0	27	0	0	0	0	0	0	0	0	0	0	0	0	0	0	0	0	0	0	0	0	0	0	Bacteria; Fibrobacteres; Fibrobacteria; Fibrobacterales; Fibrobacteraceae; uncultured; uncultured microorganism
1188	0	0	0	0	0	0	0	0	0	0	0	0	0	0	1	0	0	0	0	0	0	0	0	0	0	0	Bacteria; Fibrobacteres; Fibrobacteria; Fibrobacteria Incertae Sedis; Unknown Family; possible genus 03; uncultured bacterium
1189	0	1	0	0	0	0	0	0	0	0	0	0	0	0	0	0	0	0	0	0	0	0	0	0	0	0	Bacteria; Fibrobacteres; Fibrobacteria; possible order 07; uncultured bacterium
1190	0	0	0	0	0	0	0	0	0	0	0	0	0	0	0	0	0	0	0	1	0	0	0	0	0	0	Bacteria; Firmicutes; Bacilli; Bacillales; Bacillaceae; Bacillus; uncultured bacterium
1191	0	0	0	0	0	0	0	0	2	0	0	1	0	0	0	0	0	0	0	0	0	0	0	0	0	0	Bacteria; Firmicutes; Bacilli; Bacillales; Bacillaceae; Geobacillus; Geobacillus sp. GHH01
1192	0	0	0	0	0	0	0	0	1	0	1	0	0	0	0	0	0	0	0	0	0	0	0	0	0	0	Bacteria; Firmicutes; Bacilli; Bacillales; Bacillaceae; Geobacillus; uncultured organism
1193	0	0	0	0	0	0	0	0	0	0	0	0	0	0	1	0	0	0	0	0	0	0	0	0	0	0	Bacteria; Firmicutes; Bacilli; Bacillales; Staphylococcaceae; Staphylococcus; Staphylococcus saprophyticus subsp. saprophyticus
1194	0	0	0	0	0	0	0	0	0	0	0	0	0	0	0	0	1	0	0	0	0	1	0	0	0	0	Bacteria; Firmicutes; Bacilli; Bacillales; Staphylococcaceae; Staphylococcus; uncultured bacterium
1195	0	0	0	0	2	0	0	0	0	1	0	0	0	0	0	0	0	0	0	0	0	0	0	0	0	0	Bacteria; Firmicutes; Bacilli; Bacillales; Staphylococcaceae; Staphylococcus; uncultured bacterium
1196	0	0	0	0	0	0	0	0	0	0	0	0	0	0	1	0	0	0	0	0	0	0	0	0	0	0	Bacteria; Firmicutes; Bacilli; Lactobacillales; Enterococcaceae; Enterococcus; uncultured bacterium
1197	0	0	0	0	0	0	0	0	0	0	0	0	0	0	3	0	0	0	0	0	0	0	0	0	0	0	Bacteria; Firmicutes; Bacilli; Lactobacillales; Enterococcaceae; Enterococcus; uncultured bacterium
1198	0	0	0	0	0	0	0	0	0	1	0	0	0	0	0	0	0	0	0	0	0	0	0	0	0	0	Bacteria; Firmicutes; Bacilli; Lactobacillales; Lactobacillaceae; Lactobacillus; uncultured bacterium
1199	0	0	0	0	0	0	0	0	0	0	0	0	0	0	1	0	0	0	0	0	0	0	0	0	0	0	Bacteria; Firmicutes; Bacilli; Lactobacillales; Lactobacillaceae; Lactobacillus; uncultured Lactobacillus sp.
1200	0	0	0	0	0	0	0	0	0	0	0	0	0	0	0	0	0	0	0	0	0	0	0	0	1	0	Bacteria; Firmicutes; Bacilli; Lactobacillales; Streptococcaceae; Streptococcus; uncultured bacterium
1201	0	0	0	0	0	0	0	0	0	0	0	0	0	0	0	0	0	0	0	0	0	0	1	0	0	0	Bacteria; Firmicutes; Bacilli; Lactobacillales; Streptococcaceae; Streptococcus; uncultured bacterium
1202	0	0	0	0	0	0	0	0	0	0	0	0	0	0	0	0	0	0	1	0	0	0	0	0	0	0	Bacteria; Firmicutes; Clostridia; Clostridiales; Clostridiaceae 1; Clostridium sensu stricto 1; uncultured bacterium
1203	0	2	0	0	0	0	0	0	0	0	0	0	0	0	0	0	0	0	0	0	0	0	0	0	0	0	Bacteria; Firmicutes; Clostridia; Clostridiales; Clostridiaceae 1; Clostridium sensu stricto 1; uncultured bacterium
1204	0	0	0	0	0	0	0	1	0	0	0	0	0	0	0	0	0	0	0	0	0	0	0	0	0	0	Bacteria; Firmicutes; Clostridia; Clostridiales; Family XII; Fusibacter; uncultured bacterium
1205	0	0	0	0	0	0	0	0	0	1	0	0	0	0	0	0	0	0	0	0	0	0	0	0	0	0	Bacteria; Firmicutes; Clostridia; Clostridiales; Lachnospiraceae; Oribacterium; uncultured bacterium
1206	0	0	0	0	0	0	0	0	0	0	0	0	0	0	2	0	0	0	0	0	0	0	0	0	0	0	Bacteria; Firmicutes; Clostridia; Clostridiales; Ruminococcaceae; Faecalibacterium; uncultured bacterium
1207	0	0	0	0	0	0	0	0	0	0	0	0	0	0	1	0	0	0	0	0	0	0	0	0	0	0	Bacteria; Fusobacteria; Fusobacteriia; Fusobacteriales; boneC3G7; uncultured bacterium
1208	0	0	0	0	0	0	0	0	0	0	0	0	0	0	1	0	0	0	0	0	0	0	0	0	0	0	Bacteria; Fusobacteria; Fusobacteriia; Fusobacteriales; Fusobacteriaceae; Fusobacterium; uncultured bacterium
1209	0	0	0	0	0	0	0	0	0	0	0	0	0	0	1	0	0	0	0	0	0	0	0	0	0	0	Bacteria; Fusobacteria; Fusobacteriia; Fusobacteriales; Fusobacteriaceae; Psychrilyobacter; uncultured Fusobacteria bacterium
1210	0	0	0	0	0	0	0	0	0	0	0	0	0	1	0	0	0	0	0	0	0	0	0	0	0	0	Bacteria; Gemmatimonadetes; Gemmatimonadetes; Gemmatimonadales; Gemmatimonadaceae; Gemmatimonas; uncultured bacterium
1211	0	0	0	0	0	0	1	0	0	0	0	0	0	0	0	0	0	0	0	0	0	0	0	0	0	0	Bacteria; Lentisphaerae; LD1-PB3; uncultured bacterium
1212	0	0	0	0	0	0	0	0	0	0	0	0	0	0	0	1	0	0	0	0	1	0	0	0	0	0	Bacteria; Lentisphaerae; MSBL3; uncultured bacterium
1213	0	0	0	0	0	0	0	0	0	0	0	0	0	0	0	0	0	0	1	0	0	0	0	0	0	0	Bacteria; Lentisphaerae; MSBL3; uncultured bacterium
1214	0	0	0	0	0	0	0	0	0	0	0	0	0	0	1	0	0	0	0	0	0	0	0	0	0	0	Bacteria; Lentisphaerae; Oligosphaeria; uncultured bacterium
1215	0	1	0	0	0	0	0	0	0	0	0	0	0	0	0	0	0	0	0	0	0	0	0	0	0	0	Bacteria; Lentisphaerae; Oligosphaeria; uncultured marine bacterium
1216	0	0	0	0	0	0	0	0	0	0	0	0	0	0	1	0	0	0	0	0	0	0	0	0	0	0	Bacteria; Lentisphaerae; SS1-B-03-39; uncultured bacterium
1217	0	0	0	0	0	0	0	0	0	0	0	0	0	0	2	0	0	0	0	0	0	0	0	0	0	0	Bacteria; Nitrospirae; Nitrospira; Nitrospirales; Nitrospiraceae; Nitrospira; uncultured Nitrospirae bacterium
1218	0	0	0	0	0	0	0	0	0	0	0	0	0	0	0	0	0	0	1	0	0	0	0	0	0	0	Bacteria; Planctomycetes; BD7-11; uncultured bacterium
1219	0	0	0	0	0	0	0	0	1	0	0	0	0	0	0	0	0	0	0	1	0	0	0	0	0	0	Bacteria; Planctomycetes; BD7-11; uncultured Planctomycetales bacterium
1220	1	0	0	0	0	0	0	0	0	0	0	0	0	0	0	0	0	0	0	0	0	0	0	0	0	0	Bacteria; Planctomycetes; OM190; uncultured bacterium
1221	0	0	0	0	0	0	0	0	0	0	1	0	1	0	0	0	0	0	0	0	0	0	0	0	0	0	Bacteria; Planctomycetes; OM190; unidentified planctomycete
1222	0	0	0	0	0	0	0	0	0	0	0	0	0	0	0	0	0	0	0	0	0	0	1	1	0	0	Bacteria; Planctomycetes; Phycisphaerae; Phycisphaerales; Phycisphaeraceae; CL500-3; uncultured Phycisphaeraceae bacterium
1223	0	0	0	1	0	0	0	0	0	0	0	0	0	0	0	0	0	0	0	0	0	0	0	0	0	0	Bacteria; Planctomycetes; Phycisphaerae; Phycisphaerales; Phycisphaeraceae; FS140-16B-02 marine group; uncultured organism
1224	0	0	0	0	0	1	0	0	0	0	0	0	0	0	0	0	0	0	0	0	0	0	0	0	0	0	Bacteria; Planctomycetes; Phycisphaerae; Phycisphaerales; Phycisphaeraceae; FS140-16B-02 marine group; uncultured organism
1225	0	0	1	0	0	0	0	0	0	0	0	0	0	0	0	0	0	0	0	0	0	0	0	0	0	0	Bacteria; Planctomycetes; vadinHA49; uncultured organism
1226	1	0	0	0	0	0	0	0	0	0	0	0	0	0	0	0	0	0	0	0	0	0	0	0	0	0	Bacteria; Planctomycetes; vadinHA49; uncultured soil bacterium
1227	0	0	0	0	0	0	0	0	0	0	1	0	0	0	0	0	0	0	1	0	0	0	0	0	0	0	Bacteria; Proteobacteria; AEGEAN-245; uncultured gamma proteobacterium
1228	0	0	0	0	0	0	0	0	0	0	0	3	0	0	0	0	0	0	0	0	0	0	0	0	0	0	Bacteria; Proteobacteria; Alphaproteobacteria; Caulobacterales; Caulobacteraceae; Brevundimonas; uncultured bacterium
1229	0	0	0	0	0	0	1	0	0	0	0	0	0	0	0	0	0	0	0	0	0	0	0	0	1	0	Bacteria; Proteobacteria; Alphaproteobacteria; Caulobacterales; Caulobacteraceae; Brevundimonas; uncultured bacterium
1230	6	4	0	0	0	0	0	0	2	0	0	0	0	0	2	0	0	0	0	0	0	0	0	0	0	0	Bacteria; Proteobacteria; Alphaproteobacteria; Caulobacterales; Caulobacteraceae; Caulobacter; uncultured Caulobacterales bacterium
1231	0	0	0	0	0	0	0	0	0	2	22	0	0	0	0	0	0	0	0	0	0	0	0	1	0	0	Bacteria; Proteobacteria; Alphaproteobacteria; Caulobacterales; Caulobacteraceae; Phenylobacterium; uncultured bacterium
1232	0	0	0	0	0	0	0	0	0	0	0	0	0	0	0	0	0	0	1	0	0	0	0	0	0	0	Bacteria; Proteobacteria; Alphaproteobacteria; Caulobacterales; Caulobacteraceae; Phenylobacterium; uncultured bacterium
1233	0	0	0	0	0	0	0	0	0	0	6	0	0	0	0	0	0	0	0	0	0	0	0	1	0	0	Bacteria; Proteobacteria; Alphaproteobacteria; Caulobacterales; Caulobacteraceae; Phenylobacterium; uncultured bacterium
1234	0	0	0	0	0	0	0	0	0	0	0	0	0	0	1	0	0	0	0	0	0	0	0	0	0	0	Bacteria; Proteobacteria; Alphaproteobacteria; Caulobacterales; Hyphomonadaceae; Woodsholea; Woodsholea maritima DSM 17123
1235	0	0	0	0	0	0	1	0	0	0	0	0	0	0	0	0	0	0	0	0	0	0	0	0	0	0	Bacteria; Proteobacteria; Alphaproteobacteria; DB1-14; marine metagenome
1236	0	0	0	0	0	0	0	0	0	0	0	0	0	0	1	0	0	0	0	0	0	0	0	0	0	0	Bacteria; Proteobacteria; Alphaproteobacteria; DB1-14; uncultured alpha proteobacterium
1237	0	0	1	0	0	0	0	0	0	0	0	0	0	0	0	0	0	0	0	0	0	0	0	0	0	0	Bacteria; Proteobacteria; Alphaproteobacteria; DB1-14; uncultured alpha proteobacterium
1238	0	0	0	0	0	0	0	0	0	0	0	0	0	0	1	0	0	0	0	0	0	0	0	0	0	0	Bacteria; Proteobacteria; Alphaproteobacteria; DB1-14; uncultured bacterium
1239	0	0	0	0	0	0	0	1	0	0	0	0	0	0	0	0	1	0	0	0	0	0	0	0	0	0	Bacteria; Proteobacteria; Alphaproteobacteria; DB1-14; uncultured bacterium
1240	0	0	0	0	0	0	0	0	0	0	0	0	0	0	0	1	0	0	0	0	0	0	0	0	0	0	Bacteria; Proteobacteria; Alphaproteobacteria; DB1-14; uncultured bacterium
1241	0	0	0	0	0	0	0	0	0	0	0	0	0	0	0	0	0	0	1	0	0	0	0	0	0	0	Bacteria; Proteobacteria; Alphaproteobacteria; DB1-14; uncultured bacterium
1242	0	0	0	0	0	1	0	0	0	0	0	0	0	0	0	0	0	0	0	0	0	0	0	0	0	0	Bacteria; Proteobacteria; Alphaproteobacteria; DB1-14; uncultured bacterium
1243	0	0	0	0	0	0	0	0	0	0	0	0	0	0	1	0	0	0	0	0	0	0	0	0	0	0	Bacteria; Proteobacteria; Alphaproteobacteria; Magnetococcales; Magnetococcaceae; Magnetococcus; magnetic coccus MP17
1244	0	0	0	0	0	0	0	0	1	0	16	3	0	0	0	0	0	0	0	0	0	1	0	12	6	0	Bacteria; Proteobacteria; Alphaproteobacteria; OCS116 clade; uncultured alpha proteobacterium
1245	5	24	23	0	0	0	0	0	0	0	0	0	0	1	0	13	0	0	0	0	0	0	0	0	0	0	Bacteria; Proteobacteria; Alphaproteobacteria; OCS116 clade; uncultured bacterium
1246	0	0	0	0	0	0	0	0	0	7	0	0	0	0	0	0	0	0	0	0	4	0	1	0	0	0	Bacteria; Proteobacteria; Alphaproteobacteria; OCS116 clade; uncultured bacterium
1247	0	0	0	1	2	0	0	0	2	0	0	3	1	0	0	0	0	0	0	0	0	0	0	0	0	1	Bacteria; Proteobacteria; Alphaproteobacteria; OCS116 clade; uncultured bacterium
1248	0	0	0	0	0	0	0	0	0	0	0	0	0	0	0	0	0	0	0	0	0	0	1	0	0	0	Bacteria; Proteobacteria; Alphaproteobacteria; OCS116 clade; uncultured bacterium
1249	0	0	0	0	0	0	0	0	0	0	0	0	0	0	0	0	0	0	0	0	0	0	0	0	0	1	Bacteria; Proteobacteria; Alphaproteobacteria; OCS116 clade; uncultured bacterium
1250	0	0	0	0	0	0	0	0	0	0	0	0	0	0	1	0	0	0	0	0	0	0	0	0	0	0	Bacteria; Proteobacteria; Alphaproteobacteria; OCS116 clade; uncultured bacterium
1251	0	0	0	0	0	0	0	0	0	0	0	0	0	0	0	0	0	0	0	0	0	1	0	0	0	0	Bacteria; Proteobacteria; Alphaproteobacteria; OCS116 clade; uncultured bacterium
1252	0	0	0	0	0	0	0	0	0	0	0	0	0	0	0	0	0	0	1	0	0	1	0	0	0	0	Bacteria; Proteobacteria; Alphaproteobacteria; OCS116 clade; uncultured bacterium
1253	0	0	0	0	0	0	0	0	0	0	0	0	0	0	0	0	0	0	0	1	0	0	0	0	0	0	Bacteria; Proteobacteria; Alphaproteobacteria; OCS116 clade; uncultured bacterium
1254	0	0	0	0	0	0	0	0	0	0	0	0	0	0	0	0	0	0	0	0	0	2	0	0	0	0	Bacteria; Proteobacteria; Alphaproteobacteria; OCS116 clade; uncultured bacterium
1255	2	0	0	397	3	2	0	0	14	2	24	27	316	0	0	0	1	0	0	1	0	0	1	13	4	142	Bacteria; Proteobacteria; Alphaproteobacteria; OCS116 clade; uncultured bacterium
1256	0	0	0	0	0	0	0	0	0	0	0	0	0	0	1	0	0	0	0	0	0	0	0	0	0	0	Bacteria; Proteobacteria; Alphaproteobacteria; OCS116 clade; uncultured bacterium
1257	0	0	0	0	0	0	0	0	0	0	0	0	0	0	0	0	0	0	0	0	0	0	1	0	0	0	Bacteria; Proteobacteria; Alphaproteobacteria; OCS116 clade; uncultured bacterium
1258	0	2	0	0	0	0	0	0	0	0	0	0	0	0	0	0	0	0	0	0	0	0	0	0	0	0	Bacteria; Proteobacteria; Alphaproteobacteria; OCS116 clade; uncultured bacterium
1259	0	0	0	0	0	0	0	0	0	0	0	0	0	0	0	0	0	0	0	0	0	0	0	0	0	1	Bacteria; Proteobacteria; Alphaproteobacteria; OCS116 clade; uncultured bacterium
1260	0	0	0	0	0	0	0	0	0	1	0	0	0	0	0	0	0	0	0	0	0	0	0	0	0	3	Bacteria; Proteobacteria; Alphaproteobacteria; OCS116 clade; uncultured bacterium
1261	0	0	0	1	0	0	0	0	2	0	4	7	0	0	0	0	0	1	1	0	0	0	1	0	1	1	Bacteria; Proteobacteria; Alphaproteobacteria; OCS116 clade; uncultured bacterium
1262	0	0	0	0	0	0	0	0	0	0	0	0	0	0	0	0	0	0	0	0	0	0	0	0	0	2	Bacteria; Proteobacteria; Alphaproteobacteria; OCS116 clade; uncultured bacterium
1263	0	0	0	0	0	0	0	0	0	0	0	0	0	0	0	0	0	0	0	0	0	0	0	0	0	1	Bacteria; Proteobacteria; Alphaproteobacteria; OCS116 clade; uncultured Candidatus Pelagibacter sp.
1264	0	0	0	0	0	0	0	0	0	0	0	0	0	0	0	0	0	0	0	0	0	0	1	0	0	0	Bacteria; Proteobacteria; Alphaproteobacteria; OCS116 clade; uncultured OCS116 cluster bacterium
1265	0	0	0	0	0	0	0	0	0	0	0	0	0	0	0	0	0	0	0	0	0	0	4	0	0	0	Bacteria; Proteobacteria; Alphaproteobacteria; OCS116 clade; uncultured OCS116 cluster bacterium
1266	0	0	0	0	0	0	0	0	0	22	1	0	0	0	0	0	0	0	0	0	0	0	1	0	0	0	Bacteria; Proteobacteria; Alphaproteobacteria; OCS116 clade; uncultured OCS116 cluster bacterium
1267	0	0	0	0	0	0	0	0	0	0	0	0	1	0	0	0	0	0	0	0	0	0	0	0	0	0	Bacteria; Proteobacteria; Alphaproteobacteria; OCS116 clade; uncultured PS1 clade bacterium
1268	0	0	0	0	0	0	0	0	0	0	0	0	0	4	0	0	0	0	0	0	0	0	0	0	0	0	Bacteria; Proteobacteria; Alphaproteobacteria; OCS116 clade; uncultured PS1 clade bacterium
1269	0	0	0	0	0	0	0	0	0	0	0	0	0	0	0	10	5	0	0	0	0	0	0	0	0	0	Bacteria; Proteobacteria; Alphaproteobacteria; OCS116 clade; uncultured PS1 clade bacterium
1270	0	0	0	0	0	0	0	0	0	0	0	0	0	0	0	0	1	0	0	6	0	0	0	0	0	0	Bacteria; Proteobacteria; Alphaproteobacteria; OCS116 clade; uncultured PS1 clade bacterium
1271	0	0	3	0	0	0	0	0	0	0	0	0	0	0	0	0	0	0	0	0	0	1	0	0	0	0	Bacteria; Proteobacteria; Alphaproteobacteria; OCS116 clade; uncultured PS1 clade bacterium
1272	0	0	0	0	0	0	0	0	0	0	0	0	0	0	0	0	0	0	0	0	0	0	0	0	1	0	Bacteria; Proteobacteria; Alphaproteobacteria; OCS116 clade; uncultured PS1 clade bacterium
1273	0	0	0	3	0	23	0	0	0	0	0	0	1	0	0	0	0	0	0	0	0	0	0	0	0	0	Bacteria; Proteobacteria; Alphaproteobacteria; OCS116 clade; uncultured PS1 clade bacterium
1274	0	0	0	0	0	0	0	0	0	0	0	0	0	8	0	0	0	0	0	0	0	10	0	0	0	0	Bacteria; Proteobacteria; Alphaproteobacteria; OCS116 clade; uncultured PS1 clade bacterium
1275	0	0	0	1	0	0	0	0	0	0	0	0	1	0	0	0	0	0	0	0	0	0	0	0	0	1	Bacteria; Proteobacteria; Alphaproteobacteria; OCS116 clade; uncultured PS1 clade bacterium
1276	340	187	632	19	26	55	24	129	7	0	1	20	11	136	20	384	7	22	64	121	76	7	1	4	9	5	Bacteria; Proteobacteria; Alphaproteobacteria; OCS116 clade; uncultured PS1 clade bacterium
1277	0	0	0	0	0	0	0	0	0	0	0	0	0	0	0	0	0	0	0	1	0	0	0	0	0	0	Bacteria; Proteobacteria; Alphaproteobacteria; Rhizobiales; 1174-901-12; uncultured bacterium
1278	0	0	0	1	0	0	0	0	0	0	0	0	0	0	0	0	0	0	0	0	0	0	0	0	0	0	Bacteria; Proteobacteria; Alphaproteobacteria; Rhizobiales; Beijerinckiaceae; Methylocella; uncultured bacterium
1279	0	1	0	1	0	0	0	0	0	0	0	0	0	1	1	0	0	0	0	0	0	0	0	0	0	0	Bacteria; Proteobacteria; Alphaproteobacteria; Rhizobiales; Bradyrhizobiaceae; Bradyrhizobium; uncultured bacterium
1280	0	0	0	0	0	0	0	0	0	0	0	0	0	0	0	0	0	0	0	1	0	0	0	0	0	0	Bacteria; Proteobacteria; Alphaproteobacteria; Rhizobiales; F0723; uncultured bacterium
1281	0	0	0	0	0	0	0	0	0	0	0	0	0	0	0	0	0	0	0	0	0	0	0	0	0	1	Bacteria; Proteobacteria; Alphaproteobacteria; Rhizobiales; Hyphomicrobiaceae; Devosia; Devosia sp. R-36585
1282	0	0	0	0	0	0	0	0	0	0	0	0	0	0	0	0	0	0	0	0	0	0	1	1	0	0	Bacteria; Proteobacteria; Alphaproteobacteria; Rhizobiales; Hyphomicrobiaceae; Filomicrobium; uncultured alpha proteobacterium
1283	0	0	0	0	0	0	0	0	1	0	0	0	0	0	0	0	0	0	0	0	0	0	0	0	0	0	Bacteria; Proteobacteria; Alphaproteobacteria; Rhizobiales; Hyphomicrobiaceae; Hyphomicrobium; uncultured bacterium
1284	0	0	0	0	0	0	0	0	1	0	0	0	0	0	0	0	0	0	0	0	0	0	0	0	0	0	Bacteria; Proteobacteria; Alphaproteobacteria; Rhizobiales; Hyphomicrobiaceae; Hyphomicrobium; uncultured bacterium
1285	0	0	0	0	0	0	0	0	0	0	0	0	0	0	0	0	0	0	0	0	0	0	0	0	0	1	Bacteria; Proteobacteria; Alphaproteobacteria; Rhizobiales; Hyphomicrobiaceae; Pelagibacterium; uncultured bacterium
1286	0	0	0	0	0	0	0	0	0	0	1	0	0	0	0	0	0	0	0	0	0	0	0	0	0	0	Bacteria; Proteobacteria; Alphaproteobacteria; Rhizobiales; Methylobacteriaceae; Methylobacterium; Methylobacterium aquaticum
1287	0	1	0	0	0	0	0	0	0	0	0	0	0	0	0	0	0	0	0	0	0	0	0	0	0	0	Bacteria; Proteobacteria; Alphaproteobacteria; Rhizobiales; Methylobacteriaceae; Methylobacterium; Methylobacterium sp. FXJ3.011
1288	1	0	0	0	0	3	0	0	0	0	0	1	0	2	0	1	0	0	7	3	1	0	1	0	0	0	Bacteria; Proteobacteria; Alphaproteobacteria; Rhizobiales; Methylobacteriaceae; Methylobacterium; uncultured bacterium
1289	0	0	1	0	0	0	0	2	1	1	0	0	1	0	3	1	0	0	1	0	0	0	0	0	0	0	Bacteria; Proteobacteria; Alphaproteobacteria; Rhizobiales; Methylobacteriaceae; Methylobacterium; uncultured bacterium
1290	0	0	0	0	0	0	0	0	0	0	0	0	0	0	0	0	0	0	0	0	0	0	1	0	0	0	Bacteria; Proteobacteria; Alphaproteobacteria; Rhizobiales; Methylobacteriaceae; Methylobacterium; uncultured Methylobacterium sp.
1291	0	0	0	0	0	0	0	0	0	0	0	0	0	0	1	0	0	0	0	0	0	0	0	0	0	0	Bacteria; Proteobacteria; Alphaproteobacteria; Rhizobiales; Phyllobacteriaceae; Hoeflea; uncultured bacterium
1292	0	0	0	0	0	0	0	0	0	0	0	0	0	0	0	0	0	0	0	1	0	0	0	0	0	0	Bacteria; Proteobacteria; Alphaproteobacteria; Rhizobiales; Phyllobacteriaceae; Nitratireductor; uncultured bacterium
1293	0	0	0	0	0	0	0	0	0	0	0	0	0	0	0	0	0	0	0	0	0	14	0	0	0	0	Bacteria; Proteobacteria; Alphaproteobacteria; Rhizobiales; Phyllobacteriaceae; Pseudahrensia; Pseudahrensia aquimaris
1294	0	0	0	0	0	0	0	0	0	0	0	0	0	0	0	0	0	0	0	0	0	0	0	0	1	0	Bacteria; Proteobacteria; Alphaproteobacteria; Rhizobiales; Phyllobacteriaceae; Pseudahrensia; Pseudahrensia aquimaris
1295	0	0	0	0	0	0	0	0	0	0	0	0	0	0	0	0	0	0	0	0	0	0	0	0	12	0	Bacteria; Proteobacteria; Alphaproteobacteria; Rhizobiales; Phyllobacteriaceae; Pseudahrensia; Pseudahrensia aquimaris
1296	0	0	0	0	0	0	0	0	0	0	0	0	0	0	1	0	0	0	0	0	0	0	0	0	0	0	Bacteria; Proteobacteria; Alphaproteobacteria; Rhizobiales; Phyllobacteriaceae; Pseudahrensia; uncultured bacterium
1297	0	0	0	0	0	0	0	0	0	0	0	0	0	0	1	0	0	0	0	0	0	0	0	0	0	0	Bacteria; Proteobacteria; Alphaproteobacteria; Rhizobiales; Phyllobacteriaceae; Pseudahrensia; uncultured bacterium
1298	0	0	0	0	0	0	0	0	0	0	0	0	0	0	0	0	0	0	0	0	0	0	1	0	0	0	Bacteria; Proteobacteria; Alphaproteobacteria; Rhizobiales; Rhizobiaceae; Rhizobium; uncultured bacterium
1299	0	0	0	0	0	0	0	0	0	0	0	0	0	1	0	0	0	0	0	0	0	0	0	0	0	0	Bacteria; Proteobacteria; Alphaproteobacteria; Rhizobiales; Rhizobiaceae; Rhizobium; uncultured bacterium
1300	0	0	0	0	0	0	0	1	0	0	0	0	0	0	0	0	0	0	0	0	0	0	0	0	0	0	Bacteria; Proteobacteria; Alphaproteobacteria; Rhizobiales; Rhizobiales Incertae Sedis; Rhizomicrobium; uncultured alpha proteobacterium
1301	0	0	0	1	0	0	0	0	0	0	0	0	0	0	0	0	0	0	0	0	0	0	0	0	0	0	Bacteria; Proteobacteria; Alphaproteobacteria; Rhizobiales; Rhizobiales Incertae Sedis; Rhizomicrobium; uncultured proteobacterium
1302	0	0	0	0	0	0	0	0	0	0	0	0	0	0	0	0	0	0	0	0	0	0	1	0	0	0	Bacteria; Proteobacteria; Alphaproteobacteria; Rhizobiales; Rhodobiaceae; Anderseniella; uncultured alpha proteobacterium
1303	0	0	0	0	0	0	0	0	0	0	3	0	0	0	0	0	0	0	0	0	0	0	0	7	0	0	Bacteria; Proteobacteria; Alphaproteobacteria; Rhizobiales; Rhodobiaceae; Parvibaculum; sediment bacterium 22-39
1304	0	0	0	0	0	0	0	0	0	0	0	0	0	0	1	0	0	0	0	0	0	0	0	0	0	0	Bacteria; Proteobacteria; Alphaproteobacteria; Rhizobiales; Rhodobiaceae; Rhodobium; uncultured alpha proteobacterium
1305	0	0	0	0	0	0	0	0	0	0	0	0	0	0	0	0	0	0	0	0	0	0	1	0	0	0	Bacteria; Proteobacteria; Alphaproteobacteria; Rhizobiales; Rhodobiaceae; Rhodobium; uncultured alpha proteobacterium
1306	0	0	0	0	0	0	0	0	0	0	0	0	0	0	0	1	0	0	0	0	0	0	0	0	0	0	Bacteria; Proteobacteria; Alphaproteobacteria; Rhizobiales; Rhodobiaceae; Rhodobium; uncultured alpha proteobacterium
1307	0	0	0	1	0	0	0	0	0	0	0	1	0	0	0	1	0	0	0	0	0	0	1	0	1	0	Bacteria; Proteobacteria; Alphaproteobacteria; Rhizobiales; Rhodobiaceae; Rhodobium; uncultured alpha proteobacterium
1308	0	0	0	0	0	0	0	0	0	0	0	0	0	0	0	0	0	0	0	0	0	1	0	0	0	0	Bacteria; Proteobacteria; Alphaproteobacteria; Rhizobiales; Rhodobiaceae; Rhodobium; uncultured alpha proteobacterium
1309	0	0	0	0	0	0	0	0	0	0	0	0	0	3	0	0	0	0	0	0	0	0	0	0	0	0	Bacteria; Proteobacteria; Alphaproteobacteria; Rhizobiales; Rhodobiaceae; Rhodobium; uncultured alpha proteobacterium
1310	0	0	0	0	0	0	0	0	0	0	0	0	0	0	1	0	0	0	0	0	0	0	0	0	0	0	Bacteria; Proteobacteria; Alphaproteobacteria; Rhizobiales; Rhodobiaceae; Rhodobium; uncultured alpha proteobacterium
1311	6	0	0	1	0	9	0	0	0	0	0	0	1	0	9	1	0	0	0	1	0	0	1	0	0	0	Bacteria; Proteobacteria; Alphaproteobacteria; Rhizobiales; Rhodobiaceae; Rhodobium; uncultured alpha proteobacterium
1312	0	0	0	0	0	0	0	0	0	0	0	0	0	0	1	0	0	0	0	0	0	0	0	0	0	0	Bacteria; Proteobacteria; Alphaproteobacteria; Rhizobiales; Rhodobiaceae; Rhodobium; uncultured alpha proteobacterium
1313	0	0	0	0	0	0	0	0	0	0	0	0	0	0	0	0	0	0	0	0	0	0	0	0	0	1	Bacteria; Proteobacteria; Alphaproteobacteria; Rhizobiales; Rhodobiaceae; Rhodobium; uncultured alpha proteobacterium
1314	0	0	0	1	0	0	0	0	0	0	0	0	0	0	0	0	0	0	1	0	0	0	0	0	2	0	Bacteria; Proteobacteria; Alphaproteobacteria; Rhizobiales; Rhodobiaceae; Rhodobium; uncultured alpha proteobacterium
1315	0	0	0	0	0	0	0	0	0	0	0	0	0	0	0	0	0	1	0	0	0	0	0	0	0	0	Bacteria; Proteobacteria; Alphaproteobacteria; Rhizobiales; Rhodobiaceae; Rhodobium; uncultured alpha proteobacterium
1316	0	0	0	0	0	0	0	0	0	0	0	0	0	0	0	0	0	0	0	0	0	0	0	0	0	4	Bacteria; Proteobacteria; Alphaproteobacteria; Rhizobiales; Rhodobiaceae; Rhodobium; uncultured alpha proteobacterium
1317	0	16	39	11	8	12	9	51	16	20	5	4	6	27	154	13	3	15	192	118	57	9	26	9	2	8	Bacteria; Proteobacteria; Alphaproteobacteria; Rhizobiales; Rhodobiaceae; Rhodobium; uncultured alpha proteobacterium
1318	0	0	0	0	0	0	0	0	0	0	0	0	0	0	1	0	0	0	0	0	0	0	0	0	0	0	Bacteria; Proteobacteria; Alphaproteobacteria; Rhizobiales; Rhodobiaceae; Rhodobium; uncultured bacterium
1319	0	0	0	0	0	0	0	0	0	0	0	0	0	0	0	0	0	0	0	0	0	0	0	0	1	0	Bacteria; Proteobacteria; Alphaproteobacteria; Rhizobiales; Rhodobiaceae; Rhodobium; uncultured bacterium
1320	0	0	0	0	0	0	0	0	0	0	1	0	0	0	0	0	0	0	0	0	0	0	0	0	0	0	Bacteria; Proteobacteria; Alphaproteobacteria; Rhizobiales; Xanthobacteraceae; Xanthobacter; Xanthobacter sp. ROi16
1321	0	0	0	0	0	0	0	0	0	0	0	0	0	0	0	0	0	0	0	0	1	0	0	0	0	0	Bacteria; Proteobacteria; Alphaproteobacteria; Rhodobacterales; Rhodobacteraceae; Amaricoccus; uncultured Rhodobacterales bacterium
1322	0	0	0	0	0	0	0	0	0	0	0	0	0	0	0	0	0	0	0	0	0	0	0	0	1	0	Bacteria; Proteobacteria; Alphaproteobacteria; Rhodobacterales; Rhodobacteraceae; Antarctobacter; Antarctobacter sp. R26
1323	0	0	0	4	0	0	0	0	0	0	0	0	0	0	0	0	33	0	0	0	0	0	0	0	0	0	Bacteria; Proteobacteria; Alphaproteobacteria; Rhodobacterales; Rhodobacteraceae; Candidatus Planktomarina (DC5-80-3 lineage); uncultured bacterium
1324	0	0	0	0	0	0	0	0	0	0	0	0	0	0	0	0	0	0	1	0	0	0	0	0	0	0	Bacteria; Proteobacteria; Alphaproteobacteria; Rhodobacterales; Rhodobacteraceae; Candidatus Planktomarina (DC5-80-3 lineage); uncultured bacterium
1325	0	0	0	0	0	0	0	0	0	0	0	0	0	0	0	0	0	1	0	0	0	0	0	0	0	0	Bacteria; Proteobacteria; Alphaproteobacteria; Rhodobacterales; Rhodobacteraceae; Candidatus Planktomarina (DC5-80-3 lineage); uncultured bacterium
1326	0	0	0	0	12	0	0	12	0	0	0	0	0	0	0	1	0	1	0	12	0	0	1	0	0	1	Bacteria; Proteobacteria; Alphaproteobacteria; Rhodobacterales; Rhodobacteraceae; Candidatus Planktomarina (DC5-80-3 lineage); uncultured bacterium
1327	0	0	0	0	0	0	0	0	9	0	0	0	0	0	0	0	0	0	0	0	0	0	0	0	0	0	Bacteria; Proteobacteria; Alphaproteobacteria; Rhodobacterales; Rhodobacteraceae; Candidatus Planktomarina (DC5-80-3 lineage); uncultured bacterium
1328	0	0	0	0	0	0	0	0	0	0	0	0	0	0	0	0	0	0	0	0	0	0	0	0	0	1	Bacteria; Proteobacteria; Alphaproteobacteria; Rhodobacterales; Rhodobacteraceae; Candidatus Planktomarina (DC5-80-3 lineage); uncultured bacterium
1329	0	0	0	0	0	0	0	0	0	0	0	0	0	0	0	0	0	0	0	1	0	0	0	0	0	0	Bacteria; Proteobacteria; Alphaproteobacteria; Rhodobacterales; Rhodobacteraceae; Candidatus Planktomarina (DC5-80-3 lineage); uncultured bacterium
1330	0	0	0	0	0	0	0	0	0	0	0	0	0	0	0	0	0	0	0	4	0	0	0	0	0	0	Bacteria; Proteobacteria; Alphaproteobacteria; Rhodobacterales; Rhodobacteraceae; Candidatus Planktomarina (DC5-80-3 lineage); uncultured bacterium
1331	0	0	0	0	0	0	0	0	0	0	0	0	0	0	0	0	0	0	0	0	0	0	0	6	0	0	Bacteria; Proteobacteria; Alphaproteobacteria; Rhodobacterales; Rhodobacteraceae; Candidatus Planktomarina (DC5-80-3 lineage); uncultured bacterium
1332	0	0	0	8	0	9	0	0	0	6	0	0	0	21	0	12	35	9	0	0	4	5	2	0	0	2	Bacteria; Proteobacteria; Alphaproteobacteria; Rhodobacterales; Rhodobacteraceae; Candidatus Planktomarina (DC5-80-3 lineage); uncultured bacterium
1333	1953	639	1655	653	648	572	434	1092	849	947	632	578	717	2243	141	1517	61	698	1156	2145	1627	669	554	384	604	213	Bacteria; Proteobacteria; Alphaproteobacteria; Rhodobacterales; Rhodobacteraceae; Candidatus Planktomarina (DC5-80-3 lineage); uncultured bacterium
1334	0	0	0	0	0	0	0	0	0	0	0	0	0	0	0	0	0	0	0	0	0	0	0	0	0	4	Bacteria; Proteobacteria; Alphaproteobacteria; Rhodobacterales; Rhodobacteraceae; Candidatus Planktomarina (DC5-80-3 lineage); uncultured bacterium
1335	0	0	0	0	0	0	0	0	0	0	0	0	0	55	0	0	0	0	0	0	0	0	0	0	0	0	Bacteria; Proteobacteria; Alphaproteobacteria; Rhodobacterales; Rhodobacteraceae; Candidatus Planktomarina (DC5-80-3 lineage); uncultured bacterium
1336	0	0	0	0	0	0	0	0	0	0	0	0	0	0	0	0	0	0	0	0	0	0	0	0	0	1	Bacteria; Proteobacteria; Alphaproteobacteria; Rhodobacterales; Rhodobacteraceae; Candidatus Planktomarina (DC5-80-3 lineage); uncultured bacterium
1337	0	0	0	0	0	0	0	0	0	0	0	0	0	0	0	0	0	0	0	0	0	0	0	0	0	1	Bacteria; Proteobacteria; Alphaproteobacteria; Rhodobacterales; Rhodobacteraceae; Candidatus Planktomarina (DC5-80-3 lineage); uncultured bacterium
1338	0	0	0	0	0	0	0	0	0	0	0	0	0	0	0	0	0	0	0	0	0	0	1	0	0	0	Bacteria; Proteobacteria; Alphaproteobacteria; Rhodobacterales; Rhodobacteraceae; Candidatus Planktomarina (DC5-80-3 lineage); uncultured marine bacterium
1339	0	0	0	0	0	0	0	0	0	0	0	0	0	1	0	0	0	0	0	0	0	0	0	0	0	0	Bacteria; Proteobacteria; Alphaproteobacteria; Rhodobacterales; Rhodobacteraceae; Candidatus Planktomarina (DC5-80-3 lineage); uncultured marine bacterium
1340	0	0	0	0	0	0	0	0	0	0	0	0	0	0	0	16	0	0	0	0	0	0	0	0	0	0	Bacteria; Proteobacteria; Alphaproteobacteria; Rhodobacterales; Rhodobacteraceae; Candidatus Planktomarina (DC5-80-3 lineage); uncultured marine bacterium
1341	0	0	0	0	0	0	0	0	0	0	0	0	0	0	0	0	0	0	0	0	0	0	1	0	0	0	Bacteria; Proteobacteria; Alphaproteobacteria; Rhodobacterales; Rhodobacteraceae; Candidatus Planktomarina (DC5-80-3 lineage); uncultured marine bacterium
1342	0	0	0	0	0	0	0	0	0	0	0	0	0	0	0	0	0	0	0	0	0	0	0	0	0	1	Bacteria; Proteobacteria; Alphaproteobacteria; Rhodobacterales; Rhodobacteraceae; Candidatus Planktomarina (DC5-80-3 lineage); uncultured marine bacterium
1343	0	0	0	0	0	0	0	0	0	0	0	0	0	34	0	0	0	0	0	0	2	0	0	0	0	0	Bacteria; Proteobacteria; Alphaproteobacteria; Rhodobacterales; Rhodobacteraceae; Candidatus Planktomarina (DC5-80-3 lineage); uncultured Rhodobacteraceae bacterium
1344	0	3	0	0	0	0	0	0	0	0	0	0	0	0	0	0	0	0	0	0	0	0	0	0	0	0	Bacteria; Proteobacteria; Alphaproteobacteria; Rhodobacterales; Rhodobacteraceae; Candidatus Planktomarina (DC5-80-3 lineage); uncultured Rhodobacteraceae bacterium
1345	0	0	0	0	0	0	0	0	0	0	0	0	0	0	0	0	0	0	9	0	0	0	0	0	0	0	Bacteria; Proteobacteria; Alphaproteobacteria; Rhodobacterales; Rhodobacteraceae; Candidatus Planktomarina (DC5-80-3 lineage); uncultured Roseobacter sp.
1346	0	0	0	0	0	0	0	0	0	0	0	0	0	0	0	0	0	0	0	0	0	0	0	4	0	0	Bacteria; Proteobacteria; Alphaproteobacteria; Rhodobacterales; Rhodobacteraceae; Candidatus Planktomarina (DC5-80-3 lineage); uncultured Roseobacter sp.
1347	0	0	0	0	0	0	0	0	0	0	0	0	0	0	0	0	0	0	0	1	0	0	0	0	0	0	Bacteria; Proteobacteria; Alphaproteobacteria; Rhodobacterales; Rhodobacteraceae; Celeribacter; uncultured Roseobacter sp.
1348	0	0	0	0	0	0	0	0	0	0	0	0	0	0	0	0	0	0	0	0	0	0	1	0	0	0	Bacteria; Proteobacteria; Alphaproteobacteria; Rhodobacterales; Rhodobacteraceae; Defluviimonas; uncultured bacterium
1349	0	0	0	0	0	0	0	0	0	0	0	0	0	0	1	0	0	0	0	3	0	0	0	0	0	0	Bacteria; Proteobacteria; Alphaproteobacteria; Rhodobacterales; Rhodobacteraceae; Defluviimonas; uncultured bacterium
1350	0	0	0	0	0	0	0	0	0	0	0	0	0	0	1	0	0	0	0	0	0	0	0	0	0	0	Bacteria; Proteobacteria; Alphaproteobacteria; Rhodobacterales; Rhodobacteraceae; Defluviimonas; uncultured bacterium
1351	0	0	0	0	0	0	0	0	0	0	0	0	0	0	0	0	0	0	0	0	0	1	0	0	0	0	Bacteria; Proteobacteria; Alphaproteobacteria; Rhodobacterales; Rhodobacteraceae; Defluviimonas; uncultured bacterium
1352	0	0	0	0	0	0	0	1	0	0	0	0	0	0	0	0	0	0	0	0	0	0	0	0	0	0	Bacteria; Proteobacteria; Alphaproteobacteria; Rhodobacterales; Rhodobacteraceae; Defluviimonas; uncultured bacterium
1353	0	0	0	0	0	0	0	0	0	0	0	0	0	0	1	0	0	0	0	0	0	0	0	0	0	0	Bacteria; Proteobacteria; Alphaproteobacteria; Rhodobacterales; Rhodobacteraceae; Defluviimonas; uncultured marine bacterium
1354	0	0	0	0	0	0	0	0	0	0	0	0	0	1	0	0	0	0	0	0	0	0	0	0	0	0	Bacteria; Proteobacteria; Alphaproteobacteria; Rhodobacterales; Rhodobacteraceae; Defluviimonas; uncultured marine bacterium
1355	0	0	0	0	0	0	0	0	0	0	0	0	0	0	0	0	0	0	0	0	0	0	0	0	1	0	Bacteria; Proteobacteria; Alphaproteobacteria; Rhodobacterales; Rhodobacteraceae; Defluviimonas; uncultured marine bacterium
1356	0	0	0	0	0	0	0	0	0	0	0	0	0	0	0	0	0	0	1	0	0	0	0	0	0	0	Bacteria; Proteobacteria; Alphaproteobacteria; Rhodobacterales; Rhodobacteraceae; Defluviimonas; uncultured marine bacterium
1357	0	0	0	0	0	0	0	0	0	2	0	0	0	0	0	0	0	0	0	0	0	0	12	0	0	0	Bacteria; Proteobacteria; Alphaproteobacteria; Rhodobacterales; Rhodobacteraceae; Falsirhodobacter; uncultured soil bacterium
1358	0	0	0	0	0	0	0	0	0	0	0	0	0	0	0	0	0	1	0	0	0	0	0	0	0	0	Bacteria; Proteobacteria; Alphaproteobacteria; Rhodobacterales; Rhodobacteraceae; Gemmobacter; uncultured bacterium
1359	0	0	0	0	0	0	0	0	0	0	0	0	0	0	36	0	0	0	0	0	0	0	0	0	0	0	Bacteria; Proteobacteria; Alphaproteobacteria; Rhodobacterales; Rhodobacteraceae; Leisingera; alpha proteobacterium SOGA34
1360	0	0	0	0	0	0	0	0	0	0	0	0	0	0	1	0	0	0	0	0	0	0	0	0	0	0	Bacteria; Proteobacteria; Alphaproteobacteria; Rhodobacterales; Rhodobacteraceae; Lentibacter; uncultured alpha proteobacterium
1361	0	0	0	0	0	0	7	0	0	0	0	0	0	5	0	0	0	0	0	115	0	0	0	0	0	0	Bacteria; Proteobacteria; Alphaproteobacteria; Rhodobacterales; Rhodobacteraceae; Lentibacter; uncultured bacterium
1362	0	0	0	0	0	0	0	0	0	0	0	0	0	18	0	0	0	0	0	0	0	0	0	0	0	0	Bacteria; Proteobacteria; Alphaproteobacteria; Rhodobacterales; Rhodobacteraceae; Lentibacter; uncultured marine bacterium
1363	0	0	0	0	0	0	0	0	0	0	0	0	0	0	0	0	0	0	0	0	1	0	0	0	0	0	Bacteria; Proteobacteria; Alphaproteobacteria; Rhodobacterales; Rhodobacteraceae; Lentibacter; uncultured marine bacterium
1364	0	0	0	0	0	0	0	0	0	0	0	0	0	0	0	1	0	0	0	0	0	0	0	0	0	0	Bacteria; Proteobacteria; Alphaproteobacteria; Rhodobacterales; Rhodobacteraceae; Lentibacter; uncultured marine bacterium
1365	0	0	0	0	0	0	0	0	0	0	0	0	0	0	0	0	0	0	0	16	0	0	0	0	0	0	Bacteria; Proteobacteria; Alphaproteobacteria; Rhodobacterales; Rhodobacteraceae; Lentibacter; uncultured marine bacterium
1366	0	0	0	0	0	0	0	0	0	0	0	0	0	0	0	0	0	0	0	0	5	0	0	0	0	0	Bacteria; Proteobacteria; Alphaproteobacteria; Rhodobacterales; Rhodobacteraceae; Lentibacter; uncultured marine bacterium
1367	0	0	0	0	0	0	0	0	0	0	0	0	0	0	0	0	0	0	0	0	0	0	0	0	1	0	Bacteria; Proteobacteria; Alphaproteobacteria; Rhodobacterales; Rhodobacteraceae; Lentibacter; uncultured Nereida sp.
1368	0	0	0	0	0	0	0	0	0	0	0	0	0	0	0	0	0	0	0	0	0	9	0	0	0	0	Bacteria; Proteobacteria; Alphaproteobacteria; Rhodobacterales; Rhodobacteraceae; Lentibacter; uncultured Nereida sp.
1369	0	0	0	0	0	0	0	0	0	0	0	0	0	0	0	0	0	0	0	0	0	0	0	0	5	0	Bacteria; Proteobacteria; Alphaproteobacteria; Rhodobacterales; Rhodobacteraceae; Lentibacter; uncultured Nereida sp.
1370	0	0	0	0	0	0	0	0	0	0	0	0	0	0	0	0	0	0	0	1	0	0	0	0	0	0	Bacteria; Proteobacteria; Alphaproteobacteria; Rhodobacterales; Rhodobacteraceae; Lentibacter; uncultured Nereida sp.
1371	0	0	0	0	0	0	0	0	0	0	0	0	0	0	0	0	0	0	1	0	0	0	0	0	0	0	Bacteria; Proteobacteria; Alphaproteobacteria; Rhodobacterales; Rhodobacteraceae; Lentibacter; uncultured Nereida sp.
1372	0	0	0	0	0	0	0	0	0	0	0	0	0	0	0	0	0	0	0	0	0	0	0	0	7	0	Bacteria; Proteobacteria; Alphaproteobacteria; Rhodobacterales; Rhodobacteraceae; Litorimicrobium; uncultured bacterium
1373	0	0	0	0	0	0	0	0	0	0	0	0	0	0	0	0	0	0	0	1	0	0	0	0	0	0	Bacteria; Proteobacteria; Alphaproteobacteria; Rhodobacterales; Rhodobacteraceae; Litorimicrobium; uncultured Roseovarius sp.
1374	0	0	0	0	0	0	0	0	0	0	0	0	0	0	0	0	0	0	0	1	0	0	0	0	1	0	Bacteria; Proteobacteria; Alphaproteobacteria; Rhodobacterales; Rhodobacteraceae; Litorimicrobium; uncultured Roseovarius sp.
1375	0	0	0	0	0	0	0	0	0	0	0	0	0	0	0	0	0	0	0	1	0	0	0	0	0	0	Bacteria; Proteobacteria; Alphaproteobacteria; Rhodobacterales; Rhodobacteraceae; Loktanella; Ruegeria sp. BFR24b
1376	0	0	0	0	0	0	0	9	0	0	0	0	0	0	0	0	0	0	0	0	0	0	0	0	0	0	Bacteria; Proteobacteria; Alphaproteobacteria; Rhodobacterales; Rhodobacteraceae; Loktanella; uncultured bacterium
1377	7	23	79	0	9	13	6	17	2	5	2	5	0	0	0	10	0	0	14	2	3	0	0	0	0	0	Bacteria; Proteobacteria; Alphaproteobacteria; Rhodobacterales; Rhodobacteraceae; Loktanella; uncultured bacterium
1378	0	0	0	0	0	0	0	0	0	0	0	0	0	6	0	0	0	0	0	0	0	0	0	0	0	0	Bacteria; Proteobacteria; Alphaproteobacteria; Rhodobacterales; Rhodobacteraceae; Loktanella; uncultured bacterium
1379	0	0	0	0	0	0	0	0	0	0	0	0	0	0	0	0	0	0	0	0	0	0	0	0	1	0	Bacteria; Proteobacteria; Alphaproteobacteria; Rhodobacterales; Rhodobacteraceae; Loktanella; uncultured marine bacterium
1380	0	0	0	0	0	0	0	0	0	0	0	0	0	0	0	0	0	0	0	1	0	0	0	0	0	0	Bacteria; Proteobacteria; Alphaproteobacteria; Rhodobacterales; Rhodobacteraceae; Loktanella; uncultured marine bacterium
1381	0	0	0	0	0	0	0	0	0	0	0	0	0	0	0	0	0	0	0	1	0	0	0	0	0	0	Bacteria; Proteobacteria; Alphaproteobacteria; Rhodobacterales; Rhodobacteraceae; Marivita; uncultured bacterium
1382	0	0	0	0	0	0	0	0	0	4	0	0	0	0	0	0	0	0	0	0	0	0	0	0	0	0	Bacteria; Proteobacteria; Alphaproteobacteria; Rhodobacterales; Rhodobacteraceae; Marivita; uncultured bacterium
1383	0	5	0	0	1	1	0	7	0	0	0	1	0	0	1	7	1	0	0	0	0	0	0	0	0	0	Bacteria; Proteobacteria; Alphaproteobacteria; Rhodobacterales; Rhodobacteraceae; Octadecabacter; uncultured marine bacterium
1384	0	0	0	0	0	0	0	0	0	0	0	0	0	0	0	0	0	0	1	0	0	0	0	0	0	0	Bacteria; Proteobacteria; Alphaproteobacteria; Rhodobacterales; Rhodobacteraceae; Paracoccus; uncultured alpha proteobacterium
1385	0	0	0	0	0	0	0	0	0	0	0	0	0	0	4	0	0	0	0	0	0	0	0	0	0	0	Bacteria; Proteobacteria; Alphaproteobacteria; Rhodobacterales; Rhodobacteraceae; Pelagicola; uncultured Roseobacter sp.
1386	0	0	0	0	0	0	0	5	0	0	0	0	0	4	1	0	0	0	6	0	3	0	0	0	0	0	Bacteria; Proteobacteria; Alphaproteobacteria; Rhodobacterales; Rhodobacteraceae; Phaeobacter; uncultured bacterium
1387	0	0	0	0	0	0	0	0	0	0	0	0	0	0	0	0	0	7	0	0	0	0	0	0	0	0	Bacteria; Proteobacteria; Alphaproteobacteria; Rhodobacterales; Rhodobacteraceae; Phaeomarinomonas; uncultured bacterium
1388	0	0	0	0	0	0	0	2	2	0	0	0	0	1	0	0	1	0	0	0	0	0	0	0	0	0	Bacteria; Proteobacteria; Alphaproteobacteria; Rhodobacterales; Rhodobacteraceae; Planktotalea; uncultured bacterium
1389	0	0	0	0	0	0	0	1	0	0	0	0	4	0	0	0	0	0	0	30	0	0	0	0	0	0	Bacteria; Proteobacteria; Alphaproteobacteria; Rhodobacterales; Rhodobacteraceae; Planktotalea; uncultured bacterium
1390	131	27	72	0	0	6	8	0	0	4	0	0	0	82	25	4	0	0	5	0	7	0	0	0	0	0	Bacteria; Proteobacteria; Alphaproteobacteria; Rhodobacterales; Rhodobacteraceae; Planktotalea; uncultured bacterium
1391	0	0	0	0	0	0	0	0	0	0	0	0	0	0	1	0	0	0	0	0	0	0	0	0	0	0	Bacteria; Proteobacteria; Alphaproteobacteria; Rhodobacterales; Rhodobacteraceae; Planktotalea; uncultured bacterium
1392	0	0	0	0	0	0	0	0	0	0	0	0	0	1	0	1	3	0	1	0	0	0	0	0	0	0	Bacteria; Proteobacteria; Alphaproteobacteria; Rhodobacterales; Rhodobacteraceae; Planktotalea; uncultured bacterium
1393	9	3	0	0	0	0	0	0	0	0	0	0	0	1	0	0	0	0	0	1	0	0	0	0	0	0	Bacteria; Proteobacteria; Alphaproteobacteria; Rhodobacterales; Rhodobacteraceae; Planktotalea; uncultured bacterium
1394	0	0	0	0	0	0	0	0	0	0	0	0	0	0	0	0	0	1	0	0	0	0	0	0	0	0	Bacteria; Proteobacteria; Alphaproteobacteria; Rhodobacterales; Rhodobacteraceae; Profundibacterium; uncultured bacterium
1395	0	0	0	0	0	0	0	0	0	0	0	0	0	0	0	0	0	0	0	1	0	0	0	0	0	0	Bacteria; Proteobacteria; Alphaproteobacteria; Rhodobacterales; Rhodobacteraceae; Pseudoruegeria; uncultured bacterium
1396	0	0	0	0	0	0	0	0	0	0	0	0	0	0	0	0	0	0	0	0	0	0	0	1	0	0	Bacteria; Proteobacteria; Alphaproteobacteria; Rhodobacterales; Rhodobacteraceae; Rhodobaca; Rhodobaca bogoriensis
1397	0	0	0	0	0	0	0	0	0	0	0	0	0	0	0	0	0	0	0	1	0	0	0	0	0	0	Bacteria; Proteobacteria; Alphaproteobacteria; Rhodobacterales; Rhodobacteraceae; Rhodovulum; Piezobacter thermophilus
1398	0	0	0	0	0	0	0	0	0	6	0	0	0	0	0	0	0	0	0	0	0	0	0	0	0	0	Bacteria; Proteobacteria; Alphaproteobacteria; Rhodobacterales; Rhodobacteraceae; Roseibacterium; Roseobacter sp. WM2
1399	0	0	0	0	0	0	0	0	0	0	0	0	0	0	0	0	0	0	0	33	0	0	0	6	31	0	Bacteria; Proteobacteria; Alphaproteobacteria; Rhodobacterales; Rhodobacteraceae; Roseobacter clade CHAB-I-5 lineage; uncultured marine bacterium
1400	0	0	0	0	0	0	0	0	0	0	0	0	0	0	1	0	0	0	0	0	0	0	0	0	0	0	Bacteria; Proteobacteria; Alphaproteobacteria; Rhodobacterales; Rhodobacteraceae; Roseobacter clade CHAB-I-5 lineage; uncultured marine bacterium
1401	0	0	0	0	0	0	0	0	5	0	0	10	39	0	0	0	0	0	0	0	0	0	0	0	4	0	Bacteria; Proteobacteria; Alphaproteobacteria; Rhodobacterales; Rhodobacteraceae; Roseobacter clade CHAB-I-5 lineage; uncultured marine bacterium
1402	0	0	0	4	5	0	0	0	0	0	0	0	0	0	0	0	0	0	7	4	0	0	0	0	15	0	Bacteria; Proteobacteria; Alphaproteobacteria; Rhodobacterales; Rhodobacteraceae; Roseobacter clade CHAB-I-5 lineage; uncultured marine bacterium
1403	0	0	0	0	0	0	0	1	0	0	0	0	0	0	0	0	0	0	0	0	0	0	0	0	0	0	Bacteria; Proteobacteria; Alphaproteobacteria; Rhodobacterales; Rhodobacteraceae; Roseobacter clade CHAB-I-5 lineage; uncultured marine bacterium
1404	0	0	0	0	0	0	0	0	0	0	0	0	0	0	0	2	0	0	0	0	0	0	0	0	0	0	Bacteria; Proteobacteria; Alphaproteobacteria; Rhodobacterales; Rhodobacteraceae; Roseobacter clade CHAB-I-5 lineage; uncultured marine bacterium
1405	0	0	0	0	4	0	0	0	0	0	0	0	0	0	0	0	0	0	0	0	0	0	0	0	0	0	Bacteria; Proteobacteria; Alphaproteobacteria; Rhodobacterales; Rhodobacteraceae; Roseobacter clade CHAB-I-5 lineage; uncultured marine bacterium
1406	0	0	0	0	0	0	0	0	0	0	0	0	0	7	0	0	0	0	0	0	0	0	0	12	0	0	Bacteria; Proteobacteria; Alphaproteobacteria; Rhodobacterales; Rhodobacteraceae; Roseobacter clade CHAB-I-5 lineage; uncultured marine bacterium
1407	0	0	0	0	0	0	0	0	0	0	0	0	0	0	0	0	0	1	0	0	0	0	0	0	0	0	Bacteria; Proteobacteria; Alphaproteobacteria; Rhodobacterales; Rhodobacteraceae; Roseobacter clade CHAB-I-5 lineage; uncultured marine bacterium
1408	0	0	0	0	0	0	0	0	0	0	0	0	0	1	0	0	0	0	0	0	0	0	0	0	0	0	Bacteria; Proteobacteria; Alphaproteobacteria; Rhodobacterales; Rhodobacteraceae; Roseobacter clade CHAB-I-5 lineage; uncultured marine bacterium
1409	0	0	0	0	0	0	0	0	0	0	0	0	0	0	0	0	0	0	1	0	0	0	0	0	0	0	Bacteria; Proteobacteria; Alphaproteobacteria; Rhodobacterales; Rhodobacteraceae; Roseobacter clade CHAB-I-5 lineage; uncultured marine bacterium
1410	0	0	0	0	0	0	0	0	0	0	0	0	0	0	0	0	0	0	0	0	0	0	1	0	0	0	Bacteria; Proteobacteria; Alphaproteobacteria; Rhodobacterales; Rhodobacteraceae; Roseobacter clade CHAB-I-5 lineage; uncultured marine bacterium
1411	0	0	0	0	3	0	0	0	0	0	0	0	0	0	0	0	0	0	0	0	0	0	0	0	0	0	Bacteria; Proteobacteria; Alphaproteobacteria; Rhodobacterales; Rhodobacteraceae; Roseobacter clade CHAB-I-5 lineage; uncultured marine bacterium
1412	0	0	0	166	0	0	0	0	0	0	0	0	0	0	8	63	236	174	62	26	37	86	1	11	5	0	Bacteria; Proteobacteria; Alphaproteobacteria; Rhodobacterales; Rhodobacteraceae; Roseobacter clade CHAB-I-5 lineage; uncultured marine bacterium
1413	0	0	0	122	0	0	0	0	0	0	9	0	0	0	0	0	0	0	0	0	0	0	0	0	0	0	Bacteria; Proteobacteria; Alphaproteobacteria; Rhodobacterales; Rhodobacteraceae; Roseobacter clade CHAB-I-5 lineage; uncultured marine bacterium
1414	0	0	1	0	0	0	0	0	0	0	0	0	0	0	0	0	0	0	0	0	0	0	0	0	0	0	Bacteria; Proteobacteria; Alphaproteobacteria; Rhodobacterales; Rhodobacteraceae; Roseobacter clade CHAB-I-5 lineage; uncultured marine bacterium
1415	0	0	0	0	0	0	0	0	0	0	0	0	0	11	0	0	0	0	0	0	0	0	0	0	0	0	Bacteria; Proteobacteria; Alphaproteobacteria; Rhodobacterales; Rhodobacteraceae; Roseobacter clade CHAB-I-5 lineage; uncultured marine bacterium
1416	0	0	0	0	0	0	0	0	0	0	0	0	0	0	0	0	0	0	6	0	0	0	0	0	0	0	Bacteria; Proteobacteria; Alphaproteobacteria; Rhodobacterales; Rhodobacteraceae; Roseobacter clade CHAB-I-5 lineage; uncultured marine bacterium
1417	905	300	673	290	1272	625	461	879	1704	1818	1039	1219	484	1576	276	1500	156	2441	5326	7049	2866	2372	1474	2939	2858	440	Bacteria; Proteobacteria; Alphaproteobacteria; Rhodobacterales; Rhodobacteraceae; Roseobacter clade CHAB-I-5 lineage; uncultured marine bacterium
1418	0	0	0	0	0	0	2	0	0	0	0	0	0	1	0	0	0	0	0	0	0	0	1	0	4	0	Bacteria; Proteobacteria; Alphaproteobacteria; Rhodobacterales; Rhodobacteraceae; Roseobacter clade CHAB-I-5 lineage; uncultured marine bacterium
1419	0	0	0	0	0	0	0	0	0	0	0	0	0	0	0	0	0	0	0	1	0	0	0	0	0	0	Bacteria; Proteobacteria; Alphaproteobacteria; Rhodobacterales; Rhodobacteraceae; Roseobacter clade CHAB-I-5 lineage; uncultured marine bacterium
1420	0	0	0	0	0	0	0	0	0	0	0	0	0	0	0	0	0	0	9	10	20	0	0	0	7	0	Bacteria; Proteobacteria; Alphaproteobacteria; Rhodobacterales; Rhodobacteraceae; Roseobacter clade CHAB-I-5 lineage; uncultured marine bacterium
1421	0	0	0	0	0	0	0	0	0	0	0	0	0	0	0	0	0	0	0	10	0	11	0	0	0	0	Bacteria; Proteobacteria; Alphaproteobacteria; Rhodobacterales; Rhodobacteraceae; Roseobacter clade CHAB-I-5 lineage; uncultured marine bacterium
1422	0	0	0	0	0	0	0	0	0	0	0	0	0	0	0	0	0	0	97	123	0	0	0	0	0	0	Bacteria; Proteobacteria; Alphaproteobacteria; Rhodobacterales; Rhodobacteraceae; Roseobacter clade CHAB-I-5 lineage; uncultured marine bacterium
1423	0	0	0	0	0	1	0	0	0	0	0	0	0	0	0	0	0	0	0	0	0	0	0	0	0	0	Bacteria; Proteobacteria; Alphaproteobacteria; Rhodobacterales; Rhodobacteraceae; Roseobacter clade CHAB-I-5 lineage; uncultured marine bacterium
1424	0	0	0	0	0	0	0	0	0	0	0	0	0	0	0	0	0	0	2	0	0	0	0	0	0	0	Bacteria; Proteobacteria; Alphaproteobacteria; Rhodobacterales; Rhodobacteraceae; Roseobacter clade CHAB-I-5 lineage; uncultured marine bacterium
1425	29	17	72	339	24	0	0	22	125	125	317	298	371	148	62	0	0	223	303	501	379	272	232	605	696	354	Bacteria; Proteobacteria; Alphaproteobacteria; Rhodobacterales; Rhodobacteraceae; Roseobacter clade NAC11-6 lineage; uncultured marine bacterium
1426	0	0	0	0	0	0	0	0	0	0	0	0	0	0	0	0	0	0	0	0	0	1	0	0	0	0	Bacteria; Proteobacteria; Alphaproteobacteria; Rhodobacterales; Rhodobacteraceae; Roseobacter clade NAC11-6 lineage; uncultured marine bacterium
1427	16	0	0	0	0	0	0	0	53	89	0	0	0	0	0	0	0	0	0	0	0	0	0	0	34	0	Bacteria; Proteobacteria; Alphaproteobacteria; Rhodobacterales; Rhodobacteraceae; Roseobacter clade NAC11-6 lineage; uncultured marine bacterium
1428	0	0	0	0	0	0	0	0	0	0	0	0	0	0	0	0	0	0	0	0	0	0	0	0	3	0	Bacteria; Proteobacteria; Alphaproteobacteria; Rhodobacterales; Rhodobacteraceae; Roseobacter clade NAC11-6 lineage; uncultured marine bacterium
1429	0	0	0	0	0	0	0	0	0	0	0	0	0	0	0	0	0	0	0	0	0	2	0	0	0	0	Bacteria; Proteobacteria; Alphaproteobacteria; Rhodobacterales; Rhodobacteraceae; Roseobacter clade NAC11-6 lineage; uncultured marine bacterium
1430	0	0	0	0	0	0	0	0	0	0	0	0	0	0	0	0	0	0	0	1	0	0	0	0	0	0	Bacteria; Proteobacteria; Alphaproteobacteria; Rhodobacterales; Rhodobacteraceae; Roseobacter clade NAC11-6 lineage; uncultured marine bacterium
1431	0	0	0	0	0	0	0	0	0	0	0	0	0	0	0	0	0	0	0	0	0	0	0	0	4	0	Bacteria; Proteobacteria; Alphaproteobacteria; Rhodobacterales; Rhodobacteraceae; Roseobacter clade NAC11-6 lineage; uncultured marine bacterium
1432	0	0	0	0	0	0	0	0	0	0	0	0	0	0	0	0	0	0	0	0	0	0	0	0	6	0	Bacteria; Proteobacteria; Alphaproteobacteria; Rhodobacterales; Rhodobacteraceae; Roseobacter clade NAC11-6 lineage; uncultured marine bacterium
1433	0	0	0	0	0	0	0	0	0	0	0	0	0	0	0	0	0	0	0	0	0	0	0	0	1	0	Bacteria; Proteobacteria; Alphaproteobacteria; Rhodobacterales; Rhodobacteraceae; Roseobacter clade NAC11-6 lineage; uncultured marine bacterium
1434	0	0	0	0	0	0	0	0	0	0	0	0	0	0	0	0	0	20	0	0	0	0	0	0	0	0	Bacteria; Proteobacteria; Alphaproteobacteria; Rhodobacterales; Rhodobacteraceae; Roseobacter clade NAC11-6 lineage; uncultured marine bacterium
1435	0	0	0	0	0	0	0	0	0	0	0	0	0	0	0	0	0	0	0	0	0	8	0	0	0	0	Bacteria; Proteobacteria; Alphaproteobacteria; Rhodobacterales; Rhodobacteraceae; Roseobacter clade NAC11-6 lineage; uncultured marine bacterium
1436	0	0	0	0	0	0	0	0	0	0	0	0	0	0	0	0	0	0	0	0	0	0	0	0	1	0	Bacteria; Proteobacteria; Alphaproteobacteria; Rhodobacterales; Rhodobacteraceae; Roseobacter clade NAC11-6 lineage; uncultured marine bacterium
1437	0	0	0	0	0	0	0	0	0	0	0	0	0	0	0	0	0	0	0	0	3	0	0	0	0	0	Bacteria; Proteobacteria; Alphaproteobacteria; Rhodobacterales; Rhodobacteraceae; Roseobacter clade NAC11-7 lineage; uncultured alpha proteobacterium
1438	0	0	0	4	0	0	0	0	0	0	0	0	0	0	0	0	0	0	0	0	0	0	0	0	0	0	Bacteria; Proteobacteria; Alphaproteobacteria; Rhodobacterales; Rhodobacteraceae; Roseobacter clade NAC11-7 lineage; uncultured alpha proteobacterium
1439	0	0	0	0	0	0	0	0	0	0	0	0	0	8	0	0	0	0	0	0	0	0	0	0	0	0	Bacteria; Proteobacteria; Alphaproteobacteria; Rhodobacterales; Rhodobacteraceae; Roseobacter clade NAC11-7 lineage; uncultured bacterium
1440	0	0	1	0	0	0	0	0	0	0	0	0	0	0	0	0	0	0	0	0	0	0	0	0	0	0	Bacteria; Proteobacteria; Alphaproteobacteria; Rhodobacterales; Rhodobacteraceae; Roseobacter clade NAC11-7 lineage; uncultured bacterium
1441	4	22	0	0	0	0	0	15	0	0	0	0	0	0	0	0	0	0	0	14	0	0	0	0	0	0	Bacteria; Proteobacteria; Alphaproteobacteria; Rhodobacterales; Rhodobacteraceae; Roseobacter clade NAC11-7 lineage; uncultured bacterium
1442	0	0	0	0	0	0	0	0	0	0	0	0	0	0	0	0	0	0	0	1	0	0	0	0	0	0	Bacteria; Proteobacteria; Alphaproteobacteria; Rhodobacterales; Rhodobacteraceae; Roseobacter clade NAC11-7 lineage; uncultured bacterium
1443	0	0	0	0	0	0	0	0	78	0	103	0	0	0	0	0	31	0	0	0	0	0	0	0	12	0	Bacteria; Proteobacteria; Alphaproteobacteria; Rhodobacterales; Rhodobacteraceae; Roseobacter clade NAC11-7 lineage; uncultured bacterium
1444	0	0	0	0	0	0	0	0	0	0	0	0	8	15	0	0	0	0	0	0	0	0	0	0	0	0	Bacteria; Proteobacteria; Alphaproteobacteria; Rhodobacterales; Rhodobacteraceae; Roseobacter clade NAC11-7 lineage; uncultured bacterium
1445	0	0	0	1	0	0	0	0	0	0	0	0	0	0	0	0	0	0	0	0	0	0	0	0	0	0	Bacteria; Proteobacteria; Alphaproteobacteria; Rhodobacterales; Rhodobacteraceae; Roseobacter clade NAC11-7 lineage; uncultured bacterium
1446	0	0	0	0	0	0	0	0	0	0	0	0	0	0	0	1	0	8	0	0	0	0	0	0	0	0	Bacteria; Proteobacteria; Alphaproteobacteria; Rhodobacterales; Rhodobacteraceae; Roseobacter clade NAC11-7 lineage; uncultured marine bacterium
1447	0	0	4	0	0	0	0	0	0	0	0	0	0	0	0	0	0	0	0	0	0	0	0	0	0	0	Bacteria; Proteobacteria; Alphaproteobacteria; Rhodobacterales; Rhodobacteraceae; Roseobacter clade NAC11-7 lineage; uncultured marine bacterium
1448	0	0	0	0	0	0	0	0	0	0	0	0	0	0	0	0	0	0	0	1	0	0	0	0	0	0	Bacteria; Proteobacteria; Alphaproteobacteria; Rhodobacterales; Rhodobacteraceae; Roseobacter clade NAC11-7 lineage; uncultured marine bacterium
1449	0	0	0	0	0	0	0	0	0	0	0	0	0	0	0	0	0	2	0	0	0	0	0	0	0	0	Bacteria; Proteobacteria; Alphaproteobacteria; Rhodobacterales; Rhodobacteraceae; Roseobacter clade NAC11-7 lineage; uncultured marine bacterium
1450	0	0	0	0	0	0	0	0	0	0	0	0	0	0	0	0	0	0	0	0	0	0	0	0	2	0	Bacteria; Proteobacteria; Alphaproteobacteria; Rhodobacterales; Rhodobacteraceae; Roseobacter clade NAC11-7 lineage; uncultured marine bacterium
1451	0	0	0	0	0	0	0	0	0	0	0	0	0	22	0	0	0	29	29	88	10	0	0	44	19	0	Bacteria; Proteobacteria; Alphaproteobacteria; Rhodobacterales; Rhodobacteraceae; Roseobacter clade NAC11-7 lineage; uncultured marine bacterium
1452	0	0	0	0	0	0	0	0	0	0	0	0	0	0	0	0	0	1	0	0	0	0	0	0	0	0	Bacteria; Proteobacteria; Alphaproteobacteria; Rhodobacterales; Rhodobacteraceae; Roseobacter clade NAC11-7 lineage; uncultured marine bacterium
1453	0	0	0	0	0	0	0	0	0	0	0	0	0	0	0	0	0	0	2	0	0	0	0	0	0	0	Bacteria; Proteobacteria; Alphaproteobacteria; Rhodobacterales; Rhodobacteraceae; Roseobacter clade NAC11-7 lineage; uncultured marine bacterium
1454	0	0	0	0	0	0	0	0	0	0	0	0	0	0	0	0	0	0	1	0	0	0	0	0	0	0	Bacteria; Proteobacteria; Alphaproteobacteria; Rhodobacterales; Rhodobacteraceae; Roseobacter clade NAC11-7 lineage; uncultured marine bacterium
1455	0	0	0	0	0	0	0	0	0	0	0	0	0	0	0	0	0	0	0	20	0	0	0	0	0	0	Bacteria; Proteobacteria; Alphaproteobacteria; Rhodobacterales; Rhodobacteraceae; Roseobacter clade NAC11-7 lineage; uncultured marine bacterium
1456	0	0	0	0	0	0	0	0	0	0	0	0	0	0	0	0	0	4	0	0	0	0	0	0	0	0	Bacteria; Proteobacteria; Alphaproteobacteria; Rhodobacterales; Rhodobacteraceae; Roseobacter clade NAC11-7 lineage; uncultured marine bacterium
1457	0	0	0	0	0	0	0	8	0	0	0	0	0	31	0	0	0	0	0	0	0	0	0	0	0	0	Bacteria; Proteobacteria; Alphaproteobacteria; Rhodobacterales; Rhodobacteraceae; Roseobacter clade NAC11-7 lineage; uncultured marine bacterium
1458	0	0	1	0	0	0	0	0	0	0	0	0	0	0	0	0	0	0	0	0	0	0	0	0	0	0	Bacteria; Proteobacteria; Alphaproteobacteria; Rhodobacterales; Rhodobacteraceae; Roseobacter clade NAC11-7 lineage; uncultured marine bacterium
1459	0	0	0	0	0	0	0	0	0	0	0	0	0	0	9	0	0	0	0	0	0	0	0	0	0	0	Bacteria; Proteobacteria; Alphaproteobacteria; Rhodobacterales; Rhodobacteraceae; Roseobacter clade NAC11-7 lineage; uncultured marine bacterium
1460	0	0	0	0	0	0	0	0	0	0	0	0	0	36	9	117	0	21	68	27	23	7	0	0	4	0	Bacteria; Proteobacteria; Alphaproteobacteria; Rhodobacterales; Rhodobacteraceae; Roseobacter clade NAC11-7 lineage; uncultured marine bacterium
1461	0	0	0	0	0	0	0	12	0	0	0	0	0	0	0	0	0	0	0	16	0	0	0	0	0	0	Bacteria; Proteobacteria; Alphaproteobacteria; Rhodobacterales; Rhodobacteraceae; Roseobacter clade NAC11-7 lineage; uncultured marine bacterium
1462	0	0	0	0	0	0	0	0	0	0	0	0	0	0	1	0	0	0	0	0	0	0	0	0	0	0	Bacteria; Proteobacteria; Alphaproteobacteria; Rhodobacterales; Rhodobacteraceae; Roseobacter clade NAC11-7 lineage; uncultured marine bacterium
1463	0	0	0	0	0	0	0	0	0	0	0	0	0	0	0	0	0	0	0	0	1	0	0	0	0	0	Bacteria; Proteobacteria; Alphaproteobacteria; Rhodobacterales; Rhodobacteraceae; Roseobacter clade NAC11-7 lineage; uncultured marine bacterium
1464	0	0	0	0	0	0	0	0	0	0	0	0	0	0	0	1	0	0	0	0	0	0	0	0	0	0	Bacteria; Proteobacteria; Alphaproteobacteria; Rhodobacterales; Rhodobacteraceae; Roseobacter clade NAC11-7 lineage; uncultured Rhodobacteraceae bacterium
1465	1	0	0	0	0	0	0	0	0	0	0	0	0	0	0	0	0	0	0	0	0	0	0	0	0	0	Bacteria; Proteobacteria; Alphaproteobacteria; Rhodobacterales; Rhodobacteraceae; Roseobacter clade NAC11-7 lineage; uncultured Rhodobacteraceae bacterium
1466	0	0	0	0	0	0	0	0	0	0	0	0	0	0	0	1	0	0	0	0	0	0	0	0	0	0	Bacteria; Proteobacteria; Alphaproteobacteria; Rhodobacterales; Rhodobacteraceae; Roseobacter clade NAC11-7 lineage; uncultured Rhodobacteraceae bacterium
1467	0	0	0	0	0	0	0	0	0	0	0	0	0	6	0	0	0	0	0	0	0	0	0	0	0	0	Bacteria; Proteobacteria; Alphaproteobacteria; Rhodobacterales; Rhodobacteraceae; Roseobacter clade NAC11-7 lineage; uncultured Roseobacter sp.
1468	0	0	0	0	0	0	0	0	0	0	0	0	0	0	10	0	0	0	0	0	0	0	0	0	0	0	Bacteria; Proteobacteria; Alphaproteobacteria; Rhodobacterales; Rhodobacteraceae; Roseobacter; uncultured bacterium
1469	0	0	0	0	0	0	0	0	0	0	0	0	0	0	0	0	0	2	0	0	0	0	0	0	0	0	Bacteria; Proteobacteria; Alphaproteobacteria; Rhodobacterales; Rhodobacteraceae; Roseobacter; uncultured bacterium
1470	0	0	0	0	0	0	0	37	0	0	0	0	0	38	0	0	0	0	0	0	36	0	0	0	0	0	Bacteria; Proteobacteria; Alphaproteobacteria; Rhodobacterales; Rhodobacteraceae; Roseobacter; uncultured bacterium
1471	0	0	0	0	0	0	0	0	0	0	0	0	0	0	0	0	0	0	0	1	0	0	0	0	0	0	Bacteria; Proteobacteria; Alphaproteobacteria; Rhodobacterales; Rhodobacteraceae; Roseobacter; uncultured bacterium
1472	0	0	0	0	0	0	0	0	0	0	0	0	0	0	0	0	0	0	0	0	0	0	0	1	0	0	Bacteria; Proteobacteria; Alphaproteobacteria; Rhodobacterales; Rhodobacteraceae; Roseobacter; uncultured bacterium
1473	0	0	0	0	0	0	0	0	0	0	0	0	0	59	0	0	0	0	0	0	0	0	0	0	0	7	Bacteria; Proteobacteria; Alphaproteobacteria; Rhodobacterales; Rhodobacteraceae; Roseobacter; uncultured bacterium
1474	0	0	0	0	22	0	0	0	0	0	0	0	0	0	0	0	0	0	0	0	0	0	0	0	0	0	Bacteria; Proteobacteria; Alphaproteobacteria; Rhodobacterales; Rhodobacteraceae; Roseobacter; uncultured Sulfitobacter sp.
1475	0	0	0	0	0	0	0	0	0	0	0	0	0	0	0	1	0	0	0	0	0	0	0	0	0	0	Bacteria; Proteobacteria; Alphaproteobacteria; Rhodobacterales; Rhodobacteraceae; Roseovarius; Roseovarius crassostreae
1476	0	0	0	0	0	0	0	0	0	0	0	0	0	0	0	0	0	0	0	0	0	0	0	1	0	0	Bacteria; Proteobacteria; Alphaproteobacteria; Rhodobacterales; Rhodobacteraceae; Roseovarius; uncultured alpha proteobacterium
1477	0	0	0	0	0	0	0	0	0	0	0	0	0	1	0	0	0	0	0	0	0	0	0	0	0	0	Bacteria; Proteobacteria; Alphaproteobacteria; Rhodobacterales; Rhodobacteraceae; Roseovarius; uncultured alpha proteobacterium
1478	0	0	0	0	0	0	0	0	0	0	0	0	0	0	0	0	0	0	2	0	0	0	0	0	0	0	Bacteria; Proteobacteria; Alphaproteobacteria; Rhodobacterales; Rhodobacteraceae; Roseovarius; uncultured alpha proteobacterium
1479	0	0	0	0	0	0	0	0	0	0	0	0	0	0	0	0	0	0	0	0	0	0	0	0	3	0	Bacteria; Proteobacteria; Alphaproteobacteria; Rhodobacterales; Rhodobacteraceae; Roseovarius; uncultured bacterium
1480	0	0	0	0	0	0	0	0	0	0	0	0	0	0	0	4	0	0	0	0	0	0	0	0	0	0	Bacteria; Proteobacteria; Alphaproteobacteria; Rhodobacterales; Rhodobacteraceae; Roseovarius; uncultured bacterium
1481	0	0	0	0	0	0	0	0	0	0	0	0	0	0	0	0	0	0	0	0	1	0	0	0	0	0	Bacteria; Proteobacteria; Alphaproteobacteria; Rhodobacterales; Rhodobacteraceae; Roseovarius; uncultured bacterium
1482	0	0	0	0	0	0	0	0	0	0	0	0	0	0	0	0	0	0	0	0	0	0	1	0	0	0	Bacteria; Proteobacteria; Alphaproteobacteria; Rhodobacterales; Rhodobacteraceae; Roseovarius; uncultured bacterium
1483	0	0	0	0	0	0	0	0	0	0	0	0	0	1	0	0	0	0	0	0	0	0	0	0	0	0	Bacteria; Proteobacteria; Alphaproteobacteria; Rhodobacterales; Rhodobacteraceae; Rubellimicrobium; uncultured bacterium
1484	0	0	0	0	0	0	0	10	0	0	0	0	0	7	0	16	0	0	23	92	38	0	0	71	0	0	Bacteria; Proteobacteria; Alphaproteobacteria; Rhodobacterales; Rhodobacteraceae; Ruegeria; uncultured bacterium
1485	0	0	0	0	0	0	0	0	0	0	0	0	0	0	0	0	0	0	0	1	0	0	0	0	0	0	Bacteria; Proteobacteria; Alphaproteobacteria; Rhodobacterales; Rhodobacteraceae; Salinihabitans; Roseivivax sp. kmb32
1486	0	0	0	1	0	0	0	0	0	0	0	0	0	0	0	0	0	0	0	0	0	0	0	0	0	0	Bacteria; Proteobacteria; Alphaproteobacteria; Rhodobacterales; Rhodobacteraceae; Sediminimonas; uncultured bacterium
1487	0	0	0	0	0	0	0	0	0	0	0	0	0	0	0	0	0	0	0	0	0	2	0	0	0	0	Bacteria; Proteobacteria; Alphaproteobacteria; Rhodobacterales; Rhodobacteraceae; Shimia; Shimia sp. CC-AMW-C
1488	0	0	3	0	0	0	0	0	0	0	0	0	0	0	0	0	0	0	0	0	0	0	0	0	0	0	Bacteria; Proteobacteria; Alphaproteobacteria; Rhodobacterales; Rhodobacteraceae; Shimia; unidentified marine bacterioplankton
1489	0	0	1	0	0	0	0	0	0	0	0	0	0	0	0	0	0	0	0	0	0	0	0	0	0	0	Bacteria; Proteobacteria; Alphaproteobacteria; Rhodobacterales; Rhodobacteraceae; Sulfitobacter; uncultured bacterium
1490	0	0	0	0	0	0	0	0	0	0	0	0	0	0	0	1	0	0	0	0	0	0	0	0	0	0	Bacteria; Proteobacteria; Alphaproteobacteria; Rhodobacterales; Rhodobacteraceae; Sulfitobacter; uncultured bacterium
1491	0	0	3	0	0	0	0	0	0	0	0	0	0	0	0	0	0	0	0	0	0	0	0	0	0	0	Bacteria; Proteobacteria; Alphaproteobacteria; Rhodobacterales; Rhodobacteraceae; Sulfitobacter; uncultured bacterium
1492	0	0	1	0	0	0	0	0	0	0	0	0	0	0	0	0	0	0	0	0	0	0	0	0	0	0	Bacteria; Proteobacteria; Alphaproteobacteria; Rhodobacterales; Rhodobacteraceae; Sulfitobacter; uncultured bacterium
1493	0	0	1	0	0	0	0	0	0	0	0	0	0	0	0	0	0	0	0	0	0	0	0	0	0	0	Bacteria; Proteobacteria; Alphaproteobacteria; Rhodobacterales; Rhodobacteraceae; Sulfitobacter; uncultured bacterium
1494	0	0	0	0	0	0	0	0	0	0	0	0	0	7	0	0	0	0	0	0	0	0	0	0	0	0	Bacteria; Proteobacteria; Alphaproteobacteria; Rhodobacterales; Rhodobacteraceae; Sulfitobacter; uncultured marine bacterium
1495	0	0	0	0	0	0	0	0	0	0	0	0	0	6	0	0	0	0	0	0	0	0	0	0	0	0	Bacteria; Proteobacteria; Alphaproteobacteria; Rhodobacterales; Rhodobacteraceae; Sulfitobacter; uncultured marine bacterium
1496	0	0	0	1	0	0	0	0	0	0	0	0	0	0	0	0	0	0	0	0	0	0	0	0	0	0	Bacteria; Proteobacteria; Alphaproteobacteria; Rhodobacterales; Rhodobacteraceae; Sulfitobacter; uncultured marine bacterium
1497	2767	3900	5276	804	451	1617	816	2435	192	287	222	428	760	2155	340	2484	274	188	2046	3248	2099	107	82	139	201	125	Bacteria; Proteobacteria; Alphaproteobacteria; Rhodobacterales; Rhodobacteraceae; Sulfitobacter; uncultured Rhodobacteraceae bacterium
1498	0	4	0	0	0	0	0	2	0	0	0	0	0	0	0	0	0	0	0	0	0	0	0	0	0	0	Bacteria; Proteobacteria; Alphaproteobacteria; Rhodobacterales; Rhodobacteraceae; Tateyamaria; bacterium RCC 1888
1499	0	0	0	0	0	0	0	0	0	0	0	0	0	0	0	0	0	1	0	0	0	0	0	0	0	0	Bacteria; Proteobacteria; Alphaproteobacteria; Rhodobacterales; Rhodobacteraceae; Tateyamaria; uncultured alpha proteobacterium
1500	0	0	0	0	0	0	14	0	0	0	0	0	5	0	0	0	0	0	0	0	0	22	0	0	8	0	Bacteria; Proteobacteria; Alphaproteobacteria; Rhodobacterales; Rhodobacteraceae; Tateyamaria; uncultured alpha proteobacterium
1501	0	0	0	0	0	3	0	0	0	0	0	0	0	0	0	0	0	0	0	0	2	0	0	0	0	0	Bacteria; Proteobacteria; Alphaproteobacteria; Rhodobacterales; Rhodobacteraceae; Tateyamaria; uncultured bacterium
1502	0	0	0	0	0	0	0	0	0	0	0	0	0	0	0	3	0	0	0	0	0	0	0	0	0	0	Bacteria; Proteobacteria; Alphaproteobacteria; Rhodobacterales; Rhodobacteraceae; Tateyamaria; uncultured marine bacterium
1503	0	0	0	0	0	0	0	0	0	0	0	2	0	0	0	0	0	0	0	0	0	0	0	0	0	0	Bacteria; Proteobacteria; Alphaproteobacteria; Rhodobacterales; Rhodobacteraceae; Tateyamaria; uncultured marine bacterium
1504	0	26	59	16	105	124	55	122	75	48	27	96	7	0	20	112	24	5	60	45	7	23	0	7	45	0	Bacteria; Proteobacteria; Alphaproteobacteria; Rhodobacterales; Rhodobacteraceae; Tateyamaria; uncultured marine bacterium
1505	0	0	0	0	0	0	0	0	0	0	0	0	0	0	0	0	0	0	0	0	5	0	0	0	0	0	Bacteria; Proteobacteria; Alphaproteobacteria; Rhodobacterales; Rhodobacteraceae; Thalassobius; uncultured bacterium
1506	0	0	0	0	0	0	0	0	0	0	0	0	0	0	0	0	0	8	0	0	0	0	0	0	0	0	Bacteria; Proteobacteria; Alphaproteobacteria; Rhodobacterales; Rhodobacteraceae; Thalassobius; uncultured bacterium
1507	0	0	0	0	0	0	0	0	0	0	0	0	0	0	0	0	0	0	0	0	0	11	0	0	0	1	Bacteria; Proteobacteria; Alphaproteobacteria; Rhodobacterales; Rhodobacteraceae; Thalassococcus; uncultured bacterium
1508	0	0	0	0	0	0	0	0	0	0	0	0	0	0	0	0	0	13	0	0	0	19	0	0	0	0	Bacteria; Proteobacteria; Alphaproteobacteria; Rhodobacterales; Rhodobacteraceae; Tropicibacter; uncultured bacterium
1509	0	0	0	0	0	0	0	0	0	0	0	0	0	0	4	0	0	0	0	0	0	0	0	0	0	0	Bacteria; Proteobacteria; Alphaproteobacteria; Rhodobacterales; Rhodobacteraceae; uncultured; Thalassobacter sp. KJF4-8
1510	0	0	0	0	0	0	0	0	0	0	0	0	0	4	0	0	0	0	0	0	0	0	0	0	0	0	Bacteria; Proteobacteria; Alphaproteobacteria; Rhodobacterales; Rhodobacteraceae; uncultured; uncultured alpha proteobacterium
1511	0	0	0	0	0	0	0	0	0	0	0	0	0	0	0	0	0	0	0	0	0	0	0	0	1	0	Bacteria; Proteobacteria; Alphaproteobacteria; Rhodobacterales; Rhodobacteraceae; uncultured; uncultured alpha proteobacterium
1512	0	0	0	0	0	0	0	0	0	0	0	0	0	4	0	0	0	0	0	0	0	0	0	0	0	0	Bacteria; Proteobacteria; Alphaproteobacteria; Rhodobacterales; Rhodobacteraceae; uncultured; uncultured alpha proteobacterium
1513	0	0	0	0	0	0	0	0	0	0	0	0	0	0	0	0	0	0	0	0	0	6	0	0	0	0	Bacteria; Proteobacteria; Alphaproteobacteria; Rhodobacterales; Rhodobacteraceae; uncultured; uncultured alpha proteobacterium
1514	0	0	0	0	0	0	0	0	0	0	0	0	0	0	0	0	0	0	0	0	0	0	0	0	0	1	Bacteria; Proteobacteria; Alphaproteobacteria; Rhodobacterales; Rhodobacteraceae; uncultured; uncultured alpha proteobacterium
1515	0	0	0	0	0	0	0	0	0	0	0	0	0	0	0	0	0	0	0	0	0	0	1	0	0	0	Bacteria; Proteobacteria; Alphaproteobacteria; Rhodobacterales; Rhodobacteraceae; uncultured; uncultured bacterium
1516	0	0	0	0	0	0	0	0	0	0	0	0	0	8	0	0	0	0	0	0	0	0	0	0	0	0	Bacteria; Proteobacteria; Alphaproteobacteria; Rhodobacterales; Rhodobacteraceae; uncultured; uncultured bacterium
1517	0	0	0	0	0	0	0	0	0	0	0	0	0	0	0	0	0	0	0	0	0	0	0	0	1	0	Bacteria; Proteobacteria; Alphaproteobacteria; Rhodobacterales; Rhodobacteraceae; uncultured; uncultured bacterium
1518	0	0	0	1	0	0	0	0	0	0	0	0	0	0	0	0	0	0	0	0	0	0	0	0	0	0	Bacteria; Proteobacteria; Alphaproteobacteria; Rhodobacterales; Rhodobacteraceae; uncultured; uncultured bacterium
1519	0	0	0	0	0	0	0	0	0	0	0	0	0	0	0	0	0	0	0	39	0	0	0	0	0	0	Bacteria; Proteobacteria; Alphaproteobacteria; Rhodobacterales; Rhodobacteraceae; uncultured; uncultured bacterium
1520	0	0	0	1	0	0	0	0	0	0	0	0	0	1	0	0	0	0	0	0	0	0	0	0	0	0	Bacteria; Proteobacteria; Alphaproteobacteria; Rhodobacterales; Rhodobacteraceae; uncultured; uncultured bacterium
1521	0	0	0	0	0	0	0	0	0	0	0	0	0	0	0	0	0	0	0	0	1	0	0	0	0	0	Bacteria; Proteobacteria; Alphaproteobacteria; Rhodobacterales; Rhodobacteraceae; uncultured; uncultured bacterium
1522	0	0	0	0	0	0	0	0	0	0	0	0	0	0	0	0	0	0	0	0	0	0	0	1	0	0	Bacteria; Proteobacteria; Alphaproteobacteria; Rhodobacterales; Rhodobacteraceae; uncultured; uncultured bacterium
1523	0	0	0	0	0	0	0	0	0	0	0	0	0	0	0	0	0	0	0	0	0	0	0	0	0	1	Bacteria; Proteobacteria; Alphaproteobacteria; Rhodobacterales; Rhodobacteraceae; uncultured; uncultured bacterium
1524	0	0	0	0	0	0	0	0	0	0	0	0	0	0	1	0	0	0	0	0	0	0	0	0	0	0	Bacteria; Proteobacteria; Alphaproteobacteria; Rhodobacterales; Rhodobacteraceae; uncultured; uncultured bacterium
1525	0	0	0	83	0	0	0	0	3	0	8	3	81	0	0	0	0	0	0	0	0	6	0	0	0	0	Bacteria; Proteobacteria; Alphaproteobacteria; Rhodobacterales; Rhodobacteraceae; uncultured; uncultured bacterium
1526	0	0	0	0	0	0	0	0	0	0	0	0	0	0	0	0	0	0	0	0	5	0	0	0	0	0	Bacteria; Proteobacteria; Alphaproteobacteria; Rhodobacterales; Rhodobacteraceae; uncultured; uncultured bacterium
1527	0	0	0	0	0	0	0	0	0	0	0	0	0	0	0	0	0	1	0	0	0	0	0	0	0	0	Bacteria; Proteobacteria; Alphaproteobacteria; Rhodobacterales; Rhodobacteraceae; uncultured; uncultured bacterium
1528	0	0	0	0	0	0	0	0	0	0	0	0	0	0	1	0	0	0	0	0	0	0	0	0	0	0	Bacteria; Proteobacteria; Alphaproteobacteria; Rhodobacterales; Rhodobacteraceae; uncultured; uncultured bacterium
1529	0	0	0	29	0	1	0	0	0	0	2	0	29	0	0	0	0	0	0	0	0	0	0	0	0	33	Bacteria; Proteobacteria; Alphaproteobacteria; Rhodobacterales; Rhodobacteraceae; uncultured; uncultured bacterium
1530	0	0	0	0	0	0	0	0	0	0	0	0	0	0	0	0	0	0	0	0	0	0	0	13	0	0	Bacteria; Proteobacteria; Alphaproteobacteria; Rhodobacterales; Rhodobacteraceae; uncultured; uncultured bacterium
1531	0	0	0	0	0	0	0	0	0	0	0	0	0	7	0	0	0	0	0	0	0	0	0	0	0	0	Bacteria; Proteobacteria; Alphaproteobacteria; Rhodobacterales; Rhodobacteraceae; uncultured; uncultured bacterium
1532	0	0	0	0	0	0	0	0	0	0	0	0	0	0	0	0	0	0	0	0	0	0	0	1	0	0	Bacteria; Proteobacteria; Alphaproteobacteria; Rhodobacterales; Rhodobacteraceae; uncultured; uncultured bacterium
1533	0	0	0	0	0	0	0	0	0	0	0	0	0	0	0	0	0	0	0	0	1	0	0	0	0	0	Bacteria; Proteobacteria; Alphaproteobacteria; Rhodobacterales; Rhodobacteraceae; uncultured; uncultured bacterium
1534	0	0	0	0	0	0	0	0	0	0	0	0	0	0	0	0	0	0	0	0	0	0	0	0	0	1	Bacteria; Proteobacteria; Alphaproteobacteria; Rhodobacterales; Rhodobacteraceae; uncultured; uncultured bacterium
1535	0	0	0	0	0	0	0	0	0	0	0	0	0	0	0	0	0	1	0	0	0	0	0	0	0	0	Bacteria; Proteobacteria; Alphaproteobacteria; Rhodobacterales; Rhodobacteraceae; uncultured; uncultured bacterium
1536	0	0	0	0	0	0	0	0	0	0	0	0	0	0	0	0	0	0	0	1	0	0	0	0	0	0	Bacteria; Proteobacteria; Alphaproteobacteria; Rhodobacterales; Rhodobacteraceae; uncultured; uncultured bacterium
1537	0	0	0	0	0	0	0	0	0	0	0	0	0	0	13	0	0	0	0	0	0	0	0	0	0	0	Bacteria; Proteobacteria; Alphaproteobacteria; Rhodobacterales; Rhodobacteraceae; uncultured; uncultured bacterium
1538	0	0	0	0	0	0	0	4	0	0	0	2	0	0	0	0	0	0	0	0	0	0	0	0	0	0	Bacteria; Proteobacteria; Alphaproteobacteria; Rhodobacterales; Rhodobacteraceae; uncultured; uncultured bacterium
1539	0	0	0	0	0	0	0	0	0	0	0	0	0	0	0	0	0	0	1	0	0	0	0	0	0	0	Bacteria; Proteobacteria; Alphaproteobacteria; Rhodobacterales; Rhodobacteraceae; uncultured; uncultured bacterium
1540	0	0	0	0	0	0	0	0	0	0	0	0	0	0	0	0	0	0	0	0	0	0	0	0	9	0	Bacteria; Proteobacteria; Alphaproteobacteria; Rhodobacterales; Rhodobacteraceae; uncultured; uncultured bacterium
1541	0	0	0	0	0	0	0	1	0	0	0	0	0	0	0	0	0	0	0	0	0	0	0	0	0	0	Bacteria; Proteobacteria; Alphaproteobacteria; Rhodobacterales; Rhodobacteraceae; uncultured; uncultured bacterium
1542	0	0	0	0	0	0	0	0	0	0	0	0	0	0	0	0	0	0	0	12	0	65	0	0	0	1	Bacteria; Proteobacteria; Alphaproteobacteria; Rhodobacterales; Rhodobacteraceae; uncultured; uncultured bacterium
1543	0	0	0	0	0	0	0	0	0	0	0	0	0	0	0	0	0	0	0	0	0	0	0	0	0	1	Bacteria; Proteobacteria; Alphaproteobacteria; Rhodobacterales; Rhodobacteraceae; uncultured; uncultured bacterium
1544	0	0	0	0	0	0	0	0	0	0	0	0	0	0	0	0	0	0	0	0	0	0	0	0	1	0	Bacteria; Proteobacteria; Alphaproteobacteria; Rhodobacterales; Rhodobacteraceae; uncultured; uncultured bacterium
1545	0	0	0	0	0	0	0	0	0	0	0	0	0	0	0	0	0	0	0	0	0	0	1	0	0	0	Bacteria; Proteobacteria; Alphaproteobacteria; Rhodobacterales; Rhodobacteraceae; uncultured; uncultured bacterium
1546	0	0	0	0	0	0	0	0	0	0	0	0	0	0	0	0	0	0	0	0	0	0	0	0	1	0	Bacteria; Proteobacteria; Alphaproteobacteria; Rhodobacterales; Rhodobacteraceae; uncultured; uncultured bacterium
1547	0	0	0	72	17	5	0	0	22	11	68	30	66	0	0	0	0	28	49	13	0	22	21	129	78	43	Bacteria; Proteobacteria; Alphaproteobacteria; Rhodobacterales; Rhodobacteraceae; uncultured; uncultured bacterium
1548	0	0	0	0	0	0	0	0	0	0	0	0	0	0	0	0	0	0	0	0	0	5	0	0	0	0	Bacteria; Proteobacteria; Alphaproteobacteria; Rhodobacterales; Rhodobacteraceae; uncultured; uncultured bacterium
1549	0	0	0	0	0	0	0	6	0	0	0	0	0	0	0	32	0	16	0	39	25	29	0	0	12	0	Bacteria; Proteobacteria; Alphaproteobacteria; Rhodobacterales; Rhodobacteraceae; uncultured; uncultured bacterium
1550	0	0	0	0	0	0	0	0	0	0	0	0	0	0	0	0	0	0	0	0	0	0	0	0	0	1	Bacteria; Proteobacteria; Alphaproteobacteria; Rhodobacterales; Rhodobacteraceae; uncultured; uncultured bacterium
1551	0	0	0	0	0	0	0	0	0	0	0	0	1	0	0	0	0	0	0	0	0	0	0	0	0	0	Bacteria; Proteobacteria; Alphaproteobacteria; Rhodobacterales; Rhodobacteraceae; uncultured; uncultured bacterium
1552	0	0	0	0	0	0	0	0	0	0	0	0	0	0	0	0	0	1	0	0	0	0	0	0	0	0	Bacteria; Proteobacteria; Alphaproteobacteria; Rhodobacterales; Rhodobacteraceae; uncultured; uncultured bacterium
1553	0	0	1	0	0	0	0	0	0	0	0	0	0	0	0	0	0	0	0	0	0	0	0	0	0	0	Bacteria; Proteobacteria; Alphaproteobacteria; Rhodobacterales; Rhodobacteraceae; uncultured; uncultured bacterium
1554	0	0	0	0	0	0	0	0	0	0	0	0	0	0	0	0	0	0	0	0	0	0	0	0	0	1	Bacteria; Proteobacteria; Alphaproteobacteria; Rhodobacterales; Rhodobacteraceae; uncultured; uncultured bacterium
1555	0	0	0	0	0	0	0	0	0	0	0	0	0	0	0	0	0	0	0	0	0	0	0	0	1	0	Bacteria; Proteobacteria; Alphaproteobacteria; Rhodobacterales; Rhodobacteraceae; uncultured; uncultured bacterium
1556	0	0	0	0	2	0	0	0	0	0	0	0	0	0	0	0	0	0	0	0	0	0	0	0	22	0	Bacteria; Proteobacteria; Alphaproteobacteria; Rhodobacterales; Rhodobacteraceae; uncultured; uncultured bacterium
1557	0	0	0	85	14	0	0	0	0	0	25	4	101	0	0	0	0	29	0	11	0	0	0	0	12	0	Bacteria; Proteobacteria; Alphaproteobacteria; Rhodobacterales; Rhodobacteraceae; uncultured; uncultured bacterium
1558	0	0	0	0	0	0	0	0	0	0	0	0	0	0	0	0	0	0	0	0	0	0	0	0	0	1	Bacteria; Proteobacteria; Alphaproteobacteria; Rhodobacterales; Rhodobacteraceae; uncultured; uncultured bacterium
1559	0	0	0	0	0	0	0	0	0	0	0	0	0	0	0	0	0	6	0	0	0	0	0	0	0	0	Bacteria; Proteobacteria; Alphaproteobacteria; Rhodobacterales; Rhodobacteraceae; uncultured; uncultured bacterium
1560	0	0	0	0	0	0	0	0	0	0	0	0	0	0	0	0	0	0	0	0	1	0	0	0	0	0	Bacteria; Proteobacteria; Alphaproteobacteria; Rhodobacterales; Rhodobacteraceae; uncultured; uncultured bacterium
1561	0	0	0	0	0	0	0	0	0	14	0	0	0	26	0	0	0	0	0	0	0	0	0	0	10	0	Bacteria; Proteobacteria; Alphaproteobacteria; Rhodobacterales; Rhodobacteraceae; uncultured; uncultured bacterium
1562	0	0	0	0	0	0	0	0	0	0	0	0	0	36	0	0	0	0	0	0	0	20	0	0	0	15	Bacteria; Proteobacteria; Alphaproteobacteria; Rhodobacterales; Rhodobacteraceae; uncultured; uncultured bacterium
1563	0	0	0	0	0	0	0	0	0	0	0	0	0	0	0	0	0	0	0	0	0	0	0	0	0	1	Bacteria; Proteobacteria; Alphaproteobacteria; Rhodobacterales; Rhodobacteraceae; uncultured; uncultured bacterium
1564	0	0	0	0	0	0	0	0	0	0	0	0	0	0	0	0	0	0	0	15	0	0	0	0	0	0	Bacteria; Proteobacteria; Alphaproteobacteria; Rhodobacterales; Rhodobacteraceae; uncultured; uncultured bacterium
1565	0	0	0	0	0	0	0	0	0	0	0	0	0	5	0	0	0	12	0	0	0	0	0	0	0	0	Bacteria; Proteobacteria; Alphaproteobacteria; Rhodobacterales; Rhodobacteraceae; uncultured; uncultured bacterium
1566	0	0	0	0	0	0	0	0	0	0	0	0	0	0	0	0	0	0	1	0	0	0	0	0	0	0	Bacteria; Proteobacteria; Alphaproteobacteria; Rhodobacterales; Rhodobacteraceae; uncultured; uncultured bacterium
1567	0	0	0	0	0	0	0	0	0	0	0	0	0	0	0	0	0	0	0	1	0	0	0	0	0	0	Bacteria; Proteobacteria; Alphaproteobacteria; Rhodobacterales; Rhodobacteraceae; uncultured; uncultured bacterium
1568	0	0	0	0	0	0	0	0	0	0	0	0	0	0	0	0	0	0	0	0	0	0	1	0	0	0	Bacteria; Proteobacteria; Alphaproteobacteria; Rhodobacterales; Rhodobacteraceae; uncultured; uncultured bacterium
1569	0	0	0	0	0	0	0	0	0	0	0	0	0	0	0	0	0	0	0	1	0	0	0	0	0	0	Bacteria; Proteobacteria; Alphaproteobacteria; Rhodobacterales; Rhodobacteraceae; uncultured; uncultured marine bacterium
1570	0	0	0	0	0	0	0	0	0	0	0	0	0	0	0	0	0	0	13	0	0	0	0	0	0	0	Bacteria; Proteobacteria; Alphaproteobacteria; Rhodobacterales; Rhodobacteraceae; uncultured; uncultured marine bacterium
1571	0	0	0	0	0	0	0	0	0	0	0	0	0	0	0	0	0	1	0	0	0	0	0	0	0	0	Bacteria; Proteobacteria; Alphaproteobacteria; Rhodobacterales; Rhodobacteraceae; uncultured; uncultured marine bacterium
1572	0	0	0	0	0	0	0	0	0	0	0	0	0	0	0	0	0	0	0	0	0	0	0	1	0	0	Bacteria; Proteobacteria; Alphaproteobacteria; Rhodobacterales; Rhodobacteraceae; uncultured; uncultured marine bacterium
1573	0	0	0	0	0	0	0	0	0	0	0	0	0	0	0	0	0	0	1	0	0	0	0	0	0	0	Bacteria; Proteobacteria; Alphaproteobacteria; Rhodobacterales; Rhodobacteraceae; uncultured; uncultured marine bacterium
1574	0	0	0	0	0	0	0	0	0	0	0	0	0	0	0	0	0	0	0	0	0	0	0	0	0	1	Bacteria; Proteobacteria; Alphaproteobacteria; Rhodobacterales; Rhodobacteraceae; uncultured; uncultured marine bacterium
1575	0	0	0	0	0	0	0	9	0	0	0	0	0	0	0	0	0	0	0	0	0	0	0	0	3	0	Bacteria; Proteobacteria; Alphaproteobacteria; Rhodobacterales; Rhodobacteraceae; uncultured; uncultured marine bacterium
1576	0	0	0	0	0	0	0	0	0	0	0	0	0	0	0	0	0	1	0	0	0	0	0	0	0	0	Bacteria; Proteobacteria; Alphaproteobacteria; Rhodobacterales; Rhodobacteraceae; uncultured; uncultured marine bacterium
1577	0	0	0	0	0	0	0	0	0	0	0	0	0	0	0	0	0	0	0	0	0	0	0	0	6	0	Bacteria; Proteobacteria; Alphaproteobacteria; Rhodobacterales; Rhodobacteraceae; uncultured; uncultured marine bacterium
1578	0	0	0	0	0	0	0	0	0	0	0	0	0	0	0	1	0	0	0	0	0	0	0	0	0	0	Bacteria; Proteobacteria; Alphaproteobacteria; Rhodobacterales; Rhodobacteraceae; uncultured; uncultured marine bacterium
1579	0	0	0	0	0	0	0	0	0	0	0	0	0	0	0	1	0	0	0	0	0	0	0	0	0	0	Bacteria; Proteobacteria; Alphaproteobacteria; Rhodobacterales; Rhodobacteraceae; uncultured; uncultured marine bacterium
1580	0	0	0	0	0	0	0	0	0	0	0	0	0	0	0	0	0	0	0	9	0	0	0	0	0	0	Bacteria; Proteobacteria; Alphaproteobacteria; Rhodobacterales; Rhodobacteraceae; uncultured; uncultured marine bacterium
1581	0	0	0	0	0	0	0	0	0	0	0	0	0	0	0	0	0	0	1	0	0	0	0	0	0	0	Bacteria; Proteobacteria; Alphaproteobacteria; Rhodobacterales; Rhodobacteraceae; uncultured; uncultured marine bacterium
1582	0	0	0	0	0	0	0	0	0	0	0	0	0	0	0	0	0	0	43	28	0	0	0	0	0	0	Bacteria; Proteobacteria; Alphaproteobacteria; Rhodobacterales; Rhodobacteraceae; uncultured; uncultured marine bacterium
1583	0	0	0	0	0	0	0	0	0	0	0	0	0	0	1	0	0	0	0	0	0	0	0	0	0	0	Bacteria; Proteobacteria; Alphaproteobacteria; Rhodobacterales; Rhodobacteraceae; uncultured; uncultured marine bacterium
1584	0	0	0	0	0	0	0	0	0	0	0	0	0	0	0	0	0	0	0	0	0	41	0	7	0	1	Bacteria; Proteobacteria; Alphaproteobacteria; Rhodobacterales; Rhodobacteraceae; uncultured; uncultured marine bacterium
1585	0	0	0	0	0	0	0	0	0	0	0	0	0	0	0	0	0	0	0	1	0	0	0	0	0	0	Bacteria; Proteobacteria; Alphaproteobacteria; Rhodobacterales; Rhodobacteraceae; uncultured; uncultured marine bacterium
1586	0	0	0	0	0	0	0	0	0	0	0	0	0	0	0	0	0	0	0	0	0	0	0	1	0	0	Bacteria; Proteobacteria; Alphaproteobacteria; Rhodobacterales; Rhodobacteraceae; uncultured; uncultured marine bacterium
1587	0	0	0	0	0	0	0	0	0	0	0	0	0	0	0	0	0	0	1	0	0	0	0	0	0	0	Bacteria; Proteobacteria; Alphaproteobacteria; Rhodobacterales; Rhodobacteraceae; uncultured; uncultured marine bacterium
1588	0	0	0	0	0	0	0	0	0	0	0	0	0	0	0	0	0	46	0	0	0	0	0	0	17	0	Bacteria; Proteobacteria; Alphaproteobacteria; Rhodobacterales; Rhodobacteraceae; uncultured; uncultured marine bacterium
1589	0	0	0	0	8	0	0	0	0	0	0	0	0	61	0	0	0	0	0	0	0	0	0	0	0	0	Bacteria; Proteobacteria; Alphaproteobacteria; Rhodobacterales; Rhodobacteraceae; uncultured; uncultured marine bacterium
1590	0	0	0	0	0	0	0	0	0	0	0	0	0	0	0	0	0	0	0	0	0	0	0	0	1	0	Bacteria; Proteobacteria; Alphaproteobacteria; Rhodobacterales; Rhodobacteraceae; uncultured; uncultured marine bacterium
1591	0	0	0	0	0	0	0	0	0	0	0	0	0	0	0	0	0	0	0	15	0	0	0	0	0	0	Bacteria; Proteobacteria; Alphaproteobacteria; Rhodobacterales; Rhodobacteraceae; uncultured; uncultured marine bacterium
1592	0	0	0	0	0	0	0	0	0	0	0	0	0	0	0	0	0	0	0	0	0	0	0	0	17	0	Bacteria; Proteobacteria; Alphaproteobacteria; Rhodobacterales; Rhodobacteraceae; uncultured; uncultured marine bacterium
1593	0	0	0	0	0	0	0	0	0	0	0	2	0	0	0	0	0	0	0	0	0	0	0	0	0	0	Bacteria; Proteobacteria; Alphaproteobacteria; Rhodobacterales; Rhodobacteraceae; uncultured; uncultured marine bacterium
1594	0	0	0	0	0	0	0	0	0	0	0	0	0	0	0	0	0	0	0	0	0	0	0	0	1	0	Bacteria; Proteobacteria; Alphaproteobacteria; Rhodobacterales; Rhodobacteraceae; uncultured; uncultured marine bacterium
1595	0	0	0	0	0	0	0	0	0	0	0	0	0	0	0	0	0	0	0	0	0	3	0	0	0	0	Bacteria; Proteobacteria; Alphaproteobacteria; Rhodobacterales; Rhodobacteraceae; uncultured; uncultured marine bacterium
1596	0	0	0	0	0	0	0	0	0	0	0	0	0	0	0	0	0	0	0	1	0	0	0	0	0	0	Bacteria; Proteobacteria; Alphaproteobacteria; Rhodobacterales; Rhodobacteraceae; uncultured; uncultured marine bacterium
1597	0	0	0	0	0	0	0	0	16	55	0	0	0	0	0	0	0	0	19	0	0	17	115	0	0	0	Bacteria; Proteobacteria; Alphaproteobacteria; Rhodobacterales; Rhodobacteraceae; uncultured; uncultured marine bacterium
1598	0	0	0	0	0	0	0	0	0	0	0	0	0	0	0	0	0	0	1	0	0	0	0	0	0	0	Bacteria; Proteobacteria; Alphaproteobacteria; Rhodobacterales; Rhodobacteraceae; uncultured; uncultured Rhodobacteraceae bacterium
1599	0	0	0	0	0	0	0	0	0	0	5	0	5	0	0	0	0	0	0	0	0	0	0	0	0	0	Bacteria; Proteobacteria; Alphaproteobacteria; Rhodobacterales; Rhodobacteraceae; uncultured; uncultured Rhodobacteraceae bacterium
1600	0	0	0	0	0	0	0	0	0	0	0	0	0	0	0	0	0	1	0	0	0	0	0	0	0	0	Bacteria; Proteobacteria; Alphaproteobacteria; Rhodobacterales; Rhodobacteraceae; uncultured; uncultured Rhodobacteraceae bacterium
1601	0	0	0	0	0	0	0	0	0	0	0	0	0	0	0	0	0	0	0	0	0	0	0	0	1	0	Bacteria; Proteobacteria; Alphaproteobacteria; Rhodobacterales; Rhodobacteraceae; uncultured; uncultured Rhodobacteraceae bacterium
1602	0	0	0	18	0	0	0	0	6	0	6	12	5	0	0	0	0	0	9	0	2	0	0	0	7	14	Bacteria; Proteobacteria; Alphaproteobacteria; Rhodobacterales; Rhodobacteraceae; uncultured; uncultured Rhodobacteraceae bacterium
1603	0	0	0	12	0	0	6	8	0	0	0	0	8	0	3	0	0	0	4	0	13	0	11	0	0	3	Bacteria; Proteobacteria; Alphaproteobacteria; Rhodobacterales; Rhodobacteraceae; uncultured; unidentified marine bacterioplankton
1604	0	0	0	7	0	6	0	0	0	6	0	0	5	0	0	0	0	0	0	0	0	0	0	0	0	0	Bacteria; Proteobacteria; Alphaproteobacteria; Rhodobacterales; Rhodobacteraceae; uncultured; unidentified marine bacterioplankton
1605	0	0	0	1	0	0	0	0	0	0	0	0	0	0	0	0	0	0	0	0	0	0	0	0	0	0	Bacteria; Proteobacteria; Alphaproteobacteria; Rhodospirillales; Acetobacteraceae; Acidiphilium; uncultured bacterium
1606	0	0	0	2	0	0	0	0	0	0	14	1	0	0	0	0	0	0	0	0	0	0	0	1	0	0	Bacteria; Proteobacteria; Alphaproteobacteria; Rhodospirillales; Acetobacteraceae; Acidisoma; Acidisoma tundrae
1607	0	0	0	1	0	0	0	0	0	0	0	0	0	0	0	0	0	0	0	0	0	0	0	0	0	0	Bacteria; Proteobacteria; Alphaproteobacteria; Rhodospirillales; Acetobacteraceae; Acidocella; uncultured eubacterium WD238
1608	0	0	0	0	0	0	0	0	0	0	0	0	0	0	1	0	0	0	0	0	0	0	0	0	0	0	Bacteria; Proteobacteria; Alphaproteobacteria; Rhodospirillales; Acetobacteraceae; Roseomonas; uncultured bacterium
1609	0	0	0	0	0	0	0	0	0	0	0	0	0	0	1	0	0	0	0	0	0	0	0	0	0	0	Bacteria; Proteobacteria; Alphaproteobacteria; Rhodospirillales; Acetobacteraceae; Roseomonas; uncultured bacterium
1610	0	0	0	0	0	0	0	0	0	0	12	0	0	0	0	0	0	0	1	0	0	0	3	18	0	0	Bacteria; Proteobacteria; Alphaproteobacteria; Rhodospirillales; Acetobacteraceae; uncultured; uncultured bacterium
1611	0	0	0	1	0	0	0	0	0	0	0	0	0	0	0	0	0	0	0	0	0	0	0	0	0	0	Bacteria; Proteobacteria; Alphaproteobacteria; Rhodospirillales; Acetobacteraceae; uncultured; uncultured bacterium
1612	0	0	0	0	0	0	0	0	0	0	0	0	0	0	0	0	0	0	0	0	0	0	0	0	1	0	Bacteria; Proteobacteria; Alphaproteobacteria; Rhodospirillales; Acetobacteraceae; uncultured; uncultured bacterium
1613	0	0	0	0	0	0	0	0	0	0	1	0	0	0	0	0	0	0	0	0	0	0	0	0	0	0	Bacteria; Proteobacteria; Alphaproteobacteria; Rhodospirillales; AT-s3-44; uncultured marine microorganism
1614	0	0	0	0	0	1	0	0	0	0	0	0	0	0	0	0	0	0	0	0	0	0	0	0	0	0	Bacteria; Proteobacteria; Alphaproteobacteria; Rhodospirillales; I-10; uncultured bacterium
1615	1	0	0	0	0	0	0	0	0	0	0	0	0	0	0	0	0	0	0	0	0	0	0	0	0	0	Bacteria; Proteobacteria; Alphaproteobacteria; Rhodospirillales; MSB-1E8; uncultured bacterium
1616	0	0	0	0	4	0	0	0	1	0	0	0	0	0	0	0	0	0	0	0	0	1	0	0	0	0	Bacteria; Proteobacteria; Alphaproteobacteria; Rhodospirillales; Rhodospirillaceae; AEGEAN-169 marine group; marine metagenome
1617	0	0	0	0	0	0	0	0	0	0	0	0	0	0	0	0	0	0	0	0	0	0	0	0	0	1	Bacteria; Proteobacteria; Alphaproteobacteria; Rhodospirillales; Rhodospirillaceae; AEGEAN-169 marine group; marine metagenome
1618	0	0	0	0	0	0	0	0	0	0	0	0	0	0	0	0	0	0	0	0	0	0	0	0	0	1	Bacteria; Proteobacteria; Alphaproteobacteria; Rhodospirillales; Rhodospirillaceae; AEGEAN-169 marine group; uncultured alpha proteobacterium
1619	0	0	0	0	0	0	0	0	0	0	0	0	0	0	0	0	0	0	0	0	0	0	0	0	0	1	Bacteria; Proteobacteria; Alphaproteobacteria; Rhodospirillales; Rhodospirillaceae; AEGEAN-169 marine group; uncultured alpha proteobacterium
1620	0	0	0	0	3	0	0	0	0	0	0	0	0	0	0	0	0	0	0	0	0	0	0	0	0	0	Bacteria; Proteobacteria; Alphaproteobacteria; Rhodospirillales; Rhodospirillaceae; AEGEAN-169 marine group; uncultured bacterium
1621	0	0	0	1	0	0	0	0	0	0	0	0	0	0	0	0	0	0	0	0	0	0	0	0	1	0	Bacteria; Proteobacteria; Alphaproteobacteria; Rhodospirillales; Rhodospirillaceae; AEGEAN-169 marine group; uncultured marine bacterium
1622	0	0	0	0	0	0	0	0	0	0	0	0	0	0	0	0	0	0	0	0	0	1	0	0	0	0	Bacteria; Proteobacteria; Alphaproteobacteria; Rhodospirillales; Rhodospirillaceae; Defluviicoccus; uncultured alpha proteobacterium
1623	0	0	0	0	0	0	0	0	0	0	0	0	0	0	2	0	0	0	0	0	0	0	0	0	0	0	Bacteria; Proteobacteria; Alphaproteobacteria; Rhodospirillales; Rhodospirillaceae; Defluviicoccus; uncultured alpha proteobacterium
1624	0	0	0	0	0	0	0	0	1	0	0	0	0	0	0	0	0	0	0	0	0	0	0	0	0	0	Bacteria; Proteobacteria; Alphaproteobacteria; Rhodospirillales; Rhodospirillaceae; Defluviicoccus; uncultured alpha proteobacterium
1625	0	0	0	0	0	0	0	0	0	0	0	0	0	0	0	0	0	0	0	0	0	0	0	1	0	0	Bacteria; Proteobacteria; Alphaproteobacteria; Rhodospirillales; Rhodospirillaceae; Defluviicoccus; uncultured alpha proteobacterium
1626	0	0	0	0	0	0	0	0	0	0	0	0	0	0	0	0	0	0	0	0	0	0	0	0	0	1	Bacteria; Proteobacteria; Alphaproteobacteria; Rhodospirillales; Rhodospirillaceae; Defluviicoccus; uncultured alpha proteobacterium
1627	0	0	0	0	0	0	0	0	0	0	0	0	0	0	0	0	0	0	1	0	0	0	0	0	0	0	Bacteria; Proteobacteria; Alphaproteobacteria; Rhodospirillales; Rhodospirillaceae; Defluviicoccus; uncultured alpha proteobacterium
1628	0	0	0	0	3	0	1	1	3	9	18	9	1	0	2	0	0	3	6	6	3	0	11	45	26	4	Bacteria; Proteobacteria; Alphaproteobacteria; Rhodospirillales; Rhodospirillaceae; Defluviicoccus; uncultured alpha proteobacterium
1629	0	0	0	1	0	0	0	0	0	0	0	1	0	0	0	0	0	0	0	0	0	0	0	0	0	1	Bacteria; Proteobacteria; Alphaproteobacteria; Rhodospirillales; Rhodospirillaceae; Defluviicoccus; uncultured alpha proteobacterium
1630	0	0	0	0	0	0	0	0	0	1	0	0	0	0	0	0	0	0	0	0	0	0	0	0	0	0	Bacteria; Proteobacteria; Alphaproteobacteria; Rhodospirillales; Rhodospirillaceae; Defluviicoccus; uncultured alpha proteobacterium
1631	0	0	0	0	0	0	0	0	0	0	0	0	0	0	0	0	0	0	0	0	1	0	0	0	0	0	Bacteria; Proteobacteria; Alphaproteobacteria; Rhodospirillales; Rhodospirillaceae; Defluviicoccus; uncultured bacterium
1632	0	0	0	0	0	0	0	0	0	0	0	0	0	0	0	0	0	0	0	0	0	1	0	0	0	0	Bacteria; Proteobacteria; Alphaproteobacteria; Rhodospirillales; Rhodospirillaceae; Defluviicoccus; uncultured bacterium
1633	0	0	0	1	0	0	0	0	0	0	0	0	0	0	0	0	0	0	0	0	0	0	0	0	0	0	Bacteria; Proteobacteria; Alphaproteobacteria; Rhodospirillales; Rhodospirillaceae; Defluviicoccus; uncultured bacterium
1634	0	0	0	0	0	0	0	0	0	0	0	0	0	0	0	0	0	0	1	0	0	0	0	0	1	0	Bacteria; Proteobacteria; Alphaproteobacteria; Rhodospirillales; Rhodospirillaceae; Defluviicoccus; uncultured bacterium
1635	0	0	0	22	0	0	0	0	0	0	2	0	19	0	0	0	0	0	2	1	0	1	0	0	0	19	Bacteria; Proteobacteria; Alphaproteobacteria; Rhodospirillales; Rhodospirillaceae; Defluviicoccus; uncultured bacterium
1636	0	0	0	0	0	0	0	0	0	0	0	0	0	0	0	0	0	0	0	0	1	0	0	0	0	0	Bacteria; Proteobacteria; Alphaproteobacteria; Rhodospirillales; Rhodospirillaceae; Defluviicoccus; uncultured bacterium
1637	0	0	0	0	0	0	0	0	0	0	0	0	0	0	0	0	0	0	0	0	0	0	0	0	1	0	Bacteria; Proteobacteria; Alphaproteobacteria; Rhodospirillales; Rhodospirillaceae; Defluviicoccus; uncultured bacterium
1638	0	0	0	0	0	0	0	0	0	0	0	0	0	0	0	0	0	0	0	0	0	0	0	0	0	1	Bacteria; Proteobacteria; Alphaproteobacteria; Rhodospirillales; Rhodospirillaceae; Defluviicoccus; uncultured bacterium
1639	0	0	0	0	0	0	0	0	0	0	0	0	0	0	0	0	0	0	0	0	0	0	0	0	7	0	Bacteria; Proteobacteria; Alphaproteobacteria; Rhodospirillales; Rhodospirillaceae; Defluviicoccus; uncultured bacterium
1640	0	0	0	0	0	0	0	0	0	0	0	0	0	0	0	0	0	0	1	0	0	0	0	0	0	0	Bacteria; Proteobacteria; Alphaproteobacteria; Rhodospirillales; Rhodospirillaceae; Defluviicoccus; uncultured bacterium
1641	0	0	0	32	0	0	0	0	3	0	9	5	21	0	0	0	0	1	1	2	0	1	0	5	5	19	Bacteria; Proteobacteria; Alphaproteobacteria; Rhodospirillales; Rhodospirillaceae; Defluviicoccus; uncultured bacterium
1642	0	0	0	0	0	0	0	0	0	0	0	0	0	0	0	0	0	0	1	1	0	0	0	0	0	0	Bacteria; Proteobacteria; Alphaproteobacteria; Rhodospirillales; Rhodospirillaceae; Defluviicoccus; uncultured bacterium
1643	0	0	0	2	0	0	0	0	0	0	0	0	0	0	0	0	0	0	0	0	0	0	0	0	0	0	Bacteria; Proteobacteria; Alphaproteobacteria; Rhodospirillales; Rhodospirillaceae; Defluviicoccus; uncultured bacterium
1644	0	0	0	0	0	0	0	0	0	0	0	0	0	0	0	0	0	0	1	0	0	0	0	0	0	0	Bacteria; Proteobacteria; Alphaproteobacteria; Rhodospirillales; Rhodospirillaceae; Defluviicoccus; uncultured bacterium
1645	0	0	0	0	0	0	0	0	0	0	0	0	0	0	0	0	0	0	0	1	0	0	0	0	0	0	Bacteria; Proteobacteria; Alphaproteobacteria; Rhodospirillales; Rhodospirillaceae; Defluviicoccus; uncultured deep-sea bacterium
1646	0	0	0	0	0	0	0	0	0	0	0	0	0	0	0	0	0	0	0	0	0	0	0	0	0	1	Bacteria; Proteobacteria; Alphaproteobacteria; Rhodospirillales; Rhodospirillaceae; Defluviicoccus; uncultured organism
1647	0	0	0	2	0	0	0	0	0	0	0	1	1	0	0	0	0	0	0	0	0	0	0	0	0	0	Bacteria; Proteobacteria; Alphaproteobacteria; Rhodospirillales; Rhodospirillaceae; Defluviicoccus; uncultured SAR11 cluster alpha proteobacterium
1648	0	0	0	0	0	1	0	0	0	0	0	0	0	0	0	0	0	0	0	0	0	0	0	0	0	0	Bacteria; Proteobacteria; Alphaproteobacteria; Rhodospirillales; Rhodospirillaceae; Magnetospira; uncultured alpha proteobacterium
1649	0	0	0	0	0	0	0	0	0	0	2	0	0	0	0	0	0	0	0	0	0	0	0	0	0	0	Bacteria; Proteobacteria; Alphaproteobacteria; Rhodospirillales; Rhodospirillaceae; Magnetospira; uncultured alpha proteobacterium
1650	0	0	0	0	0	0	0	0	0	0	0	0	0	0	2	0	0	0	0	0	0	0	0	0	0	0	Bacteria; Proteobacteria; Alphaproteobacteria; Rhodospirillales; Rhodospirillaceae; Magnetospira; uncultured bacterium
1651	0	0	2	1	0	0	0	0	2	0	2	0	0	0	0	0	0	0	1	1	0	0	0	2	0	0	Bacteria; Proteobacteria; Alphaproteobacteria; Rhodospirillales; Rhodospirillaceae; Magnetospira; uncultured bacterium
1652	0	0	0	0	0	0	0	0	0	3	0	0	0	0	0	0	0	0	0	0	0	0	0	0	1	0	Bacteria; Proteobacteria; Alphaproteobacteria; Rhodospirillales; Rhodospirillaceae; Magnetospira; uncultured bacterium
1653	0	0	0	0	0	0	0	0	0	0	0	0	0	0	0	0	0	0	0	0	0	0	1	0	0	0	Bacteria; Proteobacteria; Alphaproteobacteria; Rhodospirillales; Rhodospirillaceae; Magnetospira; uncultured bacterium
1654	0	0	0	0	0	0	0	0	0	0	0	0	0	0	0	0	0	0	0	0	1	0	0	0	0	0	Bacteria; Proteobacteria; Alphaproteobacteria; Rhodospirillales; Rhodospirillaceae; Magnetospira; uncultured marine bacterium
1655	0	0	0	0	0	0	0	0	0	0	0	0	0	0	0	1	0	0	0	0	0	0	0	0	0	0	Bacteria; Proteobacteria; Alphaproteobacteria; Rhodospirillales; Rhodospirillaceae; Magnetospira; uncultured marine bacterium
1656	0	0	0	0	0	0	0	0	0	0	0	0	0	0	0	0	0	0	0	0	0	0	0	0	0	1	Bacteria; Proteobacteria; Alphaproteobacteria; Rhodospirillales; Rhodospirillaceae; OM75 clade; uncultured alpha proteobacterium
1657	0	0	0	0	0	0	0	0	0	0	0	0	0	0	0	0	0	0	0	0	0	0	0	0	0	1	Bacteria; Proteobacteria; Alphaproteobacteria; Rhodospirillales; Rhodospirillaceae; OM75 clade; uncultured alpha proteobacterium
1658	0	0	0	0	0	0	0	0	0	0	0	0	0	0	0	0	0	0	0	0	0	0	0	0	0	1	Bacteria; Proteobacteria; Alphaproteobacteria; Rhodospirillales; Rhodospirillaceae; OM75 clade; uncultured alpha proteobacterium
1659	0	0	0	212	18	9	3	0	34	5	268	59	158	0	0	0	0	59	21	11	0	27	24	474	222	265	Bacteria; Proteobacteria; Alphaproteobacteria; Rhodospirillales; Rhodospirillaceae; OM75 clade; uncultured bacterium
1660	0	0	0	0	0	0	0	0	0	0	0	0	0	0	0	0	0	0	0	0	0	0	0	0	0	1	Bacteria; Proteobacteria; Alphaproteobacteria; Rhodospirillales; Rhodospirillaceae; OM75 clade; uncultured bacterium
1661	0	0	0	0	0	0	0	0	0	0	0	0	0	0	0	0	0	0	0	0	0	0	0	0	4	0	Bacteria; Proteobacteria; Alphaproteobacteria; Rhodospirillales; Rhodospirillaceae; OM75 clade; uncultured bacterium
1662	0	0	0	0	0	0	0	0	0	0	0	0	0	0	0	0	0	0	1	0	0	0	0	0	0	0	Bacteria; Proteobacteria; Alphaproteobacteria; Rhodospirillales; Rhodospirillaceae; OM75 clade; uncultured bacterium
1663	0	0	0	0	0	0	0	0	0	0	0	0	0	0	0	0	0	0	0	0	0	0	0	1	0	0	Bacteria; Proteobacteria; Alphaproteobacteria; Rhodospirillales; Rhodospirillaceae; OM75 clade; uncultured bacterium
1664	0	0	0	2	0	0	0	0	0	0	0	0	1	0	0	0	0	0	0	0	0	0	0	5	0	0	Bacteria; Proteobacteria; Alphaproteobacteria; Rhodospirillales; Rhodospirillaceae; OM75 clade; uncultured bacterium
1665	1	0	0	0	0	0	0	0	0	6	0	0	0	0	0	0	0	0	0	0	0	0	0	0	0	0	Bacteria; Proteobacteria; Alphaproteobacteria; Rhodospirillales; Rhodospirillaceae; OM75 clade; uncultured bacterium
1666	0	0	0	0	0	0	0	0	0	0	0	0	1	0	0	0	0	0	0	0	0	0	0	0	0	0	Bacteria; Proteobacteria; Alphaproteobacteria; Rhodospirillales; Rhodospirillaceae; OM75 clade; uncultured bacterium
1667	0	0	0	0	0	0	0	0	0	0	0	0	3	0	0	0	0	0	0	0	0	0	1	0	0	8	Bacteria; Proteobacteria; Alphaproteobacteria; Rhodospirillales; Rhodospirillaceae; OM75 clade; uncultured bacterium
1668	0	0	0	0	0	0	0	0	0	0	0	0	0	0	0	0	0	0	1	0	0	0	0	0	0	0	Bacteria; Proteobacteria; Alphaproteobacteria; Rhodospirillales; Rhodospirillaceae; OM75 clade; uncultured bacterium
1669	0	0	0	0	0	0	0	0	0	0	0	0	0	0	0	0	0	0	0	0	0	0	0	0	1	0	Bacteria; Proteobacteria; Alphaproteobacteria; Rhodospirillales; Rhodospirillaceae; OM75 clade; uncultured bacterium
1670	0	0	0	0	0	0	0	0	0	0	0	0	0	0	0	0	0	0	0	0	0	0	0	0	0	1	Bacteria; Proteobacteria; Alphaproteobacteria; Rhodospirillales; Rhodospirillaceae; OM75 clade; uncultured bacterium
1671	0	0	0	0	0	0	0	0	0	0	0	0	0	0	0	0	0	0	0	0	0	0	1	0	0	1	Bacteria; Proteobacteria; Alphaproteobacteria; Rhodospirillales; Rhodospirillaceae; OM75 clade; uncultured bacterium
1672	0	0	0	0	0	0	0	0	0	0	0	0	0	0	0	0	0	0	0	0	0	0	0	1	0	0	Bacteria; Proteobacteria; Alphaproteobacteria; Rhodospirillales; Rhodospirillaceae; OM75 clade; uncultured bacterium
1673	0	0	0	0	0	0	0	0	0	0	0	0	0	0	0	0	0	0	0	0	0	1	0	0	0	0	Bacteria; Proteobacteria; Alphaproteobacteria; Rhodospirillales; Rhodospirillaceae; OM75 clade; uncultured bacterium
1674	0	0	0	0	0	0	0	0	0	0	0	0	0	0	0	0	0	0	0	0	0	0	0	0	0	1	Bacteria; Proteobacteria; Alphaproteobacteria; Rhodospirillales; Rhodospirillaceae; OM75 clade; uncultured bacterium
1675	0	0	0	0	0	0	0	0	0	0	0	0	0	0	0	0	0	0	0	0	0	0	0	0	0	1	Bacteria; Proteobacteria; Alphaproteobacteria; Rhodospirillales; Rhodospirillaceae; OM75 clade; uncultured marine bacterium
1676	0	0	0	0	0	0	0	0	0	0	0	0	0	0	0	0	0	0	0	0	0	0	0	0	0	1	Bacteria; Proteobacteria; Alphaproteobacteria; Rhodospirillales; Rhodospirillaceae; OM75 clade; uncultured marine bacterium
1677	0	0	0	0	0	0	0	0	0	0	0	0	0	0	0	0	0	0	0	0	0	0	0	0	1	0	Bacteria; Proteobacteria; Alphaproteobacteria; Rhodospirillales; Rhodospirillaceae; OM75 clade; uncultured marine bacterium
1678	0	0	0	0	0	0	0	0	0	0	0	0	0	0	1	0	0	0	0	0	0	0	0	0	0	0	Bacteria; Proteobacteria; Alphaproteobacteria; Rhodospirillales; Rhodospirillaceae; Pelagibius; uncultured bacterium
1679	0	0	0	0	0	1	0	0	1	0	0	0	0	0	0	0	0	0	0	0	0	0	0	0	0	0	Bacteria; Proteobacteria; Alphaproteobacteria; Rhodospirillales; Rhodospirillaceae; Skermanella; uncultured bacterium
1680	0	0	0	0	0	0	0	0	0	0	0	0	0	0	0	0	0	0	0	0	0	0	1	0	0	0	Bacteria; Proteobacteria; Alphaproteobacteria; Rhodospirillales; Rhodospirillaceae; Thalassobaculum; bacterium DG949
1681	0	0	0	0	0	0	0	0	0	0	0	0	0	0	0	0	0	0	0	0	0	0	1	0	0	0	Bacteria; Proteobacteria; Alphaproteobacteria; Rhodospirillales; Rhodospirillaceae; Thalassobaculum; bacterium DG949
1682	0	0	0	0	0	0	0	0	1	7	0	0	0	0	0	0	0	0	0	0	0	0	15	0	0	0	Bacteria; Proteobacteria; Alphaproteobacteria; Rhodospirillales; Rhodospirillaceae; Thalassobaculum; bacterium DG949
1683	0	0	0	0	0	0	0	0	0	0	0	0	0	0	0	0	0	0	0	0	1	0	0	0	0	0	Bacteria; Proteobacteria; Alphaproteobacteria; Rhodospirillales; Rhodospirillaceae; Thalassospira; uncultured bacterium
1684	0	0	0	0	0	0	0	0	0	0	0	0	0	1	0	0	0	0	0	0	0	0	0	0	0	0	Bacteria; Proteobacteria; Alphaproteobacteria; Rhodospirillales; Rhodospirillaceae; Thalassospira; uncultured bacterium
1685	0	0	0	0	0	0	0	0	0	0	0	0	0	1	1	0	0	0	0	0	0	0	0	0	0	0	Bacteria; Proteobacteria; Alphaproteobacteria; Rhodospirillales; Rhodospirillaceae; Thalassospira; uncultured bacterium
1686	0	0	0	0	0	0	0	0	0	0	0	0	0	0	0	0	0	0	0	1	0	0	0	0	0	0	Bacteria; Proteobacteria; Alphaproteobacteria; Rhodospirillales; Rhodospirillaceae; Thalassospira; uncultured organism
1687	0	0	0	0	0	0	0	0	0	0	0	0	0	0	0	0	0	0	2	0	0	0	0	0	0	0	Bacteria; Proteobacteria; Alphaproteobacteria; Rhodospirillales; Rhodospirillaceae; Thalassospira; uncultured organism
1688	0	0	0	0	0	0	0	0	0	0	0	0	0	0	1	0	0	0	0	0	0	0	0	0	0	0	Bacteria; Proteobacteria; Alphaproteobacteria; Rhodospirillales; Rhodospirillaceae; Thalassospira; uncultured organism
1689	0	0	0	0	0	0	0	0	0	0	0	0	0	0	0	0	0	1	0	0	0	0	0	0	0	0	Bacteria; Proteobacteria; Alphaproteobacteria; Rhodospirillales; Rhodospirillaceae; Thalassospira; uncultured organism
1690	0	1	0	0	0	0	0	0	0	0	0	0	0	1	0	0	0	0	3	0	8	0	0	0	0	0	Bacteria; Proteobacteria; Alphaproteobacteria; Rhodospirillales; Rhodospirillaceae; Thalassospira; uncultured organism
1691	0	0	0	0	0	0	0	0	0	0	0	0	0	0	0	1	0	0	0	0	0	0	0	0	0	0	Bacteria; Proteobacteria; Alphaproteobacteria; Rhodospirillales; Rhodospirillaceae; Thalassospira; uncultured organism
1692	0	0	0	0	0	0	0	0	0	0	0	0	0	1	1	0	0	0	0	0	0	1	0	0	0	0	Bacteria; Proteobacteria; Alphaproteobacteria; Rhodospirillales; Rhodospirillaceae; Thalassospira; uncultured organism
1693	0	0	0	0	0	0	0	0	0	0	0	0	0	0	0	0	0	0	0	0	0	0	0	9	0	0	Bacteria; Proteobacteria; Alphaproteobacteria; Rhodospirillales; Rhodospirillaceae; uncultured; uncultured alpha proteobacterium
1694	0	0	0	0	0	0	0	0	0	0	0	0	0	0	1	0	0	0	0	0	0	0	0	0	0	0	Bacteria; Proteobacteria; Alphaproteobacteria; Rhodospirillales; Rhodospirillaceae; uncultured; uncultured alpha proteobacterium
1695	0	0	0	0	0	0	0	0	0	0	0	0	0	0	0	0	0	0	0	0	0	0	0	1	0	0	Bacteria; Proteobacteria; Alphaproteobacteria; Rhodospirillales; Rhodospirillaceae; uncultured; uncultured alpha proteobacterium
1696	0	0	0	0	0	0	0	0	0	0	3	0	0	0	0	0	0	0	0	0	0	0	1	1	7	0	Bacteria; Proteobacteria; Alphaproteobacteria; Rhodospirillales; Rhodospirillaceae; uncultured; uncultured alpha proteobacterium
1697	0	0	0	0	0	0	0	0	0	0	0	0	0	11	0	2	0	0	0	0	0	0	0	0	0	0	Bacteria; Proteobacteria; Alphaproteobacteria; Rhodospirillales; Rhodospirillaceae; uncultured; uncultured alpha proteobacterium
1698	0	0	0	0	0	0	0	0	0	0	0	0	0	0	0	0	0	0	0	0	0	0	0	0	0	1	Bacteria; Proteobacteria; Alphaproteobacteria; Rhodospirillales; Rhodospirillaceae; uncultured; uncultured alpha proteobacterium
1699	0	0	0	0	0	0	0	0	0	0	0	0	1	0	0	0	0	0	0	0	0	0	0	0	0	0	Bacteria; Proteobacteria; Alphaproteobacteria; Rhodospirillales; Rhodospirillaceae; uncultured; uncultured alpha proteobacterium
1700	0	0	0	0	0	0	0	0	0	0	0	0	1	0	0	0	0	0	0	0	0	0	0	0	0	0	Bacteria; Proteobacteria; Alphaproteobacteria; Rhodospirillales; Rhodospirillaceae; uncultured; uncultured alpha proteobacterium
1701	0	0	0	2	0	0	0	0	0	0	1	0	0	0	0	0	0	0	0	0	0	0	0	0	1	0	Bacteria; Proteobacteria; Alphaproteobacteria; Rhodospirillales; Rhodospirillaceae; uncultured; uncultured bacterium
1702	0	0	0	0	0	0	0	0	0	0	0	1	0	0	0	0	0	0	0	1	0	0	0	0	0	0	Bacteria; Proteobacteria; Alphaproteobacteria; Rhodospirillales; Rhodospirillaceae; uncultured; uncultured bacterium
1703	0	0	0	89	2	0	1	0	7	2	57	26	57	0	0	0	0	2	7	3	1	12	7	65	25	117	Bacteria; Proteobacteria; Alphaproteobacteria; Rhodospirillales; Rhodospirillaceae; uncultured; uncultured bacterium
1704	0	0	0	0	0	0	0	0	0	0	0	0	0	0	0	0	0	0	0	0	0	0	1	0	0	0	Bacteria; Proteobacteria; Alphaproteobacteria; Rhodospirillales; Rhodospirillaceae; uncultured; uncultured bacterium
1705	0	0	0	0	0	0	0	0	0	0	0	0	0	0	0	0	0	0	0	0	0	0	1	0	0	0	Bacteria; Proteobacteria; Alphaproteobacteria; Rhodospirillales; Rhodospirillaceae; uncultured; uncultured bacterium
1706	0	0	0	2	0	0	0	0	0	0	0	0	0	0	0	0	0	0	0	0	0	0	0	0	0	0	Bacteria; Proteobacteria; Alphaproteobacteria; Rhodospirillales; Rhodospirillaceae; uncultured; uncultured bacterium
1707	0	0	0	0	0	0	0	0	0	0	1	0	0	0	0	0	0	0	0	0	0	0	0	0	0	0	Bacteria; Proteobacteria; Alphaproteobacteria; Rhodospirillales; Rhodospirillaceae; uncultured; uncultured bacterium
1708	0	0	0	0	0	0	0	0	0	0	0	0	0	0	0	0	0	0	0	0	0	0	0	0	0	1	Bacteria; Proteobacteria; Alphaproteobacteria; Rhodospirillales; Rhodospirillaceae; uncultured; uncultured bacterium
1709	0	0	0	0	0	0	0	0	0	0	0	0	0	0	0	0	0	0	0	0	0	0	0	0	0	1	Bacteria; Proteobacteria; Alphaproteobacteria; Rhodospirillales; Rhodospirillaceae; uncultured; uncultured bacterium
1710	0	0	0	0	0	0	0	0	0	0	0	0	0	0	0	0	0	0	0	0	0	0	0	1	0	0	Bacteria; Proteobacteria; Alphaproteobacteria; Rhodospirillales; Rhodospirillaceae; uncultured; uncultured bacterium
1711	0	0	0	0	0	0	0	0	0	0	12	1	2	0	0	0	0	0	0	0	0	0	0	8	1	2	Bacteria; Proteobacteria; Alphaproteobacteria; Rhodospirillales; Rhodospirillaceae; uncultured; uncultured bacterium
1712	0	0	0	0	0	0	0	0	0	0	0	0	0	0	0	0	0	0	0	0	0	0	0	0	0	1	Bacteria; Proteobacteria; Alphaproteobacteria; Rhodospirillales; Rhodospirillaceae; uncultured; uncultured bacterium
1713	0	0	0	0	0	0	0	0	0	0	0	0	0	0	0	0	0	0	0	0	0	0	0	0	1	0	Bacteria; Proteobacteria; Alphaproteobacteria; Rhodospirillales; Rhodospirillaceae; uncultured; uncultured bacterium
1714	0	0	0	9	6	1	1	0	0	1	14	4	12	0	0	0	0	2	3	0	0	1	1	12	0	2	Bacteria; Proteobacteria; Alphaproteobacteria; Rhodospirillales; Rhodospirillaceae; uncultured; uncultured bacterium
1715	0	0	0	0	7	0	0	5	0	30	0	0	0	0	0	0	0	16	0	19	2	0	45	0	0	0	Bacteria; Proteobacteria; Alphaproteobacteria; Rhodospirillales; Rhodospirillaceae; uncultured; uncultured bacterium
1716	0	0	0	0	0	1	0	0	0	0	0	0	0	0	0	0	0	0	0	0	0	0	0	0	0	0	Bacteria; Proteobacteria; Alphaproteobacteria; Rhodospirillales; Rhodospirillaceae; uncultured; uncultured bacterium
1717	0	0	0	0	0	0	0	0	0	0	0	0	0	0	0	0	0	0	0	0	1	0	0	0	0	0	Bacteria; Proteobacteria; Alphaproteobacteria; Rhodospirillales; Rhodospirillaceae; uncultured; uncultured bacterium
1718	0	0	0	0	0	0	0	0	0	0	0	0	0	0	0	0	0	0	0	0	0	0	0	0	0	1	Bacteria; Proteobacteria; Alphaproteobacteria; Rhodospirillales; Rhodospirillaceae; uncultured; uncultured bacterium
1719	0	0	0	0	0	0	0	0	1	0	0	0	0	0	0	0	0	0	0	0	0	0	0	0	1	0	Bacteria; Proteobacteria; Alphaproteobacteria; Rhodospirillales; Rhodospirillaceae; uncultured; uncultured bacterium
1720	0	0	0	4	0	1	0	0	1	0	3	4	3	0	0	0	0	1	0	0	0	0	0	0	7	1	Bacteria; Proteobacteria; Alphaproteobacteria; Rhodospirillales; Rhodospirillaceae; uncultured; uncultured bacterium
1721	0	0	0	0	0	0	0	0	0	0	0	0	0	0	0	0	0	0	0	0	0	0	0	0	0	1	Bacteria; Proteobacteria; Alphaproteobacteria; Rhodospirillales; Rhodospirillaceae; uncultured; uncultured bacterium
1722	0	0	0	0	0	0	1	0	0	0	0	0	0	0	0	0	1	0	0	0	0	0	0	0	0	0	Bacteria; Proteobacteria; Alphaproteobacteria; Rhodospirillales; Rhodospirillaceae; uncultured; uncultured bacterium
1723	0	0	0	1	0	0	0	0	0	0	0	0	0	0	0	0	0	0	0	0	0	0	0	0	0	0	Bacteria; Proteobacteria; Alphaproteobacteria; Rhodospirillales; Rhodospirillaceae; uncultured; uncultured bacterium
1724	0	0	0	0	0	0	0	0	0	0	0	0	0	0	0	0	0	0	0	0	0	0	0	0	0	1	Bacteria; Proteobacteria; Alphaproteobacteria; Rhodospirillales; Rhodospirillaceae; uncultured; uncultured bacterium
1725	0	0	0	0	0	0	0	0	0	0	0	0	0	0	0	0	0	1	0	0	0	0	0	0	0	0	Bacteria; Proteobacteria; Alphaproteobacteria; Rhodospirillales; Rhodospirillaceae; uncultured; uncultured bacterium
1726	0	0	2	3	6	0	0	6	11	27	17	10	2	7	0	0	0	15	27	20	4	11	53	41	13	10	Bacteria; Proteobacteria; Alphaproteobacteria; Rhodospirillales; Rhodospirillaceae; uncultured; uncultured bacterium
1727	0	0	0	0	0	0	0	0	0	0	0	0	0	0	0	0	0	0	0	0	0	0	0	0	0	1	Bacteria; Proteobacteria; Alphaproteobacteria; Rhodospirillales; Rhodospirillaceae; uncultured; uncultured bacterium
1728	0	0	0	0	0	0	0	0	0	0	0	0	0	0	0	0	0	0	0	0	0	0	0	0	0	1	Bacteria; Proteobacteria; Alphaproteobacteria; Rhodospirillales; Rhodospirillaceae; uncultured; uncultured bacterium
1729	0	0	0	0	0	0	0	0	1	0	0	0	0	0	0	0	0	0	0	0	0	0	0	0	2	0	Bacteria; Proteobacteria; Alphaproteobacteria; Rhodospirillales; Rhodospirillaceae; uncultured; uncultured bacterium
1730	0	0	0	0	0	0	0	0	0	0	0	0	0	0	0	0	0	0	0	0	0	0	0	0	0	1	Bacteria; Proteobacteria; Alphaproteobacteria; Rhodospirillales; Rhodospirillaceae; uncultured; uncultured bacterium
1731	0	0	0	0	0	0	0	0	4	46	4	1	0	0	0	0	0	0	0	0	0	1	29	0	0	0	Bacteria; Proteobacteria; Alphaproteobacteria; Rhodospirillales; Rhodospirillaceae; uncultured; uncultured bacterium
1732	0	0	0	0	0	0	0	0	0	0	0	0	0	0	0	0	0	0	0	0	0	0	0	0	0	3	Bacteria; Proteobacteria; Alphaproteobacteria; Rhodospirillales; Rhodospirillaceae; uncultured; uncultured bacterium
1733	0	0	0	0	0	0	0	0	0	0	0	0	0	0	0	0	0	0	0	0	0	0	0	1	0	0	Bacteria; Proteobacteria; Alphaproteobacteria; Rhodospirillales; Rhodospirillaceae; uncultured; uncultured bacterium
1734	0	0	0	0	0	0	0	0	0	0	0	0	0	0	0	0	0	0	0	2	0	0	1	0	0	3	Bacteria; Proteobacteria; Alphaproteobacteria; Rhodospirillales; Rhodospirillaceae; uncultured; uncultured bacterium
1735	0	0	0	0	0	0	0	0	0	0	0	0	0	0	0	0	0	0	0	0	0	0	0	0	0	1	Bacteria; Proteobacteria; Alphaproteobacteria; Rhodospirillales; Rhodospirillaceae; uncultured; uncultured bacterium
1736	0	0	0	0	0	0	0	0	0	0	0	0	0	0	0	0	0	0	0	0	0	0	3	0	0	0	Bacteria; Proteobacteria; Alphaproteobacteria; Rhodospirillales; Rhodospirillaceae; uncultured; uncultured bacterium
1737	0	0	0	0	0	0	0	0	0	0	0	0	0	0	0	0	0	1	0	0	0	0	0	0	0	0	Bacteria; Proteobacteria; Alphaproteobacteria; Rhodospirillales; Rhodospirillaceae; uncultured; uncultured bacterium
1738	0	0	0	0	0	0	0	0	0	0	0	0	0	0	0	0	0	2	0	0	0	0	0	0	0	0	Bacteria; Proteobacteria; Alphaproteobacteria; Rhodospirillales; Rhodospirillaceae; uncultured; uncultured bacterium
1739	0	0	0	0	0	0	0	0	0	1	8	1	0	0	0	0	0	0	0	0	0	0	0	0	0	0	Bacteria; Proteobacteria; Alphaproteobacteria; Rhodospirillales; Rhodospirillaceae; uncultured; uncultured marine bacterium
1740	0	0	0	0	0	0	0	0	0	0	0	0	0	0	0	0	0	0	1	0	0	0	0	0	0	0	Bacteria; Proteobacteria; Alphaproteobacteria; Rhodospirillales; Rhodospirillaceae; uncultured; uncultured Rhodobacteraceae bacterium
1741	0	0	0	0	0	1	0	0	0	0	0	0	0	0	0	0	0	0	0	0	0	0	0	0	0	0	Bacteria; Proteobacteria; Alphaproteobacteria; Rhodospirillales; Rhodospirillales Incertae Sedis; Reyranella; uncultured bacterium
1742	0	0	0	0	0	0	0	0	0	0	0	0	0	0	0	1	0	0	0	0	0	0	0	0	0	0	Bacteria; Proteobacteria; Alphaproteobacteria; Rickettsiales; Anaplasmataceae; Ehrlichia; Ehrlichia muris AS145
1743	0	0	0	0	0	0	0	0	0	0	0	0	0	4	64	3	0	0	0	0	1	0	0	0	0	0	Bacteria; Proteobacteria; Alphaproteobacteria; Rickettsiales; Anaplasmataceae; Ehrlichia; Ehrlichia muris AS145
1744	0	0	0	0	0	0	0	0	1	0	0	0	0	0	0	0	0	0	2	1	0	0	0	0	0	2	Bacteria; Proteobacteria; Alphaproteobacteria; Rickettsiales; Anaplasmataceae; Ehrlichia; uncultured Ehrlichia sp.
1745	0	0	0	0	0	0	0	0	0	0	0	0	0	0	0	0	0	0	1	0	0	0	0	0	0	0	Bacteria; Proteobacteria; Alphaproteobacteria; Rickettsiales; Anaplasmataceae; Neorickettsia; uncultured bacterium
1746	0	0	0	0	0	0	0	0	0	0	1	1	0	0	0	0	0	0	0	0	0	0	0	0	0	0	Bacteria; Proteobacteria; Alphaproteobacteria; Rickettsiales; EF100-94H03; uncultured bacterium
1747	0	0	0	0	0	0	0	0	0	0	0	0	0	1	0	0	0	0	0	0	0	0	0	0	0	0	Bacteria; Proteobacteria; Alphaproteobacteria; Rickettsiales; Holosporaceae; uncultured; uncultured alpha proteobacterium
1748	0	0	0	0	0	0	0	0	0	0	0	0	0	0	0	0	1	0	0	0	0	0	0	0	0	0	Bacteria; Proteobacteria; Alphaproteobacteria; Rickettsiales; Holosporaceae; uncultured; uncultured bacterium
1749	0	0	0	0	0	0	0	0	0	0	0	0	0	0	0	0	0	0	0	0	0	0	0	0	1	0	Bacteria; Proteobacteria; Alphaproteobacteria; Rickettsiales; LR A2-29; uncultured bacterium
1750	0	0	0	0	0	0	0	0	0	0	0	0	0	0	0	0	0	0	2	0	0	0	0	0	0	0	Bacteria; Proteobacteria; Alphaproteobacteria; Rickettsiales; LWSR-14; uncultured alpha proteobacterium
1751	0	0	0	0	0	1	0	0	0	0	0	0	0	0	0	0	0	0	0	0	0	0	0	0	0	0	Bacteria; Proteobacteria; Alphaproteobacteria; Rickettsiales; LWSR-14; uncultured bacterium
1752	0	0	0	0	0	0	0	0	0	0	0	0	0	2	0	0	0	0	0	0	0	0	0	0	0	0	Bacteria; Proteobacteria; Alphaproteobacteria; Rickettsiales; LWSR-14; uncultured bacterium
1753	0	0	0	0	0	0	0	0	0	0	0	0	0	0	0	0	0	0	1	0	0	0	0	0	0	0	Bacteria; Proteobacteria; Alphaproteobacteria; Rickettsiales; LWSR-14; uncultured bacterium
1754	0	0	0	1	0	0	0	0	0	0	0	0	0	0	0	0	0	0	0	0	0	0	0	0	0	0	Bacteria; Proteobacteria; Alphaproteobacteria; Rickettsiales; LWSR-14; uncultured bacterium
1755	0	1	0	0	0	0	0	0	0	0	0	0	0	0	0	0	0	0	2	0	0	0	0	0	0	0	Bacteria; Proteobacteria; Alphaproteobacteria; Rickettsiales; mitochondria; Reclinomonas americana
1756	0	0	0	0	0	0	0	0	0	0	0	0	0	0	1	0	0	0	0	0	0	0	0	0	0	0	Bacteria; Proteobacteria; Alphaproteobacteria; Rickettsiales; Rickettsiaceae; Candidatus Cryptoprodotis; uncultured bacterium
1757	0	0	0	0	0	0	0	0	0	0	0	0	0	0	0	0	0	1	1	2	0	0	0	0	0	0	Bacteria; Proteobacteria; Alphaproteobacteria; Rickettsiales; Rickettsiaceae; Rickettsia; uncultured bacterium
1758	1	0	0	0	0	0	0	0	0	0	0	0	0	0	0	0	0	0	0	0	0	0	0	0	0	0	Bacteria; Proteobacteria; Alphaproteobacteria; Rickettsiales; Rickettsiaceae; Rickettsia; uncultured bacterium
1759	0	0	0	0	0	0	0	0	0	0	0	0	0	20	0	0	0	0	0	0	0	0	0	0	0	0	Bacteria; Proteobacteria; Alphaproteobacteria; Rickettsiales; Rickettsiaceae; Rickettsia; uncultured bacterium
1760	0	0	0	0	0	0	0	0	0	0	0	0	0	0	0	0	0	1	0	5	0	0	0	0	0	0	Bacteria; Proteobacteria; Alphaproteobacteria; Rickettsiales; Rickettsiaceae; Rickettsia; uncultured bacterium
1761	0	0	0	0	0	0	0	0	0	0	0	0	0	0	0	0	0	0	0	1	0	0	0	0	0	0	Bacteria; Proteobacteria; Alphaproteobacteria; Rickettsiales; Rickettsiaceae; Rickettsia; uncultured Rickettsia sp.
1762	0	0	0	0	0	0	0	0	0	0	0	0	0	0	0	1	0	0	0	0	2	0	0	0	0	0	Bacteria; Proteobacteria; Alphaproteobacteria; Rickettsiales; Rickettsiaceae; Rickettsia; uncultured Rickettsia sp.
1763	0	0	0	0	0	0	0	0	0	0	0	0	0	0	0	0	0	0	0	1	0	0	0	0	0	0	Bacteria; Proteobacteria; Alphaproteobacteria; Rickettsiales; Rickettsiaceae; Rickettsia; uncultured Rickettsia sp.
1764	0	0	0	0	0	0	0	0	0	0	0	0	0	0	1	1	0	0	0	0	0	0	0	0	0	0	Bacteria; Proteobacteria; Alphaproteobacteria; Rickettsiales; Rickettsiaceae; Rickettsia; uncultured Rickettsia sp.
1765	0	0	0	0	0	0	0	0	0	0	0	0	0	0	0	0	0	0	0	1	0	0	0	0	0	0	Bacteria; Proteobacteria; Alphaproteobacteria; Rickettsiales; Rickettsiaceae; Rickettsia; uncultured Rickettsia sp.
1766	0	0	0	1	0	0	0	0	0	0	0	0	0	0	0	0	0	0	0	0	0	0	0	0	0	0	Bacteria; Proteobacteria; Alphaproteobacteria; Rickettsiales; Rickettsiaceae; Rickettsia; uncultured Rickettsia sp.
1767	0	0	0	0	0	0	0	0	0	0	0	0	0	0	0	1	0	0	0	1	0	0	0	0	0	0	Bacteria; Proteobacteria; Alphaproteobacteria; Rickettsiales; Rickettsiaceae; Rickettsia; uncultured Rickettsia sp.
1768	0	0	1	1	0	0	0	0	0	0	0	0	0	0	0	0	0	0	0	1	0	0	0	0	0	0	Bacteria; Proteobacteria; Alphaproteobacteria; Rickettsiales; Rickettsiaceae; Rickettsia; uncultured Rickettsia sp.
1769	1	0	0	0	0	0	0	0	0	0	0	0	0	0	0	0	0	0	0	0	0	0	0	0	0	0	Bacteria; Proteobacteria; Alphaproteobacteria; Rickettsiales; Rickettsiaceae; Rickettsia; uncultured Rickettsia sp.
1770	0	0	0	0	0	0	0	0	0	0	0	0	0	0	0	0	0	0	0	0	0	0	2	0	0	0	Bacteria; Proteobacteria; Alphaproteobacteria; Rickettsiales; Rickettsiaceae; Rickettsia; uncultured Rickettsia sp.
1771	11	3	6	0	0	0	0	3	0	0	0	0	0	10	50	1	0	0	1	3	0	0	0	0	0	6	Bacteria; Proteobacteria; Alphaproteobacteria; Rickettsiales; Rickettsiaceae; Rickettsia; uncultured Rickettsia sp.
1772	0	0	0	0	0	0	0	0	0	0	0	0	0	0	0	1	0	0	0	0	0	0	0	0	0	0	Bacteria; Proteobacteria; Alphaproteobacteria; Rickettsiales; Rickettsiaceae; Rickettsia; uncultured Rickettsia sp.
1773	0	0	0	0	0	0	1	0	0	0	0	0	0	0	16	0	0	0	0	0	0	0	0	0	0	0	Bacteria; Proteobacteria; Alphaproteobacteria; Rickettsiales; Rickettsiaceae; Rickettsia; uncultured Rickettsia sp.
1774	0	0	0	0	0	0	0	0	0	0	0	0	0	0	0	0	0	3	0	0	0	0	0	0	1	0	Bacteria; Proteobacteria; Alphaproteobacteria; Rickettsiales; Rickettsiaceae; Rickettsia; uncultured Rickettsiales bacterium
1775	0	0	0	0	0	0	0	0	0	0	0	0	0	0	0	0	0	1	2	0	1	0	0	0	0	0	Bacteria; Proteobacteria; Alphaproteobacteria; Rickettsiales; Rickettsiaceae; Rickettsia; uncultured Rickettsiales bacterium
1776	0	0	0	0	0	0	0	0	0	0	0	0	0	0	0	0	0	0	0	1	0	0	0	0	0	0	Bacteria; Proteobacteria; Alphaproteobacteria; Rickettsiales; Rickettsiaceae; uncultured; Sesamum indicum (sesame)
1777	0	0	0	0	0	0	0	0	0	0	0	0	0	0	0	0	0	0	0	0	0	0	2	0	0	0	Bacteria; Proteobacteria; Alphaproteobacteria; Rickettsiales; Rickettsiaceae; uncultured; uncultured bacterium
1778	0	0	0	0	1	0	0	0	0	0	0	0	0	0	0	0	0	0	0	1	0	0	0	0	0	0	Bacteria; Proteobacteria; Alphaproteobacteria; Rickettsiales; Rickettsiaceae; uncultured; uncultured bacterium
1779	0	0	0	0	0	0	0	0	0	0	0	0	0	0	0	1	0	0	0	0	0	0	0	0	0	0	Bacteria; Proteobacteria; Alphaproteobacteria; Rickettsiales; Rickettsiaceae; uncultured; uncultured bacterium
1780	0	0	0	0	0	0	0	0	0	0	0	0	0	0	0	0	0	0	0	1	0	0	0	0	0	0	Bacteria; Proteobacteria; Alphaproteobacteria; Rickettsiales; Rickettsiaceae; uncultured; uncultured bacterium
1781	0	0	0	0	0	0	0	0	0	0	0	0	0	0	0	0	0	0	0	1	0	0	0	0	0	0	Bacteria; Proteobacteria; Alphaproteobacteria; Rickettsiales; Rickettsiaceae; uncultured; uncultured bacterium
1782	0	0	0	0	0	0	0	0	0	0	0	0	0	0	0	0	0	0	0	1	0	0	0	0	0	0	Bacteria; Proteobacteria; Alphaproteobacteria; Rickettsiales; Rickettsiaceae; uncultured; uncultured bacterium
1783	0	0	0	0	0	0	0	0	0	0	0	0	0	0	0	0	0	1	0	0	0	0	0	0	0	0	Bacteria; Proteobacteria; Alphaproteobacteria; Rickettsiales; Rickettsiaceae; uncultured; uncultured bacterium
1784	0	0	0	0	0	0	0	0	0	0	1	0	0	0	0	0	0	0	0	0	0	0	0	0	0	0	Bacteria; Proteobacteria; Alphaproteobacteria; Rickettsiales; Rickettsiaceae; uncultured; uncultured bacterium
1785	0	0	0	0	0	0	0	0	0	0	0	0	0	0	0	0	0	0	1	0	0	0	0	0	0	0	Bacteria; Proteobacteria; Alphaproteobacteria; Rickettsiales; Rickettsiaceae; uncultured; uncultured bacterium
1786	0	0	0	0	0	0	0	0	0	0	0	0	0	0	0	0	0	0	1	0	0	0	0	0	0	0	Bacteria; Proteobacteria; Alphaproteobacteria; Rickettsiales; Rickettsiaceae; uncultured; uncultured bacterium
1787	0	0	1	0	0	6	3	1	0	0	0	0	0	0	0	2	2	3	126	46	9	0	0	0	0	0	Bacteria; Proteobacteria; Alphaproteobacteria; Rickettsiales; Rickettsiaceae; uncultured; uncultured bacterium
1788	0	0	0	0	0	0	0	0	0	0	0	0	0	0	0	0	0	0	0	0	0	0	1	0	0	0	Bacteria; Proteobacteria; Alphaproteobacteria; Rickettsiales; Rickettsiaceae; uncultured; uncultured bacterium
1789	0	0	0	0	0	0	0	0	0	0	0	0	0	0	0	0	0	0	0	0	2	0	0	0	0	0	Bacteria; Proteobacteria; Alphaproteobacteria; Rickettsiales; Rickettsiales Incertae Sedis; Candidatus Lariskella; uncultured alpha proteobacterium
1790	0	0	0	0	0	0	0	0	0	0	0	0	0	0	0	0	1	0	1	0	2	0	0	0	1	0	Bacteria; Proteobacteria; Alphaproteobacteria; Rickettsiales; Rickettsiales Incertae Sedis; Candidatus Lariskella; uncultured alpha proteobacterium
1791	0	0	0	0	0	0	0	0	0	0	0	0	0	0	0	0	1	0	0	0	0	0	0	0	0	0	Bacteria; Proteobacteria; Alphaproteobacteria; Rickettsiales; Rickettsiales Incertae Sedis; Candidatus Lariskella; uncultured alpha proteobacterium
1792	0	0	0	0	0	0	0	0	0	0	0	0	0	0	0	0	0	3	0	0	0	0	0	0	0	0	Bacteria; Proteobacteria; Alphaproteobacteria; Rickettsiales; Rickettsiales Incertae Sedis; Candidatus Lariskella; uncultured alpha proteobacterium
1793	0	0	0	0	0	0	0	0	0	0	0	0	0	0	1	0	0	0	0	0	0	0	0	0	0	0	Bacteria; Proteobacteria; Alphaproteobacteria; Rickettsiales; Rickettsiales Incertae Sedis; Candidatus Lariskella; uncultured bacterium
1794	0	0	0	0	0	0	0	0	0	1	1	0	0	0	0	0	0	0	1	0	0	0	0	1	0	0	Bacteria; Proteobacteria; Alphaproteobacteria; Rickettsiales; Rickettsiales Incertae Sedis; Candidatus Lariskella; uncultured bacterium
1795	1	0	0	0	0	0	0	0	0	0	0	0	0	0	0	0	0	0	0	0	0	0	0	0	0	0	Bacteria; Proteobacteria; Alphaproteobacteria; Rickettsiales; Rickettsiales Incertae Sedis; Candidatus Lariskella; uncultured bacterium
1796	0	0	1	0	0	0	1	0	0	0	0	1	0	0	1	0	0	0	0	0	0	0	0	0	0	0	Bacteria; Proteobacteria; Alphaproteobacteria; Rickettsiales; Rickettsiales Incertae Sedis; Candidatus Lariskella; uncultured bacterium
1797	0	0	0	0	0	0	0	0	0	0	0	0	0	0	0	0	0	0	0	0	0	0	0	0	0	1	Bacteria; Proteobacteria; Alphaproteobacteria; Rickettsiales; Rickettsiales Incertae Sedis; Candidatus Lariskella; uncultured bacterium
1798	0	0	0	0	0	2	1	3	0	0	1	0	1	13	153	9	1	0	40	50	18	1	0	0	0	1	Bacteria; Proteobacteria; Alphaproteobacteria; Rickettsiales; Rickettsiales Incertae Sedis; Candidatus Lariskella; uncultured bacterium
1799	0	0	0	0	0	0	0	0	0	0	0	0	0	0	0	0	0	0	1	0	0	0	0	0	0	0	Bacteria; Proteobacteria; Alphaproteobacteria; Rickettsiales; Rickettsiales Incertae Sedis; Candidatus Lariskella; uncultured bacterium
1800	0	0	0	0	0	1	1	0	0	0	0	0	0	0	0	0	1	0	0	0	0	0	0	0	0	0	Bacteria; Proteobacteria; Alphaproteobacteria; Rickettsiales; Rickettsiales Incertae Sedis; Candidatus Lariskella; uncultured bacterium
1801	0	0	0	0	0	0	0	0	0	0	0	0	0	0	0	0	2	0	0	0	0	0	0	0	0	0	Bacteria; Proteobacteria; Alphaproteobacteria; Rickettsiales; Rickettsiales Incertae Sedis; Candidatus Lariskella; uncultured Rickettsiales bacterium
1802	0	0	0	0	0	0	0	0	0	0	0	0	0	0	0	0	0	0	0	0	0	0	0	0	0	1	Bacteria; Proteobacteria; Alphaproteobacteria; Rickettsiales; S25-593; uncultured bacterium
1803	0	0	0	0	0	0	0	0	0	0	0	0	0	0	0	0	0	0	0	0	0	0	0	0	1	0	Bacteria; Proteobacteria; Alphaproteobacteria; Rickettsiales; S25-593; uncultured bacterium
1804	0	0	0	4	0	1	0	0	0	0	3	3	3	0	0	0	0	0	2	1	1	2	1	4	3	1	Bacteria; Proteobacteria; Alphaproteobacteria; Rickettsiales; S25-593; uncultured bacterium
1805	0	0	0	0	0	0	0	0	0	0	0	0	0	0	1	0	0	0	0	0	0	0	0	0	0	0	Bacteria; Proteobacteria; Alphaproteobacteria; Rickettsiales; SAR116 clade; alpha proteobacterium SCGC AAA536-K22
1806	0	0	0	0	0	0	0	0	0	0	0	0	0	0	0	0	0	0	0	0	0	0	1	0	0	0	Bacteria; Proteobacteria; Alphaproteobacteria; Rickettsiales; SAR116 clade; Candidatus Puniceispirillum; uncultured bacterium
1807	0	0	0	0	0	0	0	0	0	0	0	0	0	0	0	0	0	1	0	0	0	0	0	0	0	0	Bacteria; Proteobacteria; Alphaproteobacteria; Rickettsiales; SAR116 clade; Candidatus Puniceispirillum; uncultured bacterium
1808	0	0	0	0	0	0	0	0	0	0	0	0	0	2	0	0	0	0	0	0	0	0	0	0	0	0	Bacteria; Proteobacteria; Alphaproteobacteria; Rickettsiales; SAR116 clade; Candidatus Puniceispirillum; uncultured bacterium
1809	0	0	0	0	0	0	0	0	0	0	0	0	0	0	0	0	0	2	0	0	0	0	0	0	0	0	Bacteria; Proteobacteria; Alphaproteobacteria; Rickettsiales; SAR116 clade; Candidatus Puniceispirillum; uncultured bacterium
1810	10	0	0	0	0	0	0	0	0	1	0	0	1	29	0	0	0	0	0	0	0	9	0	0	0	0	Bacteria; Proteobacteria; Alphaproteobacteria; Rickettsiales; SAR116 clade; Candidatus Puniceispirillum; uncultured bacterium
1811	0	0	0	0	0	0	0	0	0	0	0	0	0	0	0	0	0	0	0	0	0	0	0	0	1	0	Bacteria; Proteobacteria; Alphaproteobacteria; Rickettsiales; SAR116 clade; Candidatus Puniceispirillum; uncultured bacterium
1812	0	0	0	0	0	0	0	0	39	120	49	27	6	0	0	0	0	0	0	0	0	0	0	0	0	0	Bacteria; Proteobacteria; Alphaproteobacteria; Rickettsiales; SAR116 clade; Candidatus Puniceispirillum; uncultured bacterium
1813	0	0	0	0	0	0	0	0	0	0	0	0	0	0	0	0	0	0	0	0	0	0	0	1	0	0	Bacteria; Proteobacteria; Alphaproteobacteria; Rickettsiales; SAR116 clade; Candidatus Puniceispirillum; uncultured bacterium
1814	0	0	0	0	0	0	0	0	0	0	0	0	0	0	0	0	0	0	0	0	0	0	1	0	0	0	Bacteria; Proteobacteria; Alphaproteobacteria; Rickettsiales; SAR116 clade; Candidatus Puniceispirillum; uncultured bacterium
1815	0	0	0	0	0	0	0	0	0	0	0	0	0	4	0	0	0	0	0	0	0	0	0	0	0	0	Bacteria; Proteobacteria; Alphaproteobacteria; Rickettsiales; SAR116 clade; Candidatus Puniceispirillum; uncultured bacterium
1816	0	0	0	0	0	0	0	0	0	0	0	0	0	0	0	0	0	0	0	0	0	0	1	0	0	0	Bacteria; Proteobacteria; Alphaproteobacteria; Rickettsiales; SAR116 clade; Candidatus Puniceispirillum; uncultured bacterium
1817	0	0	0	0	0	0	0	0	0	0	0	0	0	0	0	0	0	0	0	0	0	0	1	0	0	0	Bacteria; Proteobacteria; Alphaproteobacteria; Rickettsiales; SAR116 clade; Candidatus Puniceispirillum; uncultured bacterium
1818	0	0	0	0	0	0	0	0	0	0	0	0	0	0	0	0	0	0	0	0	0	0	1	0	0	0	Bacteria; Proteobacteria; Alphaproteobacteria; Rickettsiales; SAR116 clade; Candidatus Puniceispirillum; uncultured bacterium
1819	0	0	0	0	0	0	0	0	0	0	0	0	0	0	0	0	0	0	0	0	0	0	0	0	0	1	Bacteria; Proteobacteria; Alphaproteobacteria; Rickettsiales; SAR116 clade; Candidatus Puniceispirillum; uncultured bacterium
1820	0	0	0	5	0	4	0	0	0	0	0	0	0	0	0	0	0	0	0	0	0	0	0	0	0	0	Bacteria; Proteobacteria; Alphaproteobacteria; Rickettsiales; SAR116 clade; Candidatus Puniceispirillum; uncultured bacterium
1821	0	0	0	0	0	0	0	0	0	0	0	0	0	0	0	0	0	0	0	0	0	0	0	1	0	0	Bacteria; Proteobacteria; Alphaproteobacteria; Rickettsiales; SAR116 clade; Candidatus Puniceispirillum; uncultured bacterium
1822	0	0	0	0	0	0	0	0	0	0	0	0	0	0	0	0	0	0	1	0	0	0	0	0	0	0	Bacteria; Proteobacteria; Alphaproteobacteria; Rickettsiales; SAR116 clade; Candidatus Puniceispirillum; unidentified marine bacterioplankton
1823	0	0	0	0	0	0	0	0	0	0	0	0	0	7	0	0	0	0	0	0	0	0	0	0	0	0	Bacteria; Proteobacteria; Alphaproteobacteria; Rickettsiales; SAR116 clade; Candidatus Puniceispirillum; unidentified marine bacterioplankton
1824	0	0	0	0	0	0	0	0	0	0	0	0	0	0	0	0	0	0	0	0	1	0	0	0	0	0	Bacteria; Proteobacteria; Alphaproteobacteria; Rickettsiales; SAR116 clade; Candidatus Puniceispirillum; unidentified marine bacterioplankton
1825	0	0	0	0	0	0	0	0	0	0	0	0	0	0	0	0	0	0	1	0	0	0	0	0	0	0	Bacteria; Proteobacteria; Alphaproteobacteria; Rickettsiales; SAR116 clade; Candidatus Puniceispirillum; unidentified marine bacterioplankton
1826	0	0	0	0	0	0	0	0	0	0	0	0	0	0	0	0	0	0	0	0	0	0	0	0	1	0	Bacteria; Proteobacteria; Alphaproteobacteria; Rickettsiales; SAR116 clade; Candidatus Puniceispirillum; unidentified marine bacterioplankton
1827	0	0	0	0	0	0	0	0	0	0	0	0	0	15	0	0	0	0	0	0	0	0	0	0	0	0	Bacteria; Proteobacteria; Alphaproteobacteria; Rickettsiales; SAR116 clade; uncultured alpha proteobacterium
1828	0	0	0	0	0	0	0	0	0	0	0	0	0	0	0	0	0	0	0	0	0	0	1	0	0	0	Bacteria; Proteobacteria; Alphaproteobacteria; Rickettsiales; SAR116 clade; uncultured alpha proteobacterium
1829	0	0	0	0	12	0	0	0	0	0	0	0	0	0	0	0	0	0	0	0	0	0	0	0	0	0	Bacteria; Proteobacteria; Alphaproteobacteria; Rickettsiales; SAR116 clade; uncultured alpha proteobacterium
1830	0	0	0	0	0	0	0	0	0	0	0	0	0	0	0	0	0	0	0	1	0	0	0	0	0	0	Bacteria; Proteobacteria; Alphaproteobacteria; Rickettsiales; SAR116 clade; uncultured alpha proteobacterium
1831	0	3	0	0	0	0	0	0	0	0	0	0	0	151	0	0	0	0	1	0	0	61	0	16	119	0	Bacteria; Proteobacteria; Alphaproteobacteria; Rickettsiales; SAR116 clade; uncultured alpha proteobacterium
1832	0	0	0	0	0	0	0	0	0	0	0	0	0	0	0	0	0	0	0	0	0	0	1	0	0	0	Bacteria; Proteobacteria; Alphaproteobacteria; Rickettsiales; SAR116 clade; uncultured alpha proteobacterium
1833	0	0	0	0	0	0	0	0	0	0	0	0	0	0	1	0	0	0	0	0	0	0	0	0	0	0	Bacteria; Proteobacteria; Alphaproteobacteria; Rickettsiales; SAR116 clade; uncultured alpha proteobacterium
1834	20	1	0	0	0	0	0	0	9	38	0	11	0	0	0	0	0	0	0	0	0	0	0	0	13	0	Bacteria; Proteobacteria; Alphaproteobacteria; Rickettsiales; SAR116 clade; uncultured alpha proteobacterium
1835	0	0	0	0	0	0	0	0	0	0	0	0	0	0	0	0	0	0	0	0	0	0	11	0	0	0	Bacteria; Proteobacteria; Alphaproteobacteria; Rickettsiales; SAR116 clade; uncultured alpha proteobacterium
1836	0	0	0	0	0	0	0	0	0	0	0	0	0	2	0	0	0	0	0	0	0	0	0	0	0	0	Bacteria; Proteobacteria; Alphaproteobacteria; Rickettsiales; SAR116 clade; uncultured alpha proteobacterium
1837	0	0	0	0	0	0	0	0	0	0	0	0	0	0	0	0	0	0	0	0	0	0	1	0	0	1	Bacteria; Proteobacteria; Alphaproteobacteria; Rickettsiales; SAR116 clade; uncultured alpha proteobacterium
1838	0	0	0	0	0	2	3	0	0	0	0	0	0	0	0	0	0	0	9	0	0	0	2	0	0	0	Bacteria; Proteobacteria; Alphaproteobacteria; Rickettsiales; SAR116 clade; uncultured alpha proteobacterium
1839	0	0	0	0	0	0	0	0	0	0	0	0	0	0	0	0	0	0	0	0	2	0	0	0	0	0	Bacteria; Proteobacteria; Alphaproteobacteria; Rickettsiales; SAR116 clade; uncultured alpha proteobacterium
1840	0	0	0	0	0	0	0	0	0	0	0	0	0	1	0	0	0	0	0	0	0	0	0	0	0	0	Bacteria; Proteobacteria; Alphaproteobacteria; Rickettsiales; SAR116 clade; uncultured alpha proteobacterium
1841	0	0	0	0	0	0	0	0	0	0	0	0	0	0	0	0	0	0	0	0	0	0	0	1	1	0	Bacteria; Proteobacteria; Alphaproteobacteria; Rickettsiales; SAR116 clade; uncultured alpha proteobacterium
1842	0	0	0	0	0	0	0	0	0	0	0	0	0	0	0	0	0	0	0	0	0	0	1	0	0	0	Bacteria; Proteobacteria; Alphaproteobacteria; Rickettsiales; SAR116 clade; uncultured alpha proteobacterium
1843	0	0	0	0	0	0	0	0	0	0	0	0	0	0	0	0	0	0	0	0	0	0	0	0	1	0	Bacteria; Proteobacteria; Alphaproteobacteria; Rickettsiales; SAR116 clade; uncultured alpha proteobacterium
1844	36	0	0	0	0	0	0	0	6	0	10	23	0	0	58	0	2	16	28	0	36	1	26	34	58	0	Bacteria; Proteobacteria; Alphaproteobacteria; Rickettsiales; SAR116 clade; uncultured alpha proteobacterium
1845	0	0	0	0	0	0	0	8	0	0	4	1	0	4	11	0	0	0	0	5	0	0	2	0	0	0	Bacteria; Proteobacteria; Alphaproteobacteria; Rickettsiales; SAR116 clade; uncultured alpha proteobacterium
1846	0	0	0	0	0	0	0	0	9	0	14	0	0	391	17	2	0	0	28	16	0	15	0	0	46	0	Bacteria; Proteobacteria; Alphaproteobacteria; Rickettsiales; SAR116 clade; uncultured alpha proteobacterium
1847	0	0	0	0	0	0	0	0	0	0	0	0	0	0	0	0	0	0	0	0	0	0	1	0	0	0	Bacteria; Proteobacteria; Alphaproteobacteria; Rickettsiales; SAR116 clade; uncultured alpha proteobacterium
1848	0	0	0	0	0	0	0	0	0	0	0	0	0	0	0	0	0	0	0	0	0	0	0	0	0	1	Bacteria; Proteobacteria; Alphaproteobacteria; Rickettsiales; SAR116 clade; uncultured alpha proteobacterium
1849	0	0	0	0	0	0	0	0	0	0	0	0	0	0	0	0	0	0	0	0	0	1	0	0	0	0	Bacteria; Proteobacteria; Alphaproteobacteria; Rickettsiales; SAR116 clade; uncultured alpha proteobacterium
1850	0	0	0	0	0	0	0	0	0	0	0	0	0	0	0	0	0	1	0	0	0	0	0	0	0	0	Bacteria; Proteobacteria; Alphaproteobacteria; Rickettsiales; SAR116 clade; uncultured alpha proteobacterium
1851	0	0	0	0	0	0	0	0	0	0	0	0	0	0	1	0	0	0	0	0	0	0	0	0	0	0	Bacteria; Proteobacteria; Alphaproteobacteria; Rickettsiales; SAR116 clade; uncultured alpha proteobacterium
1852	0	0	0	0	0	0	0	0	0	0	0	0	0	0	1	0	0	0	0	0	0	0	0	0	0	0	Bacteria; Proteobacteria; Alphaproteobacteria; Rickettsiales; SAR116 clade; uncultured alpha proteobacterium
1853	0	0	0	0	0	0	0	0	0	0	0	0	0	0	0	0	0	0	1	0	0	0	0	0	0	0	Bacteria; Proteobacteria; Alphaproteobacteria; Rickettsiales; SAR116 clade; uncultured bacterium
1854	0	0	0	0	0	0	0	0	0	0	0	0	0	2	0	0	0	0	0	0	0	0	0	0	0	0	Bacteria; Proteobacteria; Alphaproteobacteria; Rickettsiales; SAR116 clade; uncultured bacterium
1855	0	0	0	0	0	0	0	0	0	0	0	0	0	0	0	0	0	0	0	0	0	0	0	0	3	0	Bacteria; Proteobacteria; Alphaproteobacteria; Rickettsiales; SAR116 clade; uncultured bacterium
1856	0	0	0	0	0	0	0	0	0	0	0	0	0	0	0	0	0	0	0	1	0	0	0	0	0	0	Bacteria; Proteobacteria; Alphaproteobacteria; Rickettsiales; SAR116 clade; uncultured bacterium
1857	0	0	0	0	6	0	0	0	0	0	0	0	0	0	0	0	0	0	0	0	0	0	0	0	0	0	Bacteria; Proteobacteria; Alphaproteobacteria; Rickettsiales; SAR116 clade; uncultured bacterium
1858	0	0	0	0	0	0	0	0	0	0	0	0	0	0	0	0	0	0	0	0	0	25	0	0	0	0	Bacteria; Proteobacteria; Alphaproteobacteria; Rickettsiales; SAR116 clade; uncultured bacterium
1859	0	0	0	0	0	0	0	0	0	0	0	0	0	0	0	0	0	0	0	0	0	0	1	0	0	0	Bacteria; Proteobacteria; Alphaproteobacteria; Rickettsiales; SAR116 clade; uncultured bacterium
1860	0	0	0	0	0	0	0	0	0	0	0	0	0	0	0	0	0	0	0	0	0	0	0	0	1	0	Bacteria; Proteobacteria; Alphaproteobacteria; Rickettsiales; SAR116 clade; uncultured bacterium
1861	0	0	0	0	0	0	0	0	0	0	0	0	0	0	0	0	0	0	0	0	0	0	0	0	4	0	Bacteria; Proteobacteria; Alphaproteobacteria; Rickettsiales; SAR116 clade; uncultured bacterium
1862	0	0	0	0	0	0	0	0	0	0	0	0	0	0	0	0	0	1	0	0	0	0	0	0	0	0	Bacteria; Proteobacteria; Alphaproteobacteria; Rickettsiales; SAR116 clade; uncultured bacterium
1863	0	0	0	0	0	0	0	0	0	0	0	0	0	0	1	0	0	0	0	0	0	0	0	0	0	0	Bacteria; Proteobacteria; Alphaproteobacteria; Rickettsiales; SAR116 clade; uncultured bacterium
1864	0	0	0	1	0	0	0	0	0	0	0	0	0	0	0	0	0	0	0	0	0	0	0	0	0	0	Bacteria; Proteobacteria; Alphaproteobacteria; Rickettsiales; SAR116 clade; uncultured bacterium
1865	0	0	0	0	0	0	1	0	0	0	0	0	0	0	0	0	0	0	0	0	0	78	0	0	0	0	Bacteria; Proteobacteria; Alphaproteobacteria; Rickettsiales; SAR116 clade; uncultured bacterium
1866	0	0	0	0	0	0	0	0	0	0	0	0	0	125	0	0	0	0	0	0	0	0	0	0	51	0	Bacteria; Proteobacteria; Alphaproteobacteria; Rickettsiales; SAR116 clade; uncultured bacterium
1867	0	0	0	0	0	0	0	0	0	0	0	0	0	0	0	0	0	0	0	0	0	0	0	0	3	0	Bacteria; Proteobacteria; Alphaproteobacteria; Rickettsiales; SAR116 clade; uncultured bacterium
1868	0	0	0	0	0	0	0	0	0	0	0	0	0	0	0	0	0	0	0	0	1	0	0	0	0	0	Bacteria; Proteobacteria; Alphaproteobacteria; Rickettsiales; SAR116 clade; uncultured bacterium
1869	0	0	0	0	0	0	0	0	0	0	0	0	0	0	0	0	0	0	0	0	0	0	0	0	0	1	Bacteria; Proteobacteria; Alphaproteobacteria; Rickettsiales; SAR116 clade; uncultured bacterium
1870	0	0	0	0	0	0	0	0	0	0	0	0	0	0	0	0	0	0	16	0	0	0	0	0	0	0	Bacteria; Proteobacteria; Alphaproteobacteria; Rickettsiales; SAR116 clade; uncultured bacterium
1871	0	0	0	0	0	0	0	0	0	0	0	0	0	1	0	0	0	0	0	0	0	0	0	0	0	0	Bacteria; Proteobacteria; Alphaproteobacteria; Rickettsiales; SAR116 clade; uncultured bacterium
1872	0	0	0	0	0	0	0	0	0	0	0	0	0	1	0	0	0	0	0	0	0	0	0	0	0	0	Bacteria; Proteobacteria; Alphaproteobacteria; Rickettsiales; SAR116 clade; uncultured bacterium
1873	0	0	0	0	0	0	0	0	0	0	0	0	0	0	1	0	0	0	0	0	0	0	0	0	0	0	Bacteria; Proteobacteria; Alphaproteobacteria; Rickettsiales; SAR116 clade; uncultured bacterium
1874	0	0	0	0	0	0	0	0	0	0	0	0	0	0	0	0	0	0	0	0	0	0	0	0	1	0	Bacteria; Proteobacteria; Alphaproteobacteria; Rickettsiales; SAR116 clade; uncultured bacterium
1875	0	0	0	0	0	0	0	0	0	0	0	0	0	0	0	0	0	0	0	0	0	0	1	0	0	0	Bacteria; Proteobacteria; Alphaproteobacteria; Rickettsiales; SAR116 clade; uncultured bacterium
1876	0	0	0	0	0	0	0	0	0	0	0	0	0	0	0	0	0	0	1	0	0	0	0	0	0	0	Bacteria; Proteobacteria; Alphaproteobacteria; Rickettsiales; SAR116 clade; uncultured bacterium
1877	0	0	0	0	0	0	0	0	0	0	0	0	0	0	1	0	0	0	0	0	0	0	0	0	0	0	Bacteria; Proteobacteria; Alphaproteobacteria; Rickettsiales; SAR116 clade; uncultured bacterium
1878	0	0	0	0	0	0	0	0	0	0	0	0	0	0	0	0	0	0	0	0	0	1	0	0	0	0	Bacteria; Proteobacteria; Alphaproteobacteria; Rickettsiales; SAR116 clade; uncultured bacterium
1879	0	0	0	0	0	0	0	0	0	0	0	0	0	0	0	0	0	0	0	0	0	1	0	0	0	0	Bacteria; Proteobacteria; Alphaproteobacteria; Rickettsiales; SAR116 clade; uncultured bacterium
1880	0	0	0	0	0	0	0	0	0	0	0	0	0	0	0	0	0	0	0	0	0	0	1	0	0	0	Bacteria; Proteobacteria; Alphaproteobacteria; Rickettsiales; SAR116 clade; uncultured bacterium
1881	0	0	0	0	0	0	0	0	0	0	0	0	0	0	0	0	0	0	0	0	0	0	0	0	0	1	Bacteria; Proteobacteria; Alphaproteobacteria; Rickettsiales; SAR116 clade; uncultured bacterium
1882	0	0	0	0	0	0	0	0	0	0	0	0	0	0	0	0	0	0	0	0	0	0	0	1	0	0	Bacteria; Proteobacteria; Alphaproteobacteria; Rickettsiales; SAR116 clade; uncultured bacterium
1883	0	0	0	0	0	0	0	0	0	0	0	0	0	0	1	0	0	0	0	0	0	0	0	0	0	0	Bacteria; Proteobacteria; Alphaproteobacteria; Rickettsiales; SAR116 clade; uncultured bacterium
1884	8	0	0	0	0	0	0	0	0	0	4	0	0	0	0	0	0	0	0	0	0	10	0	0	0	0	Bacteria; Proteobacteria; Alphaproteobacteria; Rickettsiales; SAR116 clade; uncultured bacterium
1885	0	0	0	0	0	0	0	0	0	0	0	0	0	0	0	0	0	0	0	0	1	0	0	0	0	0	Bacteria; Proteobacteria; Alphaproteobacteria; Rickettsiales; SAR116 clade; uncultured bacterium
1886	0	0	0	0	0	0	0	0	0	0	0	0	0	0	0	0	0	0	0	0	0	0	0	0	0	1	Bacteria; Proteobacteria; Alphaproteobacteria; Rickettsiales; SAR116 clade; uncultured bacterium
1887	0	0	0	0	0	0	0	0	0	0	0	0	0	0	0	0	0	0	0	0	0	0	0	0	0	1	Bacteria; Proteobacteria; Alphaproteobacteria; Rickettsiales; SAR116 clade; uncultured bacterium
1888	0	0	0	0	0	0	0	0	0	0	0	0	0	0	0	0	0	9	0	0	0	0	0	0	0	0	Bacteria; Proteobacteria; Alphaproteobacteria; Rickettsiales; SAR116 clade; uncultured bacterium
1889	0	0	0	0	0	0	0	0	0	0	0	0	0	21	0	0	0	0	0	0	0	0	0	0	0	0	Bacteria; Proteobacteria; Alphaproteobacteria; Rickettsiales; SAR116 clade; uncultured bacterium
1890	0	0	0	0	0	0	1	0	0	0	0	0	0	0	1	0	0	0	0	0	0	0	0	0	0	0	Bacteria; Proteobacteria; Alphaproteobacteria; Rickettsiales; SAR116 clade; uncultured bacterium
1891	0	0	0	0	0	0	0	0	0	0	0	0	0	0	1	0	0	0	0	0	1	0	0	0	0	0	Bacteria; Proteobacteria; Alphaproteobacteria; Rickettsiales; SAR116 clade; uncultured bacterium
1892	0	0	0	0	0	0	0	0	0	0	0	0	0	0	0	0	0	0	0	0	0	1	0	0	0	0	Bacteria; Proteobacteria; Alphaproteobacteria; Rickettsiales; SAR116 clade; uncultured bacterium
1893	0	0	0	0	0	0	0	0	0	0	0	0	0	0	0	0	0	1	0	0	0	0	0	0	0	0	Bacteria; Proteobacteria; Alphaproteobacteria; Rickettsiales; SAR116 clade; uncultured bacterium
1894	0	0	0	0	0	0	1	0	0	0	0	0	0	0	0	0	0	0	0	0	0	13	0	0	0	0	Bacteria; Proteobacteria; Alphaproteobacteria; Rickettsiales; SAR116 clade; uncultured bacterium
1895	0	0	0	0	0	0	16	0	0	1	0	0	0	0	0	0	0	14	0	0	0	0	0	0	4	0	Bacteria; Proteobacteria; Alphaproteobacteria; Rickettsiales; SAR116 clade; uncultured bacterium
1896	0	0	0	0	0	0	0	0	0	0	0	0	0	0	0	0	0	20	0	0	0	0	0	0	0	0	Bacteria; Proteobacteria; Alphaproteobacteria; Rickettsiales; SAR116 clade; uncultured bacterium
1897	0	0	0	1	0	0	0	0	0	0	0	0	0	0	0	0	0	0	0	0	0	0	0	0	0	0	Bacteria; Proteobacteria; Alphaproteobacteria; Rickettsiales; SAR116 clade; uncultured bacterium
1898	0	0	0	0	0	0	0	0	0	0	0	0	0	0	0	0	0	0	0	0	0	0	0	0	1	0	Bacteria; Proteobacteria; Alphaproteobacteria; Rickettsiales; SAR116 clade; uncultured bacterium
1899	0	0	0	0	0	0	0	0	0	0	0	0	0	42	0	0	0	0	0	0	0	0	0	0	0	0	Bacteria; Proteobacteria; Alphaproteobacteria; Rickettsiales; SAR116 clade; uncultured bacterium
1900	0	0	0	0	0	0	0	0	0	0	0	0	0	0	0	0	0	0	0	1	0	0	0	0	0	0	Bacteria; Proteobacteria; Alphaproteobacteria; Rickettsiales; SAR116 clade; uncultured bacterium
1901	0	0	0	0	0	0	0	0	0	0	0	0	0	0	0	0	0	0	0	0	0	0	2	0	0	0	Bacteria; Proteobacteria; Alphaproteobacteria; Rickettsiales; SAR116 clade; uncultured bacterium
1902	0	0	0	0	0	0	0	0	0	0	0	0	0	0	0	0	0	0	0	0	0	0	0	0	1	0	Bacteria; Proteobacteria; Alphaproteobacteria; Rickettsiales; SAR116 clade; uncultured bacterium
1903	0	0	0	0	0	0	0	0	0	0	0	0	0	0	0	0	0	0	0	0	0	0	1	0	0	0	Bacteria; Proteobacteria; Alphaproteobacteria; Rickettsiales; SAR116 clade; uncultured bacterium
1904	0	0	0	0	0	0	0	0	0	0	0	0	0	0	0	0	0	0	0	0	0	0	0	5	0	0	Bacteria; Proteobacteria; Alphaproteobacteria; Rickettsiales; SAR116 clade; uncultured bacterium
1905	0	0	0	0	0	0	0	0	0	0	0	0	0	0	0	0	0	0	0	0	0	0	0	0	0	1	Bacteria; Proteobacteria; Alphaproteobacteria; Rickettsiales; SAR116 clade; uncultured bacterium
1906	0	0	0	0	0	0	0	0	0	0	0	0	0	0	0	0	0	0	0	0	0	0	0	1	0	0	Bacteria; Proteobacteria; Alphaproteobacteria; Rickettsiales; SAR116 clade; uncultured bacterium
1907	0	0	0	0	0	0	0	0	0	0	0	0	0	0	0	0	0	4	0	0	0	0	0	0	0	0	Bacteria; Proteobacteria; Alphaproteobacteria; Rickettsiales; SAR116 clade; uncultured bacterium
1908	46	19	0	0	0	0	0	6	0	0	0	0	0	0	0	0	2	0	22	0	9	0	0	0	1	0	Bacteria; Proteobacteria; Alphaproteobacteria; Rickettsiales; SAR116 clade; uncultured bacterium
1909	0	0	0	0	0	0	0	0	0	0	0	0	0	0	1	0	0	0	0	0	0	0	0	0	0	0	Bacteria; Proteobacteria; Alphaproteobacteria; Rickettsiales; SAR116 clade; uncultured bacterium
1910	0	0	0	0	0	0	0	0	0	0	0	0	0	10	0	0	0	0	0	0	0	0	0	0	0	0	Bacteria; Proteobacteria; Alphaproteobacteria; Rickettsiales; SAR116 clade; uncultured bacterium
1911	0	0	0	0	0	0	0	0	0	0	0	0	0	0	1	0	0	0	0	0	0	0	0	0	0	0	Bacteria; Proteobacteria; Alphaproteobacteria; Rickettsiales; SAR116 clade; uncultured bacterium
1912	0	0	0	0	0	0	0	0	0	0	0	0	0	0	0	0	0	0	0	0	0	0	0	5	0	0	Bacteria; Proteobacteria; Alphaproteobacteria; Rickettsiales; SAR116 clade; uncultured bacterium
1913	0	0	0	0	0	0	0	0	0	0	0	0	0	0	0	0	0	0	0	0	0	0	0	0	0	1	Bacteria; Proteobacteria; Alphaproteobacteria; Rickettsiales; SAR116 clade; uncultured bacterium
1914	0	0	0	0	0	0	0	0	0	0	0	0	0	0	0	0	0	0	0	0	4	0	0	0	0	0	Bacteria; Proteobacteria; Alphaproteobacteria; Rickettsiales; SAR116 clade; uncultured bacterium
1915	0	0	0	0	0	0	0	0	0	0	0	0	0	6	0	0	0	0	0	0	0	0	0	0	1	0	Bacteria; Proteobacteria; Alphaproteobacteria; Rickettsiales; SAR116 clade; uncultured bacterium
1916	0	0	0	0	0	0	0	0	0	0	0	0	0	0	0	0	0	26	0	0	0	0	0	0	0	0	Bacteria; Proteobacteria; Alphaproteobacteria; Rickettsiales; SAR116 clade; uncultured bacterium
1917	0	0	0	0	0	0	0	0	0	0	0	0	0	2	0	0	0	0	0	0	0	0	0	0	0	0	Bacteria; Proteobacteria; Alphaproteobacteria; Rickettsiales; SAR116 clade; uncultured marine bacterium
1918	0	0	0	0	0	0	0	0	0	0	0	0	0	1	0	0	0	0	0	0	0	0	0	0	0	1	Bacteria; Proteobacteria; Alphaproteobacteria; Rickettsiales; SAR116 clade; uncultured marine bacterium
1919	0	0	0	0	0	0	0	0	0	0	0	0	0	0	0	0	0	0	0	0	0	0	0	1	0	0	Bacteria; Proteobacteria; Alphaproteobacteria; Rickettsiales; SAR116 clade; uncultured marine bacterium
1920	0	0	0	0	0	0	0	0	1	0	1	0	0	0	0	0	0	0	0	0	0	0	0	0	0	0	Bacteria; Proteobacteria; Alphaproteobacteria; Rickettsiales; SAR116 clade; uncultured marine bacterium
1921	0	0	0	0	0	0	0	0	0	0	0	0	0	0	0	0	0	0	0	0	0	0	1	0	0	0	Bacteria; Proteobacteria; Alphaproteobacteria; Rickettsiales; SAR116 clade; uncultured marine bacterium
1922	0	0	0	0	0	0	0	0	0	0	0	0	0	0	0	0	0	0	0	0	0	9	0	0	0	0	Bacteria; Proteobacteria; Alphaproteobacteria; Rickettsiales; SAR116 clade; uncultured marine bacterium
1923	0	0	0	0	0	0	0	0	0	0	0	0	0	1	0	0	0	0	0	0	0	0	0	0	0	0	Bacteria; Proteobacteria; Alphaproteobacteria; Rickettsiales; SAR116 clade; uncultured marine bacterium
1924	0	0	0	0	0	0	0	0	0	0	0	0	0	0	1	0	0	0	0	0	0	0	0	0	0	0	Bacteria; Proteobacteria; Alphaproteobacteria; Rickettsiales; SAR116 clade; uncultured marine bacterium
1925	0	0	0	0	0	0	0	0	0	0	0	0	0	0	1	2	14	21	0	0	1	12	0	0	1	0	Bacteria; Proteobacteria; Alphaproteobacteria; Rickettsiales; SAR116 clade; uncultured marine bacterium
1926	0	0	0	0	0	0	0	0	0	0	0	0	0	0	0	0	0	0	0	0	0	0	0	0	6	0	Bacteria; Proteobacteria; Alphaproteobacteria; Rickettsiales; SAR116 clade; uncultured marine bacterium
1927	0	0	0	0	0	1	0	0	0	0	0	0	0	0	0	0	6	0	0	0	0	0	0	0	0	0	Bacteria; Proteobacteria; Alphaproteobacteria; Rickettsiales; SAR116 clade; uncultured marine bacterium
1928	0	0	0	0	0	0	0	0	0	0	0	0	0	0	0	0	0	0	1	0	0	0	5	0	0	2	Bacteria; Proteobacteria; Alphaproteobacteria; Rickettsiales; SAR116 clade; uncultured marine bacterium
1929	0	0	0	0	0	0	0	0	0	0	0	0	0	8	0	0	0	0	0	0	0	0	0	0	0	0	Bacteria; Proteobacteria; Alphaproteobacteria; Rickettsiales; SAR116 clade; uncultured marine bacterium
1930	0	0	0	0	0	0	0	0	0	0	0	0	0	24	0	0	6	0	0	0	0	0	1	0	0	25	Bacteria; Proteobacteria; Alphaproteobacteria; Rickettsiales; SAR116 clade; uncultured marine bacterium
1931	0	0	0	0	0	0	0	0	0	0	0	0	0	3	0	0	0	0	0	0	0	0	0	0	0	0	Bacteria; Proteobacteria; Alphaproteobacteria; Rickettsiales; SAR116 clade; uncultured marine bacterium
1932	0	0	0	0	0	0	0	0	0	0	0	0	0	0	0	0	0	0	0	0	0	0	1	0	0	0	Bacteria; Proteobacteria; Alphaproteobacteria; Rickettsiales; SAR116 clade; uncultured marine bacterium
1933	0	0	0	0	0	0	0	0	0	0	0	0	0	0	0	0	0	0	0	1	0	0	0	0	0	0	Bacteria; Proteobacteria; Alphaproteobacteria; Rickettsiales; SAR116 clade; uncultured marine bacterium
1934	0	0	0	0	0	0	0	0	0	0	0	0	0	0	0	0	0	0	0	1	0	0	0	0	0	0	Bacteria; Proteobacteria; Alphaproteobacteria; Rickettsiales; SAR116 clade; uncultured marine bacterium
1935	0	0	0	0	0	0	0	0	0	0	0	0	0	0	1	0	0	0	0	0	0	0	0	0	0	0	Bacteria; Proteobacteria; Alphaproteobacteria; Rickettsiales; SAR116 clade; uncultured marine bacterium
1936	0	0	0	0	0	0	0	0	0	0	0	0	0	0	3	0	0	0	0	1	0	0	1	0	0	6	Bacteria; Proteobacteria; Alphaproteobacteria; Rickettsiales; SAR116 clade; uncultured marine bacterium
1937	0	0	0	0	0	0	0	0	0	0	0	0	0	0	0	0	0	0	0	0	0	0	0	0	0	1	Bacteria; Proteobacteria; Alphaproteobacteria; Rickettsiales; SAR116 clade; uncultured marine bacterium
1938	0	0	0	0	0	0	0	0	0	0	0	0	0	0	0	0	0	0	0	1	0	0	0	0	0	0	Bacteria; Proteobacteria; Alphaproteobacteria; Rickettsiales; SAR116 clade; uncultured marine bacterium
1939	0	0	0	0	0	0	0	9	0	0	0	0	0	47	0	0	0	12	0	0	0	0	0	0	0	0	Bacteria; Proteobacteria; Alphaproteobacteria; Rickettsiales; SAR116 clade; uncultured marine bacterium
1940	0	0	0	0	0	0	10	0	0	0	0	0	0	0	0	0	0	0	11	0	18	40	0	0	0	1	Bacteria; Proteobacteria; Alphaproteobacteria; Rickettsiales; SAR116 clade; uncultured marine bacterium
1941	653	17	50	558	258	127	19	131	546	591	330	421	549	770	168	58	11	520	360	482	269	808	506	798	839	341	Bacteria; Proteobacteria; Alphaproteobacteria; Rickettsiales; SAR116 clade; uncultured marine bacterium
1942	0	0	0	0	0	0	0	0	0	0	0	0	0	0	0	0	0	0	0	0	0	0	1	0	0	0	Bacteria; Proteobacteria; Alphaproteobacteria; Rickettsiales; SAR116 clade; uncultured marine bacterium
1943	0	0	0	0	0	0	0	0	0	0	0	0	0	0	0	0	0	3	0	0	0	0	0	0	0	0	Bacteria; Proteobacteria; Alphaproteobacteria; Rickettsiales; SAR116 clade; uncultured marine bacterium
1944	0	0	0	0	0	0	0	0	0	0	0	0	0	0	1	6	11	0	0	1	0	11	0	1	2	0	Bacteria; Proteobacteria; Alphaproteobacteria; Rickettsiales; SAR116 clade; uncultured marine bacterium
1945	0	0	0	0	0	0	0	0	0	0	0	0	0	0	0	0	0	0	0	0	0	0	1	0	0	0	Bacteria; Proteobacteria; Alphaproteobacteria; Rickettsiales; SAR116 clade; uncultured marine bacterium
1946	0	0	0	0	0	0	0	0	0	0	0	0	0	0	0	0	0	0	10	0	0	0	0	0	0	0	Bacteria; Proteobacteria; Alphaproteobacteria; Rickettsiales; SAR116 clade; uncultured marine bacterium
1947	690	85	256	606	455	177	113	192	1315	1449	992	693	418	1239	153	299	13	1610	997	1018	639	1074	963	1712	1503	280	Bacteria; Proteobacteria; Alphaproteobacteria; Rickettsiales; SAR116 clade; uncultured marine bacterium
1948	0	0	0	0	0	0	0	0	0	0	0	0	0	0	0	0	0	0	0	0	0	0	1	0	0	0	Bacteria; Proteobacteria; Alphaproteobacteria; Rickettsiales; SAR116 clade; uncultured marine bacterium
1949	0	0	0	0	0	0	0	0	0	0	0	0	0	0	0	0	0	0	0	0	0	0	0	0	1	0	Bacteria; Proteobacteria; Alphaproteobacteria; Rickettsiales; SAR116 clade; uncultured marine bacterium
1950	0	0	0	0	0	0	0	0	0	0	0	0	0	0	1	0	0	0	0	0	0	0	0	0	0	0	Bacteria; Proteobacteria; Alphaproteobacteria; Rickettsiales; SAR116 clade; uncultured marine microorganism
1951	0	0	0	0	0	0	0	0	0	0	0	0	0	0	0	0	0	0	0	0	0	2	0	0	0	0	Bacteria; Proteobacteria; Alphaproteobacteria; Rickettsiales; SAR116 clade; uncultured marine microorganism
1952	0	0	0	0	0	0	0	0	0	0	0	0	0	6	0	0	0	0	0	0	0	0	0	0	0	0	Bacteria; Proteobacteria; Alphaproteobacteria; Rickettsiales; SAR116 clade; uncultured marine microorganism
1953	0	0	0	0	0	0	0	0	0	0	0	0	0	0	0	0	0	0	0	0	0	0	0	0	1	0	Bacteria; Proteobacteria; Alphaproteobacteria; Rickettsiales; SAR116 clade; uncultured marine microorganism
1954	0	0	0	0	0	0	0	0	0	0	0	0	0	0	0	0	0	0	0	0	0	4	0	0	9	15	Bacteria; Proteobacteria; Alphaproteobacteria; Rickettsiales; SAR116 clade; uncultured proteobacterium OCS28
1955	0	0	0	0	0	0	0	0	0	0	0	0	0	0	0	0	0	0	0	0	0	0	0	0	0	1	Bacteria; Proteobacteria; Alphaproteobacteria; Rickettsiales; SAR116 clade; uncultured proteobacterium OCS28
1956	0	0	0	0	0	0	0	0	0	0	0	0	0	0	0	0	0	0	0	0	0	0	1	0	0	0	Bacteria; Proteobacteria; Alphaproteobacteria; Rickettsiales; SAR116 clade; uncultured Rhodospirillaceae bacterium
1957	267	12	76	141	0	22	28	0	122	52	11	22	112	628	100	71	8	237	226	230	185	112	50	232	232	98	Bacteria; Proteobacteria; Alphaproteobacteria; Rickettsiales; SAR116 clade; uncultured SAR116 cluster alpha proteobacterium
1958	0	0	0	0	54	11	0	26	0	0	86	67	0	0	0	0	3	0	0	0	0	0	0	0	0	0	Bacteria; Proteobacteria; Alphaproteobacteria; Rickettsiales; SAR116 clade; uncultured SAR116 cluster alpha proteobacterium
1959	0	0	0	0	0	0	0	0	0	0	0	0	0	0	0	0	0	0	0	0	0	0	0	0	0	1	Bacteria; Proteobacteria; Alphaproteobacteria; Rickettsiales; SAR116 clade; uncultured SAR116 cluster alpha proteobacterium
1960	0	0	0	0	13	0	0	0	0	0	0	0	0	0	0	0	0	0	0	0	0	0	0	0	0	0	Bacteria; Proteobacteria; Alphaproteobacteria; Rickettsiales; SAR116 clade; uncultured SAR116 cluster alpha proteobacterium
1961	0	0	0	0	0	0	0	0	0	0	0	0	0	0	0	0	0	0	0	0	0	0	0	0	0	3	Bacteria; Proteobacteria; Alphaproteobacteria; Rickettsiales; SAR116 clade; uncultured SAR116 cluster alpha proteobacterium
1962	0	0	0	0	0	0	0	0	0	0	0	0	0	0	0	0	0	4	0	0	0	0	0	0	0	0	Bacteria; Proteobacteria; Alphaproteobacteria; Rickettsiales; SAR116 clade; uncultured SAR116 cluster alpha proteobacterium
1963	0	0	0	0	0	0	0	0	0	0	0	0	0	0	0	0	0	30	0	0	0	0	0	0	0	0	Bacteria; Proteobacteria; Alphaproteobacteria; Rickettsiales; SAR116 clade; uncultured SAR116 cluster alpha proteobacterium
1964	0	0	0	0	0	0	0	0	0	0	0	0	0	0	0	0	0	0	0	0	0	0	0	0	0	1	Bacteria; Proteobacteria; Alphaproteobacteria; Rickettsiales; SAR116 clade; uncultured SAR116 cluster alpha proteobacterium
1965	0	0	0	0	0	0	0	0	0	0	0	0	0	0	0	0	0	0	0	0	0	0	1	0	0	2	Bacteria; Proteobacteria; Alphaproteobacteria; Rickettsiales; SAR116 clade; uncultured SAR116 cluster alpha proteobacterium
1966	0	0	0	0	0	0	0	0	0	0	0	0	0	0	0	0	5	0	3	0	6	1	0	1	2	0	Bacteria; Proteobacteria; Alphaproteobacteria; Rickettsiales; SAR116 clade; uncultured SAR116 cluster alpha proteobacterium
1967	2	0	0	0	0	0	0	0	0	10	0	0	0	0	0	0	0	0	0	0	0	0	0	0	0	0	Bacteria; Proteobacteria; Alphaproteobacteria; Rickettsiales; SAR116 clade; unidentified marine bacterioplankton
1968	0	0	0	0	0	0	0	0	0	0	0	0	0	0	0	0	0	0	0	0	0	0	0	0	1	0	Bacteria; Proteobacteria; Alphaproteobacteria; Rickettsiales; SAR116 clade; unidentified marine bacterioplankton
1969	0	0	0	0	0	0	0	0	0	0	0	0	0	0	0	0	0	0	1	0	0	0	0	0	0	0	Bacteria; Proteobacteria; Alphaproteobacteria; Rickettsiales; SAR116 clade; unidentified marine bacterioplankton
1970	0	0	0	0	16	0	0	10	0	6	0	0	0	0	0	0	0	0	0	0	0	0	0	0	7	0	Bacteria; Proteobacteria; Alphaproteobacteria; Rickettsiales; SAR116 clade; unidentified marine bacterioplankton
1971	0	0	0	0	0	6	0	7	8	23	13	6	1	65	1	0	0	56	41	22	18	9	44	34	1	0	Bacteria; Proteobacteria; Alphaproteobacteria; Rickettsiales; SAR116 clade; unidentified marine bacterioplankton
1972	0	0	0	0	0	0	0	0	0	0	0	0	0	0	0	0	0	1	0	0	0	0	1	0	0	0	Bacteria; Proteobacteria; Alphaproteobacteria; Rickettsiales; SHWN-night2; uncultured alpha proteobacterium
1973	0	0	0	0	0	0	0	0	0	0	0	0	0	0	0	0	0	0	0	0	0	0	0	0	1	0	Bacteria; Proteobacteria; Alphaproteobacteria; Rickettsiales; SHWN-night2; uncultured alpha proteobacterium
1974	0	0	0	0	0	0	0	0	0	0	0	0	0	0	0	0	0	1	0	0	0	0	0	0	1	0	Bacteria; Proteobacteria; Alphaproteobacteria; Rickettsiales; SHWN-night2; uncultured alpha proteobacterium
1975	0	0	0	0	0	0	0	0	0	0	0	0	0	0	0	1	0	0	0	0	0	0	0	0	0	0	Bacteria; Proteobacteria; Alphaproteobacteria; Rickettsiales; SHWN-night2; uncultured alpha proteobacterium
1976	1	0	0	12	3	4	0	11	1	41	18	8	1	13	1	1	0	1	39	22	20	13	70	25	13	13	Bacteria; Proteobacteria; Alphaproteobacteria; Rickettsiales; SHWN-night2; uncultured alpha proteobacterium
1977	0	0	0	0	0	0	0	0	0	0	0	0	0	0	0	0	0	1	0	0	0	0	0	0	0	0	Bacteria; Proteobacteria; Alphaproteobacteria; Rickettsiales; SHWN-night2; uncultured alpha proteobacterium
1978	0	0	0	0	0	0	0	0	0	0	0	0	0	0	0	0	0	0	0	0	0	0	1	0	0	0	Bacteria; Proteobacteria; Alphaproteobacteria; Rickettsiales; SHWN-night2; uncultured alpha proteobacterium
1979	0	0	0	0	0	0	0	0	0	0	0	0	0	0	0	0	0	0	2	0	0	0	0	0	0	0	Bacteria; Proteobacteria; Alphaproteobacteria; Rickettsiales; SHWN-night2; uncultured alpha proteobacterium
1980	0	0	0	0	0	0	0	0	0	0	0	0	0	0	0	0	0	0	0	0	0	0	1	0	0	0	Bacteria; Proteobacteria; Alphaproteobacteria; Rickettsiales; SHWN-night2; uncultured alpha proteobacterium
1981	0	0	0	0	0	1	0	0	0	0	0	0	0	0	0	0	0	0	0	0	0	0	0	0	0	0	Bacteria; Proteobacteria; Alphaproteobacteria; Rickettsiales; SHWN-night2; uncultured alpha proteobacterium
1982	0	0	0	0	0	0	0	0	0	0	0	0	0	0	0	0	0	0	0	0	0	0	1	0	0	1	Bacteria; Proteobacteria; Alphaproteobacteria; Rickettsiales; SHWN-night2; uncultured alpha proteobacterium
1983	0	0	0	0	0	0	0	0	0	0	0	0	0	0	0	0	0	1	0	0	0	0	0	0	0	0	Bacteria; Proteobacteria; Alphaproteobacteria; Rickettsiales; SHWN-night2; uncultured alpha proteobacterium
1984	0	0	0	0	0	0	0	0	0	1	0	0	0	2	0	0	0	1	3	0	0	0	0	0	0	0	Bacteria; Proteobacteria; Alphaproteobacteria; Rickettsiales; SHWN-night2; uncultured alpha proteobacterium
1985	0	0	0	0	0	0	0	0	0	0	0	0	0	0	0	0	0	0	1	0	0	0	0	0	0	0	Bacteria; Proteobacteria; Alphaproteobacteria; Rickettsiales; SM2D12; uncultured bacterium
1986	0	0	0	0	0	0	0	0	0	0	0	0	0	0	0	0	0	0	0	0	0	0	0	0	2	0	Bacteria; Proteobacteria; Alphaproteobacteria; Rickettsiales; SM2D12; uncultured bacterium
1987	0	0	0	0	0	1	0	0	0	0	0	0	0	0	0	0	0	0	0	0	0	0	0	0	0	0	Bacteria; Proteobacteria; Alphaproteobacteria; Rickettsiales; SM2D12; uncultured bacterium
1988	0	0	0	0	0	0	0	0	0	0	0	0	0	0	0	0	0	0	0	0	1	0	0	0	0	0	Bacteria; Proteobacteria; Alphaproteobacteria; Rickettsiales; SM2D12; uncultured bacterium
1989	0	0	0	0	0	1	0	0	0	0	0	0	0	0	0	0	0	0	0	0	0	0	0	0	0	0	Bacteria; Proteobacteria; Alphaproteobacteria; Rickettsiales; SM2D12; uncultured organism
1990	0	0	0	0	0	0	0	0	0	0	0	0	0	1	0	0	0	0	0	0	0	0	0	0	2	0	Bacteria; Proteobacteria; Alphaproteobacteria; Rickettsiales; T9d; uncultured alpha proteobacterium
1991	0	0	0	0	0	0	0	0	0	0	0	0	0	0	0	0	0	0	0	0	0	0	0	0	0	1	Bacteria; Proteobacteria; Alphaproteobacteria; Rickettsiales; T9d; uncultured bacterium
1992	0	0	0	3	0	0	0	0	0	0	10	1	1	0	0	0	0	0	1	4	2	0	7	12	2	0	Bacteria; Proteobacteria; Alphaproteobacteria; Rickettsiales; T9d; uncultured bacterium
1993	0	0	0	0	0	0	0	0	0	0	0	0	0	0	0	0	0	0	1	0	0	0	0	0	0	0	Bacteria; Proteobacteria; Alphaproteobacteria; Rickettsiales; T9d; uncultured bacterium
1994	0	0	0	0	0	0	0	0	0	1	1	2	0	0	0	0	0	0	2	1	0	0	0	1	4	0	Bacteria; Proteobacteria; Alphaproteobacteria; Rickettsiales; T9d; uncultured Rhodospirillales bacterium
1995	0	0	0	0	0	0	0	0	0	0	0	0	1	0	0	0	0	0	0	0	0	0	0	0	0	0	Bacteria; Proteobacteria; Alphaproteobacteria; SAR11 clade; Chesapeake-Delaware Bay; uncultured SAR11 cluster alpha proteobacterium
1996	0	0	0	0	6	0	0	0	0	2	0	0	1	0	0	0	0	0	0	0	0	0	0	0	0	0	Bacteria; Proteobacteria; Alphaproteobacteria; SAR11 clade; Chesapeake-Delaware Bay; uncultured SAR11 cluster alpha proteobacterium
[truncated: 895 more rows]
