# Supplementary material for: Linking Compositional and Functional Predictions to Decipher the Biogeochemical Significance in DFAA Turnover of Abundant Bacterioplankton Lineages in the North Sea
Source: Microorganisms. 2017 Nov 5;5(4):68. doi: 10.3390/microorganisms5040068 (PMC5748577; doi:10.3390/microorganisms5040068)
Supplement: Supplementary file 1 [file microorganisms-05-00068-s001.zip › Table_S4.XLS]

## Sheet: reduced_OCTcluster_SB
Table S4. Reclassified sequences of the Roseobacter OCT lineage.
Accession in (silva)	Reclassified as
AF245615.1.1415	CHAB-I-5 cluster
DQ395672.1.1461	NAC11-6 cluster
DQ395765.1.1460	CHAB-I-5 cluster
DQ395796.1.1462	NAC11-6 cluster
FJ545521.1.1458	NAC11-6 cluster
FJ545522.1.1454	CHAB-I-5 cluster
FJ545591.1.1459	NAC11-6 cluster
FJ745272.1.1297	CHAB-I-5 cluster
FJ825934.1.1419	CHAB-I-5 cluster
FJ826501.1.1417	CHAB-I-5 cluster
FR683592.1.1428	NAC11-6 cluster
GQ347921.1.1306	CHAB-I-5 cluster
GU234780.1.1298	NAC11-6 cluster
GU235644.1.1296	NAC11-6 cluster
HQ203796.1.1427	NAC11-6 cluster
HQ242021.1.1311	CHAB-I-5 cluster
HQ242201.1.1427	CHAB-I-5 cluster
HQ242215.1.1421	CHAB-I-5 cluster
JQ199231.1.1283	CHAB-I-5 cluster
JQ199339.1.1283	CHAB-I-5 cluster
JQ199548.1.1286	NAC11-6 cluster
JX529563.1.1368	NAC11-6 cluster
