# Supplementary material for: Linking Compositional and Functional Predictions to Decipher the Biogeochemical Significance in DFAA Turnover of Abundant Bacterioplankton Lineages in the North Sea
Source: Microorganisms. 2017 Nov 5;5(4):68. doi: 10.3390/microorganisms5040068 (PMC5748577; doi:10.3390/microorganisms5040068)
Supplement: Supplementary file 1 [file microorganisms-05-00068-s001.zip › Table_S5.XLS]

## Sheet: Tabelle1
Table S5. Alpha diversity values at 3% genetic distance and calculated at the same surveying effort (number of sequences = 6397). Every value was calculated 10 times in qiime. The average of all 10 iterations is provided.
Site	Richness	Michaelis-Menten-Fit	Coverage (%)
	0.03	0.03	0.03
	Entire community (DNA-based)
1	166.2	188.6	88.1
2	140.3	160.7	87.3
3	113.7	120.7	94.2
6	241.9	269	89.9
7	150.2	164.6	91.2
8	191.6	213	89.9
10	NA	NA	NA
11	196.8	219.4	89.7
12	185.7	209.6	88.6
13	204.3	229.4	89
14	247.2	282.8	87.4
15	202.3	229.3	88.2
16	203.7	222.8	91.4
AVG	187	209.2	89.4
SD	39.2	45.4	-
	Active community (RNA-based)
1	232.2	276	84.1
2	426	649.4	65.6
3	151.8	172.3	88.1
6	NA	NA	NA
7	222.3	266.5	83.4
8	231.6	272.7	84.9
10	225.1	260	86.6
11	201.5	235.3	85.6
12	195.4	221.2	88.3
13	295.2	413.7	71.4
14	172	203.6	84.5
15	272.6	364.9	74.7
16	365.8	517.1	70.7
AVG	249.3	321.1	77.6
SD	79.8	141.8	-
(*) Shannon values were calculated on base 2 logarithm.
Abbreviations: AVG, average; SD, standard deviation; NA, not available.
