# Supplementary material for: Linking Compositional and Functional Predictions to Decipher the Biogeochemical Significance in DFAA Turnover of Abundant Bacterioplankton Lineages in the North Sea
Source: Microorganisms. 2017 Nov 5;5(4):68. doi: 10.3390/microorganisms5040068 (PMC5748577; doi:10.3390/microorganisms5040068)
Supplement: Supplementary file 1 [file microorganisms-05-00068-s001.zip › Table_S6.XLS]

## Sheet: Table S6
Table S6. Relative abundances of KEGG pathways predicted from obtained 16S rRNA data. Correlations between DFAA turnover and pathway abundance were tested by Spearman rank correlation using cor.test() in R. P values were corrected for multiple comparisons according to Benjamini and Hochberg (1995).
KEGG Pathway	Entire bacteriokplankton community													Active bacterioplankton community													Pathway	P corrected
	1	2	3	6	7	8	10	11	12	13	14	15	16	1	2	3	6	7	8	10	11	12	13	14	15	16		Entire community	Active community
ko00010	0.00805047	0.0085814	0.00865488	0.00791112	0.00787598	0.00831997	0.00823475	0.00846646	0.00790498	0.00787014	0.00772529	0.00789509	0.0079984	0.00813673	0.00838162	0.0086608	0.00863819	0.00803817	0.00849776	0.00850248	0.00854161	0.00820031	0.00821718	0.00793928	0.00792628	0.00798025	Glycolysis / Gluconeogenesis	0.0165003	0.0172291
ko00020	0.00666671	0.00723332	0.00709704	0.00625296	0.00522477	0.00701806	0.00671161	0.00704124	0.00612097	0.00597436	0.00567146	0.00557091	0.00629993	0.00647886	0.0071253	0.00676728	0.00667928	0.00577872	0.00692402	0.00669597	0.00686822	0.00618265	0.00627112	0.00592898	0.00563579	0.00615676	Citrate cycle (TCA cycle)	0.0165003	0.0145854
ko00030	0.00882124	0.00875047	0.00890212	0.00890305	0.00941359	0.00870513	0.00904661	0.00878163	0.00881754	0.00895102	0.00903439	0.00910213	0.00886726	0.00912874	0.00862559	0.0093071	0.0092267	0.00932214	0.00910345	0.00923752	0.00909595	0.0091798	0.00915821	0.00925454	0.00935048	0.009179	Pentose phosphate pathway	0.274267	0.444097
ko00040	0.00650299	0.00614129	0.00651595	0.00635143	0.00484453	0.00589588	0.00655394	0.00619546	0.00575072	0.00600582	0.00558425	0.00501398	0.00617296	0.00641828	0.00548083	0.00631334	0.00609056	0.00570272	0.00657798	0.00623967	0.00640299	0.00588003	0.00612985	0.00608145	0.00564919	0.00623914	Pentose and glucuronate interconversions	0.0206161	0.553041
ko00051	0.0140286	0.0153981	0.0153108	0.0135227	0.0135558	0.0147445	0.0143419	0.0149876	0.0141255	0.0136492	0.013232	0.0137823	0.0136192	0.0134954	0.0139687	0.0145132	0.0143332	0.0136076	0.0149988	0.0143985	0.0148307	0.0141354	0.0140591	0.0132285	0.0132242	0.0136761	Fructose and mannose metabolism	0.0310987	0.146828
ko00052	0.00457076	0.00446967	0.0048207	0.00459315	0.00405116	0.00454676	0.00454939	0.00454761	0.00457072	0.00465537	0.00435526	0.00420671	0.00455175	0.00461148	0.00459653	0.0047404	0.00464477	0.00447572	0.00491598	0.00462395	0.00475861	0.00464624	0.00477507	0.00448322	0.00432942	0.00457578	Galactose metabolism	0.230679	0.320784
ko00053	0.00220977	0.00249509	0.00263493	0.00200514	0.00166594	0.00260781	0.0025586	0.00247003	0.00169355	0.00179175	0.00167359	0.00162085	0.0020054	0.00223836	0.00232259	0.00258569	0.00244735	0.00186991	0.00248313	0.00239935	0.00237804	0.00196766	0.00209796	0.00194791	0.00185654	0.00209817	Ascorbate and aldarate metabolism	0.0184412	0.0139139
ko00061	0.00957135	0.0108027	0.0103794	0.00901798	0.00805782	0.0102907	0.00981427	0.0104307	0.00907673	0.00867222	0.00835561	0.00855313	0.00916205	0.00925028	0.0102896	0.009867	0.00990889	0.00856125	0.0102661	0.00994215	0.0102082	0.00915374	0.00913253	0.00859269	0.00834936	0.00889339	Fatty acid biosynthesis	0.0184412	0.0172291
ko00062	3.04e-05	2.74e-05	2.83e-05	2.21e-05	1.75e-05	2.84e-05	2.93e-05	2.74e-05	2.27e-05	2.47e-05	2.23e-05	1.82e-05	2.19e-05	4.35e-05	2.92e-05	4.56e-05	4.63e-05	3.37e-05	3.6e-05	4.32e-05	4.09e-05	3.5e-05	3.44e-05	3.75e-05	3.46e-05	2.91e-05	Fatty acid elongation	0.0526799	0.132105
ko00071	0.00377767	0.00399243	0.00386286	0.00312637	0.00255872	0.00394405	0.00376359	0.00387046	0.00317452	0.00320851	0.00295295	0.00272656	0.00312463	0.00373946	0.00378153	0.00386373	0.00379093	0.00313531	0.0036981	0.00376976	0.00373276	0.00336006	0.00343506	0.00336799	0.0031162	0.00322047	Fatty acid metabolism	0.0231007	0.00619055
ko00072	0.000831122	0.000877754	0.000860838	0.000671115	0.000506123	0.00083029	0.00080441	0.000835591	0.000670614	0.000677597	0.000612229	0.000551478	0.000667302	0.000807476	0.000791554	0.000849569	0.000817789	0.000654836	0.000782272	0.000805751	0.000801765	0.000711602	0.000728459	0.000715851	0.000646815	0.000684694	Synthesis and degradation of ketone bodies	0.0165003	0.0104264
ko00100	0.000159145	0.000237893	0.000214237	0.000126251	0.0001065	0.000230046	0.000200661	0.000216027	0.000137852	0.000121509	9.71e-05	0.00012362	0.000137211	0.000144012	0.000346803	0.000188092	0.000203706	0.000124104	0.000219258	0.00020142	0.000199568	0.000154407	0.000163907	0.000108736	0.000105865	0.000134974	Steroid biosynthesis	0.0183047	0.0172291
ko00120	7.36e-05	8.41e-05	9.11e-05	6.92e-05	6.79e-05	0.000107398	9.35e-05	8.78e-05	4.82e-05	5.45e-05	5.95e-05	5.82e-05	6.8e-05	9.84e-05	0.000104	0.000118992	0.000111623	8.24e-05	0.000101086	0.000106219	9.88e-05	8.19e-05	8.86e-05	8.79e-05	8.56e-05	9.44e-05	Primary bile acid biosynthesis	0.0331847	0.00678175
ko00121	2.58e-05	2.82e-05	3.26e-05	3.99e-05	4.36e-05	3.4e-05	3.04e-05	3.35e-05	2.36e-05	2.61e-05	3.39e-05	3.56e-05	3.75e-05	3.04e-05	4.85e-05	3.91e-05	3.6e-05	3.76e-05	3.18e-05	3.3e-05	2.93e-05	3.42e-05	3.65e-05	3.63e-05	3.9e-05	5.1e-05	Secondary bile acid biosynthesis	0.474426	0.871112
ko00130	0.00726364	0.00780141	0.00768389	0.00843886	0.01112	0.00819006	0.00788881	0.00782655	0.0088387	0.0084919	0.00936879	0.01046	0.0085557	0.00710542	0.00824879	0.00738159	0.00746711	0.00898114	0.00779751	0.00760774	0.00758477	0.00839519	0.00805666	0.00806165	0.00898739	0.00850935	Ubiquinone and other terpenoid-quinone biosynthesis	0.0165003	0.0540066
ko00140	0.00122435	0.00130959	0.00132166	0.00131069	0.000805015	0.00135667	0.00151725	0.00130648	0.000990675	0.000991778	0.000939479	0.000844546	0.00125869	0.00116551	0.00116114	0.00117329	0.00109417	0.000964226	0.0015719	0.00126806	0.00137249	0.00102848	0.00112857	0.00104	0.000938231	0.00128161	Steroid hormone biosynthesis	0.0165003	0.300973
ko00190	0.017205	0.0171757	0.0174064	0.0191656	0.0212087	0.0175512	0.0177871	0.0173894	0.0185732	0.0184807	0.0195766	0.0204203	0.0193002	0.0177434	0.018452	0.0178438	0.0178724	0.0194366	0.0179183	0.0179204	0.0177769	0.018659	0.0184249	0.01863	0.0195404	0.0192693	Oxidative phosphorylation	0.0194297	0.0540066
ko00195	0.00284447	0.00286661	0.00288733	0.00617526	0.016075	0.00398232	0.00415406	0.00335865	0.00803143	0.0075737	0.0103282	0.013429	0.00633809	0.00285042	0.00338537	0.00300677	0.00362945	0.00916415	0.00330796	0.00373534	0.00322046	0.00680261	0.0056911	0.0065703	0.00953671	0.00659132	Photosynthesis	0.0165003	0.0292975
ko00196	2.45e-05	1.2e-05	1.34e-05	0.00105111	0.00422063	0.00036965	0.000447904	0.000160312	0.00163631	0.00150091	0.00239148	0.00335679	0.00108913	3.58e-05	0.000117019	7.89e-05	0.000303308	0.00237705	0.000152724	0.000343755	0.000133431	0.00146938	0.00104972	0.00143858	0.00254016	0.0014213	Photosynthesis - antenna proteins	0.0165003	0.015475
ko00230	0.0348685	0.0356784	0.0352078	0.0356035	0.036069	0.0345734	0.0351994	0.035334	0.035224	0.0348843	0.0354303	0.0359463	0.0357595	0.0346467	0.034535	0.0347641	0.0350012	0.035126	0.0351689	0.035165	0.0352802	0.0349753	0.0346764	0.0349029	0.0351917	0.0351464	Purine metabolism	0.390572	0.575749
ko00232	0.00028995	0.000235946	0.000229707	0.000227891	0.000170675	0.000190005	0.000243982	0.000228905	0.000235191	0.000256712	0.000231908	0.000183162	0.00021771	0.000270172	0.000188723	0.000224599	0.000234462	0.000223165	0.000193388	0.000227864	0.000213898	0.000224049	0.000226453	0.000263421	0.000234802	0.000209824	Caffeine metabolism	0.422863	0.825431
ko00240	0.0230565	0.0235168	0.0233355	0.0241494	0.0247206	0.0231024	0.0231435	0.0234571	0.0242469	0.0238608	0.0241846	0.0248156	0.0242934	0.0227895	0.0235817	0.0227549	0.0230726	0.0236674	0.023573	0.0231444	0.0234326	0.0236212	0.0233774	0.0231522	0.0235281	0.0234213	Pyrimidine metabolism	0.0432809	0.240024
ko00250	0.0115184	0.0117293	0.0116639	0.0118744	0.0118462	0.0117188	0.0113913	0.0117868	0.0119854	0.0117143	0.0118347	0.0120123	0.0119438	0.0112519	0.0114924	0.0113137	0.011282	0.0114678	0.0115221	0.0113259	0.0115302	0.0115994	0.0114805	0.0113102	0.0113619	0.0115377	Alanine, aspartate and glutamate metabolism	0.133308	0.421587
ko00253	0.000533304	0.000549066	0.000541704	0.000569477	0.000586019	0.000556688	0.000544007	0.000550506	0.000558308	0.000542852	0.000565413	0.000582928	0.00057667	0.000534809	0.000538214	0.00053784	0.000537475	0.000549906	0.000546334	0.000540701	0.000545068	0.000545216	0.00053846	0.000539312	0.000549043	0.00055134	Tetracycline biosynthesis	0.0719851	0.0490231
ko00260	0.0285229	0.0233072	0.0234505	0.0268058	0.0230049	0.021457	0.0241546	0.0237848	0.0279014	0.0288738	0.0273532	0.0242309	0.0259532	0.0271985	0.0216441	0.0229564	0.0236303	0.0255415	0.0222609	0.023448	0.0232512	0.0256317	0.0255931	0.027708	0.025976	0.0246949	Glycine, serine and threonine metabolism	0.42504	0.0420337
ko00270	0.012254	0.0117216	0.011736	0.012652	0.0131162	0.0118219	0.011827	0.0118098	0.0130891	0.0130784	0.0131568	0.0131198	0.0126639	0.0120514	0.011778	0.0115698	0.0116082	0.0126956	0.0117247	0.0116674	0.0116665	0.0125277	0.0123966	0.0125098	0.0126322	0.0122794	Cysteine and methionine metabolism	0.0165003	0.0121692
ko00280	0.00860657	0.00977902	0.00944041	0.00709925	0.00578637	0.00905371	0.00871463	0.00920612	0.00723689	0.00706344	0.00640375	0.00625051	0.00715801	0.00830088	0.00879282	0.009072	0.00891995	0.00694823	0.0087889	0.00879926	0.00887476	0.00761302	0.00770885	0.00727734	0.00677364	0.0072382	Valine, leucine and isoleucine degradation	0.0174726	0.0104264
ko00281	0.00352357	0.00370589	0.00366784	0.00285473	0.00217808	0.00363205	0.00345053	0.00358014	0.00279254	0.00284719	0.00259959	0.002339	0.00283844	0.00349611	0.00336722	0.00371335	0.00354947	0.00280956	0.00333446	0.00347078	0.00342454	0.00303253	0.0031178	0.00308314	0.00280348	0.00297211	Geraniol degradation	0.0165003	0.0104264
ko00290	0.00600075	0.00529924	0.00555381	0.00633674	0.00638154	0.00549245	0.00567458	0.00556471	0.00639305	0.00645619	0.00651224	0.00638436	0.00628275	0.00591779	0.00499633	0.00545107	0.00552453	0.006134	0.00547981	0.00550463	0.005532	0.00602081	0.00596904	0.00615847	0.00619686	0.00596625	Valine, leucine and isoleucine biosynthesis	0.0165003	0.00678175
ko00300	0.00922007	0.00924004	0.00926659	0.00953745	0.0092515	0.00922308	0.0090767	0.00925876	0.0093699	0.00927113	0.00937824	0.00937461	0.00956528	0.00920963	0.00931399	0.00920182	0.00915099	0.0091995	0.0092241	0.00915442	0.0092176	0.00924471	0.00919943	0.00919067	0.00916999	0.00934283	Lysine biosynthesis	0.208674	0.898786
ko00310	0.00590847	0.00710217	0.00716204	0.0054474	0.00472416	0.00709705	0.00624766	0.00688263	0.0056227	0.00529944	0.00483466	0.00509206	0.00563302	0.00609564	0.00732337	0.00713403	0.00697277	0.00556735	0.00714632	0.00676245	0.00702388	0.00617344	0.00623241	0.00540789	0.00518866	0.00574612	Lysine degradation	0.0165003	0.0149194
ko00311	0.00206374	0.00243478	0.00231806	0.00170193	0.00151553	0.00240707	0.00213368	0.00234043	0.00187493	0.00179192	0.0016258	0.00164547	0.00176351	0.00203801	0.00243755	0.00232309	0.00229111	0.00184907	0.00229971	0.00227066	0.00229383	0.00203962	0.00203331	0.00184083	0.00174458	0.00185699	Penicillin and cephalosporin biosynthesis	0.0266359	0.0104264
ko00312	0.000792036	0.000934406	0.000882085	0.000677337	0.000583956	0.000941768	0.000801054	0.000902966	0.000767506	0.000718277	0.000645246	0.000661185	0.000698805	0.000730374	0.000971902	0.000815965	0.000833138	0.00068538	0.000861416	0.000823346	0.000855113	0.000770451	0.000774768	0.000679127	0.000642267	0.000706296	beta-Lactam resistance	0.0312382	0.0247654
ko00330	0.0225237	0.0212559	0.0212733	0.0220606	0.0217869	0.0206637	0.0216155	0.0214225	0.0223265	0.0225165	0.0224315	0.0217936	0.0217739	0.0228451	0.0200863	0.0219695	0.0221293	0.0224891	0.0214762	0.0221047	0.0219659	0.0223095	0.0221048	0.0230483	0.0227794	0.0220277	Arginine and proline metabolism	0.168438	0.112367
ko00331	9.51e-06	1.22e-05	1.15e-05	8.14e-06	1.69e-05	1.12e-05	1.26e-05	1.18e-05	9.62e-06	9.68e-06	1.14e-05	1.39e-05	8.57e-06	7.57e-06	7.94e-06	9.65e-06	1.07e-05	1.38e-05	8.35e-06	1.01e-05	8.8e-06	1.1e-05	9.58e-06	1.14e-05	1.49e-05	9.9e-06	Clavulanic acid biosynthesis	0.978623	0.112367
ko00340	0.011471	0.0115049	0.0112613	0.011209	0.0107075	0.0112213	0.0109511	0.0114072	0.0117283	0.0114555	0.0111806	0.0111565	0.0112541	0.0109431	0.0112005	0.0107185	0.010825	0.0108376	0.0110248	0.010852	0.0110735	0.011137	0.0110488	0.0108364	0.0106979	0.0108037	Histidine metabolism	0.470249	0.824474
ko00350	0.00677959	0.00652891	0.00647264	0.00607878	0.0050657	0.00638268	0.00623123	0.00642858	0.00632239	0.00638048	0.00591869	0.00546935	0.00598614	0.00660011	0.00646336	0.00640265	0.0063262	0.00594104	0.00626559	0.00628186	0.00632185	0.0062451	0.00633531	0.00628879	0.0058945	0.00603408	Tyrosine metabolism	0.0310987	0.0549625
ko00351	0.000322991	0.00041208	0.000395488	0.000257699	0.00022022	0.000369054	0.000331545	0.000385555	0.000299267	0.000271632	0.000234483	0.000250398	0.000271041	0.000285856	0.000370315	0.000349765	0.000349412	0.000263108	0.00036007	0.000342595	0.000360628	0.000305668	0.000303663	0.000253673	0.000236765	0.000264311	DDT degradation	0.0174726	0.0210798
ko00360	0.00884106	0.00958031	0.00909469	0.00709612	0.00593599	0.00889465	0.00862483	0.009099	0.00770073	0.00758829	0.00682149	0.00653428	0.00713634	0.00887158	0.00861289	0.00919871	0.00946555	0.00750943	0.00888347	0.00924361	0.0091882	0.00814543	0.00813787	0.00804454	0.0074814	0.00733725	Phenylalanine metabolism	0.0285912	0.0144156
ko00361	0.00156601	0.00130914	0.00131849	0.00152294	0.00144726	0.00142889	0.00138887	0.00134581	0.00158899	0.00163994	0.00163115	0.00149001	0.00147809	0.00147085	0.00132152	0.00128585	0.00123902	0.00147545	0.00125392	0.00126768	0.00125889	0.00145523	0.00147054	0.00155271	0.00150217	0.00147682	Chlorocyclohexane and chlorobenzene degradation	0.0550532	0.0292975
ko00362	0.00622998	0.00589149	0.00587693	0.00525884	0.00394553	0.00579149	0.00574595	0.00578941	0.00529331	0.00548867	0.00500407	0.00433439	0.00515119	0.00618267	0.00566068	0.00599849	0.00587595	0.00511848	0.00556273	0.00577376	0.00571087	0.00542583	0.00558098	0.00569766	0.00515374	0.00527309	Benzoate degradation	0.017658	0.0420337
ko00363	0.00295235	0.00313153	0.00309335	0.00262291	0.00217441	0.00297616	0.00295337	0.00302268	0.0026047	0.0026	0.00242263	0.00229584	0.00261866	0.00286131	0.00290871	0.00300949	0.00294085	0.00253857	0.00295699	0.00293403	0.00296717	0.00269499	0.00275029	0.00266056	0.00248745	0.00265705	Bisphenol degradation	0.0165003	0.019828
ko00364	0.000522366	0.000352358	0.000376828	0.000517619	0.000449576	0.000423305	0.000430305	0.000389842	0.000533335	0.000576689	0.00056151	0.000471946	0.00049474	0.000502664	0.000411048	0.000386302	0.000379543	0.000498119	0.000370727	0.000382048	0.000372086	0.000480168	0.000494256	0.00054365	0.000512982	0.000488538	Fluorobenzoate degradation	0.0526799	0.0772835
ko00380	0.00492918	0.00545505	0.0051267	0.00393249	0.00292051	0.00503308	0.00471881	0.0051293	0.00436341	0.00419181	0.00363584	0.00343644	0.00396449	0.00454015	0.00502398	0.00471821	0.0047664	0.00380511	0.00485155	0.00475284	0.00490198	0.0042979	0.00434297	0.00404391	0.00363287	0.00384858	Tryptophan metabolism	0.0285912	0.019828
ko00400	0.0107664	0.0104577	0.010628	0.0122452	0.0132338	0.0110972	0.0108555	0.0108478	0.0121373	0.0119324	0.0125944	0.013017	0.0123005	0.010837	0.0102814	0.0105505	0.0106058	0.0118977	0.0109931	0.010703	0.0108386	0.0115662	0.011335	0.0114626	0.0119342	0.0117294	Phenylalanine, tyrosine and tryptophan biosynthesis	0.0165003	0.00619055
ko00401	0.000898119	0.000739698	0.000762664	0.000954894	0.000869927	0.000758365	0.0008086	0.000785732	0.000923125	0.000949421	0.00096309	0.000892766	0.000940271	0.000893323	0.000732269	0.00076961	0.000792156	0.000882915	0.000762059	0.000790777	0.000782321	0.000862188	0.000859158	0.00092725	0.000907708	0.000879378	Novobiocin biosynthesis	0.0757517	0.0247654
ko00410	0.0022269	0.00202227	0.0020131	0.00204277	0.00177004	0.00198577	0.00203083	0.0020233	0.00204775	0.00211923	0.00203677	0.0018342	0.00199907	0.00221029	0.00197031	0.00206241	0.00204026	0.00199493	0.00192178	0.00202097	0.00197828	0.00202181	0.00204527	0.00215818	0.00203225	0.0020122	beta-Alanine metabolism	0.807249	0.883733
ko00430	0.00277138	0.00251274	0.00253684	0.00243899	0.00221607	0.00236743	0.0025362	0.00251897	0.0025435	0.00263287	0.00248318	0.00226168	0.00239478	0.00271484	0.00233192	0.00255766	0.00255831	0.00250342	0.00236694	0.00251403	0.00247064	0.00252819	0.00253379	0.00265642	0.00252073	0.00238861	Taurine and hypotaurine metabolism	0.422407	0.902661
ko00440	0.0023528	0.00214238	0.00212162	0.00200474	0.00159561	0.00196971	0.00208377	0.00210445	0.00198914	0.00208356	0.00194999	0.00169079	0.00195095	0.00235167	0.00192298	0.00223944	0.0021939	0.00199238	0.00196962	0.00215629	0.00209491	0.00205879	0.00209492	0.00223016	0.00204536	0.00203082	Phosphonate and phosphinate metabolism	0.0165003	0.705689
ko00450	0.00550207	0.00524535	0.00523508	0.00579975	0.00632202	0.00532296	0.00532886	0.00531445	0.00609777	0.00607555	0.00618022	0.00627621	0.00580576	0.00542205	0.00544937	0.00519396	0.00527892	0.00590011	0.00531912	0.00530522	0.00531672	0.00577368	0.0056915	0.00577401	0.00588938	0.0056615	Selenocompound metabolism	0.0165003	0.0104264
ko00460	0.00152543	0.00163563	0.00171134	0.00139833	0.00143188	0.00170002	0.00155104	0.00163109	0.0014838	0.00148509	0.00142462	0.00144776	0.0014334	0.0015781	0.00171272	0.00177283	0.00172148	0.00154427	0.00164601	0.00165486	0.0016799	0.0015931	0.0016176	0.00148965	0.00148358	0.00146896	Cyanoamino acid metabolism	0.0503965	0.0104264
ko00471	0.00166369	0.0019856	0.00192038	0.00166738	0.00184234	0.00189571	0.00177795	0.00190972	0.00172319	0.00162391	0.00166274	0.00182921	0.00171358	0.00163546	0.00189363	0.00185278	0.00183782	0.00171937	0.00188025	0.00183652	0.00186881	0.00175931	0.00172184	0.00161023	0.00167285	0.00171498	D-Glutamine and D-glutamate metabolism	0.135685	0.0375247
ko00472	0.000107187	8.23e-05	8.32e-05	0.00012362	0.000134942	8.04e-05	9.52e-05	8.83e-05	0.000122177	0.000126099	0.000135086	0.000130021	0.000121668	0.000107737	7.83e-05	8.72e-05	9.33e-05	0.000121225	8.42e-05	9.3e-05	9.02e-05	0.000110968	0.000108553	0.000124388	0.000126243	0.000113455	D-Arginine and D-ornithine metabolism	0.0194297	0.0104264
ko00473	0.00232706	0.00256007	0.00258786	0.00227149	0.0022569	0.00238237	0.00235377	0.00248662	0.00228563	0.00224212	0.00221112	0.00229263	0.0023003	0.00230528	0.0023933	0.00253279	0.00249835	0.002291	0.00247742	0.00247665	0.00249812	0.00237696	0.00234765	0.00222073	0.00223555	0.00233058	D-Alanine metabolism	0.0174726	0.019828
ko00480	0.0103279	0.00984535	0.00971015	0.0101869	0.0105876	0.00956382	0.00971004	0.00978594	0.010571	0.0106079	0.0107194	0.0105925	0.0101827	0.0103561	0.00985259	0.0100212	0.0100864	0.0105601	0.00951122	0.00999573	0.00985065	0.010426	0.0102674	0.010616	0.0106333	0.0101333	Glutathione metabolism	0.0312382	0.0499057
ko00500	0.0093672	0.0111086	0.0122749	0.0108946	0.0151794	0.0130738	0.0113775	0.0116049	0.011498	0.0112915	0.011996	0.0140197	0.0112999	0.0103557	0.0121549	0.0127899	0.0124337	0.013005	0.0127547	0.0121634	0.0121871	0.0126308	0.0125236	0.011075	0.0125873	0.012236	Starch and sucrose metabolism	0.274267	0.792897
ko00510	0.00125987	0.00133508	0.00135723	0.00138627	0.00148266	0.00150355	0.0012957	0.00136968	0.00154821	0.00145675	0.00142973	0.0015401	0.00140352	0.00114694	0.00136646	0.00116772	0.00117421	0.00133774	0.00142622	0.00120458	0.00131452	0.0013779	0.00136541	0.00121368	0.00126654	0.00133221	N-Glycan biosynthesis	0.0478371	0.370869
ko00511	0.0011423	0.00161515	0.0020979	0.00206182	0.001185	0.002425	0.00233568	0.00178593	0.00124104	0.00118521	0.00107982	0.00119896	0.00204311	0.00139732	0.00236094	0.00188855	0.00164984	0.00142099	0.00315237	0.00196518	0.00232179	0.00154894	0.00186623	0.00117067	0.00114938	0.00209869	Other glycan degradation	0.0648306	0.212376
ko00513	0.0001444	1.71e-05	2.74e-05	0.000155427	8.79e-05	4.17e-05	5.73e-05	4.46e-05	0.00017833	0.000194355	0.000177165	0.000118781	0.000138337	0.00012267	6.59e-05	2.06e-05	2.79e-05	0.000117924	4.07e-05	3.59e-05	4.16e-05	0.000113164	0.000118025	0.000148594	0.00012322	0.000116135	Various types of N-glycan biosynthesis	0.0648306	0.0247654
ko00520	0.0157484	0.0167313	0.0167118	0.0166516	0.0180667	0.017014	0.0164002	0.0166053	0.0171994	0.0167455	0.0169673	0.0178887	0.0168005	0.0155345	0.0179465	0.0162076	0.0162028	0.0168727	0.0171652	0.0163287	0.0166732	0.0168396	0.0167694	0.0159633	0.0164677	0.0167515	Amino sugar and nucleotide sugar metabolism	0.0432809	0.808727
ko00521	0.00241411	0.0026987	0.00268924	0.00252081	0.0027076	0.00265464	0.00263893	0.00264597	0.00250739	0.00244182	0.00247146	0.00264124	0.0025378	0.00238987	0.00257766	0.0025773	0.00257755	0.00252792	0.00272441	0.00259882	0.00264421	0.0025287	0.00252194	0.00241051	0.00248219	0.00257245	Streptomycin biosynthesis	0.443365	0.13612
ko00522	0.00017391	0.000204726	0.000205921	0.000177251	0.000234279	0.000226498	0.000212166	0.000209856	0.000158827	0.000174488	0.000200908	0.000212398	0.000174062	0.000177538	0.00021581	0.000213084	0.000197595	0.000197502	0.000178024	0.00019519	0.000180615	0.00018389	0.000187872	0.000193977	0.000211173	0.000234582	Biosynthesis of 12-, 14- and 16-membered macrolides	0.898981	0.734034
ko00523	0.00125496	0.0016469	0.00160901	0.0012569	0.00148679	0.00164993	0.00147378	0.0015816	0.001361	0.00125309	0.00124489	0.00146184	0.00131775	0.00126122	0.00161454	0.00153619	0.00154536	0.00136934	0.00163386	0.00152604	0.00157976	0.00142522	0.0014085	0.00121897	0.00129364	0.00133426	Polyketide sugar unit biosynthesis	0.137358	0.0499057
ko00524	0.000133155	0.000114436	0.000123336	0.000152023	0.000175393	0.000135158	0.00013944	0.000123455	0.000145354	0.00015559	0.000164294	0.000163355	0.000147359	0.00014807	0.000143161	0.000140665	0.000141006	0.00016596	0.000139749	0.00014241	0.000134278	0.000152267	0.000154942	0.000163184	0.000170867	0.00016443	Butirosin and neomycin biosynthesis	0.0165003	0.0320595
ko00531	0.000523884	0.000658568	0.000853475	0.000822043	0.000346603	0.000955097	0.000967665	0.000756759	0.000496025	0.000469221	0.000378238	0.000375825	0.00079737	0.000654083	0.000833526	0.000841473	0.000698673	0.000556376	0.00133102	0.000859521	0.00100759	0.000661836	0.000791602	0.00049676	0.000432123	0.000826413	Glycosaminoglycan degradation	0.0335477	0.125072
ko00532	0.000115654	0.00016888	0.000149987	0.000106126	0.000135402	0.000144535	0.000128658	0.000149039	0.000119668	0.000101864	0.000110909	0.000132531	0.000113455	0.00010506	0.000135566	0.000137683	0.000124872	0.000118752	0.000139033	0.000133291	0.000137009	0.000122493	0.000112698	0.000101862	0.000110248	0.000116924	Glycosaminoglycan biosynthesis - chondroitin sulfate	0.171147	0.0577933
ko00540	0.00945335	0.00935994	0.00921581	0.00973851	0.00853722	0.00970016	0.00912076	0.00947045	0.00972193	0.00947087	0.00927934	0.00910226	0.00980167	0.00912683	0.0101423	0.00868727	0.00874006	0.00879299	0.00936091	0.00885499	0.00913802	0.00911076	0.00920144	0.00885951	0.00861858	0.00913736	Lipopolysaccharide biosynthesis	0.964297	0.992874
ko00550	0.0130034	0.0133137	0.0133504	0.0136844	0.0145894	0.0135164	0.0130349	0.0133878	0.0138545	0.0136133	0.0139403	0.0144843	0.013819	0.0130577	0.013924	0.0132908	0.0133682	0.0137777	0.0133563	0.0132733	0.013299	0.0137133	0.0135115	0.013262	0.0136679	0.0135452	Peptidoglycan biosynthesis	0.0165003	0.734034
ko00561	0.00316299	0.00341402	0.00340282	0.00333198	0.00431528	0.00346436	0.00348015	0.0034094	0.00339667	0.00339896	0.00363887	0.00398763	0.00336868	0.00309784	0.00324494	0.00333107	0.00332385	0.00358784	0.00326367	0.00331853	0.00324493	0.00339267	0.00332296	0.00333323	0.00362605	0.00344707	Glycerolipid metabolism	0.42504	0.0863359
ko00562	0.00438839	0.00322523	0.00334967	0.0043067	0.00324936	0.00310134	0.00366568	0.00336062	0.00419018	0.00445794	0.00423034	0.00349968	0.00407139	0.00409106	0.00308395	0.0031849	0.00312654	0.0037377	0.00329923	0.00326859	0.00329645	0.00371869	0.00383663	0.00420207	0.00382489	0.00397014	Inositol phosphate metabolism	0.482797	0.0121692
ko00563	4.04e-05	7.7e-05	3.79e-05	6.86e-05	0.000116503	9.16e-05	0.000103322	6.19e-05	5.74e-05	6.64e-05	7.61e-05	0.000101871	6.84e-05	4.31e-05	0.000327719	3.31e-05	9.79e-05	8.29e-05	8.84e-05	8.64e-05	5.89e-05	6.04e-05	7.15e-05	6.22e-05	8.45e-05	6.75e-05	Glycosylphosphatidylinositol(GPI)-anchor biosynthesis	0.605219	0.580177
ko00564	0.00791576	0.00746064	0.00768825	0.007711	0.00640344	0.00776026	0.00760707	0.0076524	0.00732318	0.0075318	0.00720464	0.00669533	0.00765325	0.00785457	0.00788135	0.00765295	0.00749011	0.00711225	0.00751253	0.0074269	0.00747861	0.00734026	0.00759651	0.00746407	0.00709425	0.00755525	Glycerophospholipid metabolism	0.0844718	0.115324
ko00565	8.43e-05	9.06e-05	0.000106158	7.15e-05	6.49e-05	0.000163705	0.000105822	9.77e-05	6.07e-05	7.16e-05	7.26e-05	6.39e-05	7.33e-05	0.000100954	0.000116943	0.000124279	9.89e-05	7.62e-05	9.94e-05	9.37e-05	9.02e-05	8.03e-05	9.8e-05	8.03e-05	7.52e-05	8.36e-05	Ether lipid metabolism	0.0898056	0.0104264
ko00590	0.000618173	0.000638512	0.000622759	0.00052717	0.000571008	0.000647823	0.000613532	0.000618782	0.000588508	0.00058972	0.000574295	0.000566174	0.000535083	0.000616757	0.000585519	0.000637457	0.000624268	0.000598679	0.000583647	0.000614414	0.00060141	0.000601472	0.000593037	0.000599858	0.000592877	0.000539204	Arachidonic acid metabolism	0.115411	0.224837
ko00591	0.00195401	0.00228771	0.00213455	0.00172876	0.00159415	0.00214127	0.00207829	0.00212952	0.00179139	0.00171208	0.0016223	0.00166815	0.00174909	0.00181825	0.00233009	0.00199145	0.00198063	0.00168622	0.00210238	0.00202988	0.00205866	0.00179816	0.00182181	0.0016879	0.00162233	0.00178273	Linoleic acid metabolism	0.0165003	0.0208978
ko00592	0.000136506	0.00018555	0.00020273	0.000109187	7.98e-05	0.000248993	0.000158899	0.000195385	0.00013413	0.000123437	9.01e-05	0.000106429	0.000119106	0.000143606	0.000209529	0.000191444	0.000188845	0.000113507	0.000203783	0.000174994	0.000190293	0.000153508	0.000166312	0.000102818	9.58e-05	0.000114862	alpha-Linolenic acid metabolism	0.0312382	0.0149194
ko00600	0.00123201	0.00146654	0.00163974	0.00157845	0.000799543	0.00166798	0.00187624	0.00150817	0.00102561	0.000986953	0.000896703	0.000840441	0.00152339	0.00128633	0.00135674	0.0014648	0.00128447	0.00106356	0.00224356	0.00156843	0.00181027	0.00119163	0.00136343	0.0010608	0.000938185	0.00155393	Sphingolipid metabolism	0.0335477	0.278964
ko00601	0.000145846	5.93e-05	7.33e-05	0.000169212	0.000128734	9.03e-05	8.79e-05	8.65e-05	0.000182223	0.00019139	0.000179865	0.000147648	0.000155858	0.000131785	0.000119145	6.53e-05	7.14e-05	0.000137881	8.52e-05	7.35e-05	7.88e-05	0.000135135	0.000140493	0.00015285	0.000139986	0.000144344	Glycosphingolipid biosynthesis - lacto and neolacto series	0.0404242	0.00678175
ko00603	0.000192268	0.000185493	0.000203114	0.000185853	0.00011769	0.000194803	0.000193246	0.000191807	0.000179217	0.000187483	0.000159208	0.000136269	0.000186068	0.000184849	0.00023636	0.000190158	0.000184528	0.000164815	0.000206276	0.000184319	0.000189858	0.000184687	0.000198697	0.000171576	0.000150782	0.00017897	Glycosphingolipid biosynthesis - globo series	0.0648306	0.0807913
ko00604	5.44e-05	8.43e-05	9.84e-05	5.53e-05	3.52e-05	0.000104079	7.62e-05	8.5e-05	5.28e-05	4.93e-05	3.53e-05	4.11e-05	6.23e-05	6.48e-05	0.000143676	0.000101667	9.49e-05	5.98e-05	0.000104638	8.68e-05	9.29e-05	7.39e-05	8.43e-05	5.04e-05	4.44e-05	6.6e-05	Glycosphingolipid biosynthesis - ganglio series	0.0238875	0.0172291
ko00620	0.012733	0.0130275	0.0131891	0.0124473	0.0111906	0.012916	0.0128804	0.0129497	0.0119766	0.0120087	0.0116386	0.0113847	0.0124492	0.0128381	0.012648	0.0131248	0.0129221	0.0119592	0.0130912	0.012883	0.0130141	0.0123155	0.0125278	0.012226	0.0118479	0.0124025	Pyruvate metabolism	0.0165003	0.0210798
ko00621	0.000556571	0.000394844	0.000413446	0.000524526	0.000380833	0.000444896	0.000442554	0.000423029	0.000520997	0.00055766	0.000527678	0.000423614	0.000496884	0.000525596	0.000414397	0.000410105	0.000391414	0.000457687	0.00038385	0.000396432	0.000395276	0.000461476	0.000481147	0.000526821	0.000473444	0.000485207	Dioxin degradation	0.470249	0.0733446
ko00622	0.000543154	0.000431504	0.000441298	0.000498125	0.000372466	0.000493354	0.000474083	0.000452675	0.000486235	0.000519657	0.000492194	0.000405746	0.000472866	0.000550549	0.000486193	0.000473681	0.000457591	0.00046116	0.000445489	0.000458335	0.000449872	0.000469416	0.000493626	0.000530316	0.000478792	0.000490861	Xylene degradation	0.946282	0.473532
ko00623	0.00139559	0.00113518	0.00117454	0.00133387	0.00110949	0.00128757	0.00122704	0.00119242	0.00135941	0.0014215	0.00135844	0.00118653	0.00129741	0.00138665	0.00130121	0.001216	0.0011731	0.00128738	0.00118995	0.0011863	0.00118544	0.00130811	0.00134748	0.00137819	0.00129258	0.00130155	Toluene degradation	0.453606	0.174221
ko00624	0.00271934	0.00240825	0.00242663	0.00262354	0.00231664	0.00241234	0.00242491	0.0024316	0.00271818	0.00277255	0.00264892	0.00245187	0.00256466	0.00258375	0.00246684	0.00232998	0.00232114	0.00251879	0.00235226	0.0023238	0.0023473	0.00254078	0.00256979	0.00262113	0.00252403	0.00252905	Polycyclic aromatic hydrocarbon degradation	0.433213	0.0350475
ko00625	0.00325863	0.00344445	0.00339886	0.00301664	0.00273167	0.00324339	0.00338756	0.00332634	0.00290492	0.00291159	0.0028183	0.00274582	0.00299029	0.00330666	0.00305363	0.00344774	0.00340409	0.00305222	0.00345041	0.00344989	0.00345868	0.00312424	0.00316322	0.00316066	0.0030534	0.00316118	Chloroalkane and chloroalkene degradation	0.0165003	0.194337
ko00626	0.00209653	0.0018933	0.00190728	0.00183883	0.00136211	0.00194198	0.00190379	0.00189146	0.00182085	0.00189176	0.00174303	0.00149108	0.00178642	0.00207458	0.00187057	0.0019444	0.00188416	0.00172083	0.00182947	0.00187359	0.00186293	0.0018106	0.00187774	0.00193129	0.00173934	0.00181485	Naphthalene degradation	0.0206161	0.191408
ko00627	0.00539801	0.00471778	0.0047241	0.00489489	0.00407015	0.00478462	0.0049058	0.00474219	0.00498625	0.00519309	0.00492212	0.00431529	0.00476288	0.00520741	0.00456756	0.00469406	0.00463342	0.00471796	0.00454066	0.00465256	0.00460728	0.00479873	0.00490491	0.00513346	0.00477721	0.00472444	Aminobenzoate degradation	0.818924	0.0997905
ko00630	0.0152041	0.0135936	0.0137988	0.014404	0.0125715	0.0130864	0.0139878	0.0138123	0.0142397	0.014706	0.0141646	0.0129523	0.0141946	0.014994	0.0125901	0.0138064	0.0139295	0.0138901	0.0131477	0.0137552	0.0136034	0.0139661	0.0140759	0.0147995	0.0141255	0.0137994	Glyoxylate and dicarboxylate metabolism	0.96791	0.224837
ko00633	0.00234683	0.00200749	0.00203975	0.00215887	0.00145748	0.00194558	0.00204081	0.00207828	0.00219148	0.00227675	0.00204252	0.00172465	0.00214468	0.00237029	0.00217511	0.00209621	0.0022089	0.00203621	0.00210462	0.00215483	0.0021691	0.00216525	0.0022231	0.00226978	0.00203169	0.0020371	Nitrotoluene degradation	0.928172	0.781268
ko00640	0.00625688	0.00608735	0.00604354	0.00567657	0.0046519	0.00596061	0.00598518	0.00601337	0.00558696	0.00569822	0.00535765	0.00489183	0.0056253	0.00624154	0.00582562	0.00608524	0.005967	0.00541279	0.00590784	0.00596483	0.00597913	0.0056512	0.0057701	0.00579184	0.00540404	0.00557407	Propanoate metabolism	0.0165003	0.0308207
ko00642	0.00102404	0.00111246	0.00109063	0.000906906	0.000762571	0.00112393	0.00102288	0.00107852	0.00092739	0.000911354	0.000850709	0.000825768	0.000912086	0.000999751	0.00117517	0.00106419	0.00103331	0.000879113	0.00105459	0.00102804	0.00103884	0.000946452	0.000968891	0.000905996	0.000853646	0.000925095	Ethylbenzene degradation	0.0335477	0.00912436
ko00643	0.00168542	0.00153228	0.00152449	0.00142747	0.00108314	0.00148848	0.00146901	0.00152074	0.00155806	0.00158435	0.00141284	0.00123504	0.00139762	0.00157998	0.00143828	0.00144907	0.00146553	0.00137242	0.00141688	0.00143612	0.00144762	0.00147036	0.00148959	0.00150691	0.00136301	0.0013477	Styrene degradation	0.223208	0.867082
ko00650	0.00901951	0.00876597	0.00873106	0.00794752	0.00636754	0.00845228	0.00857602	0.00858924	0.00780455	0.00800397	0.00747599	0.00673903	0.00782541	0.00895436	0.00831838	0.00880644	0.00860519	0.00766562	0.00836967	0.00856631	0.00852943	0.00802164	0.00820782	0.00830876	0.00768122	0.00796735	Butanoate metabolism	0.0165003	0.0172291
ko00660	0.00210456	0.00176342	0.00183454	0.0021639	0.00202009	0.00181049	0.00190978	0.00185203	0.00217155	0.00222005	0.00220303	0.00206831	0.00212812	0.00203837	0.00171414	0.00178273	0.00180701	0.00202113	0.00178534	0.00180723	0.00181422	0.00199373	0.00199311	0.00209151	0.00204976	0.00199225	C5-Branched dibasic acid metabolism	0.0517088	0.0149194
ko00670	0.00564263	0.00519002	0.00515687	0.00598192	0.0059859	0.0051616	0.00532221	0.00528645	0.00604724	0.00602453	0.00613302	0.00603412	0.00594219	0.00542667	0.00529304	0.0049613	0.00502535	0.00568711	0.00514569	0.00510347	0.00514399	0.00557596	0.0055136	0.00569358	0.00570927	0.00562259	One carbon pool by folate	0.0174726	0.0104264
ko00680	0.013807	0.0121995	0.0121361	0.0133001	0.0120726	0.0114142	0.0125462	0.0123286	0.0135026	0.013894	0.013422	0.0124242	0.0131134	0.0131755	0.0113458	0.0116691	0.0119858	0.0127427	0.0115829	0.0120076	0.0119151	0.0127005	0.0127237	0.0134111	0.0129216	0.0125584	Methane metabolism	0.463931	0.0314331
ko00710	0.00416114	0.00414376	0.00416929	0.00454505	0.00513115	0.00404967	0.00417178	0.00417254	0.00449456	0.00447801	0.00472087	0.00493514	0.00457711	0.00425668	0.00425365	0.00427688	0.00431442	0.00467035	0.00419201	0.00430873	0.00425599	0.00449542	0.00442185	0.00450043	0.0047066	0.00456591	Carbon fixation in photosynthetic organisms	0.0198906	0.0281693
ko00720	0.00991594	0.010184	0.0100244	0.00919058	0.00764927	0.00995632	0.00985142	0.00997279	0.00909597	0.00902175	0.00852205	0.00812282	0.00917028	0.00968989	0.0096551	0.00967997	0.0096067	0.00865194	0.00995043	0.00970021	0.00986344	0.00912093	0.0092469	0.0090199	0.00853834	0.00899925	Carbon fixation pathways in prokaryotes	0.0165003	0.0525694
ko00730	0.00569054	0.00548473	0.00569874	0.00638745	0.0070011	0.00579171	0.00580827	0.00572869	0.00636256	0.00632942	0.00657361	0.00687378	0.00642725	0.00569164	0.00599979	0.00556553	0.00569818	0.00625749	0.00582496	0.00565051	0.00571693	0.00607565	0.00603097	0.00596202	0.00626354	0.00608676	Thiamine metabolism	0.0165003	0.0320595
ko00740	0.00401678	0.00397033	0.00395518	0.00444177	0.00501207	0.0041382	0.00407019	0.00405315	0.00450665	0.00443781	0.00468659	0.00488757	0.00446006	0.00398084	0.00405253	0.0038921	0.00392693	0.00443867	0.00403829	0.00397776	0.00397924	0.0042912	0.00419793	0.00425364	0.00446616	0.00431363	Riboflavin metabolism	0.0165003	0.0145854
ko00750	0.00344592	0.00321686	0.00329417	0.00370967	0.00356885	0.00332729	0.00332865	0.00333439	0.00358888	0.00359991	0.0036842	0.00361546	0.00370458	0.00342856	0.00326497	0.00327304	0.00327152	0.00348233	0.00330181	0.00327897	0.00330357	0.00345539	0.00344085	0.00350045	0.00350137	0.00353933	Vitamin B6 metabolism	0.062606	0.00619055
ko00760	0.00709253	0.00711144	0.006909	0.00750359	0.00863962	0.00711955	0.00724063	0.00711607	0.0075208	0.00747718	0.00798091	0.00827991	0.0075537	0.00710443	0.00709704	0.00700023	0.00706747	0.00770431	0.00687648	0.00712484	0.00698822	0.0073677	0.00722288	0.00750258	0.00783585	0.00751827	Nicotinate and nicotinamide metabolism	0.0165003	0.0290683
ko00770	0.00749871	0.00661681	0.00685498	0.00802502	0.00768847	0.00690462	0.00691904	0.00691072	0.00805212	0.00811901	0.00814476	0.00787474	0.00795423	0.00737315	0.00682851	0.00670538	0.00674563	0.00756036	0.00686761	0.00673688	0.00683445	0.00748904	0.00746201	0.00762352	0.00758255	0.00750645	Pantothenate and CoA biosynthesis	0.0213438	0.00619055
ko00780	0.00508651	0.00661794	0.00673086	0.00541283	0.00597499	0.00706193	0.00590155	0.00651639	0.00566177	0.00514857	0.00516907	0.00604754	0.00571326	0.00519992	0.00707074	0.00647964	0.0063555	0.00563363	0.00677598	0.00619578	0.00648341	0.00598282	0.00590952	0.00495995	0.00525131	0.00567074	Biotin metabolism	0.259333	0.0350475
ko00785	0.00175384	0.00195653	0.00181804	0.00195139	0.00251153	0.00190026	0.00186329	0.00190252	0.00208092	0.00196227	0.00214968	0.00239724	0.00197727	0.00162814	0.0018429	0.00168144	0.00170503	0.0020149	0.00184392	0.00178823	0.00182486	0.00191894	0.00183186	0.00183037	0.0020073	0.00192933	Lipoic acid metabolism	0.0165003	0.0607161
ko00790	0.00620881	0.00623173	0.00618267	0.0069392	0.00721778	0.00654188	0.00625547	0.00638934	0.00698858	0.00676902	0.00702335	0.00727134	0.0069979	0.00603507	0.00655201	0.00591335	0.00594233	0.00659377	0.00642122	0.00607597	0.00627449	0.00654597	0.00647931	0.0063215	0.00650383	0.00663725	Folate biosynthesis	0.0165003	0.0825815
ko00791	0.00129765	0.00115513	0.00117804	0.00120573	0.00108512	0.00110437	0.00125083	0.00117075	0.00117517	0.0012381	0.00119338	0.00108359	0.0011726	0.00130471	0.00101931	0.00120722	0.00122564	0.00119804	0.00115631	0.00121123	0.00118173	0.00118385	0.001196	0.00129405	0.00123577	0.00118605	Atrazine degradation	0.582817	0.804513
ko00830	0.000703103	0.000933691	0.000804084	0.000653382	0.000931384	0.000896492	0.000816501	0.000880308	0.000798015	0.000709099	0.0007415	0.000906878	0.000675085	0.000619187	0.000804793	0.00070453	0.000775821	0.000743532	0.000829167	0.000802601	0.000816469	0.000754779	0.000706255	0.000661455	0.000736221	0.00068241	Retinol metabolism	0.795558	0.297365
ko00860	0.0239633	0.0224672	0.0221203	0.0273924	0.0392181	0.0216201	0.024488	0.0227384	0.0294796	0.0294145	0.032922	0.0357729	0.0273507	0.0231469	0.0202323	0.0216766	0.0227683	0.030588	0.0213808	0.0229797	0.0219671	0.0270953	0.0254923	0.028237	0.0314981	0.0269568	Porphyrin and chlorophyll metabolism	0.0194297	0.0104264
ko00900	0.00811769	0.00774121	0.00774049	0.00939576	0.0104969	0.00807517	0.00832895	0.00799724	0.00928143	0.00922756	0.0098359	0.0102075	0.00942813	0.00799672	0.0085982	0.0074825	0.00782887	0.00912474	0.00807671	0.00791878	0.0078862	0.00865261	0.00851276	0.00871993	0.00920087	0.00886255	Terpenoid backbone biosynthesis	0.0165003	0.0210798
ko00901	1.83e-05	2.38e-05	2.43e-05	2.03e-05	2.85e-05	2.24e-05	2.26e-05	2.39e-05	1.86e-05	1.8e-05	2.1e-05	2.43e-05	2.11e-05	2.34e-05	2.51e-05	3.07e-05	3.04e-05	2.61e-05	2.48e-05	2.83e-05	2.63e-05	2.5e-05	2.33e-05	2.46e-05	2.64e-05	2.43e-05	Indole alkaloid biosynthesis	0.750131	0.110182
ko00902	4.36e-05	4.06e-05	4.18e-05	4.31e-05	2.64e-05	3.4e-05	4.16e-05	3.96e-05	3.42e-05	3.88e-05	3.67e-05	2.92e-05	4.1e-05	4e-05	3.15e-05	3.81e-05	3.65e-05	3.35e-05	3.54e-05	3.67e-05	3.61e-05	3.54e-05	3.73e-05	3.78e-05	3.41e-05	3.81e-05	Monoterpenoid biosynthesis	0.0432809	0.982122
ko00903	0.0025391	0.00267197	0.00262982	0.002222	0.0018347	0.00260555	0.00246245	0.0025972	0.00228776	0.00226704	0.00209036	0.00198509	0.00221338	0.0024853	0.00262754	0.0025895	0.00253535	0.00216778	0.00252567	0.00250782	0.00253818	0.00233281	0.00237646	0.00227784	0.00212255	0.00225114	Limonene and pinene degradation	0.0165003	0.00912436
ko00906	0.00275278	0.00309424	0.00284302	0.00313005	0.00555994	0.00289337	0.00302138	0.00295883	0.00389113	0.00368381	0.00419038	0.00499974	0.00319595	0.00241606	0.00276099	0.00249829	0.0027761	0.00392779	0.00264247	0.00281466	0.00268085	0.0034451	0.00311304	0.00328677	0.00396918	0.00314749	Carotenoid biosynthesis	0.0194297	0.0247654
ko00908	0.000682474	0.000682996	0.000674371	0.000761733	0.000801328	0.000687477	0.000680232	0.000691813	0.000755033	0.000732543	0.000768636	0.000800304	0.000767365	0.000663257	0.000730635	0.000640374	0.000655263	0.000718891	0.000685305	0.000664276	0.000675798	0.000706936	0.000692471	0.000690004	0.000717658	0.000721667	Zeatin biosynthesis	0.0165003	0.144314
ko00909	8.68e-05	0.000129749	9.49e-05	0.000107535	0.000182727	0.000171695	0.000160592	0.000114762	9.97e-05	0.000108906	0.000133325	0.000162348	0.000116331	9.27e-05	0.000394729	9.73e-05	0.000127546	0.000122194	0.000134959	0.000130222	9.72e-05	0.000103013	0.000123388	0.000104622	0.000125975	0.000128614	Sesquiterpenoid and triterpenoid biosynthesis	0.319975	0.623588
ko00910	0.0192109	0.0189686	0.0194161	0.0196126	0.0168916	0.0189521	0.0195521	0.0191857	0.0179379	0.0181855	0.0179207	0.017194	0.0196814	0.0195085	0.0189927	0.0194362	0.0190906	0.0182568	0.0195412	0.0191828	0.0192604	0.0185237	0.0188404	0.0186794	0.0181966	0.0192506	Nitrogen metabolism	0.0852886	0.129736
ko00920	0.00483229	0.00482149	0.00493583	0.00548893	0.00589897	0.00538243	0.0052258	0.00503177	0.00531035	0.00524112	0.00551766	0.00573092	0.0055018	0.00489523	0.00492144	0.00487716	0.00484884	0.00533481	0.00530036	0.00499027	0.00506038	0.00518007	0.00519106	0.00513181	0.00534138	0.00540729	Sulfur metabolism	0.0194297	0.0172291
ko00930	0.00104186	0.00112836	0.00114131	0.000826382	0.000656659	0.00113376	0.00107444	0.00110828	0.00079739	0.000828114	0.000751342	0.0006828	0.00083362	0.00108949	0.00111398	0.00121858	0.00116719	0.000870073	0.00105758	0.00111929	0.00109204	0.000939158	0.000971896	0.00093428	0.000857813	0.000892024	Caprolactam degradation	0.0206001	0.00653932
ko00940	0.000908765	0.00111642	0.00111943	0.000737289	0.000629016	0.00108153	0.000973391	0.00105738	0.000772614	0.000745784	0.0006639	0.000677314	0.000770634	0.000928207	0.00111316	0.00113047	0.001081	0.000806605	0.00109139	0.00106349	0.00111447	0.000893292	0.000924382	0.000777554	0.000739584	0.00081449	Phenylpropanoid biosynthesis	0.017658	0.0104264
ko00941	1.73e-05	2.83e-05	2.56e-05	1.41e-05	1.19e-05	2.6e-05	1.98e-05	2.54e-05	1.66e-05	1.32e-05	1.07e-05	1.4e-05	1.54e-05	1.51e-05	2.9e-05	2.18e-05	2.09e-05	1.36e-05	2.45e-05	2.11e-05	2.29e-05	1.77e-05	1.75e-05	1.12e-05	1.09e-05	1.5e-05	Flavonoid biosynthesis	0.0165003	0.0210798
ko00943	2.19e-05	3.5e-05	3.02e-05	2.21e-05	4.71e-05	2.34e-05	3.03e-05	2.77e-05	2.6e-05	2.63e-05	3.21e-05	3.98e-05	2.28e-05	9.93e-06	1.05e-05	1.43e-05	1.78e-05	2.6e-05	1.36e-05	1.75e-05	1.36e-05	2e-05	1.63e-05	2.14e-05	2.77e-05	1.9e-05	Isoflavonoid biosynthesis	0.65864	0.0412534
ko00944	1.51e-05	2.05e-05	2.74e-05	2.24e-05	9.9e-06	2.71e-05	2.59e-05	2.2e-05	1.49e-05	1.41e-05	1.02e-05	1.13e-05	2.28e-05	2.14e-05	3.6e-05	3.05e-05	2.66e-05	1.86e-05	4.16e-05	2.9e-05	3.38e-05	2.43e-05	2.85e-05	1.55e-05	1.39e-05	2.65e-05	Flavone and flavonol biosynthesis	0.0312382	0.0534967
ko00945	0.000294441	0.00027311	0.000271125	0.000278852	0.000283935	0.000269	0.000277179	0.000273196	0.000295324	0.000303778	0.000297474	0.000286188	0.000274342	0.000275517	0.000267529	0.00025839	0.000264234	0.000284012	0.000249882	0.000259993	0.000255066	0.000280808	0.000281254	0.000289651	0.00028694	0.000267728	Stilbenoid, diarylheptanoid and gingerol biosynthesis	0.0615143	0.034049
ko00950	0.000323338	0.000327448	0.000310146	0.000294088	0.000275047	0.0003008	0.000308603	0.000315157	0.000305964	0.000301097	0.000293948	0.000283608	0.000292734	0.000318642	0.000303679	0.000314594	0.000312106	0.000303134	0.000309303	0.000317927	0.00031794	0.00031095	0.000306078	0.000311574	0.000302041	0.000299407	Isoquinoline alkaloid biosynthesis	0.0282241	0.201326
ko00960	0.00119023	0.00114107	0.00114148	0.0011427	0.00102817	0.00112273	0.00115406	0.00112913	0.00107976	0.00111924	0.00110971	0.00103211	0.00112307	0.00118343	0.00110336	0.00115548	0.00113144	0.00109233	0.0010872	0.00112881	0.00110621	0.0010948	0.00112151	0.00116334	0.00111301	0.00115311	Tropane, piperidine and pyridine alkaloid biosynthesis	0.0165003	0.824474
ko00965	1.66e-05	2.14e-05	2.27e-05	1.49e-05	1.57e-05	1.98e-05	1.87e-05	2.07e-05	1.56e-05	1.48e-05	1.32e-05	1.52e-05	1.61e-05	2.11e-05	2.35e-05	2.82e-05	2.58e-05	2.08e-05	2.5e-05	2.54e-05	2.48e-05	2.42e-05	2.39e-05	1.86e-05	1.88e-05	2e-05	Betalain biosynthesis	0.0366309	0.0247654
ko00970	0.0302886	0.0312485	0.0314206	0.0328202	0.0341702	0.0316413	0.030585	0.0316776	0.0328884	0.0321469	0.0328018	0.0343853	0.0332121	0.0297288	0.03252	0.0300063	0.0306409	0.0315391	0.0314752	0.0304935	0.0311047	0.0315001	0.0311934	0.0302376	0.0312515	0.0312953	Aminoacyl-tRNA biosynthesis	0.0322016	0.571321
ko00980	0.00105744	0.000898044	0.000907579	0.00102556	0.00106289	0.000915906	0.000979376	0.000920243	0.00102906	0.00108234	0.00110187	0.0010322	0.000994121	0.00104796	0.000890009	0.000947197	0.000955322	0.00104732	0.00085535	0.0009425	0.000894307	0.0010015	0.00100189	0.00110257	0.00109101	0.00101842	Metabolism of xenobiotics by cytochrome P450	0.017658	0.046048
ko00982	0.0011495	0.00110397	0.00110233	0.00104953	0.0011378	0.00103775	0.00113436	0.00109116	0.00105127	0.00109222	0.00110558	0.00107734	0.00103551	0.00112824	0.000943276	0.00111838	0.00113121	0.00111606	0.000979782	0.00109737	0.0010406	0.00107826	0.00106585	0.00115419	0.00115562	0.00105826	Drug metabolism - cytochrome P450	0.91488	0.738455
ko00983	0.00301537	0.00315622	0.00312588	0.00299922	0.0029297	0.00301815	0.00304404	0.00309772	0.00302221	0.00298626	0.00293911	0.00296927	0.00302053	0.00301966	0.00306039	0.00309745	0.00310922	0.00299505	0.00315786	0.00310269	0.00313894	0.00305279	0.00303826	0.0029671	0.00295156	0.00296647	Drug metabolism - other enzymes	0.0292344	0.0563664
ko00984	0.000904193	0.00105363	0.000924781	0.000756868	0.000664637	0.000958631	0.00092067	0.000971343	0.000782427	0.000737967	0.000730646	0.000709276	0.000757623	0.000798418	0.000821831	0.000842428	0.000794424	0.000717618	0.000865545	0.000856663	0.000887322	0.000763304	0.000758083	0.000758296	0.000711249	0.000792279	Steroid degradation	0.0282241	0.0490231
ko01040	0.00248477	0.0027098	0.00270791	0.00243157	0.00238448	0.00285773	0.00264466	0.00269965	0.00244622	0.00238247	0.00233632	0.0024084	0.00243283	0.00245786	0.00259244	0.00262536	0.0025646	0.0023766	0.00275635	0.0025935	0.00266309	0.00248227	0.00251069	0.00235256	0.00233184	0.00247631	Biosynthesis of unsaturated fatty acids	0.0194297	0.0534967
ko01051	0.00115284	0.00112884	0.00113352	0.00119569	0.00125821	0.00115518	0.00113504	0.00115035	0.00122251	0.00122978	0.0012486	0.00125849	0.00119038	0.00115367	0.00116754	0.00113615	0.00113	0.00119692	0.00113796	0.00113569	0.00113638	0.00119391	0.00119127	0.00118822	0.00120289	0.00121787	Biosynthesis of ansamycins	0.0165003	0.0201943
ko01053	0.000901772	0.00100416	0.00107327	0.000899662	0.00101552	0.00131672	0.00107887	0.00107711	0.000779812	0.000852829	0.000910268	0.000929495	0.000882474	0.00111157	0.00129317	0.00133669	0.00121275	0.00102857	0.00117993	0.00117562	0.00113545	0.00101821	0.00108313	0.00104175	0.00106328	0.00117578	Biosynthesis of siderophore group nonribosomal peptides	0.286063	0.0104264
ko01054	0.000587439	0.000597669	0.000739359	0.000638891	0.000646962	0.00149554	0.000855385	0.000901847	0.000484287	0.000549847	0.00063043	0.000586706	0.000646984	0.000895526	0.00156779	0.00111363	0.000977038	0.000729518	0.001036	0.000907396	0.000904294	0.000744667	0.000899874	0.000796983	0.000768993	0.00112509	Nonribosomal peptide structures	0.51879	0.0540066
ko01055	0.000521816	0.000598392	0.000591493	0.000560441	0.00063648	0.00062945	0.000572702	0.000592042	0.000604193	0.000569826	0.000573178	0.000634852	0.00056897	0.000523224	0.0006355	0.000569368	0.000577184	0.000583342	0.000638634	0.000583812	0.00060988	0.000590592	0.000587311	0.000535939	0.000559629	0.000573209	Biosynthesis of vancomycin group antibiotics	0.593995	0.649636
ko01056	0.00010531	0.000132744	0.000116204	8.04e-05	7.21e-05	0.000112588	0.000113789	0.000120402	8.61e-05	8.03e-05	7.59e-05	7.85e-05	8.05e-05	9.07e-05	9.45e-05	0.000101381	0.000100196	7.77e-05	0.000108352	0.000107286	0.00011062	8.68e-05	8.48e-05	8.15e-05	7.65e-05	8.35e-05	Biosynthesis of type II polyketide backbone	0.0165003	0.0347165
ko01057	0.000261893	0.000287048	0.000275491	0.000209279	0.00018583	0.000250824	0.000271326	0.000269803	0.000207145	0.000214306	0.000201465	0.000188224	0.000212915	0.0002562	0.000248699	0.000275737	0.000274787	0.000219593	0.000244138	0.000265695	0.000258888	0.000226891	0.000229718	0.000234628	0.000218999	0.000214297	Biosynthesis of type II polyketide products	0.0165003	0.0120554
ko02010	0.0980413	0.0926417	0.091395	0.0867854	0.0819567	0.0796984	0.0921909	0.089636	0.0847917	0.089481	0.0870023	0.0807469	0.0847823	0.10312	0.0811191	0.100988	0.102289	0.0941304	0.0887964	0.100081	0.0953832	0.0931543	0.0928855	0.101187	0.0976153	0.0918411	ABC transporters	0.0898056	0.75166
ko02020	0.0600121	0.0662524	0.0651153	0.0544582	0.0485017	0.0688433	0.0649692	0.0649083	0.0523438	0.0522193	0.049996	0.0493554	0.0554197	0.0617282	0.0691491	0.0664646	0.0652067	0.0550112	0.0662446	0.0653326	0.065327	0.0574694	0.059433	0.0563304	0.0543942	0.0585806	Two-component system	0.0174726	0.00912436
ko02030	0.00690124	0.00786248	0.00784842	0.00558284	0.00472177	0.00808107	0.00754853	0.00774914	0.00516095	0.00530744	0.00490079	0.00472437	0.00581689	0.00807133	0.00794641	0.00912931	0.0089505	0.00644242	0.00809742	0.00864626	0.00837688	0.00687302	0.00718	0.00687263	0.00650096	0.0068848	Bacterial chemotaxis	0.0194297	0.0104264
ko02040	0.0126097	0.00765381	0.00805932	0.0114794	0.00742656	0.00814316	0.00905878	0.00848858	0.0116877	0.0128119	0.0116742	0.00863021	0.0108661	0.0128834	0.00905117	0.00928211	0.0094009	0.0106679	0.00837753	0.00930927	0.00908759	0.0107413	0.0112027	0.0127135	0.0110888	0.0108432	Flagellar assembly	0.433213	0.0863359
ko02060	0.000979457	0.00100387	0.0010495	0.000826284	0.000584838	0.00101821	0.00107222	0.000996518	0.000587096	0.000773371	0.000676524	0.000557149	0.000807772	0.0011874	0.00105258	0.00128016	0.00122159	0.000843815	0.00110482	0.00118602	0.00112943	0.000872726	0.000983494	0.00097316	0.000890971	0.000972046	Phosphotransferase system (PTS)	0.0165003	0.0104264
ko03008	0.000515919	0.000535934	0.0005493	0.000635181	0.000704823	0.00066327	0.000564065	0.000584685	0.000598738	0.000590536	0.000645903	0.000693437	0.000656733	0.000516736	0.000639666	0.000525631	0.000527069	0.000588452	0.000561262	0.000528521	0.000536996	0.000569411	0.000574797	0.000544132	0.00059187	0.000615424	Ribosome biogenesis in eukaryotes	0.033354	0.245366
ko03010	0.0176584	0.0175355	0.017552	0.0196159	0.0207256	0.0177959	0.0175895	0.017912	0.01947	0.0191797	0.0198977	0.0206338	0.019751	0.0172549	0.0187495	0.0168544	0.0171675	0.0187136	0.0177441	0.0172596	0.0175336	0.0183841	0.0182184	0.0180095	0.0186497	0.0186292	Ribosome	0.0165003	0.154515
ko03013	0.00125532	0.00135979	0.00137864	0.00157829	0.00216534	0.00186582	0.00150827	0.00143976	0.00169448	0.00161246	0.00180834	0.00204804	0.00162542	0.0012305	0.00156936	0.00129136	0.00127551	0.00169933	0.00151535	0.00134137	0.00135178	0.0015784	0.00155129	0.00145655	0.00168305	0.00160243	RNA transport	0.0198906	0.0684317
ko03015	1.57e-06	2.66e-06	2.29e-06	2.95e-06	8.27e-07	3.72e-06	3.17e-06	2.58e-06	1.35e-06	1.58e-06	1.27e-06	1.35e-06	3.13e-06	2.32e-06	1.29e-05	2.74e-06	3.52e-06	1.58e-06	3.83e-06	3.37e-06	2.63e-06	1.88e-06	2.92e-06	1.49e-06	1.23e-06	4.6e-06	mRNA surveillance pathway	0.0853221	0.127392
ko03018	0.0151655	0.015939	0.0157097	0.0159434	0.0166925	0.0159764	0.015485	0.0158687	0.0163262	0.0158102	0.0160565	0.0168408	0.0161634	0.0146001	0.016205	0.0147944	0.0150548	0.0156379	0.0157689	0.0151797	0.0154407	0.0156565	0.0154282	0.0149292	0.0154245	0.0154865	RNA degradation	0.049106	0.732721
ko03020	0.00207505	0.00204214	0.00204789	0.00236926	0.00264234	0.00208787	0.00208184	0.00208813	0.00235508	0.00231357	0.00245368	0.00258186	0.00238634	0.00205376	0.00221039	0.00199725	0.00202864	0.00229978	0.0020861	0.00204571	0.00206345	0.00221898	0.00217973	0.0021822	0.00230286	0.00225572	RNA polymerase	0.0165003	0.0347165
ko03022	1.56e-05	1.4e-05	2.47e-05	2.71e-05	2e-05	5.67e-05	3.34e-05	2.64e-05	1.37e-05	1.93e-05	2.15e-05	1.83e-05	2.64e-05	2.19e-05	4.24e-05	2.82e-05	1.73e-05	1.46e-05	3.66e-05	1.86e-05	2.24e-05	1.45e-05	2.4e-05	1.47e-05	1.36e-05	2.55e-05	Basal transcription factors	0.733475	0.144314
ko03030	0.00594504	0.00612402	0.00606104	0.00629749	0.00647192	0.00613416	0.00596823	0.00613344	0.00633391	0.00619531	0.00628972	0.00651395	0.00633777	0.00579912	0.00638772	0.0058054	0.00584709	0.00606331	0.0061403	0.00591259	0.00604581	0.00607347	0.00604575	0.00587295	0.00599628	0.00609468	DNA replication	0.033354	0.598693
ko03040	1.4e-05	2.38e-05	1.27e-05	9.16e-06	1.48e-05	1.55e-05	1.66e-05	1.76e-05	1.12e-05	8.17e-06	1.22e-05	1.46e-05	9.15e-06	5.54e-06	1.48e-05	6.54e-06	6.31e-06	8.78e-06	1.03e-05	1.17e-05	1.18e-05	8.03e-06	6e-06	8.18e-06	9.69e-06	1.28e-05	Spliceosome	0.259333	0.978591
ko03050	4.02e-05	5.49e-05	5.09e-05	6.02e-05	0.000101065	5.94e-05	5.59e-05	5.68e-05	5.85e-05	5.85e-05	7.45e-05	9.06e-05	6.32e-05	3.51e-05	6.16e-05	4.55e-05	4.47e-05	6.91e-05	4.66e-05	4.8e-05	4.57e-05	6.18e-05	5.5e-05	5.32e-05	7e-05	7.97e-05	Proteasome	0.0194297	0.0684317
ko03060	0.00627405	0.0063894	0.00637871	0.00693402	0.00711419	0.00654135	0.00637458	0.00647657	0.00682625	0.0066761	0.00687987	0.00714685	0.00699173	0.0061322	0.00689634	0.00607755	0.00613433	0.00651297	0.00653742	0.00621791	0.00636412	0.00648373	0.0064569	0.00626129	0.0064472	0.00660898	Protein export	0.0384963	0.335119
ko03070	0.0108242	0.0100727	0.0109705	0.0116377	0.0102221	0.0133639	0.0116526	0.0108855	0.0100078	0.0103812	0.0106321	0.0101409	0.0114856	0.0114159	0.0136128	0.0113798	0.0104361	0.0103272	0.0115658	0.0105865	0.0107013	0.0103126	0.01102	0.0105622	0.010399	0.0118585	Bacterial secretion system	0.418315	0.243295
ko03320	0.00139122	0.00141218	0.00144087	0.00132841	0.0013895	0.00149299	0.00147355	0.00142713	0.0013376	0.00137078	0.00135824	0.00135146	0.00132566	0.00139331	0.00133433	0.00143151	0.00141804	0.00137842	0.00141504	0.00140415	0.00138853	0.00137688	0.00139576	0.00138041	0.00137965	0.00135121	PPAR signaling pathway	0.137358	0.174221
ko03410	0.00585298	0.00569072	0.00572683	0.0061959	0.00607268	0.00598898	0.00581768	0.00582802	0.00606207	0.0060602	0.00615022	0.00613737	0.0061671	0.00580045	0.00599476	0.00561895	0.00565777	0.00588072	0.00585385	0.00570222	0.00578876	0.00585635	0.00590139	0.00587329	0.00590244	0.0060382	Base excision repair	0.0444704	0.117537
ko03420	0.00992135	0.0104325	0.0105116	0.0108655	0.0112221	0.0108834	0.0102568	0.0105269	0.0108024	0.0105171	0.0107854	0.0112922	0.0109919	0.00977337	0.0110559	0.0100267	0.00997776	0.010366	0.0107198	0.0100686	0.010348	0.0104009	0.0103769	0.00988857	0.010181	0.0105349	Nucleotide excision repair	0.0852886	0.836896
ko03430	0.00913831	0.00950094	0.00946135	0.0096256	0.0100805	0.00973275	0.00924362	0.00952096	0.00978021	0.00952315	0.00970213	0.010113	0.00972326	0.00898019	0.0101536	0.00914458	0.00917091	0.00953189	0.00955391	0.00922244	0.00938641	0.00951941	0.00944378	0.00914365	0.00939848	0.00953372	Mismatch repair	0.0404242	0.758868
ko03440	0.0113479	0.0118036	0.0117409	0.0129561	0.0157064	0.0127325	0.0121349	0.0120132	0.0134205	0.0129999	0.0138674	0.0151028	0.0130481	0.0111344	0.0131548	0.0112172	0.0113613	0.0130879	0.0123058	0.011595	0.0117959	0.0125541	0.0123449	0.0120584	0.0129821	0.0127504	Homologous recombination	0.0165003	0.232362
ko03450	0.000263656	0.000342928	0.000355922	0.000272501	0.000276343	0.000374287	0.000301916	0.000332682	0.00024086	0.000235271	0.000249395	0.000270472	0.000283065	0.00029559	0.000347221	0.000385992	0.000361544	0.000279411	0.000335736	0.000342357	0.000346121	0.000293935	0.000306224	0.000279059	0.000271816	0.000314977	Non-homologous end-joining	0.0791697	0.0104264
ko03460	6.81e-06	8.24e-06	1.03e-05	6.85e-06	4.59e-06	8.09e-06	6.5e-06	8.28e-06	6.55e-06	5.86e-06	4.07e-06	4.75e-06	7.47e-06	1.13e-05	1.44e-05	1.57e-05	1.21e-05	9.81e-06	1.34e-05	1.19e-05	1.26e-05	1.25e-05	1.27e-05	7.75e-06	7.22e-06	9.97e-06	Fanconi anemia pathway	0.0282241	0.0468867
ko04011	0.000415467	0.000473854	0.000485629	0.000402702	0.000359937	0.000456997	0.000454709	0.000457498	0.000360461	0.000358277	0.000349218	0.000356492	0.000406592	0.000449662	0.000444116	0.00051445	0.000506332	0.000406912	0.000483954	0.000489815	0.000487782	0.000425097	0.000432594	0.000413767	0.000403789	0.000430816	MAPK signaling pathway - yeast	0.0165003	0.0120554
ko04020	1.83e-05	2.82e-05	2.82e-05	5.66e-05	0.000170864	4.13e-05	3.88e-05	3.15e-05	7.75e-05	6.9e-05	0.000101101	0.000140024	5.91e-05	1.77e-05	2.54e-05	2.69e-05	3.26e-05	0.000120158	3.42e-05	3.6e-05	3.05e-05	8.31e-05	6.46e-05	7.55e-05	0.000124307	7.99e-05	Calcium signaling pathway	0.0165003	0.0149194
ko04060	0	0	0	0	0	0	0	0	0	0	0	0	0	0	1.21e-09	0	0	0	0	0	0	0	0	0	0	0	Cytokine-cytokine receptor interaction	NA	0.211568
ko04064	1.26e-05	1.58e-05	1.45e-05	6.62e-06	7.42e-06	8.99e-06	1.4e-05	1.37e-05	7.08e-06	7.48e-06	6.29e-06	6.45e-06	7.1e-06	7.83e-06	4.12e-06	9.13e-06	9.88e-06	6.21e-06	7.05e-06	9.26e-06	8.48e-06	6.32e-06	5.87e-06	6.68e-06	6.49e-06	4.51e-06	NF-kappa B signaling pathway	0.0282241	0.168722
ko04070	0.000763224	0.000697882	0.000694308	0.000861177	0.000977337	0.000700325	0.000752272	0.000710016	0.000841392	0.000841362	0.000910804	0.000932547	0.000849307	0.000748847	0.000696796	0.00069188	0.000685535	0.000844771	0.000711269	0.000715486	0.000709328	0.000791121	0.000775266	0.00082074	0.000863149	0.000846277	Phosphatidylinositol signaling system	0.0194297	0.00912436
ko04080	1.22e-06	1.56e-06	1.16e-06	1.54e-06	2.76e-06	1.36e-06	1.67e-06	1.61e-06	1.48e-06	1.63e-06	2.35e-06	2.37e-06	1.55e-06	1.92e-06	2.38e-06	2e-06	2.54e-06	2.82e-06	1.85e-06	2.12e-06	1.92e-06	2.39e-06	2.09e-06	2.51e-06	3.19e-06	2.95e-06	Neuroactive ligand-receptor interaction	0.0861211	0.20736
ko04112	0.0126291	0.0126917	0.0128506	0.0131642	0.0129482	0.0127846	0.0125687	0.0128173	0.0125851	0.0125275	0.0127161	0.01284	0.0132493	0.0128103	0.0134552	0.0129632	0.0127676	0.0127295	0.0127443	0.0127318	0.0127323	0.0127242	0.0127972	0.012617	0.0127303	0.0132668	Cell cycle - Caulobacter	0.910935	0.0733446
ko04113	0.00098184	0.00120602	0.00128002	0.00113673	0.00102169	0.00124264	0.0012756	0.00119551	0.000919855	0.000892068	0.000904504	0.000976886	0.0011499	0.000983956	0.00116278	0.00118719	0.00109401	0.00102998	0.00137178	0.00117094	0.00122799	0.00104701	0.0011013	0.000956994	0.000982882	0.00125417	Meiosis - yeast	0.0282241	0.320784
ko04114	6.25e-12	4.75e-12	2.26e-11	1.19e-11	0	4.99e-12	0	5.79e-11	1.65e-11	1.74e-11	1.29e-11	4.19e-11	0	0	1.4e-10	0	0	0	0	1.97e-11	2.54e-11	0	4.88e-11	0	0	2.02e-11	Oocyte meiosis	0.915762	0.758868
ko04115	8.12e-05	9.78e-05	9.09e-05	6.51e-05	7.45e-05	7.86e-05	8.31e-05	9e-05	7.59e-05	7.08e-05	6.74e-05	7.45e-05	6.74e-05	7.35e-05	7.66e-05	8.33e-05	8.63e-05	7.62e-05	8.1e-05	8.56e-05	8.5e-05	7.95e-05	7.43e-05	7.16e-05	7.45e-05	7.08e-05	p53 signaling pathway	0.0462728	0.0468867
ko04120	0	0	0	0	0	0	0	0	0	0	0	0	0	0	1.48e-07	0	0	0	0	0	0	0	0	0	0	0	Ubiquitin mediated proteolysis	NA	0.211568
ko04122	0.0038749	0.00350869	0.00367407	0.00461314	0.00445998	0.00379639	0.00384852	0.00377669	0.00426011	0.00428064	0.00451834	0.0044986	0.00464212	0.00395055	0.00406406	0.00367882	0.00372636	0.00420669	0.00386916	0.00373761	0.00379695	0.00407653	0.00407578	0.00412803	0.00423718	0.00431889	Sulfur relay system	0.0404242	0.0108128
ko04141	0.000646489	0.000523203	0.000498362	0.000710733	0.000664287	0.000607964	0.000563989	0.000554855	0.000753332	0.000735344	0.000754957	0.000709234	0.000696057	0.00055799	0.000611614	0.000430812	0.000419431	0.000635468	0.00053558	0.000473995	0.000509259	0.000620531	0.000620677	0.00064062	0.000631073	0.000678529	Protein processing in endoplasmic reticulum	0.0246927	0.00887052
ko04142	0.000852106	0.00118676	0.00145033	0.00137522	0.000553769	0.00165752	0.0016773	0.00130396	0.000759626	0.000694297	0.000578874	0.000602783	0.00134072	0.00102683	0.00143536	0.00134881	0.00113183	0.000836788	0.00224805	0.00141854	0.00168394	0.00101496	0.00123404	0.000746819	0.000648865	0.00139914	Lysosome	0.0282241	0.13612
ko04144	4.65e-05	5.89e-05	5.44e-05	3.03e-05	3.05e-05	3.81e-05	5.22e-05	5.09e-05	2.76e-05	2.98e-05	2.69e-05	2.7e-05	3.23e-05	4.84e-05	3.1e-05	5.66e-05	5.97e-05	3.96e-05	4.45e-05	5.63e-05	5.16e-05	3.99e-05	3.9e-05	4.27e-05	4.15e-05	3.36e-05	Endocytosis	0.017658	0.154515
ko04146	0.00271995	0.00258202	0.00256584	0.00242837	0.00218508	0.00256361	0.00252897	0.00256725	0.00257929	0.00262282	0.00247325	0.00230043	0.00240994	0.00261207	0.00244772	0.0024942	0.00247386	0.00241217	0.00242432	0.00245914	0.00245617	0.00249443	0.00251297	0.00252803	0.00239968	0.00234571	Peroxisome	0.277727	0.841004
ko04210	0.00036261	0.000523385	0.000544911	0.000327273	0.000284421	0.000547981	0.000440668	0.000499943	0.000358995	0.000335941	0.000271067	0.000315295	0.000365256	0.000374886	0.000627925	0.000519938	0.000514976	0.000360297	0.00052878	0.000473448	0.000483391	0.000424499	0.000439033	0.000314886	0.000300308	0.000345464	Apoptosis	0.0342874	0.0134271
ko04260	0.000118515	9.06e-05	9.58e-05	0.000127992	9.47e-05	9.91e-05	0.000103366	0.000100453	0.000104973	0.000112216	0.000117204	9.96e-05	0.000129732	0.000120193	0.000108853	0.000100804	9.79e-05	0.000103691	8.59e-05	9.61e-05	9.29e-05	0.000101798	0.000106321	0.000114902	0.000108654	0.000113727	Cardiac muscle contraction	0.42283	0.344315
ko04270	6.25e-12	4.75e-12	2.26e-11	1.19e-11	0	4.99e-12	0	5.79e-11	1.65e-11	1.74e-11	1.29e-11	4.19e-11	0	0	1.4e-10	0	0	0	0	1.97e-11	2.54e-11	0	4.88e-11	0	0	2.02e-11	Vascular smooth muscle contraction	0.915762	0.758868
ko04310	1.35e-06	1.46e-06	1.54e-06	1.53e-06	2.14e-06	1.48e-06	1.51e-06	1.46e-06	1.21e-06	1.28e-06	1.6e-06	1.78e-06	1.51e-06	1.76e-06	1.61e-06	2.08e-06	1.92e-06	1.74e-06	1.52e-06	1.85e-06	1.67e-06	1.6e-06	1.61e-06	1.75e-06	1.85e-06	1.96e-06	Wnt signaling pathway	0.659912	0.603497
ko04330	1.35e-06	1.46e-06	1.54e-06	1.53e-06	2.14e-06	1.48e-06	1.51e-06	1.46e-06	1.21e-06	1.28e-06	1.6e-06	1.78e-06	1.51e-06	1.76e-06	1.61e-06	2.08e-06	1.92e-06	1.74e-06	1.52e-06	1.85e-06	1.67e-06	1.6e-06	1.61e-06	1.75e-06	1.85e-06	1.96e-06	Notch signaling pathway	0.659912	0.603497
ko04370	1.26e-05	1.58e-05	1.45e-05	6.92e-06	8.63e-06	9.1e-06	1.41e-05	1.37e-05	7.55e-06	7.92e-06	6.99e-06	7.42e-06	7.42e-06	7.84e-06	4.22e-06	9.16e-06	1e-05	7.12e-06	7.11e-06	9.39e-06	8.53e-06	6.88e-06	6.27e-06	7.22e-06	7.45e-06	5.04e-06	VEGF signaling pathway	0.0548937	0.248668
ko04510	1.8e-05	2.67e-05	2.61e-05	1.32e-05	1.54e-05	2.65e-05	2.11e-05	2.58e-05	1.94e-05	1.65e-05	1.26e-05	1.73e-05	1.48e-05	1.7e-05	3e-05	2.54e-05	2.5e-05	1.75e-05	2.81e-05	2.54e-05	2.63e-05	2.3e-05	2.25e-05	1.39e-05	1.4e-05	1.48e-05	Focal adhesion	0.0374135	0.0266076
ko04512	1.8e-05	2.67e-05	2.61e-05	1.32e-05	1.54e-05	2.65e-05	2.11e-05	2.58e-05	1.94e-05	1.65e-05	1.26e-05	1.73e-05	1.48e-05	1.7e-05	3e-05	2.54e-05	2.5e-05	1.75e-05	2.81e-05	2.54e-05	2.63e-05	2.3e-05	2.25e-05	1.39e-05	1.4e-05	1.48e-05	ECM-receptor interaction	0.0374135	0.0266076
ko04514	4.05e-06	6.66e-06	3.81e-06	1.82e-06	1.11e-06	3.98e-06	3.99e-06	4.96e-06	2.43e-06	1.32e-06	1.57e-06	1.64e-06	1.92e-06	1.81e-06	2.21e-06	2.17e-06	1.68e-06	9.76e-07	2.87e-06	3e-06	3.53e-06	1.58e-06	1.26e-06	1.45e-06	9.29e-07	2.06e-06	Cell adhesion molecules (CAMs)	0.0282241	0.0826852
ko04610	4.24e-05	5.26e-05	4.88e-05	2.32e-05	2.34e-05	3.31e-05	4.46e-05	4.5e-05	2.36e-05	2.55e-05	2.15e-05	2.08e-05	2.54e-05	7.42e-05	4.22e-05	8.66e-05	8.79e-05	5.65e-05	6.75e-05	8.45e-05	7.83e-05	5.87e-05	5.56e-05	6.03e-05	5.72e-05	4.35e-05	Complement and coagulation cascades	0.0335477	0.163318
ko04612	0.00010613	0.000149247	0.000150179	0.000127952	0.000171645	0.00017649	0.000140518	0.000152883	0.000139293	0.000121128	0.000131467	0.000169597	0.00013712	9e-05	0.000154963	0.000116439	0.000122825	0.000120019	0.000144825	0.000120648	0.000130708	0.000122702	0.000117532	9.33e-05	0.00011373	0.000117118	Antigen processing and presentation	0.927852	0.313394
ko04614	0.000147547	0.000227897	0.000197539	9.6e-05	6.95e-05	0.000223137	0.000162527	0.000197475	0.000115051	8.88e-05	7.85e-05	9.1e-05	0.000102976	0.000114601	0.000183227	0.000163381	0.000138749	8.3e-05	0.00017194	0.000151319	0.000170731	0.000114866	0.000115686	7.61e-05	6.65e-05	0.000104812	Renin-angiotensin system	0.0165003	0.0210798
ko04621	0.000312022	0.000473499	0.000375012	0.000220981	0.000235381	0.000387684	0.000337197	0.000393513	0.000269604	0.000200405	0.000206704	0.000253789	0.000239184	0.000249998	0.00032085	0.000340316	0.000265045	0.000231376	0.000365748	0.000327476	0.000362728	0.000282459	0.000254866	0.000197707	0.000194841	0.000250872	NOD-like receptor signaling pathway	0.041563	0.0722025
ko04622	0.000103483	0.00012272	0.000121532	7.43e-05	5.82e-05	7.49e-05	0.000104896	0.000107224	5.42e-05	6.28e-05	5.67e-05	5.24e-05	7.41e-05	6.72e-05	5.7e-05	8.38e-05	7.46e-05	4.8e-05	5.81e-05	7.04e-05	6.59e-05	5.11e-05	5.64e-05	5.63e-05	5.07e-05	6.73e-05	RIG-I-like receptor signaling pathway	0.0165003	0.0378839
ko04626	0.00253236	0.00237193	0.00242935	0.00254733	0.00223956	0.0025002	0.00241196	0.00243798	0.00248647	0.00250687	0.00245779	0.00234275	0.00255193	0.00251908	0.00257157	0.00241278	0.00237868	0.002384	0.0023966	0.00236651	0.00239928	0.0024296	0.0024785	0.0024411	0.00236751	0.00245053	Plant-pathogen interaction	0.90697	0.887665
ko04640	0.000101202	0.000158776	0.000156391	7.51e-05	4.9e-05	0.000169398	0.00011515	0.000143781	8.96e-05	7.37e-05	5.62e-05	6.84e-05	8.34e-05	9.22e-05	0.000156111	0.00013732	0.000123487	7.11e-05	0.000142673	0.000119651	0.000134602	9.83e-05	0.000102036	5.99e-05	5.34e-05	7.68e-05	Hematopoietic cell lineage	0.0194297	0.0149194
ko04666	4.66e-05	5.9e-05	5.45e-05	3.08e-05	3.19e-05	3.83e-05	5.24e-05	5.11e-05	2.81e-05	3.03e-05	2.77e-05	2.8e-05	3.28e-05	4.85e-05	3.13e-05	5.68e-05	6e-05	4.06e-05	4.47e-05	5.65e-05	5.17e-05	4.06e-05	3.95e-05	4.34e-05	4.25e-05	3.44e-05	Fc gamma R-mediated phagocytosis	0.017658	0.161595
ko04720	6.25e-12	4.75e-12	2.26e-11	1.19e-11	0	4.99e-12	0	5.79e-11	1.65e-11	1.74e-11	1.29e-11	4.19e-11	0	0	1.4e-10	0	0	0	0	1.97e-11	2.54e-11	0	4.88e-11	0	0	2.02e-11	Long-term potentiation	0.915762	0.758868
ko04721	1.91e-05	2.65e-05	2.14e-05	3.28e-05	9.55e-05	2.84e-05	2.95e-05	2.58e-05	4.52e-05	4.06e-05	5.88e-05	7.85e-05	3.43e-05	1.49e-05	1.92e-05	1.89e-05	2.16e-05	5.51e-05	1.96e-05	2.42e-05	2.08e-05	3.96e-05	3.14e-05	3.89e-05	5.8e-05	4.04e-05	Synaptic vesicle cycle	0.0165003	0.0149194
ko04722	6.25e-12	4.75e-12	2.26e-11	1.19e-11	0	4.99e-12	0	5.79e-11	1.65e-11	1.74e-11	1.29e-11	4.19e-11	0	0	1.4e-10	0	0	0	0	1.97e-11	2.54e-11	0	4.88e-11	0	0	2.02e-11	Neurotrophin signaling pathway	0.915762	0.758868
ko04723	0.000225722	0.000210065	0.000207119	0.000193393	0.00013859	0.000253032	0.000195601	0.000230473	0.000228628	0.000215779	0.000187858	0.000171481	0.000186569	0.000200444	0.000235751	0.000185739	0.000186391	0.000169722	0.000212809	0.000192016	0.000207364	0.000203223	0.000207556	0.000182378	0.000162572	0.000189924	Retrograde endocannabinoid signaling	0.343432	0.353626
ko04724	0.00052792	0.000504668	0.000504605	0.000496725	0.000443693	0.000454193	0.00049549	0.000501318	0.000502494	0.000507693	0.000481245	0.000456971	0.000490921	0.000513402	0.000445474	0.000491228	0.000505154	0.000489262	0.000483434	0.000497297	0.000497645	0.00049762	0.000494473	0.000508183	0.000491632	0.000477582	Glutamatergic synapse	0.152001	0.825431
ko04725	2.76e-05	4.3e-05	3.88e-05	2.64e-05	1.36e-05	5.28e-05	3.83e-05	4.31e-05	2.52e-05	1.97e-05	1.48e-05	1.96e-05	2.89e-05	2.12e-05	2.97e-05	2.69e-05	2.73e-05	1.32e-05	4.22e-05	3.07e-05	3.7e-05	2.03e-05	2.36e-05	1.31e-05	1.17e-05	2.68e-05	Cholinergic synapse	0.033354	0.0592431
ko04726	4.16e-05	5.44e-05	5.5e-05	3.67e-05	4.9e-05	4.96e-05	5.16e-05	5.28e-05	3.91e-05	3.76e-05	3.8e-05	4.46e-05	3.88e-05	3.86e-05	4.1e-05	4.97e-05	5.29e-05	4.63e-05	4.67e-05	4.91e-05	4.75e-05	4.47e-05	4.22e-05	4.11e-05	4.57e-05	4.02e-05	Serotonergic synapse	0.105145	0.245366
ko04727	0.000638828	0.000516388	0.00052876	0.000652897	0.000621172	0.000510603	0.000546804	0.000542787	0.000689315	0.000699744	0.000683775	0.000639551	0.000633756	0.000606287	0.000527853	0.000513549	0.000524974	0.000639974	0.000527463	0.000530255	0.000534966	0.000628437	0.000621291	0.000655062	0.000644342	0.000619227	GABAergic synapse	0.0955081	0.00619055
ko04728	2.95e-05	3.98e-05	4.16e-05	2.9e-05	3.51e-05	3.93e-05	3.71e-05	3.94e-05	3.03e-05	2.84e-05	2.81e-05	3.35e-05	3.06e-05	3.09e-05	3.62e-05	4.07e-05	4.34e-05	3.56e-05	4.01e-05	4e-05	3.99e-05	3.62e-05	3.46e-05	3.19e-05	3.44e-05	3.3e-05	Dopaminergic synapse	0.082681	0.0524485
ko04740	6.25e-12	4.75e-12	2.26e-11	1.19e-11	0	4.99e-12	0	5.79e-11	1.65e-11	1.74e-11	1.29e-11	4.19e-11	0	0	1.4e-10	0	0	0	0	1.97e-11	2.54e-11	0	4.88e-11	0	0	2.02e-11	Olfactory transduction	0.915762	0.758868
ko04744	6.25e-12	4.75e-12	2.26e-11	1.19e-11	0	4.99e-12	0	5.79e-11	1.65e-11	1.74e-11	1.29e-11	4.19e-11	0	0	1.4e-10	0	0	0	0	1.97e-11	2.54e-11	0	4.88e-11	0	0	2.02e-11	Phototransduction	0.915762	0.758868
ko04745	6.25e-12	4.75e-12	2.26e-11	1.19e-11	0	4.99e-12	0	5.79e-11	1.65e-11	1.74e-11	1.29e-11	4.19e-11	0	0	1.4e-10	0	0	0	0	1.97e-11	2.54e-11	0	4.88e-11	0	0	2.02e-11	Phototransduction - fly	0.915762	0.758868
ko04810	4.05e-06	6.66e-06	3.81e-06	1.82e-06	1.11e-06	3.98e-06	3.99e-06	4.96e-06	2.43e-06	1.32e-06	1.57e-06	1.64e-06	1.92e-06	1.81e-06	2.21e-06	2.17e-06	1.68e-06	9.76e-07	2.87e-06	3e-06	3.53e-06	1.58e-06	1.26e-06	1.45e-06	9.29e-07	2.06e-06	Regulation of actin cytoskeleton	0.0282241	0.0826852
ko04910	0.000506487	0.000658348	0.000589669	0.000638667	0.00117646	0.000628202	0.000674261	0.000622922	0.000706763	0.000662322	0.00082347	0.00101381	0.000657139	0.000458366	0.000520116	0.000536552	0.000546729	0.000823531	0.000610228	0.000604977	0.000586315	0.00069541	0.000631341	0.00066136	0.000840027	0.000733465	Insulin signaling pathway	0.0526799	0.0104264
ko04912	4.65e-05	5.89e-05	5.44e-05	3.03e-05	3.05e-05	3.81e-05	5.22e-05	5.09e-05	2.76e-05	2.98e-05	2.69e-05	2.7e-05	3.23e-05	4.84e-05	3.1e-05	5.66e-05	5.97e-05	3.96e-05	4.45e-05	5.63e-05	5.16e-05	3.99e-05	3.9e-05	4.27e-05	4.15e-05	3.36e-05	GnRH signaling pathway	0.017658	0.154515
ko04914	0.00010613	0.000149247	0.000150179	0.000127952	0.000171645	0.00017649	0.000140518	0.000152883	0.000139293	0.000121128	0.000131467	0.000169597	0.00013712	9e-05	0.000154963	0.000116439	0.000122825	0.000120019	0.000144825	0.000120648	0.000130708	0.000122702	0.000117532	9.33e-05	0.00011373	0.000117118	Progesterone-mediated oocyte maturation	0.927852	0.313394
ko04916	6.42e-06	6.41e-06	7.44e-06	4.57e-06	5.04e-06	7.32e-06	6.47e-06	6.79e-06	5.57e-06	5.44e-06	4.07e-06	4.7e-06	4.77e-06	9.05e-06	8.71e-06	1.15e-05	8.92e-06	8.24e-06	1.03e-05	9.9e-06	9.51e-06	1.09e-05	1.1e-05	6.77e-06	7.14e-06	7.58e-06	Melanogenesis	0.0791697	0.215459
ko04920	0.000686229	0.000707943	0.000691533	0.000595241	0.000607408	0.000681206	0.000696495	0.000685792	0.000618811	0.000636023	0.000620162	0.000599209	0.000595332	0.000664522	0.000600512	0.000673859	0.00067102	0.000622092	0.000633319	0.00066408	0.00064648	0.000628168	0.000628949	0.00064446	0.000628821	0.000599625	Adipocytokine signaling pathway	0.0719851	0.125072
ko04930	0.000178615	0.000185686	0.000185527	0.000202983	0.000250639	0.000197451	0.000190704	0.000190791	0.000210274	0.00020592	0.000220851	0.000240697	0.000207446	0.000182537	0.000192512	0.000189001	0.000190936	0.000215725	0.000197713	0.000193721	0.000193356	0.000207921	0.000202818	0.00019886	0.00021506	0.000205104	Type II diabetes mellitus	0.0165003	0.0112129
ko04940	0.000323503	0.000331245	0.000331798	0.000406605	0.00055585	0.00034221	0.000346183	0.000340014	0.000411593	0.000401051	0.00045816	0.000512598	0.000411101	0.000318845	0.000352464	0.000324775	0.000331718	0.000427482	0.000331622	0.00033502	0.000329177	0.000388154	0.000369664	0.000382426	0.000433368	0.000409921	Type I diabetes mellitus	0.0165003	0.0330441
ko04960	3.67e-06	4.37e-06	4.79e-06	4.81e-06	6.12e-06	5.93e-06	4.52e-06	4.47e-06	4.23e-06	4.84e-06	4.55e-06	5.45e-06	6.31e-06	4.95e-06	9.54e-06	6.52e-06	5.29e-06	6.5e-06	6.26e-06	5.66e-06	5.15e-06	6.85e-06	7.74e-06	4.8e-06	6.02e-06	7.85e-06	Aldosterone-regulated sodium reabsorption	0.257244	0.879781
ko04961	3.73e-06	4.41e-06	4.88e-06	5.03e-06	6.23e-06	6.02e-06	4.57e-06	4.66e-06	4.26e-06	4.88e-06	4.66e-06	5.5e-06	6.49e-06	5.02e-06	9.85e-06	6.61e-06	5.33e-06	6.55e-06	6.33e-06	5.71e-06	5.19e-06	6.91e-06	7.86e-06	4.89e-06	6.09e-06	8.19e-06	Endocrine and other factor-regulated calcium reabsorption	0.345441	0.879781
ko04962	1.91e-05	2.65e-05	2.14e-05	3.28e-05	9.55e-05	2.84e-05	2.95e-05	2.58e-05	4.52e-05	4.06e-05	5.88e-05	7.85e-05	3.43e-05	1.49e-05	1.92e-05	1.89e-05	2.16e-05	5.51e-05	1.96e-05	2.42e-05	2.08e-05	3.96e-05	3.14e-05	3.89e-05	5.8e-05	4.04e-05	Vasopressin-regulated water reabsorption	0.0165003	0.0149194
ko04964	0.00017946	0.000219013	0.000206739	0.000164646	0.000109757	0.000204749	0.000195822	0.000204054	0.000158707	0.000145969	0.000128659	0.000127458	0.000165932	0.000158596	0.000188113	0.000176871	0.000165444	0.000133558	0.000212332	0.000179603	0.000198369	0.00015687	0.000164784	0.000136113	0.000121512	0.000163893	Proximal tubule bicarbonate reclamation	0.0165003	0.0490231
ko04970	3.67e-06	4.37e-06	4.79e-06	4.81e-06	6.12e-06	5.93e-06	4.52e-06	4.47e-06	4.23e-06	4.84e-06	4.55e-06	5.45e-06	6.31e-06	4.95e-06	9.54e-06	6.52e-06	5.29e-06	6.5e-06	6.26e-06	5.66e-06	5.15e-06	6.85e-06	7.74e-06	4.8e-06	6.02e-06	7.85e-06	Salivary secretion	0.257244	0.879781
ko04971	3.67e-06	4.37e-06	4.79e-06	4.81e-06	6.12e-06	5.93e-06	4.52e-06	4.47e-06	4.23e-06	4.84e-06	4.55e-06	5.45e-06	6.31e-06	4.95e-06	9.54e-06	6.52e-06	5.29e-06	6.5e-06	6.26e-06	5.66e-06	5.15e-06	6.85e-06	7.74e-06	4.8e-06	6.02e-06	7.85e-06	Gastric acid secretion	0.257244	0.879781
ko04972	4.68e-06	5.55e-06	6.02e-06	6.29e-06	8.86e-06	7.17e-06	5.89e-06	5.88e-06	5.59e-06	6.25e-06	6.48e-06	7.69e-06	7.74e-06	6.78e-06	1.19e-05	8.53e-06	7.48e-06	9.27e-06	7.93e-06	7.73e-06	6.96e-06	9.14e-06	9.79e-06	7.19e-06	9.05e-06	1.06e-05	Pancreatic secretion	0.082681	0.75166
ko04973	0.00013394	0.000208712	0.000243464	0.000128257	0.000130464	0.000246789	0.000159296	0.000229482	0.000172202	0.000152476	0.000108716	0.000155833	0.000145585	0.000141327	0.000231501	0.00021317	0.00023135	0.000150218	0.000241868	0.000202947	0.000224593	0.000192328	0.00019531	0.000115123	0.000125062	0.000144898	Carbohydrate digestion and absorption	0.133308	0.0350475
ko04974	0.00106295	0.0017526	0.00161697	0.000818241	0.000614409	0.00170194	0.00124865	0.00154439	0.000956758	0.000762158	0.000618709	0.000775539	0.000922092	0.000941836	0.00168459	0.00140679	0.00128095	0.000796995	0.00149777	0.00129612	0.00141431	0.0010366	0.00104688	0.000675922	0.000625608	0.000899411	Protein digestion and absorption	0.0165003	0.0210798
ko04975	7.36e-07	1.2e-06	1.38e-06	1.18e-06	5.45e-07	1.23e-06	9.59e-07	1.42e-06	7.03e-07	6.51e-07	6.29e-07	5.93e-07	1.28e-06	9.77e-07	1.68e-06	1.5e-06	1.47e-06	9.52e-07	1.62e-06	1.29e-06	1.49e-06	1.14e-06	1.26e-06	9.38e-07	6.8e-07	1.56e-06	Fat digestion and absorption	0.0852886	0.0932125
ko04976	0.000116073	5.81e-05	6.2e-05	0.000134303	8.39e-05	7.45e-05	7.99e-05	7.07e-05	0.000124505	0.000137919	0.000130759	9.82e-05	0.000124543	0.000108022	0.000112153	5.89e-05	6.09e-05	9.96e-05	6.89e-05	6.6e-05	6.4e-05	9.86e-05	0.000107795	0.000117527	0.000103458	0.000117048	Bile secretion	0.0861211	0.112367
ko04978	0.000203174	0.000298514	0.000286877	0.000232531	0.000381965	0.000290957	0.000251853	0.000277799	0.00025872	0.000230531	0.000270945	0.000345718	0.000250694	0.000192219	0.000277212	0.000266802	0.000258781	0.000283168	0.000253613	0.000255721	0.000261487	0.000258481	0.0002487	0.000229559	0.000274265	0.000262441	Mineral absorption	0.928172	0.758868
ko05010	0.00108662	0.00123456	0.00121347	0.000997526	0.000975235	0.0011658	0.00109324	0.00119384	0.00107992	0.00102534	0.000971682	0.00102476	0.00102939	0.00105116	0.00114765	0.00114841	0.00115411	0.00102726	0.00115413	0.00113061	0.0011654	0.00109081	0.00106999	0.000986997	0.000986305	0.000970158	Alzheimers disease	0.0206161	0.0412534
ko05012	0.000196325	0.00017334	0.000177525	0.000206194	0.000184718	0.000170182	0.000184123	0.000180204	0.000183924	0.000189065	0.00019704	0.000184178	0.000208108	0.000193609	0.000172257	0.000176893	0.000174112	0.000185891	0.000159726	0.000172114	0.000169387	0.000180336	0.000180475	0.000192747	0.000191564	0.000193132	Parkinsons disease	0.149466	0.112367
ko05014	0.000227267	0.000291781	0.000286807	0.000182836	0.000175993	0.000308423	0.00024753	0.000286383	0.000207206	0.000192489	0.000168812	0.000189716	0.000191534	0.00024377	0.000285892	0.000299168	0.000296329	0.000215432	0.000294237	0.000287099	0.000291656	0.000248308	0.000250614	0.000207464	0.000204739	0.00021492	Amyotrophic lateral sclerosis (ALS)	0.0292344	0.018814
ko05016	0.000514032	0.00052293	0.000549416	0.000498529	0.000427714	0.000537021	0.00049848	0.00051779	0.000481188	0.000479554	0.000460335	0.00044534	0.000503997	0.000531893	0.000532827	0.000562054	0.000527303	0.000489048	0.000527178	0.000517101	0.000526109	0.000508794	0.000512724	0.000488784	0.000475742	0.000502779	Huntingtons disease	0.0206161	0.00619055
ko05020	3.36e-05	4.62e-05	5.43e-05	3.43e-05	3.77e-05	5.79e-05	3.85e-05	4.84e-05	3.94e-05	3.61e-05	3.07e-05	3.97e-05	3.63e-05	4.04e-05	5.02e-05	5.68e-05	5.53e-05	4.14e-05	5.46e-05	4.89e-05	5.21e-05	4.84e-05	4.9e-05	3.5e-05	3.69e-05	3.92e-05	Prion diseases	0.215873	0.0247654
ko05030	2.87e-05	3.85e-05	4.01e-05	2.82e-05	3.45e-05	3.78e-05	3.62e-05	3.81e-05	2.93e-05	2.75e-05	2.76e-05	3.27e-05	2.98e-05	3.02e-05	3.5e-05	3.96e-05	4.21e-05	3.5e-05	3.87e-05	3.89e-05	3.86e-05	3.52e-05	3.37e-05	3.13e-05	3.39e-05	3.24e-05	Cocaine addiction	0.0935839	0.0677646
ko05031	2.87e-05	3.85e-05	4.01e-05	2.82e-05	3.45e-05	3.78e-05	3.62e-05	3.81e-05	2.93e-05	2.75e-05	2.76e-05	3.27e-05	2.98e-05	3.02e-05	3.5e-05	3.96e-05	4.21e-05	3.5e-05	3.87e-05	3.89e-05	3.86e-05	3.52e-05	3.37e-05	3.13e-05	3.39e-05	3.24e-05	Amphetamine addiction	0.0935839	0.0677646
ko05032	0.000114877	0.000101145	9.34e-05	0.000111986	0.000106484	9.21e-05	0.000107818	0.000100385	0.000105472	0.000109925	0.00011358	0.0001039	0.000112079	0.000125152	9.88e-05	0.000112649	0.000116072	0.000124688	0.000105749	0.000119402	0.000115368	0.000118056	0.000117532	0.000132131	0.000131617	0.000133434	Morphine addiction	0.262709	0.0302223
ko05034	0.000125648	0.000120285	0.000117464	0.000136005	0.000129361	0.00013121	0.000127683	0.000122118	0.000141244	0.000137172	0.000135704	0.000133109	0.000135682	0.000118006	0.000148379	0.000108193	0.00010853	0.000134057	0.000131536	0.000115596	0.000122559	0.000132283	0.000134898	0.000129081	0.000129148	0.000135824	Alcoholism	0.062606	0.188502
ko05100	0.00147981	0.0021204	0.00159853	0.00105577	0.000788145	0.00194798	0.00173218	0.00181269	0.00129091	0.00110506	0.00091	0.00103443	0.00109674	0.00115074	0.00314513	0.00127006	0.00145433	0.000927967	0.00181349	0.00162602	0.00162809	0.00119831	0.00124962	0.000912033	0.000827221	0.00120475	Bacterial invasion of epithelial cells	0.0285912	0.0378839
ko05110	0.000144387	0.000224789	0.000185515	0.000107507	9.96e-05	0.00027034	0.000195358	0.000206003	0.000120181	9.71e-05	9.51e-05	0.000113998	0.000114951	0.000118208	0.000231283	0.000144052	0.000137698	9.32e-05	0.000187601	0.000158594	0.000166253	0.000112786	0.000120319	8.79e-05	8.61e-05	0.00012034	Vibrio cholerae infection	0.0342874	0.0308207
ko05111	0.00295363	0.00295775	0.00299801	0.00295801	0.00390843	0.00384337	0.00328091	0.00309248	0.00307922	0.0031305	0.00341242	0.00358396	0.00295316	0.00328424	0.00355248	0.00343334	0.00319553	0.00348502	0.00318425	0.00320195	0.00306733	0.00326706	0.00332397	0.00338945	0.003585	0.00338463	Vibrio cholerae pathogenic cycle	0.24726	0.75166
ko05120	0.000451933	0.000545417	0.000650264	0.000695904	0.00064157	0.000641501	0.000646413	0.000565044	0.000394712	0.000406683	0.00050896	0.000558502	0.000704285	0.000620783	0.000600847	0.000751443	0.000625395	0.000636754	0.000770879	0.0006578	0.000670698	0.000574596	0.000591809	0.000569187	0.000641841	0.000788054	Epithelial cell signaling in Helicobacter pylori infection	0.478609	0.553041
ko05130	1.9e-05	2.24e-06	3.9e-06	2.05e-05	1.16e-05	7.67e-06	8.1e-06	6.25e-06	2.33e-05	2.98e-05	2.34e-05	1.56e-05	1.82e-05	1.64e-05	9.9e-06	3.06e-06	3.62e-06	1.55e-05	5.62e-06	4.72e-06	5.47e-06	1.49e-05	1.57e-05	1.96e-05	1.61e-05	1.55e-05	Pathogenic Escherichia coli infection	0.0582231	0.0313331
ko05131	1.52e-05	8.76e-06	1.95e-05	2.52e-05	7.61e-06	3.17e-05	1.14e-05	1.29e-05	3.93e-06	1.61e-05	1.15e-05	7.08e-06	1.96e-05	2.02e-05	3.7e-05	2.75e-05	6.82e-06	7.09e-06	1.31e-05	8.02e-06	7.35e-06	9.48e-06	1.9e-05	1.3e-05	8.53e-06	3.78e-05	Shigellosis	0.468104	0.758868
ko05132	0.000942224	0.000870638	0.000886838	0.00108917	0.00153079	0.000993468	0.00103402	0.000912198	0.00110404	0.00113232	0.00127306	0.00136467	0.00107873	0.00106885	0.00101827	0.00103889	0.00103143	0.00133984	0.00102073	0.00105668	0.000996586	0.00116957	0.00112389	0.00123539	0.00138682	0.00123789	Salmonella infection	0.0165003	0.0228794
ko05133	0.00167078	0.00154583	0.00195873	0.00157972	0.00136002	0.00341709	0.00194726	0.0018097	0.00132906	0.00145154	0.00150378	0.00139465	0.00155933	0.00179545	0.00250884	0.00210171	0.00148664	0.00137896	0.00176456	0.00150175	0.00147988	0.00145608	0.00173473	0.00142538	0.00134606	0.001802	Pertussis	0.0478371	0.0642111
ko05134	0.00239413	0.00222054	0.00221933	0.00265571	0.00267843	0.00225624	0.00228854	0.00231026	0.00260211	0.00260448	0.00268382	0.00269059	0.00264401	0.00231874	0.00242611	0.00212802	0.00220505	0.00247589	0.00224638	0.0022066	0.00225372	0.00241716	0.00240906	0.00243954	0.00249107	0.00253824	Legionellosis	0.0194297	0.0247654
ko05140	1.26e-05	1.58e-05	1.45e-05	6.62e-06	7.42e-06	8.99e-06	1.4e-05	1.37e-05	7.08e-06	7.48e-06	6.29e-06	6.45e-06	7.1e-06	7.83e-06	4.12e-06	9.13e-06	9.88e-06	6.21e-06	7.05e-06	9.26e-06	8.48e-06	6.32e-06	5.87e-06	6.68e-06	6.49e-06	4.51e-06	Leishmaniasis	0.0282241	0.168722
ko05142	0.000442695	0.000690446	0.000631783	0.000352587	0.000272678	0.000656203	0.000485272	0.000631701	0.0003926	0.000312944	0.000268797	0.000330526	0.00037277	0.000356538	0.000628746	0.000522182	0.000481059	0.000300093	0.000569668	0.000494588	0.000554857	0.000400638	0.000401307	0.000268943	0.000246489	0.000376745	Chagas disease (American trypanosomiasis)	0.0165003	0.0292975
ko05143	0.000403714	0.000625825	0.000599827	0.000343923	0.000259213	0.000615564	0.000446351	0.000589039	0.000370971	0.00030395	0.000253142	0.000312496	0.000364196	0.000350396	0.000631466	0.000515725	0.000483993	0.000299108	0.000554573	0.000477544	0.000532243	0.000396306	0.000401471	0.000265787	0.00024588	0.000377351	African trypanosomiasis	0.0165003	0.0281693
ko05145	7.61e-05	8.87e-05	8.37e-05	6.67e-05	7.33e-05	6.96e-05	7.86e-05	8.08e-05	7.05e-05	6.65e-05	6.63e-05	7.09e-05	6.83e-05	6.91e-05	5.86e-05	7.66e-05	7.53e-05	7.35e-05	7.36e-05	7.64e-05	7.74e-05	7.39e-05	6.97e-05	6.95e-05	7.26e-05	7.02e-05	Toxoplasmosis	0.0432809	0.517129
ko05146	0.00014812	0.000198924	0.000179481	0.000127229	0.000203299	0.000181235	0.000180063	0.000178354	0.000142902	0.00013429	0.00015027	0.00018273	0.000131923	0.000152696	0.00018984	0.000193269	0.00019591	0.000178595	0.000176337	0.000196642	0.000183469	0.000173235	0.000161604	0.000160599	0.0001818	0.000166907	Amoebiasis	0.749971	0.0378839
ko05150	0.000481546	0.000661117	0.000606618	0.000383624	0.000316123	0.000675917	0.00052857	0.000611577	0.00036077	0.000317714	0.000316267	0.000340781	0.000395873	0.000519329	0.000658466	0.000670099	0.000628141	0.000417916	0.000635622	0.000633218	0.00063326	0.000482562	0.000485874	0.000437978	0.000406278	0.00051795	Staphylococcus aureus infection	0.0184412	0.0104264
ko05152	0.00147952	0.00133322	0.00135417	0.00187593	0.00263822	0.00146341	0.0015143	0.00141258	0.00198091	0.00196271	0.00222596	0.00242951	0.00187188	0.00146474	0.00152637	0.00135468	0.00140326	0.0020417	0.00141144	0.00142903	0.00139039	0.00180344	0.00170777	0.00183449	0.00208662	0.00187532	Tuberculosis	0.0165003	0.0201943
ko05160	6.76e-10	1.46e-10	3.99e-09	5.21e-09	2.2e-08	3.07e-10	8.02e-09	2.07e-08	2.25e-09	1.27e-09	8.87e-10	2.79e-09	1.76e-09	4.98e-09	7.75e-09	1.83e-09	1.69e-08	6.92e-09	9.84e-09	2.93e-09	1.92e-09	9.1e-09	1.09e-08	4.99e-09	2.5e-09	1.92e-09	Hepatitis C	0.857207	0.924555
ko05162	6.76e-10	1.46e-10	3.99e-09	5.21e-09	2.2e-08	3.07e-10	8.02e-09	2.07e-08	2.25e-09	1.27e-09	8.87e-10	2.79e-09	1.76e-09	4.98e-09	7.75e-09	1.83e-09	1.69e-08	6.92e-09	9.84e-09	2.93e-09	1.92e-09	9.1e-09	1.09e-08	4.99e-09	2.5e-09	1.92e-09	Measles	0.857207	0.924555
ko05164	0.000119252	0.000154081	0.000172224	0.000123876	0.00010811	0.000184421	0.000159246	0.000175334	0.000140462	0.000124072	9.52e-05	0.000130195	0.000121355	0.000112401	0.000104399	0.000119781	0.000167232	0.000100699	0.000202858	0.00015568	0.000179371	0.00012622	0.000126737	9.03e-05	0.000102347	0.000107854	Influenza A	0.0648306	0.20736
ko05168	5.49e-05	5.44e-05	5.27e-05	4.85e-05	6.25e-05	4.01e-05	5.35e-05	5.17e-05	5.29e-05	5.35e-05	5.48e-05	5.7e-05	4.89e-05	5.17e-05	3.79e-05	5.15e-05	5.49e-05	5.94e-05	4.38e-05	5.3e-05	4.95e-05	5.53e-05	5.14e-05	5.73e-05	6.14e-05	5.24e-05	Herpes simplex infection	0.42283	0.113136
ko05169	3.8e-09	5.14e-08	6.23e-08	4.39e-08	7.59e-09	7.16e-08	8.03e-09	1.91e-07	1.51e-09	1.03e-07	5.49e-09	2.38e-09	4.64e-08	6.42e-09	1.6e-07	1.15e-08	4.1e-07	2.07e-09	1.04e-08	2.68e-08	2.1e-07	2.09e-09	3.07e-09	8.35e-09	1.89e-09	1.42e-07	Epstein-Barr virus infection	0.422863	0.112343
ko05200	0.000370759	0.000492542	0.000469161	0.000360017	0.000502937	0.000477651	0.000439834	0.000472696	0.000401462	0.00036425	0.000385662	0.000473513	0.000378835	0.000344496	0.000466916	0.000428659	0.000442978	0.000405376	0.000438048	0.00043521	0.000436418	0.000408941	0.000388424	0.000351082	0.00039537	0.000378966	Pathways in cancer	0.90697	0.0432142
ko05202	6.15e-06	7.28e-06	7.25e-06	3.74e-06	4.25e-06	5.9e-06	6.64e-06	6.75e-06	4.27e-06	4.4e-06	3.56e-06	3.82e-06	4.23e-06	8.15e-06	6.12e-06	9.93e-06	9.29e-06	7.03e-06	8.38e-06	9.58e-06	8.84e-06	7.85e-06	7.86e-06	6.72e-06	6.67e-06	5.66e-06	Transcriptional misregulation in cancer	0.033354	0.0977804
ko05203	0.000275538	0.000267436	0.000262873	0.000310727	0.000345452	0.000290881	0.000282177	0.000274831	0.000322194	0.000315582	0.000328964	0.000341106	0.000313326	0.000270374	0.000305939	0.000257563	0.000257349	0.000314772	0.000290508	0.000270394	0.000277303	0.000304933	0.000304045	0.000296582	0.000310285	0.000308466	Viral carcinogenesis	0.0165003	0.0549625
ko05204	0.000807284	0.000627505	0.00063978	0.000807185	0.000882373	0.000655865	0.000720448	0.000656771	0.000820339	0.000870805	0.000905962	0.000844439	0.000778842	0.000794038	0.000625425	0.000674907	0.000682792	0.000833553	0.000591079	0.000673765	0.00062757	0.000772206	0.000764737	0.000873187	0.000877273	0.000786873	Chemical carcinogenesis	0.0165003	0.0412534
ko05210	5.49e-05	5.44e-05	5.27e-05	4.85e-05	6.25e-05	4.01e-05	5.35e-05	5.17e-05	5.29e-05	5.35e-05	5.48e-05	5.7e-05	4.89e-05	5.17e-05	3.79e-05	5.15e-05	5.49e-05	5.94e-05	4.38e-05	5.3e-05	4.95e-05	5.53e-05	5.14e-05	5.73e-05	6.14e-05	5.24e-05	Colorectal cancer	0.42283	0.113136
ko05211	0.00017834	0.00024565	0.000224999	0.000163592	0.000247587	0.000225486	0.000210332	0.000228159	0.000183278	0.000166351	0.000181469	0.000224565	0.000170894	0.00017646	0.000239739	0.000224726	0.000228951	0.000202037	0.000213416	0.000225616	0.000220132	0.000201075	0.000190509	0.00017935	0.000199425	0.00018958	Renal cell carcinoma	0.749971	0.0247654
ko05214	6.25e-12	4.75e-12	2.26e-11	1.19e-11	0	4.99e-12	0	5.79e-11	1.65e-11	1.74e-11	1.29e-11	4.19e-11	0	0	1.4e-10	0	0	0	0	1.97e-11	2.54e-11	0	4.88e-11	0	0	2.02e-11	Glioma	0.915762	0.758868
ko05215	0.000106824	0.000151212	0.000150527	0.000128372	0.000171892	0.000179234	0.000143473	0.000154104	0.00013937	0.000121587	0.000131602	0.000170056	0.000137648	9.07e-05	0.000168266	0.000116661	0.000124995	0.000120159	0.000147276	0.000122841	0.000131664	0.000122757	0.000118458	9.34e-05	0.000113861	0.00011755	Prostate cancer	0.927852	0.265924
ko05219	9.69e-05	0.000121569	0.000119193	7.69e-05	5.53e-05	9.02e-05	0.00012161	0.000111193	5.4e-05	6.16e-05	5.36e-05	5.06e-05	7.72e-05	9.77e-05	6.95e-05	0.000112535	0.000116458	7.18e-05	0.000110869	0.000114906	0.000113572	7.43e-05	7.98e-05	8.05e-05	7.44e-05	7.83e-05	Bladder cancer	0.0174726	0.224837
ko05220	1.35e-06	1.46e-06	1.54e-06	1.53e-06	2.14e-06	1.48e-06	1.51e-06	1.46e-06	1.21e-06	1.28e-06	1.6e-06	1.78e-06	1.51e-06	1.76e-06	1.61e-06	2.08e-06	1.92e-06	1.74e-06	1.52e-06	1.85e-06	1.67e-06	1.6e-06	1.61e-06	1.75e-06	1.85e-06	1.96e-06	Chronic myeloid leukemia	0.659912	0.603497
ko05222	8.49e-05	9.62e-05	9.24e-05	6.69e-05	8.16e-05	7.42e-05	8.75e-05	9.02e-05	7.77e-05	7.55e-05	7.11e-05	7.76e-05	6.93e-05	7.63e-05	7.06e-05	8.54e-05	8.93e-05	8.16e-05	7.83e-05	8.71e-05	8.39e-05	8.36e-05	7.88e-05	7.67e-05	8.04e-05	7.03e-05	Small cell lung cancer	0.116961	0.366953
ko05322	1.76e-05	2.16e-05	2.06e-05	1.3e-05	1.8e-05	1.79e-05	2.13e-05	2.03e-05	1.29e-05	1.36e-05	1.39e-05	1.53e-05	1.36e-05	2.43e-05	1.8e-05	2.94e-05	3.1e-05	2.45e-05	2.28e-05	2.88e-05	2.59e-05	2.32e-05	2.06e-05	2.38e-05	2.6e-05	2.1e-05	Systemic lupus erythematosus	0.115476	0.357491
ko05340	0.000424642	0.000400874	0.000406708	0.000407936	0.000287292	0.0004337	0.000401595	0.000415872	0.000402712	0.000408828	0.000377826	0.000335789	0.000405668	0.000426247	0.000427022	0.000404392	0.000405239	0.000370465	0.000430934	0.000405352	0.000416693	0.00040241	0.000414368	0.000395851	0.000364826	0.00038661	Primary immunodeficiency	0.339638	0.0790253
ko05410	5.33e-05	8.18e-05	4.76e-05	2.2e-05	2.17e-05	6.06e-05	5.48e-05	6.2e-05	3.01e-05	1.69e-05	2.44e-05	2.53e-05	2.17e-05	2.48e-05	2.73e-05	2.88e-05	1.78e-05	1.33e-05	3.42e-05	3.71e-05	4.25e-05	1.9e-05	1.47e-05	1.81e-05	1.42e-05	2.72e-05	Hypertrophic cardiomyopathy (HCM)	0.0464316	0.13612
ko05412	4.05e-06	6.66e-06	3.81e-06	1.82e-06	1.11e-06	3.98e-06	3.99e-06	4.96e-06	2.43e-06	1.32e-06	1.57e-06	1.64e-06	1.92e-06	1.81e-06	2.21e-06	2.17e-06	1.68e-06	9.76e-07	2.87e-06	3e-06	3.53e-06	1.58e-06	1.26e-06	1.45e-06	9.29e-07	2.06e-06	Arrhythmogenic right ventricular cardiomyopathy (ARVC)	0.0282241	0.0826852
ko05414	4.05e-06	6.66e-06	3.81e-06	1.82e-06	1.11e-06	3.98e-06	3.99e-06	4.96e-06	2.43e-06	1.32e-06	1.57e-06	1.64e-06	1.92e-06	1.81e-06	2.21e-06	2.17e-06	1.68e-06	9.76e-07	2.87e-06	3e-06	3.53e-06	1.58e-06	1.26e-06	1.45e-06	9.29e-07	2.06e-06	Dilated cardiomyopathy	0.0282241	0.0826852
ko05416	5.49e-05	5.44e-05	5.27e-05	4.85e-05	6.25e-05	4.01e-05	5.35e-05	5.17e-05	5.29e-05	5.35e-05	5.48e-05	5.7e-05	4.89e-05	5.17e-05	3.79e-05	5.15e-05	5.49e-05	5.94e-05	4.38e-05	5.3e-05	4.95e-05	5.53e-05	5.14e-05	5.73e-05	6.14e-05	5.24e-05	Viral myocarditis	0.42283	0.113136
