# Supplementary material for: Linking Compositional and Functional Predictions to Decipher the Biogeochemical Significance in DFAA Turnover of Abundant Bacterioplankton Lineages in the North Sea
Source: Microorganisms. 2017 Nov 5;5(4):68. doi: 10.3390/microorganisms5040068 (PMC5748577; doi:10.3390/microorganisms5040068)
Supplement: Supplementary file 1 [file microorganisms-05-00068-s001.zip › Table_S7.XLS]

## Sheet: Prediction_Functions_Ps
Table S7. Relative abundances of KEGG orthologs predicted from obtained 16S rRNA data. Correlations between DFAA turnover and pathway abundance were tested by Spearman rank correlation using cor.test() in R. P values were corrected for multiple comparisons according to Benjamini and Hochberg (1995).
KEGG ortholog	Entire bacteriokplankton community													Active bacterioplankton community													Function	P corrected
	1	2	3	6	7	8	10	11	12	13	14	15	16	1	2	3	6	7	8	10	11	12	13	14	15	16		Entire community	Active community
K00001	0.000992917	0.000856805	0.000830577	0.000871422	0.000657606	0.000788596	0.000863168	0.000847293	0.000842855	0.000886453	0.000832046	0.000695911	0.000834189	0.000977285	0.000883957	0.000872928	0.000860947	0.000816649	0.000792427	0.000869875	0.000841688	0.000838311	0.000864087	0.000933767	0.000842144	0.000877389	alcohol dehydrogenase [EC:1.1.1.1]	0.341665	0.648377
K00002	4.08e-05	6.4e-05	7.61e-05	4.33e-05	3.26e-05	7.79e-05	4.76e-05	6.67e-05	5.33e-05	4.36e-05	3.13e-05	4.26e-05	4.93e-05	3.93e-05	6.73e-05	5.92e-05	6.52e-05	4.01e-05	6.4e-05	5.12e-05	6.1e-05	5.03e-05	5.19e-05	3.38e-05	3.12e-05	4.01e-05	alcohol dehydrogenase (NADP+) [EC:1.1.1.2]	0.144726	0.046554
K00003	0.000394339	0.000329627	0.000317205	0.000519679	0.000602746	0.000346608	0.000405904	0.000351698	0.000464581	0.000469592	0.000549699	0.000560285	0.000513203	0.000391121	0.00037007	0.000320303	0.000337334	0.000476502	0.000348648	0.000361006	0.000346715	0.00041611	0.000406283	0.00046534	0.000502917	0.000485877	homoserine dehydrogenase [EC:1.1.1.3]	0.0259887	0.0184401
K00004	1.38e-05	1.65e-05	1.91e-05	1.36e-05	8.29e-06	1.82e-05	2.01e-05	1.74e-05	9.43e-06	9.89e-06	7.93e-06	7.62e-06	1.35e-05	2.03e-05	1.72e-05	2.36e-05	2.12e-05	1.45e-05	2.62e-05	2.27e-05	2.33e-05	1.69e-05	1.95e-05	1.45e-05	1.32e-05	1.65e-05	(R,R)-butanediol dehydrogenase / diacetyl reductase [EC:1.1.1.4 1.1.1.303]	0.0202643	0.044219
K00005	7.14e-06	6.57e-06	7.31e-06	8.24e-05	0.000314115	3.56e-05	3.94e-05	1.86e-05	0.000123231	0.000115462	0.000179658	0.000250078	8.53e-05	6.27e-06	1.57e-05	9.62e-06	2.27e-05	0.000154326	1.31e-05	2.49e-05	1.16e-05	9.65e-05	7.02e-05	9.49e-05	0.000164973	9.66e-05	glycerol dehydrogenase [EC:1.1.1.6]	0.0180541	0.0311764
K00007	4.15e-05	5.36e-05	5.62e-05	2.49e-05	2.46e-05	5.35e-05	4.7e-05	5.2e-05	3.38e-05	3.26e-05	2.23e-05	2.71e-05	2.69e-05	3.28e-05	3.68e-05	4.53e-05	4.26e-05	2.69e-05	4.53e-05	4.07e-05	4.19e-05	3.78e-05	3.89e-05	2.32e-05	2.27e-05	2.16e-05	D-arabinitol 4-dehydrogenase [EC:1.1.1.11]	0.020561	0.0584263
K00008	0.000169822	0.000141224	0.000142179	0.000154422	0.000174335	0.000125992	0.000158011	0.000143612	0.000166112	0.000175601	0.000174014	0.000165697	0.000150195	0.000146285	0.000103589	0.00012397	0.000125241	0.000155598	0.000117902	0.000128249	0.000121151	0.000149261	0.000146263	0.00015888	0.000160762	0.000139608	L-iditol 2-dehydrogenase [EC:1.1.1.14]	0.0490045	0.0301087
K00009	2.45e-06	7.57e-08	2.11e-07	1.39e-06	1.9e-06	1.07e-06	3.12e-07	9.95e-07	9.99e-07	8.11e-06	3.92e-06	2.89e-06	1.11e-06	9.79e-07	6.39e-06	4.26e-07	2.91e-07	1.18e-07	5.76e-07	1.24e-07	1.1e-07	1.42e-07	4.59e-06	4.17e-07	8.84e-07	4.49e-07	mannitol-1-phosphate 5-dehydrogenase [EC:1.1.1.17]	0.0440073	0.550923
K00010	0.000483501	0.000370161	0.000405858	0.000511876	0.000288817	0.000344723	0.000448722	0.000384379	0.000414175	0.000455342	0.000419959	0.000322052	0.000475233	0.000449217	0.00033758	0.000361044	0.000345522	0.000370688	0.000418912	0.000371232	0.000385989	0.000377455	0.000411888	0.000439991	0.000378742	0.000469001	myo-inositol 2-dehydrogenase [EC:1.1.1.18]	0.854449	0.0953849
K00011	2.19e-07	9.93e-08	4.43e-08	1.06e-06	1.45e-07	1.79e-07	1.42e-07	1.24e-07	9.7e-08	2.04e-07	3.47e-07	1.68e-07	9.52e-07	2.83e-07	1.06e-06	1.41e-07	3.65e-08	1.65e-07	1.8e-07	1.25e-07	7.64e-08	2.31e-07	3.91e-07	1.74e-07	1.7e-07	7.74e-07	aldehyde reductase [EC:1.1.1.21]	0.386417	0.608793
K00012	0.000557418	0.000556982	0.000574457	0.000655786	0.0008384	0.00061797	0.00058387	0.00057728	0.000706014	0.000686701	0.000727148	0.000794116	0.000654045	0.000547502	0.000626123	0.000549362	0.000549162	0.000676996	0.000601415	0.000558157	0.000566888	0.00064358	0.000629835	0.000614966	0.000665425	0.000642327	UDPglucose 6-dehydrogenase [EC:1.1.1.22]	0.0183363	0.0422235
K00013	0.000771488	0.000693636	0.000687318	0.000824398	0.000863998	0.000683582	0.000725253	0.000711573	0.000859647	0.000857034	0.00086918	0.000863837	0.000818902	0.000735241	0.000680089	0.000652526	0.000689997	0.000794124	0.000689134	0.000695185	0.000697016	0.000774565	0.000759279	0.000792633	0.000799611	0.000750675	histidinol dehydrogenase [EC:1.1.1.23]	0.0192648	0.00742942
K00014	0.00036607	0.000381878	0.00038984	0.00042895	0.000497117	0.000404744	0.00037917	0.000395149	0.000413389	0.000401504	0.000439037	0.000474938	0.000431886	0.000380111	0.000391529	0.000403854	0.000393785	0.000422664	0.000394242	0.000391547	0.000392565	0.000409815	0.000401283	0.00039804	0.000424494	0.000432954	shikimate dehydrogenase [EC:1.1.1.25]	0.0264229	0.0756735
K00015	0.000710989	0.000516807	0.000516103	0.000611891	0.000437978	0.000437292	0.000569445	0.000525592	0.000616381	0.000671063	0.000610502	0.000473651	0.000578909	0.000677306	0.000474041	0.000521696	0.000542567	0.000567193	0.0004731	0.000538906	0.000514697	0.000565239	0.000575914	0.000665741	0.000591274	0.000549815	glyoxylate reductase [EC:1.1.1.26]	0.85816	0.102025
K00016	3.41e-05	4.35e-05	5e-05	3.68e-05	4.19e-05	6e-05	4.71e-05	5.05e-05	3.78e-05	4.21e-05	3.24e-05	4.33e-05	3.76e-05	4.51e-05	5.52e-05	5.38e-05	6.05e-05	4.35e-05	6.8e-05	5.69e-05	6.16e-05	4.63e-05	5.37e-05	3.82e-05	4.43e-05	4.33e-05	L-lactate dehydrogenase [EC:1.1.1.27]	0.228274	0.0335773
K00018	0.000111196	7.63e-05	8.41e-05	0.000113768	9.37e-05	0.000104009	8.93e-05	9.46e-05	0.000121446	0.000126938	0.000115398	0.000101414	0.000108908	0.000102955	0.000122639	7.26e-05	7.97e-05	9.21e-05	8.33e-05	7.74e-05	7.77e-05	9.51e-05	0.000101822	0.000101599	9.46e-05	9.95e-05	glycerate dehydrogenase [EC:1.1.1.29]	0.120845	0.439544
K00019	0.000720243	0.000695539	0.000640439	0.000580719	0.000470551	0.000601746	0.00066519	0.000653493	0.000572316	0.00059975	0.000572702	0.000491372	0.000562309	0.000701849	0.000590017	0.000667153	0.000665489	0.000579945	0.000598584	0.000675284	0.000646677	0.000598151	0.000605876	0.000664678	0.000602421	0.000594739	3-hydroxybutyrate dehydrogenase [EC:1.1.1.30]	0.0245663	0.247973
K00020	0.000721401	0.000579529	0.000588122	0.000654535	0.000624536	0.000521059	0.000642161	0.000588404	0.000648501	0.000698867	0.000681887	0.000600754	0.000626379	0.000702279	0.000473434	0.000598272	0.000606197	0.000662074	0.00052656	0.00059842	0.00056727	0.000628986	0.000630313	0.000719363	0.000694063	0.000620926	3-hydroxyisobutyrate dehydrogenase [EC:1.1.1.31]	0.370923	0.0504773
K00021	1.81e-06	6.48e-07	3.84e-07	7.99e-06	4.96e-07	4.09e-07	1.09e-06	1.47e-06	9.33e-07	9.22e-07	1.9e-06	1.47e-06	7.37e-06	3.27e-06	1.15e-05	5.17e-07	2.6e-08	7.29e-07	9.99e-07	1.55e-06	5.48e-07	5.08e-07	2.04e-06	7.93e-07	6.76e-07	9.66e-06	hydroxymethylglutaryl-CoA reductase (NADPH) [EC:1.1.1.34]	0.599655	0.935641
K00023	0.000431109	0.000355237	0.000325865	0.000368867	0.000242272	0.000375252	0.000377274	0.000350272	0.000362359	0.000378973	0.000361654	0.00028056	0.000348943	0.000407665	0.000381996	0.000333173	0.000321604	0.000325809	0.000336531	0.000347212	0.000342146	0.000337226	0.000354337	0.00038875	0.000336309	0.000364914	acetoacetyl-CoA reductase [EC:1.1.1.36]	0.633068	0.711202
K00024	0.000445473	0.000436326	0.000435274	0.000404082	0.000270006	0.000425479	0.000409592	0.000432117	0.000407631	0.000402594	0.00035129	0.000314515	0.000397713	0.000429782	0.000464356	0.000411672	0.00040914	0.000356203	0.000440936	0.000411924	0.000432798	0.000396333	0.000409246	0.000383132	0.00034178	0.000387093	malate dehydrogenase [EC:1.1.1.37]	0.0183775	0.0361475
K00027	0.000524079	0.000533288	0.000509014	0.000483433	0.000357672	0.00046501	0.000479518	0.000518401	0.000452455	0.00044847	0.000432353	0.000395868	0.00048668	0.000497585	0.000513361	0.0004855	0.000489587	0.000428792	0.000459196	0.000484961	0.000485411	0.000453721	0.000451178	0.000462974	0.000432137	0.000463772	malate dehydrogenase (oxaloacetate-decarboxylating) [EC:1.1.1.38]	0.0302368	0.0205849
K00029	0.00132621	0.00136224	0.00134414	0.00113285	0.000779365	0.00120901	0.0012118	0.00129719	0.00110429	0.00110089	0.000986156	0.000885845	0.0011361	0.0012907	0.00130999	0.00131479	0.00129132	0.00105085	0.00122293	0.00126471	0.00126909	0.00115024	0.00116724	0.00114373	0.00103082	0.00110657	malate dehydrogenase (oxaloacetate-decarboxylating)(NADP+) [EC:1.1.1.40]	0.0181199	0.00576849
K00030	8.34e-05	2.92e-05	4.19e-05	0.000132906	0.0002207	7.85e-05	6.75e-05	5e-05	0.000151934	0.000154709	0.000186775	0.000198642	0.00012793	8.37e-05	9.02e-05	5.09e-05	5.17e-05	0.000149613	5.02e-05	5.44e-05	4.87e-05	0.000120077	0.0001112	0.000131338	0.000156782	0.000129437	isocitrate dehydrogenase (NAD+) [EC:1.1.1.41]	0.0183363	0.0400482
K00031	0.000964116	0.0011273	0.00111553	0.000963586	0.00102501	0.00109691	0.00105494	0.0011025	0.000986534	0.000935986	0.000932833	0.00102112	0.000989813	0.000920773	0.00105413	0.00102032	0.00102903	0.0009468	0.00108083	0.00102502	0.00105099	0.000985377	0.000972037	0.000887275	0.000916738	0.000932048	isocitrate dehydrogenase [EC:1.1.1.42]	0.101629	0.0565886
K00032	1.61e-05	2.27e-05	2.15e-05	9.01e-06	1e-05	2.42e-05	2.1e-05	2.06e-05	9.06e-06	1e-05	9.21e-06	8.77e-06	9.33e-06	9.1e-06	1.29e-05	1.3e-05	1.15e-05	6.95e-06	1.07e-05	1.04e-05	9.17e-06	7e-06	7.65e-06	8.07e-06	7.4e-06	6.72e-06	phosphogluconate 2-dehydrogenase [EC:1.1.1.43]	0.14042	0.00563271
K00033	0.000105323	0.000132789	0.000161217	0.000257202	0.000515233	0.000190106	0.000201903	0.000151193	0.000246225	0.000243793	0.000328611	0.000424236	0.000260385	0.000131023	0.000162127	0.000170024	0.000165746	0.00030913	0.000210592	0.000180185	0.000175901	0.000245894	0.000235354	0.000227299	0.000312634	0.000285536	6-phosphogluconate dehydrogenase [EC:1.1.1.44]	0.0293651	0.0172019
K00034	0.000272894	0.000254135	0.000248084	0.000248542	0.000205543	0.000236886	0.000240045	0.000246611	0.000247407	0.000248286	0.000240202	0.000214384	0.00024226	0.000227082	0.000217033	0.000215717	0.000187357	0.000215208	0.000204245	0.000201467	0.000210057	0.000221229	0.000226483	0.00022708	0.00021111	0.000235157	glucose 1-dehydrogenase [EC:1.1.1.47]	0.12857	0.200176
K00035	3.05e-05	3.24e-05	3.63e-05	3.78e-05	5.1e-05	3.77e-05	3.4e-05	3.19e-05	2.78e-05	2.99e-05	3.86e-05	4.3e-05	3.63e-05	3.04e-05	3.1e-05	3.9e-05	3.17e-05	3.55e-05	2.66e-05	3.11e-05	2.69e-05	3.16e-05	3.35e-05	3.44e-05	3.85e-05	4.58e-05	D-galactose 1-dehydrogenase [EC:1.1.1.48]	0.640814	0.329121
K00036	0.000515264	0.000355803	0.00040713	0.000622509	0.000787518	0.00045104	0.000486876	0.000414275	0.000643328	0.000677175	0.000733171	0.00073132	0.000602309	0.000545281	0.000431665	0.000463765	0.000461983	0.000672497	0.000464681	0.000470463	0.00045951	0.000603454	0.000598853	0.000647864	0.000690754	0.000623983	glucose-6-phosphate 1-dehydrogenase [EC:1.1.1.49]	0.0180541	0.0135912
K00038	0.000198696	0.000188359	0.000186859	0.000185177	0.000115534	0.000187549	0.000193473	0.000183838	0.000159548	0.000163042	0.000156248	0.000127006	0.000177256	0.000212376	0.000186894	0.000209795	0.000189784	0.000168826	0.000209183	0.000203605	0.000208307	0.000178412	0.00018752	0.000191062	0.000167307	0.000195051	3alpha(or 20beta)-hydroxysteroid dehydrogenase [EC:1.1.1.53]	0.0181199	0.270598
K00039	3.73e-05	4.28e-05	4.3e-05	2.94e-05	2.12e-05	2.69e-05	3.58e-05	3.72e-05	1.87e-05	2.12e-05	2.07e-05	1.86e-05	2.81e-05	5.21e-05	3.58e-05	6.2e-05	5.91e-05	3.91e-05	4.5e-05	5.72e-05	5.24e-05	4.03e-05	4.1e-05	4.46e-05	4.14e-05	4.5e-05	ribitol 2-dehydrogenase [EC:1.1.1.56]	0.0183775	0.1787
K00040	0.000407147	0.000266847	0.000280131	0.00034886	0.000238258	0.000239301	0.00029492	0.000287998	0.000376896	0.000407444	0.000357961	0.000277597	0.000327062	0.000397659	0.000251746	0.000298132	0.000311753	0.000335418	0.000273413	0.000306771	0.000302086	0.000348143	0.000352625	0.000390353	0.000345603	0.000319718	fructuronate reductase [EC:1.1.1.57]	0.698789	0.0624266
K00041	6.7e-05	9.78e-05	0.000135732	9.26e-05	4.05e-05	0.000110238	0.000105455	9.51e-05	6.37e-05	5.59e-05	3.85e-05	4.4e-05	9.61e-05	9.65e-05	0.000120645	0.000147345	0.000116982	8.33e-05	0.000168221	0.000122134	0.000138125	0.000100487	0.000108578	6.91e-05	6.07e-05	0.00010491	tagaturonate reductase [EC:1.1.1.58]	0.020561	0.0515087
K00042	0.000249169	0.000298005	0.000288083	0.000182355	0.000226254	0.000235183	0.000283683	0.000276491	0.000165425	0.000176909	0.000176163	0.000185632	0.000188465	0.000222203	0.000169018	0.000261256	0.000257938	0.000201529	0.000198356	0.000244399	0.00022138	0.000193211	0.00018859	0.000205246	0.000212624	0.000184804	2-hydroxy-3-oxopropionate reductase [EC:1.1.1.60]	0.0293651	0.223291
K00043	6.47e-06	5.11e-06	7.95e-06	6.24e-06	3.35e-06	1.63e-05	7.35e-06	6.54e-06	2.74e-06	4e-06	4.66e-06	3.28e-06	5.38e-06	1.26e-05	1.65e-05	1.57e-05	9.67e-06	6.43e-06	1.09e-05	9.43e-06	8.81e-06	7.37e-06	1.06e-05	8.36e-06	6.85e-06	1.13e-05	4-hydroxybutyrate dehydrogenase [EC:1.1.1.61]	0.0730417	0.0528356
K00044	1.09e-05	1.77e-05	1.03e-05	5.68e-06	5.06e-06	1.28e-05	1.16e-05	1.39e-05	6.35e-06	3.95e-06	5.81e-06	5.95e-06	5.46e-06	4.82e-06	7e-06	6.31e-06	4.26e-06	3.42e-06	8.28e-06	8.47e-06	9.79e-06	4.38e-06	4.08e-06	5.04e-06	3.8e-06	8.04e-06	estradiol 17beta-dehydrogenase [EC:1.1.1.62]	0.0574676	0.3704
K00045	0.00040076	0.000350231	0.000362204	0.000310127	0.000238366	0.000309962	0.000333749	0.000360186	0.000374966	0.000381504	0.000311853	0.000281585	0.000301186	0.000376483	0.000276838	0.000342994	0.000374511	0.000322628	0.000341481	0.000356912	0.000358983	0.000366014	0.000362483	0.000349462	0.000320332	0.000282179	mannitol 2-dehydrogenase [EC:1.1.1.67]	0.427704	0.835035
K00046	0.000738364	0.000657989	0.000671089	0.000688996	0.000442773	0.000626628	0.000697532	0.000654099	0.000629609	0.000655416	0.000604159	0.000493792	0.000662049	0.000703338	0.00057176	0.000635297	0.000612292	0.000584451	0.000666333	0.000639293	0.000657289	0.000605415	0.00063399	0.000667478	0.000586008	0.000649941	gluconate 5-dehydrogenase [EC:1.1.1.69]	0.0427203	0.782685
K00048	3.81e-06	4.82e-06	5.3e-06	3.39e-06	4.12e-06	1.01e-05	5.9e-06	6.07e-06	2.62e-06	4.45e-06	3.84e-06	3.38e-06	3.34e-06	3.87e-06	1.1e-05	4.62e-06	3.11e-06	2.78e-06	4.12e-06	2.84e-06	2.61e-06	2.69e-06	3.39e-06	3.12e-06	3.11e-06	3.95e-06	lactaldehyde reductase [EC:1.1.1.77]	0.285784	0.254825
K00050	0.000429397	0.00029647	0.000298702	0.000366478	0.00025034	0.000249841	0.000323102	0.000303163	0.000373862	0.000408929	0.000372056	0.00028034	0.000346729	0.000407647	0.00026039	0.000305784	0.000313368	0.00033894	0.000265966	0.000309837	0.00029632	0.000339764	0.000347627	0.000408258	0.000356501	0.000338016	hydroxypyruvate reductase [EC:1.1.1.81]	0.755187	0.0640097
K00052	0.000815391	0.000618315	0.000643103	0.000874279	0.00084944	0.000658279	0.000691303	0.00067246	0.000915701	0.000924652	0.000930875	0.000871155	0.000854296	0.000748502	0.000616215	0.000596495	0.000603557	0.000802495	0.000631235	0.000625168	0.000640192	0.000781405	0.000771917	0.00082207	0.000810134	0.000783299	3-isopropylmalate dehydrogenase [EC:1.1.1.85]	0.0312238	0.00523274
K00053	0.000432914	0.000398378	0.000462901	0.000544487	0.00063466	0.000453008	0.000430415	0.000441947	0.000553634	0.000544925	0.000572504	0.000616895	0.000549561	0.000445722	0.000407853	0.000451095	0.000456466	0.000535412	0.000459568	0.000437298	0.000449567	0.000518592	0.000503193	0.000487978	0.000529693	0.000503642	ketol-acid reductoisomerase [EC:1.1.1.86]	0.0183363	0.0184401
K00054	0.000219319	0.000364488	0.000334356	0.000147076	0.00010556	0.000320592	0.000248738	0.00031983	0.000195949	0.00015268	0.000108593	0.000144492	0.000167215	0.00018952	0.000309364	0.000285512	0.000274931	0.000155267	0.000311356	0.000271983	0.000298869	0.000213739	0.000208329	0.000134409	0.000120142	0.000154695	hydroxymethylglutaryl-CoA reductase [EC:1.1.1.88]	0.0210884	0.0311764
K00055	1.63e-05	2.04e-05	2.97e-05	2.64e-05	2.13e-05	3.1e-05	1.86e-05	2.18e-05	1.82e-05	1.97e-05	2.13e-05	2.16e-05	2.59e-05	1.91e-05	3.62e-05	3.1e-05	2.28e-05	1.98e-05	2.31e-05	1.92e-05	2.11e-05	2.09e-05	2.53e-05	1.8e-05	1.69e-05	2.98e-05	aryl-alcohol dehydrogenase [EC:1.1.1.90]	0.777075	0.244515
K00057	0.000412531	0.000462808	0.000459394	0.000411211	0.000286627	0.000448474	0.000421509	0.000459016	0.000370264	0.000358051	0.000332372	0.000327247	0.000420427	0.000403621	0.000485394	0.000428008	0.000429764	0.000342185	0.000456764	0.000426857	0.000445994	0.000380013	0.000392161	0.000348242	0.000328338	0.000382222	glycerol-3-phosphate dehydrogenase (NAD(P)+) [EC:1.1.1.94]	0.0214166	0.0184401
K00058	0.00165215	0.00141511	0.00144963	0.00167444	0.0014542	0.0014172	0.00149652	0.00146151	0.00166988	0.00169604	0.00165024	0.00151485	0.00164116	0.00163674	0.00146265	0.0014715	0.00144973	0.00158052	0.00150289	0.00147753	0.00150119	0.0015923	0.0016069	0.00165069	0.00157132	0.00159646	D-3-phosphoglycerate dehydrogenase [EC:1.1.1.95]	0.370923	0.0163716
K00059	0.00496621	0.00503653	0.00491874	0.00445848	0.0034973	0.00487009	0.00480329	0.00491448	0.00435888	0.00436229	0.00409329	0.0037631	0.00437635	0.00473136	0.0046285	0.00474462	0.00461037	0.00410127	0.00475612	0.00470529	0.00478794	0.0043835	0.00451059	0.00442235	0.00407474	0.00444134	3-oxoacyl-[acyl-carrier protein] reductase [EC:1.1.1.100]	0.0180541	0.0580741
K00060	0.000131233	0.000159478	0.000157303	8.79e-05	9.17e-05	0.000135088	0.000151283	0.00014808	8.56e-05	9.06e-05	8.08e-05	8.3e-05	9.18e-05	0.000140891	0.000129099	0.00017084	0.000170555	0.0001152	0.000139374	0.000160861	0.000148995	0.000124208	0.000123876	0.000117698	0.000114731	0.000102641	threonine 3-dehydrogenase [EC:1.1.1.103]	0.0309399	0.0139469
K00064	0.000135261	0.00017222	0.000180939	0.000127306	7.7e-05	0.000153427	0.000193765	0.000163283	7.71e-05	8.31e-05	7.4e-05	7.05e-05	0.000125584	0.000118858	8.73e-05	0.000137074	0.000132953	8.34e-05	0.000170026	0.00014101	0.000148497	8.72e-05	0.000100459	9.06e-05	8.39e-05	0.000112329	D-threo-aldose 1-dehydrogenase [EC:1.1.1.122]	0.0180541	0.166906
K00065	0.000360208	0.00034622	0.000363376	0.0003411	0.00024681	0.000319816	0.000366431	0.000344893	0.000283666	0.000302441	0.00028605	0.000248472	0.000330777	0.000403634	0.000318237	0.000417058	0.000398472	0.00033248	0.000391988	0.000401745	0.000401403	0.000342788	0.000359961	0.000365175	0.000334167	0.000363022	2-deoxy-D-gluconate 3-dehydrogenase [EC:1.1.1.125]	0.0183363	0.230422
K00066	1.5e-05	1.79e-05	1.89e-05	1.15e-05	1.18e-05	2.25e-05	1.92e-05	2.17e-05	8.97e-06	9.42e-06	8.69e-06	8.11e-06	1.25e-05	1.55e-05	1.86e-05	2.04e-05	1.75e-05	1.06e-05	1.56e-05	1.7e-05	1.52e-05	1.06e-05	1.14e-05	1.09e-05	1.05e-05	1.15e-05	GDP-mannose 6-dehydrogenase [EC:1.1.1.132]	0.110913	0.0062709
K00067	0.000331685	0.000480891	0.000479216	0.000312325	0.000364387	0.000485943	0.000409529	0.000466565	0.000353254	0.000312874	0.00029045	0.000366212	0.000339124	0.000334615	0.000445373	0.000447673	0.000456248	0.000349536	0.000477166	0.000437218	0.000461775	0.000387525	0.000384626	0.000299391	0.000318329	0.000329425	dTDP-4-dehydrorhamnose reductase [EC:1.1.1.133]	0.147612	0.0528356
K00068	6.76e-05	0.000101074	9.09e-05	4.65e-05	3.16e-05	8.29e-05	6.89e-05	8.56e-05	5.1e-05	3.98e-05	3.39e-05	3.92e-05	4.8e-05	5.52e-05	6.97e-05	8.04e-05	6.65e-05	4.27e-05	7.58e-05	7.16e-05	7.89e-05	5.63e-05	5.58e-05	4.26e-05	3.63e-05	5.66e-05	sorbitol-6-phosphate 2-dehydrogenase [EC:1.1.1.140]	0.0183363	0.046554
K00073	1.32e-05	1.55e-05	1.56e-05	7.48e-06	7.42e-06	1.6e-05	1.54e-05	1.49e-05	7.07e-06	8.53e-06	7.08e-06	6.56e-06	7.85e-06	2.08e-05	1.58e-05	2.49e-05	2.46e-05	1.5e-05	1.9e-05	2.29e-05	2.11e-05	1.55e-05	1.53e-05	1.67e-05	1.56e-05	1.28e-05	ureidoglycolate dehydrogenase [EC:1.1.1.154]	0.0390726	0.023006
K00074	0.000714569	0.000890616	0.000830981	0.00052215	0.000385628	0.000772007	0.00072674	0.000813162	0.000546186	0.000519592	0.000441277	0.00044316	0.000532772	0.000683695	0.000745936	0.000792471	0.000793084	0.000521049	0.000748811	0.000772856	0.000771476	0.000606865	0.000608502	0.000558944	0.000508694	0.000560384	3-hydroxybutyryl-CoA dehydrogenase [EC:1.1.1.157]	0.0183363	0.0135711
K00075	0.000403327	0.000412885	0.000408578	0.000459723	0.000513985	0.000423281	0.000415452	0.000414457	0.000457521	0.000443883	0.000472879	0.000499351	0.000463572	0.000395479	0.000452103	0.000394723	0.000390728	0.000440507	0.000419635	0.000400892	0.000406277	0.000428702	0.000420747	0.000414593	0.000434191	0.000438543	UDP-N-acetylmuramate dehydrogenase [EC:1.1.1.158]	0.020561	0.200176
K00076	0.000230759	0.000187021	0.000189651	0.000204923	0.000145977	0.000146073	0.000181424	0.000184301	0.000197199	0.000210807	0.000191822	0.000158675	0.000192852	0.000225203	0.000156946	0.000195467	0.000199698	0.00019207	0.000167371	0.000192885	0.000185583	0.000195943	0.000198879	0.000222277	0.00020081	0.000201964	7-alpha-hydroxysteroid dehydrogenase [EC:1.1.1.159]	0.949653	0.311444
K00077	0.000538282	0.00020388	0.000252906	0.000556696	0.000345115	0.00030901	0.000330046	0.000280733	0.000597941	0.000651582	0.0005976	0.000427804	0.000511295	0.00050626	0.000342499	0.000252235	0.000251289	0.000460777	0.000295044	0.000267146	0.000284826	0.00045122	0.000476108	0.000549508	0.000471866	0.000458258	2-dehydropantoate 2-reductase [EC:1.1.1.169]	0.0854084	0.035319
K00082	2.48e-06	1.75e-06	2.24e-06	5.11e-05	0.000195451	1.85e-05	2.2e-05	9.01e-06	7.6e-05	7.18e-05	0.000113402	0.000156599	5.25e-05	1.46e-06	4.94e-06	3.24e-06	1.12e-05	8.59e-05	5.6e-06	1.25e-05	5e-06	5.33e-05	3.86e-05	5.23e-05	9.21e-05	5.36e-05	5-amino-6-(5-phosphoribosylamino)uracil reductase [EC:1.1.1.193]	0.0171139	0.0190735
K00086	1.4e-05	1.41e-05	1.56e-05	1.15e-05	1.75e-05	2.15e-05	1.78e-05	1.75e-05	1.05e-05	1.15e-05	1.28e-05	1.34e-05	1.23e-05	1.24e-05	1.91e-05	1.45e-05	1.15e-05	1.08e-05	1.08e-05	1.07e-05	1e-05	9.74e-06	9.98e-06	9.88e-06	1.13e-05	1.09e-05	1,3-propanediol dehydrogenase [EC:1.1.1.202]	0.473254	0.0327285
K00087	8.13e-05	0.000104833	9.74e-05	4.86e-05	4.62e-05	6.39e-05	9e-05	8.91e-05	4.59e-05	4.99e-05	4.31e-05	4.2e-05	5.13e-05	6.74e-05	4.97e-05	8.22e-05	8.55e-05	5.28e-05	6.42e-05	8.02e-05	7.31e-05	5.51e-05	5.26e-05	5.91e-05	5.48e-05	4.65e-05	xanthine dehydrogenase molybdenum-binding subunit [EC:1.17.1.4]	0.0214166	0.133549
K00088	0.000727724	0.000746414	0.00075436	0.000820335	0.000804979	0.000768864	0.000752623	0.000769382	0.000786331	0.000772261	0.000793915	0.000817535	0.000827816	0.000699014	0.000729401	0.000692078	0.000712262	0.000737124	0.0007624	0.000716498	0.000740849	0.000738378	0.000736322	0.000714107	0.000733959	0.000755652	IMP dehydrogenase [EC:1.1.1.205]	0.0730417	0.17125
K00090	0.000437842	0.000239808	0.000253983	0.00040157	0.00028094	0.000262906	0.00030419	0.000276901	0.000428131	0.000468393	0.000428382	0.000318539	0.000371747	0.000407936	0.000280136	0.000256804	0.000263803	0.000355483	0.000243908	0.000266308	0.000260181	0.000349595	0.000362753	0.000424491	0.000371439	0.000342942	gluconate 2-dehydrogenase [EC:1.1.1.215]	0.153573	0.0812138
K00091	0.000127829	0.000154202	0.000116733	0.000129546	0.000161577	0.000154475	0.000159313	0.000139019	0.000135609	0.000127801	0.000140313	0.000155812	0.000128712	9.77e-05	0.000211263	8.72e-05	9.58e-05	0.000110354	0.000140298	0.000120755	0.000117226	0.00011099	0.000113653	0.000103939	0.000111418	0.000128289	dihydroflavonol-4-reductase [EC:1.1.1.219]	0.710551	0.978214
K00094	2.84e-07	9.76e-08	4.87e-07	2.64e-07	4.04e-07	2.41e-06	7.7e-07	9.1e-07	1.74e-07	8.97e-07	4.39e-07	2.32e-07	2.28e-07	6.49e-07	2.1e-06	9.91e-07	2.88e-07	1.84e-07	7.64e-07	2.33e-07	2.77e-07	1.79e-07	5.96e-07	3.06e-07	1.93e-07	5.66e-07	galactitol-1-phosphate 5-dehydrogenase [EC:1.1.1.251]	0.99084	0.142406
K00096	5.41e-05	6.77e-05	6.22e-05	3.02e-05	3.69e-05	4.03e-05	6.1e-05	5.94e-05	3.24e-05	3.42e-05	3.02e-05	3.17e-05	3.28e-05	2.56e-05	2.59e-05	3.03e-05	3.26e-05	2.22e-05	2.33e-05	3.02e-05	2.75e-05	2.2e-05	2.01e-05	2.3e-05	2.36e-05	1.71e-05	glycerol-1-phosphate dehydrogenase [NAD(P)] [EC:1.1.1.261]	0.0636512	0.0110106
K00097	0.000417453	0.000428327	0.00042987	0.000475292	0.000546729	0.000449654	0.000433525	0.000434016	0.000478819	0.000463322	0.000495382	0.000530178	0.000483855	0.00041596	0.000441836	0.000421214	0.000422269	0.000467724	0.000436046	0.000426452	0.000426238	0.000453396	0.000442646	0.000440919	0.000465883	0.000455601	4-hydroxythreonine-4-phosphate dehydrogenase [EC:1.1.1.262]	0.0181199	0.0422235
K00098	0.000154211	0.000158522	0.000149876	0.000103676	9.06e-05	0.000102675	0.000148777	0.00014342	0.000105495	0.000113962	0.000101295	8.85e-05	0.000103865	0.000139578	8.34e-05	0.000139531	0.000147556	0.000112035	0.000111495	0.000140216	0.000130155	0.000114182	0.000110165	0.000128286	0.000117904	9.88e-05	L-idonate 5-dehydrogenase [EC:1.1.1.264]	0.039974	0.329121
K00099	0.000319146	0.000224147	0.000228994	0.00046086	0.000627874	0.000281402	0.000336078	0.000270004	0.000445345	0.000458711	0.000544075	0.000570946	0.000459923	0.000330954	0.000329581	0.000243202	0.000284823	0.000457496	0.000271336	0.000291427	0.000268746	0.000381442	0.000364484	0.000426999	0.000484716	0.000410474	1-deoxy-D-xylulose-5-phosphate reductoisomerase [EC:1.1.1.267]	0.0270661	0.0205849
K00100	0.00174431	0.00183114	0.00185126	0.00150247	0.00111505	0.00171226	0.00168434	0.00177594	0.00144369	0.00144476	0.00130993	0.00120109	0.00149065	0.00181419	0.00160368	0.00196073	0.0018685	0.00150037	0.0018148	0.00184846	0.00187446	0.00163888	0.00167151	0.0016179	0.00147356	0.0016113	[EC:1.1.1.-]	0.0180541	0.122331
K00101	0.000972142	0.000580671	0.000605735	0.000886567	0.000667953	0.00054587	0.000687032	0.000636608	0.000957752	0.00103515	0.000950659	0.000739771	0.000830619	0.00089134	0.000563379	0.000586399	0.000611006	0.00080283	0.000551219	0.000615228	0.000604015	0.000792169	0.000807173	0.000935533	0.000830435	0.000757481	L-lactate dehydrogenase (cytochrome) [EC:1.1.2.3]	0.239949	0.0515087
K00102	0.00102508	0.000995735	0.00105451	0.000883539	0.0006269	0.00096495	0.000910598	0.00100022	0.000946859	0.000950076	0.000807309	0.00073039	0.000884424	0.00101578	0.000928046	0.00102889	0.00103774	0.000860211	0.000988345	0.000979618	0.00100978	0.000957782	0.000980409	0.000927371	0.000826738	0.000858402	D-lactate dehydrogenase (cytochrome) [EC:1.1.2.4]	0.0623084	0.0565886
K00103	2.8e-05	3.77e-05	3.93e-05	3.23e-05	2.43e-05	3.02e-05	2.94e-05	3.47e-05	1.88e-05	2.03e-05	2.29e-05	2.27e-05	3.04e-05	2.86e-05	3.23e-05	3.92e-05	3.5e-05	2.58e-05	3.05e-05	3.29e-05	2.98e-05	2.7e-05	2.83e-05	2.89e-05	2.79e-05	4.17e-05	L-gulonolactone oxidase [EC:1.1.3.8]	0.0341087	0.126145
K00104	0.0011462	0.000932624	0.000909564	0.00111319	0.000889018	0.000906786	0.000993743	0.000949442	0.00107266	0.00111592	0.0010921	0.000939621	0.00107863	0.00109136	0.000870501	0.000896471	0.000886025	0.000999897	0.000886534	0.000920572	0.000914102	0.00099404	0.00100805	0.00110122	0.00103034	0.00103676	glycolate oxidase [EC:1.1.3.15]	0.799261	0.0246679
K00105	1.72e-06	2.79e-06	4.04e-06	2.22e-06	1.16e-06	2.56e-06	1.93e-06	2.71e-06	2e-06	1.78e-06	1.26e-06	1.39e-06	2.49e-06	2.21e-06	5.07e-06	3.89e-06	3.63e-06	2.22e-06	3.16e-06	2.55e-06	3.15e-06	2.78e-06	2.98e-06	1.85e-06	1.5e-06	2.31e-06	alpha-glycerophosphate oxidase [EC:1.1.3.21]	0.039974	0.0335773
K00108	0.00133062	0.00102422	0.00103537	0.00111446	0.00079563	0.000892759	0.00105358	0.00104251	0.00114978	0.00123197	0.00110332	0.000885711	0.00105026	0.00123951	0.000844707	0.00100286	0.00104284	0.00101819	0.000896869	0.00101135	0.000979924	0.00105454	0.00107203	0.00120444	0.00107067	0.00101886	choline dehydrogenase [EC:1.1.99.1]	0.976878	0.166906
K00109	3.58e-07	5.21e-07	7.23e-07	1.08e-06	7.2e-08	7.55e-07	6.26e-07	7.02e-07	7.42e-08	4.11e-07	5.94e-07	3.35e-07	1.08e-06	5.83e-08	2.64e-07	1.58e-07	8.11e-08	1.51e-08	3.79e-08	3.95e-08	5.83e-08	8.74e-08	7.17e-08	7.44e-08	6.71e-08	1.15e-06	2-hydroxyglutarate dehydrogenase [EC:1.1.99.2]	0.365065	0.692749
K00111	0.00061899	0.000533541	0.000562487	0.000577408	0.000506736	0.000507889	0.000549998	0.000541134	0.000556462	0.000595547	0.000572581	0.000510461	0.000562315	0.00059275	0.00054765	0.00057018	0.000534189	0.000570427	0.000495734	0.000527498	0.000512451	0.000565836	0.000581825	0.000600696	0.000571395	0.000591208	glycerol-3-phosphate dehydrogenase [EC:1.1.5.3]	0.90205	0.131377
K00112	1.49e-05	2.27e-05	1.54e-05	1.33e-05	1.39e-05	1.78e-05	1.64e-05	1.98e-05	1.24e-05	9.77e-06	1.08e-05	1.24e-05	1.3e-05	1.11e-05	1.34e-05	1.3e-05	1.15e-05	9.91e-06	1.37e-05	1.48e-05	1.55e-05	1.1e-05	1e-05	1.05e-05	9.9e-06	1.44e-05	glycerol-3-phosphate dehydrogenase subunit B [EC:1.1.5.3]	0.038354	0.203255
K00113	3.17e-06	4.68e-06	6.8e-06	1.13e-05	9.66e-06	5.94e-06	4.04e-06	6.25e-06	5.35e-06	5.57e-06	5.15e-06	5.74e-06	1.07e-05	4.73e-06	7.04e-06	6.37e-06	4.07e-06	4.31e-06	4.63e-06	3.75e-06	3.7e-06	4.81e-06	4.9e-06	3.65e-06	3.78e-06	8.26e-06	glycerol-3-phosphate dehydrogenase subunit C [EC:1.1.5.3]	0.826496	0.583499
K00114	0.000196857	0.000235641	0.000224762	0.000153118	0.00011167	0.000182746	0.000218662	0.00021434	0.00010719	0.000121012	0.000109923	9.88e-05	0.000163306	0.000215765	0.000161233	0.000250301	0.000250004	0.000157702	0.000193651	0.00023788	0.000218497	0.000164172	0.000170843	0.000178927	0.000163872	0.000163224	alcohol dehydrogenase (cytochrome c) [EC:1.1.2.8]	0.0195644	0.116339
K00115	1.23e-07	4.93e-08	1.71e-07	6.01e-07	1.02e-07	1.01e-06	2.81e-07	1.75e-07	1.01e-07	1.44e-07	3.6e-07	1.52e-07	6.54e-07	5.17e-07	1.11e-06	6.15e-07	1.14e-07	1.76e-07	5.09e-07	1.97e-07	1.68e-07	2.84e-07	4.38e-07	3.21e-07	1.99e-07	5.2e-07	glucose dehydrogenase (acceptor) [EC:1.1.99.10]	0.935326	0.556625
K00116	0.000143901	0.000206368	0.000268013	0.00026605	0.000498395	0.000316232	0.000232791	0.000239151	0.000312789	0.000283681	0.000321092	0.000442285	0.000282738	0.000176203	0.000222798	0.00026294	0.00024744	0.000314847	0.000308564	0.000232338	0.000261872	0.000297652	0.000282021	0.00021133	0.000290118	0.000263784	malate dehydrogenase (quinone) [EC:1.1.5.4]	0.0264229	0.294885
K00117	0.000225074	0.000258168	0.000262013	0.00018313	0.000141747	0.00027746	0.000247655	0.000265956	0.000171854	0.000177717	0.000160095	0.000146123	0.000186792	0.000313664	0.000284175	0.000365843	0.000376274	0.000251891	0.000314954	0.000354998	0.000336901	0.000267853	0.000268613	0.000278361	0.000253177	0.000245352	quinoprotein glucose dehydrogenase [EC:1.1.5.2]	0.0390726	0.0184401
K00118	0.000123742	9.92e-05	0.000118029	0.000149844	7.38e-05	0.000110166	0.000114804	0.000104173	0.000118702	0.000125385	0.000117155	8.96e-05	0.000139666	0.000110313	0.000118127	9.67e-05	8.64e-05	9.82e-05	0.000114329	9.06e-05	9.7e-05	0.000102995	0.00011343	0.000117098	9.53e-05	0.000141899	glucose-fructose oxidoreductase [EC:1.1.99.28]	0.949653	0.303514
K00119	0.000745435	0.000759244	0.000754447	0.000578779	0.000456458	0.000593257	0.000696788	0.000713118	0.000538034	0.000572987	0.000516298	0.000463645	0.000558628	0.000672408	0.000507518	0.000690463	0.000696934	0.000531051	0.000569141	0.000657264	0.000621761	0.000562977	0.000571525	0.000613327	0.000563314	0.000569154	[EC:1.1.99.-]	0.0171139	0.282489
K00121	0.000584903	0.000520075	0.000536186	0.000511802	0.000452047	0.000476446	0.000555898	0.000521855	0.000501511	0.000538345	0.000507956	0.000452756	0.00049479	0.000591469	0.000422291	0.000554866	0.000563345	0.000528342	0.000512161	0.000554143	0.000534863	0.000529684	0.000535894	0.000572674	0.000545818	0.000510148	S-(hydroxymethyl)glutathione dehydrogenase / alcohol dehydrogenase [EC:1.1.1.284 1.1.1.1]	0.136944	0.766324
K00122	8.71e-05	3.51e-05	4.39e-05	8.43e-05	6.13e-05	6.08e-05	5.69e-05	5.46e-05	9.05e-05	9.84e-05	9.25e-05	6.81e-05	7.8e-05	8.86e-05	6.96e-05	5.52e-05	5e-05	7.74e-05	5.03e-05	5e-05	5.07e-05	7.52e-05	7.78e-05	8.95e-05	7.99e-05	8.05e-05	formate dehydrogenase [EC:1.2.1.2]	0.0606662	0.0579332
K00123	0.00126519	0.000977604	0.00102463	0.00118848	0.00082375	0.00101248	0.00114916	0.00104517	0.00108253	0.001181	0.00109044	0.000870201	0.00114017	0.00131189	0.000990758	0.00111421	0.00109292	0.00108222	0.00107623	0.00110855	0.00108528	0.00110481	0.00115159	0.00124	0.00111407	0.00114141	formate dehydrogenase, alpha subunit [EC:1.2.1.2]	0.885581	0.428691
K00124	0.000230143	0.000215146	0.000217285	0.000199917	0.000139283	0.000201975	0.000224235	0.000211519	0.000170034	0.000188007	0.000171682	0.000141024	0.000195602	0.000246353	0.000194818	0.000236913	0.000228477	0.000191294	0.000210905	0.000228713	0.000217347	0.000199185	0.000208734	0.000219759	0.000197819	0.000206433	formate dehydrogenase, beta subunit	0.0183775	0.233873
K00125	2.83e-11	4.83e-11	1.02e-10	4.71e-10	1.57e-08	2.62e-08	7.95e-08	5.43e-08	9.61e-11	2.24e-09	1.39e-08	2.12e-10	1.32e-10	0	3e-07	0	0	3.62e-08	1.01e-07	6e-08	3.49e-08	1.62e-08	3.11e-10	4.03e-10	1.06e-08	3.32e-08	formate dehydrogenase, beta subunit [EC:1.2.1.2]	0.577569	0.935641
K00126	4.82e-06	5.29e-06	5.53e-06	4.01e-06	2.5e-06	5.94e-06	5.2e-06	4.99e-06	2.42e-06	2.87e-06	2.87e-06	2.33e-06	4.14e-06	8.15e-06	6.36e-06	9.35e-06	8.65e-06	5.65e-06	7.08e-06	8.45e-06	7.8e-06	5.88e-06	6.4e-06	6.57e-06	5.83e-06	6.47e-06	formate dehydrogenase, delta subunit [EC:1.2.1.2]	0.0352173	0.0723977
K00127	0.000108935	0.000135267	0.000127734	6.41e-05	6.22e-05	0.000103979	0.000124682	0.000121468	6e-05	6.62e-05	5.78e-05	5.51e-05	6.77e-05	0.000112349	8.67e-05	0.000131644	0.000134862	8.23e-05	0.00010353	0.000126225	0.000116486	8.61e-05	8.56e-05	9.29e-05	8.65e-05	7.22e-05	formate dehydrogenase, gamma subunit	0.0214166	0.0246679
K00128	0.00425673	0.00337481	0.00335653	0.00387511	0.00295035	0.00326107	0.0033742	0.00345958	0.00414602	0.0042649	0.00390244	0.0033289	0.00367915	0.00418057	0.00353006	0.00347154	0.00356916	0.00368367	0.00340503	0.00355072	0.00354735	0.00383536	0.00388186	0.00413792	0.0037499	0.00369921	aldehyde dehydrogenase (NAD+) [EC:1.2.1.3]	0.765322	0.0812138
K00129	3.84e-08	1.22e-08	1.43e-08	6.12e-07	1.46e-06	1.81e-07	1.6e-07	7.63e-08	5.77e-07	5.53e-07	9.3e-07	1.16e-06	5.45e-07	4.19e-08	3.18e-07	6.25e-08	1.5e-07	1.08e-06	1.24e-07	1.75e-07	9.5e-08	6.78e-07	5.19e-07	7.42e-07	1.15e-06	1.35e-06	aldehyde dehydrogenase (NAD(P)+) [EC:1.2.1.5]	0.0245663	0.0296014
K00130	0.00216484	0.00143159	0.00142703	0.0019875	0.00132818	0.00139631	0.00155802	0.00153121	0.00207857	0.0022081	0.00201646	0.00155644	0.00184172	0.00209297	0.0015463	0.00150145	0.00155609	0.0017863	0.00146279	0.00157051	0.00156272	0.00182695	0.00187408	0.00212719	0.00186203	0.00183155	betaine-aldehyde dehydrogenase [EC:1.2.1.8]	0.611016	0.0431938
K00131	0.000103523	0.000150164	0.000184505	0.000102426	7.64e-05	0.000180765	0.000116594	0.000160841	0.000112939	9.69e-05	6.87e-05	9e-05	0.000109508	0.000111208	0.000187249	0.00017773	0.000159602	0.000101129	0.000173914	0.000142863	0.000157124	0.000134038	0.000140292	8.27e-05	7.81e-05	0.000116271	glyceraldehyde-3-phosphate dehydrogenase (NADP) [EC:1.2.1.9]	0.0381699	0.0176823
K00132	2.14e-06	2.68e-06	2.48e-06	1.46e-06	2.37e-06	1.66e-06	2.49e-06	2.44e-06	1.61e-06	1.76e-06	1.75e-06	1.99e-06	1.47e-06	3.84e-06	3.18e-06	4.52e-06	5.03e-06	3.77e-06	3.53e-06	4.63e-06	4.19e-06	3.59e-06	3.18e-06	3.71e-06	4e-06	2.66e-06	acetaldehyde dehydrogenase (acetylating) [EC:1.2.1.10]	0.224733	0.209522
K00133	0.0005153	0.000491104	0.000488923	0.000585464	0.000627662	0.000505505	0.000498388	0.000505616	0.000588051	0.000574215	0.000607158	0.000624526	0.000586065	0.000493664	0.000527886	0.000462553	0.000465279	0.000547807	0.000493232	0.000477331	0.000485873	0.000531913	0.00051888	0.000526543	0.000547781	0.000545211	aspartate-semialdehyde dehydrogenase [EC:1.2.1.11]	0.0180133	0.0378932
K00134	0.00113784	0.00129169	0.00125899	0.00109174	0.00127965	0.00118855	0.00116053	0.0012477	0.0012412	0.00117505	0.00115897	0.00127269	0.00112601	0.00109654	0.0011435	0.0012011	0.00122334	0.00121176	0.00121772	0.00120821	0.00123005	0.00123227	0.00117971	0.00112098	0.00117175	0.00107196	glyceraldehyde 3-phosphate dehydrogenase [EC:1.2.1.12]	0.844322	0.759975
K00135	0.00310027	0.0025509	0.00257755	0.00275173	0.00193709	0.00244203	0.00251408	0.00261927	0.00291718	0.00298344	0.00265768	0.00224142	0.00262506	0.00305951	0.00247458	0.00265615	0.00269742	0.00259177	0.00260083	0.00266862	0.00271691	0.00278983	0.00284068	0.00292892	0.00260902	0.00264525	succinate-semialdehyde dehydrogenase (NADP+) [EC:1.2.1.16]	0.945063	0.593067
K00137	0.000249623	0.000191758	0.000204757	0.000239543	0.000166469	0.000209825	0.000208198	0.000210731	0.000245196	0.000258686	0.000229032	0.000194292	0.000223754	0.000225748	0.000211108	0.000175461	0.000190524	0.000195731	0.000194017	0.000183989	0.000187421	0.000205674	0.000216134	0.000224513	0.000202867	0.000215438	aminobutyraldehyde dehydrogenase [EC:1.2.1.19]	0.675461	0.161771
K00138	7.84e-05	0.00012183	8.2e-05	4.54e-05	3.75e-05	8.47e-05	7.93e-05	9.45e-05	4.41e-05	3.03e-05	3.64e-05	3.7e-05	4.3e-05	5.27e-05	5.47e-05	6.89e-05	4.79e-05	3.28e-05	6.63e-05	7.03e-05	7.64e-05	4.22e-05	3.94e-05	4.11e-05	3.31e-05	5.58e-05	aldehyde dehydrogenase [EC:1.2.1.-]	0.0195644	0.104397
K00140	0.000986458	0.000630013	0.000666013	0.000921102	0.000632962	0.000679425	0.000731175	0.000700566	0.000946795	0.00102196	0.000934693	0.000717382	0.000860805	0.00100804	0.00074871	0.000750081	0.000767659	0.000853957	0.000697489	0.000752784	0.000741	0.000866339	0.000896771	0.00100532	0.000885224	0.000853401	malonate-semialdehyde dehydrogenase (acetylating) / methylmalonate-semialdehyde dehydrogenase [EC:1.2.1.18 1.2.1.27]	0.391068	0.129953
K00141	0.000146303	0.000112397	0.00012571	0.000145796	9e-05	0.000145853	0.000118812	0.000127597	0.000132065	0.000141552	0.000129844	0.000105676	0.000134381	0.00015748	0.000145554	0.000143524	0.000137297	0.000123661	0.000130521	0.000130944	0.000130308	0.000134559	0.000146646	0.000147141	0.000129475	0.000153807	benzaldehyde dehydrogenase (NAD) [EC:1.2.1.28]	0.953066	0.940497
K00145	0.000380663	0.000367613	0.000376039	0.000432182	0.000463486	0.000386742	0.000379282	0.000385538	0.000426552	0.000415108	0.000439966	0.000458025	0.000431915	0.000377008	0.000326986	0.000363842	0.000367994	0.000412683	0.00038292	0.000375969	0.000384004	0.00040185	0.000390466	0.000399205	0.000418369	0.000412678	N-acetyl-gamma-glutamyl-phosphate reductase [EC:1.2.1.38]	0.0192648	0.00545091
K00146	0.000584822	0.00034295	0.000361415	0.000570551	0.000389168	0.00039187	0.000413913	0.000402461	0.00060416	0.000643875	0.000585296	0.000457234	0.000524225	0.000589869	0.000444042	0.000396425	0.000431264	0.000511308	0.000417068	0.000428382	0.000430015	0.000522092	0.000537885	0.000604176	0.000535266	0.000513473	phenylacetaldehyde dehydrogenase [EC:1.2.1.39]	0.165965	0.0655658
K00147	0.000507149	0.000493255	0.000495433	0.000591677	0.000739017	0.000511272	0.000514095	0.000518313	0.00061128	0.000587742	0.000647274	0.000704889	0.000596146	0.000490273	0.000429068	0.000481453	0.000492515	0.000608316	0.000502616	0.00050877	0.000510103	0.000577096	0.000546641	0.000559293	0.00061746	0.000574817	glutamate-5-semialdehyde dehydrogenase [EC:1.2.1.41]	0.0180133	0.00802281
K00148	1.61e-05	1.65e-05	2.06e-05	1.76e-05	1.85e-05	3.81e-05	2.23e-05	2.28e-05	1.14e-05	1.53e-05	1.85e-05	1.63e-05	1.69e-05	2.46e-05	3.58e-05	3.14e-05	2.38e-05	1.84e-05	2.4e-05	2.24e-05	2.08e-05	1.81e-05	2.28e-05	2.03e-05	1.99e-05	2.58e-05	glutathione-independent formaldehyde dehydrogenase [EC:1.2.1.46]	0.704952	0.0541376
K00150	3.54e-05	5.12e-05	4.36e-05	0.000124537	0.000375972	7.44e-05	8.11e-05	5.84e-05	0.000161788	0.000145061	0.000220284	0.000303554	0.00012697	2.92e-05	4.31e-05	3.9e-05	4.61e-05	0.00018802	5.96e-05	6.1e-05	5.46e-05	0.000128638	0.000103741	0.000120965	0.000195992	0.00013826	glyceraldehyde-3-phosphate dehydrogenase (NAD(P)) [EC:1.2.1.59]	0.0181199	0.0146673
K00151	0.000584071	0.000454519	0.000447002	0.000525755	0.000351078	0.000425665	0.000474134	0.000460884	0.000527101	0.00055844	0.00050881	0.000404109	0.000493365	0.000583368	0.000457243	0.000473189	0.000491519	0.000485162	0.000461486	0.000490737	0.000483372	0.000501997	0.000514964	0.00057172	0.000504074	0.000504191	5-carboxymethyl-2-hydroxymuconic-semialdehyde dehydrogenase [EC:1.2.1.60]	0.93033	0.122331
K00152	1.59e-05	1.65e-05	1.85e-05	1.65e-05	8.74e-06	1.44e-05	1.43e-05	1.54e-05	7.14e-06	8.47e-06	9.35e-06	7.64e-06	1.45e-05	2.36e-05	2.29e-05	2.95e-05	2.49e-05	1.61e-05	2e-05	2.36e-05	2.16e-05	1.74e-05	1.91e-05	1.96e-05	1.75e-05	2.57e-05	salicylaldehyde dehydrogenase [EC:1.2.1.65]	0.0228842	0.0638436
K00153	6.32e-05	8.2e-05	8.32e-05	4.89e-05	3.62e-05	7.18e-05	8.58e-05	7.56e-05	3.7e-05	4.08e-05	3.38e-05	3.37e-05	4.97e-05	5.1e-05	6.92e-05	6.34e-05	6.42e-05	3.76e-05	6.62e-05	6.17e-05	6.18e-05	3.98e-05	4.59e-05	3.89e-05	3.61e-05	4.09e-05	S-(hydroxymethyl)mycothiol dehydrogenase [EC:1.1.1.306]	0.0195644	0.0130807
K00154	0.000336748	0.000331739	0.000301662	0.000321615	0.000311475	0.000330764	0.000297711	0.000326588	0.000358343	0.00033374	0.000332541	0.000331957	0.000311014	0.000309423	0.000306996	0.000283754	0.000276226	0.000303039	0.000309996	0.000296145	0.000311241	0.000315489	0.000304259	0.000309747	0.000303402	0.000320701	coniferyl-aldehyde dehydrogenase [EC:1.2.1.68]	0.488563	0.166906
K00155	0.000514762	0.000347113	0.000361621	0.000468582	0.000309524	0.000317946	0.000376566	0.000366893	0.000479697	0.000516147	0.000464841	0.000357545	0.000435719	0.000513115	0.000382998	0.000387807	0.000403719	0.000428976	0.000355766	0.000390799	0.000381204	0.000439335	0.000451805	0.000511557	0.000446678	0.000433623	[EC:1.2.1.-]	0.805239	0.133549
K00156	7.15e-05	8.66e-05	0.000103025	7.23e-05	5.41e-05	0.000142218	8.27e-05	9.86e-05	7.28e-05	7.52e-05	5.78e-05	6.17e-05	7.96e-05	8.03e-05	0.000127157	0.000109858	8.84e-05	6.68e-05	0.000107853	8.37e-05	9.33e-05	8.99e-05	0.000106751	5.76e-05	5.33e-05	7.35e-05	pyruvate dehydrogenase (quinone) [EC:1.2.5.1]	0.0836785	0.0541376
K00158	2.18e-05	3.43e-05	3.4e-05	1.74e-05	2.08e-05	3.32e-05	2.52e-05	3.55e-05	2.54e-05	2.22e-05	1.55e-05	2.37e-05	1.7e-05	1.44e-05	1.87e-05	1.86e-05	3e-05	1.48e-05	2.72e-05	2.45e-05	2.64e-05	2.04e-05	1.92e-05	1.24e-05	1.53e-05	1.09e-05	pyruvate oxidase [EC:1.2.3.3]	0.0854084	0.164577
K00161	0.000628203	0.000658106	0.000634923	0.000653952	0.000772156	0.000618309	0.000636943	0.000631606	0.000694795	0.000677926	0.000702941	0.000751318	0.000647845	0.000587339	0.000716007	0.000593818	0.000606179	0.00066814	0.000626883	0.000616126	0.000611366	0.000649411	0.000631505	0.000630947	0.000662646	0.000652632	pyruvate dehydrogenase E1 component subunit alpha [EC:1.2.4.1]	0.0993311	0.220432
K00162	0.00113702	0.00123653	0.0011965	0.00105733	0.00100562	0.00109964	0.00110929	0.00117096	0.00112377	0.00107876	0.00102547	0.00105182	0.00105387	0.00107579	0.00117386	0.00112607	0.00113055	0.00104685	0.00116929	0.00113969	0.00116668	0.0011025	0.00109043	0.00103828	0.00101498	0.00105681	pyruvate dehydrogenase E1 component subunit beta [EC:1.2.4.1]	0.0202643	0.0309004
K00163	0.000253418	0.000307536	0.000341514	0.000330559	0.000178089	0.000396347	0.000320859	0.000341374	0.000166703	0.000179649	0.000208	0.000182134	0.00036757	0.000294126	0.000300731	0.000344853	0.000316617	0.000190999	0.000277546	0.000284591	0.000287377	0.000211635	0.000239105	0.000215972	0.000193712	0.000251967	pyruvate dehydrogenase E1 component [EC:1.2.4.1]	0.205992	0.00632805
K00164	0.00126041	0.00123808	0.00123485	0.00114109	0.000710102	0.00119599	0.00115559	0.0012173	0.00111351	0.00111213	0.000971148	0.000840494	0.00112017	0.00121769	0.00134576	0.0011729	0.00114237	0.000973505	0.00123756	0.00115518	0.00120654	0.00108983	0.00113595	0.00106416	0.000929738	0.00109048	2-oxoglutarate dehydrogenase E1 component [EC:1.2.4.2]	0.0181199	0.023006
K00166	4.39e-05	4.6e-05	5.39e-05	4.65e-05	2.48e-05	4.86e-05	4.46e-05	4.93e-05	2.56e-05	2.77e-05	2.67e-05	2.53e-05	4.25e-05	5.13e-05	5.61e-05	6.07e-05	5.33e-05	3.19e-05	5.25e-05	5.07e-05	5.16e-05	3.76e-05	4.33e-05	3.66e-05	3.41e-05	5.95e-05	2-oxoisovalerate dehydrogenase E1 component, alpha subunit [EC:1.2.4.4]	0.0202643	0.0493266
K00167	0.000214278	0.00032498	0.000323609	0.000194853	0.000124709	0.000294962	0.00025747	0.000291073	0.000175934	0.00015134	0.000123178	0.00014712	0.000202649	0.000201912	0.000354974	0.000290119	0.000267896	0.000164279	0.000309575	0.000265421	0.000288061	0.000204606	0.000218428	0.000149721	0.000136499	0.000215045	2-oxoisovalerate dehydrogenase E1 component, beta subunit [EC:1.2.4.4]	0.0180541	0.0265309
K00169	6.97e-07	5.79e-07	1.13e-06	3.29e-06	5.33e-06	3.96e-06	2.07e-06	1.52e-06	2.27e-06	2.8e-06	4.24e-06	4.72e-06	4.9e-06	9.07e-07	4.3e-06	1.32e-06	1.13e-06	4e-06	1.26e-06	1.13e-06	6.09e-07	2.83e-06	3.18e-06	2.85e-06	4.29e-06	6.12e-06	pyruvate ferredoxin oxidoreductase, alpha subunit [EC:1.2.7.1]	0.0204235	0.290757
K00170	4.13e-07	3.41e-07	7.04e-07	1.34e-06	1.58e-07	2.24e-06	1.02e-06	8.48e-07	2.09e-07	7.16e-07	9.81e-07	4.4e-07	2.09e-06	6e-07	2.99e-06	9.11e-07	5.83e-07	1.78e-07	7.51e-07	4.75e-07	2.59e-07	3.65e-07	1.2e-06	5.44e-07	2.26e-07	2.56e-06	pyruvate ferredoxin oxidoreductase, beta subunit [EC:1.2.7.1]	0.937898	0.311444
K00171	1.62e-07	1.2e-07	2.62e-07	4.02e-07	5.27e-08	9.45e-07	3.76e-07	3.14e-07	7.17e-08	2.28e-07	3.1e-07	1.47e-07	6.57e-07	2.46e-07	7.83e-07	3.03e-07	1.45e-07	5.7e-08	2.68e-07	1.39e-07	1.06e-07	1.25e-07	3.87e-07	1.51e-07	6.16e-08	7.88e-07	pyruvate ferredoxin oxidoreductase, delta subunit [EC:1.2.7.1]	0.777075	0.502312
K00172	2.39e-07	1.83e-07	3.98e-07	4.84e-07	8.02e-08	1.38e-06	5.74e-07	4.68e-07	1.06e-07	3.41e-07	4.22e-07	2.08e-07	8.77e-07	3.13e-07	1.68e-06	4.76e-07	2.67e-07	7.76e-08	3.93e-07	2.3e-07	1.44e-07	1.65e-07	5.45e-07	2.21e-07	8.1e-08	1.05e-06	pyruvate ferredoxin oxidoreductase, gamma subunit [EC:1.2.7.1]	0.7849	0.241023
K00174	9.59e-05	0.00016215	9.42e-05	4.6e-05	2.46e-05	0.000101467	9.96e-05	0.000121294	5.26e-05	2.79e-05	3.88e-05	3.73e-05	4.74e-05	4.08e-05	7.24e-05	5.52e-05	3.78e-05	2.33e-05	7.24e-05	7.55e-05	8.39e-05	3.71e-05	2.74e-05	3.53e-05	2.17e-05	6.28e-05	2-oxoglutarate ferredoxin oxidoreductase subunit alpha [EC:1.2.7.3]	0.0476791	0.130501
K00175	4.29e-05	7.19e-05	4.12e-05	2.47e-05	1.06e-05	4.65e-05	4.5e-05	5.5e-05	2.29e-05	1.18e-05	1.91e-05	1.76e-05	2.59e-05	1.78e-05	3.23e-05	2.25e-05	1.48e-05	8.82e-06	3.12e-05	3.23e-05	3.59e-05	1.49e-05	1.05e-05	1.49e-05	9.04e-06	2.96e-05	2-oxoglutarate ferredoxin oxidoreductase subunit beta [EC:1.2.7.3]	0.037419	0.180689
K00176	8.54e-08	9.68e-08	1.31e-07	4.42e-07	2.95e-08	1.61e-07	2.23e-07	2.22e-07	1.62e-08	9.49e-08	2.21e-07	7.5e-08	4.9e-07	4.58e-08	7.97e-07	1.02e-07	1.03e-07	4.62e-08	1.95e-07	1.53e-07	7.79e-08	5.27e-08	6.92e-08	5.71e-08	3.25e-08	7.11e-07	2-oxoglutarate ferredoxin oxidoreductase subunit delta [EC:1.2.7.3]	0.692633	0.223291
K00177	4.74e-08	8.28e-09	1.32e-08	2.35e-07	4e-08	1.18e-07	2.49e-07	2.92e-07	1.38e-09	7.89e-09	1.19e-07	1.43e-09	1.2e-07	2.61e-08	2.11e-06	1.64e-07	1.71e-07	9.04e-08	4.38e-07	3.12e-07	1.67e-07	6.53e-08	8.28e-09	4.87e-08	2.65e-08	4.9e-07	2-oxoglutarate ferredoxin oxidoreductase subunit gamma [EC:1.2.7.3]	0.889107	0.270598
K00179	5.81e-05	8.11e-05	7.25e-05	3.52e-05	3.31e-05	5.56e-05	6.82e-05	6.55e-05	3.24e-05	3.56e-05	3.26e-05	3.07e-05	3.7e-05	5.25e-05	4.23e-05	6.35e-05	6.75e-05	4.16e-05	5.26e-05	6.4e-05	5.72e-05	4.33e-05	4.24e-05	4.83e-05	4.47e-05	3.79e-05	indolepyruvate ferredoxin oxidoreductase, alpha subunit [EC:1.2.7.8]	0.0252937	0.0871305
K00180	4.2e-05	5.86e-05	5.26e-05	2.53e-05	2.38e-05	4.05e-05	4.89e-05	4.71e-05	2.33e-05	2.55e-05	2.3e-05	2.21e-05	2.62e-05	3.73e-05	2.74e-05	4.57e-05	4.85e-05	2.96e-05	3.72e-05	4.56e-05	4.08e-05	3.09e-05	3e-05	3.44e-05	3.19e-05	2.59e-05	indolepyruvate ferredoxin oxidoreductase, beta subunit [EC:1.2.7.8]	0.0214166	0.117766
K00183	1.38e-05	1.72e-05	1.59e-05	7.27e-06	7.74e-06	9.99e-06	1.52e-05	1.49e-05	7.58e-06	8.14e-06	6.76e-06	6.78e-06	7.76e-06	9.35e-06	5.46e-06	1.09e-05	1.16e-05	7.11e-06	8.42e-06	1.09e-05	1.01e-05	7.32e-06	6.87e-06	7.84e-06	7.43e-06	5.42e-06	molybdopterin oxidoreductase, molybdopterin binding subunit [EC:1.2.7.-]	0.0324555	0.131932
K00184	0.00044459	0.000742162	0.000731712	0.000434077	0.000222964	0.00073865	0.000594159	0.000689091	0.000425426	0.000334192	0.000241526	0.000320287	0.000470887	0.000424568	0.000730295	0.000609709	0.000596018	0.000335806	0.000807899	0.000613066	0.00069974	0.000467206	0.000485452	0.000284684	0.000253178	0.000424308	molybdopterin oxidoreductase, iron-sulfur binding subunit [EC:1.2.7.-]	0.0204235	0.035319
K00185	0.000202092	0.000326503	0.000352125	0.000221782	0.000110093	0.000357393	0.000292765	0.000321272	0.000207419	0.000166294	0.00011281	0.000152881	0.000234024	0.000204683	0.000312449	0.000293394	0.00028479	0.000166432	0.000417162	0.000296351	0.000347803	0.000232574	0.000247423	0.000137264	0.000123192	0.000213834	molybdopterin oxidoreductase, membrane subunit [EC:1.2.7.-]	0.0277243	0.0624266
K00186	2.41e-08	7.73e-10	0	1.03e-07	1.57e-08	3.51e-08	7.94e-08	5.89e-08	0	1.7e-09	4.69e-08	0	4.05e-08	1.59e-09	5.81e-07	0	0	3.62e-08	1.2e-07	6.97e-08	4.08e-08	1.76e-08	0	1.49e-08	1.06e-08	1.57e-07	2-oxoisovalerate ferredoxin oxidoreductase, alpha subunit [EC:1.2.7.7]	0.984194	0.875711
K00187	4.26e-08	0	0	1.84e-07	0	3.89e-09	0	1.59e-08	0	1.3e-09	6.29e-08	0	7.88e-08	3.19e-09	1.87e-07	0	0	0	7.56e-09	2.36e-08	1.51e-08	1.1e-09	0	2.93e-08	0	2.51e-07	2-oxoisovalerate ferredoxin oxidoreductase, beta subunit [EC:1.2.7.7]	0.699871	0.873086
K00190	0	3.81e-10	0	0	1.87e-10	1.4e-09	0	1.1e-08	0	2.27e-10	0	0	0	0	6.66e-08	0	0	0	4.18e-09	1.42e-09	3.74e-09	4.82e-09	0	7.22e-11	0	7.55e-10	carbon monoxide dehydrogenase / acetyl-CoA synthase subunit beta [EC:1.2.7.4 1.2.99.2 2.3.1.169]	0.953066	0.826505
K00192	0	0	1.06e-10	1.4e-08	1.98e-09	2.94e-09	9.56e-10	1.02e-09	2.63e-09	7.43e-09	1.54e-08	4.44e-09	1.05e-08	1.92e-09	2.89e-09	2.93e-10	1e-09	6.03e-09	3.94e-09	3.48e-09	1.48e-09	4.35e-09	3.48e-08	3.95e-08	1.36e-08	6.56e-08	acetyl-CoA decarbonylase/synthase complex subunit alpha [EC:1.2.99.2]	0.072132	0.00836438
K00193	1.72e-07	3.32e-07	4.81e-07	5.89e-07	1.72e-06	1.23e-06	6.76e-07	6.24e-07	7.84e-07	7.52e-07	1.09e-06	1.45e-06	6.05e-07	2.09e-07	7.27e-07	5.65e-07	4.56e-07	1.37e-06	4.83e-07	5.96e-07	3.04e-07	9.24e-07	7.52e-07	8.42e-07	1.43e-06	1.13e-06	acetyl-CoA decarbonylase/synthase complex subunit beta [EC:2.3.1.-]	0.0356609	0.0580741
K00194	2.6e-06	2.9e-06	3.07e-06	2.55e-06	1.33e-06	4.07e-06	3.04e-06	2.86e-06	1.39e-06	1.82e-06	1.93e-06	1.45e-06	2.73e-06	4.56e-06	4.09e-06	5.29e-06	4.87e-06	3.12e-06	4.15e-06	4.83e-06	4.45e-06	3.29e-06	3.79e-06	3.77e-06	3.28e-06	3.87e-06	acetyl-CoA decarbonylase/synthase complex subunit delta [EC:2.1.1.245]	0.0390726	0.014218
K00196	2.74e-05	3.64e-05	3.26e-05	1.45e-05	1.55e-05	1.99e-05	3.07e-05	3.01e-05	1.53e-05	1.61e-05	1.35e-05	1.37e-05	1.55e-05	2.24e-05	1.27e-05	2.67e-05	2.94e-05	1.78e-05	2.11e-05	2.74e-05	2.49e-05	1.83e-05	1.69e-05	1.96e-05	1.87e-05	1.29e-05	carbon-monoxide dehydrogenase iron sulfur subunit	0.0332946	0.181607
K00197	0	7.88e-10	0	0	1.59e-08	1.1e-07	7.94e-08	1.3e-07	0	1.97e-09	1.33e-08	0	0	0	1.17e-06	0	0	3.62e-08	1.4e-07	1.65e-07	9.73e-08	3.1e-08	0	3.65e-10	1.06e-08	3.26e-08	acetyl-CoA decarbonylase/synthase complex subunit gamma [EC:2.1.1.245]	0.76718	0.891004
K00198	5.03e-08	2.17e-08	8.49e-08	3.95e-08	1.44e-07	6.97e-07	4.44e-07	5.39e-07	2.26e-08	4.01e-08	1.08e-07	3.4e-08	4.07e-08	1.36e-07	3.42e-06	2.31e-07	8.66e-08	1.68e-07	6.29e-07	4.62e-07	2.71e-07	1.26e-07	6.46e-08	3.6e-08	6.49e-08	1.59e-07	carbon-monoxide dehydrogenase catalytic subunit [EC:1.2.99.2]	0.816115	0.11388
K00200	2.32e-06	1.71e-06	2.35e-06	1.07e-05	1.36e-06	6.06e-06	3.39e-06	2.45e-06	1.5e-06	3.34e-06	2.9e-06	1.67e-06	1.21e-05	5.12e-06	8.33e-06	4.82e-06	3.49e-06	2.75e-06	3.99e-06	3.51e-06	3.3e-06	3.15e-06	6.64e-06	3.69e-06	2.59e-06	1.07e-05	formylmethanofuran dehydrogenase subunit A [EC:1.2.99.5]	0.863109	0.556625
K00201	8.92e-07	3.5e-07	7.81e-07	7.52e-06	3.5e-06	3.75e-06	1.9e-06	1e-06	1.82e-06	3.03e-06	3.27e-06	3.18e-06	8.58e-06	1.96e-06	4.4e-06	1.48e-06	8.34e-07	2.9e-06	1.41e-06	9.89e-07	7.58e-07	2.34e-06	4.41e-06	2.51e-06	2.92e-06	7.25e-06	formylmethanofuran dehydrogenase subunit B [EC:1.2.99.5]	0.12857	0.19717
K00202	7.7e-07	3.1e-07	6.28e-07	8.14e-06	3.86e-06	2.34e-06	1.37e-06	2.14e-06	1.3e-06	1.69e-06	1.4e-06	1.07e-06	7.67e-06	1.8e-06	3.02e-06	1.03e-06	3.99e-07	6.58e-07	9.56e-07	5.8e-07	4.52e-07	1.05e-06	2.6e-06	1.01e-06	5.84e-07	4.45e-06	formylmethanofuran dehydrogenase subunit C [EC:1.2.99.5]	0.228274	0.749254
K00204	0	9.89e-11	0	0	0	0	0	0	0	0	0	0	0	0	0	0	0	0	6.19e-11	0	0	0	0	0	0	0	formylmethanofuran dehydrogenase subunit H [EC:1.2.99.5]	0.242159	0.85719
K00205	1e-06	5.94e-07	8.6e-07	2.41e-06	1.13e-06	1.14e-06	7.49e-07	1.05e-06	5.76e-07	2.53e-06	3.23e-06	1.86e-06	2.28e-06	6.92e-08	6.48e-07	2.09e-07	1e-07	5.49e-08	1.2e-07	9.83e-08	1.36e-07	1.73e-07	8.08e-07	2.45e-07	2.51e-07	2.12e-06	formylmethanofuran dehydrogenase subunit F [EC:1.2.99.5]	0.150703	0.681514
K00207	0.00015042	0.000188928	0.000177474	9.43e-05	8.43e-05	0.000112884	0.000160425	0.00016115	7.98e-05	8.64e-05	7.65e-05	7.39e-05	9.55e-05	0.000152628	0.000102003	0.000184058	0.000185622	0.000115374	0.000138617	0.00017531	0.00016016	0.000119543	0.000116872	0.000131053	0.000121961	0.000111004	dihydropyrimidine dehydrogenase (NADP+) [EC:1.3.1.2]	0.0195644	0.159885
K00208	0.000712969	0.000660614	0.0006558	0.000716666	0.000649139	0.000580722	0.000660862	0.000654541	0.000696118	0.000700952	0.000696721	0.0006646	0.000705809	0.000688158	0.000636627	0.000635596	0.000659193	0.000672582	0.000634525	0.000658643	0.000656376	0.000671036	0.000670102	0.000705192	0.000682422	0.000686672	enoyl-[acyl-carrier protein] reductase I [EC:1.3.1.9]	0.889107	0.0371495
K00210	5.52e-05	3.77e-05	3.73e-05	8.46e-05	3.42e-05	3.03e-05	4.29e-05	4.59e-05	5.28e-05	5.35e-05	6.23e-05	4.72e-05	8.63e-05	4.84e-05	2.86e-05	2.78e-05	3.28e-05	3.93e-05	2.93e-05	3.27e-05	3.48e-05	4e-05	3.93e-05	4.95e-05	4.36e-05	5.18e-05	prephenate dehydrogenase [EC:1.3.1.12]	0.45546	0.0184301
K00211	0	0	0	8.3e-09	0	0	0	0	0	2.05e-08	0	0	9.03e-09	1.12e-08	0	0	0	0	0	0	0	0	0	0	0	0	prephenate dehydrogenase (NADP+) [EC:1.3.1.13]	0.736624	0.705042
K00213	4.86e-07	2.17e-07	3.66e-09	1.49e-06	1.43e-07	8.14e-08	4.65e-07	1.47e-07	9.62e-08	3.06e-07	3.45e-07	2.3e-07	9.44e-07	6.05e-07	3.22e-06	1.29e-07	0	1.36e-07	1.83e-07	1.65e-07	1.52e-07	5.44e-08	5.25e-07	1.3e-07	9.72e-08	1.77e-06	7-dehydrocholesterol reductase [EC:1.3.1.21]	0.92204	0.880914
K00214	4.4e-06	4.61e-06	5.56e-06	6.88e-06	1.97e-05	8.03e-06	6.47e-06	5.81e-06	1.11e-05	1.01e-05	1.18e-05	1.63e-05	7.65e-06	5.63e-06	9.69e-06	8.57e-06	6.71e-06	1.59e-05	9.31e-06	8.65e-06	7.46e-06	1.49e-05	1.31e-05	9.94e-06	1.45e-05	1.03e-05	biliverdin reductase [EC:1.3.1.24]	0.0181199	0.0361475
K00215	0.000351947	0.000335046	0.0003342	0.000407967	0.000447045	0.000340091	0.000347245	0.000348881	0.000405477	0.000399636	0.00042557	0.000440867	0.000411303	0.000336879	0.00036384	0.000312144	0.000328476	0.00038469	0.000333819	0.000330472	0.000332996	0.000367836	0.000360122	0.000369116	0.000387753	0.000376899	dihydrodipicolinate reductase [EC:1.3.1.26]	0.0183363	0.022428
K00216	9.2e-05	8.57e-05	8e-05	8.16e-05	5.95e-05	8.55e-05	7.91e-05	8.23e-05	7.55e-05	7.66e-05	7.78e-05	6.48e-05	7.59e-05	8.71e-05	8.41e-05	8.48e-05	7.25e-05	7.09e-05	7.33e-05	7.81e-05	7.88e-05	7.4e-05	7.69e-05	8.42e-05	7.34e-05	9.14e-05	2,3-dihydro-2,3-dihydroxybenzoate dehydrogenase [EC:1.3.1.28]	0.0312238	0.820587
K00217	2.02e-06	7.41e-07	2.68e-06	3.46e-06	9.82e-07	1.35e-05	3.91e-06	2.52e-06	1.05e-06	1.91e-06	3.08e-06	1.53e-06	3.33e-06	3.84e-06	9.15e-06	4.85e-06	1.02e-06	1.12e-06	3.83e-06	1.42e-06	1.32e-06	1.74e-06	4.12e-06	2.34e-06	1.26e-06	4.98e-06	maleylacetate reductase [EC:1.3.1.32]	0.782196	0.637562
K00218	4.64e-05	6.39e-05	6.42e-05	0.000210287	0.000724483	0.000122177	0.000123709	8.73e-05	0.000309799	0.000281952	0.00042211	0.000589251	0.000217628	4.18e-05	6.28e-05	5.96e-05	9.33e-05	0.000348045	8.02e-05	9.73e-05	7.6e-05	0.000235119	0.000180505	0.000219698	0.000366851	0.000228233	protochlorophyllide reductase [EC:1.3.1.33]	0.0181199	0.0205849
K00219	0.00045846	0.000451569	0.000466813	0.000344937	0.000275868	0.000439451	0.000467564	0.000456412	0.000337419	0.000360143	0.00031785	0.000275108	0.000350553	0.000517779	0.000438272	0.000548315	0.000531002	0.000403894	0.000466455	0.000512675	0.000490545	0.000430378	0.000441091	0.00044079	0.000401591	0.000382591	2,4-dienoyl-CoA reductase (NADPH2) [EC:1.3.1.34]	0.0324555	0.0378932
K00220	0.000249989	0.00017269	0.000177646	0.000230872	0.000154288	0.000134654	0.000192391	0.000177328	0.000216904	0.000235971	0.000216706	0.000165446	0.000215875	0.00024821	0.000150487	0.000189803	0.000194545	0.000207787	0.000174175	0.000195709	0.000189784	0.000206688	0.000210829	0.000245575	0.000217875	0.000213274	cyclohexadieny/prephenate dehydrogenase [EC:1.3.1.43 1.3.1.12]	0.957987	0.0723977
K00221	2.38e-08	6.13e-09	3.6e-08	5.77e-08	6.2e-08	1.12e-07	4.14e-08	1.32e-07	1.38e-08	4.22e-08	6.54e-08	1.96e-08	3.31e-08	8.29e-08	3.55e-07	7.03e-08	3.13e-08	1.94e-08	7.47e-08	2.85e-08	2.78e-08	2.33e-08	6.63e-08	6.17e-08	2.34e-08	1.24e-07	alkylmercury lyase [EC:4.99.1.2]	0.529873	0.286763
K00223	5.79e-07	2.59e-07	4.39e-09	1.78e-06	1.71e-07	9.77e-08	5.55e-07	1.76e-07	1.15e-07	3.65e-07	4.12e-07	2.75e-07	1.13e-06	7.21e-07	3.84e-06	1.54e-07	0	1.63e-07	2.18e-07	1.97e-07	1.81e-07	6.49e-08	6.25e-07	1.55e-07	1.16e-07	2.11e-06	delta24(24(1))-sterol reductase [EC:1.3.1.71]	0.92204	0.880914
K00224	4.37e-08	3.15e-08	1.21e-08	6.21e-08	1.66e-07	4.57e-09	7.05e-08	1.91e-07	2.37e-08	1.32e-08	1.59e-08	4.53e-08	2.03e-08	5.42e-07	2.35e-06	1.97e-08	1.6e-07	7.9e-08	3.61e-07	3.7e-08	1.12e-07	2.14e-07	2.63e-07	1.81e-07	1.09e-07	1.39e-07	[EC:1.3.1.-]	0.976878	0.92111
K00226	0.000413456	0.000493504	0.000489231	0.000483263	0.000567413	0.000486835	0.000504963	0.00048325	0.000446374	0.000427031	0.000468456	0.000529019	0.000491744	0.000430557	0.000452646	0.000478986	0.000483945	0.000484682	0.000526945	0.000495952	0.000502775	0.000466075	0.000456764	0.000445059	0.000483185	0.00048724	dihydroorotate dehydrogenase (fumarate) [EC:1.3.98.1]	0.889107	0.96737
K00228	0.000397243	0.000401288	0.000404163	0.000462301	0.00057781	0.000415315	0.000405614	0.000412158	0.000490495	0.000468883	0.000503989	0.000554555	0.000471235	0.000382633	0.000427531	0.000383628	0.000396028	0.000468175	0.000399601	0.000392395	0.000398937	0.000447327	0.000427779	0.000425793	0.00046357	0.000432722	coproporphyrinogen III oxidase [EC:1.3.3.3]	0.0180133	0.0410028
K00230	1.11e-05	1.84e-05	1.7e-05	1.31e-05	2.96e-05	1.3e-05	1.53e-05	1.51e-05	1.57e-05	1.6e-05	1.87e-05	2.45e-05	1.36e-05	7.24e-06	1.15e-05	9.73e-06	1.1e-05	1.45e-05	9.37e-06	9.86e-06	9.29e-06	1.16e-05	1.08e-05	1.13e-05	1.48e-05	1.05e-05	menaquinone-dependent protoporphyrinogen oxidase [EC:1.3.5.3]	0.422398	0.303514
K00231	9.6e-05	0.000134354	0.000117125	0.000104555	0.0001141	0.000120104	0.000135611	0.000118773	8.03e-05	7.58e-05	9.35e-05	0.000102235	0.000102708	0.00011491	8.79e-05	0.000136538	0.000127842	0.000113791	0.000156587	0.000146225	0.000152005	0.000109625	0.000106487	0.000109567	0.000116956	0.000128656	oxygen-dependent protoporphyrinogen oxidase [EC:1.3.3.4]	0.0747107	0.469675
K00232	2.83e-05	3.27e-05	3.47e-05	2.7e-05	1.78e-05	4.17e-05	3.12e-05	4.1e-05	2.69e-05	2.99e-05	2.2e-05	2.28e-05	2.85e-05	3.38e-05	5.67e-05	4.6e-05	3.92e-05	3.17e-05	5.71e-05	4.9e-05	4.97e-05	4.79e-05	5.38e-05	2.29e-05	2.3e-05	3.8e-05	acyl-CoA oxidase [EC:1.3.3.6]	0.0668754	0.174326
K00239	0.000866029	0.000924407	0.000916848	0.000872861	0.000895199	0.000917971	0.0008793	0.000910356	0.000907709	0.000880922	0.00086563	0.000899428	0.000871778	0.000852797	0.000987952	0.000881297	0.00087973	0.000877157	0.000941381	0.000889294	0.000915921	0.000891348	0.000888821	0.000845179	0.000853873	0.000881791	succinate dehydrogenase flavoprotein subunit [EC:1.3.99.1]	0.216519	0.315855
K00240	0.000366022	0.000361563	0.000359584	0.000342404	0.000260151	0.000353098	0.000349226	0.00035463	0.000339602	0.000338389	0.000309637	0.000284483	0.000336398	0.000354791	0.00038681	0.000342317	0.000334924	0.000313687	0.000366074	0.000341947	0.000354241	0.000333203	0.000342774	0.000327866	0.000304461	0.000334067	succinate dehydrogenase iron-sulfur subunit [EC:1.3.99.1]	0.0180541	0.0608692
K00241	0.00018847	0.000198275	0.000198873	0.00018394	0.000143642	0.000200552	0.000197939	0.000194658	0.000183704	0.000180802	0.000163838	0.000159973	0.000179919	0.000186478	0.000207617	0.000182907	0.000188024	0.00017048	0.000221709	0.000193579	0.000203265	0.000181529	0.000186025	0.000171686	0.000165633	0.00018018	succinate dehydrogenase cytochrome b556 subunit	0.0180541	0.0457027
K00242	7.54e-05	5.62e-05	5.89e-05	6.63e-05	4.54e-05	5.76e-05	6.15e-05	5.89e-05	6.04e-05	6.83e-05	6.34e-05	4.79e-05	6.29e-05	8.49e-05	6.73e-05	7.43e-05	7.28e-05	6.62e-05	6.08e-05	7.07e-05	6.65e-05	6.74e-05	7.11e-05	7.87e-05	6.94e-05	6.95e-05	succinate dehydrogenase membrane anchor subunit	0.965572	0.766324
K00243	0.000136168	0.000226119	0.000219344	0.000116607	6.99e-05	0.000224869	0.000175769	0.000211258	0.000129282	0.000101217	7.05e-05	9.69e-05	0.000126683	0.00012675	0.000227152	0.000183507	0.00018321	9.85e-05	0.000233309	0.000181968	0.000206236	0.000137676	0.000141425	8.29e-05	7.51e-05	0.000114259	hypothetical protein	0.0200245	0.0301087
K00244	0.000124422	0.00017158	0.000151807	9.44e-05	0.000143684	0.000134278	0.000149204	0.000150015	0.000102749	0.000105689	0.000110117	0.000127144	9.92e-05	0.0001187	0.000109174	0.000138466	0.000150871	0.0001195	0.000123283	0.000145714	0.000133803	0.000115273	0.000108704	0.000118386	0.000126126	0.00010338	fumarate reductase flavoprotein subunit [EC:1.3.99.1]	0.191932	0.144683
K00245	1.25e-05	1.83e-05	1.61e-05	8.39e-06	1.22e-05	1.19e-05	1.56e-05	1.49e-05	8.96e-06	9.91e-06	9.49e-06	1.05e-05	9.07e-06	1.13e-05	1.02e-05	1.37e-05	1.52e-05	1.06e-05	1.19e-05	1.42e-05	1.23e-05	1.03e-05	9.74e-06	1.13e-05	1.13e-05	8.41e-06	fumarate reductase iron-sulfur subunit [EC:1.3.99.1]	0.101629	0.129953
K00246	9.67e-06	1.39e-05	1.22e-05	5.47e-06	5.6e-06	8.27e-06	1.12e-05	1.12e-05	5.41e-06	6.26e-06	5.04e-06	5.01e-06	5.88e-06	9.92e-06	8.01e-06	1.13e-05	1.24e-05	7.57e-06	9.67e-06	1.17e-05	1.06e-05	7.91e-06	7.7e-06	8.71e-06	8.01e-06	6.01e-06	fumarate reductase subunit C	0.0324555	0.032062
K00247	7.54e-06	1.13e-05	9.77e-06	4.32e-06	4.27e-06	6.84e-06	8.9e-06	8.64e-06	4.26e-06	4.9e-06	4.02e-06	3.98e-06	4.61e-06	5.88e-06	3.82e-06	7.17e-06	7.97e-06	4.92e-06	6.12e-06	7.6e-06	6.76e-06	5.05e-06	4.75e-06	5.69e-06	5.25e-06	3.86e-06	fumarate reductase subunit D	0.0204235	0.187863
K00248	0.000899158	0.00110954	0.00103141	0.000663041	0.000481092	0.00103299	0.000922209	0.0010392	0.000731211	0.000681546	0.000576557	0.000570458	0.000682536	0.000796366	0.000999938	0.000916625	0.000903074	0.000620957	0.000922086	0.000897227	0.000915119	0.000740371	0.000743175	0.00065028	0.00058287	0.000668289	butyryl-CoA dehydrogenase [EC:1.3.8.1]	0.0440073	0.0135711
K00249	0.00180942	0.00187662	0.00183445	0.00143625	0.00102361	0.00176386	0.00172509	0.00180228	0.00142911	0.00146823	0.00130699	0.00113887	0.00142035	0.00170422	0.0016162	0.00175746	0.00171343	0.00133908	0.00158912	0.00166229	0.00164087	0.00147421	0.00151945	0.00150656	0.00134035	0.00139335	acyl-CoA dehydrogenase [EC:1.3.8.7]	0.0180541	0.0115666
K00252	0.00110537	0.00125649	0.00112973	0.000849857	0.000569271	0.00108142	0.00102221	0.00114066	0.000951495	0.000894642	0.000772084	0.000709051	0.000857585	0.000939806	0.00111115	0.000971881	0.00095413	0.000761497	0.00101419	0.000983346	0.00102639	0.000884802	0.000893067	0.000828092	0.000714506	0.000813679	glutaryl-CoA dehydrogenase [EC:1.3.8.6]	0.0334316	0.022428
K00253	0.000535544	0.00064508	0.000597344	0.000394638	0.000286109	0.000616844	0.000552922	0.000607947	0.000421682	0.000404781	0.000349597	0.000337827	0.000400513	0.000470727	0.000582946	0.000521958	0.000531572	0.000357414	0.000526482	0.000522775	0.000527022	0.000415925	0.000433931	0.000394654	0.000350576	0.000391077	isovaleryl-CoA dehydrogenase [EC:1.3.8.4]	0.0390726	0.0176823
K00254	1.92e-05	3.24e-05	1.7e-05	6.46e-06	4.65e-06	1.76e-05	1.88e-05	2.27e-05	9.69e-06	4.31e-06	6.31e-06	6.47e-06	6.46e-06	7.5e-06	7.77e-06	8.92e-06	5.58e-06	2.99e-06	1.23e-05	1.37e-05	1.58e-05	5.51e-06	3.71e-06	5.84e-06	3.41e-06	8.62e-06	dihydroorotate dehydrogenase [EC:1.3.5.2]	0.0349607	0.184721
K00255	0.000171327	0.000230422	0.000219748	0.000104716	9.66e-05	0.000181311	0.000191045	0.000212716	0.000124082	0.000116961	8.96e-05	0.00010293	0.000113409	0.000167607	0.000152672	0.000209842	0.000226963	0.000130557	0.000191371	0.000207971	0.000206589	0.000153522	0.000148475	0.000133376	0.000126598	0.000107332	long-chain-acyl-CoA dehydrogenase [EC:1.3.8.8]	0.0192648	0.0217723
K00256	1.92e-05	1.85e-05	2.8e-05	2.08e-05	1.15e-05	6.36e-05	2.86e-05	2.61e-05	1.13e-05	1.51e-05	1.71e-05	1.2e-05	2.19e-05	2.33e-05	4.78e-05	3.34e-05	1.55e-05	1.08e-05	2.51e-05	1.45e-05	1.56e-05	1.27e-05	2.36e-05	1.45e-05	9.98e-06	2.44e-05	isoquinoline 1-oxidoreductase [EC:1.3.99.16]	0.115691	0.134873
K00257	0.00234973	0.00266337	0.00259174	0.00181238	0.00130112	0.00251168	0.0023446	0.00252988	0.0018403	0.00182886	0.00159205	0.00146867	0.00182758	0.00224098	0.00240314	0.00248122	0.00241414	0.00174234	0.00229309	0.00234171	0.0023345	0.00197229	0.00202402	0.0018946	0.0016943	0.00183321	[EC:1.3.99.-]	0.0270661	0.00599055
K00258	6.7e-05	0.00010146	9.27e-05	4.51e-05	3.23e-05	8.34e-05	7.66e-05	8.82e-05	4.97e-05	4.09e-05	3.31e-05	3.89e-05	4.88e-05	5.88e-05	9.47e-05	8.25e-05	7.91e-05	4.4e-05	8.05e-05	7.8e-05	8.2e-05	5.39e-05	5.43e-05	4.32e-05	3.77e-05	5.13e-05	[EC:1.3.-.-]	0.0183363	0.0102869
K00259	0.000551001	0.000561651	0.000552456	0.000527841	0.000563529	0.000510718	0.000506539	0.000550865	0.000603567	0.000584203	0.000558788	0.000575077	0.000533519	0.000517504	0.000536804	0.000522016	0.000530509	0.000564716	0.000527747	0.000529271	0.000537225	0.0005769	0.000560054	0.000534046	0.000544337	0.000521231	alanine dehydrogenase [EC:1.4.1.1]	0.298763	0.244515
K00260	5.17e-05	7.87e-05	7.03e-05	4.48e-05	4.3e-05	6.36e-05	5.88e-05	6.67e-05	4.62e-05	3.83e-05	3.83e-05	4.45e-05	4.72e-05	4.65e-05	7.43e-05	6.54e-05	5.88e-05	5.02e-05	6.33e-05	6.22e-05	6.44e-05	5.49e-05	5.52e-05	4.59e-05	4.47e-05	5.66e-05	glutamate dehydrogenase [EC:1.4.1.2]	0.019606	0.035319
K00261	0.000592164	0.000644541	0.000581518	0.000512288	0.000332292	0.00055835	0.0005623	0.00059138	0.000532897	0.000497156	0.000436983	0.000398763	0.000505287	0.00051688	0.000591775	0.000510119	0.00049285	0.000434839	0.000579864	0.000533504	0.000572222	0.000496036	0.000508758	0.000468785	0.000404541	0.0004897	glutamate dehydrogenase (NAD(P)+) [EC:1.4.1.3]	0.0192648	0.0477279
K00262	0.000341639	0.000520452	0.000487447	0.00027094	0.000232095	0.000465529	0.000404839	0.000471256	0.000297171	0.00024981	0.000207468	0.000259394	0.000290898	0.0002863	0.000444784	0.00040055	0.00038402	0.000261043	0.000447002	0.000391245	0.000420575	0.00031928	0.00032071	0.00022814	0.000223552	0.000283755	glutamate dehydrogenase (NADP+) [EC:1.4.1.4]	0.0183363	0.0311764
K00263	0.000165604	0.000253592	0.000222536	0.000131807	0.000181259	0.000240366	0.000195368	0.000232792	0.000178002	0.000147237	0.000140269	0.000189237	0.000143031	0.000159578	0.000234693	0.000204335	0.000226831	0.000166678	0.0002244	0.000216994	0.000228706	0.00018321	0.000171027	0.000141996	0.000158195	0.000146872	leucine dehydrogenase [EC:1.4.1.9]	0.169046	0.0265309
K00265	0.00186839	0.00158891	0.00179693	0.00224591	0.00232898	0.0017766	0.00179801	0.00178939	0.00221686	0.0022191	0.0022776	0.0023132	0.0022404	0.00194106	0.00162438	0.00181575	0.00189802	0.00214256	0.00186654	0.00183457	0.00186764	0.00208621	0.00204933	0.00207724	0.00215176	0.00205463	glutamate synthase (NADPH/NADH) large chain [EC:1.4.1.13 1.4.1.14]	0.0390726	0.0110106
K00266	0.000747273	0.000715434	0.000777061	0.000769593	0.000469123	0.000689595	0.000734748	0.000747486	0.000642218	0.000659763	0.000610337	0.000536802	0.000774915	0.00077867	0.000642039	0.000775032	0.000787072	0.000634496	0.000763646	0.000757804	0.000777032	0.000686608	0.000707577	0.000695861	0.000633517	0.000703692	glutamate synthase (NADPH/NADH) small chain [EC:1.4.1.13 1.4.1.14]	0.0766624	0.164577
K00270	3.22e-06	2.77e-06	3.97e-06	1.84e-06	1.54e-06	2.68e-06	2.83e-06	3.1e-06	1.86e-06	1.91e-06	1.32e-06	1.31e-06	2.12e-06	3.34e-06	2.6e-06	4.1e-06	2.76e-06	1.91e-06	2.35e-06	2.44e-06	3.28e-06	2.03e-06	2.65e-06	1.28e-06	1.35e-06	1.82e-06	phenylalanine dehydrogenase [EC:1.4.1.20]	0.0490045	0.0246679
K00271	3.4e-05	4.94e-05	3.47e-05	1.38e-05	1.23e-05	3.3e-05	3.56e-05	3.95e-05	1.77e-05	1.3e-05	1.37e-05	1.37e-05	1.41e-05	2.86e-05	2.43e-05	3.44e-05	3.15e-05	1.85e-05	3.2e-05	3.74e-05	3.9e-05	2.16e-05	1.99e-05	2.19e-05	1.9e-05	2.05e-05	valine dehydrogenase (NAD+) [EC:1.4.1.23]	0.0252769	0.0477279
K00273	2.15e-06	2.6e-06	2.57e-06	4.63e-05	0.000179099	2.1e-05	2.12e-05	9.27e-06	7.05e-05	6.46e-05	0.000102834	0.000143078	4.85e-05	1.62e-06	5.46e-06	3.22e-06	1.02e-05	7.14e-05	6.58e-06	1.13e-05	5.02e-06	4.5e-05	3.25e-05	4.42e-05	7.58e-05	4.39e-05	D-amino-acid oxidase [EC:1.4.3.3]	0.0181199	0.0246679
K00274	0.000206806	0.000233028	0.000251249	0.000204225	0.000274707	0.00025744	0.000239941	0.00024459	0.00023139	0.000224106	0.000226045	0.000258584	0.000208772	0.00020139	0.000207451	0.000235111	0.000250898	0.000249825	0.000238895	0.000236265	0.000233433	0.000246891	0.000235042	0.000222006	0.000248144	0.00021828	monoamine oxidase [EC:1.4.3.4]	0.957987	0.891277
K00275	0.000233025	0.000250783	0.000257232	0.000228866	0.000156909	0.0002509	0.000229755	0.000252595	0.00021313	0.00020753	0.000191237	0.00018089	0.000233136	0.00022912	0.000245602	0.000244308	0.000238456	0.000196516	0.000248528	0.000233843	0.000244819	0.000218409	0.000221815	0.000202113	0.000187641	0.000210823	pyridoxamine 5'-phosphate oxidase [EC:1.4.3.5]	0.0504528	0.0201835
K00276	1.69e-06	1.72e-06	2.72e-06	9.9e-06	2.69e-05	6.36e-06	4.98e-06	3.88e-06	1.07e-05	1.16e-05	1.7e-05	2.21e-05	9.29e-06	1.52e-06	4.43e-06	2.4e-06	3.63e-06	1.99e-05	2.22e-06	3.51e-06	1.98e-06	1.28e-05	1e-05	1.29e-05	2.16e-05	1.51e-05	primary-amine oxidase [EC:1.4.3.21]	0.0195644	0.0554371
K00278	0.000287049	0.000298716	0.000283301	0.000468603	0.000687548	0.000358423	0.000379303	0.000324183	0.000407944	0.000392938	0.000527774	0.000606446	0.00048207	0.00031964	0.000288039	0.000307425	0.000307376	0.000464779	0.000348401	0.000339311	0.000333374	0.000384848	0.000357293	0.00040453	0.00048969	0.000469606	L-aspartate oxidase [EC:1.4.3.16]	0.0200245	0.00657205
K00279	0	0	1.48e-09	0	3.61e-09	3.16e-09	0	2.32e-09	0	1.59e-09	0	0	0	7.38e-09	1.03e-08	0	0	1.58e-08	5.87e-09	4.77e-09	0	0	5.88e-08	0	3.3e-09	4.49e-09	cytokinin dehydrogenase [EC:1.5.99.12]	0.773364	0.894269
K00281	0.00125673	0.00129072	0.00127957	0.00134745	0.00157936	0.00131064	0.00126899	0.00129701	0.00144762	0.00139858	0.00145119	0.0015467	0.00135547	0.00123745	0.00123715	0.00124436	0.00126823	0.00139392	0.00131137	0.00127685	0.00129155	0.00136702	0.00132114	0.00131988	0.00138355	0.00130446	glycine dehydrogenase [EC:1.4.4.2]	0.0181199	0.0130807
K00282	0.000170642	0.000152336	0.000173831	0.000240683	0.000289397	0.000189165	0.000186011	0.000177786	0.00023637	0.000232457	0.000249253	0.000273578	0.000241242	0.000183918	0.000201693	0.00017284	0.000191404	0.000222551	0.000201491	0.000183028	0.000188947	0.000212977	0.000211609	0.000202538	0.000220821	0.000218738	glycine dehydrogenase subunit 1 [EC:1.4.4.2]	0.0189877	0.0213017
K00283	0.000102782	9.54e-05	0.000107211	0.000162508	0.000194334	0.000125172	0.000133667	0.00011175	0.000135389	0.000137114	0.000158898	0.000172868	0.000160906	0.000109448	0.000119446	9.93e-05	0.000104458	0.000136931	0.000128518	0.000108254	0.000110342	0.000121245	0.00012109	0.000121424	0.000139134	0.000147503	glycine dehydrogenase subunit 2 [EC:1.4.4.2]	0.0490045	0.0184401
K00284	0.00118807	0.0013047	0.00151124	0.00160451	0.00226889	0.00150853	0.00139756	0.00143165	0.00174484	0.00164603	0.00178226	0.00213324	0.0016626	0.00126067	0.00125201	0.0014505	0.00154871	0.00176262	0.00156822	0.00145753	0.00151224	0.00167165	0.00158643	0.00147645	0.00172103	0.00153141	glutamate synthase (ferredoxin) [EC:1.4.7.1]	0.0195644	0.0756735
K00285	0.000738067	0.000605539	0.000607812	0.00063259	0.000449295	0.000611372	0.000620877	0.000604129	0.000624765	0.000663193	0.000616866	0.000488924	0.000601275	0.000768853	0.000588431	0.000696941	0.000656833	0.000630767	0.000599117	0.000656041	0.00063888	0.000645587	0.000667272	0.000734413	0.000647207	0.000652723	D-amino-acid dehydrogenase [EC:1.4.99.1]	0.599655	0.951507
K00286	0.000454691	0.000478176	0.000491959	0.000465911	0.000486924	0.00047218	0.000457606	0.000486309	0.0004917	0.000472604	0.000466515	0.000498282	0.000470205	0.000437977	0.000438223	0.000459332	0.000474034	0.000456198	0.000477782	0.000462772	0.000479392	0.000473158	0.000463572	0.000434808	0.000447257	0.000442725	pyrroline-5-carboxylate reductase [EC:1.5.1.2]	0.885581	0.631927
K00287	0.000256959	0.000173377	0.0001833	0.000267399	0.000148938	0.000203617	0.000186187	0.000200355	0.000272231	0.000276153	0.000249935	0.000200448	0.000259631	0.000231107	0.000218428	0.000157981	0.000163915	0.000196953	0.000188794	0.000167808	0.000184537	0.000216095	0.00022606	0.00022658	0.000194761	0.000222145	dihydrofolate reductase [EC:1.5.1.3]	0.476437	0.122331
K00288	3.97e-06	4.95e-06	4.52e-06	2.04e-06	2.12e-06	2.67e-06	4.17e-06	4.16e-06	2.12e-06	2.27e-06	1.89e-06	1.85e-06	2.2e-06	3.7e-06	2.14e-06	4.24e-06	4.53e-06	2.83e-06	3.34e-06	4.38e-06	4.03e-06	2.88e-06	2.73e-06	3.1e-06	2.92e-06	2.06e-06	methylenetetrahydrofolate dehydrogenase (NADP+) / methenyltetrahydrofolate cyclohydrolase / formyltetrahydrofolate synthetase [EC:1.5.1.5 3.5.4.9 6.3.4.3]	0.038354	0.137092
K00290	0.000180934	0.000210607	0.000216964	0.000152989	0.000104869	0.000156393	0.00021272	0.000193462	9.41e-05	0.00010314	9.8e-05	9.1e-05	0.000147463	0.000232138	0.00015912	0.000269837	0.000262543	0.000166614	0.000237556	0.000257038	0.000247086	0.000172282	0.000177518	0.000186744	0.000174915	0.000192579	saccharopine dehydrogenase (NAD+, L-lysine forming) [EC:1.5.1.7]	0.0183363	0.178962
K00292	5.81e-08	4.22e-08	2.35e-08	2.9e-07	3.5e-08	2.16e-08	1.2e-08	4.39e-08	2.05e-08	2.49e-08	8.43e-08	4.23e-08	2.63e-07	3.64e-08	1.91e-07	3.17e-08	1.16e-08	3.75e-08	3.94e-08	2.81e-08	2.31e-08	6.73e-08	5.16e-08	7.15e-08	4.9e-08	3.2e-07	saccharopine dehydrogenase (NAD+, L-glutamate forming) [EC:1.5.1.9]	0.733241	0.176601
K00293	9.51e-05	0.000148392	0.000139384	6.34e-05	4.98e-05	0.000129714	0.000105995	0.000136329	8.69e-05	7.01e-05	4.84e-05	6.72e-05	7.1e-05	0.000100928	0.000128761	0.000136518	0.000148851	8.04e-05	0.000144674	0.000139836	0.000146673	0.000105354	0.000100343	7.46e-05	7.07e-05	7.35e-05	saccharopine dehydrogenase (NADP+, L-glutamate forming) [EC:1.5.1.10]	0.0264229	0.0400482
K00294	0.000305008	0.000499131	0.00046398	0.000233851	0.000188352	0.000441359	0.000352442	0.000443821	0.000279474	0.000228051	0.00017766	0.000230438	0.000257335	0.000275268	0.000451706	0.000402635	0.000398807	0.000240633	0.000432301	0.000388506	0.000413663	0.000309244	0.000302842	0.000211068	0.000199971	0.000251504	1-pyrroline-5-carboxylate dehydrogenase [EC:1.5.1.12]	0.0183363	0.0243242
K00297	0.000588692	0.000512282	0.000497367	0.000605023	0.000589153	0.000468471	0.000535184	0.00050902	0.000614054	0.000620333	0.000631682	0.000594825	0.000598952	0.000567606	0.000486994	0.00049497	0.000499591	0.00058828	0.000492093	0.000513912	0.000510416	0.000567514	0.00055768	0.000605621	0.000593294	0.000560724	methylenetetrahydrofolate reductase (NADPH) [EC:1.5.1.20]	0.0543821	0.0184401
K00298	4.47e-08	7.21e-07	4.29e-07	2.29e-08	7.32e-08	7.17e-07	2e-07	6.74e-07	7.55e-08	2.06e-08	3.29e-08	7.6e-08	3.81e-08	2.04e-08	2.75e-08	9.91e-08	2.23e-08	4.46e-08	1.02e-06	4.42e-07	3.1e-07	1.16e-07	7.13e-08	5.64e-08	1.3e-07	5.68e-08	N5-(carboxyethyl)ornithine synthase [EC:1.5.1.24]	0.144726	0.951507
K00299	8.71e-06	7.61e-06	1.17e-05	1.83e-05	3.61e-05	2.92e-05	1.6e-05	1.28e-05	1.61e-05	1.79e-05	2.51e-05	3.01e-05	1.86e-05	1.27e-05	2.11e-05	1.73e-05	1.29e-05	2.47e-05	1.31e-05	1.25e-05	1.01e-05	1.87e-05	1.91e-05	1.95e-05	2.66e-05	2.45e-05	FMN reductase [EC:1.5.1.38]	0.0364627	0.166906
K00301	0.000109207	9.59e-05	9.83e-05	0.000121061	0.000171646	8.1e-05	0.000100979	9.3e-05	0.000118869	0.000126029	0.000144822	0.000152036	0.000115413	0.000127457	9.2e-05	0.000129148	0.000127678	0.000155548	0.000100756	0.000125634	0.000112174	0.000136409	0.000130487	0.000151571	0.000165573	0.000148997	sarcosine oxidase [EC:1.5.3.1]	0.0543821	0.0272965
K00302	0.00209151	0.00121819	0.00123406	0.00188788	0.00127372	0.00102678	0.00142732	0.00132147	0.00200626	0.00217506	0.0019609	0.00145351	0.00174799	0.0019041	0.00113262	0.00118557	0.00128154	0.00165741	0.0011238	0.00128634	0.00125345	0.0016473	0.00166829	0.00199703	0.00173608	0.00157518	sarcosine oxidase, subunit alpha [EC:1.5.3.1]	0.281265	0.0515087
K00303	0.00101395	0.000634327	0.000638793	0.000899337	0.000619204	0.000526506	0.000720709	0.000671081	0.000944062	0.00102516	0.000927778	0.00069645	0.000835675	0.00094255	0.00056926	0.000635169	0.000676792	0.000812443	0.000582486	0.000673188	0.0006508	0.000807944	0.000818063	0.000975113	0.000853018	0.000776448	sarcosine oxidase, subunit beta [EC:1.5.3.1]	0.54111	0.0431938
K00304	0.000159798	9.97e-05	9.98e-05	0.00013954	9.64e-05	8.01e-05	0.000113175	0.000105579	0.000148347	0.000160768	0.000144529	0.000108216	0.000129933	0.000152009	8.88e-05	0.000103458	0.000111473	0.000130141	9.42e-05	0.000110428	0.000106535	0.00012952	0.000130057	0.000155738	0.00013649	0.000120944	sarcosine oxidase, subunit delta [EC:1.5.3.1]	0.54111	0.0378932
K00305	0.000247978	0.000176918	0.00017413	0.000206988	0.000147469	0.000132652	0.000188621	0.000178094	0.000216358	0.000234422	0.00021026	0.000161467	0.000194913	0.000231427	0.000137354	0.00017262	0.000184141	0.000195373	0.000151716	0.000180535	0.000172429	0.000195376	0.000195413	0.0002324	0.00020515	0.000182464	sarcosine oxidase, subunit gamma [EC:1.5.3.1]	0.755187	0.0932776
K00309	1.28e-05	1.71e-05	2.23e-05	1.72e-05	8.33e-06	1.96e-05	1.31e-05	1.66e-05	1.37e-05	1.26e-05	1.1e-05	1.11e-05	1.78e-05	1.28e-05	2.33e-05	1.92e-05	1.59e-05	1.16e-05	1.56e-05	1.2e-05	1.41e-05	1.41e-05	1.56e-05	1.23e-05	9.21e-06	1.77e-05	[EC:1.5.3.-]	0.0668754	0.161704
K00311	0.000480893	0.000311096	0.00033426	0.000452938	0.000324097	0.000330711	0.000365705	0.000337114	0.00043446	0.000475413	0.000448674	0.000347235	0.000424003	0.000489707	0.000335929	0.000375612	0.000362245	0.000415883	0.000324449	0.000361199	0.000347741	0.000411045	0.000429034	0.000484414	0.000434551	0.000426815	electron-transferring-flavoprotein dehydrogenase [EC:1.5.5.1]	0.638201	0.117766
K00313	1.61e-05	1.91e-05	2.25e-05	3.69e-05	4.31e-05	2.73e-05	3.03e-05	2.11e-05	2.16e-05	2.58e-05	3.34e-05	3.69e-05	3.49e-05	1.97e-05	2.37e-05	2.16e-05	2.04e-05	2.97e-05	3.11e-05	2.38e-05	2.4e-05	2.43e-05	2.6e-05	2.7e-05	3.21e-05	4.25e-05	electron transfer flavoprotein-quinone oxidoreductase [EC:1.5.5.-]	0.235378	0.0251615
K00314	0.000842445	0.000516423	0.000521725	0.000752781	0.000507076	0.000395341	0.000580448	0.000542806	0.000782437	0.000848076	0.000766125	0.000572133	0.000694063	0.000754508	0.000439726	0.00049042	0.000522756	0.000651818	0.000446708	0.000521697	0.000504776	0.000649066	0.000654042	0.00078833	0.000686711	0.000637583	sarcosine dehydrogenase [EC:1.5.8.3]	0.54111	0.0431938
K00315	0.00291873	0.00176758	0.00174107	0.002512	0.00173561	0.0013603	0.00201562	0.00184461	0.00278075	0.00300701	0.00269381	0.00200889	0.00234159	0.00254693	0.00139492	0.00153735	0.00173025	0.00224763	0.00148672	0.00173287	0.00168557	0.00222214	0.00221353	0.0027049	0.00235831	0.00202486	dimethylglycine dehydrogenase [EC:1.5.8.4]	0.54111	0.0361475
K00316	8.95e-07	5.56e-07	1.64e-06	4.43e-07	8.38e-07	7.01e-06	2.32e-06	2.34e-06	4.72e-07	6.55e-07	9.81e-07	6.33e-07	3.92e-07	1.54e-06	4.68e-06	3.08e-06	1.11e-06	4.31e-07	2.18e-06	9.05e-07	7.23e-07	4.29e-07	1.11e-06	5.28e-07	3.73e-07	9.18e-07	spermidine dehydrogenase [EC:1.5.99.6]	0.782196	0.0313676
K00317	7.66e-06	7.09e-06	9.37e-06	7.26e-06	4.72e-06	6.3e-06	5.51e-06	7.38e-06	5.15e-06	1e-05	5.7e-06	5.46e-06	6.97e-06	8.22e-06	1.46e-05	1.25e-05	1.04e-05	6.86e-06	9.34e-06	8.66e-06	9.25e-06	7.94e-06	1.3e-05	6.87e-06	6.36e-06	9.38e-06	trimethylamine dehydrogenase [EC:1.5.8.2]	0.2026	0.0977632
K00318	0.000180447	0.000305696	0.00028116	0.000129164	8.45e-05	0.00026905	0.000204637	0.000267798	0.000162435	0.000125991	8.92e-05	0.000120001	0.000146823	0.000155205	0.000275389	0.00023514	0.000224904	0.000125705	0.000260404	0.000223867	0.000247957	0.000173966	0.00017273	0.000106131	9.44e-05	0.000136074	proline dehydrogenase [EC:1.5.99.8]	0.0183363	0.0243242
K00320	2.87e-06	3.79e-06	4.05e-06	3.6e-06	1.36e-06	2.89e-06	3.59e-06	4.04e-06	1.39e-06	2.45e-06	2.51e-06	1.96e-06	3.2e-06	2.83e-06	2.51e-06	3.65e-06	3.74e-06	2.19e-06	2.57e-06	3.39e-06	3.19e-06	2.44e-06	2.37e-06	2.58e-06	2.48e-06	4.33e-06	coenzyme F420-dependent N5,N10-methenyltetrahydromethanopterin reductase [EC:1.5.99.11]	0.0214166	0.258661
K00322	5.12e-05	6.22e-05	6.65e-05	5.06e-05	3.97e-05	5.78e-05	6.81e-05	6.42e-05	2.97e-05	3.35e-05	3.27e-05	3.2e-05	4.97e-05	8.46e-05	8.67e-05	0.000100354	9.94e-05	6.26e-05	9.06e-05	9.53e-05	8.93e-05	6.38e-05	6.52e-05	6.74e-05	6.46e-05	7.32e-05	NAD(P) transhydrogenase [EC:1.6.1.1]	0.0231784	0.0146673
K00324	0.000605274	0.000448404	0.00040352	0.000624385	0.000735777	0.000440266	0.000502193	0.000459027	0.000691841	0.000707402	0.000744745	0.00071088	0.000600152	0.00055783	0.000533022	0.000402873	0.000427201	0.000639395	0.000405158	0.00045509	0.000432016	0.000579014	0.0005657	0.000657333	0.000666473	0.000601594	NAD(P) transhydrogenase subunit alpha [EC:1.6.1.2]	0.0200245	0.016814
K00325	0.000483443	0.000390114	0.000342575	0.00049002	0.000611513	0.000376261	0.000427357	0.000390151	0.000541208	0.000551552	0.00058949	0.000578375	0.000475741	0.00045296	0.00042932	0.000351478	0.000374911	0.0005258	0.000344582	0.000395135	0.000369745	0.000473602	0.000459343	0.000532981	0.000550966	0.000486979	NAD(P) transhydrogenase subunit beta [EC:1.6.1.2]	0.0204235	0.0236379
K00329	3.59e-05	4.63e-05	4.18e-05	2.03e-05	2.03e-05	2.56e-05	3.96e-05	3.9e-05	2e-05	2.18e-05	1.82e-05	1.79e-05	2.16e-05	3.73e-05	2.09e-05	4.36e-05	4.73e-05	2.9e-05	3.4e-05	4.44e-05	4.07e-05	3e-05	2.84e-05	3.2e-05	3.04e-05	2.24e-05	NADH dehydrogenase [EC:1.6.5.3]	0.0245663	0.181607
K00330	0.000116401	0.000112075	0.000115922	0.000144156	0.000176126	0.00011334	0.000129843	0.000112808	0.000125751	0.000129746	0.000150118	0.000158787	0.000146116	0.000134156	0.000132822	0.000133238	0.000133151	0.000152571	0.000125145	0.000133347	0.00012459	0.000135404	0.000130747	0.000143456	0.000157271	0.000146881	NADH-quinone oxidoreductase subunit A [EC:1.6.5.3]	0.0504528	0.139817
K00331	0.000195936	0.00014234	0.000151418	0.000244465	0.000276226	0.000160152	0.000186301	0.000156056	0.000229306	0.000240411	0.000264878	0.000259397	0.000238002	0.000211343	0.000204154	0.000172271	0.000175575	0.000243266	0.000174276	0.000181076	0.000170795	0.000215407	0.000211616	0.000239767	0.000252667	0.000236839	NADH-quinone oxidoreductase subunit B [EC:1.6.5.3]	0.02204	0.0272965
K00332	0.000229931	0.000187785	0.000198938	0.000262098	0.000225837	0.000200771	0.000215181	0.000202485	0.000231491	0.000240122	0.000246597	0.000231623	0.000258637	0.000235661	0.000239871	0.000198973	0.000207113	0.000224929	0.000207749	0.000206932	0.000203466	0.000219214	0.000221265	0.000232564	0.00023192	0.000237149	NADH-quinone oxidoreductase subunit C [EC:1.6.5.3]	0.11327	0.361093
K00333	0.000388866	0.000318571	0.000338392	0.000503453	0.000551072	0.000340379	0.000388265	0.00033949	0.00043966	0.000455037	0.000517748	0.000517375	0.000502241	0.000419492	0.000396033	0.00036825	0.000367515	0.00047436	0.000361683	0.000373712	0.000355729	0.000423856	0.000413118	0.000460374	0.000491492	0.000474589	NADH-quinone oxidoreductase subunit D [EC:1.6.5.3]	0.020561	0.0528356
K00334	0.000301421	0.000275366	0.000278642	0.000286386	0.00017884	0.000220644	0.000278563	0.000265498	0.000225169	0.000243846	0.000233425	0.000190225	0.000282263	0.000299376	0.000245498	0.000275618	0.000270737	0.000235395	0.000246998	0.000268245	0.00025952	0.000238879	0.000246071	0.000268408	0.00024391	0.000264362	NADH-quinone oxidoreductase subunit E [EC:1.6.5.3]	0.115691	0.25157
K00335	0.000833357	0.000573384	0.000596852	0.000837308	0.00052326	0.000558981	0.000672435	0.000611953	0.000751055	0.000816054	0.000767617	0.000588937	0.00080655	0.000839692	0.000676794	0.00062451	0.000632752	0.000700507	0.000613264	0.000641514	0.000628291	0.000697944	0.000723932	0.000811419	0.000724882	0.000742411	NADH-quinone oxidoreductase subunit F [EC:1.6.5.3]	0.957987	0.0932776
K00336	0.000708517	0.000530893	0.000561522	0.000750383	0.000420468	0.000520968	0.000607904	0.000569927	0.000586885	0.000639743	0.000622206	0.000476055	0.000734186	0.000738776	0.00064737	0.000599815	0.00059297	0.000575446	0.000564173	0.000592131	0.000582521	0.000583652	0.000613719	0.000673841	0.000597326	0.000664826	NADH-quinone oxidoreductase subunit G [EC:1.6.5.3]	0.99272	0.993649
K00337	0.000329177	0.000278889	0.00029295	0.000423067	0.000456014	0.000301142	0.000337813	0.000295456	0.000363366	0.00037743	0.000429086	0.000429681	0.000424173	0.000357093	0.000372606	0.000318889	0.00031906	0.000397151	0.000314282	0.000324242	0.00030659	0.000355407	0.000348609	0.000385221	0.000411226	0.000400515	NADH-quinone oxidoreductase subunit H [EC:1.6.5.3]	0.0195644	0.137092
K00338	0.000188615	0.000174377	0.000183643	0.000190364	0.000121783	0.000173181	0.000183162	0.000179222	0.000158962	0.00016668	0.000156166	0.000136393	0.000188904	0.000203659	0.000188252	0.000190456	0.000194525	0.000159265	0.000191564	0.000190549	0.000189705	0.000167873	0.000173156	0.000176059	0.000162754	0.000177281	NADH-quinone oxidoreductase subunit I [EC:1.6.5.3]	0.0819158	0.0346813
K00339	0.00021758	0.000170086	0.000180472	0.00025075	0.000209685	0.000178559	0.000202103	0.00018062	0.000211842	0.000226772	0.000238776	0.000212881	0.000247835	0.000231561	0.000198402	0.000195757	0.000193355	0.000218946	0.00019059	0.000196402	0.00019049	0.000207758	0.000210598	0.000232042	0.000226522	0.000229634	NADH-quinone oxidoreductase subunit J [EC:1.6.5.3]	0.181645	0.0831466
K00340	0.000123181	8.72e-05	9e-05	0.000143877	0.000143015	9.7e-05	0.000114323	9.54e-05	0.000135269	0.000143204	0.000152188	0.000141581	0.000140333	0.000132278	0.000124592	0.000101853	0.000108025	0.000140983	0.000108699	0.000111466	0.000106451	0.000128093	0.000127227	0.000144577	0.000147104	0.000138372	NADH-quinone oxidoreductase subunit K [EC:1.6.5.3]	0.0415279	0.0265309
K00341	0.000694827	0.000601093	0.000632509	0.000831403	0.000825781	0.00060922	0.000705729	0.000625592	0.000712226	0.000741565	0.000810379	0.000788308	0.000833152	0.000748999	0.000707542	0.000680067	0.000678612	0.00078179	0.000665019	0.000683274	0.000658956	0.000717599	0.000707276	0.0007763	0.000804793	0.000788556	NADH-quinone oxidoreductase subunit L [EC:1.6.5.3]	0.0717763	0.0953849
K00342	0.000597084	0.000442842	0.000468511	0.000728834	0.000756918	0.00047645	0.000554355	0.000481962	0.000664551	0.000696703	0.000758457	0.000725298	0.000721184	0.000635105	0.000589667	0.000515753	0.000527528	0.000720615	0.000517208	0.000539901	0.000512608	0.000641556	0.000629645	0.000712564	0.000749214	0.000705575	NADH-quinone oxidoreductase subunit M [EC:1.6.5.3]	0.0235099	0.0335773
K00343	0.000672129	0.000441276	0.000468512	0.000786307	0.000644835	0.000483768	0.000565094	0.000494215	0.000708613	0.000749536	0.000775562	0.00067148	0.000761967	0.000681979	0.000639419	0.000492217	0.000498556	0.000669344	0.000521065	0.000522111	0.000513012	0.000627012	0.000634288	0.000721496	0.00069481	0.000705037	NADH-quinone oxidoreductase subunit N [EC:1.6.5.3]	0.110913	0.0477279
K00344	0.000935177	0.00113125	0.00110924	0.000762257	0.000641436	0.00109062	0.00107741	0.00108072	0.000680949	0.000700409	0.00064109	0.000642741	0.000770364	0.000976536	0.00111165	0.00114071	0.00114958	0.000780863	0.00108254	0.00111623	0.00108282	0.000852121	0.000891917	0.000826336	0.000783992	0.000845267	NADPH2:quinone reductase [EC:1.6.5.5]	0.0180541	0.00545091
K00346	0.000187574	0.000299125	0.000269717	0.000121662	9.52e-05	0.000263695	0.000204333	0.000278556	0.000177863	0.00013375	9.63e-05	0.000131401	0.000135283	0.000158453	0.000220841	0.00022273	0.00023472	0.000130012	0.000255707	0.000232198	0.000260647	0.000183137	0.000177717	0.000121196	0.000107357	0.000134859	Na+-transporting NADH:ubiquinone oxidoreductase subunit A [EC:1.6.5.-]	0.0356609	0.0608692
K00347	0.000150674	0.000239082	0.000220714	0.000100385	7.79e-05	0.000216533	0.000164556	0.000226471	0.000146217	0.000111826	7.83e-05	0.000107867	0.000112443	0.00013084	0.00018226	0.000183205	0.00019589	0.000107131	0.00021037	0.00018948	0.000213429	0.000151607	0.000148877	9.91e-05	8.82e-05	0.000108454	Na+-transporting NADH:ubiquinone oxidoreductase subunit B [EC:1.6.5.-]	0.0356609	0.0608692
K00348	0.000109949	0.000175645	0.000158728	7.28e-05	5.55e-05	0.000155363	0.000120221	0.000163891	0.000104779	7.94e-05	5.71e-05	7.7e-05	8.15e-05	9.37e-05	0.000130289	0.000132524	0.000140669	7.76e-05	0.000151188	0.000137345	0.000154481	0.000108482	0.000105917	7.29e-05	6.37e-05	7.81e-05	Na+-transporting NADH:ubiquinone oxidoreductase subunit C [EC:1.6.5.-]	0.0356609	0.0608692
K00349	9.05e-05	0.000144511	0.000123911	5.6e-05	4.25e-05	0.000121922	9.73e-05	0.000130961	8.15e-05	5.97e-05	4.47e-05	5.96e-05	6.16e-05	7.23e-05	9.8e-05	9.96e-05	0.000104329	5.65e-05	0.000114716	0.00010622	0.000119462	8.04e-05	7.65e-05	5.53e-05	4.77e-05	6.18e-05	Na+-transporting NADH:ubiquinone oxidoreductase subunit D [EC:1.6.5.-]	0.0356609	0.0640097
K00350	7.55e-05	0.000118548	0.000114492	5.35e-05	4.34e-05	0.000112031	8.4e-05	0.00011513	7.72e-05	6.02e-05	4.22e-05	5.79e-05	6.01e-05	7.09e-05	0.000100303	0.000100522	0.000106237	6.19e-05	0.000113459	0.000101615	0.000112335	8.57e-05	8.34e-05	5.55e-05	5.05e-05	6e-05	Na+-transporting NADH:ubiquinone oxidoreductase subunit E [EC:1.6.5.-]	0.0390726	0.0608692
K00351	0.000150762	0.0002387	0.000220643	0.000104844	7.78e-05	0.000214757	0.00016563	0.000224776	0.000144818	0.000111392	7.99e-05	0.000105988	0.000118201	0.000133747	0.000187748	0.000187995	0.000196085	0.000110843	0.000210508	0.000189986	0.000213453	0.000153574	0.000152277	0.000103608	9.01e-05	0.000114553	Na+-transporting NADH:ubiquinone oxidoreductase subunit F [EC:1.6.5.-]	0.0356609	0.0608692
K00354	8.44e-06	8.45e-06	1.07e-05	6.75e-06	5.65e-06	2.51e-05	1.31e-05	1.18e-05	4.88e-06	6.9e-06	7.94e-06	5.79e-06	7.11e-06	1.49e-05	2.09e-05	1.87e-05	1.66e-05	9.84e-06	1.65e-05	1.55e-05	1.5e-05	1.07e-05	1.36e-05	1.17e-05	1.03e-05	1.11e-05	NADPH2 dehydrogenase [EC:1.6.99.1]	0.144726	0.00599055
K00355	5.01e-05	6.57e-05	6.3e-05	3.55e-05	3.25e-05	5.9e-05	5.87e-05	6.09e-05	2.89e-05	3.17e-05	2.95e-05	2.75e-05	3.53e-05	4.98e-05	4.44e-05	6.21e-05	6.01e-05	3.66e-05	5.01e-05	5.69e-05	5.19e-05	3.84e-05	3.97e-05	4.16e-05	3.84e-05	3.6e-05	NAD(P)H dehydrogenase (quinone) [EC:1.6.5.2]	0.0200245	0.0164615
K00356	9.09e-05	7.53e-05	7.76e-05	8.08e-05	5.53e-05	6.21e-05	7.57e-05	7.65e-05	7.17e-05	8.12e-05	7.19e-05	5.71e-05	7.83e-05	9.55e-05	7.24e-05	8.84e-05	8.93e-05	7.66e-05	7.27e-05	8.45e-05	8.07e-05	7.92e-05	8.48e-05	8.87e-05	7.88e-05	7.9e-05	NADH dehydrogenase [EC:1.6.99.3]	0.406838	0.816069
K00358	4.77e-05	7.02e-05	5.82e-05	3.96e-05	2.63e-05	5.35e-05	5.99e-05	5.82e-05	2.95e-05	2.55e-05	2.75e-05	2.73e-05	3.89e-05	4.94e-05	4.3e-05	5.95e-05	5.58e-05	3.63e-05	6.58e-05	6.38e-05	6.59e-05	3.98e-05	4e-05	4.12e-05	3.68e-05	4.79e-05	[EC:1.6.99.-]	0.0181199	0.100039
K00359	0.000111312	0.000117926	0.000144792	0.000135863	7.68e-05	0.000144124	0.00013313	0.000135623	0.000119701	0.000119035	9.39e-05	9.51e-05	0.000133758	0.000104231	0.000121613	0.00010839	0.000117528	8.67e-05	0.000165627	0.000114325	0.000138116	0.000107368	0.00012244	8.46e-05	7.64e-05	0.000117872	NADH oxidase [EC:1.6.-.-]	0.108653	0.384467
K00360	6.01e-05	8.39e-06	1.26e-05	6.56e-05	3.64e-05	1.99e-05	2.5e-05	2.04e-05	7.34e-05	8.04e-05	7.36e-05	4.93e-05	5.85e-05	5.11e-05	2.94e-05	9.58e-06	1.22e-05	4.88e-05	1.83e-05	1.58e-05	1.86e-05	4.7e-05	4.97e-05	6.19e-05	5.11e-05	5.02e-05	nitrate reductase (NADH) [EC:1.7.1.1]	0.0701017	0.0309004
K00362	0.000372903	0.000461471	0.000542099	0.000524675	0.000267973	0.000551595	0.000556245	0.000509596	0.00029997	0.000291719	0.000290907	0.000298087	0.000547955	0.000377039	0.000409446	0.000459741	0.000425087	0.000292304	0.000598419	0.000442849	0.000503301	0.000351369	0.000398268	0.000279818	0.000265688	0.000444739	nitrite reductase (NAD(P)H) large subunit [EC:1.7.1.4]	0.0730417	0.164577
K00363	5.2e-05	6.81e-05	7e-05	4.46e-05	3.49e-05	6.02e-05	7.04e-05	6.34e-05	3.42e-05	3.59e-05	3.16e-05	3.17e-05	4.54e-05	3.86e-05	3.99e-05	4.98e-05	4.75e-05	3.31e-05	5.54e-05	4.73e-05	4.88e-05	3.58e-05	3.91e-05	3.33e-05	3.14e-05	3.91e-05	nitrite reductase (NAD(P)H) small subunit [EC:1.7.1.4]	0.0183775	0.0459382
K00364	7.31e-06	1.15e-05	1.55e-05	6.92e-06	5.46e-06	1.89e-05	9.69e-06	1.24e-05	6.09e-06	8.69e-06	5.46e-06	5.58e-06	8.46e-06	8.7e-06	1.94e-05	1.41e-05	1.2e-05	6.56e-06	1.34e-05	9.72e-06	1.28e-05	7.42e-06	1.18e-05	5.7e-06	4.9e-06	7.6e-06	GMP reductase [EC:1.7.1.7]	0.0487218	0.0184251
K00365	0.000108612	6.88e-05	7e-05	9.5e-05	6.34e-05	5.61e-05	7.67e-05	7.17e-05	9.89e-05	0.000107927	9.78e-05	7.3e-05	8.82e-05	0.000104952	6.33e-05	7.46e-05	7.82e-05	8.94e-05	6.61e-05	7.74e-05	7.44e-05	8.92e-05	9e-05	0.000107334	9.41e-05	8.67e-05	urate oxidase [EC:1.7.3.3]	0.593424	0.0565886
K00366	1.04e-05	1.15e-05	2.84e-05	0.000121418	0.000285764	5.76e-05	7.6e-05	2.88e-05	0.000116584	0.000107898	0.000168352	0.000229063	0.000118447	2.23e-05	2.52e-05	2.47e-05	3.52e-05	0.000168768	7.88e-05	4.87e-05	4.93e-05	0.00010932	9.17e-05	0.000106868	0.000176704	0.000138626	ferredoxin-nitrite reductase [EC:1.7.7.1]	0.0324555	0.0115666
K00367	3.3e-05	4.08e-05	4.49e-05	8.69e-05	0.000244846	6.41e-05	6.22e-05	5.08e-05	0.000112419	0.000103841	0.000148782	0.000201026	9.27e-05	3.12e-05	4.7e-05	4.69e-05	5.54e-05	0.000166132	4.8e-05	5.57e-05	4.48e-05	0.000119618	9.66e-05	0.000107357	0.000171651	0.000113307	ferredoxin-nitrate reductase [EC:1.7.7.2]	0.0180541	0.035319
K00368	9.63e-05	0.000129151	0.000135213	0.000102522	5.65e-05	0.00013007	0.000112237	0.000128637	7.86e-05	7.48e-05	6.22e-05	6.72e-05	0.000108428	0.000105817	0.000123946	0.000128441	0.000126897	7.9e-05	0.000132531	0.000119828	0.000125961	9.41e-05	0.000101978	8.08e-05	7.13e-05	0.000104665	nitrite reductase (NO-forming) [EC:1.7.2.1]	0.0195644	0.0205849
K00370	0.000148735	0.000161608	0.0001792	0.000199202	8.04e-05	0.000177165	0.000165313	0.000177162	7.64e-05	8.81e-05	0.000116507	9.62e-05	0.000205453	0.000117638	0.000136006	0.000141296	0.000105904	6.49e-05	9.99e-05	0.000100377	0.000100594	7.41e-05	8.89e-05	8.67e-05	7.56e-05	0.000155165	nitrate reductase 1, alpha subunit [EC:1.7.99.4]	0.172112	0.0775515
K00371	0.000143993	0.000105752	0.000113172	0.000155397	8.25e-05	0.000106904	0.000118401	0.000117138	0.000117618	0.000129589	0.000131086	9.94e-05	0.000151885	0.000117647	9.29e-05	8.91e-05	8.06e-05	9.04e-05	7.59e-05	7.99e-05	8e-05	9.26e-05	9.91e-05	0.000113425	9.77e-05	0.000120434	nitrate reductase 1, beta subunit [EC:1.7.99.4]	0.945063	0.200176
K00372	0.000284641	0.000343455	0.000363313	0.000305651	0.000328884	0.000350872	0.000383186	0.00034285	0.000236547	0.000241951	0.000261673	0.000288397	0.000317196	0.000252285	0.000243059	0.000307745	0.000277745	0.000281139	0.000318951	0.000286053	0.000287788	0.000267822	0.00027386	0.000245087	0.000277861	0.000301765	nitrate reductase catalytic subunit [EC:1.7.99.4]	0.0836785	0.835035
K00373	2.76e-05	3e-05	3.31e-05	3.54e-05	1.52e-05	3.19e-05	3.02e-05	3.25e-05	1.42e-05	1.66e-05	2.13e-05	1.77e-05	3.62e-05	2.09e-05	2.38e-05	2.55e-05	1.89e-05	1.15e-05	1.76e-05	1.77e-05	1.77e-05	1.32e-05	1.59e-05	1.55e-05	1.35e-05	2.75e-05	nitrate reductase 1, delta subunit	0.177949	0.0721502
K00374	2.55e-05	2.84e-05	3.06e-05	2.85e-05	1.42e-05	2.96e-05	2.86e-05	2.99e-05	1.32e-05	1.53e-05	1.8e-05	1.52e-05	2.91e-05	1.9e-05	2.2e-05	2.32e-05	1.79e-05	1.11e-05	1.65e-05	1.7e-05	1.65e-05	1.24e-05	1.47e-05	1.43e-05	1.25e-05	2.31e-05	nitrate reductase 1, gamma subunit [EC:1.7.99.4]	0.11825	0.0410028
K00375	0.000770064	0.000536823	0.000559353	0.00066835	0.000478143	0.000597207	0.000628587	0.000579591	0.000671363	0.000738985	0.000685699	0.000526599	0.000633007	0.000775951	0.000589725	0.000620541	0.000600894	0.000635481	0.000555881	0.000599254	0.000579591	0.000636875	0.000670984	0.000753238	0.000665556	0.000647621	GntR family transcriptional regulator / MocR family aminotransferase	0.715864	0.144683
K00376	0.000294204	0.000418673	0.00034868	0.000184091	0.000136195	0.000306662	0.000312069	0.000357623	0.000189659	0.000158924	0.000143049	0.000148355	0.000195876	0.000237306	0.000239294	0.000303359	0.000267961	0.000174059	0.000283284	0.00029601	0.000298193	0.000214367	0.000205609	0.000188231	0.000161257	0.000209084	nitrous-oxide reductase [EC:1.7.2.4]	0.020561	0.0213017
K00378	1.85e-06	1.65e-06	1.51e-06	1.5e-06	1.08e-06	2.13e-06	1.88e-06	2.4e-06	7.56e-07	2.67e-06	1.69e-06	9.76e-07	1.22e-06	3.81e-06	1.72e-05	2.79e-06	2.51e-06	2.05e-06	3.51e-06	3e-06	2.88e-06	2.39e-06	2.93e-06	2.51e-06	2.14e-06	3.15e-06	hydroxylamine reductase [EC:1.7.-.-]	0.692633	0.187659
K00380	0.000338482	0.000490023	0.000507742	0.000330833	0.000194398	0.000607516	0.000482088	0.00049321	0.000278029	0.000237138	0.000197977	0.0002309	0.000326976	0.000386739	0.000430328	0.000515449	0.000461831	0.000284213	0.000640402	0.000497274	0.000563039	0.000363862	0.000396892	0.000273538	0.000252109	0.000376482	sulfite reductase (NADPH) flavoprotein alpha-component [EC:1.8.1.2]	0.0183775	0.0431938
K00381	0.000555054	0.000442734	0.000487907	0.000592446	0.00052146	0.000510376	0.000539949	0.000468951	0.000572214	0.000600946	0.000577988	0.000527058	0.000578171	0.000571087	0.000623926	0.000505955	0.000493159	0.0005565	0.000538248	0.000506202	0.000497266	0.00054651	0.000576035	0.000573571	0.000547021	0.000574737	sulfite reductase (NADPH) hemoprotein beta-component [EC:1.8.1.2]	0.228274	0.286763
K00382	0.00201598	0.00189236	0.00191226	0.00204039	0.00182899	0.00192103	0.00191587	0.00190953	0.00202775	0.0020424	0.00199838	0.00191279	0.00202782	0.00195434	0.00206283	0.00183991	0.00183366	0.00187975	0.00190485	0.00184359	0.00188454	0.00190626	0.00194588	0.00192637	0.00185958	0.00193549	dihydrolipoamide dehydrogenase [EC:1.8.1.4]	0.681736	0.531076
K00383	0.000652013	0.000616799	0.000645523	0.000743973	0.000911036	0.000608613	0.000631787	0.000644265	0.000787199	0.000777845	0.000825899	0.000881582	0.000750715	0.00064291	0.000586281	0.000623599	0.000674157	0.000772677	0.000609566	0.000641586	0.000636131	0.000731947	0.000702122	0.000733208	0.000782951	0.000700546	glutathione reductase (NADPH) [EC:1.8.1.7]	0.020561	0.0184251
K00384	0.00117034	0.00130917	0.00127068	0.00127297	0.00140301	0.00130837	0.0012676	0.00127547	0.00130797	0.00124606	0.00128098	0.00137688	0.00128816	0.00109912	0.00140045	0.00116585	0.00116006	0.0012291	0.00129926	0.00119426	0.00123337	0.00123191	0.00122691	0.0011516	0.00118419	0.00123368	thioredoxin reductase (NADPH) [EC:1.8.1.9]	0.45546	0.962607
K00385	1.17e-09	5.59e-09	1.96e-09	1.79e-08	4.72e-09	8.73e-09	2.17e-08	3.98e-08	7.91e-09	2.73e-07	6.27e-09	9.54e-09	6.07e-09	1.66e-08	1.46e-07	7.73e-09	8.44e-09	1.19e-08	3.28e-08	1.72e-08	1.02e-08	8.1e-09	9.4e-09	6.5e-09	1.12e-08	9.45e-09	anaerobic sulfite reductase subunit C [EC:1.8.1.-]	0.90205	0.361093
K00386	2.57e-05	3.21e-05	2.94e-05	1.37e-05	1.44e-05	1.84e-05	2.82e-05	2.77e-05	1.42e-05	1.51e-05	1.26e-05	1.26e-05	1.46e-05	2.06e-05	1.19e-05	2.39e-05	2.58e-05	1.58e-05	1.86e-05	2.42e-05	2.23e-05	1.63e-05	1.52e-05	1.73e-05	1.64e-05	1.21e-05	[EC:1.8.2.-]	0.0364627	0.181607
K00387	6.57e-06	7.8e-06	7.48e-06	4.36e-06	3.36e-06	4.9e-06	6.58e-06	6.67e-06	3.36e-06	3.73e-06	3.36e-06	3.05e-06	4.45e-06	6.29e-06	4.69e-06	7.32e-06	7.05e-06	4.57e-06	5.49e-06	6.89e-06	6.31e-06	4.71e-06	4.85e-06	5.28e-06	4.78e-06	5.19e-06	sulfite oxidase [EC:1.8.3.1]	0.0195644	0.133549
K00389	2.3e-05	3.71e-05	3.07e-05	2e-05	1.76e-05	2.65e-05	2.56e-05	3.01e-05	1.95e-05	1.72e-05	1.76e-05	1.9e-05	2.21e-05	1.41e-05	1.9e-05	2.05e-05	1.88e-05	1.68e-05	2.11e-05	2.08e-05	2.22e-05	1.76e-05	1.69e-05	1.58e-05	1.51e-05	1.97e-05	putative membrane protein	0.0183363	0.274783
K00390	0.000190427	0.000225756	0.000220013	0.000217657	0.000340781	0.000233605	0.000230198	0.000218428	0.0002384	0.000225645	0.000256914	0.000306306	0.000223384	0.000187623	0.000220904	0.000213249	0.000212853	0.000252638	0.000222794	0.00022122	0.000216238	0.000230832	0.000218925	0.00021712	0.000252237	0.000235263	phosphoadenosine phosphosulfate reductase [EC:1.8.4.8]	0.104056	0.139817
K00392	8.7e-05	0.000133097	0.000168919	0.000249995	0.000686461	0.00020428	0.000186059	0.000148976	0.000329111	0.000298599	0.000408795	0.000564964	0.000264591	0.000105925	0.00022662	0.000182272	0.000178546	0.000392327	0.000197565	0.000181611	0.000165906	0.000303317	0.000260422	0.000251142	0.0003798	0.000284591	sulfite reductase (ferredoxin) [EC:1.8.7.1]	0.0183775	0.0504773
K00394	1.64e-05	1.57e-05	2.25e-05	0.0001049	1.59e-05	2.49e-05	3.18e-05	3.95e-05	1.41e-05	6.7e-06	3.78e-05	3.02e-05	0.000114792	1.75e-05	1.2e-05	6.82e-06	8.21e-06	2.66e-06	2.32e-05	1.14e-05	2.2e-05	5.2e-06	6.94e-06	7.54e-06	7.63e-06	4.34e-05	adenylylsulfate reductase, subunit A [EC:1.8.99.2]	0.963021	0.550923
K00395	3.47e-06	3.47e-06	4.22e-06	1.99e-05	2.24e-06	3.92e-06	4.74e-06	7.75e-06	2.78e-06	1.2e-06	8.02e-06	6.44e-06	2.29e-05	2.88e-06	2.18e-06	1.13e-06	1.64e-06	3.44e-07	1.88e-06	1.55e-06	3.21e-06	8.85e-07	6.83e-07	1.3e-06	1.42e-06	7.82e-06	adenylylsulfate reductase, subunit B [EC:1.8.99.2]	0.982405	0.408687
K00397	0.000246742	3.47e-05	5.68e-05	0.000277321	0.000148049	7.09e-05	9.59e-05	7.87e-05	0.000293514	0.000321911	0.000297287	0.000198337	0.00024464	0.000210837	0.000125389	4.8e-05	4.83e-05	0.000197509	7.09e-05	6.31e-05	7.18e-05	0.000191123	0.000203956	0.00025281	0.000208123	0.000222793	anaerobic dimethyl sulfoxide reductase [EC:1.8.99.-]	0.0701017	0.0213017
K00399	7.42e-09	4.12e-09	1.35e-09	2.39e-09	2.34e-10	1.02e-09	1.32e-09	1.24e-10	5.63e-10	8.82e-10	3.32e-09	1.9e-09	2.12e-09	1.57e-09	1.4e-08	6.42e-10	0	2.41e-09	0	2.11e-09	9.83e-11	7.53e-10	3.96e-10	2e-10	8.65e-10	1.72e-09	methyl-coenzyme M reductase alpha subunit [EC:2.8.4.1]	0.443683	0.988524
K00400	0.000136934	0.000116626	0.000103079	0.000124062	0.000132285	9.99e-05	0.000111648	0.000114685	0.0001488	0.000145729	0.000142727	0.000136741	0.000120388	0.000117963	9e-05	9.1e-05	9.85e-05	0.000126678	9.81e-05	0.000104353	0.000105707	0.000126212	0.000119484	0.00013131	0.000129338	0.000115711	methyl coenzyme M reductase system, component A2	0.0819158	0.00742942
K00404	0.000409018	0.000562432	0.000556382	0.000439937	0.000230453	0.000520062	0.0005391	0.000519838	0.000278239	0.000264321	0.000253189	0.000253034	0.000468326	0.000453386	0.000612076	0.000557059	0.00053104	0.000334359	0.000586784	0.00053072	0.00054196	0.000374454	0.000405048	0.000341704	0.000308977	0.000439537	cytochrome c oxidase cbb3-type subunit I [EC:1.9.3.1]	0.0183363	0.0155448
K00405	0.000203654	0.000284976	0.000271764	0.000210998	0.000108248	0.000254272	0.00026104	0.0002588	0.000138329	0.000127777	0.000122212	0.000122026	0.000225442	0.000220228	0.000299784	0.000270841	0.000257701	0.000160688	0.000283988	0.00026045	0.000266896	0.000182239	0.000195656	0.000166098	0.000147376	0.000212967	cytochrome c oxidase cbb3-type subunit II	0.0183363	0.0163716
K00406	0.000284333	0.000386737	0.000368008	0.000243957	0.000153649	0.000318379	0.000332646	0.000348846	0.000180747	0.00017	0.000163261	0.000162316	0.000262852	0.000285527	0.000310096	0.000359854	0.000332185	0.000211654	0.000327451	0.000331955	0.000333582	0.000238407	0.000245648	0.00021972	0.000200067	0.000249745	cytochrome c oxidase cbb3-type subunit III	0.0183363	0.0184401
K00407	1.64e-05	1.98e-05	1.93e-05	9.29e-06	1.01e-05	1.74e-05	1.92e-05	1.95e-05	9.04e-06	9.63e-06	8.69e-06	8.28e-06	9.85e-06	1.92e-05	1.52e-05	2.32e-05	2.32e-05	1.4e-05	1.78e-05	2.15e-05	1.98e-05	1.44e-05	1.4e-05	1.55e-05	1.46e-05	1.16e-05	cytochrome c oxidase cbb3-type subunit IV	0.0623084	0.024968
K00410	0.000111699	6.97e-05	7.26e-05	0.000116779	7.01e-05	5.16e-05	7.32e-05	7.24e-05	9.98e-05	0.000109339	0.000102554	7.48e-05	0.000106056	0.000100975	7.55e-05	6.78e-05	6.53e-05	8.44e-05	5.81e-05	6.72e-05	6.44e-05	8.46e-05	8.9e-05	0.000104443	8.93e-05	0.000102229	ubiquinol-cytochrome c reductase cytochrome b/c1 subunit	0.74488	0.0851082
K00411	0.000118945	0.00010884	0.000108575	0.000111853	8.32e-05	9.25e-05	0.000111138	0.000109272	9.01e-05	9.6e-05	9.74e-05	8.39e-05	0.000113442	0.000120734	0.00010581	0.000112958	0.000113438	9.63e-05	9.13e-05	0.000109415	0.000103192	9.64e-05	9.78e-05	0.000109418	0.000101821	0.000100565	ubiquinol-cytochrome c reductase iron-sulfur subunit [EC:1.10.2.2]	0.255812	0.139817
K00412	0.000355569	0.000260547	0.000274456	0.000349074	0.000212286	0.000248649	0.000285493	0.000279721	0.000296077	0.000320011	0.000309251	0.00023759	0.000342824	0.0003624	0.000294058	0.000294539	0.000291682	0.000285844	0.000247183	0.000283428	0.000277197	0.000288681	0.00030205	0.000336575	0.000298551	0.000307186	ubiquinol-cytochrome c reductase cytochrome b subunit	0.984194	0.572304
K00413	0.000241468	0.000156313	0.000166309	0.000244211	0.000142948	0.000154555	0.000180152	0.000174935	0.000211557	0.000228521	0.000221239	0.000165161	0.000236568	0.000244484	0.000192518	0.000181233	0.000181257	0.000194492	0.000156042	0.000178307	0.000174	0.000195487	0.000202702	0.000232584	0.0002043	0.00020919	ubiquinol-cytochrome c reductase cytochrome c1 subunit	0.945063	0.142406
K00423	4.78e-05	5.27e-05	5.9e-05	4.13e-05	2.86e-05	8.33e-05	5.92e-05	5.53e-05	2.66e-05	3.1e-05	3.17e-05	2.67e-05	4.31e-05	4.36e-05	5.38e-05	5.61e-05	4.43e-05	2.9e-05	4.1e-05	4.08e-05	3.85e-05	3.11e-05	3.76e-05	3.34e-05	2.98e-05	4.12e-05	L-ascorbate oxidase [EC:1.10.3.3]	0.0606662	0.0146673
K00425	0.000240618	0.000308164	0.000356122	0.000237799	0.000218659	0.000372716	0.000307853	0.000317146	0.000209135	0.00020999	0.000189316	0.00021455	0.00023982	0.000293409	0.000343899	0.000381085	0.000369841	0.000261639	0.000372939	0.000343502	0.000349446	0.000285742	0.000303293	0.000246351	0.000249472	0.000282858	cytochrome d ubiquinol oxidase subunit I [EC:1.10.3.-]	0.0309399	0.014218
K00426	0.000186202	0.000238857	0.000274185	0.000180971	0.000166028	0.000290665	0.000239887	0.000243808	0.000159073	0.000160476	0.000144483	0.000163731	0.000183105	0.000226611	0.000254438	0.000293092	0.000282896	0.000199581	0.00028871	0.000266359	0.000269541	0.000217964	0.000230243	0.000187749	0.000191827	0.000214866	cytochrome d ubiquinol oxidase subunit II [EC:1.10.3.-]	0.0341087	0.0163716
K00427	1.74e-06	3.54e-07	2.98e-06	1.14e-06	2.13e-06	1.63e-05	4.88e-06	4.93e-06	9.51e-07	3.24e-06	2.55e-06	1.34e-06	1.13e-06	4.66e-06	1.52e-05	7.35e-06	2.06e-06	1.16e-06	5.65e-06	1.58e-06	1.82e-06	1.14e-06	3.53e-06	2.01e-06	1.01e-06	3.52e-06	L-lactate permease	0.99272	0.124128
K00428	0.00110856	0.00155335	0.00125633	0.000681849	0.000521171	0.00125807	0.0011883	0.00134137	0.000868449	0.000723235	0.000592526	0.000662707	0.000716427	0.000933497	0.00126221	0.00109295	0.00113073	0.00070475	0.00126985	0.00122793	0.00127652	0.000897515	0.0008687	0.000730588	0.00065585	0.000748637	cytochrome c peroxidase [EC:1.11.1.5]	0.0324555	0.035319
K00432	0.000205139	0.000225238	0.000194274	0.000194607	0.000250274	0.000227467	0.000207818	0.000206884	0.00021839	0.000210577	0.00022618	0.000236169	0.000197309	0.000180894	0.000223633	0.000180338	0.000162378	0.000203854	0.000181035	0.000179657	0.000177605	0.000194459	0.000190385	0.000190632	0.000200672	0.000192481	glutathione peroxidase [EC:1.11.1.9]	0.174873	0.241023
K00433	9.75e-05	9.31e-05	0.000115284	0.000108536	6.28e-05	0.000130787	8.32e-05	0.000110075	0.000100294	0.000100017	8.89e-05	8.44e-05	0.000102964	9.99e-05	0.000136093	0.000111137	0.000111238	8.25e-05	0.000116449	9.99e-05	0.000109577	9.87e-05	0.000110495	9.31e-05	8.2e-05	0.000117184	chloride peroxidase [EC:1.11.1.10]	0.41168	0.142235
K00435	9.74e-05	8.94e-05	9.92e-05	8.47e-05	6.65e-05	9.64e-05	8.59e-05	9.56e-05	9.04e-05	9.27e-05	8.09e-05	7.52e-05	8.3e-05	0.000112202	9.47e-05	0.000112141	0.000119105	9.43e-05	0.000103477	0.000108846	0.00011033	0.00010152	0.000104485	0.00010211	9.51e-05	9.15e-05	peroxiredoxin [EC:1.11.1.-]	0.104056	0.109281
K00436	4.14e-05	5.3e-05	5.2e-05	0.000128559	0.000403371	8.13e-05	8.7e-05	5.92e-05	0.000169579	0.000161397	0.000237405	0.000322426	0.000143089	6.82e-05	8.38e-05	8.3e-05	9.5e-05	0.000227076	7.53e-05	9.64e-05	7.48e-05	0.000160507	0.000134201	0.000157008	0.000237073	0.000162186	hydrogen dehydrogenase [EC:1.12.1.2]	0.0181199	0.0515087
K00437	2.15e-07	1.05e-07	2.08e-07	8.44e-07	1.51e-07	1.03e-06	3.56e-07	3.79e-07	1.41e-07	4.76e-07	3.41e-07	1.74e-07	2.08e-06	4.99e-07	1.22e-06	2.83e-07	2.08e-07	1.44e-07	3.6e-07	1.76e-07	2.46e-07	2.08e-07	8.41e-07	2.75e-07	1.21e-07	1.71e-06	cytochrome-c3 hydrogenase [EC:1.12.2.1]	0.867258	0.769447
K00440	1.12e-07	1.32e-07	1.71e-07	8.23e-07	1.5e-06	2.76e-07	2.95e-07	2.77e-07	5.92e-07	6.34e-07	1.04e-06	1.26e-06	8.39e-07	9.27e-08	3.67e-07	6.31e-08	1.51e-07	1.1e-06	9.61e-08	1.84e-07	9.51e-08	7.18e-07	5.16e-07	7.24e-07	1.19e-06	1.23e-06	coenzyme F420 hydrogenase alpha subunit [EC:1.12.98.1]	0.0214166	0.0246679
K00441	7.62e-05	9.99e-05	8.99e-05	6.43e-05	0.000138314	6.41e-05	9.45e-05	8.66e-05	7.89e-05	7.84e-05	9.18e-05	0.000113733	6.77e-05	4.33e-05	2.82e-05	5.25e-05	6.21e-05	8.56e-05	4.39e-05	5.97e-05	5.02e-05	6.68e-05	5.55e-05	6.92e-05	9.11e-05	5.7e-05	coenzyme F420 hydrogenase beta subunit [EC:1.12.98.1]	0.85816	0.0812138
K00442	2.14e-09	1.07e-08	6.67e-09	1.34e-07	5.88e-09	1.49e-08	2.94e-09	3.46e-08	8.69e-09	1.96e-08	3.79e-08	1.59e-08	1.16e-07	2.19e-08	3.3e-07	1.08e-08	1.99e-09	1.82e-08	1.91e-08	4.09e-08	3.65e-08	3.94e-08	1.45e-08	4.99e-08	2.68e-08	1.53e-07	coenzyme F420 hydrogenase delta subunit	0.510726	0.598415
K00443	4.47e-08	1.33e-08	1.61e-08	1.22e-07	1.93e-08	7.66e-08	1.77e-08	3.64e-08	2.22e-08	4.85e-08	6.6e-08	2.86e-08	1.07e-07	9.75e-08	3.41e-07	3.64e-08	7.41e-09	2.44e-08	5.45e-08	2.67e-08	2.72e-08	3.24e-08	7.75e-08	7.16e-08	3.66e-08	2.74e-07	coenzyme F420 hydrogenase gamma subunit [EC:1.12.98.1]	0.356409	0.907298
K00446	5.01e-05	6.25e-05	6.13e-05	3.66e-05	2.79e-05	5.03e-05	5.43e-05	5.38e-05	2.59e-05	2.91e-05	2.78e-05	2.53e-05	3.54e-05	6.49e-05	4.99e-05	7.89e-05	7.6e-05	4.76e-05	5.91e-05	7.2e-05	6.55e-05	5.01e-05	5.1e-05	5.52e-05	5.07e-05	5.11e-05	catechol 2,3-dioxygenase [EC:1.13.11.2]	0.0181199	0.133549
K00448	6.08e-05	7.57e-05	7.26e-05	3.81e-05	3.46e-05	5.65e-05	6.78e-05	6.7e-05	3.29e-05	3.56e-05	3.22e-05	3.06e-05	3.86e-05	6.6e-05	4.9e-05	8.05e-05	7.99e-05	4.9e-05	6.07e-05	7.45e-05	6.79e-05	5.16e-05	5.08e-05	5.55e-05	5.2e-05	4.77e-05	protocatechuate 3,4-dioxygenase, alpha subunit [EC:1.13.11.3]	0.0183363	0.0876485
K00449	0.000107805	0.000145069	0.000127755	7.59e-05	5.49e-05	0.000109863	0.000115262	0.000125808	7.03e-05	6.48e-05	5.76e-05	5.73e-05	8e-05	9.66e-05	0.000100935	0.000118887	0.000116279	7.24e-05	0.000101829	0.000112329	0.000112754	8.29e-05	8.3e-05	8.17e-05	7.11e-05	8.33e-05	protocatechuate 3,4-dioxygenase, beta subunit [EC:1.13.11.3]	0.0183363	0.016814
K00450	4.13e-05	5.35e-05	5.7e-05	2.74e-05	2.24e-05	4.68e-05	4.54e-05	4.57e-05	2.36e-05	2.68e-05	2.24e-05	2.08e-05	2.91e-05	4.67e-05	3.09e-05	6.24e-05	5.24e-05	3.44e-05	4.43e-05	4.81e-05	4.81e-05	3.83e-05	4.02e-05	3.45e-05	3.26e-05	3.03e-05	gentisate 1,2-dioxygenase [EC:1.13.11.4]	0.0195644	0.117766
K00451	0.000419753	0.000425498	0.000397705	0.0003323	0.000225923	0.000377652	0.000369038	0.000397214	0.000375449	0.000367394	0.000317945	0.000276174	0.000331273	0.000363893	0.000370544	0.000345716	0.00034207	0.000303879	0.000351975	0.000345631	0.000358117	0.000339776	0.000341958	0.000334568	0.000291563	0.000304829	homogentisate 1,2-dioxygenase [EC:1.13.11.5]	0.0245663	0.0236379
K00452	8.76e-05	0.000141774	0.000125049	5.84e-05	4.05e-05	0.000119168	0.000100915	0.000118049	6.96e-05	5.57e-05	4.29e-05	5.16e-05	6.58e-05	7.64e-05	0.000128287	0.000111902	0.000102906	6.24e-05	0.000114559	0.000105609	0.0001121	8.07e-05	8.05e-05	5.74e-05	4.89e-05	6.34e-05	3-hydroxyanthranilate 3,4-dioxygenase [EC:1.13.11.6]	0.0183363	0.0251615
K00453	0.0002388	0.000389173	0.000327617	0.000147375	0.000108819	0.000339857	0.000278128	0.000326292	0.000188808	0.000145908	0.000115756	0.000145629	0.000162219	0.000200562	0.000362581	0.000284278	0.00027562	0.000152054	0.000309344	0.00028723	0.000302116	0.000202456	0.000200146	0.000144359	0.000126108	0.000165852	tryptophan 2,3-dioxygenase [EC:1.13.11.11]	0.0200245	0.023006
K00455	5.7e-06	6.25e-06	6.97e-06	3.13e-06	3.39e-06	1.16e-05	7.72e-06	7.03e-06	3.18e-06	4.11e-06	3.58e-06	3.06e-06	3.3e-06	8.93e-06	9.57e-06	1.1e-05	9.35e-06	5.65e-06	8.58e-06	8.68e-06	8.02e-06	6e-06	6.83e-06	6.55e-06	5.84e-06	5.19e-06	3,4-dihydroxyphenylacetate 2,3-dioxygenase [EC:1.13.11.15]	0.26391	0.00523274
K00456	1.25e-08	0	0	4.97e-08	0	0	0	0	0	0	2.02e-08	0	2.67e-08	1.69e-09	2.44e-08	0	0	0	1.1e-09	1.71e-09	3.41e-09	0	0	1.55e-08	0	1.33e-07	cysteine dioxygenase [EC:1.13.11.20]	0.778538	0.92111
K00457	0.000564557	0.000471397	0.000468513	0.000491908	0.000333245	0.000503494	0.000452069	0.000482732	0.000562951	0.000562336	0.000494243	0.000414564	0.000479651	0.000524621	0.0005301	0.000447478	0.000436311	0.000453813	0.000468025	0.000440383	0.000460681	0.000497357	0.000507621	0.000499878	0.000437945	0.000453134	4-hydroxyphenylpyruvate dioxygenase [EC:1.13.11.27]	0.885581	0.754028
K00459	0.000326213	0.000395736	0.000392137	0.000274025	0.000191401	0.000462174	0.00037267	0.000384347	0.000280235	0.000278766	0.000233302	0.000232074	0.000279778	0.000355842	0.000597928	0.000409405	0.000418397	0.000277077	0.000434562	0.000402784	0.000397536	0.000325222	0.000353118	0.000285602	0.000260264	0.000291502	nitronate monooxygenase [EC:1.13.12.16]	0.039974	0.00961388
K00460	2.26e-07	5.94e-08	3.7e-07	1.58e-06	6.24e-06	2.33e-06	1.18e-06	8.69e-07	2.4e-06	2.28e-06	3.59e-06	4.86e-06	1.62e-06	3.98e-07	1.29e-06	8.1e-07	7.72e-07	4.5e-06	7.4e-07	7.67e-07	3.66e-07	2.78e-06	2.23e-06	2.76e-06	4.76e-06	2.78e-06	arachidonate 15-lipoxygenase [EC:1.13.11.33]	0.0181199	0.0897775
K00462	0.000121643	1.64e-05	2.68e-05	0.000132376	7.39e-05	4.37e-05	5.07e-05	4.04e-05	0.000146991	0.000160983	0.000147732	9.89e-05	0.000117563	0.000104902	6.12e-05	2.25e-05	2.51e-05	9.83e-05	3.65e-05	3.18e-05	3.64e-05	9.49e-05	0.000100663	0.000124599	0.00010303	0.000101734	biphenyl-2,3-diol 1,2-dioxygenase [EC:1.13.11.39]	0.0730417	0.0346813
K00463	1.02e-07	3.18e-08	1.18e-07	2.77e-07	3.94e-08	1.92e-07	1.02e-08	2.04e-07	3.91e-08	9.28e-08	1.14e-07	4.6e-08	2.72e-07	1.69e-07	1.07e-06	8.04e-08	4.97e-07	7.27e-08	8.59e-08	4.07e-08	2.26e-08	8.82e-08	1.33e-07	6.84e-08	7.14e-08	2.4e-07	indoleamine 2,3-dioxygenase [EC:1.13.11.52]	0.976878	0.442949
K00464	3.29e-06	1.86e-06	1.77e-06	0.000116506	0.000463603	4.26e-05	5.03e-05	1.82e-05	0.000179988	0.000165447	0.000263671	0.000369007	0.000120588	4.27e-06	1.4e-05	8.08e-06	2.88e-05	0.00022278	1.54e-05	3.26e-05	1.29e-05	0.000137784	9.88e-05	0.000134894	0.000237802	0.000134133	all-trans-8'-apo-beta-carotenal 15,15'-oxygenase [EC:1.14.99.41]	0.0171139	0.0246679
K00466	0.00013243	9.81e-05	9.84e-05	0.000104139	8.22e-05	8.04e-05	0.000106918	0.000101345	0.000116705	0.000124779	0.000111243	8.84e-05	0.0001	8.94e-05	6.03e-05	5.8e-05	5.95e-05	8.05e-05	5.54e-05	5.92e-05	5.91e-05	8.04e-05	8.09e-05	9.35e-05	8.24e-05	7.32e-05	tryptophan 2-monooxygenase [EC:1.13.12.3]	0.85816	0.0851082
K00467	3.34e-06	4.08e-06	4.01e-06	3.11e-06	1.78e-06	3.29e-06	3.78e-06	3.88e-06	2.01e-06	2.32e-06	2.31e-06	1.93e-06	2.93e-06	5.08e-06	4.2e-06	5.98e-06	6.09e-06	3.72e-06	4.62e-06	5.68e-06	5.24e-06	4.28e-06	3.97e-06	4.26e-06	4.05e-06	5.05e-06	lactate 2-monooxygenase [EC:1.13.12.4]	0.0180541	0.0775515
K00468	1.3e-07	2e-07	2.72e-07	1.02e-07	2.55e-08	1.77e-07	2.08e-07	2.67e-07	2.9e-08	1.63e-07	1.37e-07	1.18e-07	4.6e-08	9.62e-10	1.06e-07	5.67e-08	3.89e-08	5.96e-09	1.97e-09	2.3e-08	3.31e-08	7.06e-09	4.81e-08	2.86e-08	3.4e-08	9.11e-08	[EC:1.13.12.-]	0.0730417	0.519319
K00469	1.47e-05	1.86e-05	2.37e-05	1.14e-05	9.12e-06	2.13e-05	1.63e-05	1.99e-05	1.5e-05	1.3e-05	6.83e-06	9.63e-06	1.35e-05	1.88e-05	3.21e-05	3e-05	2.25e-05	1.88e-05	3.01e-05	2.54e-05	2.71e-05	2.69e-05	2.85e-05	1.28e-05	1.23e-05	1.76e-05	inositol oxygenase [EC:1.13.99.1]	0.0390726	0.0868188
K00470	5.17e-06	6.22e-06	5.95e-06	3.04e-06	2.91e-06	4.72e-06	5.76e-06	5.59e-06	2.79e-06	3.49e-06	2.7e-06	2.6e-06	3.13e-06	7.32e-06	5.42e-06	8.74e-06	8.8e-06	5.34e-06	6.72e-06	8.18e-06	7.5e-06	5.61e-06	5.51e-06	5.99e-06	5.62e-06	4.49e-06	[EC:1.14.1.-]	0.0204235	0.0737966
K00471	3.12e-05	3.83e-05	3.59e-05	1.73e-05	1.78e-05	2.48e-05	3.46e-05	3.4e-05	1.71e-05	1.82e-05	1.56e-05	1.55e-05	1.81e-05	5.93e-05	3.69e-05	7.01e-05	7.44e-05	4.48e-05	5.39e-05	6.89e-05	6.32e-05	4.66e-05	4.36e-05	4.92e-05	4.7e-05	3.43e-05	gamma-butyrobetaine dioxygenase [EC:1.14.11.1]	0.0309399	0.127375
K00472	2.2e-06	6.58e-07	2.83e-06	6.2e-06	1.85e-05	1.76e-05	6.48e-06	3.74e-06	7.74e-06	7.92e-06	1.24e-05	1.53e-05	6.34e-06	3.29e-06	8.88e-06	4.59e-06	2.55e-06	1.38e-05	4.23e-06	2.86e-06	1.64e-06	9.31e-06	8.92e-06	8.93e-06	1.46e-05	9.76e-06	prolyl 4-hydroxylase [EC:1.14.11.2]	0.0334316	0.0565886
K00476	1.73e-06	1.1e-06	2.14e-06	4.23e-06	6.1e-06	2.71e-06	1.43e-06	1.5e-06	2.43e-06	2.71e-06	4.14e-06	4.91e-06	3.57e-06	2.27e-06	4.17e-06	3.14e-06	1.26e-06	3.45e-06	1.7e-06	1.28e-06	1.1e-06	2.72e-06	3.43e-06	3.06e-06	3.82e-06	5.89e-06	aspartate beta-hydroxylase [EC:1.14.11.16]	0.0704987	0.448246
K00477	8.22e-07	1.75e-07	1.27e-06	3.52e-07	4.19e-07	7.51e-06	2.23e-06	1.38e-06	4.45e-07	8.28e-07	1.07e-06	6.12e-07	3.8e-07	2.16e-06	4.43e-06	2.83e-06	7.59e-07	3.57e-07	2.19e-06	7.3e-07	6.56e-07	6.42e-07	1.99e-06	7.41e-07	3.07e-07	8.81e-07	phytanoyl-CoA hydroxylase [EC:1.14.11.18]	0.957987	0.100039
K00478	9.81e-07	1.7e-06	1.58e-06	2.88e-06	7.72e-06	4.66e-06	2.67e-06	2.75e-06	3.61e-06	3.94e-06	5.58e-06	6.71e-06	3.09e-06	7.74e-07	2.46e-06	9.83e-07	1.56e-06	3.87e-06	2.24e-06	1.61e-06	1.52e-06	2.9e-06	2.95e-06	2.96e-06	3.99e-06	2.76e-06	[EC:1.14.11.-]	0.0186499	0.0265309
K00479	0.000153468	0.000149374	0.000150098	0.000128712	0.000120346	0.00011223	0.000144441	0.000143195	0.000112395	0.000121814	0.000119922	0.00010987	0.000123151	0.000175468	0.000127324	0.00018556	0.000181468	0.000147069	0.000141024	0.000172707	0.000159693	0.000145944	0.000146096	0.00016355	0.000156013	0.000150507	Rieske 2Fe-2S family protein	0.0476791	0.448246
K00480	0.000426088	0.000378516	0.000372257	0.000356985	0.00026776	0.000320125	0.000358172	0.000365665	0.000361394	0.000378329	0.000346241	0.000293921	0.000342984	0.000436993	0.000317082	0.000406967	0.000414298	0.000368299	0.000354931	0.000400893	0.000389766	0.000382287	0.000381297	0.000418364	0.000380879	0.000368081	salicylate hydroxylase [EC:1.14.13.1]	0.12857	0.816069
K00481	0.000302016	0.000173914	0.000181671	0.000278372	0.00017953	0.00016545	0.000207241	0.000191235	0.000285786	0.000311374	0.000286507	0.000210555	0.000258094	0.000281164	0.000181087	0.000183804	0.000188104	0.000240902	0.000167925	0.000188223	0.000183251	0.000240266	0.000245966	0.000292259	0.000254105	0.000246143	p-hydroxybenzoate 3-monooxygenase [EC:1.14.13.2]	0.346574	0.0608692
K00483	0.000209396	2.56e-05	4.22e-05	0.000228137	0.000127063	7.11e-05	8.53e-05	6.73e-05	0.000256149	0.000281432	0.000257138	0.000171685	0.000203448	0.000179625	0.000103667	3.4e-05	4e-05	0.000169462	6.15e-05	5.23e-05	6.06e-05	0.000163291	0.000173341	0.000215103	0.000177554	0.000172872	4-hydroxyphenylacetate-3-monooxygenase large chain [EC:1.14.14.9]	0.0730417	0.0371495
K00484	5.94e-07	2.03e-07	8.22e-07	9.59e-07	4.62e-07	3.83e-06	1.18e-06	1.1e-06	3.16e-07	9.81e-07	8.83e-07	4.42e-07	9.1e-07	1.8e-06	3.37e-06	1.78e-06	4.51e-07	4.46e-07	1.34e-06	5.93e-07	5.25e-07	6.4e-07	1.73e-06	9.11e-07	4.72e-07	1.55e-06	4-hydroxyphenylacetate-3-monooxygenase small chain [EC:1.14.14.9]	0.958235	0.356856
K00485	8.11e-05	0.000100958	9.4e-05	5.74e-05	5.75e-05	6.53e-05	9.12e-05	9.28e-05	4.8e-05	5e-05	4.46e-05	4.47e-05	5.68e-05	7.23e-05	4.74e-05	8.45e-05	8.83e-05	5.54e-05	6.63e-05	8.3e-05	7.55e-05	5.8e-05	5.53e-05	6.13e-05	5.86e-05	4.87e-05	dimethylaniline monooxygenase (N-oxide forming) [EC:1.14.13.8]	0.0192648	0.17125
K00486	0.000206543	0.000337397	0.000312957	0.000145158	0.000110294	0.000317412	0.000234423	0.000301582	0.000196594	0.00015215	0.000110467	0.000150955	0.000163812	0.000177157	0.00030857	0.000266045	0.000259448	0.000151378	0.000296012	0.000255868	0.000284929	0.000207589	0.000204214	0.000126793	0.00011556	0.000151926	kynurenine 3-monooxygenase [EC:1.14.13.9]	0.0324555	0.0243242
K00491	3.99e-09	1.69e-08	1.65e-08	7.88e-08	1.69e-08	3.32e-09	3.07e-08	3.73e-08	2.18e-08	3.47e-08	7.76e-08	3.59e-08	4.93e-08	5.61e-09	3.58e-07	5.66e-09	1.22e-07	4.97e-08	6.8e-09	2.78e-08	1.42e-08	1.29e-07	1.14e-07	8.5e-08	1.88e-07	4.28e-07	nitric-oxide synthase, bacterial [EC:1.14.13.39]	0.36764	0.496983
K00492	0.000335587	0.000232238	0.000245845	0.000304147	0.000198336	0.000253823	0.000269265	0.000255013	0.000281963	0.000317587	0.000297041	0.000220502	0.000287683	0.000392184	0.000296071	0.000338498	0.000329275	0.00030741	0.00028142	0.000318873	0.000302385	0.000313658	0.000328099	0.000367693	0.000324492	0.00032092	[EC:1.14.13.-]	0.863109	0.930916
K00493	0.000105825	0.000138335	0.000125558	6.34e-05	6.68e-05	7.67e-05	0.000116821	0.000115172	6.1e-05	6.49e-05	5.82e-05	5.92e-05	6.63e-05	0.000104574	6.23e-05	0.000124138	0.00013319	8.65e-05	9.7e-05	0.000125757	0.000114062	8.74e-05	8.14e-05	9.42e-05	9.11e-05	7.04e-05	unspecific monooxygenase [EC:1.14.14.1]	0.0309399	0.181607
K00494	1.26e-08	7.62e-09	8.32e-08	9.03e-09	2.49e-08	4.67e-09	1.4e-08	7.46e-08	5.59e-09	1.47e-09	4.08e-09	1.44e-08	4.08e-09	1.39e-07	6.76e-07	7.15e-09	9.1e-09	7.18e-09	2.29e-08	5.39e-09	3e-08	1.03e-08	2.83e-08	5.1e-10	1.22e-08	1.77e-08	alkanal monooxygenase alpha chain [EC:1.14.14.3]	0.263547	0.550923
K00495	2.95e-06	3.04e-06	3.62e-06	2.47e-06	1.93e-06	4.37e-06	3.32e-06	3.82e-06	1.43e-06	1.61e-06	1.85e-06	1.47e-06	2.38e-06	5.28e-06	6.66e-06	6.75e-06	5.61e-06	3.54e-06	4.78e-06	5.17e-06	4.81e-06	3.61e-06	3.84e-06	4.18e-06	3.76e-06	4.99e-06	[EC:1.14.14.-]	0.0590527	0.0108391
K00496	0.000139463	0.000199863	0.000156269	6.91e-05	6.62e-05	0.000122449	0.000152573	0.000160597	7.61e-05	6.82e-05	6.43e-05	6.42e-05	7.26e-05	0.000141967	0.000101363	0.000168591	0.000172219	0.00010453	0.000145368	0.000179907	0.000169808	0.000112515	0.000102748	0.00012047	0.000109197	9.52e-05	alkane 1-monooxygenase [EC:1.14.15.3]	0.0264229	0.181607
K00499	4.04e-06	1.67e-06	5.37e-06	6.83e-06	1.8e-06	2.92e-05	9.34e-06	5.51e-06	2.81e-06	5.57e-06	5e-06	3.03e-06	1.03e-05	8.76e-06	1.55e-05	8.93e-06	2.7e-06	2.17e-06	7.53e-06	3.18e-06	3.15e-06	3.75e-06	1.01e-05	3.46e-06	1.54e-06	9.38e-06	choline monooxygenase [EC:1.14.15.7]	0.92204	0.561699
K00500	0.000165429	0.000253604	0.000297928	0.000145446	0.000101147	0.000293273	0.000183991	0.000261954	0.000189827	0.000160465	0.000102154	0.000140026	0.000167764	0.000183772	0.000256448	0.000283502	0.000271966	0.000162786	0.00029119	0.000233613	0.000273473	0.000224336	0.000230128	0.00012816	0.000117338	0.000143405	phenylalanine-4-hydroxylase [EC:1.14.16.1]	0.0730417	0.0335773
K00505	8.81e-06	8.68e-06	1.03e-05	6.69e-06	6.58e-06	1.06e-05	8.83e-06	8.95e-06	7.03e-06	7.13e-06	5.78e-06	6.34e-06	6.81e-06	1.23e-05	1.25e-05	1.56e-05	1.17e-05	1.07e-05	1.31e-05	1.28e-05	1.21e-05	1.37e-05	1.41e-05	9.33e-06	9.59e-06	1.14e-05	tyrosinase [EC:1.14.18.1]	0.0606662	0.155269
K00507	7.14e-05	9.24e-05	0.000121248	0.000157819	0.000259348	0.000189586	0.000150326	0.000119756	0.000150897	0.00014039	0.000170481	0.000226598	0.00016126	8.17e-05	0.000138804	9.79e-05	0.000108312	0.000168833	0.000168987	0.00011176	0.000123647	0.000144349	0.000146124	0.00011868	0.000166077	0.000162531	stearoyl-CoA desaturase (delta-9 desaturase) [EC:1.14.19.1]	0.0747107	0.131377
K00508	0.00020139	0.000347108	0.000272731	0.00012904	8.76e-05	0.000317148	0.000260114	0.000290792	0.000159651	0.000125396	9.29e-05	0.000126236	0.000144648	0.000156701	0.000473687	0.000219665	0.000237353	0.000115564	0.000283597	0.00025305	0.000256967	0.000159514	0.000170422	0.000102567	8.98e-05	0.000143463	linoleoyl-CoA desaturase [EC:1.14.19.3]	0.0231784	0.0309004
K00510	2.34e-06	9.62e-07	1.1e-06	7.33e-05	0.000290003	2.56e-05	3.08e-05	1.14e-05	0.000112547	0.000104975	0.000166323	0.000231301	7.56e-05	2.08e-06	7.19e-06	4.59e-06	1.79e-05	0.000137848	8.88e-06	2e-05	7.92e-06	8.52e-05	6.15e-05	8.35e-05	0.000147273	8.29e-05	heme oxygenase [EC:1.14.99.3]	0.0171139	0.0184401
K00511	2.11e-06	5.97e-06	1.06e-06	1.34e-06	7.52e-07	8.33e-06	8.97e-06	3.69e-06	2.33e-07	1.38e-06	4.28e-07	1.39e-06	1.65e-06	2.19e-06	4.04e-05	6.72e-07	6.59e-06	4.24e-07	7.42e-06	6.66e-06	2.91e-06	1.65e-07	2.81e-06	4.21e-07	3.98e-07	1.54e-06	squalene monooxygenase [EC:1.14.13.132]	0.165965	0.0655658
K00514	4.38e-06	2.43e-06	3.36e-06	0.000130264	0.000513204	4.59e-05	5.5e-05	2.04e-05	0.000199064	0.000182982	0.000291556	0.000408354	0.000134317	4.9e-06	1.41e-05	9.96e-06	3.1e-05	0.000239573	1.6e-05	3.51e-05	1.4e-05	0.000148417	0.000106557	0.000145641	0.000255941	0.000146445	zeta-carotene desaturase [EC:1.3.5.6]	0.0171139	0.0272965
K00517	0.000325235	0.000350436	0.000350691	0.000321139	0.000361536	0.00032458	0.000358328	0.000334351	0.000299865	0.000321165	0.000334898	0.000338871	0.000317269	0.000283269	0.000299089	0.000301588	0.000304171	0.000328873	0.000274808	0.000295434	0.000274855	0.000306509	0.000305603	0.000318332	0.000338563	0.000310575	[EC:1.14.-.-]	0.651151	0.0580741
K00518	9.91e-07	7.96e-07	9.84e-07	3.12e-05	0.000120009	1.1e-05	1.32e-05	5.19e-06	4.66e-05	4.3e-05	6.87e-05	9.58e-05	3.24e-05	8.58e-07	3.13e-06	1.87e-06	6.96e-06	5.38e-05	3.44e-06	7.79e-06	3.1e-06	3.34e-05	2.36e-05	3.26e-05	5.75e-05	3.41e-05	superoxide dismutase [EC:1.15.1.1]	0.0171139	0.0251615
K00520	0.000749207	0.000631821	0.000555173	0.00065621	0.000483844	0.000523509	0.000627713	0.00060072	0.000673208	0.000681523	0.000660049	0.000538993	0.000625256	0.000642052	0.000463156	0.000483372	0.000478195	0.000570813	0.000529166	0.000540087	0.000560377	0.000571095	0.000571449	0.000661113	0.00059006	0.000607103	mercuric reductase [EC:1.16.1.1]	0.99084	0.0190735
K00523	1.81e-05	1.62e-05	2.2e-05	3.8e-05	9.94e-06	4.91e-05	2.64e-05	2.73e-05	1.07e-05	1.31e-05	2.15e-05	1.58e-05	4.59e-05	2.96e-05	3.5e-05	3e-05	2.19e-05	1.36e-05	2.46e-05	2.16e-05	2.24e-05	1.61e-05	2.46e-05	1.83e-05	1.51e-05	3.4e-05	CDP-4-dehydro-6-deoxyglucose reductase [EC:1.17.1.1]	0.443683	0.145512
K00524	4.46e-06	2.17e-06	2.36e-06	0.000189988	0.000762331	6.68e-05	8.1e-05	2.87e-05	0.000295775	0.000271302	0.000432326	0.000606763	0.000196895	5.44e-06	1.77e-05	1.21e-05	4.61e-05	0.000360962	2.31e-05	5.22e-05	2.03e-05	0.000223439	0.000158828	0.000218758	0.000386023	0.0002159	ribonucleotide reductase, class II [EC:1.17.4.1]	0.0171139	0.0184401
K00525	0.0020352	0.00188395	0.00185465	0.00195012	0.00120032	0.00173148	0.00186078	0.00186683	0.00177994	0.00180134	0.00165162	0.00139283	0.00191975	0.00192165	0.0016853	0.00173481	0.00169271	0.00158112	0.00184575	0.0017624	0.00184472	0.00170232	0.00176283	0.00177245	0.00156275	0.00178655	ribonucleoside-diphosphate reductase alpha chain [EC:1.17.4.1]	0.106323	0.867993
K00526	0.000171342	0.000231099	0.000256911	0.00022515	9.8e-05	0.000271041	0.000209714	0.000240881	0.00013632	0.000123628	0.000121195	0.000119703	0.000240524	0.000197166	0.00030447	0.000262973	0.000217927	0.000143912	0.00027085	0.000218381	0.000244752	0.000180337	0.000199728	0.000136149	0.000118937	0.000210696	ribonucleoside-diphosphate reductase beta chain [EC:1.17.4.1]	0.0783274	0.0243242
K00527	4.55e-05	5.3e-05	7.36e-05	8.74e-05	2.63e-05	9.98e-05	0.000102289	6.64e-05	2.94e-05	3.36e-05	3.04e-05	2.6e-05	8.11e-05	8.46e-05	9.01e-05	8.76e-05	7.84e-05	5.16e-05	0.000153138	9.69e-05	0.000112114	5.99e-05	7.86e-05	5.44e-05	4.84e-05	9.43e-05	ribonucleoside-triphosphate reductase [EC:1.17.4.2]	0.101629	0.209536
K00528	0.000254942	0.000214049	0.000207795	0.00020883	0.000150773	0.000194092	0.000214595	0.000210364	0.000200921	0.000218522	0.000205561	0.000162754	0.000199802	0.000242655	0.00018111	0.000213442	0.000203206	0.000195569	0.000178895	0.00020596	0.00019832	0.000198804	0.000206351	0.000228363	0.000203926	0.000206291	ferredoxin--NADP+ reductase [EC:1.18.1.2]	0.177949	0.782685
K00529	0.000614096	0.000311297	0.000348748	0.000584675	0.000365043	0.000334389	0.000406075	0.000367282	0.000606893	0.00066204	0.000601408	0.000436719	0.000541899	0.00060607	0.000393784	0.000394731	0.000388184	0.000521369	0.000378897	0.000400747	0.000401648	0.000527864	0.000549534	0.000617338	0.000534448	0.000530262	ferredoxin--NAD+ reductase [EC:1.18.1.3]	0.243849	0.0431938
K00531	2.09e-06	2.56e-06	2.36e-06	1.09e-06	1.11e-06	1.54e-06	2.19e-06	2.19e-06	1.11e-06	1.2e-06	1.09e-06	9.85e-07	1.16e-06	3.86e-06	2.18e-06	4.45e-06	4.69e-06	2.91e-06	3.47e-06	4.49e-06	4.13e-06	2.94e-06	2.85e-06	3.22e-06	3.01e-06	2.17e-06	nitrogenase [EC:1.18.6.1]	0.0527414	0.137092
K00532	8.91e-09	1.58e-08	1.13e-08	1.83e-08	3.12e-08	3.05e-09	1.18e-08	7.7e-08	5.46e-09	1.85e-08	1.29e-08	9.85e-09	5.65e-09	8.73e-08	8.81e-07	6.02e-09	4.99e-08	1.36e-08	6.18e-08	5.14e-08	5.41e-08	4.57e-08	4.15e-08	2.67e-08	1.65e-08	2.58e-08	ferredoxin hydrogenase [EC:1.12.7.2]	0.968891	0.209536
K00533	3.29e-11	6.68e-09	1.33e-08	9.56e-08	2.17e-08	2.92e-09	5.87e-08	9.12e-08	1.86e-08	9.71e-08	9.46e-08	3.6e-08	7.34e-08	2.29e-08	6.6e-07	1.62e-07	1.89e-07	1.59e-08	1.22e-07	1.05e-07	1.72e-08	1.88e-08	8.48e-08	5.68e-08	2.06e-08	1.37e-07	ferredoxin hydrogenase large subunit [EC:1.12.7.2]	0.3079	0.0608692
K00534	2.34e-05	2.88e-05	2.65e-05	1.32e-05	1.27e-05	1.79e-05	2.5e-05	2.46e-05	1.27e-05	1.4e-05	1.2e-05	1.13e-05	1.44e-05	3.91e-05	2.12e-05	4.47e-05	4.74e-05	2.95e-05	3.51e-05	4.53e-05	4.18e-05	3.03e-05	2.98e-05	3.28e-05	3.07e-05	2.35e-05	ferredoxin hydrogenase small subunit [EC:1.12.7.2]	0.0204945	0.17125
K00535	2e-07	9.77e-08	1.14e-07	8.61e-06	3.46e-05	3.06e-06	3.67e-06	1.36e-06	1.34e-05	1.23e-05	1.96e-05	2.75e-05	8.92e-06	3.42e-07	1.46e-06	7.5e-07	2.89e-06	2.27e-05	1.48e-06	3.31e-06	1.3e-06	1.4e-05	1.01e-05	1.37e-05	2.42e-05	1.35e-05	[EC:1.18.-.-]	0.0171139	0.0246679
K00537	0.000257058	0.000291844	0.000289947	0.000266423	0.000227491	0.000291017	0.000263865	0.000290862	0.000257716	0.000243135	0.000239223	0.000248112	0.000276188	0.00025809	0.000277285	0.000278955	0.000280258	0.000239725	0.000289988	0.000275451	0.000286391	0.000258396	0.000257408	0.000236814	0.000231742	0.000249871	arsenate reductase [EC:1.20.4.1]	0.0356609	0.0361475
K00539	7.4e-08	1.52e-08	9.56e-08	1.52e-08	5.1e-08	5.82e-07	1.64e-07	8.94e-08	3.76e-08	7.15e-08	8.92e-08	4.76e-08	2.49e-08	8.29e-08	1.42e-07	9.04e-08	1.78e-08	1.3e-08	6.61e-08	2.23e-08	2.28e-08	2.51e-08	7.38e-08	2.78e-08	1.13e-08	2.75e-08	[EC:1.97.1.-]	0.928786	0.315855
K00540	0.0029465	0.00348217	0.00357254	0.00275226	0.00288658	0.00351169	0.0031431	0.00339145	0.00294082	0.00283156	0.00271845	0.00291542	0.0028541	0.00297038	0.0033597	0.00349077	0.00342171	0.00295601	0.00332695	0.00326878	0.0033325	0.00311021	0.00312695	0.0028562	0.00283271	0.00289829	[EC:1.-.-.-]	0.0452279	0.0135711
K00543	1.62e-07	4.6e-08	1.83e-07	7.95e-08	6.74e-08	1.12e-06	3.09e-07	1.88e-07	1.02e-07	2.41e-07	2.12e-07	1.14e-07	9.2e-08	5.8e-07	9.8e-07	5.05e-07	7.51e-08	9.79e-08	5.01e-07	1.55e-07	1.73e-07	1.94e-07	6.19e-07	2.01e-07	8.47e-08	2.26e-07	acetylserotonin N-methyltransferase [EC:2.1.1.4]	0.957987	0.598415
K00544	1.8e-07	0	5.79e-08	6.15e-06	6.07e-06	2.4e-07	6.96e-07	2.79e-06	1.5e-06	8.7e-07	6.16e-07	9.64e-07	4.07e-06	9.39e-07	3.84e-07	6.34e-08	1.72e-07	3.99e-07	2.7e-07	2.14e-07	4.96e-08	7.53e-07	9.64e-07	3.45e-07	3.51e-07	7.81e-07	betaine-homocysteine S-methyltransferase [EC:2.1.1.5]	0.181645	0.19717
K00545	6.63e-10	0	2.4e-09	1.22e-08	0	0	3.01e-09	2.32e-08	1.81e-09	4.9e-08	1.57e-08	4.02e-09	4.51e-09	0	2.17e-08	0	0	0	0	6.88e-09	1.77e-09	0	2.91e-09	9.13e-10	8.03e-10	1.21e-08	catechol O-methyltransferase [EC:2.1.1.6]	0.507838	0.933513
K00547	0.000150226	0.000127168	0.000120313	0.0001342	0.00013671	9.71e-05	0.000131664	0.000122887	0.000141466	0.000151993	0.000147783	0.00013151	0.000127839	0.000101017	6.75e-05	6.97e-05	7.92e-05	0.000116722	6.75e-05	7.9e-05	7.23e-05	0.000105891	0.000102375	0.000123669	0.000123864	0.000102279	homocysteine S-methyltransferase [EC:2.1.1.10]	0.195591	0.017298
K00548	0.00153449	0.00158351	0.00155875	0.00170175	0.00201267	0.00149211	0.00163527	0.00153553	0.00168536	0.00165346	0.00179682	0.00189637	0.00172525	0.00151704	0.00148189	0.00155325	0.00151051	0.00175341	0.00155818	0.00156213	0.00155114	0.0016454	0.00159796	0.00165126	0.00174604	0.00168469	5-methyltetrahydrofolate--homocysteine methyltransferase [EC:2.1.1.13]	0.0590527	0.0108391
K00549	0.000325167	0.000238824	0.000268393	0.000363639	0.000277273	0.000314316	0.000286097	0.000284274	0.00033812	0.000360793	0.000356228	0.000305866	0.000368579	0.000331878	0.000313978	0.000287327	0.000278705	0.000322661	0.000279996	0.000275591	0.000276688	0.000332261	0.000345128	0.000336976	0.00032262	0.000329562	5-methyltetrahydropteroyltriglutamate--homocysteine methyltransferase [EC:2.1.1.14]	0.216519	0.0541376
K00551	2.37e-06	1.58e-06	2.77e-06	5.86e-06	1.09e-06	1.9e-06	9.29e-07	1.57e-06	6.57e-07	1.17e-06	2.16e-06	1.2e-06	4.89e-06	2.51e-06	4.92e-06	3.36e-06	9.03e-07	1.3e-06	1.48e-06	1.28e-06	1.05e-06	1.71e-06	2.97e-06	2.6e-06	1.74e-06	8.09e-06	phosphatidylethanolamine N-methyltransferase [EC:2.1.1.17]	0.50482	0.87208
K00554	0.000289443	0.000282931	0.000292076	0.000341033	0.000377789	0.00029754	0.000296379	0.000295412	0.000335471	0.000331261	0.000348002	0.00036864	0.000342917	0.000289713	0.000312953	0.000283272	0.000289369	0.000326471	0.00030224	0.000289697	0.000293106	0.000316367	0.000312434	0.000306565	0.000325291	0.000318097	tRNA (guanine37-N1)-methyltransferase [EC:2.1.1.228]	0.0189877	0.0389905
K00555	3.64e-07	1.78e-07	1.92e-07	1.57e-05	6.3e-05	5.5e-06	6.69e-06	2.38e-06	2.44e-05	2.24e-05	3.57e-05	5.01e-05	1.63e-05	6.27e-07	2.07e-06	1.4e-06	5.4e-06	4.24e-05	2.7e-06	6.1e-06	2.37e-06	2.61e-05	1.86e-05	2.56e-05	4.52e-05	2.53e-05	tRNA (guanine26-N2/guanine27-N2)-dimethyltransferase [EC:2.1.1.215 2.1.1.216]	0.0171139	0.0184401
K00556	8.88e-05	0.000147568	0.000164616	0.000126193	0.000248011	0.000170474	0.000123825	0.000150819	0.000174155	0.000153112	0.000161737	0.00022913	0.000141129	0.000100096	0.000169379	0.000156749	0.00016156	0.000173479	0.000169165	0.000145756	0.000152863	0.000173162	0.000159043	0.000118159	0.000155273	0.000129946	tRNA (guanosine-2'-O-)-methyltransferase [EC:2.1.1.34]	0.228274	0.85719
K00557	1.38e-06	3.42e-07	2.19e-06	9.6e-07	2.64e-06	9.32e-06	3.28e-06	5.41e-06	7.27e-07	2.12e-06	1.47e-06	9.69e-07	8.42e-07	5.14e-06	1.46e-05	4.71e-06	2.22e-06	1.16e-06	3.85e-06	1.64e-06	1.53e-06	1.34e-06	3.6e-06	1.51e-06	1.14e-06	3.04e-06	tRNA (uracil-5-)-methyltransferase [EC:2.1.1.35]	0.968891	0.0554371
K00558	0.00084023	0.00067124	0.000608561	0.000802634	0.000634939	0.000607058	0.000662581	0.000643313	0.000850731	0.000860348	0.000826197	0.000705396	0.000780396	0.000800298	0.000652704	0.000617654	0.000576576	0.00073363	0.000645131	0.000641735	0.000651547	0.000735632	0.000734285	0.000796664	0.000723493	0.000757997	DNA (cytosine-5-)-methyltransferase [EC:2.1.1.37]	0.417024	0.0361475
K00560	0.000263488	0.000301481	0.000296136	0.000257093	0.000143437	0.000305286	0.000268033	0.000296696	0.000229368	0.000212038	0.000193864	0.000184122	0.000263821	0.000247307	0.00027761	0.000266092	0.00024907	0.000191567	0.000294464	0.000258298	0.000281497	0.000227471	0.000235636	0.00019969	0.000177898	0.000237469	thymidylate synthase [EC:2.1.1.45]	0.039974	0.0319227
K00561	4.73e-09	1.41e-08	2.07e-09	5.41e-09	9.97e-09	2.58e-09	2.12e-09	8.59e-09	3.68e-09	1.62e-08	8.22e-09	3.84e-09	6.05e-09	4.15e-08	1.33e-07	3.35e-09	5.69e-08	7.54e-09	9.91e-09	1.34e-08	9e-09	2.15e-08	5.24e-08	1.47e-08	1.15e-08	2.48e-08	23S rRNA (adenine2085-N6)-dimethyltransferase [EC:2.1.1.184]	0.321984	0.722729
K00563	5.85e-06	7.09e-06	5.71e-06	6.55e-06	6.58e-06	1.61e-05	1.11e-05	1.01e-05	3.96e-06	7.41e-06	6.86e-06	6.28e-06	6.27e-06	7.62e-06	4.44e-05	7.53e-06	8.64e-06	4.52e-06	1.17e-05	8.92e-06	6.17e-06	5.44e-06	9.07e-06	3.66e-06	4.11e-06	8.44e-06	23S rRNA (guanine745-N1)-methyltransferase [EC:2.1.1.187]	0.953066	0.0932776
K00564	0.00014403	0.000178814	0.000178464	0.000112681	8.3e-05	0.000150418	0.000156527	0.000172701	8.75e-05	9.31e-05	8.7e-05	8.63e-05	0.000117006	0.000155514	0.000142036	0.0001883	0.000191467	0.000111465	0.000155467	0.000175478	0.000168501	0.00012339	0.000123637	0.000121897	0.000116255	0.000118529	16S rRNA (guanine1207-N2)-methyltransferase [EC:2.1.1.172]	0.0183363	0.0135912
K00566	0.000519568	0.00053145	0.000529903	0.000612855	0.000655464	0.000540122	0.000525737	0.000549109	0.000594847	0.00057395	0.00061554	0.000654907	0.00062597	0.000502133	0.000554177	0.000497524	0.000508868	0.000563511	0.000530799	0.000512284	0.000526528	0.000552505	0.00054041	0.000529095	0.000561296	0.000562928	tRNA-specific 2-thiouridylase [EC:2.8.1.-]	0.0235099	0.0812138
K00567	0.000239295	0.000179642	0.000184616	0.000222612	0.000142544	0.000187237	0.000178295	0.000186804	0.000231905	0.000242363	0.000219527	0.000173746	0.000213652	0.00023429	0.000212584	0.000192942	0.000182079	0.000200761	0.000186539	0.000184695	0.000190297	0.000213349	0.000221584	0.000226959	0.000197462	0.000214053	methylated-DNA-[protein]-cysteine S-methyltransferase [EC:2.1.1.63]	0.810909	0.142406
K00568	0.000291395	0.000245654	0.000254366	0.000274212	0.000181687	0.000212926	0.0002491	0.000248748	0.0002242	0.000240763	0.000234992	0.000191797	0.000271084	0.000290385	0.00025755	0.00026378	0.000253194	0.00023158	0.000213516	0.000246962	0.000235026	0.000236399	0.000242248	0.000264549	0.000240285	0.000259704	2-polyprenyl-6-hydroxyphenyl methylase / 3-demethylubiquinone-9 3-methyltransferase [EC:2.1.1.222 2.1.1.64]	0.144726	0.593067
K00569	3.21e-05	5.15e-05	3.92e-05	2.31e-05	1.57e-05	4.97e-05	3.72e-05	4.33e-05	2.34e-05	1.72e-05	1.76e-05	1.85e-05	2.71e-05	2.47e-05	4.62e-05	3.25e-05	2.57e-05	1.75e-05	3.43e-05	2.97e-05	3.32e-05	2.24e-05	2.3e-05	1.79e-05	1.42e-05	2.58e-05	thiopurine S-methyltransferase [EC:2.1.1.67]	0.0293651	0.0389905
K00570	3.44e-05	4.3e-05	3.92e-05	2.07e-05	1.91e-05	2.39e-05	3.7e-05	3.7e-05	1.89e-05	2.02e-05	1.8e-05	1.69e-05	2.16e-05	5.5e-05	3.19e-05	6.35e-05	6.85e-05	4.22e-05	4.96e-05	6.47e-05	5.96e-05	4.34e-05	4.1e-05	4.69e-05	4.4e-05	3.34e-05	phosphatidyl-N-methylethanolamine N-methyltransferase [EC:2.1.1.71]	0.0186499	0.181607
K00571	8.82e-05	0.000120545	0.000130892	8.35e-05	8.56e-05	0.000119269	0.000101853	0.00010114	6.92e-05	7.61e-05	6.75e-05	8.09e-05	9.54e-05	9.77e-05	0.000183937	0.000131302	0.000104239	8.17e-05	0.000107703	0.000106492	8.87e-05	8.04e-05	8.93e-05	6.14e-05	7.24e-05	9.17e-05	site-specific DNA-methyltransferase (adenine-specific) [EC:2.1.1.72]	0.0270661	0.00878357
K00573	0.000452609	0.000378281	0.00038493	0.000439524	0.000302027	0.000368592	0.000379715	0.000389055	0.000410988	0.000427402	0.000406339	0.000342706	0.000436006	0.000443851	0.000383354	0.00038996	0.000387678	0.000379149	0.000361504	0.000382186	0.0003793	0.000395624	0.00040667	0.000425857	0.000384332	0.000409616	protein-L-isoaspartate(D-aspartate) O-methyltransferase [EC:2.1.1.77]	0.998014	0.561699
K00574	0.000564252	0.000281657	0.000324293	0.00062976	0.000445443	0.00037184	0.000431557	0.00035867	0.000586772	0.00064097	0.000612228	0.000471983	0.000577163	0.000557655	0.00037174	0.000339672	0.000342677	0.000502297	0.00038549	0.000364954	0.000371246	0.000485065	0.000514322	0.000588075	0.000526686	0.000539975	cyclopropane-fatty-acyl-phospholipid synthase [EC:2.1.1.79]	0.115691	0.0243242
K00575	0.000278529	0.000370838	0.000340544	0.000187822	0.000168212	0.000318487	0.000313761	0.000342617	0.000188555	0.00017998	0.000163088	0.000171771	0.000201382	0.000313445	0.000273469	0.000378554	0.000393971	0.000238975	0.000332445	0.000377342	0.000367253	0.000264703	0.000261473	0.000258394	0.000244339	0.000244861	chemotaxis protein methyltransferase CheR [EC:2.1.1.80]	0.0214166	0.014218
K00577	2.34e-07	1.05e-07	1.55e-07	5.23e-06	2.02e-05	1.8e-06	2.16e-06	8.26e-07	7.83e-06	7.25e-06	1.16e-05	1.6e-05	5.34e-06	2.68e-07	6.77e-07	4.37e-07	1.3e-06	1e-05	7.02e-07	1.51e-06	6.04e-07	6.23e-06	4.69e-06	6.22e-06	1.07e-05	6.34e-06	tetrahydromethanopterin S-methyltransferase subunit A [EC:2.1.1.86]	0.0171139	0.0251615
K00580	4.13e-08	7.19e-09	6.32e-08	6.81e-09	1.52e-08	3.84e-07	1.12e-07	5.62e-08	2.1e-08	3.72e-08	5.2e-08	3.13e-08	1.11e-08	6.41e-08	1.14e-07	7.39e-08	1.5e-08	1.01e-08	5.24e-08	1.92e-08	1.83e-08	2.08e-08	6.79e-08	2.19e-08	9.09e-09	3.06e-08	tetrahydromethanopterin S-methyltransferase subunit D [EC:2.1.1.86]	0.863109	0.311444
K00584	1.01e-10	7.64e-10	8.51e-11	2.62e-10	0	4.12e-10	0	2.67e-10	1.03e-10	1e-10	5.54e-10	1.07e-10	1.32e-10	7.63e-10	2.99e-09	5.42e-10	0	0	1.06e-09	7.48e-09	2.06e-10	0	1.75e-09	0	0	0	tetrahydromethanopterin S-methyltransferase subunit H [EC:2.1.1.86]	0.963021	0.0939217
K00586	3.88e-09	5.22e-10	6.98e-09	4.12e-09	6.52e-09	3.48e-08	1.11e-08	1.41e-08	1.92e-09	1.83e-09	4.78e-09	2.95e-09	3.22e-09	1.36e-08	6.28e-08	2.23e-08	8.1e-09	6.55e-09	1.59e-08	5.24e-09	4.53e-09	2.07e-09	5.49e-09	4.95e-09	4.32e-09	1.98e-08	diphthine synthase [EC:2.1.1.98]	0.875507	0.155269
K00587	3.37e-07	3.76e-08	7.01e-07	2.93e-08	1.6e-07	4.31e-06	1.23e-06	6.24e-07	2.13e-07	3.86e-07	4.82e-07	2.96e-07	4.43e-08	4.93e-07	1.03e-06	8.32e-07	1.88e-07	2.46e-07	6.45e-07	2.06e-07	9.22e-08	3.36e-07	8.51e-07	1.2e-07	1.97e-07	4.79e-08	protein-S-isoprenylcysteine O-methyltransferase [EC:2.1.1.100]	0.90205	0.194332
K00588	5.95e-05	9.6e-05	9.96e-05	4.9e-05	4.11e-05	9.69e-05	6.61e-05	9.22e-05	6.44e-05	5.23e-05	3.6e-05	5.21e-05	5.49e-05	5.79e-05	8.57e-05	8.78e-05	8.54e-05	5.34e-05	9.54e-05	7.97e-05	8.89e-05	7.24e-05	7.1e-05	4.03e-05	4.19e-05	5.08e-05	caffeoyl-CoA O-methyltransferase [EC:2.1.1.104]	0.0381699	0.0319227
K00590	5.73e-07	2.94e-07	7.78e-07	8.61e-07	9.32e-07	2.84e-06	9.79e-07	7.83e-07	4.68e-07	6.81e-07	1.02e-06	8.59e-07	7.4e-07	6.82e-07	1.76e-06	1.01e-06	3.14e-07	7.63e-07	7.3e-07	3.74e-07	2.7e-07	5.87e-07	1.01e-06	7.43e-07	7.69e-07	1.13e-06	site-specific DNA-methyltransferase (cytosine-N4-specific) [EC:2.1.1.113]	0.644401	0.867993
K00594	1.95e-06	1.18e-06	1.73e-06	4.54e-06	2.16e-06	2.22e-06	1.47e-06	1.85e-06	1.45e-06	4.49e-06	5.79e-06	3.44e-06	4.13e-06	1.5e-07	1.17e-06	5.19e-07	2.54e-07	1.34e-07	2.64e-07	1.48e-07	1.81e-07	7.22e-07	1.42e-06	3.82e-07	5.23e-07	4.82e-06	xylitol oxidase [EC:1.1.3.41]	0.153573	0.78849
K00595	0.00021872	0.000204771	0.000198749	0.000263957	0.000521871	0.000179381	0.000233588	0.000202771	0.000310519	0.000311911	0.000380127	0.000443094	0.000262387	0.00021649	0.000150695	0.000211455	0.000225906	0.000354153	0.000176165	0.000223281	0.000195054	0.000286571	0.000253806	0.000309091	0.000374128	0.000280402	precorrin-6Y C5,15-methyltransferase / precorrin-8W decarboxylase [EC:2.1.1.132 1.-.-.-]	0.0320055	0.0213017
K00596	3.69e-05	1.25e-05	1.48e-05	3.74e-05	2.22e-05	2.15e-05	2.11e-05	1.77e-05	4.06e-05	4.46e-05	4.13e-05	2.84e-05	3.38e-05	3.35e-05	2.33e-05	1.42e-05	1.42e-05	2.95e-05	1.65e-05	1.55e-05	1.6e-05	2.92e-05	3.13e-05	3.73e-05	3.11e-05	3.14e-05	2,2-dialkylglycine decarboxylase (pyruvate) [EC:4.1.1.64]	0.0668754	0.0290757
K00598	3.61e-05	4.17e-05	4.55e-05	5.45e-05	0.000110445	4.85e-05	4.66e-05	4.4e-05	5.65e-05	5.67e-05	7.34e-05	9.17e-05	5.52e-05	3.83e-05	4.58e-05	5.04e-05	4.83e-05	6.91e-05	4e-05	4.51e-05	4.18e-05	5.6e-05	5.37e-05	5.65e-05	7.17e-05	6.38e-05	trans-aconitate 2-methyltransferase [EC:2.1.1.144]	0.0183775	0.0594608
K00599	0.000376188	0.000449693	0.000456631	0.000496329	0.000634452	0.000508067	0.000416491	0.000443244	0.000476032	0.000456027	0.000512333	0.000592364	0.000496263	0.000366516	0.000678755	0.000457513	0.000401117	0.000539984	0.000470278	0.000415653	0.000414906	0.000507379	0.000509218	0.000439892	0.000518656	0.000583951	[EC:2.1.1.-]	0.120845	0.442949
K00600	0.000737235	0.000783726	0.000766574	0.000748236	0.00077543	0.000733143	0.000760706	0.000770854	0.000734062	0.000725458	0.00073957	0.000765592	0.000758664	0.00068761	0.000727579	0.00069911	0.00070849	0.000707186	0.000710889	0.000708043	0.000710796	0.000701562	0.000694425	0.000689953	0.000707138	0.000699264	glycine hydroxymethyltransferase [EC:2.1.2.1]	0.54111	0.255192
K00602	0.000683395	0.000649101	0.000662738	0.000816746	0.000880234	0.000694993	0.000690089	0.000681696	0.000806018	0.000790035	0.000836615	0.000869811	0.000819419	0.000671385	0.000710068	0.000630696	0.000647482	0.000759506	0.000696647	0.000657738	0.000672731	0.000735527	0.000722848	0.000725052	0.000759045	0.00075182	phosphoribosylaminoimidazolecarboxamide formyltransferase / IMP cyclohydrolase [EC:2.1.2.3 3.5.4.10]	0.0183363	0.0135912
K00603	1.93e-05	3.24e-05	1.7e-05	6.88e-06	4.18e-06	1.77e-05	1.88e-05	2.27e-05	9.92e-06	4.04e-06	6.46e-06	6.55e-06	6.52e-06	7.37e-06	9e-06	8.9e-06	5.61e-06	2.91e-06	1.23e-05	1.37e-05	1.58e-05	5.8e-06	3.33e-06	5.72e-06	3.39e-06	1.07e-05	glutamate formiminotransferase [EC:2.1.2.5]	0.0231784	0.258661
K00604	0.00040653	0.000419856	0.000422185	0.000469941	0.000499586	0.00044349	0.000420805	0.000430331	0.00046613	0.000452302	0.000470429	0.000500294	0.000479358	0.000402008	0.000517428	0.000401291	0.000416701	0.000442688	0.000436249	0.000413451	0.000418054	0.000438404	0.000435877	0.000417163	0.000436549	0.000444202	methionyl-tRNA formyltransferase [EC:2.1.2.9]	0.0264229	0.274783
K00605	0.00157041	0.00108078	0.0010793	0.00154143	0.0013113	0.000992447	0.00120497	0.00115714	0.00163163	0.00169851	0.00162422	0.00138879	0.00146622	0.00138245	0.00101992	0.000951152	0.00101838	0.00135536	0.000981545	0.00103754	0.00103635	0.00132557	0.00131647	0.00149611	0.00139475	0.00128936	aminomethyltransferase [EC:2.1.2.10]	0.110913	0.0282133
K00606	0.000453005	0.000366827	0.000377481	0.000501347	0.000479239	0.000395132	0.000386698	0.000394852	0.000522047	0.000519754	0.000522721	0.000500785	0.000494762	0.000424809	0.000397586	0.000354081	0.000354218	0.000455128	0.000384242	0.000364045	0.000378324	0.000451626	0.000445861	0.000455968	0.000452895	0.000453211	3-methyl-2-oxobutanoate hydroxymethyltransferase [EC:2.1.2.11]	0.0259887	0.00545091
K00608	0	0	0	0	0	0	0	0	0	0	0	0	0	0	0	0	0	0	0	3.84e-08	0	0	0	0	0	0	aspartate carbamoyltransferase [EC:2.1.3.2]	NA	0.550589
K00609	0.00036116	0.000349024	0.000353705	0.000433796	0.000463191	0.0003798	0.000372551	0.000364869	0.000413169	0.000408964	0.000439286	0.000453254	0.000437172	0.000360681	0.000380996	0.000342384	0.000351341	0.000414933	0.000368296	0.000355999	0.000357098	0.000392043	0.000385322	0.000396525	0.000419726	0.00041207	aspartate carbamoyltransferase catalytic subunit [EC:2.1.3.2]	0.0183363	0.0155448
K00610	8.47e-08	3.21e-08	5.49e-08	6.52e-08	3.42e-08	4.97e-08	4.68e-08	1.19e-07	4.69e-08	6.29e-07	8.86e-08	4.95e-08	9.55e-08	8.94e-07	8.93e-07	8.2e-08	7.13e-10	1.48e-07	1.37e-07	1.9e-07	1.71e-07	2.58e-07	7.5e-07	2.42e-07	1.28e-07	3.49e-07	aspartate carbamoyltransferase regulatory subunit	0.482537	0.637562
K00611	0.000266534	0.000180691	0.000202579	0.000387829	0.000465739	0.000227447	0.000270264	0.000222664	0.000342721	0.000358331	0.000419321	0.000425481	0.000380216	0.000280788	0.00020637	0.000216156	0.000222528	0.000352977	0.000236208	0.000234069	0.000229333	0.000301311	0.000297735	0.000341096	0.000374181	0.000351071	ornithine carbamoyltransferase [EC:2.1.3.3]	0.0270661	0.00632805
K00612	0.000269677	8.38e-05	8.87e-05	0.000380975	0.000464265	0.000196013	0.000199831	0.000138087	0.000426634	0.000449725	0.000476949	0.000448591	0.000361962	0.000245783	0.000392405	8.3e-05	0.000120717	0.000324969	0.000145245	0.000129722	0.000111714	0.000278819	0.000289301	0.000334163	0.000338301	0.000309171	carbamoyltransferase [EC:2.1.3.-]	0.0180541	0.184721
K00613	4e-05	5.59e-05	4.9e-05	2.98e-05	3.63e-05	3.14e-05	4.71e-05	4.75e-05	2.69e-05	2.73e-05	2.5e-05	2.75e-05	2.91e-05	1.93e-05	1.19e-05	2.3e-05	2.66e-05	2.16e-05	1.95e-05	2.51e-05	2.17e-05	2.02e-05	1.8e-05	2.15e-05	2.31e-05	1.58e-05	glycine amidinotransferase [EC:2.1.4.1]	0.020561	0.593067
K00614	2.4e-06	2.38e-06	2.91e-06	1.99e-06	1.76e-06	6.01e-06	3.46e-06	3.35e-06	1.36e-06	2.02e-06	1.96e-06	1.42e-06	1.96e-06	5.91e-06	6.26e-06	6.43e-06	5.93e-06	3.73e-06	5.17e-06	5.41e-06	4.93e-06	4.05e-06	4.96e-06	4.42e-06	3.82e-06	4.09e-06	[EC:2.1.-.-]	0.0715642	0.00563271
K00615	0.00101535	0.000994342	0.00101062	0.00115537	0.00128683	0.00102944	0.00101597	0.001028	0.00114355	0.00112953	0.00119027	0.00124783	0.00116396	0.00104479	0.00106258	0.00104077	0.00103245	0.00114153	0.00105068	0.00104238	0.00104584	0.00112152	0.00110581	0.0010905	0.00114021	0.00112681	transketolase [EC:2.2.1.1]	0.0180541	0.0176823
K00616	0.000304579	0.000305426	0.00031466	0.000393389	0.00059547	0.000346633	0.000343205	0.000320811	0.000427471	0.00041698	0.000469401	0.000537226	0.000392127	0.000309276	0.000332368	0.000312409	0.00032055	0.000442206	0.000346638	0.00032858	0.00032649	0.000398597	0.000379895	0.000382396	0.000444058	0.000401365	transaldolase [EC:2.2.1.2]	0.0195644	0.0195548
K00619	6.93e-06	6.7e-06	7.9e-06	2.36e-05	6.3e-06	8.62e-06	8.46e-06	1.09e-05	5.41e-06	6e-06	1.43e-05	1.16e-05	2.69e-05	7.48e-06	7.17e-06	7.06e-06	6.97e-06	5.61e-06	6.4e-06	6.69e-06	7.66e-06	5.54e-06	5.97e-06	6.41e-06	7.12e-06	1.44e-05	amino-acid N-acetyltransferase [EC:2.3.1.1]	0.949653	0.365811
K00620	0.000367273	0.000239003	0.000260131	0.000510615	0.000593698	0.000263834	0.000337895	0.000286121	0.00046503	0.000482403	0.000557375	0.000553565	0.000500778	0.000374142	0.000257412	0.000275265	0.000292314	0.000463798	0.000284695	0.000303334	0.000292675	0.000400588	0.000389017	0.000458385	0.000492774	0.000452867	glutamate N-acetyltransferase / amino-acid N-acetyltransferase [EC:2.3.1.35 2.3.1.1]	0.0202643	0.00742942
K00622	6.88e-08	1.04e-07	6.05e-08	1.17e-06	1.02e-07	3.57e-08	4.81e-08	1.54e-07	1.17e-07	2.8e-07	5.23e-07	2.13e-07	1.04e-06	5.02e-08	2.47e-07	3.46e-08	2.63e-08	9.39e-08	6.35e-08	7.35e-08	4.08e-08	1.12e-07	2.13e-07	2.18e-07	1.24e-07	6.94e-07	arylamine N-acetyltransferase [EC:2.3.1.5]	0.268615	0.131377
K00624	8.72e-07	6.82e-07	8.76e-07	2.69e-07	1.91e-07	5.38e-07	6.72e-07	8.92e-07	1.72e-07	1.62e-06	5.06e-07	5.94e-07	1.22e-07	1.66e-07	1.35e-06	1.64e-07	1.19e-07	4.42e-09	5.25e-08	4.25e-08	5.88e-08	7.14e-09	1.03e-06	5.9e-08	2.04e-07	1.07e-07	carnitine O-acetyltransferase [EC:2.3.1.7]	0.2026	0.270598
K00625	0.000370851	0.000302394	0.00029886	0.000328855	0.000222105	0.000266586	0.000341358	0.00030538	0.000311311	0.000335627	0.000301198	0.000237096	0.000313878	0.000363263	0.000258071	0.000292995	0.000305198	0.000296786	0.000313938	0.000317564	0.000316486	0.00030145	0.000314607	0.000346898	0.000304908	0.000296979	phosphate acetyltransferase [EC:2.3.1.8]	0.633068	0.653193
K00626	0.00130326	0.00161551	0.00152891	0.000947094	0.000722058	0.00149508	0.00139425	0.00148799	0.000923039	0.000908942	0.000806165	0.000777243	0.000973935	0.00134863	0.00144819	0.00158444	0.00155181	0.00101376	0.00141267	0.0015007	0.00146421	0.00113951	0.00115839	0.00110081	0.00100187	0.00106669	acetyl-CoA C-acetyltransferase [EC:2.3.1.9]	0.0183363	0.0108391
K00627	0.0014973	0.00149577	0.00157539	0.00153231	0.00138146	0.00167836	0.00153107	0.00153287	0.0014335	0.00145688	0.00144577	0.00140421	0.00152886	0.00158048	0.00154264	0.00163462	0.00158585	0.00145974	0.00158748	0.00155314	0.00156709	0.00149337	0.00153994	0.00149592	0.00145719	0.00153399	pyruvate dehydrogenase E2 component (dihydrolipoamide acetyltransferase) [EC:2.3.1.12]	0.0655837	0.0236379
K00630	1.17e-09	7.81e-10	4.47e-09	1.87e-09	1.59e-08	9.63e-10	2.9e-09	2.66e-08	1.46e-09	8.38e-10	2.85e-10	1.18e-09	1.1e-09	2.23e-09	3.16e-09	1.78e-09	4.77e-09	1.59e-09	3.65e-09	1.95e-09	8.64e-10	1.33e-09	4.12e-09	4.37e-10	1.5e-09	2.42e-09	glycerol-3-phosphate O-acyltransferase [EC:2.3.1.15]	0.710551	0.209536
K00631	0.000122815	0.000150628	0.000148255	7e-05	7.22e-05	0.000156848	0.000150575	0.000145495	6.88e-05	7.49e-05	6.68e-05	6.41e-05	7.47e-05	0.000130341	0.000113978	0.000157295	0.000157088	9.47e-05	0.000122175	0.000145759	0.000131879	9.86e-05	9.58e-05	0.00010363	9.94e-05	8.7e-05	glycerol-3-phosphate O-acyltransferase [EC:2.3.1.15]	0.0590527	0.0139469
K00632	0.000590854	0.000800815	0.000728238	0.000430967	0.000309693	0.000822538	0.000644459	0.000744402	0.000481448	0.000435601	0.000367745	0.000387213	0.000455182	0.0005757	0.000802053	0.000699855	0.000694398	0.000434349	0.000719558	0.00068776	0.000705552	0.000531275	0.000545447	0.000452173	0.000406292	0.000483656	acetyl-CoA acyltransferase [EC:2.3.1.16]	0.040597	0.0176823
K00633	7.08e-06	1.07e-05	1.61e-05	1.93e-05	1.29e-05	1.8e-05	1.86e-05	1.32e-05	9.46e-06	9.73e-06	1.03e-05	1.18e-05	1.83e-05	1.34e-05	1.55e-05	1.65e-05	1.55e-05	1.53e-05	2.79e-05	1.71e-05	2.02e-05	1.42e-05	1.67e-05	1.33e-05	1.45e-05	2.15e-05	galactoside O-acetyltransferase [EC:2.3.1.18]	0.449605	0.574859
K00634	9.74e-05	8.56e-05	8.27e-05	7.31e-05	5.46e-05	6.85e-05	8.6e-05	8.12e-05	7.3e-05	7.97e-05	7.22e-05	5.72e-05	7.2e-05	0.000112483	7.57e-05	0.000104018	0.000108693	8.88e-05	8.68e-05	0.000106145	9.94e-05	8.96e-05	9.01e-05	0.000102825	9.21e-05	7.95e-05	phosphate butyryltransferase [EC:2.3.1.19]	0.0381699	0.424089
K00635	9.08e-07	8.08e-07	1.51e-06	1.81e-06	9.38e-07	2.3e-06	1.37e-06	3.3e-06	3.93e-07	2.03e-06	1.6e-06	8.05e-07	1.18e-06	5.98e-07	2.92e-06	6.6e-07	3.68e-07	2.36e-07	5.94e-07	4.53e-07	3.52e-07	2.97e-07	8.58e-07	3.61e-07	3.52e-07	1.93e-06	diacylglycerol O-acyltransferase [EC:2.3.1.20]	0.958235	0.216333
K00638	0.000180131	0.000256531	0.000252306	0.000134236	0.000109541	0.000189284	0.000200163	0.000218744	0.000127874	0.00011182	9.72e-05	0.00011162	0.000137936	0.000182466	0.000162793	0.000249098	0.000227861	0.00015113	0.000226952	0.000227996	0.000237113	0.000169214	0.00016414	0.000146096	0.000141186	0.000158604	chloramphenicol O-acetyltransferase [EC:2.3.1.28]	0.0180541	0.0422235
K00639	0.000539504	0.000797466	0.000740384	0.000399003	0.000291188	0.00071994	0.00060672	0.000728022	0.000475484	0.000403943	0.000306036	0.000369034	0.000435597	0.000508561	0.000771193	0.00067054	0.000680217	0.000415166	0.000735061	0.000670854	0.000707348	0.000535866	0.000534209	0.000385314	0.00035385	0.000423732	glycine C-acetyltransferase [EC:2.3.1.29]	0.02204	0.0296014
K00640	0.000338773	0.000295119	0.000311466	0.000382417	0.00035602	0.000304598	0.000335426	0.00031312	0.000348186	0.000363324	0.000369339	0.000351764	0.000381932	0.000375016	0.000375147	0.00035232	0.000356795	0.000381559	0.00035245	0.000356677	0.000346631	0.000372747	0.000381916	0.000385293	0.000384018	0.000385493	serine O-acetyltransferase [EC:2.3.1.30]	0.0766624	0.0528356
K00641	0.000319494	0.000191057	0.000247874	0.000390337	0.000253043	0.00035173	0.000265282	0.000254572	0.000392124	0.000407711	0.000365716	0.000303265	0.000378291	0.000315	0.000360063	0.00022594	0.000219495	0.000300881	0.000302723	0.000222785	0.000250131	0.000319802	0.00035153	0.00031806	0.000284235	0.000326671	homoserine O-acetyltransferase [EC:2.3.1.31]	0.220725	0.303514
K00643	0.00055004	0.000485419	0.000464448	0.000418345	0.000316191	0.000317119	0.000473674	0.000451045	0.00041897	0.00045225	0.000404493	0.000327592	0.000405495	0.000465807	0.000324307	0.00039289	0.000417463	0.000381802	0.00033472	0.000406461	0.000384093	0.000383154	0.000380153	0.000446607	0.000399598	0.00035938	5-aminolevulinate synthase [EC:2.3.1.37]	0.0531258	0.912413
K00645	0.000501661	0.000500886	0.000495552	0.000538321	0.000589298	0.00050117	0.00050257	0.000505587	0.000542431	0.00053367	0.000559674	0.000578648	0.000542923	0.000499982	0.00052474	0.000491999	0.000497842	0.000534855	0.00049786	0.000499523	0.000499334	0.000522794	0.000511684	0.000518216	0.000535694	0.000522934	[acyl-carrier-protein] S-malonyltransferase [EC:2.3.1.39]	0.0180133	0.124128
K00646	3.66e-07	1.12e-07	3.13e-07	1.71e-06	3.76e-06	2.08e-06	9.95e-07	4.84e-07	1.59e-06	1.62e-06	2.59e-06	3.15e-06	1.74e-06	9.38e-07	2.6e-06	9.46e-07	5.06e-07	2.95e-06	1.02e-06	6.47e-07	4.29e-07	2.11e-06	2.24e-06	2.07e-06	3.24e-06	3.35e-06	malonyl-ACP decarboxylase	0.0227788	0.155269
K00647	0.000912873	0.00103911	0.000894101	0.000742551	0.000533149	0.000951354	0.000869457	0.000981464	0.000817918	0.000755286	0.00067373	0.000663008	0.0007576	0.000787446	0.000996637	0.000758321	0.000831108	0.000629668	0.000864293	0.000844764	0.000880835	0.000730461	0.000727513	0.00068258	0.000619269	0.000668706	3-oxoacyl-[acyl-carrier-protein] synthase I [EC:2.3.1.41]	0.055932	0.0289378
K00648	0.000978322	0.00124603	0.00122729	0.000937975	0.000852247	0.00124856	0.00109615	0.00120718	0.000987889	0.000902664	0.000830218	0.000932613	0.000977915	0.000949878	0.00119472	0.00111964	0.00113689	0.000895359	0.00125229	0.00112258	0.00119355	0.00100557	0.00100329	0.000833425	0.000830078	0.0009195	3-oxoacyl-[acyl-carrier-protein] synthase III [EC:2.3.1.180]	0.0259887	0.0361475
K00651	0.000279991	0.000178011	0.000180925	0.000330167	0.000365871	0.000154135	0.00022058	0.000200128	0.000332878	0.000344695	0.000377601	0.000359522	0.000323674	0.000269022	0.000160051	0.00018633	0.000208797	0.000319044	0.000171092	0.000208516	0.000197702	0.000282282	0.00026478	0.000326261	0.000338841	0.00028577	homoserine O-succinyltransferase [EC:2.3.1.46]	0.0192648	0.016814
K00652	0.000345193	0.000370091	0.00036604	0.000410687	0.00050234	0.000406908	0.000373883	0.00037943	0.000421387	0.000395845	0.000437156	0.000487653	0.000419413	0.000343516	0.000400022	0.000356908	0.000352107	0.000402161	0.000393738	0.000366597	0.000378671	0.000395305	0.000382804	0.000363524	0.000397503	0.000407072	8-amino-7-oxononanoate synthase [EC:2.3.1.47]	0.0183775	0.233873
K00655	0.000597243	0.000693262	0.000657694	0.000542808	0.000445465	0.000650485	0.000614796	0.000662995	0.000531253	0.000511846	0.000482216	0.000482832	0.000553838	0.000585567	0.000647953	0.000633004	0.000630425	0.000513314	0.000648592	0.000632505	0.000647377	0.000555733	0.00056209	0.000525213	0.00049994	0.000545764	1-acyl-sn-glycerol-3-phosphate acyltransferase [EC:2.3.1.51]	0.0183775	0.0213017
K00656	3.05e-05	3.32e-05	4.84e-05	8.93e-05	9e-05	5.9e-05	8.9e-05	4.34e-05	4.36e-05	5.39e-05	6.13e-05	7.29e-05	8.34e-05	6.83e-05	5.27e-05	6.24e-05	6.67e-05	7.92e-05	0.000125307	8.4e-05	9.44e-05	6.51e-05	7.27e-05	7.07e-05	8.36e-05	9.82e-05	formate C-acetyltransferase [EC:2.3.1.54]	0.417024	0.258661
K00657	9.2e-05	0.000142536	0.000133861	7.04e-05	6.73e-05	0.000140796	0.000105772	0.000127714	8.8e-05	7.27e-05	6.11e-05	7.75e-05	7.81e-05	8.5e-05	0.000149776	0.000123609	0.000111022	7.69e-05	0.000129054	0.00011168	0.00012241	9.64e-05	9.7e-05	6.37e-05	6.16e-05	7.68e-05	diamine N-acetyltransferase [EC:2.3.1.57]	0.0293651	0.0201835
K00658	0.00133898	0.00149412	0.00151623	0.00120864	0.000876645	0.00154373	0.00138745	0.00146142	0.00118836	0.00117231	0.00103451	0.000989115	0.00121808	0.00136855	0.00150857	0.00149168	0.00146909	0.00113633	0.00154529	0.00144585	0.00149432	0.00126796	0.00132201	0.00118507	0.00108349	0.00122214	2-oxoglutarate dehydrogenase E2 component (dihydrolipoamide succinyltransferase) [EC:2.3.1.61]	0.0235099	0.0201835
K00661	0.000188997	0.000265962	0.000259285	0.000173544	0.000148569	0.000219361	0.000242064	0.000237153	0.000141177	0.000132978	0.000127656	0.000138823	0.000179428	0.000203002	0.000210649	0.000261165	0.000251664	0.000181552	0.000263187	0.000253704	0.000258642	0.000187666	0.000190261	0.000178308	0.000172879	0.000194119	maltose O-acetyltransferase [EC:2.3.1.79]	0.0181199	0.0289378
K00662	1.51e-05	2.31e-05	1.57e-05	1.17e-05	2e-05	2.15e-05	2.68e-05	1.87e-05	1.17e-05	1.34e-05	1.37e-05	1.76e-05	1.26e-05	2.71e-05	6.86e-05	2.96e-05	4.03e-05	2.61e-05	3.21e-05	3.81e-05	3.01e-05	2.37e-05	2.47e-05	2.51e-05	2.75e-05	2.07e-05	aminoglycoside N3'-acetyltransferase [EC:2.3.1.81]	0.413649	0.0134186
K00663	5.64e-06	8.87e-06	1.21e-05	6.91e-06	7.47e-06	6.77e-06	5.41e-06	6.4e-06	5.52e-06	4.64e-06	5.24e-06	6.49e-06	7.47e-06	6.07e-06	4.97e-06	1.17e-05	6.97e-06	7.02e-06	6.56e-06	6.7e-06	5.81e-06	6.47e-06	4.82e-06	4.53e-06	5.98e-06	8.43e-06	aminoglycoside N6'-acetyltransferase [EC:2.3.1.82]	0.263547	0.587838
K00666	0.00181502	0.00143302	0.00146209	0.00155045	0.00116053	0.00139392	0.00157758	0.00146761	0.00152701	0.00167619	0.00156027	0.00123405	0.00148984	0.0018217	0.00127031	0.00155504	0.00155134	0.00150865	0.00137032	0.00152734	0.00146265	0.00151357	0.0015544	0.0017406	0.00157095	0.00147654	fatty-acyl-CoA synthase [EC:6.2.1.-]	0.984194	0.793609
K00672	7.52e-07	3.32e-07	7.23e-07	5.45e-06	4.49e-07	2.81e-06	1.27e-06	7.39e-07	5.24e-07	1.5e-06	1.34e-06	6.46e-07	6.16e-06	1.53e-06	3.42e-06	1.22e-06	4.72e-07	5.7e-07	1.04e-06	5.59e-07	5.16e-07	7.87e-07	2.63e-06	1.05e-06	4.81e-07	4.7e-06	formylmethanofuran--tetrahydromethanopterin N-formyltransferase [EC:2.3.1.101]	0.821004	0.886247
K00673	1.13e-05	5.28e-06	9.93e-06	7.22e-06	7.73e-06	2.52e-05	1.3e-05	1.51e-05	5.1e-06	7.26e-06	7.58e-06	4.79e-06	7.34e-06	1.68e-05	3.3e-05	1.71e-05	8.03e-06	5.3e-06	1.15e-05	6.76e-06	8.45e-06	5.85e-06	1.03e-05	5.04e-06	4.82e-06	1.07e-05	arginine N-succinyltransferase [EC:2.3.1.109]	0.810909	0.0565886
K00674	0.000465035	0.00042057	0.000415259	0.000429056	0.000264177	0.00040471	0.000390754	0.000428991	0.000426052	0.000427723	0.000384425	0.000327467	0.000427646	0.000431873	0.000437807	0.000383153	0.000389476	0.000352091	0.000388228	0.000386099	0.000399223	0.000391779	0.000400672	0.000392796	0.000346317	0.000377674	2,3,4,5-tetrahydropyridine-2-carboxylate N-succinyltransferase [EC:2.3.1.117]	0.438697	0.550923
K00675	2.28e-06	1.29e-06	2.97e-06	5.85e-06	8.37e-06	1.17e-05	4.35e-06	3.84e-06	3.67e-06	4.68e-06	7.22e-06	7.17e-06	5.46e-06	3.49e-06	1.04e-05	4.91e-06	2.33e-06	6.01e-06	3.86e-06	2.02e-06	1.67e-06	4.48e-06	5.35e-06	5.03e-06	6.65e-06	7.82e-06	N-hydroxyarylamine O-acetyltransferase [EC:2.3.1.118]	0.0911963	0.428691
K00676	9.28e-05	0.000107832	9.96e-05	0.000115436	0.000189017	0.000131862	0.000121476	0.000105191	0.00014076	0.000138724	0.000145982	0.000178195	0.000119841	9.43e-05	0.000260898	9.4e-05	0.00012228	0.000136535	0.000122364	0.000113184	0.000102359	0.000122817	0.00012372	0.000110059	0.000132328	0.000111334	ribosomal-protein-alanine N-acetyltransferase [EC:2.3.1.128]	0.0242086	0.711202
K00677	0.000319303	0.000322302	0.000315937	0.000378482	0.000434217	0.000323457	0.000350974	0.000329817	0.000359547	0.000347441	0.00038555	0.000410784	0.000378705	0.000322385	0.000271707	0.000307899	0.000313526	0.00036688	0.000345423	0.000332118	0.000337633	0.000344062	0.000331395	0.000347795	0.000373926	0.000363331	UDP-N-acetylglucosamine acyltransferase [EC:2.3.1.129]	0.0235099	0.0134186
K00680	0.000894552	0.00121776	0.00106787	0.000641027	0.000521785	0.00107808	0.000968538	0.00107436	0.000697865	0.000622241	0.000561067	0.000598357	0.000669695	0.000798453	0.00111865	0.000968048	0.000933164	0.0006266	0.000989485	0.000964176	0.000983432	0.000730056	0.000732669	0.000637728	0.000589938	0.00068921	[EC:2.3.1.-]	0.0245663	0.0184401
K00681	0.000906854	0.00100474	0.00107344	0.000746685	0.000702235	0.0009954	0.000929021	0.000983924	0.000816961	0.000818772	0.000734415	0.000726002	0.000777717	0.000978563	0.000869826	0.00112926	0.00112175	0.0008936	0.000984845	0.00103341	0.001023	0.00094457	0.000933889	0.000897802	0.000858229	0.000781902	gamma-glutamyltranspeptidase [EC:2.3.2.2]	0.0245663	0.0871305
K00683	5.79e-05	9.73e-05	9.16e-05	4.42e-05	2.75e-05	8.87e-05	6.55e-05	8.45e-05	5.3e-05	4.1e-05	3.12e-05	3.8e-05	5.06e-05	4.9e-05	8.17e-05	7.67e-05	6.93e-05	4.23e-05	8.01e-05	6.78e-05	7.79e-05	5.64e-05	5.67e-05	3.79e-05	3.06e-05	4.38e-05	glutaminyl-peptide cyclotransferase [EC:2.3.2.5]	0.0183363	0.0243242
K00684	0.000284995	0.000254187	0.000252908	0.000249755	0.000189061	0.000247662	0.000232495	0.000255739	0.000283969	0.000281171	0.000250456	0.000221816	0.000246744	0.000264855	0.000221106	0.000238659	0.00023717	0.000240728	0.000239983	0.000236287	0.000247845	0.000260463	0.000260196	0.000258219	0.000234217	0.000235128	leucyl/phenylalanyl-tRNA--protein transferase [EC:2.3.2.6]	0.686626	0.294885
K00685	0.000186448	0.000126544	0.000131845	0.000165239	0.000108794	0.000126116	0.000148696	0.000134206	0.000162121	0.000177346	0.000162044	0.000121649	0.000156817	0.000188352	0.000123028	0.000145079	0.000146344	0.000152843	0.000131175	0.000145559	0.000140915	0.000154378	0.000159808	0.000182133	0.000160027	0.000157383	arginine-tRNA-protein transferase [EC:2.3.2.8]	0.973923	0.091364
K00686	7.7e-10	1.46e-09	0	0	2.92e-09	0	0	7.53e-10	9.37e-09	2.69e-09	4.34e-09	3.32e-09	0	2.25e-09	6.34e-08	0	3.1e-08	0	8.76e-10	8.48e-09	0	4.49e-09	3.03e-09	0	1.75e-09	0	protein-glutamine gamma-glutamyltransferase [EC:2.3.2.13]	0.0841009	0.134873
K00687	9.88e-07	1.31e-06	1.13e-06	5.11e-07	6.25e-07	7.13e-07	1.1e-06	1.08e-06	5.71e-07	6.41e-07	5.08e-07	4.98e-07	5.47e-07	1.36e-06	1.82e-06	1.57e-06	2.18e-06	1.03e-06	1.26e-06	1.65e-06	1.48e-06	1.15e-06	1.11e-06	1.13e-06	1.15e-06	7.68e-07	penicillin-binding protein 2B [EC:2.3.2.-]	0.039974	0.00523274
K00688	0.00023106	0.000276504	0.000282906	0.000496726	0.00121126	0.000336744	0.000427681	0.000313583	0.000541168	0.000533539	0.000746624	0.000975278	0.000515476	0.000224339	0.00020647	0.000249401	0.0002973	0.000651254	0.000309071	0.000316414	0.000277834	0.000466164	0.000402394	0.000472722	0.000691409	0.000527945	starch phosphorylase [EC:2.4.1.1]	0.0181199	0.0130807
K00689	5.4e-09	5.31e-08	9.25e-09	1.4e-09	1.54e-08	5.44e-08	1.51e-08	1.16e-08	3.66e-09	3.11e-08	8.03e-09	4.9e-09	1.35e-09	1.4e-08	4.97e-07	2.11e-08	1.11e-07	2.14e-09	4.04e-08	4.53e-09	4.97e-09	1.92e-08	7.38e-08	4.58e-09	3.73e-08	4.1e-09	dextransucrase [EC:2.4.1.5]	0.704952	0.0953849
K00690	0.00011582	0.000140707	0.0001574	0.000215966	0.000476426	0.000151022	0.000208467	0.000152146	0.000229714	0.000219714	0.000293559	0.000386047	0.000219831	0.000103236	8.1e-05	0.00012234	0.00013652	0.000247159	0.000161248	0.000143367	0.000142604	0.000185398	0.000164714	0.000179728	0.000252832	0.00019534	sucrose phosphorylase [EC:2.4.1.7]	0.0204235	0.0110106
K00691	0.000193666	0.000315886	0.000386744	0.000161316	0.000124054	0.00033119	0.000215679	0.000317125	0.000233112	0.000191896	0.000113269	0.000172729	0.000184587	0.000202058	0.000290625	0.000340847	0.000340893	0.000192787	0.000351528	0.000290009	0.000333194	0.00026874	0.000269823	0.000144757	0.000139614	0.000161337	maltose phosphorylase [EC:2.4.1.8]	0.0623084	0.0301087
K00692	3.45e-06	1.15e-06	1.68e-06	4.13e-06	3.26e-06	7.02e-06	2.27e-06	2.16e-06	1.69e-06	5.53e-06	7.45e-06	4.2e-06	3.61e-06	2.77e-06	9.46e-06	3.36e-06	8.85e-07	7.43e-07	2.73e-06	9.35e-07	8.69e-07	1.08e-06	3.97e-06	1.74e-06	1.14e-06	2.46e-06	levansucrase [EC:2.4.1.10]	0.144726	0.389393
K00693	1.26e-06	3.27e-07	3.77e-07	6e-06	0	3.04e-07	2.61e-07	1.3e-06	7.61e-07	3.69e-07	1.31e-06	1.19e-06	6.33e-06	2.71e-06	6.31e-06	3.2e-07	0	4.75e-07	6.74e-07	1.74e-06	2.43e-07	1.72e-07	1.03e-06	3.95e-07	4.17e-07	8.32e-06	glycogen(starch) synthase [EC:2.4.1.11]	0.733241	0.983687
K00694	0.000116923	0.000138295	0.000147379	0.000165176	0.000323616	0.000168151	0.000151553	0.000139623	0.000171621	0.00017613	0.00022164	0.000274549	0.000168496	0.000173151	0.00021302	0.000216299	0.00021515	0.000286445	0.000183891	0.000209938	0.00018513	0.000238036	0.000226868	0.000234565	0.000296472	0.000246988	cellulose synthase (UDP-forming) [EC:2.4.1.12]	0.0183363	0.0706004
K00695	1.14e-06	9.13e-07	9.53e-07	2.19e-05	8.32e-05	8.35e-06	9.65e-06	4.77e-06	3.24e-05	3e-05	4.75e-05	6.62e-05	2.25e-05	1.79e-06	7.3e-06	2.14e-06	6.45e-06	4.15e-05	4.29e-06	7.4e-06	3.9e-06	2.6e-05	1.98e-05	2.57e-05	4.45e-05	2.67e-05	sucrose synthase [EC:2.4.1.13]	0.0171139	0.0335773
K00696	1.08e-05	1.23e-05	1.16e-05	0.000126666	0.000443702	5.12e-05	5.72e-05	2.96e-05	0.000178238	0.000165464	0.000255661	0.000355607	0.00013504	1.42e-05	3.42e-05	1.81e-05	4.2e-05	0.000216248	2.87e-05	4.4e-05	2.81e-05	0.000138992	0.000106142	0.000135724	0.000229487	0.000140809	sucrose-phosphate synthase [EC:2.4.1.14]	0.0181199	0.0311764
K00697	8.83e-05	0.000108941	0.000114095	8.16e-05	7.46e-05	0.000130678	0.000105939	0.000104924	6.54e-05	7.46e-05	7.63e-05	7.29e-05	8.5e-05	0.000115757	0.000122233	0.000145675	0.000131388	0.000101997	0.000121868	0.000130308	0.000120866	0.000107799	0.00011521	0.000103512	0.000100591	0.000111214	trehalose 6-phosphate synthase [EC:2.4.1.15]	0.0375985	0.0062709
K00700	0.000411481	0.000541745	0.000611885	0.000547509	0.00101393	0.000644771	0.00058854	0.000576815	0.000630311	0.000596392	0.000677229	0.000886619	0.000577482	0.000460576	0.000499318	0.000606376	0.000628179	0.000717843	0.000648681	0.0006111	0.000609096	0.000664885	0.000631143	0.000553161	0.000703112	0.000602384	1,4-alpha-glucan branching enzyme [EC:2.4.1.18]	0.0783274	0.389393
K00701	1.21e-06	1.05e-06	2.48e-06	4.38e-06	1.56e-05	1.36e-05	5.33e-06	3.39e-06	6.71e-06	6.31e-06	1e-05	1.29e-05	4.98e-06	1.35e-06	4.1e-06	2.7e-06	1.8e-06	6.35e-06	2.85e-06	1.76e-06	1.03e-06	4.49e-06	4.49e-06	4.16e-06	6.55e-06	4.1e-06	cyclomaltodextrin glucanotransferase [EC:2.4.1.19]	0.0334316	0.0851082
K00703	0.000351538	0.000510712	0.000537659	0.000411294	0.000702558	0.000541377	0.00047921	0.000510397	0.000492682	0.000443205	0.00047777	0.000637025	0.000439704	0.000355906	0.000441922	0.000489959	0.00051045	0.000529321	0.000535956	0.000492306	0.000501839	0.000508566	0.000472276	0.000407352	0.000507355	0.000445559	starch synthase [EC:2.4.1.21]	0.982405	0.946235
K00705	0.000121121	0.000146567	0.000155625	0.000235881	0.000543841	0.000215003	0.000228078	0.000171078	0.000250104	0.000246573	0.00034133	0.000439531	0.000241458	0.00012322	0.000119919	0.000139148	0.000154915	0.000308524	0.000171046	0.000164138	0.000145445	0.000226516	0.000201515	0.000230126	0.000327892	0.000256953	4-alpha-glucanotransferase [EC:2.4.1.25]	0.0181199	0.0115666
K00712	5.5e-06	9e-06	1.01e-05	6.6e-06	5.18e-06	9.72e-06	7.45e-06	9.36e-06	7.03e-06	6.21e-06	4.99e-06	5.77e-06	7.86e-06	6.24e-06	1.28e-05	1.05e-05	1.07e-05	7.89e-06	9.78e-06	9.2e-06	9.41e-06	8.57e-06	8.75e-06	6.81e-06	6.02e-06	6.51e-06	poly(glycerol-phosphate) alpha-glucosyltransferase [EC:2.4.1.52]	0.0766624	0.0361475
K00713	5.56e-10	8.87e-10	8.61e-10	4.42e-09	1.09e-09	2.46e-09	4.16e-09	6.92e-09	1.52e-09	1.74e-07	1.99e-09	2.06e-09	1.17e-09	6.53e-09	2.35e-08	1.54e-09	0	4.78e-09	6.68e-09	1.21e-09	5.85e-10	1.27e-09	5.59e-09	6.1e-09	2.15e-09	7.49e-09	UDP-glucose:(glucosyl)LPS alpha-1,2-glucosyltransferase [EC:2.4.1.-]	0.795239	0.681514
K00720	2.73e-05	3.15e-05	3.12e-05	2.37e-05	3.81e-05	3.2e-05	3.24e-05	2.93e-05	2.34e-05	2.45e-05	2.95e-05	3.21e-05	2.37e-05	5.11e-05	3.76e-05	5.97e-05	5.96e-05	4.97e-05	4.72e-05	5.77e-05	5.2e-05	4.62e-05	4.5e-05	4.97e-05	5.2e-05	4.03e-05	ceramide glucosyltransferase [EC:2.4.1.80]	0.85816	0.257755
K00721	0.000585207	0.000758563	0.000765842	0.000688939	0.000955015	0.000859507	0.000714051	0.000774391	0.000794962	0.000719601	0.000754403	0.000931057	0.000718356	0.000553358	0.000686936	0.00066119	0.000701232	0.000758484	0.000808203	0.000700729	0.00074301	0.000754889	0.000716218	0.00061647	0.000728816	0.000694125	dolichol-phosphate mannosyltransferase [EC:2.4.1.83]	0.466747	0.475375
K00729	1.55e-07	4.91e-08	1.07e-07	2.17e-06	7.71e-06	1.04e-06	9.25e-07	4.48e-07	3.03e-06	2.88e-06	4.6e-06	6.18e-06	2.31e-06	2.59e-07	9.66e-07	2.33e-07	4.58e-07	3.43e-06	3.39e-07	5.74e-07	2.71e-07	2.19e-06	1.77e-06	2.18e-06	3.68e-06	2.45e-06	dolichyl-phosphate beta-glucosyltransferase [EC:2.4.1.117]	0.0171139	0.0319227
K00737	1.73e-07	5.52e-08	1.16e-07	4.38e-07	1.07e-07	5.14e-07	1.85e-07	1.82e-07	1.57e-07	3.82e-07	3.46e-07	1.6e-07	4.38e-07	4.63e-07	6.51e-07	2.86e-07	6.02e-08	1.56e-07	2.62e-07	1.57e-07	1.27e-07	2.35e-07	6.07e-07	4.03e-07	1.88e-07	9.64e-07	beta-1,4-mannosyl-glycoprotein beta-1,4-N-acetylglucosaminyltransferase [EC:2.4.1.144]	0.710551	0.840905
K00748	0.000475667	0.000515886	0.000514099	0.000654717	0.00108053	0.000564776	0.000551083	0.000536401	0.000725015	0.000679402	0.000811179	0.00097106	0.000669684	0.000469096	0.000512925	0.00049357	0.000521646	0.00074577	0.000535462	0.000527833	0.00052174	0.000653895	0.000598343	0.000618496	0.000751701	0.000643347	lipid-A-disaccharide synthase [EC:2.4.1.182]	0.0180541	0.014218
K00752	7.3e-05	0.000116435	0.000138678	5.87e-05	4.84e-05	0.000129576	8.24e-05	0.000124538	9.8e-05	7.85e-05	4.54e-05	7.28e-05	6.66e-05	7.31e-05	0.00010998	0.000115993	0.000137257	7.11e-05	0.000138539	0.000112919	0.000131162	0.00010653	0.000104427	5.65e-05	5.43e-05	5.55e-05	hyaluronan synthase [EC:2.4.1.212]	0.0668754	0.0493266
K00754	0.000660909	0.000719041	0.000688741	0.000717453	0.000943306	0.000730195	0.000699175	0.000698508	0.000799909	0.000745351	0.000811428	0.000900932	0.000712912	0.000611985	0.000684556	0.000628416	0.000616929	0.000790896	0.000701401	0.000653018	0.000671324	0.000741036	0.000708009	0.000714894	0.000788301	0.000758342	[EC:2.4.1.-]	0.0504528	0.0163716
K00756	0.000108461	0.000131376	0.000141876	0.00012363	6.18e-05	0.00011364	0.000174344	0.000125298	6.03e-05	7.37e-05	6.14e-05	5.6e-05	0.000117044	0.000125361	7.56e-05	0.000132204	0.000136501	8.62e-05	0.000191555	0.000150454	0.000162607	8.97e-05	0.000108389	9.63e-05	8.88e-05	0.000116103	pyrimidine-nucleoside phosphorylase [EC:2.4.2.2]	0.0227788	0.356856
K00757	0.00012693	0.000213781	0.000195992	9.03e-05	6.44e-05	0.000186968	0.000144396	0.00018851	0.000117703	9.2e-05	6.44e-05	8.83e-05	0.000101801	0.000109126	0.000193784	0.000162578	0.000160797	9.08e-05	0.000184152	0.000158411	0.000173879	0.000125906	0.000123156	7.7e-05	6.98e-05	9.42e-05	uridine phosphorylase [EC:2.4.2.3]	0.0214166	0.0243242
K00758	0.000237455	0.000300168	0.000290433	0.000175136	0.000135054	0.000208671	0.000289335	0.000267683	0.000133159	0.000149914	0.000128694	0.000123419	0.000178222	0.000230583	0.000157113	0.000266755	0.000278182	0.000171372	0.00025114	0.000271259	0.000264247	0.00017702	0.00018519	0.00018939	0.000176835	0.00017248	thymidine phosphorylase [EC:2.4.2.4]	0.0183363	0.184721
K00759	0.000221998	0.000232633	0.000209087	0.000218639	0.000298206	0.000200878	0.000223035	0.000219728	0.000239535	0.000241166	0.000258954	0.00027328	0.000219455	0.000197848	0.000191976	0.00019343	0.000198815	0.000238589	0.000183486	0.000203264	0.000193509	0.000218524	0.000211451	0.000230525	0.000243634	0.000214625	adenine phosphoribosyltransferase [EC:2.4.2.7]	0.0803656	0.0190735
K00760	0.000235376	0.000216847	0.000231805	0.000219879	0.000164637	0.000225998	0.000216203	0.000228607	0.000234745	0.000242268	0.000206779	0.000190784	0.00021716	0.000241896	0.000240607	0.000227525	0.000242432	0.000209924	0.000244574	0.000231085	0.000236992	0.000231391	0.0002395	0.000221285	0.000204023	0.00020758	hypoxanthine phosphoribosyltransferase [EC:2.4.2.8]	0.565491	0.129953
K00761	0.000232716	0.000209379	0.000227247	0.00026075	0.00032415	0.000243197	0.000238632	0.000224282	0.000288916	0.000294474	0.0002955	0.000313884	0.000256785	0.00024779	0.00025238	0.000233998	0.000248169	0.000289379	0.000258114	0.000243338	0.000241017	0.000276365	0.00027492	0.000270389	0.000290087	0.000255787	uracil phosphoribosyltransferase [EC:2.4.2.9]	0.0200245	0.035319
K00762	0.000364644	0.000366032	0.000358545	0.000379179	0.000399833	0.000358845	0.000353365	0.000365118	0.000400258	0.000390263	0.000395857	0.000406099	0.000382834	0.000355558	0.000370843	0.00034823	0.000360062	0.00038103	0.000358529	0.00035864	0.000362337	0.000378648	0.000369521	0.000372069	0.000378188	0.000364332	orotate phosphoribosyltransferase [EC:2.4.2.10]	0.0293651	0.0431938
K00763	0.000379168	0.000309009	0.000340632	0.000359955	0.000282491	0.000325772	0.000317157	0.000321274	0.000357008	0.000381687	0.00035416	0.000303095	0.000351766	0.000395932	0.000343512	0.000370977	0.000354518	0.000363966	0.000324648	0.000339578	0.000333242	0.000368253	0.000382711	0.000390576	0.000363063	0.0003707	nicotinate phosphoribosyltransferase [EC:2.4.2.11]	0.942692	0.333288
K00764	0.0009255	0.000849255	0.000855545	0.0010296	0.000996711	0.00086694	0.000874879	0.000880817	0.00103793	0.00101967	0.00103179	0.00102474	0.00102523	0.000858731	0.000853745	0.000769914	0.000785816	0.000918439	0.000861206	0.00080521	0.000836735	0.000913906	0.00090366	0.00090616	0.000910193	0.000920674	amidophosphoribosyltransferase [EC:2.4.2.14]	0.037419	0.00719489
K00765	0.000382368	0.000350724	0.000356149	0.000416011	0.000398323	0.000373606	0.000359015	0.000367096	0.000432616	0.000423943	0.000421201	0.000418795	0.000415981	0.000367978	0.00036413	0.000334958	0.000348539	0.00038535	0.000371521	0.00035209	0.000366759	0.000389751	0.000386462	0.000381685	0.000381445	0.000381123	ATP phosphoribosyltransferase [EC:2.4.2.17]	0.0285115	0.00687354
K00766	0.000448395	0.000433923	0.000443087	0.000553602	0.000650933	0.000456782	0.000458249	0.000454384	0.000550093	0.000536209	0.000589041	0.000623077	0.000560844	0.000440996	0.000375696	0.000426066	0.000426464	0.000549241	0.000449873	0.000435395	0.00044303	0.000513557	0.000490492	0.00050873	0.000551367	0.00051842	anthranilate phosphoribosyltransferase [EC:2.4.2.18]	0.0183363	0.00563271
K00767	0.000218597	0.000310255	0.000304884	0.000284425	0.000404266	0.00033074	0.000299267	0.000309012	0.00027917	0.000249005	0.000292865	0.000370805	0.000305766	0.000217789	0.000320782	0.000281545	0.000282913	0.000287274	0.000305105	0.000282272	0.000289588	0.000276962	0.000262514	0.000230779	0.000277576	0.000275603	nicotinate-nucleotide pyrophosphorylase (carboxylating) [EC:2.4.2.19]	0.93033	0.206358
K00768	0.000347814	0.000278562	0.000263091	0.000291374	0.000203454	0.000230292	0.000264838	0.000265118	0.000293481	0.000308586	0.000289814	0.000227509	0.000279079	0.000326529	0.000221718	0.000269897	0.000240711	0.000267116	0.000235379	0.000256304	0.000259933	0.000274698	0.000276448	0.000307763	0.000271851	0.000281985	nicotinate-nucleotide--dimethylbenzimidazole phosphoribosyltransferase [EC:2.4.2.21]	0.963021	0.0871305
K00769	0.000119166	8.24e-05	8.12e-05	0.000101262	7.24e-05	5.86e-05	8.72e-05	8.2e-05	0.000105982	0.000115418	0.000104372	8.01e-05	9.51e-05	0.000124145	7.21e-05	9.6e-05	0.000103274	0.000106586	8.31e-05	0.000101004	9.57e-05	0.000105832	0.000104827	0.000125384	0.00011198	9.86e-05	xanthine phosphoribosyltransferase [EC:2.4.2.22]	0.810909	0.102025
K00772	0.000105986	0.000129292	0.00012099	0.000119045	0.000274375	0.000109023	0.000140188	0.000122981	0.00014068	0.000140906	0.000179511	0.000223771	0.000126744	0.000122794	8.1e-05	0.000144004	0.000161358	0.000192042	0.000116018	0.000153583	0.000133452	0.000156827	0.000137711	0.000161809	0.000202473	0.00013914	5'-methylthioadenosine phosphorylase [EC:2.4.2.28]	0.0531258	0.194332
K00773	0.000467191	0.000470344	0.000471101	0.000514468	0.000516617	0.000475442	0.00045889	0.000475293	0.000513838	0.000497629	0.000505892	0.000520637	0.00051457	0.000455523	0.000506878	0.000447724	0.00045081	0.000485607	0.000479453	0.000454463	0.000465696	0.000487149	0.000481984	0.000470703	0.000478544	0.000494371	queuine tRNA-ribosyltransferase [EC:2.4.2.29]	0.0543821	0.200176
K00776	1.55e-09	0	0	0	1.95e-09	0	0	0	1.58e-09	3.07e-09	3.64e-09	0	0	0	3.26e-08	0	0	0	0	6.18e-09	0	0	0	0	0	0	NAD-diphthamide ADP-ribosyltransferase [EC:2.4.2.36]	0.0356609	0.155988
K00777	0.000162689	3.52e-05	4.48e-05	0.000175683	0.00010366	5.54e-05	7.52e-05	6.38e-05	0.000191531	0.000208338	0.000189535	0.000129568	0.000157164	0.000139223	7.68e-05	3.57e-05	4.26e-05	0.000129794	5.27e-05	5.05e-05	5.52e-05	0.000125895	0.000131775	0.00016285	0.000135924	0.000129904	[EC:2.4.2.-]	0.0819158	0.035319
K00782	4.86e-05	6.77e-05	5.15e-05	2.58e-05	2.14e-05	5.37e-05	5.4e-05	5.81e-05	2.62e-05	2.36e-05	2.42e-05	2.21e-05	2.73e-05	3.15e-05	3.98e-05	3.42e-05	2.83e-05	1.7e-05	3.5e-05	3.6e-05	3.71e-05	2.16e-05	2.5e-05	2.36e-05	1.82e-05	2.89e-05	hypothetical protein	0.0415279	0.0335773
K00783	0.00013799	0.000194803	0.000193205	0.000133134	0.000183724	0.000191637	0.000171726	0.000184286	0.000146465	0.000134603	0.000135328	0.000172259	0.000140747	0.000140056	0.000168444	0.000184855	0.000184433	0.000153408	0.000190315	0.000180266	0.000183595	0.000160164	0.000156969	0.00013174	0.00014703	0.000144499	23S rRNA (pseudouridine1915-N3)-methyltransferase [EC:2.1.1.177]	0.298763	0.046554
K00784	0.000184584	0.000213674	0.000209252	0.000221238	0.000357577	0.000228221	0.000192872	0.000213109	0.000287114	0.000263863	0.000285203	0.00034058	0.000227993	0.000164871	0.000215663	0.000181731	0.000193393	0.000264185	0.000207528	0.000191779	0.000197123	0.000248415	0.000226982	0.000217292	0.00025546	0.000219799	ribonuclease Z [EC:3.1.26.11]	0.0235099	0.0251615
K00785	1.78e-07	5.4e-08	3.12e-08	1.02e-07	2.93e-08	8.69e-08	6.74e-08	7.19e-08	9.33e-08	3.11e-07	1.88e-07	7.3e-08	2.13e-07	1.64e-06	3.97e-07	1.34e-07	0	2.99e-07	2.04e-07	4.04e-07	3.07e-07	5.09e-07	1.59e-06	5e-07	2.11e-07	6.38e-07	beta-galactosamide-alpha-2,3-sialyltransferase [EC:2.4.99.-]	0.25991	0.237277
K00786	0.000160867	0.00016298	0.000154097	0.000137732	9.18e-05	0.000145122	0.000132475	0.000152873	0.000156453	0.000144841	0.00012933	0.00011469	0.000136288	0.00012845	0.000138447	0.000121054	0.000110596	0.000110576	0.000127764	0.000116711	0.000130975	0.000126354	0.000128091	0.0001241	0.000102851	0.000127502	[EC:2.4.-.-]	0.0836785	0.653193
K00788	0.000385189	0.000402034	0.000414857	0.000431792	0.000559678	0.000398503	0.000420448	0.000404954	0.000444577	0.000437395	0.000464227	0.000518067	0.000432966	0.000392269	0.000410499	0.000414268	0.000424288	0.000463336	0.000425217	0.000421147	0.000418539	0.000440829	0.000431385	0.000424602	0.000463052	0.000431259	thiamine-phosphate pyrophosphorylase [EC:2.5.1.3]	0.0264229	0.0251615
K00789	0.000569456	0.000571301	0.000563343	0.00065107	0.000712566	0.000584724	0.000570829	0.000582827	0.000653218	0.000636144	0.000670653	0.000705858	0.000657466	0.000541416	0.000596639	0.00052575	0.000535396	0.000611291	0.000570292	0.000544937	0.000557088	0.000597066	0.000587582	0.000579573	0.000608103	0.000609018	S-adenosylmethionine synthetase [EC:2.5.1.6]	0.0180541	0.035319
K00790	0.000556464	0.000543146	0.000546334	0.000665551	0.000790616	0.000577645	0.000565608	0.000562108	0.000670582	0.000653134	0.000712597	0.000760512	0.00066939	0.000540303	0.000582826	0.000521196	0.000528697	0.000641439	0.000553304	0.000536125	0.000541758	0.000608093	0.000591446	0.000598762	0.000641579	0.000629047	UDP-N-acetylglucosamine 1-carboxyvinyltransferase [EC:2.5.1.7]	0.0180541	0.016814
K00791	0.000388282	0.000386778	0.000395325	0.000463933	0.000524551	0.000409837	0.000396561	0.00040022	0.000458422	0.000443907	0.000477518	0.000509325	0.000468569	0.000386084	0.00043224	0.000383187	0.000380823	0.000442139	0.000407064	0.000386637	0.000394631	0.00042807	0.000418292	0.000411247	0.000437741	0.000439522	tRNA dimethylallyltransferase [EC:2.5.1.75]	0.0183363	0.0565886
K00793	0.000246872	0.000268798	0.000266454	0.000287349	0.00033437	0.000275364	0.000265375	0.000273101	0.000285399	0.000271992	0.000296147	0.000324456	0.000294045	0.000243197	0.000255026	0.000253181	0.000256543	0.00027688	0.000268478	0.000259195	0.000264341	0.000270893	0.000261122	0.000257431	0.000275971	0.000273608	riboflavin synthase [EC:2.5.1.9]	0.0302368	0.0410028
K00794	0.000248369	0.000264979	0.000255658	0.000263551	0.00026325	0.000248308	0.000255197	0.000259997	0.00024704	0.000240685	0.000255353	0.00026327	0.000267425	0.000241841	0.000251109	0.000247909	0.000250524	0.000247576	0.000246637	0.00025194	0.000252015	0.000244303	0.000240199	0.00024494	0.000250159	0.000255594	6,7-dimethyl-8-ribityllumazine synthase [EC:2.5.1.78]	0.805239	0.491477
K00795	0.000321439	0.000232104	0.000230251	0.000374463	0.000352834	0.000239716	0.000285217	0.000251496	0.000338925	0.000352226	0.000380782	0.000348441	0.000362759	0.000314336	0.000254675	0.000234099	0.000244223	0.000324768	0.000242422	0.000255994	0.000249619	0.000298093	0.000297902	0.000346517	0.00034347	0.000335355	farnesyl diphosphate synthase [EC:2.5.1.1 2.5.1.10]	0.0309399	0.0184401
K00796	0.000383718	0.000351701	0.000353481	0.000436069	0.000421035	0.000374073	0.000367951	0.000369068	0.000434776	0.00042864	0.000438281	0.00043457	0.000434435	0.000361126	0.00037077	0.000320961	0.000330709	0.000386919	0.000364557	0.000339452	0.000353657	0.000382579	0.000379974	0.000381866	0.000385391	0.000393211	dihydropteroate synthase [EC:2.5.1.15]	0.0476791	0.0135912
K00797	7.96e-05	0.000114581	0.000120781	0.000145415	0.000349758	0.000180532	0.000147192	0.000113247	0.000161961	0.000159751	0.000216795	0.00028149	0.000152881	9.43e-05	0.00017904	0.000126514	0.000122558	0.000203459	0.000118747	0.000119341	9.67e-05	0.000155139	0.000144193	0.000148212	0.000208994	0.00015924	spermidine synthase [EC:2.5.1.16]	0.0312238	0.274783
K00798	0.000419801	0.000344616	0.000339869	0.00055235	0.000961247	0.000379189	0.000413949	0.000371482	0.000655269	0.000644378	0.000759784	0.000859123	0.000549744	0.000397386	0.000336971	0.000340543	0.000368972	0.000661647	0.000341919	0.000378732	0.000353831	0.000554329	0.000502007	0.000576184	0.000686265	0.000543708	cob(I)alamin adenosyltransferase [EC:2.5.1.17]	0.0183363	0.0115666
K00799	0.00119628	0.000946426	0.000962173	0.00123123	0.00156005	0.000971206	0.00109918	0.000986895	0.00128269	0.00134688	0.00146418	0.00143992	0.00119998	0.00119074	0.000878314	0.00103901	0.00106227	0.00135093	0.000873331	0.0010387	0.000951882	0.00120853	0.00116558	0.00136615	0.00142936	0.00121313	glutathione S-transferase [EC:2.5.1.18]	0.0180541	0.0289378
K00800	0.000534634	0.000549492	0.000560779	0.000625602	0.000646034	0.00058957	0.000564846	0.000570222	0.000594216	0.000580584	0.000611222	0.000641146	0.000636536	0.000531914	0.000584896	0.000535476	0.000537904	0.000574778	0.000576622	0.000541326	0.000554734	0.000568154	0.000565441	0.000546421	0.000571562	0.000590278	3-phosphoshikimate 1-carboxyvinyltransferase [EC:2.5.1.19]	0.0364627	0.324624
K00801	4.68e-06	1.03e-05	2.9e-06	1.05e-05	2.89e-05	2.24e-05	1.97e-05	8.56e-06	1.14e-05	1.33e-05	1.74e-05	2.45e-05	1.23e-05	7.38e-06	7.53e-05	4.46e-06	1.31e-05	1.36e-05	1.58e-05	1.37e-05	6.48e-06	8.8e-06	1.34e-05	9.35e-06	1.45e-05	1.22e-05	farnesyl-diphosphate farnesyltransferase [EC:2.5.1.21]	0.0951653	0.867993
K00802	2.62e-08	8.06e-09	1.19e-09	1.59e-07	3.07e-08	2.17e-08	2.89e-08	5.57e-08	1.35e-08	1.73e-08	5.17e-08	2.32e-08	1.26e-07	4.92e-08	3.54e-07	9.59e-09	0	1.81e-08	3.85e-08	1.8e-08	3.33e-08	1.01e-08	4.01e-08	3.88e-08	2.39e-08	2.54e-07	spermine synthase [EC:2.5.1.22]	0.351601	0.603884
K00803	8.62e-05	8.07e-05	7.01e-05	6.6e-05	4.28e-05	7.54e-05	7.35e-05	7.53e-05	6.61e-05	6.77e-05	6.47e-05	5.01e-05	6.21e-05	8.04e-05	6.63e-05	7.19e-05	6.05e-05	5.92e-05	6.35e-05	6.77e-05	6.89e-05	6.35e-05	6.48e-05	7.11e-05	6.08e-05	6.9e-05	alkyldihydroxyacetonephosphate synthase [EC:2.5.1.26]	0.0415279	0.719529
K00805	5.86e-05	4.3e-05	4.46e-05	9.04e-05	9.4e-05	5.45e-05	7.23e-05	5.01e-05	7.62e-05	8.31e-05	9.09e-05	8.87e-05	8.61e-05	5.14e-05	7.1e-05	2.86e-05	3.93e-05	6.86e-05	6.35e-05	4.63e-05	4.82e-05	5.79e-05	6.25e-05	6.68e-05	7.13e-05	7.68e-05	heptaprenyl diphosphate synthase [EC:2.5.1.30]	0.0270661	0.11388
K00806	0.00032782	0.000311823	0.000306908	0.000377442	0.000413115	0.000324305	0.000319191	0.000323664	0.000388509	0.000377682	0.000400386	0.000412632	0.000380548	0.00031576	0.000326535	0.000291562	0.000302122	0.000359927	0.000317624	0.000307027	0.000315683	0.000349132	0.000339058	0.00034481	0.000358455	0.00034723	undecaprenyl diphosphate synthase [EC:2.5.1.31]	0.0171139	0.0163716
K00808	4.7e-05	6.01e-05	5.88e-05	4.69e-05	2.55e-05	3.28e-05	4.4e-05	4.77e-05	2.26e-05	2.66e-05	2.8e-05	2.36e-05	4.43e-05	3.4e-05	3.58e-05	4.46e-05	3.71e-05	2.51e-05	2.99e-05	3.58e-05	3.17e-05	2.7e-05	3.15e-05	3.37e-05	2.83e-05	5.2e-05	homospermidine synthase [EC:2.5.1.44]	0.0259887	0.148035
K00809	0.000140342	0.000232002	0.000216883	0.000119931	0.000116202	0.00020033	0.000150977	0.000207863	0.000146539	0.000113391	9.58e-05	0.000128064	0.000131606	0.000122116	0.000152457	0.000184737	0.000169011	0.000120698	0.000196934	0.000170657	0.000193551	0.000153473	0.000144276	9.75e-05	9.87e-05	0.000121065	deoxyhypusine synthase [EC:2.5.1.46]	0.0252937	0.0580741
K00810	0	0	1.21e-08	0	1.57e-08	2.87e-08	1.3e-07	6.34e-08	0	1.71e-09	1.33e-08	0	0	1.74e-08	4.82e-07	1.61e-07	1.71e-07	3.62e-08	2.02e-07	1.31e-07	2.5e-08	1.4e-08	0	3.06e-10	1.06e-08	3.2e-08	[EC:2.5.1.-]	0.901939	0.035319
K00812	0.0011598	0.00135633	0.00127103	0.00109629	0.00103685	0.00121276	0.00118588	0.00127269	0.00113477	0.00106607	0.00103476	0.00107987	0.00111833	0.00111275	0.00128797	0.00119882	0.00121599	0.00107802	0.00126551	0.00123216	0.00125207	0.00114221	0.00111425	0.00105949	0.0010432	0.0010846	aspartate aminotransferase [EC:2.6.1.1]	0.0195644	0.0309004
K00813	0.000171487	7.42e-05	8.3e-05	0.000155343	0.000101477	9.38e-05	0.00010742	9.49e-05	0.000174009	0.000191126	0.000172589	0.000122812	0.000143146	0.000183067	0.000112171	0.000109852	0.000115942	0.00015416	0.00010383	0.000117113	0.000115785	0.000152789	0.000156967	0.000184401	0.000160518	0.000140619	aspartate aminotransferase [EC:2.6.1.1]	0.106323	0.0515087
K00817	0.000859088	0.000753306	0.000772261	0.000956692	0.000944354	0.000789369	0.000827286	0.000790193	0.000927655	0.000943038	0.000974204	0.000947153	0.000950218	0.000838225	0.000780592	0.000753405	0.000772409	0.000890712	0.000784865	0.0007801	0.000782396	0.000856543	0.000856321	0.000897441	0.000904685	0.000892393	histidinol-phosphate aminotransferase [EC:2.6.1.9]	0.0390726	0.00599055
K00818	0.000802266	0.000845221	0.000826831	0.000823331	0.000850568	0.000825515	0.000783499	0.000838476	0.000870534	0.000830088	0.000839284	0.000872203	0.000831023	0.000734985	0.000774232	0.000752118	0.000744293	0.000784338	0.000789334	0.000759322	0.000786048	0.000801363	0.000780839	0.000759275	0.000768107	0.000786696	acetylornithine aminotransferase [EC:2.6.1.11]	0.156788	0.209536
K00819	0.00052689	0.000471439	0.000467201	0.00052199	0.000319047	0.000478775	0.00042478	0.000478612	0.000539363	0.000531953	0.000476079	0.000412424	0.0005126	0.000460566	0.000512002	0.000397453	0.000390595	0.000404073	0.000454806	0.000402906	0.000437272	0.000455732	0.000471151	0.000440949	0.000385014	0.000465844	ornithine--oxo-acid transaminase [EC:2.6.1.13]	0.912556	0.699184
K00820	0.00107304	0.0011361	0.00104667	0.00110837	0.00117016	0.00107548	0.00107546	0.00110386	0.00111913	0.00106886	0.00113066	0.00117142	0.00111052	0.00099545	0.00102491	0.00097769	0.000990925	0.00104841	0.00103796	0.00103399	0.00104882	0.00104242	0.00101396	0.00103489	0.00105652	0.00106688	glucosamine--fructose-6-phosphate aminotransferase (isomerizing) [EC:2.6.1.16]	0.255812	0.0541376
K00821	0.000774752	0.000721918	0.000714114	0.000795169	0.000790523	0.000710478	0.0007416	0.000730895	0.000800538	0.000799953	0.000812423	0.00079344	0.000786692	0.000719352	0.000661659	0.000657475	0.00065899	0.000731979	0.000680003	0.000673133	0.000682727	0.00071877	0.000711542	0.000746172	0.000739619	0.000736565	acetylornithine/N-succinyldiaminopimelate aminotransferase [EC:2.6.1.11 2.6.1.17]	0.0452279	0.0062709
K00822	0.000571544	0.0003537	0.000368172	0.00054896	0.000411364	0.00037219	0.000412424	0.000383102	0.000561985	0.00060623	0.000575909	0.000448617	0.000511306	0.000558119	0.000402423	0.000393724	0.00039118	0.000505474	0.000360554	0.000397256	0.000380625	0.000492783	0.000503971	0.000590967	0.000529958	0.00051232	beta-alanine--pyruvate transaminase [EC:2.6.1.18]	0.110913	0.091364
K00823	0.000740302	0.00077537	0.00071402	0.000617314	0.000469073	0.00066736	0.000679979	0.000722014	0.000636295	0.000621786	0.000572204	0.000519577	0.00060624	0.000694382	0.000645626	0.000690509	0.000673622	0.000575962	0.000671614	0.000689674	0.000698844	0.000628658	0.000628731	0.000641445	0.000573575	0.000634273	4-aminobutyrate aminotransferase [EC:2.6.1.19]	0.0227788	0.0624266
K00824	0.000270361	0.000204064	0.000208044	0.000267349	0.000157779	0.000168076	0.000217774	0.000210505	0.000230626	0.000248993	0.000237915	0.00018342	0.000264066	0.000281627	0.000175838	0.000228802	0.000238599	0.000228688	0.00020458	0.000232518	0.00022988	0.000231256	0.000237401	0.00027044	0.000239584	0.000238855	D-alanine transaminase [EC:2.6.1.21]	0.973923	0.361093
K00826	0.00103077	0.00112959	0.00111026	0.000964398	0.000923896	0.0010118	0.00101727	0.00108548	0.00103014	0.00099481	0.000938838	0.000968458	0.000983404	0.00100832	0.000971263	0.00105178	0.00109473	0.00097983	0.00107284	0.001066	0.00108703	0.00102613	0.00100117	0.000966016	0.000955093	0.000922569	branched-chain amino acid aminotransferase [EC:2.6.1.42]	0.0356609	0.133549
K00830	0.000469818	0.000402055	0.000390477	0.000528238	0.000759029	0.000322574	0.000445771	0.000402556	0.000575855	0.000584709	0.0006591	0.000694153	0.000533917	0.000440419	0.000274385	0.000373264	0.000426002	0.000595302	0.000334749	0.000414242	0.000380928	0.000512611	0.000465223	0.000566016	0.000625984	0.000473433	alanine-glyoxylate transaminase / serine-glyoxylate transaminase / serine-pyruvate transaminase [EC:2.6.1.44 2.6.1.45 2.6.1.51]	0.0183363	0.0150581
K00831	0.000491464	0.000493563	0.000502772	0.000485912	0.000277954	0.000484513	0.000469226	0.000498705	0.000434423	0.000430536	0.000389253	0.000345302	0.000492951	0.000476457	0.000473406	0.000463825	0.000464382	0.000377705	0.000495482	0.000461837	0.000485245	0.000426892	0.000443684	0.000412	0.000366286	0.000439926	phosphoserine aminotransferase [EC:2.6.1.52]	0.039974	0.0504773
K00832	0.000342229	0.000218433	0.000227112	0.000279641	0.000201238	0.000242773	0.000263011	0.000239361	0.000308169	0.000338872	0.000305359	0.000228111	0.000264762	0.000348251	0.000228451	0.000255622	0.000258817	0.000283218	0.000226921	0.000255761	0.000246483	0.000283574	0.00029358	0.000336592	0.000295298	0.000255846	aromatic-amino-acid transaminase [EC:2.6.1.57]	0.605138	0.147322
K00833	0.000582458	0.000746539	0.000720735	0.000587088	0.000675151	0.000705884	0.000671645	0.000700321	0.000575741	0.000534234	0.000569355	0.000650216	0.000611557	0.000589443	0.000694008	0.000712732	0.000680163	0.000606439	0.000704819	0.000689233	0.000695462	0.000622868	0.000606437	0.000557144	0.000589366	0.000622743	adenosylmethionine-8-amino-7-oxononanoate aminotransferase [EC:2.6.1.62]	0.0911963	0.0457027
K00835	6.71e-07	2.78e-07	4.86e-07	1.13e-05	4.4e-05	4.04e-06	4.89e-06	3.14e-06	1.7e-05	1.72e-05	2.49e-05	3.47e-05	1.17e-05	3.49e-06	6.57e-06	1.18e-06	3.4e-06	2.6e-05	2.35e-06	4.37e-06	2.05e-06	1.67e-05	1.41e-05	1.62e-05	2.79e-05	1.7e-05	valine--pyruvate aminotransferase [EC:2.6.1.66]	0.0171139	0.0335773
K00836	0.000219698	0.000196647	0.000198907	0.000207509	0.000155444	0.000216282	0.000188563	0.000206906	0.000218025	0.000222025	0.000202576	0.000174496	0.000204416	0.000224105	0.000243598	0.000213529	0.000199686	0.000197312	0.000210125	0.000200783	0.000205361	0.000214559	0.000222275	0.000211593	0.000188243	0.000203698	diaminobutyrate-2-oxoglutarate transaminase [EC:2.6.1.76]	0.984194	0.525237
K00837	0.000938705	0.000822029	0.000878651	0.000851602	0.000726709	0.00078221	0.000822147	0.000824729	0.000870257	0.000907772	0.000847476	0.000761168	0.000831145	0.000993214	0.000787572	0.000966344	0.000946721	0.000898634	0.000844044	0.0009027	0.000882868	0.000918848	0.000919055	0.000964337	0.000903835	0.00088007	[EC:2.6.1.-]	0.799261	0.946235
K00839	1.61e-05	1.96e-05	2e-05	6.03e-05	0.000210578	4.18e-05	4.1e-05	2.56e-05	8.65e-05	8.17e-05	0.000124587	0.000168853	6.2e-05	2.11e-05	2.27e-05	2.79e-05	3.69e-05	0.00011159	2.56e-05	3.67e-05	2.55e-05	7.55e-05	5.9e-05	7.57e-05	0.000118993	7.16e-05	aminotransferase [EC:2.6.1.-]	0.0180541	0.0272965
K00840	3.34e-05	3.98e-05	3.94e-05	2.62e-05	3.4e-05	4.7e-05	4.18e-05	3.96e-05	2.3e-05	2.68e-05	2.7e-05	2.82e-05	2.71e-05	4.43e-05	5.42e-05	5.05e-05	4.86e-05	3.6e-05	4.14e-05	4.66e-05	4.16e-05	3.49e-05	3.8e-05	3.76e-05	3.73e-05	3.51e-05	succinylornithine aminotransferase [EC:2.6.1.81]	0.212867	0.00523274
K00841	1.41e-05	1.99e-05	2.21e-05	1.95e-05	1.2e-05	2.08e-05	2.13e-05	1.85e-05	1.1e-05	1.18e-05	1.24e-05	1.16e-05	1.92e-05	1.66e-05	2.14e-05	2.01e-05	1.97e-05	1.41e-05	2.33e-05	1.9e-05	1.95e-05	1.46e-05	1.63e-05	1.54e-05	1.43e-05	2.06e-05	aminotransferase [EC:2.6.1.-]	0.0277243	0.0775515
K00842	2.74e-08	6.51e-09	5.87e-09	1.81e-08	1.67e-08	1.38e-08	1.36e-08	2.54e-08	2.83e-08	8.25e-08	4.71e-08	2.14e-08	2.57e-08	5.37e-08	2.4e-08	4.53e-09	4.71e-10	9.65e-09	7.78e-09	1.37e-08	1.23e-08	2.35e-08	7.57e-08	2.02e-08	1.03e-08	2.75e-08	aminotransferase [EC:2.6.1.-]	0.0293651	0.424089
K00843	9.24e-08	3.98e-08	8.89e-08	1.2e-07	3.89e-08	1.94e-07	6.12e-08	7.16e-08	3.48e-08	5.31e-08	1.62e-07	4.58e-08	1.19e-07	1.54e-07	3.63e-07	1.64e-07	7.02e-08	3.9e-08	1.36e-07	5.64e-08	5.83e-08	7.03e-08	1.72e-07	1.12e-07	5.6e-08	2.15e-07	[EC:2.6.-.-]	0.917467	0.550923
K00844	7.62e-10	7.08e-11	1.5e-10	4.85e-08	0	7.44e-11	2.29e-08	1.23e-08	1.41e-10	8.19e-10	3.73e-08	1.41e-08	3.7e-08	1.17e-09	1.77e-08	0	0	4.14e-08	7.56e-10	4.74e-08	2.63e-09	9.02e-08	4.23e-08	6.59e-08	1.45e-07	3.23e-07	hexokinase [EC:2.7.1.1]	0.826496	0.0402937
K00845	0.000421801	0.000367567	0.000387259	0.000503981	0.000673018	0.000420528	0.000442478	0.000394654	0.000506843	0.000533086	0.000585715	0.000612263	0.000494295	0.000479099	0.000466758	0.000460664	0.000474925	0.000594962	0.000449589	0.000480299	0.000441699	0.00053272	0.000525677	0.00056165	0.00061251	0.000557814	glucokinase [EC:2.7.1.2]	0.0186499	0.0296014
K00846	1.99e-07	1.7e-08	2.27e-08	5.96e-07	1.42e-07	7.46e-08	3.04e-08	2.64e-07	4.62e-08	5.39e-08	1.9e-07	7.77e-08	4.82e-07	2.38e-07	1.34e-06	2.08e-08	8.04e-09	3.92e-08	1.02e-07	4.58e-08	8.63e-08	2.32e-08	5.25e-08	1.04e-07	5.84e-08	7.36e-07	ketohexokinase [EC:2.7.1.3]	0.321984	0.739183
K00847	0.000713974	0.000506648	0.000561421	0.000810926	0.000983196	0.00051936	0.000594091	0.000560609	0.000892911	0.00091684	0.00094728	0.000937679	0.000781804	0.000718012	0.000536151	0.000591928	0.00062267	0.000861003	0.000567277	0.000608782	0.000592927	0.00079175	0.000764992	0.000848641	0.000878796	0.000769242	fructokinase [EC:2.7.1.4]	0.0202643	0.0150581
K00848	1.37e-06	1.44e-06	2.08e-06	2.72e-06	2.72e-06	1.48e-06	1.52e-06	1.95e-06	1.17e-06	3.15e-06	3.07e-06	2.68e-06	1.94e-06	5.02e-07	2.23e-06	9.37e-07	7.17e-07	1.89e-06	4.29e-07	6.03e-07	4.33e-07	1.42e-06	1.42e-06	1.63e-06	2.27e-06	2.49e-06	rhamnulokinase [EC:2.7.1.5]	0.331139	0.254825
K00849	0.000127056	6.7e-05	9.57e-05	0.000158993	8.42e-05	9.8e-05	0.000102628	9.02e-05	0.000151295	0.000160356	0.000139295	0.000105436	0.000148382	0.000127708	0.0001279	9.07e-05	8.41e-05	0.000121455	0.00013203	9.1e-05	0.000109021	0.000130959	0.000144439	0.000131205	0.00011007	0.000138614	galactokinase [EC:2.7.1.6]	0.438697	0.0893125
K00850	0.000217771	0.000315803	0.000328481	0.000247078	0.000160995	0.000346254	0.000274394	0.000316828	0.000211062	0.000184695	0.00016651	0.000198657	0.000271775	0.000232058	0.000333613	0.000313805	0.00029215	0.000209523	0.000359023	0.000300867	0.000328432	0.000261682	0.000271324	0.000175554	0.00017895	0.000245023	6-phosphofructokinase [EC:2.7.1.11]	0.0270661	0.0327794
K00851	0.000118044	8.42e-05	9.2e-05	0.000110618	8.02e-05	0.000101048	9.42e-05	9.45e-05	0.000119523	0.000128286	0.000114531	9.46e-05	0.000106588	0.000122439	0.000115517	0.000100588	0.000103622	0.000108704	9.93e-05	0.000101088	0.00010091	0.000115009	0.000120062	0.000119666	0.000109122	0.0001113	gluconokinase [EC:2.7.1.12]	0.391068	0.343081
K00852	0.000537557	0.00049394	0.000482222	0.000510834	0.000629819	0.000425366	0.000511907	0.000485125	0.000560705	0.000575198	0.000592059	0.000595685	0.000499862	0.000491205	0.000359765	0.000445927	0.000471442	0.000539563	0.000426336	0.000470228	0.00045017	0.000506713	0.000484729	0.000544489	0.000558418	0.00048155	ribokinase [EC:2.7.1.15]	0.0490045	0.0243242
K00853	4.58e-05	6.72e-05	7.68e-05	4.68e-05	2.79e-05	5.84e-05	5.23e-05	6.45e-05	3.65e-05	4.08e-05	3.45e-05	3.25e-05	4.93e-05	4.85e-05	7.16e-05	7.23e-05	7.06e-05	4.22e-05	6.43e-05	6.18e-05	6.73e-05	4.77e-05	5.36e-05	4.38e-05	3.72e-05	5.73e-05	L-ribulokinase [EC:2.7.1.16]	0.0202643	0.0155448
K00854	0.000678643	0.00065498	0.000659248	0.000608272	0.000642279	0.000543483	0.000697375	0.000633217	0.000606065	0.000638704	0.000624557	0.000603761	0.000595952	0.000619612	0.000453592	0.000599759	0.000609952	0.000622159	0.000579242	0.000610571	0.000591528	0.000598063	0.000595186	0.000638383	0.000635516	0.00057606	xylulokinase [EC:2.7.1.17]	0.239949	0.418986
K00855	4.81e-05	5.47e-05	5.38e-05	0.000127567	0.000284693	6.18e-05	7.84e-05	6.56e-05	0.00012718	0.000119351	0.000184938	0.000239363	0.000139081	7.23e-05	5.06e-05	7.97e-05	9.54e-05	0.000178757	6.9e-05	9.45e-05	8.1e-05	0.000131269	0.00010749	0.000134704	0.000191638	0.000136545	phosphoribulokinase [EC:2.7.1.19]	0.0214166	0.0184401
K00856	0.000134311	0.000149689	0.000155097	0.000160948	9.31e-05	0.000158563	0.00013603	0.000154518	0.000123198	0.000118263	0.000121879	0.000117422	0.000172742	0.000118806	0.000141462	0.000127828	0.000122555	9.85e-05	0.000128676	0.000118717	0.000126339	0.000113768	0.000119024	0.000102506	9.49e-05	0.000128242	adenosine kinase [EC:2.7.1.20]	0.165965	0.124128
K00857	0.000258524	0.000266277	0.00025699	0.000206063	0.0001431	0.000238956	0.000225275	0.000255881	0.000245411	0.000240441	0.000197367	0.000181604	0.000206983	0.000235181	0.000243378	0.000230947	0.000241872	0.000199782	0.000243658	0.000235327	0.000246806	0.000229961	0.000230884	0.000211999	0.000188279	0.000188165	thymidine kinase [EC:2.7.1.21]	0.0668754	0.0400482
K00858	0.00031207	0.000367301	0.000349447	0.000388705	0.00059772	0.00038166	0.000363758	0.000366259	0.000419033	0.000394284	0.000460128	0.000545887	0.000400026	0.000301185	0.000380121	0.000331231	0.000345454	0.000437387	0.000355181	0.000352625	0.000347279	0.000395097	0.000368165	0.000369019	0.000440049	0.000390415	NAD+ kinase [EC:2.7.1.23]	0.0183363	0.0690501
K00859	0.000292441	0.000253285	0.000255518	0.000342413	0.00037524	0.000263175	0.000266039	0.000268857	0.000349136	0.000345291	0.000367546	0.00037181	0.000340651	0.000277631	0.000278809	0.000243846	0.000245747	0.000322549	0.000257366	0.000252074	0.000256956	0.00030711	0.000299477	0.000310314	0.000322932	0.000314816	dephospho-CoA kinase [EC:2.7.1.24]	0.0181199	0.0163716
K00860	0.000231871	0.000196961	0.000192444	0.000270215	0.000358082	0.00019505	0.000231861	0.000203	0.000280721	0.000284042	0.00031562	0.000327271	0.000262336	0.00022917	0.000176559	0.000197176	0.000206243	0.000289264	0.000207228	0.000216814	0.000212181	0.000254711	0.000245461	0.000279948	0.00030034	0.000269199	adenylylsulfate kinase [EC:2.7.1.25]	0.0200245	0.00599055
K00862	6.85e-05	7.97e-05	7.96e-05	5.09e-05	3.79e-05	4.45e-05	6.71e-05	6.94e-05	3.4e-05	3.74e-05	3.49e-05	3.28e-05	4.82e-05	3.68e-05	3.24e-05	4.75e-05	3.87e-05	2.54e-05	2.94e-05	3.67e-05	3.34e-05	2.74e-05	2.99e-05	3.15e-05	2.8e-05	4.52e-05	erythritol kinase [EC:2.7.1.27]	0.0200245	0.129953
K00863	0.00015132	0.000185886	0.000181803	9.74e-05	8.67e-05	0.000118725	0.000161185	0.000162244	8.44e-05	9.63e-05	8.32e-05	7.92e-05	0.000102746	8.79e-05	7.29e-05	0.000110654	0.000103387	6.49e-05	8.15e-05	9.56e-05	9.25e-05	6.88e-05	7.61e-05	7.17e-05	6.57e-05	7.24e-05	dihydroxyacetone kinase [EC:2.7.1.29]	0.0195644	0.0201835
K00864	0.000488946	0.0003745	0.000420467	0.000483656	0.000378188	0.000395333	0.000430909	0.00040373	0.000471011	0.000502197	0.000468334	0.00039712	0.00046791	0.000496316	0.000410818	0.000443996	0.000419956	0.000467884	0.000428789	0.000418825	0.000425631	0.000469776	0.000487508	0.000495158	0.000458664	0.000471463	glycerol kinase [EC:2.7.1.30]	0.777075	0.0400482
K00865	7.23e-05	9.93e-05	0.000123011	8.25e-05	6.11e-05	0.00016021	0.000116552	0.000123209	8.4e-05	7.9e-05	5.66e-05	7.51e-05	8.19e-05	8.79e-05	0.000117234	0.000114398	0.000125788	7.54e-05	0.000169304	0.000121942	0.000139304	0.000100432	0.000110162	6.31e-05	6.63e-05	8.69e-05	glycerate kinase [EC:2.7.1.31]	0.0639091	0.0457027
K00867	2.23e-05	1.95e-05	2.55e-05	3.28e-05	1.1e-05	1.07e-05	1.35e-05	1.79e-05	7.83e-06	1.39e-05	1.7e-05	1.16e-05	2.75e-05	2.97e-05	3.55e-05	3.76e-05	2.81e-05	1.93e-05	2.23e-05	2.71e-05	2.45e-05	2.12e-05	2.52e-05	2.53e-05	2.19e-05	4.5e-05	type I pantothenate kinase [EC:2.7.1.33]	0.281265	0.161771
K00868	0.000128558	5.06e-05	6.3e-05	0.000128746	7.62e-05	7.15e-05	7.59e-05	6.92e-05	0.000128202	0.000143094	0.000132001	9.18e-05	0.000115783	0.000124739	8.84e-05	7.19e-05	6.6e-05	0.000104216	6.51e-05	6.82e-05	6.87e-05	0.000103538	0.000111501	0.000128558	0.000109197	0.000116798	pyridoxine kinase [EC:2.7.1.35]	0.11825	0.0671996
K00869	0.000139856	0.000238166	0.000222742	0.000100587	7.18e-05	0.000216896	0.000161474	0.000212567	0.000134166	0.000105176	7.23e-05	0.000100979	0.000113875	0.000123008	0.000225419	0.000187159	0.000188027	0.000103978	0.000212312	0.000181213	0.000199733	0.000143677	0.000141723	8.64e-05	7.95e-05	0.000103528	mevalonate kinase [EC:2.7.1.36]	0.0264229	0.0272965
K00870	7.51e-06	7.91e-06	7.7e-06	2.84e-05	9.96e-05	1.48e-05	1.72e-05	1.08e-05	4.07e-05	3.95e-05	5.96e-05	8.01e-05	2.91e-05	1.2e-05	9.65e-06	1.48e-05	2.01e-05	5.94e-05	1.34e-05	2.02e-05	1.47e-05	4.04e-05	3.17e-05	4.05e-05	6.39e-05	3.79e-05	protein kinase [EC:2.7.1.37]	0.0181199	0.0205849
K00872	7.21e-05	0.000108483	0.000138684	0.00014846	0.000316308	0.000167413	0.000130039	0.000128918	0.000186077	0.00016684	0.000200734	0.000278441	0.000155312	7.85e-05	0.000119631	0.00012131	0.000136629	0.00019629	0.000159526	0.000128558	0.000136009	0.000172168	0.000155723	0.000132236	0.000188469	0.000155852	homoserine kinase [EC:2.7.1.39]	0.0242086	0.0671996
K00873	0.000655112	0.000679073	0.000677151	0.000767311	0.000949121	0.000725936	0.000702666	0.000698724	0.000788484	0.000767997	0.000834154	0.000912161	0.00078599	0.000660042	0.000700036	0.000677919	0.00068421	0.000803722	0.000719887	0.00069942	0.000699129	0.000766474	0.00074311	0.000732606	0.000800544	0.000761763	pyruvate kinase [EC:2.7.1.40]	0.0180541	0.0205849
K00874	0.000533247	0.00040801	0.000432658	0.000521842	0.000312907	0.000427695	0.000454296	0.000433801	0.000529651	0.000535378	0.000473748	0.000383588	0.000492032	0.000491278	0.000396321	0.000386571	0.000379265	0.000423353	0.000475548	0.000410242	0.000447146	0.000457622	0.000474131	0.000479383	0.000413096	0.000465099	2-dehydro-3-deoxygluconokinase [EC:2.7.1.45]	0.867258	0.079429
K00875	6.1e-05	6.98e-05	7.02e-05	4.8e-05	3.22e-05	3.83e-05	5.64e-05	5.96e-05	2.93e-05	3.33e-05	3.17e-05	2.82e-05	4.51e-05	8.03e-05	5.52e-05	9.6e-05	9.07e-05	5.85e-05	6.83e-05	8.75e-05	8.03e-05	6.1e-05	6.25e-05	6.82e-05	6.21e-05	7.03e-05	D-ribulokinase [EC:2.7.1.47]	0.0183363	0.194042
K00876	5.94e-05	9.2e-05	0.000101497	8.62e-05	0.000160065	0.000102237	8.01e-05	9.42e-05	0.000108064	9.75e-05	0.000106423	0.000144771	9.39e-05	6.9e-05	0.000114017	0.000100939	0.000104516	0.000112701	0.000103619	9.34e-05	9.57e-05	0.000108765	0.000100415	7.9e-05	0.000102627	9.2e-05	uridine kinase [EC:2.7.1.48]	0.0747107	0.587838
K00878	4.77e-05	6.24e-05	5.87e-05	2.79e-05	2.75e-05	4.14e-05	5.22e-05	5.42e-05	2.8e-05	3.08e-05	2.57e-05	2.5e-05	3.02e-05	4.4e-05	3.23e-05	5.29e-05	5.58e-05	3.46e-05	4.39e-05	5.19e-05	4.96e-05	3.58e-05	3.63e-05	3.73e-05	3.43e-05	2.79e-05	hydroxyethylthiazole kinase [EC:2.7.1.50]	0.0277243	0.147322
K00879	7.5e-09	1.23e-08	9.75e-09	4.01e-08	2.73e-08	1.8e-08	3.39e-08	7.47e-08	1.34e-08	9.47e-07	1.65e-08	1.82e-08	1.75e-08	6.43e-08	2.35e-07	1.92e-08	2.29e-08	3.12e-08	5.6e-08	1.09e-08	1.02e-08	1.75e-08	4.49e-08	3.79e-08	3e-08	7.1e-08	L-fuculokinase [EC:2.7.1.51]	0.638201	0.840905
K00880	2e-05	2.22e-05	2.36e-05	1.74e-05	1.06e-05	1.51e-05	1.89e-05	1.98e-05	9.4e-06	1.2e-05	1.11e-05	9.57e-06	1.6e-05	2.54e-05	2.1e-05	3.15e-05	2.82e-05	1.81e-05	2.14e-05	2.67e-05	2.43e-05	1.93e-05	2e-05	2.19e-05	1.96e-05	2.61e-05	L-xylulokinase [EC:2.7.1.53]	0.0183363	0.116339
K00881	1.01e-07	6.65e-08	1.24e-07	2.06e-07	1.86e-08	3.35e-08	2.44e-08	5.91e-08	1.48e-08	3.27e-07	7.25e-08	3e-08	1.67e-07	1.03e-07	2.35e-07	1.51e-07	3.93e-08	4.53e-08	4.86e-08	4.74e-08	4.44e-08	5.56e-08	8.35e-08	1.08e-07	5.47e-08	4.33e-07	allose kinase [EC:2.7.1.55]	0.715864	0.946235
K00882	4.68e-05	5.26e-05	5.92e-05	4.8e-05	2.79e-05	6.59e-05	7.13e-05	5.6e-05	2.72e-05	3.45e-05	2.99e-05	2.57e-05	4.68e-05	7.09e-05	5.2e-05	7.98e-05	7.66e-05	5e-05	9.14e-05	8.12e-05	8.31e-05	5.38e-05	6.18e-05	5.4e-05	4.99e-05	5.61e-05	1-phosphofructokinase [EC:2.7.1.56]	0.0349607	0.226707
K00883	0.000140555	0.000174584	0.000173014	8.97e-05	7.94e-05	0.00012625	0.000152467	0.000153554	8.33e-05	8.74e-05	7.32e-05	7.26e-05	9.22e-05	0.000162258	0.000122691	0.000205151	0.00019908	0.000127215	0.000159401	0.000188169	0.000175841	0.000139737	0.000138343	0.000134968	0.000126243	0.000115706	2-dehydro-3-deoxygalactonokinase [EC:2.7.1.58]	0.0183363	0.111642
K00884	4.02e-05	4.55e-05	4.7e-05	3.62e-05	2.12e-05	2.82e-05	3.7e-05	3.94e-05	1.91e-05	2.27e-05	2.22e-05	1.93e-05	3.36e-05	5.26e-05	4.38e-05	6.33e-05	5.64e-05	3.68e-05	4.41e-05	5.48e-05	4.98e-05	3.89e-05	4.15e-05	4.4e-05	3.94e-05	5.29e-05	N-acetylglucosamine kinase [EC:2.7.1.59]	0.0183363	0.0851082
K00885	4.85e-06	5.12e-06	5.65e-06	4.84e-06	2.51e-06	2.79e-06	3.9e-06	4.5e-06	2.05e-06	3.04e-06	2.6e-06	2.22e-06	4.18e-06	6.45e-06	5.56e-06	7.81e-06	6.64e-06	4.46e-06	5.19e-06	6.5e-06	6e-06	4.72e-06	5.12e-06	5.41e-06	4.86e-06	7.04e-06	N-acylmannosamine kinase [EC:2.7.1.60]	0.0202643	0.111642
K00886	2.64e-05	3.65e-05	4.94e-05	3.63e-05	2.4e-05	4.25e-05	3.45e-05	3.89e-05	3.19e-05	3.16e-05	2.66e-05	2.79e-05	3.88e-05	3.18e-05	5.36e-05	5.28e-05	4.39e-05	3.54e-05	5.53e-05	4.25e-05	4.76e-05	4.45e-05	4.82e-05	2.81e-05	2.52e-05	4.04e-05	polyphosphate glucokinase [EC:2.7.1.63]	0.123363	0.137092
K00887	2.88e-09	1.75e-09	1.12e-09	1.89e-08	1.26e-09	7.16e-09	2.13e-09	2.04e-09	2.14e-09	9.48e-09	3.71e-09	1.51e-09	1.19e-08	1.84e-08	2.47e-08	7.6e-09	0	3.37e-09	1.36e-08	4.56e-09	5.59e-09	7.01e-09	2.28e-08	6.74e-09	3.03e-09	1.07e-08	undecaprenol kinase [EC:2.7.1.66]	0.669471	0.716646
K00891	0.000282553	0.000275528	0.000285976	0.000329485	0.000345224	0.000285391	0.000291035	0.000288274	0.000321243	0.000316311	0.00032853	0.000341405	0.000330337	0.000280638	0.000265306	0.000273219	0.000281244	0.000312393	0.000300005	0.000282618	0.000290934	0.000306609	0.000301742	0.000298745	0.000311015	0.000309069	shikimate kinase [EC:2.7.1.71]	0.0390726	0.0110106
K00892	3.62e-07	5.12e-07	2.33e-07	2.08e-07	3.5e-07	1.85e-07	5.03e-07	9.09e-07	2.17e-07	1.58e-06	5.19e-07	2.82e-07	1.81e-07	1.6e-06	6.04e-06	1.18e-07	5.81e-07	2.53e-07	8.08e-07	1.67e-07	3.97e-07	5.19e-07	7.72e-07	3.42e-07	5.19e-07	5.38e-07	inosine kinase [EC:2.7.1.73]	0.90205	0.623551
K00895	8.66e-06	1.27e-05	2.27e-05	4.43e-05	5.95e-06	3.47e-05	4.46e-05	2.19e-05	5.87e-06	7.61e-06	1.02e-05	6.88e-06	4.03e-05	1.56e-05	2.31e-05	1.22e-05	1.02e-05	8.74e-06	6.1e-05	2.4e-05	3.53e-05	8.31e-06	1.81e-05	1.12e-05	7.43e-06	4.05e-05	pyrophosphate--fructose-6-phosphate 1-phosphotransferase [EC:2.7.1.90]	0.156788	0.608793
K00897	1.26e-06	8.77e-07	1.84e-06	1.94e-06	5.56e-07	3e-06	1.21e-06	1.44e-06	3.24e-07	6.97e-07	1.08e-06	6.3e-07	1.61e-06	1.23e-06	3.21e-06	2.3e-06	7.04e-07	5.3e-07	1.07e-06	6.52e-07	5.34e-07	6.43e-07	1.24e-06	1.07e-06	6.97e-07	3.21e-06	aminoglycoside 3'-phosphotransferase [EC:2.7.1.95]	0.188722	0.42988
K00899	0.000120273	0.000170847	0.000133202	6.43e-05	5.2e-05	0.000107628	0.00012587	0.000140406	7.34e-05	5.9e-05	5.31e-05	5.6e-05	6.72e-05	7.42e-05	7.6e-05	9.75e-05	8.32e-05	5.53e-05	9.6e-05	0.000102848	0.000106778	7.22e-05	6.76e-05	5.85e-05	4.97e-05	6.89e-05	5-methylthioribose kinase [EC:2.7.1.100]	0.0195644	0.0311764
K00901	0.00013462	7.51e-05	8.36e-05	0.000168703	0.000171705	0.000113116	0.000104576	9.19e-05	0.000178611	0.000182133	0.000190874	0.000176548	0.000163615	0.000130634	0.00013366	8.84e-05	8.2e-05	0.00015918	0.000102138	9.08e-05	9.38e-05	0.000146731	0.000147213	0.000157605	0.000158763	0.00015623	diacylglycerol kinase [EC:2.7.1.107]	0.0183363	0.0134186
K00903	0.000193396	0.000288682	0.000287148	0.000157102	0.000159076	0.000298769	0.000226705	0.000269281	0.000184629	0.000166819	0.000142512	0.000175054	0.000175741	0.000229284	0.000293362	0.000305994	0.000298341	0.000207337	0.000297667	0.000282861	0.000290798	0.000234112	0.000236579	0.000185622	0.000187923	0.000191186	protein-tyrosine kinase [EC:2.7.10.-]	0.055932	0.0127663
K00906	6.5e-06	1.26e-06	1.03e-05	2.72e-06	4.78e-06	6e-05	1.73e-05	1.27e-05	3.35e-06	7.21e-06	8.17e-06	4.67e-06	3.45e-06	1.36e-05	3.55e-05	1.82e-05	4.33e-06	3e-06	1.41e-05	4.12e-06	4.28e-06	4.11e-06	1.21e-05	4.48e-06	2.72e-06	7.79e-06	isocitrate dehydrogenase kinase/phosphatase [EC:2.7.11.5 3.1.3.-]	0.99272	0.157567
K00908	2.53e-05	3.53e-05	2.2e-05	7.25e-05	0.000219441	4.53e-05	4.65e-05	3.67e-05	9.69e-05	8.28e-05	0.000132454	0.000179497	7.4e-05	1.78e-05	3.28e-05	1.89e-05	2.52e-05	0.000148059	2.63e-05	3.81e-05	2.63e-05	9.97e-05	7.93e-05	9.46e-05	0.000159202	0.000132166	Ca2+/calmodulin-dependent protein kinase [EC:2.7.11.17]	0.0180541	0.0236379
K00912	0.000441432	0.000435704	0.000433436	0.000429718	0.000246242	0.000425264	0.000413253	0.000436667	0.000396222	0.000387123	0.000346584	0.000303367	0.000429904	0.000423948	0.000427807	0.000398137	0.000397059	0.000334851	0.00043971	0.000403714	0.000427258	0.000376485	0.000390216	0.000367307	0.000322524	0.000380691	tetraacyldisaccharide 4'-kinase [EC:2.7.1.130]	0.0504528	0.035319
K00917	2.31e-05	2.54e-05	2.69e-05	1.64e-05	1.23e-05	2.44e-05	2.38e-05	2.37e-05	1.36e-05	1.63e-05	1.29e-05	1.18e-05	1.63e-05	3.74e-05	3.1e-05	4.46e-05	4.04e-05	2.75e-05	3.57e-05	4.03e-05	3.76e-05	3.18e-05	3.32e-05	2.95e-05	2.72e-05	2.8e-05	tagatose 6-phosphate kinase [EC:2.7.1.144]	0.0180133	0.0311764
K00918	1.9e-09	3.44e-09	3.55e-09	3.88e-08	3.16e-09	2.26e-09	2.37e-09	7.24e-09	4.21e-09	9.26e-09	1.85e-08	6.55e-09	3.38e-08	5.8e-09	5.25e-08	3.97e-09	2.62e-09	1.02e-08	9.52e-09	1.03e-08	7.19e-09	1.2e-08	2.24e-08	1.92e-08	1.25e-08	6.63e-08	ADP-dependent phosphofructokinase/glucokinase [EC:2.7.1.146 2.7.1.147]	0.41168	0.176601
K00919	0.000244245	0.000160092	0.000171926	0.000348112	0.000435273	0.000199448	0.000238541	0.000195028	0.000324308	0.000336872	0.000393627	0.000400679	0.000341653	0.000253713	0.00022889	0.00018669	0.000206359	0.000326708	0.000200719	0.000212116	0.000199364	0.000277886	0.000270755	0.000315498	0.000346286	0.000313346	4-diphosphocytidyl-2-C-methyl-D-erythritol kinase [EC:2.7.1.148]	0.0259887	0.0205849
K00924	0.00016063	0.000227116	0.000218598	0.000152305	0.000193591	0.000208286	0.00020223	0.000210148	0.000152949	0.000143689	0.000150494	0.000179475	0.000159675	0.000147272	0.000178563	0.000191523	0.000193879	0.00018292	0.000194221	0.000190783	0.000187645	0.000177733	0.000169591	0.000161254	0.000182917	0.000189748	[EC:2.7.1.-]	0.0747107	0.244515
K00925	0.000164976	0.000194267	0.000204226	0.000156677	0.000157952	0.000180389	0.000210523	0.000190697	0.000120042	0.000135341	0.000130107	0.000137646	0.000158065	0.000199551	0.000197486	0.000229867	0.000221501	0.000182801	0.00023153	0.000228607	0.000224446	0.000181725	0.000197085	0.000178227	0.000182081	0.000189427	acetate kinase [EC:2.7.2.1]	0.0293651	0.022428
K00926	2.67e-05	3.6e-05	3.95e-05	1.75e-05	1.7e-05	4.5e-05	2.99e-05	4.1e-05	2.61e-05	2.62e-05	1.57e-05	2.23e-05	1.81e-05	2.5e-05	3.59e-05	3.22e-05	3.91e-05	1.81e-05	3.72e-05	3.29e-05	3.57e-05	2.51e-05	2.74e-05	1.69e-05	1.78e-05	1.7e-05	carbamate kinase [EC:2.7.2.2]	0.0531258	0.0195548
K00927	0.000526179	0.000545593	0.000541976	0.000614628	0.000702381	0.000556667	0.000542735	0.000553322	0.000609861	0.000593976	0.000639228	0.000684584	0.00062639	0.000511312	0.00056266	0.000517088	0.000524121	0.000595154	0.000540094	0.000526659	0.000532942	0.000572316	0.000558075	0.000555117	0.000593576	0.000582033	phosphoglycerate kinase [EC:2.7.2.3]	0.0204235	0.0541376
K00928	0.000645412	0.000726082	0.000767332	0.000778665	0.000994687	0.000746247	0.000695241	0.00074632	0.000829602	0.000780439	0.000829369	0.000957777	0.00080243	0.000652783	0.000770002	0.000726633	0.000755936	0.000814295	0.000759842	0.000724567	0.000745772	0.00079524	0.000759666	0.000712116	0.000793006	0.000759075	aspartate kinase [EC:2.7.2.4]	0.0235099	0.519319
K00929	2.37e-05	2.97e-05	2.72e-05	1.25e-05	1.36e-05	1.7e-05	2.68e-05	2.59e-05	1.32e-05	1.38e-05	1.17e-05	1.17e-05	1.34e-05	1.12e-05	7.8e-06	1.3e-05	1.42e-05	8.67e-06	1.05e-05	1.33e-05	1.21e-05	8.88e-06	8.16e-06	9.4e-06	8.97e-06	7.03e-06	butyrate kinase [EC:2.7.2.7]	0.0381699	0.137092
K00930	0.000393497	0.000340132	0.000355296	0.000464004	0.000524511	0.000369243	0.000373176	0.000367315	0.000467738	0.00046248	0.000499005	0.000512796	0.000461157	0.000387151	0.000349091	0.000349567	0.000357211	0.000445532	0.000360316	0.000362856	0.000365053	0.000421193	0.000406677	0.000431564	0.000454409	0.00043459	acetylglutamate kinase [EC:2.7.2.8]	0.02204	0.00576849
K00931	0.000399059	0.000343677	0.000349166	0.000476047	0.000549415	0.000366839	0.000382721	0.00036841	0.000472728	0.00046721	0.000511783	0.000527316	0.000470569	0.000380881	0.000316884	0.0003355	0.000338025	0.000451375	0.000357637	0.000356945	0.000358052	0.000424086	0.000410623	0.000435799	0.000463249	0.000447961	glutamate 5-kinase [EC:2.7.2.11]	0.0264229	0.00545091
K00932	2.41e-06	2.61e-06	4.05e-06	6.26e-06	1.43e-06	4.62e-06	7.09e-06	3.38e-06	1.28e-06	2.39e-06	1.58e-06	1.18e-06	5.56e-06	6.03e-06	3.14e-06	5.15e-06	5.04e-06	3.41e-06	1.08e-05	6.71e-06	8e-06	3.4e-06	4.81e-06	3.99e-06	3.44e-06	6.47e-06	propionate kinase [EC:2.7.2.15]	0.123363	0.653193
K00933	0	0	1.81e-08	0	0	0	7.52e-08	6.12e-08	0	0	0	0	0	2.61e-08	4.5e-07	2.42e-07	2.57e-07	0	1.55e-07	1.32e-07	1.35e-08	2.94e-09	0	0	0	0	creatine kinase [EC:2.7.3.2]	0.291727	0.00523274
K00934	0	7.27e-11	0	0	0	0	0	2.01e-11	0	0	0	0	0	5.54e-11	0	0	0	0	3.9e-11	2.85e-11	0	0	0	0	0	0	arginine kinase [EC:2.7.3.3]	0.389723	0.449499
K00936	0.0050076	0.00690852	0.00683085	0.00463558	0.00513446	0.00674159	0.00617544	0.00653094	0.00466859	0.00420278	0.00420014	0.00498316	0.00490078	0.00522388	0.00652118	0.00679947	0.00660994	0.00532988	0.00685741	0.00658934	0.00669834	0.00560565	0.00556107	0.00481734	0.0050788	0.00548986	[EC:2.7.3.-]	0.0517478	0.0541376
K00937	0.000998931	0.00131087	0.00132811	0.00106003	0.00136112	0.00130248	0.00120253	0.00127897	0.00114252	0.00105878	0.0010839	0.00130801	0.00110931	0.000979676	0.00112879	0.00121575	0.00127268	0.00115747	0.00129509	0.00122023	0.00125822	0.00116646	0.00113333	0.00101812	0.00111879	0.00108051	polyphosphate kinase [EC:2.7.4.1]	0.72764	0.26269
K00938	1.2e-07	1.08e-07	6.11e-09	5.31e-07	9.61e-08	2.58e-08	1.32e-07	6.55e-08	2.79e-08	1.14e-07	1.72e-07	7.38e-08	3.49e-07	1.49e-07	1.53e-06	3.17e-08	2.95e-07	7.6e-08	7.54e-08	5.51e-08	5.18e-08	1.47e-07	2.42e-07	1.56e-07	2.14e-07	1.21e-06	phosphomevalonate kinase [EC:2.7.4.2]	0.738549	0.771604
K00939	0.00056491	0.000438689	0.000469746	0.00060711	0.000511077	0.000474622	0.000493481	0.000483628	0.000622702	0.000632924	0.000602263	0.000555629	0.000592349	0.000552865	0.000502097	0.000450432	0.000475756	0.000547629	0.000517028	0.000479509	0.000499709	0.000556855	0.00056253	0.000566981	0.000544683	0.000538096	adenylate kinase [EC:2.7.4.3]	0.0970362	0.0172019
K00940	0.000193675	0.000192485	0.000194849	0.000236147	0.000259122	0.000202992	0.000200962	0.000200228	0.000227077	0.000219848	0.000238857	0.000253486	0.000238185	0.000194336	0.000206705	0.000188595	0.000193211	0.00022069	0.000205973	0.000196158	0.000200163	0.000212555	0.000207745	0.000208131	0.000220609	0.000221316	nucleoside-diphosphate kinase [EC:2.7.4.6]	0.0189877	0.0134186
K00941	0.000307903	0.000216805	0.000241462	0.000352954	0.000308696	0.000266622	0.000264801	0.000251263	0.000341903	0.000356946	0.000354297	0.000326634	0.000346577	0.00029566	0.000297189	0.000228215	0.000233214	0.000293356	0.000252169	0.000234122	0.000239829	0.00029163	0.000302708	0.000303602	0.000296166	0.000302945	hydroxymethylpyrimidine/phosphomethylpyrimidine kinase [EC:2.7.1.49 2.7.4.7]	0.0381699	0.0580741
K00942	0.00032388	0.000292004	0.000295973	0.000372738	0.000389739	0.000303875	0.000315267	0.000304771	0.000365308	0.000366161	0.000381322	0.000383966	0.000370791	0.000316904	0.000333025	0.000286607	0.000288709	0.000347161	0.000313136	0.000297413	0.000304094	0.00033376	0.000333761	0.000338412	0.000347902	0.000347276	guanylate kinase [EC:2.7.4.8]	0.0245663	0.0172019
K00943	0.000233923	0.00014495	0.000160343	0.000300268	0.000313003	0.000168823	0.000202909	0.000174485	0.000274193	0.000292917	0.000322967	0.000303839	0.000291743	0.000231261	0.000185286	0.000163874	0.000172272	0.000262936	0.00016717	0.000176292	0.000171286	0.000232863	0.000232394	0.000269237	0.00027859	0.000265804	dTMP kinase [EC:2.7.4.9]	0.0204235	0.0195548
K00945	0.000256915	0.000281227	0.00028247	0.000316716	0.000372296	0.000296774	0.000284472	0.000289743	0.000306753	0.000295611	0.000323744	0.000359245	0.000324179	0.000254955	0.000297276	0.00026781	0.00027447	0.00030009	0.000292211	0.000275857	0.000282837	0.000289909	0.000285604	0.000273943	0.000297751	0.000298362	cytidylate kinase [EC:2.7.4.14]	0.0231784	0.266994
K00946	0.000182414	0.000284313	0.000279568	0.000290557	0.000434512	0.000343324	0.000273836	0.000291327	0.000292847	0.00025406	0.000311294	0.000405812	0.000312381	0.000170484	0.000321241	0.000235173	0.000236408	0.000274027	0.000297688	0.00024506	0.000262521	0.000262826	0.000249282	0.000201919	0.000259876	0.000270001	thiamine-monophosphate kinase [EC:2.7.4.16]	0.0993311	0.811398
K00947	8.14e-05	0.000118112	0.000135565	9.71e-05	0.000114376	0.000154114	0.000112484	0.000132557	0.000110516	9.81e-05	8.8e-05	0.000116947	0.000107461	8.1e-05	0.000124499	0.000115067	0.000123852	0.000102486	0.000140731	0.000112814	0.000122818	0.000115193	0.00011601	8.09e-05	9.16e-05	9.91e-05	[EC:2.7.4.-]	0.370923	0.150075
K00948	0.000440493	0.000455643	0.000467196	0.000494244	0.000532533	0.000474725	0.000451163	0.000464266	0.000491385	0.000480499	0.000494784	0.000526522	0.000501406	0.000446837	0.00047596	0.000462526	0.000457325	0.000484545	0.000481198	0.000461204	0.000469288	0.000484182	0.000480244	0.000453866	0.000475629	0.000481508	ribose-phosphate pyrophosphokinase [EC:2.7.6.1]	0.0320055	0.255192
K00949	0.000115765	0.000121135	0.000123555	9.03e-05	6.44e-05	8.02e-05	0.000100024	0.000106812	8.42e-05	8.94e-05	7.86e-05	6.66e-05	8.95e-05	0.000132579	8.39e-05	0.000143505	0.00013453	0.000105773	0.000113504	0.000128856	0.000123999	0.000110058	0.000107412	0.000114632	0.00010525	0.0001	thiamine pyrophosphokinase [EC:2.7.6.2]	0.0181199	0.223291
K00950	0.000168955	0.000203541	0.000195049	0.000202097	0.000221869	0.000218125	0.000197291	0.000205738	0.000188896	0.000174413	0.000197437	0.000220003	0.000211864	0.000156635	0.000207133	0.000173433	0.000172833	0.000178247	0.00019092	0.000177639	0.000183582	0.000177031	0.000171622	0.000160701	0.000175059	0.000182509	2-amino-4-hydroxy-6-hydroxymethyldihydropteridine diphosphokinase [EC:2.7.6.3]	0.587963	0.739183
K00951	0.00103835	0.000991235	0.000989225	0.00113121	0.00123253	0.00109082	0.000980952	0.00103809	0.00118296	0.00115836	0.00120909	0.00124283	0.00114734	0.000995822	0.00111973	0.000942204	0.000953911	0.00109982	0.000953948	0.000947369	0.000954688	0.00107799	0.00105912	0.0010532	0.00109305	0.00106729	GTP pyrophosphokinase [EC:2.7.6.5]	0.0180541	0.187863
K00952	7.77e-08	2.45e-08	1.03e-07	1.09e-06	4.31e-06	8.21e-07	6.07e-07	3.18e-07	1.66e-06	1.54e-06	2.45e-06	3.39e-06	1.11e-06	1.46e-07	4.29e-07	2.18e-07	4.25e-07	2.55e-06	3.04e-07	4.15e-07	1.8e-07	1.62e-06	1.25e-06	1.57e-06	2.7e-06	1.53e-06	nicotinamide-nucleotide adenylyltransferase [EC:2.7.7.1]	0.0180133	0.0515087
K00954	0.000193744	0.000190871	0.000195259	0.000222904	0.000224304	0.000196888	0.000196952	0.000198067	0.00021281	0.000211123	0.000218485	0.000224368	0.00022565	0.000198592	0.000213007	0.000194486	0.000203171	0.000210022	0.000202314	0.000198662	0.000199692	0.000207257	0.000205528	0.000203186	0.000209776	0.000206558	pantetheine-phosphate adenylyltransferase [EC:2.7.7.3]	0.0309399	0.241023
K00955	0.000488901	0.000336934	0.000335421	0.00051452	0.000329099	0.000408908	0.000390339	0.000373873	0.00050257	0.000513996	0.000487343	0.000392164	0.000487784	0.000447579	0.000445378	0.000314993	0.000300072	0.000399148	0.000383123	0.000338902	0.000363616	0.000413009	0.000441078	0.000457397	0.000398802	0.000478544	bifunctional enzyme CysN/CysC [EC:2.7.7.4 2.7.1.25]	0.733241	0.104397
K00956	0.000397417	0.00034917	0.000361017	0.000401941	0.000218909	0.000416952	0.000354783	0.000372663	0.000404983	0.000395847	0.000341556	0.000291823	0.000393401	0.000366318	0.000456958	0.000316867	0.000312241	0.000302624	0.000402471	0.000330034	0.000365204	0.000348333	0.00037729	0.000335423	0.000281996	0.000373302	sulfate adenylyltransferase subunit 1 [EC:2.7.7.4]	0.656436	0.811398
K00957	0.000315451	0.000266889	0.00027101	0.000315751	0.000171628	0.000318714	0.000273876	0.00028386	0.000318711	0.000314456	0.00027501	0.000228944	0.000306447	0.000289448	0.000352524	0.000241422	0.000234605	0.000238302	0.000305278	0.000252895	0.000277834	0.000272306	0.000294682	0.000267854	0.000224966	0.000293641	sulfate adenylyltransferase subunit 2 [EC:2.7.7.4]	0.982405	0.902021
K00958	0.000257662	0.000296621	0.000276893	0.000314592	0.000562	0.00022246	0.000309499	0.000285396	0.000329745	0.000321687	0.000405838	0.000486453	0.000333103	0.000255813	0.000170236	0.00027504	0.000317144	0.000397704	0.000233913	0.00030394	0.000273054	0.000327327	0.000283037	0.000342737	0.000420786	0.000300848	sulfate adenylyltransferase [EC:2.7.7.4]	0.0242086	0.0851082
K00960	2.37e-07	5.84e-08	3.18e-07	6.14e-08	9.27e-08	1.97e-06	5.32e-07	2.99e-07	1.36e-07	2.74e-07	3.11e-07	1.63e-07	8.59e-08	8.01e-07	1.59e-06	8.66e-07	1.54e-07	1.33e-07	7.95e-07	2.24e-07	2.47e-07	2.56e-07	7.9e-07	2.76e-07	1.14e-07	2.67e-07	DNA-directed RNA polymerase [EC:2.7.7.6]	0.958235	0.286763
K00962	0.000996697	0.00100605	0.0010164	0.00114013	0.00118178	0.00103528	0.00101865	0.0010323	0.00111302	0.00108122	0.00112973	0.00117988	0.00114977	0.000986374	0.00108529	0.000972625	0.000995732	0.0010744	0.00105471	0.00100177	0.00102745	0.00105986	0.00104319	0.00102323	0.00106423	0.00107765	polyribonucleotide nucleotidyltransferase [EC:2.7.7.8]	0.0312238	0.278561
K00963	0.000265355	0.000179	0.000195566	0.000285821	0.000162139	0.000194055	0.000216388	0.000203577	0.000224806	0.000250182	0.000246425	0.000184241	0.000278152	0.000277772	0.000198294	0.000216544	0.000212131	0.000215774	0.000196419	0.000209858	0.00020766	0.000218184	0.000234152	0.000258977	0.00022767	0.000252521	UTP--glucose-1-phosphate uridylyltransferase [EC:2.7.7.9]	0.871863	0.147322
K00965	0.000116696	5.04e-05	7e-05	0.000126644	7.77e-05	6.66e-05	6.66e-05	6.8e-05	0.000142214	0.000151474	0.000132512	9.89e-05	0.000119027	0.000109752	0.000106784	7.07e-05	6.63e-05	0.000110288	7.9e-05	6.59e-05	7.54e-05	0.000117249	0.00012356	0.000120803	0.000101919	0.000110272	UDPglucose--hexose-1-phosphate uridylyltransferase [EC:2.7.7.12]	0.0909898	0.0184401
K00966	7.97e-05	0.000108726	8.74e-05	0.000192556	0.000566568	0.000121904	0.000137548	0.000109915	0.000248101	0.000225925	0.000342929	0.000461127	0.000198904	5.74e-05	8.22e-05	7.36e-05	8.8e-05	0.000284473	7.58e-05	0.000101711	7.97e-05	0.000196202	0.000153346	0.000194838	0.000302587	0.000215954	mannose-1-phosphate guanylyltransferase [EC:2.7.7.13]	0.0181199	0.0301087
K00968	7.34e-06	9.75e-06	9.03e-06	1.24e-05	3.72e-06	6.23e-06	8.75e-06	9.88e-06	4.36e-06	3.95e-06	6.72e-06	5.93e-06	1.41e-05	7.07e-06	4.93e-06	7.3e-06	8.53e-06	4.75e-06	6.42e-06	7.82e-06	7.95e-06	5.11e-06	4.64e-06	5.74e-06	5.58e-06	7.11e-06	choline-phosphate cytidylyltransferase [EC:2.7.7.15]	0.177949	0.206358
K00969	0.00015685	0.000185843	0.00018558	0.000194202	0.000222142	0.000205756	0.000184974	0.000192073	0.000188687	0.000180884	0.000192276	0.000220166	0.000201312	0.000165917	0.00021185	0.000182415	0.000192769	0.000188963	0.000207818	0.000192379	0.000197331	0.000187809	0.000187855	0.000170405	0.000187344	0.000189021	nicotinate-nucleotide adenylyltransferase [EC:2.7.7.18]	0.239949	0.37941
K00970	0.000528131	0.000557986	0.000536375	0.000570567	0.000656239	0.000557722	0.000515027	0.000555216	0.000604297	0.000575543	0.000610554	0.000655328	0.000583118	0.000491947	0.000614473	0.000500178	0.000501909	0.00055285	0.000509073	0.000507875	0.000513996	0.000549405	0.00053199	0.000518878	0.000543059	0.000544249	poly(A) polymerase [EC:2.7.7.19]	0.0204235	0.178962
K00971	0.000562089	0.00054796	0.000550392	0.000642445	0.000799603	0.000574908	0.000568472	0.000565422	0.000672866	0.000659557	0.000710125	0.0007609	0.000644122	0.000550413	0.000554033	0.000540034	0.000549142	0.000665232	0.000556693	0.000552018	0.00054954	0.000625326	0.000603817	0.00062032	0.000668871	0.000624326	mannose-1-phosphate guanylyltransferase [EC:2.7.7.13]	0.0171139	0.0184401
K00972	6.54e-08	8.6e-09	0	2.16e-08	4.91e-09	2.63e-08	0	2.55e-08	3.95e-09	2e-08	3.12e-07	3.37e-08	8.65e-08	2.7e-07	6.78e-07	0	3.85e-10	0	1.34e-08	4.4e-08	2.34e-08	4.88e-09	6.77e-11	1.01e-07	1.78e-07	0	UDP-N-acetylglucosamine pyrophosphorylase [EC:2.7.7.23]	0.2258	0.500087
K00973	0.000382041	0.000581107	0.000542176	0.00033647	0.000420341	0.000533159	0.000457526	0.000527629	0.000395835	0.000346772	0.000334003	0.000420959	0.000371957	0.000366911	0.000518822	0.000499111	0.000503435	0.000396157	0.000506635	0.000487748	0.000499506	0.000431518	0.000415578	0.000338863	0.000363361	0.00036717	glucose-1-phosphate thymidylyltransferase [EC:2.7.7.24]	0.0783274	0.0327794
K00974	0.000347105	0.000445029	0.000444694	0.000502506	0.000790535	0.000534099	0.000455104	0.000464458	0.000553376	0.000501125	0.000588349	0.000731341	0.000529536	0.000318455	0.000469225	0.000376125	0.000394518	0.000544361	0.000465504	0.00040229	0.00041788	0.000494277	0.000459675	0.000423182	0.000531434	0.000483987	tRNA nucleotidyltransferase (CCA-adding enzyme) [EC:2.7.7.72 3.1.3.- 3.1.4.-]	0.0195644	0.0953849
K00975	0.000188601	0.000258868	0.000257005	0.00026323	0.000551885	0.000241173	0.000278775	0.000254199	0.000301134	0.000286582	0.000355607	0.000467239	0.000272937	0.000197182	0.000161318	0.00024005	0.000282	0.000360342	0.00026535	0.000277935	0.000262674	0.000298545	0.000261993	0.000283784	0.000375915	0.000288042	glucose-1-phosphate adenylyltransferase [EC:2.7.7.27]	0.0452279	0.0444791
K00978	0.00018361	9.58e-05	0.0001086	0.000218801	0.00021082	0.000112408	0.000140921	0.000113416	0.000221724	0.000230991	0.000238826	0.000211399	0.000204686	0.000182383	0.000118479	0.000117319	0.000112969	0.000202046	0.000135637	0.000129015	0.000130811	0.000181751	0.000180516	0.000212028	0.000208227	0.000204415	glucose-1-phosphate cytidylyltransferase [EC:2.7.7.33]	0.0302368	0.00742942
K00979	0.000348897	0.00037915	0.000368357	0.000349591	0.000305161	0.000364722	0.000352985	0.000371969	0.000341065	0.000324344	0.000317829	0.000321762	0.000355977	0.000337536	0.000362581	0.000346602	0.000348703	0.000330689	0.000370655	0.000354112	0.000366008	0.000342838	0.000339899	0.000324655	0.000322569	0.000338248	3-deoxy-manno-octulosonate cytidylyltransferase (CMP-KDO synthetase) [EC:2.7.7.38]	0.0277243	0.0671996
K00980	1.37e-05	1.86e-05	1.71e-05	2.14e-05	9.22e-06	1.35e-05	1.67e-05	1.87e-05	9.1e-06	9.36e-06	1.41e-05	1.27e-05	2.4e-05	1.14e-05	1.49e-05	1.23e-05	1.4e-05	8.87e-06	1.19e-05	1.36e-05	1.32e-05	9.09e-06	8.76e-06	1.01e-05	9.71e-06	1.27e-05	glycerol-3-phosphate cytidylyltransferase [EC:2.7.7.39]	0.255812	0.0327794
K00981	0.000272349	0.000290394	0.000294805	0.000317886	0.000334101	0.00030972	0.000308446	0.00029581	0.000285277	0.000283681	0.000306808	0.000321802	0.000326392	0.000288046	0.000332749	0.0003022	0.000300375	0.000314696	0.000314353	0.000303311	0.000301471	0.000301278	0.00030108	0.00029596	0.000312877	0.000315782	phosphatidate cytidylyltransferase [EC:2.7.7.41]	0.466747	0.880914
K00982	0.000769815	0.000492746	0.000520528	0.00069599	0.000447947	0.000474039	0.000561956	0.000529041	0.000672461	0.000752944	0.000691944	0.000509866	0.000656022	0.000769554	0.000517317	0.0005748	0.000569059	0.000625708	0.000491223	0.000565022	0.000542923	0.000629267	0.000661427	0.00075187	0.000656354	0.000657336	glutamate-ammonia-ligase adenylyltransferase [EC:2.7.7.42]	0.881182	0.109281
K00983	9.78e-05	0.00015697	0.000161718	0.000113497	0.000191956	0.000154736	0.000133647	0.000144845	0.000139683	0.000127269	0.00012996	0.00017574	0.000129071	0.000102979	0.00019923	0.000146254	0.000158994	0.000144198	0.000152078	0.000140278	0.000139019	0.000141258	0.000134315	0.000109734	0.000130278	0.000110651	N-acylneuraminate cytidylyltransferase [EC:2.7.7.43]	0.973923	0.0977632
K00984	4.06e-06	4.25e-06	5.13e-06	2.44e-06	2.26e-06	8.13e-06	5.26e-06	4.94e-06	2.04e-06	2.77e-06	2.49e-06	2.12e-06	2.45e-06	5.41e-06	5.67e-06	6.82e-06	5.92e-06	3.45e-06	4.93e-06	5.32e-06	4.92e-06	3.71e-06	4.18e-06	4.09e-06	3.69e-06	3.95e-06	streptomycin 3""-adenylyltransferase [EC:2.7.7.47]	0.110913	0.00545091
K00986	0.000104412	0.000122609	0.000164309	0.000127627	0.000216489	0.000157565	0.000116144	0.000128784	0.000152635	0.000139089	0.000142037	0.000187713	0.000139838	0.000139627	0.000206234	0.000205731	0.00014803	0.000176881	0.000178284	0.000155246	0.000159198	0.000202754	0.000200023	0.000124869	0.000152314	0.000180158	RNA-directed DNA polymerase [EC:2.7.7.49]	0.224733	0.54177
K00988	1.17e-06	5.36e-07	7.31e-07	4.46e-05	0.00017883	1.67e-05	1.93e-05	6.92e-06	6.94e-05	6.37e-05	0.000101502	0.000142304	4.62e-05	1.74e-06	4.96e-06	3.11e-06	9.77e-06	7.6e-05	5.35e-06	1.11e-05	4.41e-06	4.69e-05	3.39e-05	4.6e-05	8.09e-05	4.56e-05	ATP adenylyltransferase [EC:2.7.7.53]	0.0171139	0.0246679
K00989	0.000195536	0.000133876	0.000145123	0.000209374	0.000189583	0.000152236	0.000178707	0.000148766	0.000193522	0.000211317	0.000213419	0.000185907	0.000198809	0.000205232	0.000151215	0.000159023	0.00016459	0.00021273	0.000163872	0.000168238	0.00016331	0.000193568	0.000196386	0.000223054	0.000223327	0.000211852	ribonuclease PH [EC:2.7.7.56]	0.0606662	0.016814
K00990	0.000783629	0.000513494	0.000557598	0.000853158	0.000453879	0.000531697	0.000657139	0.000582339	0.000689976	0.000752558	0.000731791	0.000543233	0.000824371	0.000797733	0.000516892	0.000578418	0.000582426	0.000631174	0.000600351	0.000600088	0.000612179	0.000635951	0.000675418	0.000761579	0.000665031	0.000729754	[protein-PII] uridylyltransferase [EC:2.7.7.59]	0.854449	0.022428
K00991	0.000152943	0.000119016	0.000123074	0.000224219	0.00029906	0.000151791	0.000173363	0.000139602	0.00020467	0.000211236	0.000256612	0.000272596	0.000226182	0.000159066	0.000158164	0.000126764	0.0001449	0.000219305	0.000141027	0.000148164	0.000137521	0.000182232	0.000175859	0.000202546	0.000233131	0.00020401	2-C-methyl-D-erythritol 4-phosphate cytidylyltransferase [EC:2.7.7.60]	0.0195644	0.023006
K00992	1.42e-06	4.16e-07	1.88e-06	3.14e-06	5.92e-06	9.35e-06	3.31e-06	3.02e-06	2.51e-06	3.06e-06	4.21e-06	4.62e-06	3.62e-06	3.48e-06	9.06e-06	3.56e-06	1.27e-06	2.5e-06	2.95e-06	1.26e-06	1.16e-06	2.16e-06	3.82e-06	2.29e-06	2.59e-06	4.17e-06	[EC:2.7.7.-]	0.0970362	0.816069
K00995	0.000280705	0.000207309	0.000224963	0.000337314	0.000279725	0.000218172	0.000257147	0.000231432	0.000281571	0.000298615	0.000320436	0.00028608	0.000333356	0.000276416	0.000208686	0.000221149	0.000222257	0.000277735	0.000219651	0.000226551	0.000222911	0.000261243	0.000261378	0.000292398	0.000291078	0.000293508	CDP-diacylglycerol--glycerol-3-phosphate 3-phosphatidyltransferase [EC:2.7.8.5]	0.136944	0.0130807
K00996	0.000223999	0.000271051	0.000264648	0.000212125	0.00024284	0.000234402	0.000252658	0.000249763	0.000210051	0.000204738	0.000209712	0.000227553	0.000214972	0.000213132	0.000202881	0.000247312	0.000235941	0.000228034	0.000248899	0.000243021	0.00024468	0.000225581	0.000221606	0.000210859	0.000223452	0.000218486	undecaprenyl-phosphate galactose phosphotransferase [EC:2.7.8.6]	0.0574676	0.439544
K00997	0.000120168	7.93e-05	8.18e-05	0.000126248	7.84e-05	6.94e-05	8.95e-05	8.61e-05	0.000108843	0.000118682	0.000116807	9.03e-05	0.000123852	0.000117619	8.23e-05	8.42e-05	8.76e-05	9.84e-05	7.44e-05	8.62e-05	8.43e-05	9.78e-05	0.000100755	0.000116714	0.000104304	0.000106257	holo-[acyl-carrier protein] synthase [EC:2.7.8.7]	0.715864	0.0624266
K00998	0.000252436	0.000232079	0.000234556	0.00026292	0.000141614	0.000263674	0.000240068	0.000247436	0.000221321	0.000222044	0.000207233	0.000172962	0.000261067	0.000262892	0.000296944	0.00024169	0.00023334	0.000201104	0.000264868	0.000241851	0.000254039	0.000223767	0.000239662	0.000226915	0.000197809	0.000247497	phosphatidylserine synthase [EC:2.7.8.8]	0.185188	0.133549
K01000	0.000490544	0.000498227	0.000497042	0.00057136	0.000629824	0.0005197	0.000505812	0.00051006	0.000570057	0.000550809	0.000585387	0.000620761	0.000577282	0.000477468	0.000509854	0.000471244	0.000474134	0.000549896	0.000518148	0.000487602	0.000501413	0.000535425	0.0005229	0.000512972	0.000544605	0.000547681	phospho-N-acetylmuramoyl-pentapeptide-transferase [EC:2.7.8.13]	0.0192648	0.016814
K01001	7.03e-08	5.15e-08	6.13e-08	2.33e-06	9.28e-06	8.28e-07	1.01e-06	3.86e-07	3.63e-06	3.33e-06	5.29e-06	7.41e-06	2.4e-06	5.07e-08	1.73e-07	1.19e-07	4.44e-07	3.44e-06	2.3e-07	4.98e-07	1.94e-07	2.13e-06	1.53e-06	2.09e-06	3.68e-06	2.06e-06	UDP-N-acetylglucosamine--dolichyl-phosphate N-acetylglucosaminephosphotransferase [EC:2.7.8.15]	0.0171139	0.0184401
K01002	1.56e-06	2.51e-07	3.08e-06	1.51e-06	6.7e-07	1.82e-05	5.41e-06	2.67e-06	8.28e-07	3.46e-06	2.15e-06	1.35e-06	1.77e-06	1.88e-06	5.11e-06	3.6e-06	9.51e-07	7.47e-07	2.43e-06	7.28e-07	4.33e-07	9.36e-07	2.39e-06	5.66e-07	5.9e-07	1.16e-06	phosphoglycerol transferase [EC:2.7.8.20]	0.881182	0.133549
K01003	0.000208499	0.000121709	0.000127326	0.000189075	0.000147108	0.000134159	0.000153118	0.000139071	0.00020241	0.00022138	0.000206168	0.000157897	0.000178732	0.000192888	0.000126037	0.00012519	0.000129173	0.000170755	0.000116282	0.000129264	0.00012565	0.000165824	0.000170138	0.000200345	0.000178901	0.00015935	carboxyvinyl-carboxyphosphonate phosphorylmutase [EC:2.7.8.23]	0.153573	0.0594608
K01004	8.59e-05	0.000106309	0.000101826	5.78e-05	4.74e-05	6.12e-05	8.87e-05	9.04e-05	4.44e-05	4.82e-05	4.37e-05	4.19e-05	5.72e-05	8.78e-05	5.88e-05	0.000106927	0.000106358	6.61e-05	7.84e-05	0.000100087	9.12e-05	6.87e-05	6.72e-05	7.54e-05	7.02e-05	6.85e-05	phosphatidylcholine synthase [EC:2.7.8.24]	0.0180541	0.155269
K01005	8.71e-05	0.000125785	0.000108436	7.1e-05	5.91e-05	9.65e-05	0.000104618	0.000106452	6.12e-05	5.48e-05	5.69e-05	5.92e-05	7.21e-05	8.24e-05	9e-05	0.00010339	9.81e-05	6.72e-05	0.000106074	0.000105165	0.000108093	7.24e-05	7.26e-05	7.11e-05	6.53e-05	8.05e-05	[EC:2.7.8.-]	0.0181199	0.046554
K01006	0.000729777	0.000492017	0.000520532	0.000738517	0.000440117	0.000422461	0.000589811	0.000529169	0.00063513	0.000692899	0.000640814	0.000477168	0.00068494	0.00072431	0.000599721	0.000529442	0.000545537	0.000593218	0.000560202	0.000564867	0.000566279	0.000592638	0.000621381	0.000707568	0.000615645	0.000679943	pyruvate,orthophosphate dikinase [EC:2.7.9.1]	0.957987	0.104397
K01007	7.23e-05	6.6e-05	0.000106522	0.000181047	0.000252886	0.000249974	0.000176053	0.000114797	0.000130222	0.00013707	0.000175411	0.000212509	0.000183625	0.000129506	0.00018181	0.000140522	0.000109071	0.000192564	0.000209746	0.000138324	0.000139552	0.000168018	0.000187276	0.000141648	0.000191713	0.000220449	pyruvate, water dikinase [EC:2.7.9.2]	0.169046	0.142406
K01008	0.00039994	0.000201877	0.000207715	0.000497334	0.00078985	0.000244689	0.000312779	0.000248833	0.000615062	0.000633881	0.000707608	0.000724916	0.000478786	0.000409566	0.000252606	0.000257944	0.000305155	0.000603102	0.000257891	0.000311531	0.000282464	0.000503491	0.000462743	0.000575847	0.000636016	0.00047359	selenide, water dikinase [EC:2.7.9.3]	0.0183363	0.014218
K01011	0.000436586	0.000319687	0.000337111	0.000404172	0.000323162	0.000327013	0.000349518	0.000345727	0.000427917	0.000458423	0.000417474	0.000350368	0.000386368	0.000467353	0.000395851	0.000392744	0.000414486	0.000423504	0.000367764	0.000400839	0.000387586	0.000428757	0.000434352	0.000465244	0.000431768	0.000398941	thiosulfate/3-mercaptopyruvate sulfurtransferase [EC:2.8.1.1 2.8.1.2]	0.396293	0.203255
K01012	0.000212682	0.000309219	0.000311191	0.000291703	0.000416871	0.0003432	0.000293342	0.00030767	0.000286716	0.000250629	0.000301854	0.000388408	0.000309455	0.000232597	0.000340575	0.000307767	0.000301587	0.000306797	0.000337395	0.000304786	0.000316402	0.000298214	0.000282946	0.000244752	0.00029662	0.000308791	biotin synthetase [EC:2.8.1.6]	0.863109	0.329121
K01014	6.53e-07	2.47e-07	9.52e-07	2.34e-06	3.58e-07	5.14e-06	1.61e-06	9.56e-07	4.44e-07	1e-06	1.37e-06	7.28e-07	2.43e-06	8.76e-07	2.01e-06	9.56e-07	2.3e-07	5.03e-07	8.6e-07	3.89e-07	2.09e-07	7.18e-07	1.57e-06	5.86e-07	5.88e-07	1.54e-06	aryl sulfotransferase [EC:2.8.2.1]	0.93033	0.771604
K01023	1.45e-05	1.52e-05	1.82e-05	8.91e-06	9e-06	2.01e-05	1.56e-05	1.73e-05	1.53e-05	1.41e-05	6.96e-06	9.3e-06	1.09e-05	1.93e-05	3.28e-05	2.81e-05	1.85e-05	1.95e-05	2.99e-05	2.46e-05	2.37e-05	2.97e-05	2.9e-05	1.28e-05	1.22e-05	1.41e-05	arylsulfate sulfotransferase [EC:2.8.2.22]	0.139699	0.237277
K01025	0	0	0	0	0	0	0	0	0	2.01e-08	0	0	0	0	6.64e-09	0	0	0	0	3.25e-09	0	0	0	0	0	0	[EC:2.8.2.-]	0.686626	0.155988
K01026	0.000389799	0.000222859	0.000224449	0.000339622	0.000229193	0.000187204	0.0002624	0.000238338	0.000374968	0.000408286	0.000366519	0.000269793	0.000317566	0.000304848	0.000173263	0.000156595	0.000171655	0.000271106	0.000161122	0.000178483	0.000177473	0.00026633	0.000272714	0.000331782	0.000284054	0.000258336	propionate CoA-transferase [EC:2.8.3.1]	0.281265	0.0361475
K01027	3.85e-05	5.17e-05	4.63e-05	2.47e-05	2.17e-05	3.31e-05	4.34e-05	4.35e-05	2.36e-05	2.4e-05	2.07e-05	2.06e-05	2.64e-05	4.92e-05	3.38e-05	5.77e-05	6.29e-05	3.83e-05	4.67e-05	5.84e-05	5.37e-05	4.09e-05	3.83e-05	4.22e-05	3.99e-05	3.43e-05	3-oxoacid CoA-transferase [EC:2.8.3.5]	0.0183363	0.182622
K01028	0.000192004	0.000274708	0.000260052	0.000125473	9.93e-05	0.000248006	0.000218351	0.000247782	0.000140226	0.000125845	0.000100521	0.000113512	0.000136468	0.000197143	0.00024009	0.000259726	0.000254856	0.0001503	0.000243527	0.000244803	0.000248281	0.000181101	0.00018037	0.000148739	0.000136886	0.000144598	3-oxoacid CoA-transferase subunit A [EC:2.8.3.5]	0.0210884	0.0159737
K01029	0.000203714	0.000291082	0.0002788	0.000133304	0.000105365	0.000262072	0.0002304	0.000260579	0.000146748	0.000132683	0.000106047	0.000119168	0.000144792	0.000207476	0.000248696	0.000275669	0.000265225	0.000157458	0.0002538	0.000254597	0.000257947	0.00018897	0.000188478	0.000155505	0.00014297	0.000151695	3-oxoacid CoA-transferase subunit B [EC:2.8.3.5]	0.0183363	0.0159737
K01031	4.58e-05	6.16e-05	4.93e-05	2.8e-05	1.85e-05	5.8e-05	4.87e-05	5.21e-05	2.3e-05	1.97e-05	2.28e-05	2.01e-05	2.63e-05	5.27e-05	4.82e-05	6.4e-05	5.48e-05	3.37e-05	5.37e-05	6.05e-05	5.87e-05	3.87e-05	3.89e-05	4.17e-05	3.62e-05	4.68e-05	3-oxoadipate CoA-transferase, alpha subunit [EC:2.8.3.6]	0.0195644	0.0236379
K01032	4.09e-05	4.77e-05	5.07e-05	2.93e-05	2.25e-05	5.38e-05	4.66e-05	4.53e-05	2.19e-05	2.46e-05	2.36e-05	2.1e-05	2.94e-05	4.83e-05	4.55e-05	6.12e-05	5.3e-05	3.38e-05	4.52e-05	5.01e-05	4.66e-05	3.65e-05	3.88e-05	3.8e-05	3.43e-05	3.84e-05	3-oxoadipate CoA-transferase, beta subunit [EC:2.8.3.6]	0.0324555	0.0102869
K01034	4.04e-05	5.62e-05	4.22e-05	2.78e-05	1.56e-05	4.08e-05	3.94e-05	4.56e-05	2.31e-05	1.83e-05	1.95e-05	1.84e-05	2.73e-05	3.8e-05	3.93e-05	4.55e-05	3.98e-05	2.5e-05	4.01e-05	4.52e-05	4.61e-05	2.98e-05	2.97e-05	3.07e-05	2.55e-05	3.85e-05	acetate CoA-transferase alpha subunit [EC:2.8.3.8]	0.0183775	0.046554
K01035	4.01e-05	6.15e-05	4.3e-05	1.92e-05	1.49e-05	5e-05	4.75e-05	4.8e-05	2.09e-05	1.7e-05	1.74e-05	1.73e-05	2.05e-05	3.68e-05	5.56e-05	4.42e-05	4.12e-05	2.33e-05	4.48e-05	4.79e-05	4.64e-05	2.78e-05	2.68e-05	2.68e-05	2.33e-05	2.76e-05	acetate CoA-transferase beta subunit [EC:2.8.3.8]	0.0381699	0.0184251
K01036	1.22e-08	1.07e-09	1.02e-10	1.81e-08	4.06e-11	4.93e-10	0	3.19e-10	1.23e-10	2.74e-09	8.68e-09	1.28e-10	5.15e-09	3.65e-10	3.55e-07	2.59e-10	7.09e-10	0	6.57e-10	1.04e-09	9.84e-11	1.03e-10	1.04e-09	0	0	0	butyrate-acetoacetate CoA-transferase [EC:2.8.3.9]	0.957987	0.0301087
K01039	8.23e-06	7.96e-06	1.04e-05	8.71e-06	4.97e-06	1.8e-05	1.07e-05	1.07e-05	3.94e-06	5.13e-06	6.45e-06	4.63e-06	8.43e-06	1.07e-05	1.68e-05	1.39e-05	1.05e-05	6.76e-06	1.02e-05	9.9e-06	9.05e-06	7.32e-06	8.96e-06	8.25e-06	7.36e-06	1.26e-05	glutaconate CoA-transferase, subunit A [EC:2.8.3.12]	0.130912	0.0282133
K01040	6.81e-06	6.36e-06	8.77e-06	6.89e-06	4.2e-06	1.67e-05	9.07e-06	9.05e-06	3.26e-06	4.25e-06	5.33e-06	3.82e-06	6.59e-06	8.96e-06	1.45e-05	1.19e-05	8.61e-06	5.49e-06	8.57e-06	8.04e-06	7.34e-06	5.98e-06	7.54e-06	6.73e-06	5.99e-06	9.99e-06	glutaconate CoA-transferase, subunit B [EC:2.8.3.12]	0.0951653	0.0311764
K01041	0.000103707	0.000123005	0.000128379	9.46e-05	5.77e-05	9.74e-05	0.000119048	0.000110387	5.16e-05	5.88e-05	5.77e-05	5.11e-05	8.79e-05	7.23e-05	7.05e-05	8.88e-05	6.97e-05	4.63e-05	7.96e-05	7.26e-05	7.09e-05	4.96e-05	6.15e-05	5.92e-05	5.06e-05	9.05e-05	[EC:2.8.3.-]	0.0181199	0.174326
K01042	2.62e-05	3.59e-05	4.74e-05	2.53e-05	1.61e-05	4.91e-05	3.2e-05	3.77e-05	1.86e-05	2.11e-05	1.53e-05	1.55e-05	2.68e-05	3.32e-05	6.23e-05	5.16e-05	3.75e-05	2.53e-05	3.97e-05	3.39e-05	3.83e-05	2.7e-05	3.49e-05	2.39e-05	1.98e-05	3.28e-05	L-seryl-tRNA(Ser) seleniumtransferase [EC:2.9.1.1]	0.0364627	0.0184251
K01043	0.000152516	0.000211446	0.000238283	0.000130282	0.000105169	0.000171552	0.000153482	0.000189206	0.000134692	0.000118694	9.8e-05	0.000115906	0.000137948	0.000173578	0.000187686	0.000238129	0.00022286	0.000147912	0.000197342	0.000197577	0.000207666	0.000167975	0.000163005	0.000140469	0.000131811	0.000150583	[EC:2.-.-.-]	0.0183775	0.0135912
K01046	3.21e-05	3.15e-05	3.95e-05	6e-05	0.000127406	7.15e-05	5.98e-05	4.39e-05	5.87e-05	6.02e-05	8.35e-05	0.000103241	6.08e-05	4.79e-05	5.5e-05	5.52e-05	5.04e-05	7.53e-05	5.69e-05	5.18e-05	4.84e-05	5.87e-05	5.86e-05	6.12e-05	7.96e-05	6.81e-05	triacylglycerol lipase [EC:3.1.1.3]	0.0252937	0.0319227
K01048	0.000339978	0.000273304	0.000249665	0.000279364	0.000189136	0.000210961	0.000257089	0.000263541	0.000296425	0.000304198	0.000277203	0.000222224	0.0002629	0.000292654	0.000216738	0.000222106	0.000230272	0.000241971	0.000215046	0.000240069	0.000240295	0.000252722	0.000252285	0.000289315	0.000253045	0.000258408	lysophospholipase [EC:3.1.1.5]	0.965572	0.0477279
K01051	2.3e-05	3.56e-05	4.82e-05	2.14e-05	1.43e-05	4.12e-05	2.64e-05	3.32e-05	1.64e-05	1.51e-05	1.3e-05	1.44e-05	2.54e-05	2.41e-05	3.32e-05	4.46e-05	3.1e-05	1.97e-05	3.42e-05	3e-05	3.09e-05	2.08e-05	1.94e-05	1.25e-05	1.48e-05	2.47e-05	pectinesterase [EC:3.1.1.11]	0.0200245	0.014218
K01053	0.000125254	0.000149001	0.000155568	9.14e-05	9.26e-05	0.00016493	0.000149378	0.000150389	9.06e-05	9.04e-05	8.22e-05	8.61e-05	9.82e-05	9.82e-05	0.000121704	0.000133429	0.000109855	8.88e-05	0.000115928	0.000115361	0.000109102	0.000104462	0.000106559	7.99e-05	7.96e-05	9.44e-05	gluconolactonase [EC:3.1.1.17]	0.0623084	0.0119456
K01054	3.01e-06	1.36e-06	2.59e-06	2.38e-06	1.48e-06	6.27e-06	3.27e-06	3.08e-06	1.58e-06	2.1e-06	2.29e-06	1.4e-06	2.36e-06	4.43e-06	6.47e-06	4.28e-06	1.62e-06	1.37e-06	2.91e-06	1.82e-06	2.26e-06	1.8e-06	3.43e-06	1.63e-06	1.2e-06	3.85e-06	acylglycerol lipase [EC:3.1.1.23]	0.482537	0.181607
K01055	0.000321919	0.000247264	0.000237244	0.000267574	0.000182427	0.000223913	0.000251588	0.000245421	0.000280983	0.000298603	0.000273195	0.000211444	0.000251053	0.000306505	0.000209845	0.000243766	0.000247519	0.000252494	0.000221753	0.000250023	0.00024242	0.000259339	0.000261658	0.000302683	0.000265339	0.000254417	3-oxoadipate enol-lactonase [EC:3.1.1.24]	0.949653	0.0932776
K01056	0.000280696	0.000281176	0.000284225	0.000287403	0.000291971	0.000282861	0.000271516	0.000284564	0.000306315	0.000303016	0.000291868	0.000301192	0.000289457	0.000271506	0.000298813	0.000266383	0.000279675	0.000278509	0.000283795	0.000273097	0.000278719	0.000285422	0.000286911	0.000271803	0.00027311	0.00026898	peptidyl-tRNA hydrolase, PTH1 family [EC:3.1.1.29]	0.0293651	0.863172
K01057	0.000170018	0.000140695	0.000151603	0.000195151	0.00029559	0.000145422	0.000162464	0.00014948	0.000214323	0.000220879	0.000246419	0.000264427	0.000192975	0.000181801	0.00014715	0.000176206	0.000177478	0.000238871	0.000150661	0.000173587	0.000162616	0.000212158	0.000203584	0.000220645	0.000244909	0.000206687	6-phosphogluconolactonase [EC:3.1.1.31]	0.0245663	0.0205849
K01058	5.96e-05	8.34e-05	0.000101412	4.81e-05	3.73e-05	0.000118534	7.02e-05	9.11e-05	6.87e-05	6.07e-05	3.73e-05	5.15e-05	5.47e-05	6.41e-05	9.44e-05	9.07e-05	9.27e-05	5.35e-05	9.81e-05	7.99e-05	9.15e-05	7.74e-05	8.41e-05	4.37e-05	4.11e-05	4.57e-05	phospholipase A1 [EC:3.1.1.32]	0.0745232	0.0361475
K01060	2.12e-06	1.76e-06	2.45e-06	4.43e-06	2.13e-06	2.77e-06	1.8e-06	2.56e-06	1.43e-06	4.24e-06	5.35e-06	3.24e-06	4.18e-06	7.8e-07	3.06e-06	1.72e-06	9.53e-07	6.01e-07	1.18e-06	1.15e-06	7.94e-07	9.48e-07	2.13e-06	8.79e-07	8.58e-07	4.68e-06	cephalosporin-C deacetylase [EC:3.1.1.41]	0.351601	0.439544
K01061	5.05e-05	5.56e-05	7.14e-05	9.66e-05	0.000173232	0.00012865	8e-05	7.06e-05	9.25e-05	9.75e-05	0.000125371	0.000148964	0.000102329	6.61e-05	0.000131726	9.13e-05	7.48e-05	0.000126032	8.5e-05	7.51e-05	6.89e-05	0.000110781	0.000114338	9.24e-05	0.000122732	0.000122562	carboxymethylenebutenolidase [EC:3.1.1.45]	0.040597	0.365811
K01062	1.15e-06	1.04e-06	3.01e-06	4.06e-07	7.3e-07	1.31e-05	4.29e-06	3.11e-06	9.7e-07	1.42e-06	1.5e-06	1.15e-06	4.58e-07	1.33e-06	3.42e-06	3.19e-06	1.29e-06	1.08e-06	2.54e-06	1.65e-06	7.98e-07	1.21e-06	2.65e-06	4.1e-07	7.66e-07	6.21e-07	1-alkyl-2-acetylglycerophosphocholine esterase [EC:3.1.1.47]	0.686626	0.0217723
K01066	9.85e-05	0.000120438	0.000135513	9.33e-05	8.02e-05	0.000163559	0.000118882	0.000131538	8.1e-05	8.26e-05	7.8e-05	8.05e-05	9.61e-05	0.000132588	0.000152829	0.000166663	0.000159942	0.000107282	0.000143786	0.000144378	0.000142114	0.000117555	0.000125483	0.000111393	0.000106365	0.000115832	esterase / lipase [EC:3.1.1.-]	0.0231784	0.00545091
K01067	0.00011954	0.000164887	0.000165545	0.000127032	5.87e-05	0.000187361	0.000168007	0.000155827	7.53e-05	6.87e-05	6.92e-05	6.22e-05	0.000124827	0.000157158	0.000161691	0.000195423	0.000160484	0.000106442	0.000217853	0.000179024	0.000190451	0.000120569	0.000133839	0.000117099	9.9e-05	0.000157624	acetyl-CoA hydrolase [EC:3.1.2.1]	0.0252937	0.0371495
K01068	1.77e-07	2.62e-08	3.03e-07	5.26e-08	6.93e-08	1.84e-06	5.36e-07	2.65e-07	8.95e-08	1.38e-07	2.34e-07	1.35e-07	4.85e-08	2.31e-07	4.81e-07	3.28e-07	7.43e-08	3.48e-08	1.94e-07	6.74e-08	6.01e-08	6.49e-08	1.84e-07	7.67e-08	2.99e-08	6.55e-08	palmitoyl-CoA hydrolase [EC:3.1.2.2]	0.795239	0.0932776
K01069	0.000833525	0.000826462	0.000806348	0.000834549	0.000712074	0.000760932	0.000774662	0.000808539	0.000804929	0.000798852	0.000790714	0.000749133	0.000839912	0.000776266	0.000858859	0.000754831	0.000746498	0.000745715	0.000725917	0.000741029	0.000740361	0.00076005	0.000765583	0.000773093	0.000735513	0.000779186	hydroxyacylglutathione hydrolase [EC:3.1.2.6]	0.376025	0.912413
K01070	0.000250365	0.000174749	0.000178873	0.000216577	0.000175477	0.00015869	0.000194818	0.000181603	0.000228256	0.000247378	0.000230775	0.000185953	0.000206022	0.000235417	0.000155425	0.000178018	0.000182359	0.000212635	0.000155774	0.000179899	0.000172477	0.000206179	0.000208438	0.000241528	0.000222171	0.000200174	S-formylglutathione hydrolase [EC:3.1.2.12]	0.433235	0.0504773
K01071	8.75e-07	5.31e-07	1.36e-06	6.08e-06	2.1e-05	6.62e-06	3.85e-06	2.92e-06	8.16e-06	7.98e-06	1.24e-05	1.65e-05	5.97e-06	1.58e-06	5.41e-06	2.39e-06	1.81e-06	8.53e-06	2.19e-06	1.73e-06	1.09e-06	5.5e-06	5.07e-06	5.65e-06	9.17e-06	7.03e-06	oleoyl-[acyl-carrier-protein] hydrolase [EC:3.1.2.14]	0.0189877	0.0851082
K01073	3.03e-06	3.94e-06	3.35e-06	1.71e-06	1.55e-06	9.87e-06	6e-06	4.05e-06	2.31e-06	2.69e-06	1.59e-06	2.01e-06	2.08e-06	4.78e-06	1.96e-05	5.37e-06	4.91e-06	2.79e-06	7.86e-06	5.72e-06	4.47e-06	4.55e-06	6.51e-06	2.12e-06	2.05e-06	2.72e-06	acyl-CoA hydrolase [EC:3.1.2.20]	0.0717763	0.0400482
K01075	1.15e-05	1.43e-05	1.67e-05	7.56e-06	6.89e-06	1.84e-05	1.38e-05	1.42e-05	6.73e-06	7.64e-06	6.6e-06	6.01e-06	8.1e-06	1.84e-05	1.48e-05	2.49e-05	2.11e-05	1.33e-05	1.79e-05	1.9e-05	1.87e-05	1.46e-05	1.53e-05	1.35e-05	1.29e-05	1.16e-05	4-hydroxybenzoyl-CoA thioesterase [EC:3.1.2.23]	0.040597	0.0190735
K01076	0.000254048	0.000300194	0.000286822	0.000195927	0.000138572	0.000266695	0.000231568	0.000279172	0.000230419	0.00020951	0.00017414	0.000173336	0.000198197	0.000227423	0.000234695	0.000254327	0.000245903	0.000186214	0.000259411	0.000243864	0.000263959	0.000224999	0.000223622	0.000193909	0.000171348	0.000194527	[EC:3.1.2.-]	0.0270661	0.0335773
K01077	0.000258434	0.000348231	0.000356331	0.000312376	0.000466058	0.000356658	0.000336805	0.000337875	0.000304803	0.00028126	0.000326256	0.000407214	0.000319799	0.000324731	0.000351938	0.000429771	0.00040298	0.000389405	0.000412435	0.000409513	0.000413341	0.000373223	0.000370435	0.000339365	0.000380321	0.000389604	alkaline phosphatase [EC:3.1.3.1]	0.945063	0.3704
K01078	2.35e-05	3.41e-05	2.33e-05	1.48e-05	1.5e-05	4.81e-05	2.92e-05	3.1e-05	1.48e-05	1.08e-05	1.61e-05	1.56e-05	1.47e-05	1.76e-05	3.11e-05	2.01e-05	1.06e-05	1.12e-05	2.28e-05	1.83e-05	1.94e-05	1.3e-05	1.66e-05	1.35e-05	1.16e-05	2.23e-05	acid phosphatase [EC:3.1.3.2]	0.137732	0.29107
K01079	0.000307246	0.000258953	0.000275432	0.000288222	0.000184167	0.000251173	0.000253742	0.000283973	0.000286648	0.000296511	0.000261767	0.000227965	0.000287232	0.000311042	0.000232457	0.000274312	0.000300665	0.000250557	0.000268514	0.000279511	0.000288746	0.00027864	0.000284491	0.000280539	0.000256304	0.000251422	phosphoserine phosphatase [EC:3.1.3.3]	0.889107	0.805609
K01081	0.000394931	0.000533801	0.000541725	0.000331946	0.000277245	0.000455447	0.000462666	0.000496865	0.000298253	0.000294641	0.000272817	0.000295464	0.000366217	0.000431152	0.000455691	0.000546923	0.000569097	0.000362978	0.000477718	0.000516423	0.000502044	0.000394642	0.000386347	0.000362207	0.000355701	0.00033116	5'-nucleotidase [EC:3.1.3.5]	0.0180133	0.0130807
K01082	0.000284464	0.000276105	0.00025083	0.000362754	0.000483715	0.000262507	0.000301838	0.000279505	0.000352063	0.00034252	0.000407884	0.000441822	0.000363355	0.000269036	0.000290233	0.000241907	0.000260147	0.000361263	0.000255908	0.000274762	0.000264254	0.000313135	0.000296042	0.000337587	0.000374627	0.000345212	3'(2'), 5'-bisphosphate nucleotidase [EC:3.1.3.7]	0.02204	0.022428
K01083	0.000100669	0.000150417	0.000115543	5.3e-05	6.09e-05	0.000128499	0.000111927	0.000128306	7.1e-05	5.19e-05	5.48e-05	6.25e-05	5.57e-05	6.94e-05	9.16e-05	9.77e-05	7.78e-05	6e-05	0.000101346	9.93e-05	0.00010774	7.31e-05	7e-05	5.67e-05	5.38e-05	6.98e-05	3-phytase [EC:3.1.3.8]	0.0836785	0.0737966
K01085	5.91e-07	3.61e-07	8.66e-07	6.87e-07	2.58e-07	3.61e-06	1.34e-06	1.14e-06	2.76e-07	1.95e-06	7.9e-07	5.2e-07	1.06e-06	8.81e-07	3.55e-06	1.31e-06	7.6e-07	3.39e-07	1.32e-06	6.7e-07	8.5e-07	3.91e-07	1.23e-06	5.26e-07	3.99e-07	1.01e-06	glucose-1-phosphatase [EC:3.1.3.10]	0.863109	0.107025
K01087	5.58e-05	7.18e-05	8.18e-05	5.23e-05	3.3e-05	9.15e-05	6.75e-05	7.06e-05	3.94e-05	4.62e-05	4.23e-05	3.66e-05	5.43e-05	7.54e-05	9.06e-05	0.000102486	9.1e-05	6e-05	8.49e-05	8.53e-05	8.52e-05	6.77e-05	7.66e-05	6.18e-05	5.48e-05	6.87e-05	trehalose 6-phosphate phosphatase [EC:3.1.3.12]	0.0277243	0.00775544
K01089	0.00026947	0.000299932	0.000298954	0.000237299	0.000163707	0.000314537	0.00024999	0.000294989	0.000284856	0.000261464	0.000213942	0.000212827	0.000242658	0.000245965	0.000318305	0.000262139	0.000265336	0.00021597	0.000298742	0.000260523	0.000288699	0.000260991	0.000264981	0.000214828	0.000190016	0.000218467	imidazoleglycerol-phosphate dehydratase / histidinol-phosphatase [EC:4.2.1.19 3.1.3.15]	0.0836785	0.0655658
K01090	8.06e-05	8.71e-05	0.000117019	0.000258516	0.000204416	0.000186796	0.000187206	0.000127641	0.000113245	0.000126385	0.000185821	0.000197685	0.000268935	9.97e-05	0.000138094	9.47e-05	9.83e-05	0.00013798	0.000192093	0.000118095	0.000137998	0.000112519	0.000137617	0.000115826	0.000147216	0.000216677	protein phosphatase [EC:3.1.3.16]	0.391068	0.403246
K01091	0.000503781	0.000510412	0.000525967	0.000530272	0.000495591	0.000480449	0.000560193	0.000506747	0.000411486	0.000442627	0.00047195	0.000455318	0.000527248	0.000537543	0.000421761	0.00054936	0.000546076	0.000497757	0.000505576	0.000539021	0.000516824	0.000471525	0.00048686	0.000522979	0.000523794	0.000529275	phosphoglycolate phosphatase [EC:3.1.3.18]	0.0932273	0.324624
K01092	0.000714969	0.00064388	0.000630197	0.000793532	0.000925139	0.000549318	0.000720844	0.00063771	0.000723047	0.000746022	0.000833219	0.000842417	0.00077143	0.000720515	0.000546189	0.00065607	0.000675325	0.000796615	0.000627904	0.000695102	0.000660931	0.00071503	0.000693021	0.000798856	0.000842294	0.000794819	myo-inositol-1(or 4)-monophosphatase [EC:3.1.3.25]	0.0517478	0.0243242
K01093	1.56e-06	4.33e-07	2.27e-06	5.59e-07	5.81e-07	1.34e-05	3.91e-06	2.06e-06	7.66e-07	2.15e-06	2.13e-06	1.08e-06	4.81e-07	1.72e-06	4.24e-06	2.5e-06	5.69e-07	9.22e-07	2e-06	7.21e-07	2.84e-07	1.3e-06	3.14e-06	7.38e-07	8.65e-07	8.13e-07	4-phytase / acid phosphatase [EC:3.1.3.26 3.1.3.2]	0.889107	0.550923
K01095	0.000123396	8.68e-05	8.86e-05	0.000113082	7.56e-05	8.11e-05	0.000105509	9.22e-05	0.000108505	0.00011898	0.000106558	8.09e-05	0.000107521	0.000128437	8.67e-05	9.5e-05	0.000101663	0.000103578	9.82e-05	0.000102526	0.000101083	0.000103384	0.000107879	0.000122572	0.000107846	0.000100655	phosphatidylglycerophosphatase A [EC:3.1.3.27]	0.984194	0.111642
K01096	7.86e-06	6.78e-06	9.67e-06	1.24e-05	8.68e-06	1.22e-05	7.63e-06	7.93e-06	4.73e-06	6.68e-06	7.81e-06	7.37e-06	1.13e-05	1.03e-05	1.5e-05	1.3e-05	8.59e-06	8.13e-06	8.05e-06	8.39e-06	7.41e-06	8.03e-06	1.03e-05	9.13e-06	8.93e-06	1.69e-05	phosphatidylglycerophosphatase B [EC:3.1.3.27]	0.765322	0.661706
K01101	2.03e-06	1.38e-06	1.91e-06	2.94e-06	1.25e-06	1.43e-06	1.69e-06	2.07e-06	9.92e-07	2.42e-06	2.88e-06	1.73e-06	2.79e-06	1.27e-06	2.47e-06	1.2e-06	9.69e-07	5.2e-07	5.05e-07	7.21e-07	9.1e-07	8.09e-07	1.21e-06	5.96e-07	6.58e-07	3.01e-06	4-nitrophenyl phosphatase [EC:3.1.3.41]	0.871863	0.352413
K01103	4.32e-10	0	0	2.86e-08	0	1.58e-08	1.36e-08	4.32e-08	0	0	2.19e-08	8.27e-09	2.21e-08	7e-10	2.65e-07	0	0	2.48e-08	4.52e-09	1.44e-08	2.2e-08	5.85e-08	2.52e-08	3.95e-08	8.72e-08	1.93e-07	6-phosphofructo-2-kinase / fructose-2,6-bisphosphatase [EC:2.7.1.105 3.1.3.46]	0.889483	0.192242
K01104	0.000139611	0.00020231	0.000222574	0.000193739	0.00021828	0.000231008	0.000207548	0.000200271	0.00016641	0.000152369	0.000167811	0.000205258	0.000202236	0.000172698	0.000222986	0.000231626	0.000212172	0.000195793	0.000266573	0.000217364	0.00023386	0.000196836	0.000198622	0.000161883	0.00017958	0.00021086	protein-tyrosine phosphatase [EC:3.1.3.48]	0.553134	0.0812138
K01112	2.47e-05	3.06e-05	3.83e-05	3.39e-05	3.5e-05	3.8e-05	2.85e-05	3.25e-05	2.68e-05	2.88e-05	3.05e-05	3.32e-05	3.39e-05	3e-05	4.3e-05	4.41e-05	3.9e-05	3.74e-05	3.7e-05	3.55e-05	3.7e-05	3.74e-05	4.01e-05	3.36e-05	3.55e-05	4.36e-05	[EC:3.1.3.-]	0.854449	0.557606
K01113	0.000204087	0.000289644	0.000273823	0.00021823	0.000199792	0.000334794	0.000291794	0.000269717	0.000185663	0.000157104	0.000169482	0.000195012	0.000222966	0.000199634	0.000347105	0.000265501	0.000215546	0.000199347	0.000329919	0.000260189	0.000279155	0.000221645	0.000234647	0.000168894	0.000173456	0.000248673	alkaline phosphatase D [EC:3.1.3.1]	0.0364627	0.0851082
K01114	5.84e-05	2.69e-05	5.57e-05	6.25e-05	3.71e-05	0.00015952	6.29e-05	5.02e-05	5.61e-05	7.04e-05	7.18e-05	4.77e-05	6.01e-05	7.45e-05	0.000111883	7.3e-05	3.46e-05	4.5e-05	6.44e-05	3.36e-05	4.02e-05	5.09e-05	8.21e-05	5.53e-05	4.16e-05	6.17e-05	phospholipase C [EC:3.1.4.3]	0.704952	0.78849
K01115	6.27e-05	7.71e-05	7.18e-05	3.93e-05	3.49e-05	4.95e-05	6.87e-05	6.72e-05	3.43e-05	3.77e-05	3.3e-05	3.12e-05	4.15e-05	8.17e-05	4.88e-05	9.51e-05	9.98e-05	6.16e-05	7.34e-05	9.42e-05	8.65e-05	6.38e-05	6.26e-05	6.87e-05	6.44e-05	5.26e-05	phospholipase D [EC:3.1.4.4]	0.0183363	0.159885
K01117	3.11e-09	8.91e-09	2.67e-09	5.07e-09	1.47e-08	2.13e-09	9.13e-10	1.2e-08	8.52e-09	1.48e-08	1.09e-08	7.11e-09	1.89e-09	2.17e-08	1.9e-07	1.58e-09	6.24e-08	1.26e-08	8.14e-09	2.3e-08	8.23e-09	1.55e-08	4.2e-08	8.83e-09	1.2e-08	2.56e-08	sphingomyelin phosphodiesterase [EC:3.1.4.12]	0.252004	0.728173
K01118	6.65e-05	8.19e-05	8.35e-05	4.89e-05	4.48e-05	8.94e-05	7.96e-05	7.95e-05	3.84e-05	4.59e-05	3.94e-05	3.72e-05	5.09e-05	8.76e-05	8.15e-05	0.000106232	0.000101525	6.39e-05	8.34e-05	9.42e-05	8.87e-05	6.68e-05	7.38e-05	7.04e-05	6.61e-05	6.11e-05	FMN-dependent NADH-azoreductase [EC:1.7.-.-]	0.0312238	0.0135912
K01119	0.00024917	0.000320167	0.000301937	0.000150307	0.000160585	0.000208973	0.000281749	0.000277839	0.000148301	0.000157164	0.000138703	0.000142731	0.000160561	0.000288879	0.000204717	0.000346737	0.000365325	0.000234409	0.000271418	0.000339286	0.000311327	0.000238689	0.00022498	0.00024947	0.000243018	0.000186501	2',3'-cyclic-nucleotide 2'-phosphodiesterase [EC:3.1.4.16]	0.0309399	0.127375
K01120	8.66e-06	9.85e-06	9.78e-06	8.61e-06	4.81e-06	1.13e-05	1.05e-05	1e-05	4.64e-06	6.2e-06	5.45e-06	4.64e-06	9.36e-06	1.38e-05	1.55e-05	1.53e-05	1.67e-05	9.86e-06	1.37e-05	1.56e-05	1.54e-05	1.04e-05	1.24e-05	1.15e-05	1.03e-05	1.28e-05	3',5'-cyclic-nucleotide phosphodiesterase [EC:3.1.4.17]	0.0898093	0.0134186
K01126	0.000516614	0.000594155	0.000614647	0.000398938	0.000351125	0.000551165	0.000519233	0.000580188	0.000450194	0.00044236	0.000373736	0.000381983	0.000410041	0.000467732	0.000513496	0.000548704	0.000551268	0.000414649	0.000512485	0.000511755	0.000530657	0.000458881	0.000470754	0.000409408	0.000389239	0.000394942	glycerophosphoryl diester phosphodiesterase [EC:3.1.4.46]	0.020561	0.016814
K01127	1.3e-05	1.51e-05	1.36e-05	3.18e-05	7e-05	1.42e-05	2.01e-05	1.55e-05	3.12e-05	3.21e-05	4.24e-05	5.61e-05	2.93e-05	1.43e-05	1.19e-05	1.42e-05	1.86e-05	4.65e-05	1.28e-05	1.9e-05	1.46e-05	3.26e-05	2.68e-05	3.28e-05	4.93e-05	3.08e-05	glycosylphosphatidylinositol phospholipase D [EC:3.1.4.50]	0.0324555	0.0150581
K01128	0.000112424	0.000145942	0.000131654	5.89e-05	6.31e-05	8.02e-05	0.000124449	0.000122097	6.21e-05	6.55e-05	5.49e-05	5.55e-05	6.31e-05	0.000132675	7.15e-05	0.000156291	0.000170238	0.000103421	0.000122202	0.000159421	0.000145813	0.000106336	9.83e-05	0.000113506	0.000108182	7.49e-05	[EC:3.1.4.-]	0.0332946	0.181607
K01129	0.000557023	0.000555151	0.000560314	0.000493157	0.000321231	0.000503178	0.000498915	0.000546469	0.000500858	0.000492913	0.00042344	0.000377932	0.000485645	0.000563658	0.000498441	0.000560883	0.000553716	0.000460503	0.000573036	0.000550181	0.000579078	0.000516067	0.000521274	0.000497004	0.000442867	0.000482438	dGTPase [EC:3.1.5.1]	0.0195644	0.124128
K01130	0.000820378	0.00107483	0.00114098	0.0010923	0.000490996	0.00121775	0.00143307	0.00110259	0.000622792	0.000563814	0.000516715	0.00050514	0.00104361	0.000765118	0.000822488	0.000900539	0.000761824	0.000605918	0.00163084	0.00105652	0.00124809	0.000693767	0.000818717	0.00059385	0.000516203	0.00103852	arylsulfatase [EC:3.1.6.1]	0.0270661	0.233873
K01133	0.000413493	0.000291168	0.000295256	0.000366239	0.000244542	0.000256346	0.000345866	0.000302844	0.000372052	0.000401356	0.000360718	0.000275117	0.000345057	0.000404547	0.000250333	0.000300162	0.000319763	0.000342353	0.000312508	0.000327463	0.000321908	0.000341809	0.000346737	0.000404021	0.000354325	0.000325247	choline-sulfatase [EC:3.1.6.6]	0.963021	0.0565886
K01134	2.73e-05	3.56e-05	6.72e-05	0.000100904	2.47e-05	9.66e-05	0.000112314	5.97e-05	3.12e-05	2.85e-05	2.41e-05	2.47e-05	9.27e-05	5.19e-05	6.17e-05	6.28e-05	4.55e-05	4.07e-05	0.000168352	8.1e-05	0.000103908	5.02e-05	6.92e-05	3.22e-05	2.72e-05	9.54e-05	arylsulfatase A [EC:3.1.6.8]	0.0799111	0.502312
K01135	1.88e-07	2.54e-07	2.63e-07	6.02e-07	1.11e-07	8.78e-07	5.02e-07	5.43e-07	4.52e-07	2.26e-07	2.78e-07	2.85e-07	6.23e-07	3.56e-07	2.36e-06	4.21e-07	9.44e-07	4.1e-07	1.24e-06	9.26e-07	1.23e-06	8.53e-07	7.42e-07	5.68e-07	4.83e-07	2.57e-06	arylsulfatase B [EC:3.1.6.12]	0.90205	0.716646
K01136	4.04e-05	5.11e-05	7.41e-05	5.67e-05	3.02e-05	7.85e-05	7.02e-05	6.13e-05	4.71e-05	4.07e-05	2.55e-05	3.19e-05	5.81e-05	6.06e-05	8.74e-05	9.52e-05	7e-05	5.97e-05	0.000122637	8.41e-05	9.3e-05	8.19e-05	8.89e-05	4.19e-05	3.87e-05	6.64e-05	iduronate 2-sulfatase [EC:3.1.6.13]	0.0717763	0.135047
K01137	9.22e-06	1.26e-05	2e-05	1.74e-05	6.05e-06	1.97e-05	1.97e-05	1.48e-05	1.03e-05	8.98e-06	5.64e-06	6.72e-06	1.69e-05	1.45e-05	1.8e-05	2.18e-05	1.66e-05	1.25e-05	3.23e-05	1.94e-05	2.37e-05	1.65e-05	1.95e-05	9.29e-06	8.17e-06	1.81e-05	N-acetylglucosamine-6-sulfatase [EC:3.1.6.14]	0.0301345	0.25157
K01138	0.000103046	0.000147763	0.000212526	0.000177246	8.77e-05	0.000211931	0.00020537	0.000168552	0.000120678	0.000106438	7.81e-05	9.24e-05	0.000176749	0.000149442	0.000208689	0.00022688	0.000183983	0.00014889	0.000319044	0.000207538	0.000241266	0.000182021	0.000202997	0.000116531	0.000106811	0.000190994	uncharacterized sulfatase [EC:3.1.6.-]	0.0381699	0.116339
K01139	0.000251493	0.000218228	0.000235813	0.000388039	0.000770704	0.000284324	0.00029084	0.000247665	0.000410557	0.000413761	0.000540649	0.000644624	0.000386431	0.000264745	0.000247632	0.000265624	0.000270002	0.000487834	0.000215534	0.000266031	0.000224256	0.000380927	0.00034714	0.00040603	0.000519057	0.000424645	guanosine-3',5'-bis(diphosphate) 3'-pyrophosphohydrolase [EC:3.1.7.2]	0.0183363	0.0422235
K01141	1.81e-05	1.34e-05	2.53e-05	7.44e-05	1.54e-05	7.1e-05	3.46e-05	4.15e-05	1.27e-05	1.06e-05	3.56e-05	2.73e-05	8.6e-05	2.04e-05	3.99e-05	1.87e-05	1.15e-05	4.31e-06	1.82e-05	8.61e-06	1.43e-05	6.86e-06	1.09e-05	7.86e-06	7.46e-06	3.42e-05	exodeoxyribonuclease I [EC:3.1.11.1]	0.987843	0.109281
K01142	0.00063444	0.000595939	0.00058014	0.000635609	0.000599385	0.000594186	0.000592531	0.000604832	0.000637528	0.00063406	0.000637985	0.000618545	0.000633089	0.000609271	0.000600336	0.000567031	0.000572472	0.000596948	0.000575863	0.000583448	0.000588804	0.000603397	0.000601797	0.000611554	0.000600595	0.000605741	exodeoxyribonuclease III [EC:3.1.11.2]	0.131416	0.0515087
K01143	1.12e-05	8.51e-06	1.37e-05	1.63e-05	3.96e-06	3.98e-06	4.19e-06	7.15e-06	2.47e-06	3.63e-06	5.62e-06	3.97e-06	1.34e-05	9.68e-06	1.17e-05	1.4e-05	7.41e-06	5.54e-06	6.18e-06	7.3e-06	6.45e-06	6.18e-06	7.64e-06	7.31e-06	6.19e-06	1.85e-05	exodeoxyribonuclease (lambda-induced) [EC:3.1.11.3]	0.110913	0.300617
K01144	0.000539121	0.000688839	0.000656254	0.000425776	0.000448149	0.000532819	0.000557322	0.000608452	0.000468988	0.000437755	0.000404549	0.000449918	0.000444979	0.000528906	0.000595249	0.000646053	0.000640396	0.0005055	0.0005847	0.000623063	0.000616132	0.000534513	0.000511061	0.000484662	0.000483286	0.00046687	exodeoxyribonuclease V [EC:3.1.11.5]	0.0334316	0.0119456
K01145	0	0	0	2.7e-10	5.68e-10	3.05e-10	0	4.07e-10	0	6.11e-10	0	0	0	0	9.47e-10	0	0	0	5.21e-09	1.31e-09	0	0	0	3.43e-10	0	2.92e-09	exodeoxyribonuclease VII [EC:3.1.11.6]	0.626597	0.984449
K01146	8.49e-07	2.04e-07	7.99e-07	1.66e-07	4.7e-07	3.4e-06	1.13e-06	1.08e-06	3.07e-07	2.23e-06	6.84e-07	6.21e-07	9.83e-08	1.09e-06	4.16e-06	6.34e-07	2.73e-07	2.89e-07	8.08e-07	2.07e-07	2.14e-07	4.66e-07	1.96e-06	2.76e-07	4.82e-07	3.09e-07	protein Xni	0.889107	0.577511
K01147	2.42e-05	1.72e-05	3.04e-05	0.000218915	0.000499592	0.000111242	9.57e-05	6.15e-05	0.000203844	0.000190496	0.000318047	0.000419133	0.000240663	3.64e-05	4.93e-05	2.88e-05	4.38e-05	0.000248718	5.11e-05	5.07e-05	3.91e-05	0.000160762	0.000133701	0.000159629	0.00026806	0.00019841	exoribonuclease II [EC:3.1.13.1]	0.0189877	0.0184401
K01150	1.48e-05	2.13e-05	2.83e-05	1.59e-05	1.04e-05	2.86e-05	1.69e-05	2.34e-05	1.61e-05	1.51e-05	9.78e-06	1.11e-05	1.82e-05	2.05e-05	3.51e-05	3.28e-05	2.48e-05	1.77e-05	2.78e-05	2.07e-05	2.53e-05	2.25e-05	2.59e-05	1.37e-05	1.2e-05	1.8e-05	deoxyribonuclease I [EC:3.1.21.1]	0.0819158	0.0389905
K01151	2.54e-06	2.2e-06	2.24e-06	2.95e-06	9.21e-07	2.41e-06	2.57e-06	3.41e-06	1.01e-06	5.61e-06	2.78e-06	2.01e-06	2.79e-06	1.52e-06	1.01e-05	1.36e-06	1.6e-06	7.82e-07	1.85e-06	1.34e-06	1.07e-06	1e-06	3.8e-06	1.15e-06	1.44e-06	4.41e-06	deoxyribonuclease IV [EC:3.1.21.2]	0.987843	0.320435
K01153	0.00120608	0.00176589	0.00169148	0.000963606	0.000747582	0.00170504	0.00148994	0.00159393	0.000976546	0.000866621	0.000687779	0.000829987	0.00105877	0.00130885	0.00203484	0.00172858	0.00167489	0.00106931	0.00181133	0.00168657	0.00172624	0.00128641	0.001346	0.000986396	0.000941086	0.0011575	type I restriction enzyme, R subunit [EC:3.1.21.3]	0.0202643	0.016814
K01154	0.000507013	0.000740299	0.000702806	0.000399935	0.000323079	0.000715465	0.000620295	0.000664318	0.000413546	0.000373031	0.000291616	0.000358212	0.000439425	0.000534692	0.000871624	0.000708224	0.000675119	0.000438194	0.000749363	0.000689064	0.000706935	0.000530821	0.000565267	0.000396553	0.000382308	0.000476419	type I restriction enzyme, S subunit [EC:3.1.21.3]	0.0202643	0.016814
K01155	1.78e-05	3.41e-05	3.53e-05	2.43e-05	3.55e-05	3.31e-05	2.6e-05	2.64e-05	2.21e-05	2.2e-05	2.4e-05	3.19e-05	2.81e-05	2.98e-05	5.57e-05	4.23e-05	3.36e-05	2.99e-05	3.78e-05	3.34e-05	3.02e-05	3.07e-05	3.12e-05	1.99e-05	2.57e-05	2.9e-05	type II restriction enzyme [EC:3.1.21.4]	0.698789	0.016814
K01156	0.000415499	7.75e-05	0.000118717	0.000464536	0.000284005	0.000162009	0.00018542	0.000157295	0.00050421	0.000551004	0.000510984	0.000357839	0.000421421	0.000370007	0.00023649	9.94e-05	0.000107	0.000353241	0.000143459	0.000125633	0.000140411	0.000340551	0.000367503	0.000433559	0.000365739	0.000372338	type III restriction enzyme [EC:3.1.21.5]	0.0543821	0.0205849
K01157	6.26e-05	4.66e-05	4.82e-05	5.64e-05	3.93e-05	3.29e-05	4.56e-05	4.41e-05	5.54e-05	5.95e-05	5.51e-05	4.31e-05	5.3e-05	5.94e-05	3.64e-05	4.86e-05	4.76e-05	5.17e-05	3.99e-05	4.69e-05	4.43e-05	5.13e-05	5.06e-05	6e-05	5.36e-05	5.19e-05	[EC:3.1.21.-]	0.981707	0.0554371
K01158	1.38e-06	1.41e-08	6.31e-08	2.17e-06	2.36e-06	7.38e-07	1e-07	1.13e-07	1.1e-06	4.42e-06	5.37e-06	3.2e-06	1.86e-06	1.33e-07	2.91e-07	1.45e-07	2.38e-08	8.4e-08	1.94e-07	4.2e-08	4.9e-08	5.3e-08	1.65e-06	2.95e-07	2.94e-07	7.78e-08	deoxyribonuclease II [EC:3.1.22.1]	0.0200245	0.536312
K01159	0.000202204	0.000213652	0.000214345	0.000222741	0.00026247	0.000231845	0.000215901	0.00021705	0.000241187	0.0002331	0.000235452	0.00025711	0.000224323	0.000199614	0.000243126	0.00020236	0.000211436	0.000227659	0.000230249	0.000212206	0.00021613	0.000226321	0.000223167	0.000209646	0.00022215	0.000217878	crossover junction endodeoxyribonuclease RuvC [EC:3.1.22.4]	0.0183363	0.692749
K01160	3.77e-09	6.06e-09	4.76e-09	4.34e-08	6.05e-09	6.94e-09	5.94e-09	1.6e-08	5.18e-09	5.97e-07	2.08e-08	8.31e-09	3.44e-08	2.61e-08	1.75e-07	7.3e-09	2.62e-09	2.04e-08	2.23e-08	1.08e-08	7.7e-09	1.31e-08	3.96e-08	4.23e-08	1.45e-08	9.07e-08	crossover junction endodeoxyribonuclease RusA [EC:3.1.22.4]	0.36022	0.294885
K01161	1.11e-06	6.93e-07	1.27e-06	8.63e-06	2.81e-05	3.14e-06	3.31e-06	1.67e-06	1.09e-05	1.02e-05	1.63e-05	2.24e-05	8.45e-06	1.12e-06	2.24e-06	1.89e-06	2.04e-06	1.34e-05	1.31e-06	2.3e-06	1.11e-06	8.53e-06	6.61e-06	8.59e-06	1.44e-05	1.03e-05	deoxyribonuclease (pyrimidine dimer) [EC:3.1.25.1]	0.0189877	0.0515087
K01163	4.08e-08	1.04e-08	7.14e-08	3.56e-09	4.7e-08	5.27e-07	2.81e-07	2.59e-07	1.91e-08	3.91e-08	7.47e-08	2.97e-08	4.18e-09	4.19e-08	1.82e-06	1.27e-07	2.9e-08	7.79e-08	3.52e-07	2.16e-07	1.41e-07	4.75e-08	3.07e-08	1.65e-08	2.68e-08	7.15e-08	hypothetical protein	0.968891	0.170129
K01166	4.34e-05	5.51e-05	5.1e-05	2.65e-05	2.42e-05	3.05e-05	4.63e-05	4.63e-05	2.32e-05	2.49e-05	2.17e-05	2.13e-05	2.73e-05	5.6e-05	3.35e-05	6.66e-05	6.98e-05	4.29e-05	5.07e-05	6.56e-05	5.99e-05	4.44e-05	4.22e-05	4.79e-05	4.52e-05	3.73e-05	ribonuclease T2 [EC:3.1.27.1]	0.0186499	0.17125
K01167	9.6e-07	3e-07	1.55e-06	2.76e-07	3.53e-07	8.56e-06	2.51e-06	1.4e-06	4.91e-07	1.01e-06	1.19e-06	6.91e-07	4.52e-07	1.85e-06	3.97e-06	2.49e-06	4.9e-07	3.98e-07	2.02e-06	5.82e-07	5.54e-07	6.77e-07	2.02e-06	6.09e-07	3.34e-07	7.41e-07	ribonuclease T1 [EC:3.1.27.3]	0.892746	0.276115
K01169	1.29e-06	8.04e-07	1.47e-06	2.65e-06	4.23e-07	1.24e-06	5.77e-07	8.41e-07	3.21e-07	1.11e-06	1.18e-06	5.85e-07	2.24e-06	1.76e-06	3.44e-06	1.98e-06	5.09e-07	6.9e-07	1.1e-06	7.27e-07	6.36e-07	9.28e-07	1.72e-06	1.5e-06	8.85e-07	3.8e-06	ribonuclease I (enterobacter ribonuclease) [EC:3.1.27.6]	0.53601	0.875711
K01172	5.38e-06	6.66e-06	6.22e-06	3.17e-06	3.08e-06	3.85e-06	5.86e-06	5.8e-06	2.93e-06	3.1e-06	2.67e-06	2.66e-06	3.28e-06	8.35e-06	5.02e-06	9.94e-06	1.06e-05	6.37e-06	7.55e-06	9.79e-06	8.98e-06	6.65e-06	6.19e-06	7.02e-06	6.72e-06	5.2e-06	[EC:3.1.27.-]	0.0183363	0.17125
K01173	0.000124626	0.000199135	0.000196165	9.73e-05	8.93e-05	0.00019818	0.000152839	0.000183956	0.00011991	0.000106775	8.2e-05	0.000104388	0.000110325	0.000115197	0.000186314	0.000170706	0.000173255	0.000106098	0.000181103	0.00016085	0.000165452	0.000134297	0.000133736	9.1e-05	8.76e-05	9.63e-05	endonuclease G, mitochondrial	0.0312238	0.0184401
K01174	1.63e-05	1.98e-05	1.83e-05	1.09e-05	1.65e-05	1.45e-05	1.83e-05	1.84e-05	1.17e-05	1.43e-05	1.26e-05	1.44e-05	1.22e-05	1.69e-05	1.32e-05	1.93e-05	2.11e-05	1.8e-05	1.6e-05	2.02e-05	1.81e-05	1.62e-05	1.73e-05	1.72e-05	1.94e-05	1.38e-05	micrococcal nuclease [EC:3.1.31.1]	0.196521	0.583499
K01175	0.000449733	0.000444189	0.000454527	0.000407967	0.000266023	0.000462495	0.000427837	0.000452852	0.000427416	0.000420353	0.000356661	0.00032409	0.000407168	0.000443513	0.000452373	0.000431622	0.000430852	0.000367923	0.000480138	0.000432485	0.000459784	0.000417787	0.000435764	0.000387776	0.000346422	0.000387166	[EC:3.1.-.-]	0.040597	0.120075
K01176	0.000146435	0.000226258	0.000263215	0.000126989	0.000103019	0.000266668	0.000169851	0.000253674	0.000175681	0.000149886	9.43e-05	0.000141432	0.000144078	0.000146543	0.000236931	0.000218091	0.000242728	0.000134133	0.000256191	0.00021389	0.000240321	0.000188329	0.000191998	0.000102965	0.000105679	0.000133021	alpha-amylase [EC:3.2.1.1]	0.0932273	0.0309004
K01178	3.68e-05	3.76e-05	5.41e-05	3.42e-05	2.17e-05	7.45e-05	4.17e-05	4.7e-05	3.27e-05	3.31e-05	2.43e-05	2.44e-05	3.82e-05	4.86e-05	7.5e-05	7.06e-05	4.38e-05	3.97e-05	6.46e-05	5.13e-05	5.22e-05	5.96e-05	6.77e-05	2.88e-05	2.84e-05	4.99e-05	glucoamylase [EC:3.2.1.3]	0.0574676	0.142406
K01179	0.00023333	0.000315411	0.000384401	0.00024998	0.000172833	0.000442465	0.000309743	0.000349699	0.000233335	0.000227179	0.000174205	0.000201302	0.000267741	0.000290552	0.000455889	0.000416435	0.000381565	0.000258294	0.000447023	0.000367039	0.000390366	0.000325924	0.000359868	0.000216135	0.000213052	0.000299345	endoglucanase [EC:3.2.1.4]	0.0356609	0.0246679
K01180	4.8e-10	8.27e-10	0	0	2.39e-09	0	0	4.12e-10	4.28e-09	2.08e-09	2.29e-09	1.45e-09	0	1.28e-09	4.27e-08	0	2.25e-08	0	3.53e-10	5.19e-09	0	3.27e-09	2.51e-09	0	1.45e-09	0	endo-1,3(4)-beta-glucanase [EC:3.2.1.6]	0.0684764	0.150075
K01181	8.75e-05	9.12e-05	0.00012145	7.91e-05	8.58e-05	0.000124663	9.4e-05	0.000109415	8.83e-05	9.23e-05	7.48e-05	8.4e-05	8.5e-05	0.000106478	0.00014094	0.000152007	0.000110514	0.000111759	0.000142925	0.000124515	0.000130582	0.000148006	0.000156466	7.64e-05	8.98e-05	0.000113563	endo-1,4-beta-xylanase [EC:3.2.1.8]	0.198865	0.448246
K01182	7.99e-05	0.000113685	0.000138036	7.93e-05	5.28e-05	9.55e-05	8.63e-05	0.000102224	6.23e-05	6.15e-05	5.26e-05	5.56e-05	8.66e-05	0.000104729	0.000107426	0.000153571	0.000130698	8.84e-05	0.000112378	0.000120382	0.000115687	9.36e-05	9.29e-05	7.98e-05	7.66e-05	9.66e-05	oligo-1,6-glucosidase [EC:3.2.1.10]	0.0227788	0.0135912
K01183	0.000106495	0.000160463	0.000143955	0.000116967	0.000165507	0.000161991	0.000133035	0.000160335	0.000123599	0.000107334	0.000122168	0.000153587	0.000123993	9.61e-05	0.000154098	0.000126215	0.000113188	0.000132148	0.000145057	0.00012507	0.000137124	0.00013268	0.000125199	0.000101765	0.000122616	0.000146731	chitinase [EC:3.2.1.14]	0.92204	0.912413
K01184	3.58e-06	4.08e-07	5.11e-06	2.77e-06	2.99e-06	3.1e-05	8.93e-06	4.83e-06	2.23e-06	5.68e-06	7.96e-06	4.62e-06	2.32e-06	3.33e-06	8.77e-06	6.29e-06	1.89e-06	1.42e-06	4.84e-06	1.72e-06	1.38e-06	1.85e-06	5.44e-06	1.41e-06	1.4e-06	9.98e-07	polygalacturonase [EC:3.2.1.15]	0.953066	0.0565886
K01185	0.000111613	6.33e-05	7.55e-05	0.000132324	0.00014393	7.82e-05	7.87e-05	6.96e-05	0.000127472	0.000136349	0.000149594	0.000139628	0.000123389	0.000106773	8.2e-05	8.14e-05	7.37e-05	0.000140726	6.69e-05	7.64e-05	6.93e-05	0.000119523	0.00011522	0.000137985	0.000148322	0.000138174	lysozyme [EC:3.2.1.17]	0.0214166	0.0431938
K01186	8.89e-06	1.77e-05	1.74e-05	1.11e-05	5.87e-06	2.1e-05	1.42e-05	1.87e-05	9.46e-06	7.4e-06	6.17e-06	7.08e-06	1.33e-05	8.24e-06	3.05e-05	1.53e-05	1.38e-05	9.54e-06	1.66e-05	1.52e-05	1.27e-05	1.12e-05	1.05e-05	7.98e-06	6.47e-06	1.84e-05	sialidase-1 [EC:3.2.1.18]	0.0463031	0.135047
K01187	0.000654487	0.000962484	0.00108598	0.000546192	0.000541217	0.000957034	0.000755125	0.000965218	0.000656826	0.000597019	0.0004586	0.000607203	0.000599854	0.000688099	0.00085623	0.00099217	0.00104007	0.000659081	0.000976582	0.0009332	0.000982378	0.000770477	0.000771626	0.000559735	0.000589743	0.000606202	alpha-glucosidase [EC:3.2.1.20]	0.0341087	0.0190735
K01190	0.000392206	0.000589875	0.000789008	0.000524552	0.00025261	0.000703067	0.000615962	0.000602785	0.000407429	0.000364706	0.000263741	0.000291338	0.000549975	0.00049164	0.000855937	0.000786243	0.000662819	0.000460777	0.000953109	0.000667035	0.000799013	0.000567418	0.000655803	0.000386714	0.000314831	0.000574685	beta-galactosidase [EC:3.2.1.23]	0.0285115	0.0457027
K01191	8.64e-05	0.000119617	0.000104133	0.000126058	0.000327328	9.3e-05	0.000122721	0.000105215	0.000157393	0.000163499	0.000218387	0.000271797	0.000131325	5.43e-05	6.2e-05	7.19e-05	9.51e-05	0.000215154	7.06e-05	9.69e-05	7.27e-05	0.000152484	0.000124938	0.000155211	0.000226916	0.000142136	alpha-mannosidase [EC:3.2.1.24]	0.0264229	0.0184401
K01192	7.12e-05	0.000103023	0.000148671	0.000203638	5.16e-05	0.000232479	0.00021598	0.00012174	6.57e-05	7.12e-05	6.38e-05	6.02e-05	0.0001968	0.000111263	0.000245899	0.000123372	0.000108706	7.25e-05	0.000288245	0.000137473	0.000181842	8.42e-05	0.000139937	6.86e-05	5.54e-05	0.000182092	beta-mannosidase [EC:3.2.1.25]	0.0878211	0.286763
K01193	0.00019152	4.21e-05	6.3e-05	0.00020995	0.000124431	7.5e-05	8.67e-05	7.64e-05	0.000233593	0.000254879	0.000232847	0.000161456	0.000190273	0.000165218	0.000112848	5.28e-05	5.57e-05	0.000163009	7.12e-05	6.15e-05	6.99e-05	0.000158085	0.000165481	0.000196742	0.00016512	0.000164926	beta-fructofuranosidase [EC:3.2.1.26]	0.0819158	0.0282133
K01194	6.92e-05	9.72e-05	0.000141282	7.2e-05	4.14e-05	0.000121904	7.68e-05	9.41e-05	6.77e-05	6.13e-05	4.07e-05	4.69e-05	7.94e-05	8.77e-05	0.000141326	0.000148343	0.000106246	7.59e-05	0.000118536	9.54e-05	0.000105589	9.68e-05	0.000104399	5.66e-05	4.95e-05	8.53e-05	alpha,alpha-trehalase [EC:3.2.1.28]	0.0242086	0.0205849
K01195	3.86e-05	4.98e-05	6.15e-05	3.13e-05	2.44e-05	5e-05	4.28e-05	5.19e-05	3.5e-05	3.39e-05	2.05e-05	2.55e-05	3.53e-05	5.59e-05	8.39e-05	8.29e-05	7.32e-05	5.21e-05	8.14e-05	7.45e-05	8.17e-05	6.79e-05	7.39e-05	4.2e-05	4.05e-05	5.21e-05	beta-glucuronidase [EC:3.2.1.31]	0.0356609	0.023006
K01197	1.01e-05	1.64e-05	2.32e-05	9.27e-06	8.05e-06	2.82e-05	1.38e-05	1.64e-05	8.97e-06	9.31e-06	6.58e-06	7.97e-06	1.06e-05	1.15e-05	1.94e-05	2.06e-05	1.42e-05	1.11e-05	1.68e-05	1.23e-05	1.55e-05	1.16e-05	1.67e-05	7.64e-06	8.11e-06	1.06e-05	hyaluronoglucosaminidase [EC:3.2.1.35]	0.0429477	0.0246679
K01198	4.44e-05	3.72e-05	5.39e-05	4e-05	2.33e-05	7.04e-05	5.04e-05	4.94e-05	3.37e-05	3.43e-05	2.8e-05	2.51e-05	4.27e-05	5.22e-05	6.49e-05	6.75e-05	4.65e-05	3.93e-05	6.77e-05	5.42e-05	6.06e-05	5.76e-05	6.6e-05	2.81e-05	2.95e-05	5.43e-05	xylan 1,4-beta-xylosidase [EC:3.2.1.37]	0.0606662	0.209536
K01199	1.73e-05	2.53e-05	3.15e-05	2.02e-05	1.21e-05	2.85e-05	2.15e-05	2.86e-05	1.88e-05	1.6e-05	1.17e-05	1.37e-05	2.33e-05	2.13e-05	4.69e-05	3.44e-05	2.9e-05	2.21e-05	3.52e-05	3.01e-05	3.23e-05	2.82e-05	3.07e-05	1.73e-05	1.51e-05	2.83e-05	glucan endo-1,3-beta-D-glucosidase [EC:3.2.1.39]	0.039974	0.0706004
K01200	7.08e-06	6.42e-06	1.3e-05	1.92e-05	1.22e-05	1.68e-05	1.8e-05	1.65e-05	6.2e-06	9.35e-06	6.9e-06	7.49e-06	1.71e-05	1.13e-05	2.22e-05	1.02e-05	1.12e-05	8.15e-06	2.35e-05	1.05e-05	1.4e-05	9.25e-06	1.53e-05	7.12e-06	7.43e-06	2.31e-05	pullulanase [EC:3.2.1.41]	0.611016	0.394263
K01201	4.98e-05	8.04e-05	0.000120265	7.45e-05	2.85e-05	8.81e-05	7.52e-05	7.29e-05	3.89e-05	3.58e-05	2.4e-05	2.87e-05	7.94e-05	6.2e-05	9.19e-05	0.000107515	7.73e-05	5.01e-05	0.000114408	7.6e-05	9.89e-05	5.35e-05	6.91e-05	3.61e-05	3.38e-05	8.23e-05	glucosylceramidase [EC:3.2.1.45]	0.0210884	0.0775515
K01205	1.37e-05	2.3e-05	3.17e-05	1.36e-05	8.41e-06	2.97e-05	1.86e-05	2.33e-05	1.19e-05	1.2e-05	7.18e-06	9.18e-06	1.61e-05	1.58e-05	3.44e-05	3.03e-05	2.51e-05	1.52e-05	2.68e-05	2.23e-05	2.77e-05	1.61e-05	2.32e-05	1.12e-05	1.02e-05	1.67e-05	alpha-N-acetylglucosaminidase [EC:3.2.1.50]	0.0245663	0.0296014
K01206	0.000192437	0.000265981	0.000445082	0.000535633	0.000129091	0.000585587	0.000610524	0.00035808	0.000193587	0.000179515	0.00013439	0.00013985	0.000507989	0.000324488	0.000515229	0.00042596	0.000325014	0.000247778	0.00091308	0.000471539	0.000591719	0.000308945	0.000426334	0.000195978	0.000160933	0.000506797	alpha-L-fucosidase [EC:3.2.1.51]	0.0717763	0.241023
K01207	0.000324744	0.00044963	0.00042054	0.000291318	0.000320064	0.000401553	0.00038467	0.000411156	0.000273585	0.000255398	0.000264095	0.000299024	0.000313492	0.000372075	0.000481232	0.000482716	0.000458963	0.000356905	0.000433445	0.000453223	0.000444551	0.000374888	0.00037274	0.000327686	0.000335169	0.00035132	beta-N-acetylhexosaminidase [EC:3.2.1.52]	0.0381699	0.00599055
K01208	8.98e-07	3.19e-07	4.79e-07	1.27e-06	1.22e-06	7.83e-07	4.17e-07	5.58e-07	6.04e-07	2.51e-06	2.96e-06	1.78e-06	1e-06	3.3e-08	3.52e-07	1.92e-07	8.15e-08	4.51e-08	9.2e-08	6.38e-08	6.62e-08	2.8e-08	8.08e-07	1.48e-07	1.85e-07	1.12e-07	cyclomaltodextrinase [EC:3.2.1.54]	0.0381699	0.711202
K01209	5.17e-05	6.87e-05	9.51e-05	6.29e-05	3.18e-05	8.03e-05	6.28e-05	6.98e-05	4.28e-05	4.76e-05	4.08e-05	3.68e-05	6.64e-05	5.47e-05	9.33e-05	8.45e-05	7.09e-05	4.44e-05	8.49e-05	6.22e-05	8.31e-05	5.08e-05	6.98e-05	3.88e-05	3.26e-05	6.81e-05	alpha-N-arabinofuranosidase [EC:3.2.1.55]	0.0390726	0.0389905
K01210	9.88e-07	6.34e-07	1.47e-06	5.93e-06	1.62e-06	5.1e-06	2.37e-06	3.24e-06	7.13e-07	1.79e-06	1.88e-06	9.98e-07	6.64e-06	2.57e-06	7.93e-06	2.67e-06	1.14e-06	1.04e-06	2.11e-06	1.01e-06	1.06e-06	1.08e-06	3.27e-06	1.6e-06	9.99e-07	6.19e-06	glucan 1,3-beta-glucosidase [EC:3.2.1.58]	0.72764	0.608793
K01212	5.41e-05	9.04e-05	0.000120107	5.86e-05	3.46e-05	8.47e-05	6.01e-05	7.99e-05	5.31e-05	5.12e-05	3.95e-05	4.13e-05	6.66e-05	5.69e-05	9.79e-05	0.000108939	8.43e-05	5.53e-05	8.52e-05	7e-05	8.17e-05	6.32e-05	7.02e-05	4.47e-05	3.58e-05	5.9e-05	levanase [EC:3.2.1.65]	0.020561	0.0213017
K01215	2.37e-05	3.11e-05	3.28e-05	2.07e-05	1.3e-05	2.27e-05	2.52e-05	2.8e-05	1.52e-05	1.47e-05	1.32e-05	1.31e-05	2.26e-05	2.3e-05	2.43e-05	2.95e-05	2.7e-05	1.74e-05	2.26e-05	2.58e-05	2.32e-05	1.84e-05	1.79e-05	1.71e-05	1.6e-05	2.25e-05	glucan 1,6-alpha-glucosidase [EC:3.2.1.70]	0.0181199	0.00632805
K01216	2.45e-06	4.24e-06	5.75e-06	2.2e-06	1.52e-06	4.63e-06	3.16e-06	4.21e-06	2.19e-06	2.05e-06	1.16e-06	1.59e-06	2.61e-06	2.73e-06	5.63e-06	5.44e-06	4.3e-06	2.6e-06	4.44e-06	3.84e-06	4.65e-06	2.77e-06	3.7e-06	1.8e-06	1.69e-06	3.11e-06	licheninase [EC:3.2.1.73]	0.0200245	0.022428
K01218	2.86e-05	3.95e-05	4.28e-05	3.12e-05	4.24e-05	5.41e-05	4.37e-05	4.4e-05	3.19e-05	3.46e-05	3.19e-05	3.88e-05	3.42e-05	3.68e-05	0.000117998	5.03e-05	5.23e-05	4.57e-05	6.05e-05	5.3e-05	5.27e-05	4.86e-05	5.73e-05	3.41e-05	3.96e-05	4.65e-05	mannan endo-1,4-beta-mannosidase [EC:3.2.1.78]	0.647164	0.126145
K01219	7.69e-06	1.53e-06	4.22e-05	0.000126868	1.01e-05	7.95e-05	0.000123118	3.28e-05	3.96e-06	6.9e-06	1.28e-05	4.89e-06	0.000107739	4.11e-05	1.62e-05	1.94e-05	1.09e-05	1.09e-05	0.000183263	5.39e-05	9.59e-05	8.44e-06	4.09e-05	1.55e-05	8.34e-06	0.000101775	agarase [EC:3.2.1.81]	0.755187	0.739183
K01220	1.78e-07	2.64e-07	2.62e-07	1.81e-06	5.12e-06	5.88e-07	6.82e-07	5.41e-07	1.96e-06	1.94e-06	3.07e-06	4.05e-06	1.8e-06	1.58e-07	1.24e-06	2.22e-07	6.33e-07	1.89e-06	2.22e-07	3.37e-07	1.75e-07	1.27e-06	1.04e-06	1.25e-06	2.08e-06	1.92e-06	6-phospho-beta-galactosidase [EC:3.2.1.85]	0.020561	0.0897775
K01222	2.33e-06	1.09e-06	1.69e-06	3.71e-06	2.39e-06	1.27e-06	8.8e-07	1.45e-06	1.28e-06	6.08e-06	5.54e-06	3.35e-06	2.95e-06	1.3e-06	4.69e-06	1.31e-06	6.42e-07	4.9e-07	6.76e-07	5.21e-07	4.05e-07	5.68e-07	2.35e-06	1.04e-06	8.74e-07	2.68e-06	6-phospho-beta-glucosidase [EC:3.2.1.86]	0.139699	0.692749
K01223	1.69e-05	2.21e-05	2.26e-05	1.34e-05	1.33e-05	1.58e-05	1.9e-05	2.07e-05	1.15e-05	1.86e-05	1.24e-05	1.22e-05	1.37e-05	1.96e-05	2.28e-05	2.47e-05	2.58e-05	1.7e-05	1.9e-05	2.27e-05	2.15e-05	1.73e-05	1.84e-05	1.71e-05	1.75e-05	1.77e-05	6-phospho-beta-glucosidase [EC:3.2.1.86]	0.0364627	0.00523274
K01224	1.59e-05	2.5e-05	3.74e-05	1.62e-05	9.48e-06	3.3e-05	1.85e-05	2.28e-05	1.61e-05	1.3e-05	1.08e-05	1.11e-05	1.81e-05	1.79e-05	2.55e-05	3.33e-05	2.21e-05	1.5e-05	2.23e-05	1.77e-05	1.82e-05	1.83e-05	1.65e-05	1.15e-05	1.06e-05	2.07e-05	arabinogalactan endo-1,4-beta-galactosidase [EC:3.2.1.89]	0.0227788	0.0400482
K01225	1.83e-06	1.04e-06	3.85e-06	2.52e-06	1.03e-06	1.66e-05	5.51e-06	4.11e-06	8.3e-07	1.78e-06	3e-06	1.73e-06	2.65e-06	1.43e-06	4.13e-06	2.97e-06	8.21e-07	5.84e-07	2e-06	6.37e-07	4.39e-07	9.27e-07	1.98e-06	5.19e-07	6.02e-07	3.07e-06	cellulose 1,4-beta-cellobiosidase [EC:3.2.1.91]	0.565491	0.220432
K01226	6.68e-05	9.44e-05	0.000109391	6.86e-05	6.48e-05	8.06e-05	7.53e-05	8.65e-05	5.85e-05	6.09e-05	5.56e-05	6.21e-05	7.44e-05	7.53e-05	8.65e-05	0.000109377	9.72e-05	7.77e-05	8.46e-05	8.79e-05	8.75e-05	7.75e-05	7.92e-05	6.71e-05	7.02e-05	8.09e-05	trehalose-6-phosphate hydrolase [EC:3.2.1.93]	0.0202643	0.0265309
K01227	2.78e-06	4.94e-06	6.91e-06	2.41e-06	1.4e-06	3.48e-06	2.37e-06	3.17e-06	1.85e-06	1.41e-06	9.79e-07	1.25e-06	2.83e-06	2.83e-06	2.89e-06	6.37e-06	3.69e-06	2.28e-06	3.3e-06	3.03e-06	2.69e-06	2.31e-06	1.56e-06	1.03e-06	1.42e-06	2.35e-06	mannosyl-glycoprotein endo-beta-N-acetylglucosaminidase [EC:3.2.1.96]	0.0259887	0.00742942
K01230	6.06e-08	5.83e-08	1.68e-09	0	0	4.06e-09	4.97e-09	2.63e-09	2.13e-08	8.25e-09	1.21e-07	5.76e-09	1.3e-09	2.17e-09	7.18e-08	2.13e-09	0	0	6.09e-09	1.94e-09	1.05e-09	4.75e-10	3.4e-09	7.77e-09	1.61e-09	1.07e-09	mannosyl-oligosaccharide alpha-1,2-mannosidase [EC:3.2.1.113]	0.908105	0.643085
K01232	4.77e-09	2.06e-08	7.98e-09	2.39e-08	1.51e-08	1.43e-08	5.73e-09	7.25e-08	1.38e-08	8.47e-07	1.73e-08	2.28e-08	3.43e-09	1.33e-07	6.63e-07	2.37e-08	8.08e-08	2e-08	4.06e-08	8.47e-09	2.04e-08	3.77e-08	8.35e-08	2.91e-08	4.47e-08	4.83e-08	maltose-6'-phosphate glucosidase [EC:3.2.1.122]	0.957987	0.561699
K01233	1.48e-07	9.57e-08	2.21e-07	1.19e-06	2.15e-07	8.13e-07	3.06e-07	4.24e-07	1.76e-07	3.72e-07	6.03e-07	2.99e-07	1.54e-06	4.57e-07	1.1e-06	3.18e-07	1.05e-07	1.54e-07	3.25e-07	1.89e-07	1.57e-07	2.27e-07	6.57e-07	3.66e-07	2.02e-07	1.11e-06	chitosanase [EC:3.2.1.132]	0.529873	0.846628
K01234	4.89e-06	8.63e-06	1.11e-05	2.84e-05	9.61e-05	1.6e-05	1.54e-05	1.12e-05	4.15e-05	3.71e-05	5.6e-05	7.78e-05	3e-05	5.88e-06	1.2e-05	1.09e-05	1.5e-05	6.27e-05	1.14e-05	1.47e-05	9.78e-06	4.15e-05	3.05e-05	3.91e-05	6.52e-05	4.13e-05	neopullulanase [EC:3.2.1.135]	0.0180541	0.046554
K01235	2.87e-05	3.58e-05	4.55e-05	2.46e-05	1.61e-05	5.36e-05	3.69e-05	4.47e-05	2.06e-05	2.16e-05	1.74e-05	1.7e-05	2.79e-05	2.89e-05	4.33e-05	4.13e-05	3.62e-05	2.21e-05	3.92e-05	3.33e-05	4.36e-05	2.51e-05	3.45e-05	1.79e-05	1.71e-05	2.97e-05	alpha-glucuronidase [EC:3.2.1.139]	0.0341087	0.0400482
K01236	0.000102521	0.000128717	0.000143966	9.03e-05	9.89e-05	0.000172335	0.000123203	0.000135316	9.43e-05	9.89e-05	9.31e-05	0.000102224	9.62e-05	0.000140775	0.000141505	0.000181308	0.000179492	0.000127411	0.000161725	0.00016567	0.00016149	0.000139183	0.000144171	0.000121819	0.00012662	0.000121624	maltooligosyltrehalose trehalohydrolase [EC:3.2.1.141]	0.113931	0.0163716
K01238	0.000167496	0.000238179	0.000299622	0.000177645	0.000100983	0.000209814	0.000172746	0.000219652	0.000162663	0.000139599	0.000104002	0.000122656	0.000181601	0.000199263	0.000312207	0.000300905	0.000276192	0.000169056	0.000259146	0.000232623	0.000249217	0.00021493	0.000221319	0.000164154	0.000137403	0.000215614	[EC:3.2.1.-]	0.020561	0.0163716
K01239	0.000301912	0.000245343	0.000239683	0.000242342	0.000190043	0.000187197	0.000249006	0.00023529	0.000249879	0.000273799	0.000251184	0.000201435	0.000230466	0.000338354	0.0002076	0.000302841	0.000319756	0.000287428	0.000251007	0.000307341	0.000286856	0.000286423	0.000281813	0.000330761	0.000302687	0.00025858	purine nucleosidase [EC:3.2.2.1]	0.945063	0.92111
K01241	0.000184827	0.000225542	0.000211888	0.00011771	0.000101798	0.000173257	0.000207957	0.000199032	9.63e-05	0.000108153	9.64e-05	9.1e-05	0.000120176	0.000213499	0.000203381	0.000251455	0.000254512	0.000152788	0.000196648	0.000240238	0.000216671	0.000158794	0.000162251	0.000171849	0.000160371	0.000149093	AMP nucleosidase [EC:3.2.2.4]	0.0195644	0.0134186
K01243	2.22e-05	2.66e-05	2.93e-05	4.8e-05	8.2e-05	4.59e-05	3.05e-05	3.5e-05	4.33e-05	4.44e-05	5.37e-05	6.7e-05	4.85e-05	2.63e-05	4.78e-05	3.08e-05	3.03e-05	5.02e-05	3.24e-05	2.81e-05	2.65e-05	4.28e-05	4.56e-05	4.01e-05	5.22e-05	5.21e-05	S-adenosylhomocysteine/5'-methylthioadenosine nucleosidase [EC:3.2.2.9]	0.0245663	0.178962
K01246	0.000246482	0.000237874	0.000245611	0.000222454	0.000141105	0.000233633	0.000219386	0.000237358	0.000229466	0.000229061	0.000195944	0.000172324	0.000219496	0.000227261	0.000229597	0.000217589	0.000214442	0.000189292	0.000229598	0.000211056	0.000224285	0.000211572	0.00022047	0.000204668	0.00017954	0.000202959	DNA-3-methyladenine glycosylase I [EC:3.2.2.20]	0.0504528	0.0953849
K01247	0.000149062	0.000115611	0.000124445	0.000134114	0.00010356	0.000123925	0.000125763	0.000118815	0.000127884	0.000141947	0.000132046	0.000105929	0.000129968	0.000157465	0.000111038	0.000142323	0.00013307	0.000130546	0.000116237	0.000129347	0.000124305	0.000131981	0.000137689	0.000147608	0.000134288	0.000130815	DNA-3-methyladenine glycosylase II [EC:3.2.2.21]	0.957987	0.631927
K01249	3.26e-05	6.3e-06	9.03e-06	3.78e-05	3.24e-05	1.41e-05	1.59e-05	1.23e-05	4.28e-05	4.61e-05	4.59e-05	3.62e-05	3.42e-05	3.12e-05	2.07e-05	1.16e-05	1.23e-05	3.74e-05	1.39e-05	1.4e-05	1.39e-05	3.31e-05	3.31e-05	4.1e-05	3.95e-05	3.51e-05	DNA glycosylase [EC:3.2.2.-]	0.0543821	0.0111357
K01250	0.000113079	0.000161707	0.000131402	6.36e-05	5.52e-05	0.000103554	0.000118889	0.000130444	7.16e-05	6.2e-05	5.53e-05	5.8e-05	6.62e-05	0.000116894	9.93e-05	0.000150048	0.000140729	9.34e-05	0.000133204	0.000151567	0.000148803	0.000109118	0.000103017	9.77e-05	8.92e-05	9.17e-05	pyrimidine-specific ribonucleoside hydrolase [EC:3.2.-.-]	0.0181199	0.0504773
K01251	0.000663831	0.000665588	0.000665452	0.000780554	0.000894575	0.000684291	0.0006807	0.000676502	0.000786254	0.000761406	0.000819899	0.00087357	0.000788892	0.000633762	0.000633252	0.000620493	0.00063342	0.000743099	0.000666453	0.000643037	0.000655609	0.000714121	0.000691223	0.000697641	0.000741971	0.000721279	adenosylhomocysteinase [EC:3.3.1.1]	0.0183363	0.00539781
K01252	1.3e-05	1.26e-05	1.59e-05	1.46e-05	7.54e-06	1.17e-05	1.08e-05	1.31e-05	5.1e-06	7.15e-06	7.32e-06	6.03e-06	1.2e-05	1.56e-05	1.79e-05	2.12e-05	1.51e-05	9.8e-06	1.24e-05	1.4e-05	1.29e-05	1.08e-05	1.27e-05	1.26e-05	1.11e-05	2.17e-05	bifunctional isochorismate lyase / aryl carrier protein [EC:3.3.2.1]	0.037419	0.109281
K01253	0.000172273	5.01e-05	5.68e-05	0.000192355	0.000116375	7.33e-05	9.13e-05	7.59e-05	0.000199281	0.000219341	0.000204641	0.000143887	0.00017323	0.000157015	0.000123226	5.68e-05	6.63e-05	0.000147741	7.41e-05	7.37e-05	7.34e-05	0.000142978	0.000151224	0.000182212	0.000155746	0.000154775	microsomal epoxide hydrolase [EC:3.3.2.9]	0.0517478	0.0400482
K01255	0.000836664	0.00068123	0.000640258	0.000872714	0.000982066	0.000619769	0.000736053	0.000687698	0.000868964	0.00090181	0.000976565	0.000940389	0.000855424	0.000810969	0.000719447	0.000671539	0.000698157	0.000871133	0.000602153	0.000711833	0.000665501	0.000794825	0.000772659	0.000897307	0.000919219	0.000836069	leucyl aminopeptidase [EC:3.4.11.1]	0.0252937	0.0477279
K01256	0.00120545	0.00113221	0.00111355	0.00126771	0.0014958	0.00113114	0.00110508	0.00114762	0.00140655	0.00138109	0.00144024	0.00148254	0.00126683	0.00112663	0.00113138	0.00106804	0.00107523	0.00129879	0.00106163	0.00107601	0.00108015	0.00125788	0.0012173	0.00124842	0.0012931	0.0012183	aminopeptidase N [EC:3.4.11.2]	0.0200245	0.0217723
K01258	0.000157052	0.000254828	0.000273733	0.000128565	9.3e-05	0.000247605	0.000186689	0.000241778	0.000159419	0.000138572	8.88e-05	0.000122621	0.000147865	0.000196882	0.000294805	0.000284867	0.000297043	0.000167246	0.000289241	0.000263558	0.000274502	0.000213488	0.000211526	0.000145486	0.00013863	0.000147687	tripeptide aminopeptidase [EC:3.4.11.4]	0.0245663	0.0172019
K01259	0.00032163	0.000312708	0.000323094	0.000324107	0.000361292	0.00033272	0.000317593	0.000323801	0.000344965	0.00035333	0.000351208	0.000357861	0.000326987	0.000349218	0.00034172	0.000352097	0.000379612	0.000352934	0.000330262	0.000352479	0.000343529	0.000353243	0.0003547	0.000356858	0.000357943	0.000335169	proline iminopeptidase [EC:3.4.11.5]	0.0181199	0.572304
K01261	1.1e-07	7.41e-08	1.02e-07	2.57e-08	1.47e-07	5.26e-07	1.64e-07	2.08e-07	5.57e-08	4.61e-07	9.45e-08	8.36e-08	1.14e-08	1.44e-07	1.23e-06	1.91e-07	4.33e-07	1.66e-08	1.6e-07	5.58e-08	2.85e-08	6.33e-08	2.49e-07	3.87e-08	7.97e-08	3.74e-08	glutamyl aminopeptidase [EC:3.4.11.7]	1	0.035319
K01262	0.000876573	0.000915376	0.000924441	0.00089471	0.000955938	0.000918739	0.000860089	0.000935528	0.000957717	0.000933614	0.000919082	0.000976049	0.000906351	0.000848279	0.000936718	0.000859056	0.000917664	0.000887785	0.000882369	0.000878809	0.000890208	0.00090513	0.000890262	0.000855316	0.000883975	0.000851995	Xaa-Pro aminopeptidase [EC:3.4.11.9]	0.205992	0.583499
K01263	2.44e-06	8.1e-07	4.75e-06	2.12e-06	3.04e-06	2.69e-05	8.02e-06	5e-06	2.08e-06	3.11e-06	4.44e-06	3.39e-06	1.85e-06	3.54e-06	9.75e-06	4.72e-06	1.48e-06	2.21e-06	4.08e-06	1.58e-06	8.28e-07	2.65e-06	5.76e-06	1.45e-06	2.13e-06	3.54e-06	cytosol alanyl aminopeptidase [EC:3.4.11.14]	0.935326	0.418927
K01264	1.04e-06	1.13e-06	2.05e-06	1.38e-06	2.59e-06	6.31e-06	2.56e-06	3.38e-06	1.37e-06	1.62e-06	2.15e-06	2.07e-06	1.3e-06	9.02e-07	4.17e-06	2.17e-06	1.26e-06	1.62e-06	1.84e-06	9.05e-07	7.62e-07	1.36e-06	1.37e-06	1.41e-06	1.63e-06	1.91e-06	aminopeptidase Y [EC:3.4.11.15]	0.633068	0.85719
K01265	0.000373216	0.000399425	0.000409617	0.000419903	0.000440602	0.000410311	0.000396241	0.000402954	0.000399707	0.00039217	0.000410309	0.000432903	0.000426812	0.000388583	0.000436769	0.000417351	0.000407483	0.000416146	0.000423048	0.000406973	0.000416237	0.00041018	0.00041007	0.000391913	0.000408021	0.000421427	methionyl aminopeptidase [EC:3.4.11.18]	0.341665	0.658967
K01266	0.000144973	0.0001814	0.000180659	0.000109985	8.06e-05	0.000133546	0.000154237	0.000162446	7.84e-05	8.57e-05	7.86e-05	7.36e-05	0.00010829	0.000162602	0.000142233	0.000204051	0.000192437	0.000122125	0.000156252	0.000183758	0.000173866	0.000128816	0.000135614	0.000139127	0.000125273	0.00014492	D-aminopeptidase [EC:3.4.11.19]	0.0183363	0.0282133
K01267	2.76e-06	8.19e-07	2.96e-06	6.2e-06	4.75e-06	1.14e-05	4.37e-06	6.76e-06	1.71e-06	5.37e-06	6.34e-06	3.78e-06	7.25e-06	3.65e-06	1.45e-05	4.89e-06	2.02e-06	1.17e-06	3.54e-06	1.43e-06	1.51e-06	9.49e-07	4.09e-06	1.57e-06	1.5e-06	6.99e-06	aspartyl aminopeptidase [EC:3.4.11.21]	0.281265	0.282489
K01269	0.000204311	0.000291018	0.000331077	0.000226929	0.000166848	0.000310216	0.000250902	0.000294029	0.000218392	0.000187306	0.000150947	0.000190182	0.000238548	0.000221883	0.000352987	0.000316299	0.000305615	0.000213002	0.000354897	0.000289712	0.000321707	0.000264566	0.000276358	0.000183224	0.000175444	0.000251581	aminopeptidase [EC:3.4.11.-]	0.0259887	0.0400482
K01270	0.000216489	0.000358059	0.000342245	0.000153274	0.000109032	0.000332629	0.000246835	0.000324279	0.000208967	0.000165797	0.000109529	0.000152304	0.000176532	0.000199968	0.000349802	0.000302765	0.00028926	0.000167418	0.00033701	0.000285621	0.000313337	0.00023748	0.000236094	0.000136443	0.000123912	0.000161089	dipeptidase D [EC:3.4.13.-]	0.0210884	0.0251615
K01271	0.000568882	0.000242161	0.000274976	0.000577179	0.000360869	0.000293795	0.00033209	0.000316405	0.0006155	0.000665068	0.000600677	0.000440684	0.000522155	0.000533832	0.000353941	0.00028063	0.000306609	0.00047648	0.000299698	0.00031314	0.000317274	0.000479278	0.000495772	0.000576993	0.000498443	0.000487855	Xaa-Pro dipeptidase [EC:3.4.13.9]	0.0819158	0.0515087
K01273	0.000409549	0.000322492	0.000344674	0.000377878	0.000249863	0.000310546	0.000341161	0.000339872	0.000381961	0.000401702	0.000355563	0.000283408	0.000367354	0.00043699	0.000356885	0.000392403	0.000395609	0.000379037	0.000368867	0.000383112	0.000386484	0.000398471	0.000409343	0.00042455	0.000371032	0.000367908	membrane dipeptidase [EC:3.4.13.19]	0.99272	0.692749
K01274	6.43e-06	9.13e-06	8.14e-06	4.02e-06	3.63e-06	5.02e-06	7.47e-06	7.58e-06	3.55e-06	4.17e-06	3.6e-06	3.46e-06	4.08e-06	9.31e-06	6.21e-06	1.13e-05	1.27e-05	7.42e-06	8.85e-06	1.15e-05	1.04e-05	7.76e-06	7.16e-06	8.27e-06	7.95e-06	6.55e-06	D-alanyl-D-alanine dipeptidase [EC:3.4.13.-]	0.0270661	0.181607
K01277	0.00016036	0.000275357	0.000200858	0.000105351	6.13e-05	0.000207618	0.000189587	0.000215903	0.000125811	8.67e-05	7.84e-05	8.76e-05	0.000120152	0.000100511	0.000270452	0.00014342	0.000144427	8.15e-05	0.000177689	0.000163058	0.000176487	0.000108941	0.000107573	9.01e-05	5.97e-05	0.000103004	dipeptidyl-peptidase III [EC:3.4.14.4]	0.0242086	0.0431938
K01278	0.000573993	0.000967586	0.000845656	0.000403514	0.000269168	0.000851894	0.000652289	0.000823949	0.000481014	0.000366073	0.000285571	0.000364606	0.000458085	0.000480676	0.000847292	0.000713607	0.000640668	0.000374825	0.000772255	0.000674889	0.000736134	0.000505174	0.000498086	0.000322374	0.000287162	0.000434175	dipeptidyl-peptidase 4 [EC:3.4.14.5]	0.0200245	0.0251615
K01281	5.3e-05	9.03e-05	0.000103588	6.33e-05	3.54e-05	9.64e-05	6.7e-05	9.07e-05	6.45e-05	5.62e-05	4.03e-05	4.5e-05	7.6e-05	5.56e-05	0.00011253	9.64e-05	9.38e-05	6.27e-05	9.7e-05	7.62e-05	9.27e-05	7.54e-05	8.59e-05	5.56e-05	4.05e-05	5.79e-05	X-Pro dipeptidyl-peptidase [EC:3.4.14.11]	0.0701017	0.0477029
K01283	0.000109508	0.000167924	9.65e-05	4.31e-05	4.35e-05	0.000117559	0.000110902	0.000125998	6.06e-05	3.33e-05	4.83e-05	5.06e-05	4.23e-05	5.03e-05	5.14e-05	5.82e-05	3.55e-05	2.64e-05	6.87e-05	7.59e-05	8.71e-05	3.77e-05	2.83e-05	3.6e-05	2.8e-05	5.32e-05	peptidyl-dipeptidase A [EC:3.4.15.1]	0.0911963	0.203255
K01284	0.000757879	0.00112082	0.00114291	0.000645687	0.000647855	0.00104347	0.000868795	0.00104849	0.000736557	0.000636795	0.000549491	0.000698396	0.000693652	0.000757382	0.000811321	0.00106037	0.00104763	0.00071119	0.00107504	0.000992638	0.001057	0.000841482	0.000810887	0.00062757	0.000640304	0.000678579	peptidyl-dipeptidase Dcp [EC:3.4.15.5]	0.0270661	0.0444791
K01286	0.000559037	0.000563	0.000501079	0.000478667	0.000310307	0.000405936	0.000482798	0.000512681	0.000422227	0.000419831	0.000413323	0.000347377	0.000469784	0.000513718	0.000422113	0.000497117	0.000476185	0.000417854	0.000439121	0.000497626	0.000492983	0.000442547	0.000437666	0.000482293	0.000428417	0.000493448	D-alanyl-D-alanine carboxypeptidase [EC:3.4.16.4]	0.0302368	0.513628
K01289	3.01e-05	4.37e-05	5.85e-05	3.18e-05	1.79e-05	5.13e-05	3.5e-05	4.33e-05	3.19e-05	2.72e-05	1.95e-05	2.2e-05	3.61e-05	3.58e-05	6.17e-05	5.95e-05	4.91e-05	3.37e-05	5.08e-05	4.19e-05	4.87e-05	4.24e-05	4.57e-05	2.74e-05	2.24e-05	3.77e-05	carboxypeptidase [EC:3.4.16.-]	0.0415279	0.0282133
K01295	5.78e-05	7e-05	8.27e-05	4.64e-05	3.4e-05	9.11e-05	6.85e-05	7.36e-05	4.65e-05	4.41e-05	3.63e-05	3.55e-05	5.2e-05	8.51e-05	0.000106464	0.00011919	0.000104131	7.14e-05	9.93e-05	9.91e-05	9.75e-05	8.58e-05	8.63e-05	6.63e-05	5.97e-05	6.19e-05	glutamate carboxypeptidase [EC:3.4.17.11]	0.040597	0.0110106
K01297	0.000150987	0.000239644	0.000234452	0.00017421	0.000348059	0.000263945	0.000195621	0.000227512	0.000244218	0.000208112	0.000232303	0.000321489	0.000190173	0.000146234	0.000258432	0.000213974	0.000214395	0.000245125	0.000233559	0.000208582	0.000216932	0.000238332	0.000216024	0.000172831	0.000227406	0.000196389	muramoyltetrapeptide carboxypeptidase [EC:3.4.17.13]	0.605138	0.907298
K01299	0.000207584	0.000269418	0.000242799	0.000211905	0.000503779	0.000181721	0.000267081	0.000238537	0.000262937	0.000257912	0.000322499	0.000410318	0.000222188	0.000222835	0.00020964	0.000260959	0.000300822	0.000338737	0.000212948	0.000285281	0.000246798	0.000278878	0.000238794	0.000290788	0.000357555	0.0002351	carboxypeptidase Taq [EC:3.4.17.19]	0.356409	0.37941
K01301	5.38e-06	1.45e-05	8.86e-06	1.23e-05	2.16e-05	1.86e-05	1.46e-05	1.99e-05	1.14e-05	1.23e-05	1.63e-05	1.97e-05	1.27e-05	2.27e-06	9.91e-06	3.78e-06	1.22e-05	1.13e-05	1.55e-05	1.25e-05	1.58e-05	9.3e-06	1.15e-05	1.05e-05	1.19e-05	1.24e-05	glutamate carboxypeptidase II [EC:3.4.17.21]	0.309368	0.825369
K01303	9.78e-06	1.13e-05	1.29e-05	2.07e-05	4.27e-05	3.27e-05	1.72e-05	1.57e-05	2.28e-05	2.2e-05	3.06e-05	3.71e-05	2.18e-05	8.81e-06	2.92e-05	1.1e-05	1.2e-05	2.55e-05	1.23e-05	1.02e-05	9.15e-06	1.97e-05	1.92e-05	1.76e-05	2.53e-05	2.08e-05	acylaminoacyl-peptidase [EC:3.4.19.1]	0.0270661	0.320435
K01304	1.25e-06	5.62e-07	1.22e-06	3.18e-06	7.3e-06	6.28e-06	2.68e-06	2.14e-06	3.05e-06	4.41e-06	6.11e-06	6.07e-06	3.01e-06	1.72e-06	4.61e-06	1.86e-06	1.61e-06	3.02e-06	2.01e-06	9.56e-07	7.53e-07	2.43e-06	3.51e-06	2.55e-06	3.27e-06	3.13e-06	pyroglutamyl-peptidase [EC:3.4.19.3]	0.0334316	0.361093
K01305	3.08e-06	4.24e-06	4.14e-06	2.14e-06	1.95e-06	3.46e-06	3.99e-06	4.27e-06	1.91e-06	2.69e-06	1.71e-06	1.75e-06	2.18e-06	5.95e-06	4.8e-06	7.36e-06	7.68e-06	4.62e-06	5.89e-06	7.33e-06	6.44e-06	4.79e-06	4.66e-06	4.84e-06	4.73e-06	3.74e-06	beta-aspartyl-dipeptidase (metallo-type) [EC:3.4.19.-]	0.0320055	0.0265309
K01308	2.13e-06	1.01e-06	1.59e-06	8.68e-07	9.09e-07	1.41e-06	1.79e-06	1.65e-06	9.71e-07	1.05e-06	8.7e-07	7.03e-07	1.01e-06	2.08e-06	8.53e-07	1.95e-06	1.18e-06	8.2e-07	7.61e-07	1.11e-06	1.45e-06	8.46e-07	9.96e-07	4.59e-07	6.09e-07	6.15e-07	g-D-glutamyl-meso-diaminopimelate peptidase [EC:3.4.19.11]	0.282763	0.0400482
K01312	5.09e-08	7.28e-08	9.34e-08	2.97e-07	2.99e-08	5.14e-08	6.52e-08	1.01e-07	2.95e-08	8.14e-08	1.55e-07	5.56e-08	2.43e-07	5.84e-08	3.93e-07	3.8e-08	2.33e-08	5.09e-08	6.4e-08	5.42e-08	4.72e-08	6.68e-08	1.33e-07	1.42e-07	6.91e-08	6.34e-07	trypsin [EC:3.4.21.4]	0.881182	0.226707
K01317	4.82e-06	5.66e-06	5.62e-06	4.52e-06	5.55e-06	5.85e-06	5.99e-06	5.4e-06	3.73e-06	4.11e-06	4.5e-06	4.76e-06	4.94e-06	6.8e-06	4.99e-06	7.94e-06	8.26e-06	7.24e-06	6.22e-06	7.79e-06	6.94e-06	6.69e-06	6.93e-06	7.03e-06	7.71e-06	7.02e-06	acrosin [EC:3.4.21.10]	0.147612	0.840905
K01318	3.01e-05	5.2e-05	3.69e-05	1.63e-05	1.15e-05	4.15e-05	3.49e-05	3.79e-05	1.82e-05	1.26e-05	1.31e-05	1.46e-05	1.81e-05	2.18e-05	4.71e-05	3.1e-05	2.35e-05	1.41e-05	3.33e-05	3.02e-05	3.15e-05	1.83e-05	1.71e-05	1.34e-05	1.15e-05	1.99e-05	glutamyl endopeptidase [EC:3.4.21.19]	0.0270661	0.0184401
K01322	0.000365338	0.000582036	0.000539563	0.000294568	0.000272733	0.000583633	0.000425568	0.000546398	0.000375348	0.00030717	0.000253697	0.000332529	0.000323175	0.000310076	0.000605448	0.000439745	0.000456445	0.000292083	0.000524578	0.000449779	0.000498398	0.000380691	0.00038724	0.000245142	0.000241669	0.00030554	prolyl oligopeptidase [EC:3.4.21.26]	0.0504528	0.0296014
K01338	0.00124963	0.00121333	0.00120164	0.00121705	0.000904571	0.0011776	0.00112081	0.00121792	0.00118017	0.00116985	0.0011047	0.00101542	0.00123222	0.00122122	0.00135635	0.00117759	0.00115851	0.00107032	0.00115845	0.0011512	0.00117382	0.00114365	0.00116104	0.00112775	0.00104846	0.00114128	ATP-dependent Lon protease [EC:3.4.21.53]	0.26391	0.023006
K01342	4.02e-06	7.45e-06	4.22e-06	6.39e-06	1.72e-05	1.06e-05	1.07e-05	6.78e-06	7.42e-06	7.92e-06	1.04e-05	1.44e-05	6.64e-06	4.05e-06	3.09e-05	3.45e-06	7.69e-06	7.64e-06	8.19e-06	7.99e-06	4.69e-06	5.47e-06	6.37e-06	5.55e-06	8.12e-06	6.89e-06	subtilisin [EC:3.4.21.62]	0.255812	0.739183
K01347	1.89e-06	5.73e-07	3.44e-07	1.13e-06	3.08e-07	9.8e-07	7.2e-07	7.56e-07	9.84e-07	3.04e-06	2e-06	7.82e-07	2.3e-06	1.72e-05	4.23e-06	1.44e-06	1.02e-08	3.14e-06	2.12e-06	4.23e-06	3.23e-06	5.34e-06	1.67e-05	5.26e-06	2.22e-06	6.75e-06	IgA-specific serine endopeptidase [EC:3.4.21.72]	0.25991	0.245775
K01354	0.000412887	0.000636732	0.000612715	0.000352415	0.00024607	0.000625654	0.00045125	0.000592872	0.000367038	0.000301496	0.000246176	0.000300803	0.000373471	0.000355245	0.000666957	0.000523862	0.00048123	0.000293566	0.000557626	0.000476747	0.000527147	0.000393026	0.000400814	0.000257142	0.000235194	0.000370651	oligopeptidase B [EC:3.4.21.83]	0.020561	0.0319227
K01355	2.24e-09	1.43e-08	1.53e-08	1.93e-08	2.97e-09	1.76e-08	5.72e-09	5.71e-08	2.09e-09	5.88e-07	4.85e-09	3.9e-09	1.18e-08	1.77e-08	7.14e-08	5.16e-09	9.35e-08	1.16e-08	1.43e-08	8.33e-09	5.04e-08	9.39e-09	1.62e-08	1.98e-08	6.1e-09	5.36e-08	omptin [EC:3.4.23.49]	0.427704	0.978214
K01356	0.000194521	0.000176907	0.000176611	0.000227037	0.00030399	0.000182944	0.000206316	0.000178853	0.000221789	0.0002257	0.000257317	0.000270083	0.000220727	0.000197223	0.000152223	0.000186672	0.000183007	0.000236778	0.000185047	0.000192306	0.000185933	0.000209339	0.000203276	0.000228312	0.000246614	0.000229416	repressor LexA [EC:3.4.21.88]	0.0312238	0.0146673
K01358	0.000361371	0.0004261	0.000442664	0.000541053	0.00096511	0.000488819	0.000466402	0.000454483	0.0006079	0.000568287	0.000684486	0.000856779	0.000557068	0.000373306	0.000443722	0.000428693	0.000471004	0.000651003	0.000480116	0.000462996	0.000458538	0.000568869	0.000519895	0.00051731	0.000654115	0.000551301	ATP-dependent Clp protease, protease subunit [EC:3.4.21.92]	0.0180541	0.0201835
K01361	5.25e-05	8.77e-05	7.75e-05	4.23e-05	3.03e-05	8.6e-05	6.79e-05	8.1e-05	4.82e-05	3.76e-05	2.9e-05	3.98e-05	4.44e-05	4.57e-05	6.35e-05	6e-05	6.13e-05	3.51e-05	8.7e-05	6.67e-05	7.64e-05	4.97e-05	4.95e-05	2.97e-05	3.07e-05	4.24e-05	lactocepin [EC:3.4.21.96]	0.02204	0.0444791
K01362	0.00121946	0.00114556	0.00117808	0.00135667	0.00150685	0.00117983	0.00122798	0.00115776	0.00130034	0.00131019	0.00139378	0.00142526	0.00133126	0.0012395	0.00126013	0.00120319	0.00118152	0.00137283	0.00121334	0.00120526	0.00119191	0.00129463	0.00128773	0.00132971	0.00138994	0.00142225	[EC:3.4.21.-]	0.0350517	0.022428
K01364	4.16e-06	7.24e-06	1.04e-05	3.76e-06	1.99e-06	5.23e-06	3.55e-06	4.76e-06	2.9e-06	2.03e-06	1.46e-06	1.91e-06	4.41e-06	4.25e-06	3.14e-06	9.55e-06	4.79e-06	3.44e-06	4.91e-06	4.53e-06	4.03e-06	3.57e-06	2.21e-06	1.53e-06	2.1e-06	4.39e-06	streptopain [EC:3.4.22.10]	0.0259887	0.0932776
K01372	0.000153037	0.000266371	0.000182584	8.21e-05	4.93e-05	0.00018417	0.000168176	0.000199918	9.97e-05	6.41e-05	6.24e-05	7e-05	9.19e-05	9.9e-05	0.000193158	0.000141316	0.000118813	6.83e-05	0.00016485	0.000153301	0.000166245	9.27e-05	8.58e-05	7.32e-05	5.37e-05	9.45e-05	bleomycin hydrolase [EC:3.4.22.40]	0.0242086	0.0236379
K01376	0	1.21e-10	0	0	7.46e-09	0	0	1.34e-09	0	7.6e-09	0	0	0	0	8.87e-08	0	4.76e-08	0	6.51e-11	1.01e-10	0	6.9e-09	1.57e-08	0	9.08e-09	0	[EC:3.4.22.-]	0.704952	0.29894
K01387	0.000137211	0.000233335	0.000128452	5.76e-05	3.77e-05	0.000156013	0.000156299	0.000171321	7.28e-05	4.29e-05	5.14e-05	5.5e-05	5.96e-05	6.96e-05	0.000197565	7.98e-05	7.19e-05	3.4e-05	0.000119978	0.000122861	0.000123628	5.3e-05	5e-05	4.85e-05	3.25e-05	7.61e-05	microbial collagenase [EC:3.4.24.3]	0.0341087	0.0422235
K01389	4.64e-09	5.92e-10	2.24e-08	7.01e-08	3.54e-09	5.22e-10	1.69e-08	1.38e-07	8.6e-09	1.1e-07	8.66e-08	2.53e-08	2.54e-08	4.47e-09	5.06e-08	2.3e-09	3.18e-09	1.9e-09	3.9e-09	1.38e-08	1.41e-08	3.24e-09	2.5e-08	5.28e-09	6.93e-09	7.34e-08	neprilysin [EC:3.4.24.11]	0.499161	0.880914
K01390	0	7.25e-08	0	0	4.66e-08	0	0	0	0	3.2e-08	0	0	0	0	3.61e-07	0	2.58e-07	0	2.26e-08	0	0	3.74e-08	4.53e-08	0	2.62e-08	0	IgA-specific metalloendopeptidase [EC:3.4.24.13]	0.957987	0.441747
K01392	2.34e-07	7.95e-08	1.68e-07	1.58e-06	5.99e-07	1.92e-07	1.9e-07	1.05e-06	1.18e-07	2.63e-07	7.53e-07	1.72e-07	9.7e-07	3.06e-07	1.47e-06	1.32e-07	9.33e-08	1.54e-07	2.46e-07	1.46e-07	2.07e-07	2.34e-07	3.93e-07	5.65e-07	3.25e-07	4.01e-06	thimet oligopeptidase [EC:3.4.24.15]	0.312407	0.247973
K01399	2.65e-07	1.44e-07	6.55e-07	1.46e-07	4.4e-07	2.92e-06	8.67e-07	1.33e-06	1.27e-07	3.32e-07	3.06e-07	1.99e-07	1.43e-07	4.74e-07	1.7e-06	1.03e-06	1.12e-06	7.37e-08	6.93e-07	2.22e-07	5.66e-07	8.69e-08	2.6e-07	1.49e-07	9.11e-08	3.81e-07	pseudolysin [EC:3.4.24.26]	0.816115	0.016814
K01400	6.07e-05	9.36e-05	8.63e-05	3.24e-05	2.98e-05	9.58e-05	6.36e-05	9.01e-05	6.03e-05	4.55e-05	2.85e-05	4.54e-05	3.59e-05	4.85e-05	5.75e-05	6.67e-05	7.05e-05	3.53e-05	8.37e-05	7.17e-05	8.05e-05	5.83e-05	5.46e-05	2.83e-05	2.96e-05	3.27e-05	bacillolysin [EC:3.4.24.28]	0.039974	0.0737966
K01401	2.45e-06	3.82e-06	3.9e-06	3.39e-06	1.61e-06	4.66e-06	3.15e-06	4.23e-06	3.29e-06	2.85e-06	1.96e-06	2.27e-06	4.4e-06	2.02e-06	4.13e-06	3.18e-06	3.5e-06	2.16e-06	3.32e-06	2.83e-06	3.12e-06	2.93e-06	3.14e-06	1.85e-06	1.56e-06	3.35e-06	aureolysin [EC:3.4.24.29]	0.239949	0.164577
K01406	0.000193275	0.000243437	0.000238904	0.000140852	0.00015573	0.000171566	0.000218903	0.00021619	0.000135516	0.000138145	0.000129109	0.00013797	0.000156327	0.000215392	0.000154637	0.000257763	0.000268468	0.000190752	0.000201422	0.000247567	0.00022967	0.000189287	0.000181639	0.000195819	0.000193281	0.000166928	serralysin [EC:3.4.24.40]	0.0204235	0.181607
K01407	3.17e-05	5.62e-05	4.07e-05	1.58e-05	1.18e-05	4.37e-05	3.34e-05	4.8e-05	2.39e-05	1.81e-05	1.31e-05	1.8e-05	1.75e-05	2.24e-05	2.75e-05	2.79e-05	2.7e-05	1.36e-05	3.76e-05	3.32e-05	3.72e-05	2.11e-05	1.83e-05	1.39e-05	1.27e-05	1.84e-05	protease III [EC:3.4.24.55]	0.0356609	0.0378932
K01408	5.16e-08	1.81e-08	7.25e-08	6.55e-08	1.82e-07	6.77e-08	6.03e-08	2.94e-07	2.44e-08	2.62e-08	2.56e-08	3.29e-08	4.01e-08	3.1e-07	1.3e-06	4.62e-08	8.27e-08	6.23e-08	1.64e-07	4.46e-08	6.19e-08	1.04e-07	2.13e-07	6.58e-08	8.74e-08	1.59e-07	insulysin [EC:3.4.24.56]	0.765322	0.96737
K01409	0.000523368	0.000488406	0.000488061	0.000583936	0.000591492	0.000479975	0.000498138	0.000497662	0.000568163	0.000566943	0.00058958	0.000589969	0.000582482	0.000510026	0.000533447	0.000478334	0.000481278	0.000547614	0.000492169	0.000486867	0.000490974	0.000533218	0.00052915	0.000538948	0.00054781	0.000553528	O-sialoglycoprotein endopeptidase [EC:3.4.24.57]	0.037419	0.0301087
K01412	0.000214305	0.000229136	0.000222825	0.000172902	0.000145819	0.000139454	0.000207927	0.000203239	0.000142387	0.000155294	0.000149672	0.000136131	0.000168183	0.000235445	0.000182437	0.00025528	0.000260917	0.000195288	0.000200408	0.000248128	0.000229779	0.000194761	0.000191925	0.000217625	0.000206023	0.000199295	mitochondrial processing peptidase [EC:3.4.24.64]	0.0356609	0.241023
K01414	0.000306202	0.000447913	0.000465961	0.000519454	0.000818462	0.000574535	0.000466202	0.000482244	0.000518382	0.000450126	0.000574514	0.000749346	0.000557509	0.000298585	0.000381015	0.000395886	0.000397888	0.000508001	0.000489944	0.00040548	0.000440788	0.00046241	0.000429442	0.000380544	0.0004965	0.000482986	oligopeptidase A [EC:3.4.24.70]	0.0819158	0.209536
K01415	2.83e-05	4.57e-05	4.35e-05	2.14e-05	1.24e-05	4.15e-05	2.97e-05	3.91e-05	1.86e-05	1.43e-05	1.35e-05	1.39e-05	2.31e-05	3.12e-05	4.68e-05	4.24e-05	3.12e-05	2.07e-05	4.08e-05	3.33e-05	3.84e-05	2.54e-05	2.53e-05	1.83e-05	1.59e-05	2.55e-05	endothelin-converting enzyme [EC:3.4.24.71]	0.0180541	0.0134186
K01416	2.34e-08	3.59e-08	5.32e-08	1.96e-08	4.47e-09	2.61e-08	3.53e-08	4.89e-08	5.58e-09	2.88e-08	2.04e-08	1.66e-08	7.85e-09	0	2.97e-08	9.05e-09	5.48e-09	1.15e-09	0	4.55e-09	5.84e-09	1.64e-09	6.99e-09	1.26e-09	3.58e-09	1.94e-08	snapalysin [EC:3.4.24.77]	0.039974	0.3747
K01417	0.000394678	0.00044178	0.000457826	0.000528122	0.000901822	0.00047878	0.00044287	0.000462346	0.000584478	0.000557252	0.000662569	0.000809643	0.000540055	0.000391495	0.000568594	0.000451602	0.000471267	0.000681344	0.000436042	0.000460103	0.000435532	0.000595917	0.0005417	0.000543576	0.000695379	0.00060793	[EC:3.4.24.-]	0.0180541	0.144683
K01419	8.76e-05	0.000100647	0.000100768	6.51e-05	5.21e-05	8.29e-05	9.3e-05	9.41e-05	4.55e-05	5.03e-05	4.74e-05	4.3e-05	6.45e-05	0.00010171	0.000104202	0.000118542	0.000114151	7.14e-05	8.74e-05	0.00010721	9.82e-05	7.44e-05	7.66e-05	8.04e-05	7.45e-05	7.81e-05	ATP-dependent HslUV protease, peptidase subunit HslV [EC:3.4.25.2]	0.0183775	0.00775544
K01420	0.000423341	0.000621141	0.000546125	0.000312135	0.000399967	0.000521586	0.000506063	0.000542027	0.0003677	0.000327972	0.000316579	0.000390906	0.000338577	0.000419218	0.000573599	0.000538333	0.000551888	0.000410477	0.000527445	0.000550835	0.000534184	0.000435543	0.000415465	0.00037661	0.000393988	0.00037426	CRP/FNR family transcriptional regulator, anaerobic regulatory protein	0.0803656	0.00563271
K01421	1.16e-05	1.19e-05	1.2e-05	9.46e-06	8.95e-06	9.52e-06	1.11e-05	1.18e-05	6.66e-06	1.46e-05	1.5e-05	1.04e-05	8.35e-06	1.56e-05	1.42e-05	1.88e-05	2.07e-05	1.2e-05	1.45e-05	1.87e-05	1.68e-05	1.25e-05	1.48e-05	1.35e-05	1.3e-05	9.86e-06	putative membrane protein	0.698789	0.022428
K01422	0.000635384	0.000680709	0.000638617	0.000514639	0.000366104	0.000485752	0.000613282	0.000623652	0.000446694	0.000462697	0.0004327	0.000383126	0.000514941	0.000644737	0.000493863	0.000669291	0.000682446	0.00050556	0.000579212	0.000668642	0.00064681	0.000528418	0.000528654	0.000576056	0.000525684	0.000537208	[EC:3.4.99.-]	0.0183363	0.200176
K01423	0.000270944	0.00035149	0.000409142	0.000458608	0.000971719	0.000484474	0.00037299	0.000371999	0.000584174	0.000531673	0.000655085	0.000849943	0.000486259	0.000305417	0.000464264	0.000417221	0.000419947	0.00065262	0.000396544	0.000378917	0.000375011	0.000551908	0.000498038	0.000484393	0.00063364	0.000514436	[EC:3.4.-.-]	0.0183363	0.0706004
K01424	0.000266043	0.000393645	0.000383526	0.000278837	0.000448879	0.000401608	0.00032429	0.00037091	0.000328791	0.00029071	0.00031957	0.000414741	0.000297755	0.00029756	0.000410203	0.000412347	0.000391919	0.000382056	0.000398484	0.000385908	0.000387157	0.000381492	0.000358899	0.000307791	0.000360953	0.000339184	L-asparaginase [EC:3.5.1.1]	0.973923	0.0327794
K01425	0.000163067	0.0002359	0.000236129	0.000147436	0.000111365	0.000215303	0.000197771	0.000224247	0.000142602	0.000121924	0.000101022	0.000122651	0.000150612	0.000143915	0.000167245	0.000197704	0.000190277	0.0001242	0.000227692	0.000190315	0.000215384	0.00015436	0.000159256	0.0001155	0.000109036	0.000148453	glutaminase [EC:3.5.1.2]	0.0180541	0.0671996
K01426	0.000531327	0.000574751	0.000612897	0.000464617	0.000412635	0.000586612	0.000541909	0.000576236	0.000457321	0.000470065	0.000431607	0.000422582	0.000462766	0.00059842	0.000541065	0.000682714	0.000682835	0.000526477	0.000603224	0.000635522	0.000624327	0.000566409	0.000578244	0.00054913	0.000525465	0.00052321	amidase [EC:3.5.1.4]	0.0214166	0.0565886
K01428	0.000294364	0.000356171	0.000358312	0.000346238	0.000567711	0.000313643	0.000398704	0.000347695	0.000310619	0.000314992	0.000385414	0.000466405	0.000345321	0.000322572	0.000243208	0.000378043	0.000388731	0.000420778	0.000359696	0.000389594	0.000361838	0.000357474	0.000338501	0.000375544	0.000446858	0.00039486	urease subunit alpha [EC:3.5.1.5]	0.881182	0.442949
K01429	4.73e-05	5.78e-05	5.72e-05	4.79e-05	7.46e-05	4.79e-05	6.1e-05	5.54e-05	4.35e-05	4.45e-05	5.18e-05	6.14e-05	4.78e-05	4.15e-05	3.29e-05	4.94e-05	5.01e-05	5.08e-05	4.58e-05	4.96e-05	4.6e-05	4.41e-05	4.21e-05	4.65e-05	5.41e-05	4.87e-05	urease subunit beta [EC:3.5.1.5]	0.761371	0.722729
K01430	5.73e-05	6.98e-05	6.94e-05	6.21e-05	0.000101953	5.94e-05	7.34e-05	6.67e-05	5.69e-05	5.81e-05	7e-05	8.38e-05	6.2e-05	5.97e-05	4.75e-05	7.16e-05	7.27e-05	7.76e-05	6.28e-05	7.15e-05	6.49e-05	6.63e-05	6.26e-05	7.01e-05	8.27e-05	7.23e-05	urease subunit gamma [EC:3.5.1.5]	0.949653	0.502312
K01431	0.00022026	0.000172691	0.000170599	0.00017793	0.000128044	0.000125297	0.000174049	0.000166327	0.000179036	0.000194816	0.000176032	0.000137877	0.000168136	0.000234347	0.000141351	0.000201851	0.00020808	0.000192164	0.000166933	0.000202979	0.000191297	0.000193407	0.000193407	0.000225842	0.000201874	0.000182405	beta-ureidopropionase [EC:3.5.1.6]	0.867258	0.988524
K01432	2.46e-05	3.21e-05	3.53e-05	2.22e-05	1.41e-05	3.58e-05	2.83e-05	3.06e-05	2.04e-05	1.95e-05	1.68e-05	1.6e-05	2.48e-05	2.84e-05	3.06e-05	3.75e-05	3.62e-05	2.34e-05	3.17e-05	3.14e-05	3.26e-05	2.71e-05	2.89e-05	2.49e-05	2.06e-05	2.39e-05	arylformamidase [EC:3.5.1.9]	0.0312238	0.0201835
K01433	0.000123158	0.00015498	0.000186812	0.000183856	0.000307372	0.000221398	0.000184703	0.000179841	0.000192693	0.00018234	0.000210748	0.000272555	0.000189082	0.00015723	0.000187441	0.00020398	0.00021044	0.000227393	0.000224522	0.000201215	0.000206186	0.000211262	0.000207624	0.000182308	0.000225376	0.000210977	formyltetrahydrofolate deformylase [EC:3.5.1.10]	0.0970362	0.30713
K01434	0.00039193	0.000516202	0.000513262	0.00026706	0.000239125	0.00043372	0.000450414	0.000467018	0.000250301	0.000255631	0.000221653	0.000225195	0.000289505	0.000468196	0.000413223	0.00060818	0.000569249	0.000374327	0.000495028	0.000548101	0.000518988	0.000409145	0.000400162	0.000375782	0.000355711	0.000353942	penicillin amidase [EC:3.5.1.11]	0.0181199	0.0146673
K01436	0.000657225	0.000853581	0.000816862	0.000584171	0.000730697	0.000690824	0.000748259	0.000767605	0.000627829	0.000594315	0.000597267	0.00068807	0.00060479	0.000663633	0.000717621	0.00081542	0.000833991	0.000712706	0.000766168	0.000811828	0.000788131	0.000717043	0.000684296	0.000663793	0.00069539	0.000648216	amidohydrolase [EC:3.5.1.-]	0.165965	0.0361475
K01437	1.37e-06	6.71e-07	7.6e-07	5.86e-05	0.000235262	2.06e-05	2.5e-05	9.08e-06	9.12e-05	8.37e-05	0.000133336	0.000187108	6.07e-05	1.78e-06	5.66e-06	3.36e-06	1.3e-05	0.000101193	6.5e-06	1.46e-05	5.68e-06	6.24e-05	4.45e-05	6.11e-05	0.000107948	6.04e-05	aspartoacylase [EC:3.5.1.15]	0.0171139	0.0184401
K01438	0.000662923	0.000531019	0.000541263	0.000569871	0.000388476	0.000517074	0.000541875	0.000549131	0.000617736	0.000637799	0.000562155	0.000459402	0.000549126	0.000603523	0.000476924	0.000495887	0.000503615	0.000508134	0.000497445	0.000502545	0.000511434	0.000543315	0.000547689	0.000574367	0.000506173	0.000491672	acetylornithine deacetylase [EC:3.5.1.16]	0.937898	0.161771
K01439	0.000605219	0.000495466	0.000477571	0.000549017	0.000353808	0.000417796	0.000504572	0.000492123	0.000497814	0.000534685	0.000508454	0.000397877	0.000534531	0.000596829	0.000466877	0.000497367	0.000511188	0.000480576	0.000445228	0.000509176	0.000493307	0.00048927	0.000500251	0.000567691	0.000501347	0.000501442	succinyl-diaminopimelate desuccinylase [EC:3.5.1.18]	0.937898	0.863172
K01442	1.6e-05	1.58e-05	2.05e-05	2.88e-05	3.86e-05	1.88e-05	1.79e-05	2.08e-05	1.75e-05	1.84e-05	2.56e-05	2.95e-05	2.61e-05	2.01e-05	3.91e-05	2.71e-05	2.45e-05	3.04e-05	2.14e-05	2.19e-05	1.92e-05	2.59e-05	2.73e-05	2.77e-05	3.14e-05	4.25e-05	choloylglycine hydrolase [EC:3.5.1.24]	0.212867	0.37941
K01443	0.000219804	0.000290461	0.000287048	0.000191338	0.000310714	0.000262017	0.000268458	0.000276387	0.000218225	0.00021523	0.000224233	0.000277639	0.000198494	0.000237055	0.000228428	0.000298344	0.000327433	0.000283414	0.000266349	0.000303064	0.000281189	0.000270295	0.000252059	0.000253099	0.000291633	0.000230896	N-acetylglucosamine-6-phosphate deacetylase [EC:3.5.1.25]	0.686626	0.513628
K01444	8.67e-05	0.000141675	0.000160842	7.97e-05	5.61e-05	0.000163097	0.000111096	0.000141842	0.000104391	8.94e-05	5.51e-05	7.84e-05	9.21e-05	9.05e-05	0.000202242	0.000144468	0.000156401	8.73e-05	0.000162661	0.000132564	0.000147845	0.000120286	0.000128613	6.92e-05	6.29e-05	7.81e-05	N4-(beta-N-acetylglucosaminyl)-L-asparaginase [EC:3.5.1.26]	0.0819158	0.022428
K01446	0	5.23e-08	1.81e-10	7.95e-11	2.82e-08	8.99e-11	0	1.38e-08	6.47e-10	1.87e-08	4.01e-10	3.33e-10	0	1.75e-10	3.69e-07	0	1.95e-07	0	2.45e-08	4.02e-09	1.08e-10	2.82e-08	3.79e-08	3.88e-09	2.18e-08	9.47e-09	N-acetylmuramoyl-L-alanine amidase [EC:3.5.1.28]	0.65512	0.606246
K01447	0.000105006	0.000131636	0.000136551	8.06e-05	5.95e-05	0.000112561	0.000111349	0.000118384	5.83e-05	6.11e-05	5.57e-05	5.31e-05	8.06e-05	0.0001119	0.000113949	0.0001419	0.000126687	8.14e-05	0.000108069	0.000119887	0.000114628	8.65e-05	8.99e-05	8.74e-05	7.97e-05	9e-05	N-acetylmuramoyl-L-alanine amidase [EC:3.5.1.28]	0.0189877	0.0134186
K01448	0.000614642	0.000618724	0.000618307	0.000649634	0.000716214	0.000669801	0.000620799	0.000623695	0.000708007	0.00069157	0.000689545	0.000718705	0.000651261	0.000608667	0.000686327	0.000606651	0.000608069	0.000685518	0.000664161	0.000619497	0.000632682	0.000681245	0.000677672	0.000647184	0.000667998	0.000660551	N-acetylmuramoyl-L-alanine amidase [EC:3.5.1.28]	0.020561	0.244515
K01449	4.58e-05	5.64e-05	5.39e-05	3.26e-05	2.59e-05	3.5e-05	4.78e-05	4.8e-05	2.4e-05	2.61e-05	2.44e-05	2.31e-05	3.23e-05	5.03e-05	3.57e-05	6.1e-05	6.1e-05	3.85e-05	4.53e-05	5.76e-05	5.26e-05	3.98e-05	3.91e-05	4.37e-05	4.08e-05	4.09e-05	N-acetylmuramoyl-L-alanine amidase [EC:3.5.1.28]	0.0183363	0.179729
K01451	0.000684897	0.000676732	0.000636774	0.000560812	0.000620174	0.000561715	0.000670398	0.000630128	0.000595278	0.000622651	0.000620331	0.000593609	0.000556054	0.000783697	0.00059861	0.000788665	0.000827241	0.000731481	0.00066347	0.000798481	0.000737433	0.000709817	0.000685574	0.000777542	0.000764055	0.00064653	hippurate hydrolase [EC:3.5.1.32]	0.23195	0.418986
K01452	0.000325369	0.000238073	0.000236963	0.000266003	0.000196324	0.000193738	0.00025413	0.000238439	0.000279908	0.000304012	0.000275889	0.000214209	0.00025114	0.000291146	0.000180001	0.000220483	0.000228621	0.000247609	0.000191963	0.000224919	0.000214553	0.000246228	0.000248732	0.00029379	0.000260174	0.000234268	chitin deacetylase [EC:3.5.1.41]	0.826496	0.0565886
K01453	0.000261256	0.00014667	0.000170574	0.000257055	0.000164193	0.000145699	0.00016874	0.000166045	0.000250646	0.000268625	0.000247709	0.000187817	0.000238291	0.000248652	0.000186949	0.000185046	0.000157397	0.000218185	0.000157878	0.000162429	0.000163277	0.000221588	0.000227801	0.000247358	0.000218608	0.000244748	[EC:3.5.1.46]	0.656436	0.0893125
K01454	0.000156044	0.000128267	0.000126238	0.000137777	0.000116408	0.000112388	0.000134601	0.000126355	0.000135095	0.000146636	0.000138631	0.000116203	0.000133247	0.000160568	0.000106855	0.000138164	0.000142711	0.00014275	0.000117348	0.000139362	0.000129482	0.000139922	0.000141894	0.000161453	0.000150378	0.000136831	[EC:3.5.1.48]	0.871863	0.209536
K01455	0.000245268	0.000201329	0.000195353	0.000192061	0.000171307	0.000150369	0.00021074	0.000197988	0.000206183	0.00022156	0.000204105	0.00017298	0.000188119	0.000204347	0.000117624	0.00016214	0.000174497	0.000189762	0.000140152	0.000171166	0.000161855	0.000181802	0.000177882	0.000209608	0.000198198	0.000164017	formamidase [EC:3.5.1.49]	0.85816	0.102025
K01457	0.000295325	0.000196661	0.00021386	0.000302526	0.000211447	0.000223131	0.00026234	0.00022044	0.00027929	0.000309058	0.000292217	0.000228377	0.000286008	0.000295464	0.000198686	0.000218851	0.000222395	0.000258311	0.000244304	0.00023167	0.000234622	0.000253615	0.00027007	0.000298919	0.000268209	0.00027095	allophanate hydrolase [EC:3.5.1.54]	0.553134	0.0150581
K01458	0.000100401	0.000119187	0.000117456	6.8e-05	5.59e-05	9.76e-05	0.00010958	0.000106998	5.3e-05	5.9e-05	5.54e-05	5.02e-05	6.79e-05	0.000120127	8.83e-05	0.000144959	0.000140254	8.7e-05	0.000107791	0.000131671	0.000120812	9.15e-05	9.36e-05	0.000100206	9.21e-05	8.88e-05	N-formylglutamate deformylase [EC:3.5.1.68]	0.0180541	0.109281
K01459	0.000162709	0.000134654	0.000130579	0.000138726	0.000133321	9.58e-05	0.000136962	0.000128521	0.000143391	0.000153317	0.000147998	0.000130515	0.000134117	0.000184372	0.000106685	0.000166397	0.000176909	0.000170266	0.000136744	0.000171456	0.000159373	0.000163855	0.000157804	0.000186146	0.000178846	0.000149457	[EC:3.5.1.77]	0.789848	0.692749
K01460	3.52e-06	4.4e-06	4.07e-06	1.98e-06	2.06e-06	2.53e-06	3.92e-06	3.96e-06	1.95e-06	3.62e-06	1.75e-06	1.76e-06	2.07e-06	8.24e-06	5.24e-06	9.59e-06	1.04e-05	6.28e-06	7.41e-06	9.59e-06	8.86e-06	6.48e-06	5.94e-06	6.84e-06	6.6e-06	4.62e-06	glutathionylspermidine amidase/synthetase [EC:3.5.1.78 6.3.1.8]	0.039974	0.131932
K01461	0.000100391	5.87e-05	5.94e-05	8.6e-05	5.99e-05	5.53e-05	7.12e-05	6.47e-05	9.63e-05	0.000103869	9.39e-05	6.96e-05	8.1e-05	8.99e-05	5.25e-05	5.58e-05	6.13e-05	7.85e-05	5.36e-05	6.08e-05	5.93e-05	7.78e-05	7.79e-05	9.46e-05	8.19e-05	7.04e-05	N-acyl-D-glutamate deacylase [EC:3.5.1.82]	0.317022	0.0378932
K01462	0.000375761	0.000398966	0.000392562	0.000382776	0.000424526	0.00038008	0.000389242	0.00039511	0.000386356	0.000381022	0.000393225	0.000415573	0.00038866	0.000386224	0.000397081	0.000397645	0.000414038	0.000402473	0.000392515	0.000407017	0.000401041	0.000395781	0.000385353	0.000389927	0.000406217	0.000381043	peptide deformylase [EC:3.5.1.88]	0.749889	0.258661
K01463	0.000562735	0.000445643	0.000439455	0.000505545	0.000342065	0.000407115	0.000438343	0.000440623	0.000490013	0.000515448	0.000483847	0.000387584	0.000479191	0.000514445	0.000416964	0.000421917	0.000403914	0.000423721	0.000380941	0.000410196	0.000406467	0.000439053	0.000454211	0.000500195	0.00043868	0.000470317	[EC:3.5.1.-]	0.982405	0.116339
K01464	0.000330264	0.00042328	0.00039556	0.000200181	0.000188706	0.000266745	0.000360878	0.000363752	0.0001864	0.000198025	0.000170612	0.000171145	0.000206577	0.000350537	0.00022784	0.000421025	0.000439711	0.000269365	0.000329844	0.000412081	0.000379475	0.000283634	0.000273079	0.000299434	0.000282833	0.000237869	dihydropyrimidinase [EC:3.5.2.2]	0.0183363	0.166906
K01465	0.00121266	0.00126593	0.00126775	0.00125283	0.00123964	0.00124122	0.00119906	0.00125814	0.00129738	0.00125606	0.00122502	0.00127202	0.0012582	0.00117005	0.00124728	0.00118934	0.00122133	0.00120909	0.00126388	0.00121119	0.00124351	0.00124183	0.00122829	0.00117876	0.00118599	0.00120026	dihydroorotase [EC:3.5.2.3]	0.889107	0.536312
K01466	2.92e-05	4.32e-05	3.76e-05	2.24e-05	2.48e-05	3.07e-05	3.78e-05	3.5e-05	1.93e-05	2.23e-05	2.15e-05	2.3e-05	2.27e-05	2.39e-05	3.41e-05	2.93e-05	3.38e-05	2.36e-05	2.65e-05	3.21e-05	2.7e-05	2.29e-05	2.27e-05	2.52e-05	2.57e-05	2.34e-05	allantoinase [EC:3.5.2.5]	0.0302368	0.0150581
K01467	0.000399891	0.000366356	0.000372414	0.000396553	0.000453633	0.000476838	0.000387554	0.000401842	0.000471038	0.000466518	0.000460051	0.00046842	0.000397453	0.000373321	0.000436856	0.000348125	0.000377352	0.000428229	0.000379455	0.000364717	0.000369735	0.000427196	0.000426443	0.000412432	0.000425977	0.000388971	beta-lactamase [EC:3.5.2.6]	0.0543821	0.203255
K01468	0.000520562	0.000519993	0.000506521	0.000442432	0.00028896	0.000499012	0.000469988	0.000503851	0.000478341	0.000467154	0.00039653	0.000357334	0.00043759	0.000495359	0.000545681	0.000481891	0.000481676	0.000407709	0.000511222	0.000481879	0.000503309	0.00046271	0.00047328	0.000438239	0.00038679	0.000427888	imidazolonepropionase [EC:3.5.2.7]	0.0293651	0.0258566
K01469	0.000634351	0.000217956	0.000254721	0.000749042	0.000715915	0.000297564	0.00036482	0.000300031	0.000814871	0.000872091	0.000887897	0.000749329	0.000682463	0.000579916	0.000376555	0.000265612	0.000288353	0.000731206	0.000286921	0.00031304	0.000298213	0.000640274	0.000631197	0.000778636	0.000774704	0.000693489	5-oxoprolinase (ATP-hydrolysing) [EC:3.5.2.9]	0.0235099	0.0134186
K01470	9.96e-05	0.000124048	0.000128356	0.000157552	0.000321489	0.000119874	0.000146837	0.000123369	0.000156755	0.000153761	0.000205929	0.000262743	0.000157905	0.000128544	0.000110705	0.000160992	0.000168495	0.000229021	0.000147908	0.000168052	0.000150631	0.000181328	0.000163368	0.000187178	0.000239883	0.000193887	creatinine amidohydrolase [EC:3.5.2.10]	0.055932	0.0400482
K01471	4.53e-06	5.01e-06	5.17e-06	4.35e-06	2.53e-06	6.28e-06	5.13e-06	4.97e-06	2.61e-06	3.06e-06	3.22e-06	2.53e-06	4.21e-06	7e-06	7.29e-06	7.91e-06	6.84e-06	4.4e-06	6.36e-06	6.65e-06	6.15e-06	5.1e-06	5.82e-06	5.41e-06	4.74e-06	6.35e-06	6-aminohexanoate-cyclic-dimer hydrolase [EC:3.5.2.12]	0.0242009	0.00657205
K01473	0.000604724	0.000653636	0.000615455	0.000429407	0.000432852	0.000432979	0.000608859	0.000584503	0.000425102	0.000453373	0.000427075	0.000402535	0.000430456	0.000785053	0.00046822	0.000852581	0.000907687	0.000669602	0.000667599	0.000853426	0.000783749	0.000664861	0.000628171	0.000724433	0.000705234	0.000556441	N-methylhydantoinase A [EC:3.5.2.14]	0.039974	0.29107
K01474	0.000541209	0.000514918	0.000487888	0.000410907	0.000379065	0.000352638	0.000497741	0.000471966	0.000422947	0.000453547	0.000423038	0.00037289	0.000402312	0.000671893	0.000393806	0.000669819	0.000719168	0.000577229	0.000538594	0.000680368	0.000628863	0.000572404	0.000546647	0.000638677	0.000607573	0.000485179	N-methylhydantoinase B [EC:3.5.2.14]	0.147612	0.442949
K01476	0.000156067	0.00021302	0.000164995	8.39e-05	6.88e-05	0.000165809	0.000176854	0.000173225	7.85e-05	7.4e-05	7.32e-05	7.07e-05	8.49e-05	0.000147744	0.000189689	0.000174088	0.000170602	9.81e-05	0.000157569	0.00018311	0.000171703	0.000108344	0.000109525	0.000115349	0.00010219	0.000110669	arginase [EC:3.5.3.1]	0.0231784	0.0135711
K01477	0.000120528	1.53e-05	2.63e-05	0.00012855	7.3e-05	4.92e-05	5.18e-05	4.08e-05	0.000146587	0.000160999	0.000147404	9.86e-05	0.000114326	0.000105491	6.56e-05	2.33e-05	2.38e-05	9.72e-05	3.8e-05	3.06e-05	3.55e-05	9.39e-05	0.000100992	0.000123412	0.000101783	9.84e-05	allantoicase [EC:3.5.3.4]	0.0730417	0.0371495
K01478	3.63e-05	4.21e-05	4.22e-05	2.29e-05	2.07e-05	3.55e-05	3.95e-05	4.1e-05	1.92e-05	2.32e-05	1.93e-05	1.82e-05	2.35e-05	2.67e-05	3.12e-05	3.21e-05	2.82e-05	1.75e-05	2.36e-05	2.63e-05	2.43e-05	1.88e-05	2.16e-05	2.04e-05	1.9e-05	2.36e-05	arginine deiminase [EC:3.5.3.6]	0.0293651	0.00545091
K01479	0.000208665	0.000311989	0.000286007	0.000137538	0.000104262	0.000274791	0.000230948	0.000277604	0.000162028	0.000136069	0.00010496	0.000127892	0.000149932	0.000180643	0.000248839	0.000247521	0.000239186	0.000135831	0.000250327	0.000235176	0.000248729	0.000177206	0.000174855	0.000129964	0.00011829	0.000146014	formiminoglutamase [EC:3.5.3.8]	0.0183363	0.0190735
K01480	0.00091264	0.000742254	0.000730571	0.000848607	0.000829934	0.00063906	0.000738981	0.000742062	0.000960032	0.000975989	0.000930281	0.000857752	0.000820587	0.000837071	0.000639315	0.000685489	0.000716272	0.000855783	0.000663652	0.000712657	0.00070498	0.000841453	0.000815908	0.000897608	0.000866334	0.000774437	agmatinase [EC:3.5.3.11]	0.120845	0.0184401
K01481	4.47e-10	0	1.06e-08	1.08e-08	5.47e-08	2.2e-08	0	2.56e-08	4.84e-10	1.31e-08	5.36e-09	7.75e-10	7.03e-09	7.24e-10	5.04e-08	0	0	1.16e-07	2.96e-08	1.77e-08	2.62e-09	1.42e-09	9.12e-08	6.65e-09	3.22e-08	1.01e-07	protein-arginine deiminase [EC:3.5.3.15]	0.408882	0.148035
K01482	1.69e-05	1.88e-05	1.84e-05	1.11e-05	1.02e-05	1.31e-05	1.7e-05	1.73e-05	8.93e-06	1.31e-05	1.18e-05	1e-05	1.11e-05	2.56e-05	1.8e-05	3.06e-05	3.14e-05	1.9e-05	2.3e-05	2.9e-05	2.67e-05	1.98e-05	2.12e-05	2.14e-05	2.04e-05	1.68e-05	dimethylargininase [EC:3.5.3.18]	0.040597	0.124128
K01483	7.75e-05	6.09e-05	6.19e-05	6.27e-05	4.8e-05	5.25e-05	6.36e-05	6.05e-05	6.27e-05	6.85e-05	6.29e-05	5.03e-05	5.92e-05	8.53e-05	5.69e-05	7.68e-05	7.64e-05	7.02e-05	6.24e-05	7.4e-05	6.95e-05	7.01e-05	7.08e-05	8.14e-05	7.38e-05	6.75e-05	ureidoglycolate hydrolase [EC:3.5.3.19]	0.707884	0.907298
K01484	9.08e-06	4.28e-06	7.44e-06	6.09e-06	5.59e-06	1.56e-05	9.1e-06	1.06e-05	4.06e-06	6.21e-06	5.61e-06	3.65e-06	6.23e-06	1.22e-05	2.16e-05	1.18e-05	5.81e-06	4.09e-06	7.65e-06	5.17e-06	6.55e-06	4.62e-06	7.74e-06	3.65e-06	3.55e-06	7.34e-06	succinylarginine dihydrolase [EC:3.5.3.23]	0.50482	0.0737966
K01485	0.000313276	0.000415324	0.000393332	0.000309353	0.000593186	0.000369288	0.000397788	0.000381509	0.00035842	0.000345896	0.000404616	0.000506081	0.000324415	0.000352445	0.000340399	0.000439298	0.000459281	0.000466073	0.000384732	0.000442836	0.000406305	0.000417953	0.000380254	0.000403563	0.000477332	0.000369318	cytosine deaminase [EC:3.5.4.1]	0.7849	0.867993
K01486	0.000381989	0.000520338	0.000503153	0.000279163	0.000213671	0.000376807	0.000440439	0.000465899	0.000259436	0.000249687	0.000200008	0.000225719	0.000283547	0.000433979	0.000316237	0.000530036	0.000570284	0.000329669	0.000506646	0.000539631	0.000536596	0.00037457	0.000364886	0.000352929	0.000335892	0.000331698	adenine deaminase [EC:3.5.4.2]	0.0180133	0.178962
K01487	0.000277779	0.000354359	0.000322721	0.000184007	0.000160198	0.000264776	0.000305731	0.000309038	0.000163284	0.000163928	0.000153357	0.000150163	0.000187264	0.000318447	0.000244904	0.000386663	0.000373108	0.000241398	0.000320535	0.000369128	0.000354236	0.000258896	0.00025573	0.000264285	0.000246501	0.000242567	guanine deaminase [EC:3.5.4.3]	0.0183363	0.079429
K01488	8.89e-05	0.000111557	0.000124469	9.82e-05	0.000104188	0.000132257	0.000126466	0.000115743	7.9e-05	8.52e-05	8.87e-05	9.42e-05	9.74e-05	0.000119073	0.000120774	0.000149238	0.000144862	0.00011959	0.000156302	0.000144691	0.000143139	0.000123194	0.000127055	0.000111954	0.000117738	0.000122454	adenosine deaminase [EC:3.5.4.4]	0.0993311	0.124128
K01489	0.000146026	0.000168598	0.000176446	0.000130404	9.61e-05	0.000149044	0.000156573	0.000161291	0.000129796	0.000132531	0.000108041	0.000106994	0.000133326	0.000172764	0.00016165	0.000193579	0.000200814	0.00014772	0.000198972	0.000190696	0.000194087	0.000162605	0.000165143	0.000148072	0.000140106	0.000135525	cytidine deaminase [EC:3.5.4.5]	0.0204235	0.0640097
K01491	0.000548889	0.000489078	0.000489493	0.000580974	0.000572199	0.000480861	0.000505814	0.000505218	0.000588757	0.00059044	0.000595228	0.00058133	0.000577206	0.00053546	0.000508704	0.000480577	0.000497301	0.000557783	0.00049558	0.000498947	0.000500368	0.000548275	0.000540291	0.000560524	0.000562047	0.000541908	methylenetetrahydrofolate dehydrogenase (NADP+) / methenyltetrahydrofolate cyclohydrolase [EC:1.5.1.5 3.5.4.9]	0.037419	0.0155448
K01492	0	8.2e-11	0	0	1.21e-09	9.12e-09	0	3.51e-08	0	3.58e-09	0	0	0	0	1.16e-07	0	0	0	8.5e-09	4.05e-09	5.94e-09	1.13e-08	0	2.35e-10	0	2.45e-09	phosphoribosylaminoimidazolecarboxamide formyltransferase [EC:2.1.2.3]	0.912556	0.826505
K01493	6.97e-05	0.000114823	0.000107709	6.98e-05	3.28e-05	0.000105073	8.39e-05	0.000105817	6.23e-05	4.85e-05	4.15e-05	5.11e-05	7.85e-05	6.21e-05	0.000102663	8.75e-05	8.54e-05	4.73e-05	0.000104958	8.58e-05	9.7e-05	6.52e-05	6.58e-05	4.13e-05	3.74e-05	5.94e-05	dCMP deaminase [EC:3.5.4.12]	0.0183363	0.0311764
K01494	0.000291265	0.000185536	0.00019327	0.000308847	0.000358068	0.000179816	0.000227751	0.000202844	0.000329052	0.000348968	0.000364842	0.000341275	0.000294479	0.000284356	0.000202263	0.000209331	0.000220156	0.000324452	0.000183559	0.000219745	0.000203428	0.0002905	0.00028185	0.000335091	0.000341943	0.000296681	dCTP deaminase [EC:3.5.4.13]	0.0183775	0.0251615
K01495	0.000269303	0.000287279	0.000309989	0.000314237	0.000379289	0.000341794	0.000259042	0.000308113	0.000373863	0.000348978	0.000342526	0.000384746	0.000320041	0.000251547	0.000353847	0.000282658	0.000280321	0.000323662	0.000308287	0.000265108	0.000289815	0.000336717	0.00033158	0.000278964	0.000297833	0.000301138	GTP cyclohydrolase I [EC:3.5.4.16]	0.0320055	0.653193
K01496	0.000109732	0.000109694	9.63e-05	0.000145134	0.000200398	0.000106892	0.000125317	0.000112647	0.00013457	0.000130691	0.000163215	0.000178864	0.000146188	0.000107656	9.27e-05	9.74e-05	0.000103708	0.000144288	0.000106042	0.000113836	0.0001093	0.000123093	0.000115216	0.000134861	0.000153232	0.000138932	phosphoribosyl-AMP cyclohydrolase [EC:3.5.4.19]	0.0204235	0.00632805
K01497	0.000167384	0.000116169	0.000107525	0.000155934	0.000152584	0.000127596	0.000137856	0.000122282	0.000174517	0.000185933	0.000184192	0.000158884	0.000148467	0.000165525	0.000155756	0.000118457	0.000129174	0.00016105	0.000118007	0.000132727	0.000124117	0.000153153	0.000152499	0.000177996	0.000169471	0.000147654	GTP cyclohydrolase II [EC:3.5.4.25]	0.0574676	0.170129
K01498	1.1e-11	1.2e-10	1.56e-09	0	2.91e-10	3.75e-11	0	1.52e-09	0	0	0	0	0	2.4e-10	3.53e-09	0	0	0	1.01e-09	0	2.83e-09	1.27e-10	0	0	5.14e-11	6.12e-10	diaminohydroxyphosphoribosylaminopyrimidine deaminase [EC:3.5.4.26]	0.344166	0.664627
K01499	8.06e-07	3.84e-07	8.11e-07	5.54e-06	5.03e-07	2.99e-06	1.32e-06	8.06e-07	5.58e-07	1.54e-06	1.53e-06	6.9e-07	6.18e-06	1.52e-06	3.28e-06	1.3e-06	4.92e-07	6.18e-07	1.09e-06	5.9e-07	5.47e-07	8.2e-07	2.72e-06	1.15e-06	5.09e-07	4.9e-06	methenyltetrahydromethanopterin cyclohydrolase [EC:3.5.4.27]	0.897564	0.886247
K01500	0.00011353	0.000160661	0.000154619	0.00011364	0.000123574	0.000151051	0.000141509	0.000150658	0.000107853	9.76e-05	0.000100771	0.000122083	0.000119486	0.000118797	0.000140886	0.000153437	0.000154322	0.000120361	0.000159182	0.000152327	0.000156071	0.000127027	0.00012409	0.000108492	0.00011648	0.000122749	[EC:3.5.4.-]	0.0639091	0.0756735
K01501	0.000244317	0.000216086	0.000229714	0.000275082	0.000384212	0.000227219	0.000236547	0.000225622	0.000311763	0.000313287	0.000332496	0.000356435	0.000275298	0.000245732	0.00020734	0.000233074	0.000240424	0.000316569	0.000223303	0.000234917	0.000225363	0.000292243	0.00028081	0.000293949	0.000318881	0.000273668	nitrilase [EC:3.5.5.1]	0.0192648	0.0195548
K01502	3.07e-05	4.7e-05	4.82e-05	3.57e-05	6.94e-05	4.1e-05	4.05e-05	3.91e-05	3.98e-05	3.94e-05	4.73e-05	5.83e-05	3.81e-05	2.85e-05	2.64e-05	4.35e-05	3.95e-05	5.56e-05	3.49e-05	3.66e-05	3.44e-05	4.7e-05	4.25e-05	4.34e-05	5.53e-05	4.08e-05	aliphatic nitrilase [EC:3.5.5.7]	0.771349	0.116339
K01504	2.32e-05	2.87e-05	2.67e-05	1.25e-05	1.32e-05	1.87e-05	2.6e-05	2.52e-05	1.28e-05	1.36e-05	1.16e-05	1.16e-05	1.33e-05	1.53e-05	1.06e-05	1.8e-05	1.81e-05	1.1e-05	1.4e-05	1.69e-05	1.56e-05	1.16e-05	1.16e-05	1.23e-05	1.16e-05	8.91e-06	glucosamine-6-phosphate isomerase [EC:3.5.99.6]	0.0364627	0.122331
K01505	0.000135063	0.00022086	0.000209443	9.45e-05	6.81e-05	0.000219382	0.000155542	0.000205843	0.00012495	9.83e-05	6.93e-05	9.45e-05	0.000105909	0.000121189	0.000214713	0.000179372	0.000174065	9.42e-05	0.000201263	0.000169547	0.00018736	0.000133224	0.000134219	8.09e-05	7.3e-05	0.000101365	1-aminocyclopropane-1-carboxylate deaminase [EC:3.5.99.7]	0.0292811	0.0243242
K01506	9.5e-05	0.000142491	0.000109966	6.03e-05	3.87e-05	9.94e-05	0.000108539	0.00011442	6e-05	4.45e-05	4.39e-05	4.44e-05	6.13e-05	7.82e-05	7.08e-05	9.61e-05	8.76e-05	5.41e-05	0.000104516	0.000103183	0.00011044	6.64e-05	6.23e-05	6.39e-05	5.17e-05	6.91e-05	[EC:3.5.-.-]	0.0183363	0.0655658
K01507	0.000125059	0.000184082	0.000178169	0.000197198	0.000340046	0.000210325	0.000164816	0.000181676	0.000206319	0.000180692	0.000238519	0.000308096	0.000211448	0.0001093	0.000220231	0.000154989	0.000143833	0.000210165	0.000160838	0.000149102	0.000151834	0.000185644	0.000169889	0.000154108	0.00020468	0.000206285	inorganic pyrophosphatase [EC:3.6.1.1]	0.0415279	0.403246
K01510	1.06e-09	6.3e-08	7.07e-08	5.05e-08	1.04e-09	5.71e-08	0	2.22e-07	0	1.26e-07	2.49e-09	0	5.49e-08	0	3.64e-09	0	5.02e-07	0	1.66e-09	2.99e-08	2.57e-07	0	0	6.37e-09	0	1.67e-07	apyrase [EC:3.6.1.5]	0.585371	0.749254
K01512	2.12e-06	8.56e-07	3.7e-06	1.36e-05	2.16e-05	1.27e-05	9.65e-06	4.09e-06	8.7e-06	9.32e-06	1.43e-05	1.73e-05	1.3e-05	4.84e-06	9.01e-06	4.23e-06	3e-06	1.44e-05	1.05e-05	5e-06	5.47e-06	9.64e-06	1.05e-05	1.02e-05	1.53e-05	1.68e-05	acylphosphatase [EC:3.6.1.7]	0.0606662	0.023126
K01515	0.000173389	0.000230774	0.00021916	0.000187628	0.00031159	0.000223118	0.00022439	0.00022372	0.000198495	0.000188298	0.000225545	0.000275251	0.000197373	0.000157716	0.000160763	0.00019777	0.000203539	0.000219807	0.000193941	0.000203849	0.000201328	0.000197491	0.000184897	0.000187268	0.000224643	0.000202417	ADP-ribose pyrophosphatase [EC:3.6.1.13]	0.681736	0.728173
K01518	2.62e-08	4.09e-08	6.44e-08	5.83e-08	7.55e-09	2.74e-08	4.33e-08	1.11e-07	1.24e-08	8.13e-08	6.7e-08	2.96e-08	1.97e-08	0	8.66e-08	1.06e-08	1.98e-08	1.15e-09	1.3e-09	1.24e-08	1.19e-08	5.94e-09	1.95e-08	3.54e-09	8.13e-09	5.15e-08	bis(5'-nucleosidyl)-tetraphosphatase [EC:3.6.1.17]	0.599655	0.361093
K01520	0.000180235	0.000177346	0.000172503	0.000151797	0.000104544	0.00016536	0.000157464	0.000172143	0.000161028	0.000160556	0.000139067	0.00012271	0.000150301	0.000180449	0.000188419	0.000176551	0.000178092	0.000147749	0.00017158	0.000175042	0.000177674	0.000164091	0.000167682	0.000161276	0.000143206	0.000150619	dUTP pyrophosphatase [EC:3.6.1.23]	0.037419	0.0135711
K01521	5.53e-07	1.09e-07	9.56e-07	8.22e-07	2.34e-07	5.69e-06	1.69e-06	8.94e-07	3.05e-07	1.31e-06	9.81e-07	4.73e-07	8.28e-07	1.22e-06	2.96e-06	1.84e-06	4.15e-07	3.02e-07	1.32e-06	4.08e-07	3.41e-07	4.69e-07	1.12e-06	6.68e-07	2.75e-07	7.65e-07	CDP-diacylglycerol pyrophosphatase [EC:3.6.1.26]	0.99272	0.220432
K01523	6.93e-05	8.7e-05	7.8e-05	6.87e-05	7.32e-05	6.9e-05	7.84e-05	8.07e-05	5.3e-05	5.23e-05	6.26e-05	6.66e-05	7.32e-05	7.17e-05	5.49e-05	8.27e-05	8.12e-05	6.66e-05	6.71e-05	8.08e-05	7.7e-05	6.44e-05	6.21e-05	6.76e-05	7.03e-05	6.87e-05	phosphoribosyl-ATP pyrophosphohydrolase [EC:3.6.1.31]	0.133678	0.230422
K01524	0.000718249	0.000786745	0.000746525	0.000692677	0.000895753	0.000687911	0.000745416	0.000734141	0.000735712	0.000718633	0.000765032	0.000833776	0.000694647	0.000716557	0.000727407	0.000759342	0.000767172	0.000789328	0.000713536	0.00076997	0.000744756	0.000751376	0.00072175	0.000754049	0.000798472	0.000743681	exopolyphosphatase / guanosine-5'-triphosphate,3'-diphosphate pyrophosphatase [EC:3.6.1.11 3.6.1.40]	0.765322	0.829719
K01525	1.41e-05	1.01e-05	2.09e-05	5.18e-05	9.6e-06	5.61e-05	3.39e-05	2.83e-05	9.03e-06	1.05e-05	2.3e-05	1.71e-05	5.77e-05	2.36e-05	3.51e-05	2.05e-05	1.33e-05	7.81e-06	3.15e-05	1.52e-05	2.08e-05	9.57e-06	1.88e-05	1.09e-05	9.19e-06	3.48e-05	bis(5'-nucleosyl)-tetraphosphatase (symmetrical) [EC:3.6.1.41]	0.821004	0.203255
K01529	0.000280409	0.000230199	0.000244149	0.000275513	0.000190773	0.000177925	0.000224996	0.000231297	0.000221628	0.000245502	0.000235227	0.000193272	0.000267963	0.000331547	0.000256943	0.000319833	0.00031057	0.000280638	0.000253076	0.000300378	0.000282765	0.000283173	0.000292245	0.000317033	0.000292588	0.000330268	[EC:3.6.1.-]	0.715864	0.988524
K01531	3.82e-05	2.77e-05	4.63e-05	6.58e-05	5.91e-05	8.05e-05	3.77e-05	4.11e-05	3.26e-05	4.47e-05	4.99e-05	5.11e-05	6.63e-05	4.88e-05	9.43e-05	6.72e-05	3.24e-05	4.56e-05	4.69e-05	3.55e-05	3.27e-05	4.82e-05	6.55e-05	4.49e-05	4.76e-05	9.87e-05	Mg2+-importing ATPase [EC:3.6.3.2]	0.433235	0.891277
K01533	0.00185668	0.00258656	0.00248917	0.00176703	0.00186701	0.00229978	0.00224918	0.00238477	0.00165843	0.00151892	0.00154538	0.00180674	0.0018852	0.00185782	0.00225609	0.00238758	0.00234113	0.00184394	0.0023597	0.00232356	0.00236661	0.00193577	0.001937	0.00170657	0.0017552	0.00194646	Cu2+-exporting ATPase [EC:3.6.3.4]	0.0701017	0.0371495
K01534	0.000872712	0.00107147	0.00111731	0.000806364	0.000729715	0.00103048	0.000976907	0.00103092	0.000784034	0.000753667	0.000689814	0.000747387	0.000836687	0.000999782	0.00109858	0.00120314	0.00120526	0.000890809	0.00115265	0.00113935	0.00114711	0.000961975	0.00097456	0.000877312	0.000852032	0.000908318	Cd2+/Zn2+-exporting ATPase [EC:3.6.3.3 3.6.3.5]	0.0180541	0.0155448
K01535	2.61e-05	3.44e-05	3e-05	2.8e-05	3.15e-05	3.31e-05	2.93e-05	3.16e-05	2.4e-05	2.26e-05	2.59e-05	2.85e-05	3.63e-05	2.74e-05	3.36e-05	3.53e-05	2.76e-05	3.06e-05	3.2e-05	3.2e-05	3.13e-05	3.25e-05	3.26e-05	2.64e-05	2.96e-05	4.5e-05	H+-transporting ATPase [EC:3.6.3.6]	0.611016	0.593067
K01537	0.000177515	0.000224632	0.000218367	0.00020669	0.00030545	0.000258506	0.000229658	0.000220624	0.000198919	0.000209704	0.000216869	0.0002664	0.000233918	0.000231711	0.000422468	0.000291457	0.000275717	0.000305014	0.000287227	0.000288471	0.000257657	0.00030283	0.000315537	0.000241833	0.000296566	0.000321666	Ca2+-transporting ATPase [EC:3.6.3.8]	0.710551	0.825369
K01539	1.07e-06	1.03e-06	1.53e-06	6.29e-06	1.57e-05	4.28e-06	3e-06	2.71e-06	6.5e-06	6.54e-06	9.5e-06	1.25e-05	8.36e-06	1.76e-06	5.99e-06	2.18e-06	2.22e-06	1.12e-05	2.26e-06	2.76e-06	1.51e-06	7.3e-06	7.12e-06	6.96e-06	1.16e-05	1.22e-05	sodium/potassium-transporting ATPase subunit alpha [EC:3.6.3.9]	0.0171139	0.0515087
K01541	0	1.22e-08	0	0	7.88e-09	0	0	0	0	5.4e-09	0	0	0	0	6.02e-08	0	4.3e-08	0	3.77e-09	0	0	6.24e-09	7.56e-09	0	4.36e-09	0	H+/K+-exchanging ATPase [EC:3.6.3.10]	0.957987	0.441747
K01545	2.53e-08	3.73e-09	4.92e-08	1.92e-08	4.49e-08	2.44e-07	7.67e-08	9.71e-08	7.28e-08	3.98e-08	3.01e-08	1.96e-08	1.46e-08	1.61e-07	5.79e-06	2.53e-07	4.59e-08	2.92e-08	1.16e-07	4.13e-08	4.79e-08	1.13e-08	3.01e-08	2.39e-08	2.15e-08	2.2e-07	K+-transporting ATPase ATPase F chain	0.957987	0.0594608
K01546	5.94e-05	7.85e-05	6.85e-05	6.45e-05	6.67e-05	0.000124615	9.46e-05	7.69e-05	4.33e-05	5.66e-05	6.27e-05	6.28e-05	7.07e-05	9.84e-05	0.000211279	0.000111902	0.000116686	8.32e-05	0.000113525	0.00011494	9.69e-05	8.11e-05	9.46e-05	8.27e-05	8.45e-05	9.84e-05	K+-transporting ATPase ATPase A chain [EC:3.6.3.12]	0.252004	0.00961388
K01547	0.000109852	0.000141842	0.000128784	0.000103055	0.000106014	0.000183006	0.000156139	0.000135105	7.61e-05	9.41e-05	9.9e-05	9.89e-05	0.000111173	0.00016349	0.000289391	0.000188282	0.000197121	0.000137518	0.000179363	0.000190641	0.000165525	0.00013522	0.000151426	0.000139959	0.000139944	0.000151509	K+-transporting ATPase ATPase B chain [EC:3.6.3.12]	0.11825	0.00719489
K01548	1.86e-05	2.38e-05	2.2e-05	1.74e-05	1.35e-05	3.74e-05	2.7e-05	2.39e-05	1.09e-05	1.51e-05	1.55e-05	1.36e-05	1.89e-05	3.07e-05	5.49e-05	3.56e-05	3.5e-05	2.17e-05	3.41e-05	3.42e-05	3e-05	2.3e-05	2.72e-05	2.33e-05	2.18e-05	2.7e-05	K+-transporting ATPase ATPase C chain [EC:3.6.3.12]	0.0854084	0.00523274
K01551	3.57e-05	4.4e-05	4.53e-05	6.18e-05	0.000161636	4.91e-05	5.5e-05	4.66e-05	7.6e-05	7.43e-05	0.000100736	0.000131612	6.69e-05	5.85e-05	5.08e-05	7.21e-05	8.12e-05	0.000130606	5.99e-05	7.75e-05	6.61e-05	9.98e-05	8.58e-05	0.00010008	0.000136841	9.42e-05	arsenite-transporting ATPase [EC:3.6.3.16]	0.0181199	0.0217723
K01552	0.000163403	0.000174555	0.000209473	0.000268757	0.000206154	0.000222996	0.000201182	0.000201093	0.000134569	0.000148839	0.000191793	0.000191148	0.000284433	0.000229222	0.000252864	0.000272171	0.000228423	0.000218436	0.00023278	0.000229855	0.000223761	0.000210722	0.000231468	0.000215057	0.000226849	0.000321485	[EC:3.6.3.-]	0.844322	0.157567
K01554	2.84e-07	7.2e-08	4.85e-07	2.93e-06	1.16e-05	3.13e-06	1.86e-06	1.44e-06	4.43e-06	4.76e-06	6.57e-06	9.01e-06	2.97e-06	6.21e-07	2.79e-06	1.18e-06	1.14e-06	6.3e-06	1.09e-06	1.1e-06	5.86e-07	3.86e-06	3.03e-06	3.85e-06	6.67e-06	4.13e-06	[EC:3.6.-.-]	0.0180541	0.0871305
K01555	0.000301624	0.00045822	0.000429085	0.000191091	0.000156013	0.000393322	0.000341044	0.000408559	0.000241065	0.000204192	0.00015272	0.000189298	0.000211857	0.00026553	0.000332961	0.000370826	0.000369396	0.000209917	0.000372104	0.00035545	0.000373535	0.000268773	0.000260925	0.000197471	0.000182728	0.000196255	fumarylacetoacetase [EC:3.7.1.2]	0.0210884	0.046554
K01556	0.000348008	0.000518124	0.000480519	0.000220887	0.000178121	0.00043753	0.000393145	0.00045381	0.000267884	0.000233167	0.000178645	0.000213241	0.000243626	0.000325676	0.000409802	0.00044243	0.00044299	0.000255294	0.000432648	0.000428638	0.00044161	0.000317148	0.000312432	0.000246333	0.000225664	0.000237119	kynureninase [EC:3.7.1.3]	0.02204	0.0184401
K01560	0.00024849	0.000292674	0.000292611	0.000181927	0.000143169	0.000239159	0.000245384	0.000272904	0.000191376	0.000185392	0.000152791	0.00015194	0.000185388	0.000230924	0.000212177	0.00027421	0.000264431	0.000183132	0.000244644	0.000253596	0.000256028	0.000217173	0.000219764	0.000193438	0.000174617	0.000186162	2-haloacid dehalogenase [EC:3.8.1.2]	0.0235099	0.0378932
K01561	0.000137062	7.29e-05	7.66e-05	0.000135316	0.000107223	7.76e-05	9.3e-05	8.27e-05	0.000145454	0.000158142	0.000150355	0.000117794	0.000126838	0.000107507	7.11e-05	5.22e-05	5.45e-05	0.000108052	5.64e-05	5.8e-05	5.78e-05	0.00010188	0.000104708	0.000126274	0.000113636	0.000105659	haloacetate dehalogenase [EC:3.8.1.3]	0.0639091	0.0217723
K01563	0.000127056	0.000199906	0.000152825	9.35e-05	8.78e-05	0.000175818	0.000162318	0.000166837	9.7e-05	7.55e-05	8.18e-05	9.45e-05	9.26e-05	7.71e-05	9.66e-05	9.75e-05	9.15e-05	7.15e-05	0.000141328	0.000120781	0.000133536	8.39e-05	8.04e-05	7.26e-05	7.11e-05	9.45e-05	haloalkane dehalogenase [EC:3.8.1.5]	0.0245663	0.120075
K01564	7.89e-05	2.38e-05	3.6e-05	8.69e-05	4.77e-05	5.84e-05	4.52e-05	4.07e-05	8.09e-05	9.01e-05	8.64e-05	5.86e-05	7.7e-05	7.83e-05	6.64e-05	4.64e-05	3.73e-05	6.53e-05	4.06e-05	3.91e-05	3.88e-05	6.48e-05	7.16e-05	8.21e-05	6.92e-05	8.25e-05	[EC:3.8.1.-]	0.172112	0.122331
K01565	2.15e-06	5.27e-06	6.93e-06	2.14e-06	1.87e-06	8.24e-06	5.19e-06	7e-06	2.99e-06	2.61e-06	1.5e-06	2.3e-06	2.42e-06	2.33e-06	6.35e-06	7.92e-06	6.1e-06	3.45e-06	6.32e-06	6.44e-06	5.02e-06	3.46e-06	3.76e-06	1.82e-06	2e-06	3.05e-06	N-sulfoglucosamine sulfohydrolase [EC:3.10.1.1]	0.136944	0.0184401
K01567	6.3e-05	6.94e-05	7.32e-05	5.36e-05	3.6e-05	6.61e-05	6.44e-05	6.53e-05	3.2e-05	3.87e-05	3.99e-05	3.39e-05	5.19e-05	8.32e-05	7.58e-05	0.000100728	9.01e-05	5.94e-05	7.48e-05	8.7e-05	8.06e-05	6.23e-05	6.75e-05	6.94e-05	6.32e-05	7.68e-05	[EC:3.-.-.-]	0.0195644	0.0243242
K01569	6.72e-07	4.44e-07	7.65e-07	7.36e-06	1.58e-05	4.04e-06	2.43e-06	1.37e-06	6.41e-06	6.25e-06	1.02e-05	1.28e-05	7.09e-06	2.18e-06	5.28e-06	2.18e-06	1.86e-06	1.23e-05	2.54e-06	2.52e-06	1.42e-06	8.3e-06	7.12e-06	8.4e-06	1.31e-05	1.05e-05	oxalate decarboxylase [EC:4.1.1.2]	0.0252937	0.032062
K01571	0.000116421	0.000161498	0.000165793	0.000197259	7.95e-05	0.000183097	0.000165462	0.000185494	0.000108827	8.55e-05	0.000103145	0.0001136	0.000214183	0.000119649	0.000135477	0.000136729	0.000144158	8.63e-05	0.000196598	0.000151624	0.000180841	0.000112789	0.000116115	8.51e-05	8.37e-05	0.000146171	oxaloacetate decarboxylase, alpha subunit [EC:4.1.1.3]	0.172112	0.174326
K01572	1.9e-05	2.11e-05	3.23e-05	8.24e-05	1.08e-05	4.05e-05	5.26e-05	3.89e-05	1.32e-05	1.06e-05	2.83e-05	2.18e-05	8.76e-05	3.08e-05	3.31e-05	2.53e-05	2.46e-05	1.53e-05	6.45e-05	3.49e-05	4.67e-05	1.59e-05	2.25e-05	1.94e-05	1.63e-05	5.24e-05	oxaloacetate decarboxylase, beta subunit [EC:4.1.1.3]	0.50482	0.25157
K01573	2.65e-06	2.64e-06	3.4e-06	1.45e-05	2.91e-06	3.67e-06	3.95e-06	6.01e-06	2.63e-06	1.54e-06	7.04e-06	6.26e-06	1.68e-05	2.28e-06	2.66e-06	1.23e-06	1.65e-06	1.64e-06	1.73e-06	1.41e-06	2.54e-06	1.45e-06	9.82e-07	1.79e-06	2.57e-06	6.42e-06	oxaloacetate decarboxylase, gamma subunit [EC:4.1.1.3]	0.805239	0.863172
K01574	1.89e-06	1.07e-06	2.45e-06	4.81e-06	2.32e-06	6.6e-06	2.39e-06	2.57e-06	1.11e-06	1.7e-06	2.91e-06	1.92e-06	4.15e-06	3.22e-06	6.87e-06	3.65e-06	1.67e-06	1.75e-06	3e-06	1.36e-06	1.33e-06	2.23e-06	3.73e-06	2.72e-06	1.91e-06	5.62e-06	acetoacetate decarboxylase [EC:4.1.1.4]	0.92204	0.867993
K01575	2.31e-06	5.27e-06	2.17e-06	1.07e-05	3.16e-05	1.06e-05	1.08e-05	5.52e-06	1.26e-05	1.28e-05	1.85e-05	2.6e-05	1.1e-05	2.48e-06	3.27e-05	2.68e-06	7.76e-06	1.67e-05	7.37e-06	8.2e-06	3.62e-06	1.04e-05	9.73e-06	1.03e-05	1.76e-05	1.31e-05	acetolactate decarboxylase [EC:4.1.1.5]	0.0180541	0.29107
K01576	5.42e-06	4.94e-06	6.54e-06	1.08e-05	1.39e-05	1.67e-05	8.54e-06	7.44e-06	7.16e-06	8.11e-06	1.17e-05	1.2e-05	1.09e-05	1.1e-05	1.6e-05	1.32e-05	1.01e-05	1.4e-05	1.09e-05	9.92e-06	8.68e-06	1.2e-05	1.31e-05	1.3e-05	1.49e-05	1.5e-05	benzoylformate decarboxylase [EC:4.1.1.7]	0.101629	0.648377
K01577	9.95e-07	3.42e-07	1.03e-06	2.19e-06	5.54e-07	5.95e-06	1.74e-06	1.17e-06	7.73e-07	2.53e-06	2.04e-06	9.23e-07	2.2e-06	1.94e-06	3.65e-06	1.98e-06	3.98e-07	5.54e-07	1.66e-06	6.86e-07	6.28e-07	9.84e-07	2.86e-06	1.43e-06	7.04e-07	2.63e-06	oxalyl-CoA decarboxylase [EC:4.1.1.8]	0.805239	0.766324
K01578	0.000184472	9.42e-05	9.85e-05	0.000166967	0.000110672	9.35e-05	0.000120182	0.000107429	0.000182438	0.000198998	0.000180002	0.000129961	0.000157119	0.000155763	0.000130182	8.04e-05	8.51e-05	0.000135509	8.14e-05	8.89e-05	8.89e-05	0.000133605	0.000138748	0.000166493	0.000141927	0.000133124	malonyl-CoA decarboxylase [EC:4.1.1.9]	0.239949	0.0504773
K01579	5.95e-05	9.28e-05	8.97e-05	6.64e-05	3.48e-05	0.000103943	8.05e-05	8.87e-05	5.3e-05	4.45e-05	4.11e-05	4.59e-05	7.22e-05	5.58e-05	9.95e-05	7.68e-05	6.87e-05	4.35e-05	9.63e-05	7.33e-05	8.43e-05	5.73e-05	6.34e-05	3.92e-05	3.39e-05	6.29e-05	aspartate 1-decarboxylase [EC:4.1.1.11]	0.0210884	0.0361475
K01580	1.97e-05	2.18e-05	3.19e-05	4.3e-05	7.57e-05	2.97e-05	2.39e-05	2.76e-05	3.81e-05	3.8e-05	4.85e-05	6.18e-05	4.12e-05	2.4e-05	4.91e-05	3.69e-05	2.81e-05	5.56e-05	3.04e-05	2.73e-05	2.6e-05	4.72e-05	4.62e-05	4.05e-05	5.4e-05	5.99e-05	glutamate decarboxylase [EC:4.1.1.15]	0.0463031	0.166906
K01581	0.000133773	0.000150269	0.000150561	0.000116658	8.13e-05	9.72e-05	0.000131242	0.000139458	6.88e-05	8.08e-05	7.51e-05	6.52e-05	0.000114324	0.000188521	0.000141242	0.000218457	0.00021084	0.000134163	0.000158725	0.000199999	0.000184998	0.0001407	0.000143837	0.000153469	0.000141363	0.000152556	ornithine decarboxylase [EC:4.1.1.17]	0.0200245	0.091364
K01582	6.26e-06	3.91e-06	8.22e-06	9.07e-05	0.000344862	5.87e-05	4.59e-05	2.33e-05	0.000134136	0.00012889	0.000197368	0.000273336	9.51e-05	1.1e-05	2.82e-05	1.47e-05	2.49e-05	0.000159824	2e-05	2.61e-05	1.2e-05	0.000101173	7.87e-05	9.89e-05	0.000169929	0.000101623	lysine decarboxylase [EC:4.1.1.18]	0.0180133	0.0504773
K01583	7.26e-07	3.37e-07	6.31e-07	2.01e-05	7.94e-05	8.93e-06	9.04e-06	3.36e-06	3.09e-05	2.86e-05	4.53e-05	6.33e-05	2.15e-05	9.41e-07	2.8e-06	1.78e-06	5.22e-06	4e-05	2.89e-06	5.87e-06	2.35e-06	2.48e-05	1.8e-05	2.43e-05	4.27e-05	2.43e-05	arginine decarboxylase [EC:4.1.1.19]	0.0171139	0.0258566
K01584	0.00016849	0.000261798	0.000188572	0.000113192	8.88e-05	0.000249806	0.000186518	0.000220019	0.000128337	9.43e-05	9.86e-05	0.000105164	0.00012662	0.000107871	0.000163658	0.000138657	0.000102828	7.68e-05	0.000153013	0.000135131	0.000157774	0.000100225	0.000104055	8.95e-05	6.79e-05	0.00012191	arginine decarboxylase [EC:4.1.1.19]	0.0270661	0.0624266
K01585	0.000228316	0.000362191	0.000356698	0.000375698	0.00081321	0.000455411	0.000377217	0.000368201	0.000469507	0.000408	0.000516252	0.00070622	0.000396571	0.00022711	0.000367058	0.000320125	0.000329955	0.000492949	0.000411577	0.000345631	0.000358159	0.000426353	0.000380716	0.000343714	0.000479974	0.000406557	arginine decarboxylase [EC:4.1.1.19]	0.0183363	0.127375
K01586	0.000578839	0.000578372	0.000575282	0.000676053	0.000786154	0.000596244	0.000588208	0.00059721	0.000679114	0.000662742	0.000713718	0.000759665	0.00068423	0.000574468	0.000588286	0.000561419	0.000574632	0.000661255	0.00059499	0.000580228	0.000586976	0.00063501	0.000621762	0.000624835	0.000662634	0.00064659	diaminopimelate decarboxylase [EC:4.1.1.20]	0.0171139	0.0155448
K01588	0.000170361	0.000156091	0.000157026	0.000213109	0.000250893	0.000168567	0.000182064	0.000165904	0.000202901	0.000204563	0.000226034	0.000236143	0.00021252	0.000175269	0.00017941	0.000158578	0.000169296	0.000209115	0.000174612	0.000172887	0.00016952	0.000190647	0.000187311	0.00019852	0.000214923	0.000201211	5-(carboxyamino)imidazole ribonucleotide mutase [EC:5.4.99.18]	0.0270661	0.0184401
K01589	0.000457959	0.000497756	0.000501618	0.000531816	0.000600954	0.000519273	0.000490181	0.000509124	0.000537491	0.000512056	0.000539644	0.000592435	0.000542914	0.000442346	0.000494385	0.000461355	0.000474674	0.000507436	0.00050722	0.000475833	0.000489403	0.000503078	0.000489106	0.000466552	0.000500144	0.000495883	5-(carboxyamino)imidazole ribonucleotide synthase [EC:6.3.4.18]	0.0214166	0.266994
K01590	6.81e-05	0.000115344	7.41e-05	3.19e-05	3.25e-05	7.23e-05	7.04e-05	8.69e-05	4.51e-05	2.6e-05	3.15e-05	3.67e-05	3.29e-05	3.89e-05	4.78e-05	5.8e-05	4.15e-05	3.13e-05	6.23e-05	6.22e-05	7.01e-05	3.91e-05	3.23e-05	3.27e-05	2.65e-05	4.33e-05	histidine decarboxylase [EC:4.1.1.22]	0.040597	0.120075
K01591	0.000354306	0.00034325	0.000345389	0.000403821	0.000425085	0.000354073	0.000347662	0.00035163	0.000407513	0.000394963	0.000412596	0.000428325	0.000406794	0.000339084	0.000352012	0.000324674	0.00032774	0.000375434	0.000350476	0.000332682	0.000344577	0.000370448	0.000363562	0.000359348	0.00037077	0.000373024	orotidine-5'-phosphate decarboxylase [EC:4.1.1.23]	0.0181199	0.0139469
K01592	1.49e-05	2.3e-05	1.58e-05	8.49e-06	8.15e-06	1.37e-05	1.51e-05	1.73e-05	9.2e-06	6.45e-06	7.78e-06	8.57e-06	8.74e-06	7.78e-06	7.4e-06	9.88e-06	6.89e-06	5.5e-06	9.84e-06	1.09e-05	1.18e-05	6.7e-06	5.68e-06	6e-06	5.34e-06	8.98e-06	tyrosine decarboxylase [EC:4.1.1.25]	0.0270661	0.135047
K01593	6.91e-05	9.55e-05	9.17e-05	5.69e-05	5.11e-05	6.83e-05	7.89e-05	8.49e-05	5.24e-05	5.22e-05	4.66e-05	4.96e-05	6.11e-05	8.72e-05	8.17e-05	0.000110561	0.000114452	7.64e-05	9.42e-05	0.000106686	0.000101184	8.29e-05	8.09e-05	7.8e-05	7.34e-05	7.09e-05	aromatic-L-amino-acid decarboxylase [EC:4.1.1.28]	0.0180541	0.0217723
K01595	0.000644696	0.000443392	0.000553894	0.000924089	0.00135664	0.000721495	0.000632099	0.000592215	0.00108175	0.00107131	0.00115929	0.00127294	0.000906645	0.000604533	0.000580118	0.000468046	0.000521462	0.000957767	0.00062281	0.00052874	0.000549417	0.000853277	0.000821241	0.000826529	0.000963282	0.000827169	phosphoenolpyruvate carboxylase [EC:4.1.1.31]	0.0181199	0.0135711
K01596	9.96e-06	3.4e-06	2.25e-05	5.66e-05	7.6e-06	6.16e-05	5.51e-05	1.8e-05	6.25e-06	1.56e-05	2.09e-05	1.04e-05	5.04e-05	2.44e-05	2.65e-05	1.69e-05	5.35e-06	5.97e-06	7.44e-05	2.24e-05	3.74e-05	7.95e-06	2.76e-05	1.08e-05	6.58e-06	5.48e-05	phosphoenolpyruvate carboxykinase (GTP) [EC:4.1.1.32]	0.755187	0.891277
K01597	0.000153655	0.000262107	0.000238781	0.000106929	7.4e-05	0.000235019	0.000177971	0.000231269	0.000144048	0.000111263	7.69e-05	0.000106204	0.000121034	0.000132443	0.000251126	0.000200095	0.000200474	0.000109167	0.000230226	0.000196448	0.000216538	0.000153935	0.000151766	9.26e-05	8.27e-05	0.000112133	diphosphomevalonate decarboxylase [EC:4.1.1.33]	0.0210884	0.0258566
K01598	4.37e-06	4.93e-06	6.89e-06	2.02e-05	6.07e-06	9.2e-06	1.02e-05	9.1e-06	5.6e-06	4.17e-06	7.32e-06	6.84e-06	2.06e-05	5.37e-06	1.6e-05	3.98e-06	4.31e-06	3.62e-06	1.11e-05	5.18e-06	8.18e-06	4.19e-06	5.47e-06	3.72e-06	3.58e-06	1.12e-05	phosphopantothenoylcysteine decarboxylase [EC:4.1.1.36]	0.958235	0.428691
K01599	0.000419503	0.000437543	0.000448296	0.000532174	0.000537891	0.000482732	0.000484597	0.000456982	0.000483812	0.000465661	0.000498574	0.000529818	0.000534129	0.000426123	0.00046856	0.000416739	0.000427091	0.000468962	0.000517966	0.000447779	0.000473916	0.00045638	0.000455843	0.000439781	0.00046375	0.000490802	uroporphyrinogen decarboxylase [EC:4.1.1.37]	0.0873022	0.333288
K01601	0.000102908	0.000122939	0.000117988	0.000237849	0.000548026	0.000127222	0.000160413	0.000133019	0.000247314	0.000234072	0.000353222	0.000456821	0.00025826	0.000148625	0.000102383	0.000169388	0.000197251	0.000339449	0.000143477	0.000195147	0.000166035	0.000253606	0.000211996	0.000263299	0.000363007	0.000262602	ribulose-bisphosphate carboxylase large chain [EC:4.1.1.39]	0.0183363	0.0213017
K01602	1.54e-05	1.8e-05	1.7e-05	3.33e-05	0.0001	1.94e-05	2.51e-05	1.89e-05	4.35e-05	4.17e-05	6.02e-05	8.04e-05	3.52e-05	2.53e-05	1.74e-05	2.94e-05	3.47e-05	6.34e-05	2.46e-05	3.43e-05	2.82e-05	4.67e-05	3.86e-05	4.78e-05	6.72e-05	4.44e-05	ribulose-bisphosphate carboxylase small chain [EC:4.1.1.39]	0.0181199	0.023006
K01607	0.000209901	0.000197115	0.000198356	0.000161435	0.000123525	0.000171236	0.000193412	0.000187647	0.000156947	0.000172012	0.000155197	0.000127123	0.000158037	0.000219723	0.000164272	0.000216705	0.000214176	0.000174453	0.000176347	0.000204092	0.000194187	0.000178533	0.000183598	0.000201244	0.000181296	0.000169741	4-carboxymuconolactone decarboxylase [EC:4.1.1.44]	0.0183775	0.343081
K01608	7.02e-05	1.5e-05	2.57e-05	7.54e-05	4.47e-05	5.58e-05	3.9e-05	3.43e-05	7.84e-05	8.85e-05	8.33e-05	5.58e-05	6.72e-05	6.77e-05	6.2e-05	3.2e-05	2.27e-05	5.68e-05	3.3e-05	2.55e-05	2.75e-05	5.56e-05	6.37e-05	7.26e-05	6e-05	6.64e-05	tartronate-semialdehyde synthase [EC:4.1.1.47]	0.0909898	0.133549
K01609	0.000327424	0.000338545	0.000343655	0.000396831	0.000491773	0.000350256	0.000348077	0.000351639	0.000399106	0.000384731	0.000425572	0.00046504	0.000405483	0.000325283	0.000278265	0.000332155	0.000335604	0.000396197	0.000343417	0.000337708	0.000342845	0.000375695	0.000357977	0.000363337	0.000396974	0.000371007	indole-3-glycerol phosphate synthase [EC:4.1.1.48]	0.0180541	0.00995667
K01610	0.000474678	0.00071934	0.000674772	0.000334912	0.000248782	0.000572086	0.000536994	0.00063818	0.000357152	0.000310712	0.000239569	0.000284187	0.000360942	0.000470461	0.000581832	0.000643785	0.000634136	0.000372916	0.000629623	0.000617398	0.000638294	0.000449764	0.00044752	0.000364008	0.000331438	0.000377503	phosphoenolpyruvate carboxykinase (ATP) [EC:4.1.1.49]	0.0183775	0.0184401
K01611	1.59e-05	2.02e-05	2.17e-05	3.96e-05	0.000120288	5.07e-05	3.76e-05	2.61e-05	5.1e-05	4.97e-05	7.19e-05	9.58e-05	4.04e-05	2.68e-05	5.53e-05	3.48e-05	3.88e-05	7.12e-05	3.24e-05	3.68e-05	2.8e-05	5.18e-05	4.47e-05	5.05e-05	7.46e-05	4.85e-05	S-adenosylmethionine decarboxylase [EC:4.1.1.50]	0.0183775	0.241023
K01612	2.01e-08	5.79e-09	1.95e-08	3.13e-09	4.55e-09	1.2e-07	3.25e-08	1.74e-08	8.73e-09	1.53e-08	1.82e-08	9.95e-09	4.92e-09	6.5e-08	1.26e-07	6.92e-08	1.12e-08	1.04e-08	6.38e-08	1.77e-08	1.93e-08	1.91e-08	6.72e-08	2.13e-08	9.23e-09	2.01e-08	4-hydroxybenzoate decarboxylase [EC:4.1.1.61]	0.627937	0.333288
K01613	0.000362183	0.000242395	0.000256389	0.000397191	0.000216687	0.000286437	0.000276609	0.000277365	0.000371136	0.000379684	0.000355498	0.000277132	0.000383411	0.000357471	0.000341576	0.000256389	0.00025197	0.000298496	0.000299489	0.000266784	0.000286291	0.000317169	0.000333452	0.000344696	0.000296285	0.000342598	phosphatidylserine decarboxylase [EC:4.1.1.65]	0.605138	0.19717
K01615	1.51e-05	2.44e-05	2.74e-05	9.19e-06	9.91e-06	2.82e-05	1.64e-05	2.72e-05	1.99e-05	1.6e-05	7.97e-06	1.6e-05	1.01e-05	1.22e-05	1.69e-05	1.73e-05	2.61e-05	9.7e-06	2.51e-05	2.07e-05	2.49e-05	1.64e-05	1.61e-05	6.94e-06	8.79e-06	6.34e-06	glutaconyl-CoA decarboxylase [EC:4.1.1.70]	0.132097	0.0319227
K01616	0.000161252	0.000100529	0.000107248	0.000155935	9.49e-05	9.38e-05	0.000123335	0.000108877	0.000148066	0.000166088	0.000153424	0.000111761	0.000145147	0.000155716	9.47e-05	0.000108254	0.000110989	0.000131021	0.000109298	0.000113966	0.000113906	0.000130805	0.000133816	0.000155959	0.000136601	0.000138894	2-oxoglutarate decarboxylase [EC:4.1.1.71]	0.692633	0.0213017
K01617	4.97e-06	4.34e-06	5.84e-06	4.63e-06	2.86e-06	1.51e-05	6.99e-06	6.17e-06	2.57e-06	3.75e-06	4.39e-06	3.03e-06	4.43e-06	9.69e-06	1.4e-05	1.13e-05	8.41e-06	5.31e-06	8.91e-06	8.08e-06	7.54e-06	5.95e-06	7.96e-06	6.63e-06	5.61e-06	6.93e-06	4-oxalocrotonate decarboxylase [EC:4.1.1.77]	0.142077	0.00775544
K01618	0.000134941	0.000101804	0.000110936	0.000188677	0.000342089	0.000117507	0.000134317	0.00011519	0.000225617	0.000223287	0.000267419	0.000302627	0.000189771	0.000144332	0.000115971	0.000130987	0.000139875	0.000241571	0.000119759	0.000136977	0.000127124	0.000201965	0.000183641	0.000209621	0.000247824	0.000189214	[EC:4.1.1.-]	0.0180541	0.0184401
K01619	0.0001516	0.000209983	0.000197034	0.000168388	0.000286868	0.000171985	0.000209702	0.000188599	0.000173495	0.000174727	0.000198481	0.000245717	0.000176613	0.000180365	0.000206399	0.000216765	0.000238574	0.000230609	0.000213298	0.000228533	0.000210059	0.000205265	0.00019293	0.000201663	0.000234493	0.000189793	deoxyribose-phosphate aldolase [EC:4.1.2.4]	0.74488	0.408687
K01620	0.000506593	0.000489583	0.00048182	0.000427405	0.00030317	0.00044226	0.00044202	0.00047475	0.000463018	0.00046449	0.000401695	0.000353507	0.000421594	0.000492367	0.000484072	0.000476737	0.000483639	0.000416622	0.00046201	0.000470744	0.000476227	0.000457764	0.000461491	0.000453291	0.000403862	0.000408385	threonine aldolase [EC:4.1.2.5]	0.0531258	0.0130807
K01621	3.86e-05	3.52e-05	5.52e-05	0.000107202	0.000189006	5.16e-05	4.18e-05	4.14e-05	8.15e-05	8.99e-05	0.00012805	0.000156663	0.000104913	3.87e-05	7.91e-05	5.87e-05	3.93e-05	0.000124365	3.66e-05	3.93e-05	3.39e-05	8.88e-05	9.16e-05	9.09e-05	0.000131471	0.00014578	phosphoketolase [EC:4.1.2.9]	0.0452279	0.0810865
K01622	4.88e-07	2.23e-07	6.25e-09	1.79e-06	1.84e-07	1.07e-07	4.81e-07	1.79e-07	1.2e-07	3.29e-07	4.58e-07	2.72e-07	1.26e-06	6.39e-07	3.44e-06	1.46e-07	0	1.87e-07	2.06e-07	2.04e-07	1.66e-07	1.35e-07	5.47e-07	2.11e-07	1.66e-07	1.96e-06	fructose 1,6-bisphosphate aldolase/phosphatase [EC:4.1.2.13 3.1.3.11]	0.875507	0.754028
K01623	9.47e-05	0.000111918	0.000111003	0.000111707	0.000222977	0.00010342	0.000119058	0.00010758	0.000114041	0.000113003	0.00014485	0.000178871	0.000113115	9.06e-05	7.1e-05	0.000109516	0.000113635	0.000137153	8.43e-05	0.000108723	9.47e-05	0.000113062	0.000100219	0.000117032	0.000145311	0.000111987	fructose-bisphosphate aldolase, class I [EC:4.1.2.13]	0.0783274	0.127375
K01624	0.000469773	0.000351754	0.000390556	0.000580684	0.00055769	0.0004135	0.000413166	0.000404053	0.000582832	0.000597857	0.000602014	0.000581891	0.000579733	0.000474776	0.000467756	0.000384197	0.000404994	0.000536041	0.000434696	0.000402194	0.000411387	0.000516987	0.000521675	0.000526853	0.000534771	0.000520939	fructose-bisphosphate aldolase, class II [EC:4.1.2.13]	0.0235099	0.0115666
K01625	0.000299944	0.000258648	0.000272551	0.000319795	0.000327562	0.000269189	0.00028862	0.000263202	0.000326916	0.000325975	0.000332364	0.000320959	0.000309727	0.000297643	0.000251797	0.000277411	0.000259847	0.000317509	0.000292642	0.000276487	0.00028375	0.000308603	0.000306632	0.000318574	0.000312625	0.000313016	2-dehydro-3-deoxyphosphogluconate aldolase / 4-hydroxy-2-oxoglutarate aldolase [EC:4.1.2.14 4.1.3.16]	0.0186499	0.00521135
K01626	0.000408374	0.000279815	0.00032026	0.000523241	0.000500097	0.000368413	0.000405566	0.000339105	0.000438947	0.000469446	0.000517092	0.000478861	0.000503774	0.000434113	0.000320164	0.000346784	0.000345448	0.000455172	0.000369462	0.000356995	0.000354552	0.000410944	0.000418591	0.000472635	0.000481833	0.000479895	3-deoxy-7-phosphoheptulonate synthase [EC:2.5.1.54]	0.055932	0.0135711
K01627	0.000331517	0.000343903	0.000342868	0.000335073	0.000254162	0.000324249	0.000316409	0.000342683	0.000308038	0.000295975	0.000288906	0.000276265	0.000339512	0.000323285	0.000298089	0.000328324	0.000316922	0.00030046	0.000329821	0.000319424	0.000333919	0.000315628	0.000313791	0.000303955	0.000293161	0.0003178	2-dehydro-3-deoxyphosphooctonate aldolase (KDO 8-P synthase) [EC:2.5.1.55]	0.0285115	0.374855
K01628	0.000108829	9.89e-05	9.83e-05	9.27e-05	8.37e-05	8.38e-05	0.00010048	9.6e-05	8.67e-05	9.52e-05	9.17e-05	8.08e-05	9.17e-05	0.000110883	7.86e-05	0.000106367	0.000106878	9.76e-05	8.59e-05	0.000103327	9.55e-05	9.52e-05	9.64e-05	0.000108425	0.000102701	9.78e-05	L-fuculose-phosphate aldolase [EC:4.1.2.17]	0.0571707	0.983687
K01629	5.22e-09	1.02e-08	1.55e-08	3.64e-08	1.32e-08	1.89e-08	2.15e-08	7.56e-08	1e-08	8.64e-07	2.18e-08	1.86e-08	8.21e-09	5.12e-08	4.02e-07	1.98e-08	5.01e-08	2.14e-08	4.05e-08	9.47e-09	1.13e-08	4.35e-08	4.66e-08	2.94e-08	3.03e-08	4.39e-08	rhamnulose-1-phosphate aldolase [EC:4.1.2.19]	0.976878	0.692749
K01630	1.97e-05	2.49e-05	2.38e-05	1.6e-05	2.52e-05	2.55e-05	2.48e-05	2.24e-05	1.63e-05	1.8e-05	1.91e-05	2.13e-05	1.76e-05	1.94e-05	1.71e-05	2.31e-05	2.22e-05	1.83e-05	1.84e-05	2.09e-05	1.87e-05	1.75e-05	1.76e-05	1.86e-05	1.96e-05	1.7e-05	2-dehydro-3-deoxyglucarate aldolase [EC:4.1.2.20]	0.571397	0.159885
K01631	0.000289592	0.000195312	0.000195188	0.000245464	0.000169008	0.000158109	0.000218547	0.000198556	0.000258846	0.00028148	0.000253109	0.000191324	0.000230129	0.000264936	0.000153287	0.000185551	0.000197682	0.000224706	0.000173359	0.000197293	0.000191577	0.000223999	0.000226265	0.000268453	0.00023561	0.000211041	2-dehydro-3-deoxyphosphogalactonate aldolase [EC:4.1.2.21]	0.755187	0.0431938
K01632	3.46e-05	3.09e-05	4.91e-05	9.39e-05	0.000149975	4.33e-05	3.46e-05	3.54e-05	6.49e-05	7.27e-05	0.00010479	0.000125049	9.11e-05	3.34e-05	6.47e-05	5.21e-05	3.26e-05	0.000100863	3.04e-05	3.3e-05	2.84e-05	7.28e-05	7.56e-05	7.55e-05	0.000106849	0.000127394	fructose-6-phosphate phosphoketolase [EC:4.1.2.22]	0.0381699	0.0690501
K01633	0.000180485	0.000211099	0.000197525	0.000181895	0.000217746	0.000187351	0.000204293	0.000199699	0.000177981	0.000173951	0.000187887	0.000204011	0.00018608	0.000178088	0.000173084	0.000190881	0.000198675	0.000189768	0.000189999	0.000199795	0.000194425	0.000182628	0.000176217	0.000183497	0.000193464	0.000178745	dihydroneopterin aldolase [EC:4.1.2.25]	0.782196	0.556625
K01635	4.33e-07	3.15e-07	3.46e-07	1.38e-06	2.31e-07	2.29e-07	1.38e-07	2.6e-07	1.12e-07	2.91e-07	6.02e-07	2.55e-07	1.03e-06	3.18e-07	1.54e-06	3.08e-07	4.33e-07	1.73e-07	2.47e-07	1.79e-07	1.33e-07	3.39e-07	4.19e-07	3.92e-07	3.45e-07	9.86e-07	tagatose 1,6-diphosphate aldolase [EC:4.1.2.40]	0.889107	0.940497
K01636	3.57e-05	3.4e-05	4.56e-05	8.91e-05	0.000154977	4e-05	3.84e-05	3.6e-05	6.66e-05	7.18e-05	0.000105037	0.000127903	8.67e-05	3.13e-05	5.43e-05	4.53e-05	3.19e-05	9.9e-05	2.72e-05	3.34e-05	2.55e-05	7.08e-05	6.95e-05	7.54e-05	0.000107098	0.000119194	[EC:4.1.2.-]	0.0452279	0.0671996
K01637	0.000333298	0.000204911	0.000258264	0.000370626	0.000208037	0.000288829	0.000221472	0.000265329	0.000381659	0.000388228	0.000344264	0.000282231	0.000354244	0.00031444	0.000270639	0.000225889	0.000236233	0.000270268	0.000253169	0.000219973	0.000245695	0.000301223	0.000314692	0.000307865	0.000268576	0.000298488	isocitrate lyase [EC:4.1.3.1]	0.312407	0.104397
K01638	0.000702521	0.000538611	0.000579357	0.000626621	0.000434529	0.000527876	0.000544481	0.000576118	0.000664611	0.000698151	0.000607292	0.00049743	0.000596794	0.000707892	0.000516022	0.000594648	0.000620747	0.000590266	0.000554775	0.000588807	0.000588885	0.000625117	0.000634303	0.000675862	0.000601701	0.000571742	malate synthase [EC:2.3.3.9]	0.963021	0.418986
K01639	3.92e-06	8.22e-06	7.74e-06	3.85e-06	2.32e-06	1.07e-05	6.38e-06	9.46e-06	3.68e-06	5.32e-06	2.65e-06	3.29e-06	4.64e-06	2.49e-06	1.49e-05	6.41e-06	5.03e-06	3.4e-06	7.54e-06	6.63e-06	4.45e-06	3.79e-06	4.85e-06	2.77e-06	2.5e-06	6.74e-06	N-acetylneuraminate lyase [EC:4.1.3.3]	0.0668754	0.187863
K01640	0.000235684	0.000336915	0.000322504	0.000154715	0.000120985	0.000322706	0.000270467	0.000301483	0.000165804	0.000150249	0.000124978	0.000136022	0.000166832	0.000227664	0.000277023	0.000307353	0.00028307	0.000169215	0.000281215	0.000276072	0.000279525	0.000205048	0.000208485	0.000170147	0.000153855	0.000177545	hydroxymethylglutaryl-CoA lyase [EC:4.1.3.4]	0.020561	0.0135711
K01641	8.81e-06	1.54e-05	2.14e-05	8.8e-06	6.59e-06	1.19e-05	8.74e-06	1.13e-05	6.7e-06	5.43e-06	4.78e-06	6.02e-06	1.01e-05	9.35e-06	1.4e-05	2.02e-05	1.33e-05	9.82e-06	1.38e-05	1.24e-05	1.24e-05	9.26e-06	7.53e-06	5.92e-06	7.31e-06	1.13e-05	hydroxymethylglutaryl-CoA synthase [EC:2.3.3.10]	0.0270661	0.0172019
K01643	1.42e-05	1.74e-05	1.62e-05	7.57e-06	7.56e-06	1.14e-05	1.52e-05	1.5e-05	7.57e-06	9.84e-06	7.03e-06	6.71e-06	8e-06	1.35e-05	1.01e-05	1.55e-05	1.61e-05	1.01e-05	1.23e-05	1.55e-05	1.43e-05	1.04e-05	1.01e-05	1.12e-05	1.05e-05	8.12e-06	citrate lyase subunit alpha / citrate CoA-transferase [EC:4.1.3.6 2.8.3.10]	0.0206857	0.0851777
K01644	0.000311315	0.000306322	0.000304011	0.000238876	0.000174155	0.000243495	0.000304657	0.000286387	0.000205904	0.000229446	0.000207706	0.0001729	0.000234433	0.000296111	0.000202546	0.000295742	0.000288978	0.000222435	0.000243556	0.000281527	0.000266868	0.000229062	0.000239045	0.000259301	0.000233282	0.000236199	citrate lyase subunit beta / citryl-CoA lyase [EC:4.1.3.6 4.1.3.34]	0.0192648	0.247973
K01646	5.71e-08	1.85e-08	9.32e-08	3.28e-08	3.09e-08	5.7e-07	1.68e-07	1.24e-07	3.19e-08	4.04e-07	7.77e-08	4.99e-08	2.48e-08	1.2e-07	6.07e-07	1.51e-07	5.21e-08	3.52e-08	1.44e-07	4.17e-08	4.42e-08	5.91e-08	1.15e-07	7.39e-08	5.09e-08	1.27e-07	citrate lyase subunit gamma [EC:4.1.3.6]	0.867258	0.30713
K01647	0.000604727	0.000605688	0.000611197	0.000679301	0.000694725	0.000651988	0.000617401	0.000623274	0.000656744	0.000647691	0.000676105	0.000693047	0.000685362	0.000612265	0.00069553	0.000604802	0.000609552	0.000639727	0.000636272	0.000612155	0.000620415	0.000634645	0.000635047	0.000623146	0.000637367	0.000656827	citrate synthase [EC:2.3.3.1]	0.0364627	0.237277
K01649	0.00103997	0.000815896	0.000861359	0.00118686	0.00115296	0.000850219	0.000968666	0.000886068	0.0011332	0.0011636	0.00120003	0.00113691	0.00115406	0.0010281	0.000758297	0.00084788	0.000868757	0.00109106	0.000914557	0.000901129	0.000909088	0.00103431	0.00103193	0.00112014	0.00112437	0.00110114	2-isopropylmalate synthase [EC:2.3.3.13]	0.0452279	0.00545091
K01652	0.00226756	0.00141943	0.00155085	0.00233635	0.00195089	0.0015517	0.00172336	0.0016107	0.00243183	0.00257761	0.00248286	0.00209987	0.00222358	0.0021144	0.00150328	0.00147346	0.00152689	0.00209349	0.00148872	0.001526	0.00152806	0.00203247	0.00205088	0.00230269	0.00215982	0.00203406	acetolactate synthase I/II/III large subunit [EC:2.2.1.6]	0.0701017	0.0217723
K01653	0.000196694	0.000190049	0.000214005	0.000238849	0.000262124	0.000195227	0.000200529	0.000203672	0.000232068	0.000230015	0.000239093	0.000255453	0.000242493	0.000209869	0.000172587	0.000214418	0.000219414	0.00023698	0.000216938	0.000210998	0.000215983	0.000229914	0.000223615	0.000219738	0.000236753	0.00022572	acetolactate synthase I/III small subunit [EC:2.2.1.6]	0.0324555	0.0172019
K01654	0.000208487	0.000233702	0.000238985	0.00024407	0.000371203	0.000249294	0.000232406	0.00023649	0.000301093	0.000289799	0.000295608	0.000351828	0.000257408	0.000195143	0.000328236	0.000201601	0.000241056	0.000285076	0.000230328	0.000217436	0.000215125	0.000265875	0.000255804	0.000235519	0.000274644	0.000226179	N-acetylneuraminate synthase [EC:2.5.1.56]	0.0195644	0.507959
K01655	3e-08	6.29e-09	6.28e-09	2.86e-07	1.55e-08	3.67e-08	5.7e-09	1.42e-08	1.02e-08	3.11e-08	1.18e-07	6.75e-09	2.03e-07	3.04e-08	1.76e-07	9.22e-09	0	3.14e-08	2.87e-08	1.35e-08	2.79e-08	8.53e-09	4.78e-08	1e-07	7.13e-09	7.98e-07	homocitrate synthase [EC:2.3.3.14]	0.224733	0.299052
K01657	0.000789442	0.000757157	0.000773946	0.000985349	0.00107135	0.000846288	0.000823022	0.000813398	0.000957067	0.000926179	0.00101744	0.00106041	0.00100364	0.000764984	0.000655067	0.000722561	0.000729833	0.000901926	0.000812153	0.000755108	0.000791869	0.000863761	0.000833362	0.000846015	0.000901019	0.000875876	anthranilate synthase component I [EC:4.1.3.27]	0.0183363	0.00523274
K01658	0.000362658	0.000292816	0.000266757	0.000374058	0.00033127	0.00029669	0.000301914	0.000302328	0.000396309	0.000392554	0.000394478	0.000358602	0.000364211	0.000327643	0.000291163	0.000244796	0.000252357	0.00033287	0.000280172	0.000275423	0.000284586	0.000328948	0.000323658	0.00035265	0.000337824	0.000332781	anthranilate synthase component II [EC:4.1.3.27]	0.0440073	0.0108391
K01659	2.52e-05	2.43e-05	2.99e-05	3e-05	3.31e-05	6.35e-05	3.66e-05	3.55e-05	1.85e-05	2.49e-05	2.7e-05	2.35e-05	3.1e-05	4.54e-05	5.7e-05	5.01e-05	4.34e-05	3.27e-05	3.99e-05	4.04e-05	3.72e-05	3.25e-05	4.04e-05	3.43e-05	3.4e-05	3.64e-05	2-methylcitrate synthase [EC:2.3.3.5]	0.942692	0.00928956
K01661	0.000194817	0.000294077	0.000283998	0.000223643	0.000351721	0.000296604	0.000270364	0.000278304	0.000255497	0.000227306	0.00024881	0.00032494	0.000236924	0.000183911	0.000272022	0.000248733	0.000255649	0.000259355	0.000293522	0.000260034	0.000268595	0.000253052	0.000238701	0.000203045	0.000245562	0.000233356	naphthoate synthase [EC:4.1.3.36]	0.99272	0.244515
K01662	0.000956507	0.00095956	0.000958639	0.00101588	0.00108017	0.00089862	0.000966969	0.000956208	0.000999037	0.000993049	0.00102705	0.00105517	0.00102885	0.000919153	0.000851044	0.000903018	0.000931568	0.000979616	0.000908243	0.000921993	0.00092136	0.00095306	0.00093408	0.000955036	0.000981238	0.000932818	1-deoxy-D-xylulose-5-phosphate synthase [EC:2.2.1.7]	0.0717763	0.0135912
K01663	6.42e-08	3.37e-08	6.58e-08	1.25e-07	4.11e-08	1.81e-07	6.3e-08	1.3e-07	2.31e-08	3.93e-08	7.26e-08	4.55e-08	8.92e-08	1.47e-07	1.54e-06	5.2e-08	1.95e-08	1.93e-08	7.27e-08	8.69e-08	1e-07	2.97e-08	1.44e-08	7.16e-08	4.07e-08	3.08e-07	glutamine amidotransferase / cyclase [EC:2.4.2.- 4.1.3.-]	0.892746	0.403246
K01664	0.000178832	0.000138269	0.000112443	0.000209856	0.00020868	0.000134571	0.000151358	0.000143951	0.000205384	0.000199329	0.000225854	0.00021166	0.000203168	0.000154135	0.000115201	9.89e-05	9.78e-05	0.000174011	0.000122535	0.000124346	0.000130513	0.000158445	0.000151671	0.000181839	0.000183351	0.000186321	para-aminobenzoate synthetase component II [EC:2.6.1.85]	0.0452279	0.00775544
K01665	0.000339894	0.000450495	0.000459383	0.000447496	0.000617907	0.000467292	0.000434344	0.000451688	0.000449388	0.000408871	0.000461139	0.00056913	0.000465398	0.0003534	0.000415311	0.000440916	0.000439103	0.000466846	0.000482431	0.000440294	0.000456475	0.00045058	0.000427927	0.000385312	0.000450357	0.000444272	para-aminobenzoate synthetase component I [EC:2.6.1.85]	0.273369	0.572304
K01666	7.07e-06	5.81e-06	8.82e-06	9.44e-06	1.59e-05	2.45e-05	1.14e-05	1.06e-05	7.09e-06	9.2e-06	1.11e-05	1.13e-05	1.05e-05	1.29e-05	2.16e-05	1.46e-05	9.96e-06	1.22e-05	1.17e-05	9.45e-06	8.58e-06	1.03e-05	1.3e-05	1.13e-05	1.3e-05	1.29e-05	4-hydroxy 2-oxovalerate aldolase [EC:4.1.3.39]	0.298763	0.650556
K01667	2.28e-05	3.09e-05	2.77e-05	1.33e-05	1.22e-05	2.22e-05	2.56e-05	2.74e-05	1.33e-05	1.43e-05	1.23e-05	1.16e-05	1.43e-05	4.24e-05	2.55e-05	4.81e-05	5.11e-05	3.17e-05	4.07e-05	5.02e-05	4.58e-05	3.33e-05	3.18e-05	3.53e-05	3.34e-05	2.84e-05	tryptophanase [EC:4.1.99.1]	0.0256055	0.17125
K01668	4.4e-06	7.43e-06	6.19e-06	2.88e-06	2.39e-06	5.59e-06	5.42e-06	6.92e-06	3.02e-06	2.75e-06	2.41e-06	2.59e-06	3.19e-06	7.98e-06	5.24e-06	8.98e-06	1e-05	6.02e-06	8.92e-06	1.02e-05	9.13e-06	6.79e-06	6e-06	6.66e-06	6.61e-06	6.71e-06	tyrosine phenol-lyase [EC:4.1.99.2]	0.0227788	0.226707
K01669	0.0010051	0.000938375	0.00097992	0.00111332	0.00132199	0.00095481	0.000962705	0.000966978	0.00125924	0.00123474	0.0012299	0.00129514	0.00111513	0.000963639	0.000875978	0.000904284	0.000945273	0.00115333	0.000986381	0.00092661	0.00096655	0.00112844	0.0010961	0.00107231	0.00112191	0.00102199	deoxyribodipyrimidine photo-lyase [EC:4.1.99.3]	0.0231784	0.00563271
K01671	1.29e-07	1.99e-07	2.45e-07	1.36e-07	3.61e-08	1.52e-07	2e-07	2.25e-07	3.34e-08	7.25e-07	8.82e-08	8.53e-08	9.5e-08	3.57e-08	1.15e-07	3.29e-08	1.49e-08	2.53e-08	3.3e-08	1.45e-08	1.07e-08	2.25e-08	2.88e-08	3.29e-08	2.35e-08	4.98e-08	[EC:4.1.-.-]	0.0951653	0.930124
K01673	0.000488578	0.000617813	0.000573989	0.000425016	0.000312112	0.00059935	0.000500232	0.000574764	0.000444203	0.000395954	0.000358049	0.000372539	0.000440883	0.000445686	0.000561693	0.000525095	0.000481789	0.000386451	0.000561993	0.000507071	0.00054096	0.000456432	0.000455636	0.000374057	0.000351598	0.000439505	carbonic anhydrase [EC:4.2.1.1]	0.0245663	0.0311764
K01674	8.96e-06	1.01e-05	1.57e-05	1.3e-05	6.12e-06	1.39e-05	9.53e-06	1.1e-05	8.35e-06	8.89e-06	7.31e-06	6.96e-06	1.6e-05	1.15e-05	1.69e-05	1.66e-05	1.24e-05	9.66e-06	1.2e-05	1.03e-05	1.17e-05	1.11e-05	1.48e-05	8.42e-06	6.93e-06	1.46e-05	carbonic anhydrase [EC:4.2.1.1]	0.12857	0.122331
K01676	0.000338235	0.000160872	0.000206225	0.00045148	0.000196661	0.000283426	0.000270581	0.000220546	0.000346011	0.000380104	0.000374109	0.000264578	0.000432162	0.000337585	0.000355641	0.00019524	0.000173023	0.000266878	0.000267233	0.000197704	0.000216142	0.000269098	0.000307889	0.000322268	0.000272103	0.000357866	fumarate hydratase, class I [EC:4.2.1.2]	0.422398	0.303514
K01677	1.42e-05	1.59e-05	1.67e-05	2.14e-05	7.65e-06	1.91e-05	1.76e-05	1.91e-05	8.14e-06	8.24e-06	1.26e-05	1.06e-05	2.44e-05	1.6e-05	1.45e-05	1.73e-05	1.7e-05	9.64e-06	1.41e-05	1.57e-05	1.57e-05	1.04e-05	1.1e-05	1.16e-05	1.1e-05	1.45e-05	fumarate hydratase subunit alpha [EC:4.2.1.2]	0.247396	0.0201835
K01678	1.11e-05	1.4e-05	1.65e-05	1.57e-05	6.44e-06	1.49e-05	1.31e-05	1.54e-05	6.65e-06	6.48e-06	9.05e-06	7.88e-06	1.76e-05	1.31e-05	1.27e-05	1.67e-05	1.46e-05	8.57e-06	1.31e-05	1.29e-05	1.35e-05	9.61e-06	1.01e-05	8.75e-06	8.3e-06	1.16e-05	fumarate hydratase subunit beta [EC:4.2.1.2]	0.139699	0.0205849
K01679	0.000465497	0.000637876	0.000593426	0.000446138	0.000687577	0.00059496	0.000556967	0.000602791	0.000493452	0.000453337	0.000497798	0.000618764	0.000464065	0.00046348	0.000655581	0.000591874	0.000609887	0.000546801	0.000564117	0.000594984	0.000577104	0.000537741	0.000511006	0.000480973	0.000541523	0.000515152	fumarate hydratase, class II [EC:4.2.1.2]	0.935326	0.0289378
K01681	0.00122154	0.00120707	0.00121469	0.00106729	0.000726393	0.00127615	0.00110602	0.00121529	0.00110875	0.00110174	0.000964749	0.000849791	0.00106617	0.00118443	0.00140444	0.00116964	0.00116231	0.000966505	0.00114964	0.0011181	0.00115704	0.00108214	0.00113031	0.00106024	0.000925405	0.00103364	aconitate hydratase 1 [EC:4.2.1.3]	0.0766624	0.0135912
K01682	0.000409327	0.000591429	0.000547355	0.000575381	0.00103866	0.000722662	0.000618323	0.000598378	0.000637017	0.000548523	0.000701809	0.000943427	0.000608184	0.000381545	0.000555889	0.000474611	0.000491817	0.000634231	0.000622395	0.000545321	0.000564672	0.00057434	0.000519017	0.000459838	0.000638993	0.000563551	aconitate hydratase 2 / 2-methylisocitrate dehydratase [EC:4.2.1.3 4.2.1.99]	0.0873022	0.439544
K01684	0.000326713	0.000234905	0.000258601	0.000321866	0.000194205	0.000250573	0.000299177	0.000253428	0.000295246	0.000316535	0.000280599	0.000218794	0.000303395	0.000320882	0.000234551	0.000258474	0.000243903	0.000269871	0.000297219	0.000268567	0.000271849	0.000289327	0.000304058	0.000305113	0.000268364	0.000299177	galactonate dehydratase [EC:4.2.1.6]	0.867258	0.0594608
K01685	0.000212595	0.000261642	0.000321046	0.000249572	0.00012923	0.000276287	0.00030968	0.00026159	0.000144111	0.000143642	0.000119756	0.000116905	0.000242889	0.000244616	0.000232564	0.0003134	0.00026325	0.0001789	0.000363134	0.000279767	0.00030705	0.000202761	0.000229839	0.000176326	0.000156789	0.000251026	altronate hydrolase [EC:4.2.1.7]	0.0183363	0.0723977
K01686	0.000294457	0.000171671	0.000196729	0.000325251	0.000175938	0.000184728	0.000246356	0.000203746	0.00028682	0.000311855	0.000283261	0.000207757	0.000299806	0.000292347	0.000207143	0.000193692	0.000200094	0.000249695	0.000254241	0.000220842	0.000235755	0.000248401	0.000268926	0.000299104	0.00025535	0.000294256	mannonate dehydratase [EC:4.2.1.8]	0.662809	0.0184401
K01687	0.00103605	0.0010045	0.00107833	0.0011011	0.001154	0.00100841	0.00105223	0.00103948	0.00103693	0.00105911	0.00109565	0.00110921	0.00110068	0.00104081	0.00085595	0.00106584	0.00106059	0.00106845	0.000989536	0.00102591	0.00100916	0.00104408	0.00103262	0.0010606	0.00108657	0.00105965	dihydroxy-acid dehydratase [EC:4.2.1.9]	0.228274	0.303514
K01689	0.000583726	0.000579849	0.000583186	0.000669448	0.000733152	0.000605997	0.000592323	0.000600005	0.000670361	0.000656131	0.000685525	0.000722821	0.000677379	0.000574005	0.000615903	0.000564841	0.000570995	0.000643069	0.000608711	0.000580037	0.000590973	0.000635063	0.000626436	0.000605819	0.000637696	0.000630797	enolase [EC:4.2.1.11]	0.0171139	0.0422235
K01690	0.000497296	0.000335378	0.000350147	0.00043015	0.000286613	0.000323735	0.000375959	0.00035067	0.000426132	0.000468738	0.000428607	0.00032156	0.000404007	0.00049128	0.000326496	0.000380399	0.000376427	0.000399542	0.000321449	0.000370554	0.000355046	0.000401524	0.000415498	0.000476867	0.000418635	0.000402494	phosphogluconate dehydratase [EC:4.2.1.12]	0.953066	0.127375
K01692	0.000780687	0.00074782	0.000753878	0.000637923	0.000443925	0.000714508	0.00075066	0.000731332	0.000555343	0.000608252	0.000568857	0.000462902	0.000620621	0.000773449	0.000622979	0.000771022	0.000737604	0.000583998	0.0006396	0.000716089	0.000680494	0.000609721	0.000642566	0.000684553	0.000608923	0.000644972	enoyl-CoA hydratase [EC:4.2.1.17]	0.0183363	0.19717
K01693	0.000230249	0.000205473	0.000204627	0.000253266	0.00022808	0.000211454	0.000219623	0.000214379	0.00024598	0.000245259	0.00024641	0.000236842	0.000251046	0.000220095	0.000218138	0.000190388	0.000200501	0.000224914	0.000213264	0.000205468	0.000209586	0.000223213	0.000223761	0.000229346	0.000226684	0.000230127	imidazoleglycerol-phosphate dehydratase [EC:4.2.1.19]	0.106323	0.00802281
K01695	0.000326311	0.000338628	0.000337995	0.000381573	0.000461092	0.000339272	0.000338444	0.000344892	0.00038257	0.000368709	0.000403426	0.000436732	0.000384939	0.000315211	0.000273109	0.000320346	0.000316782	0.000374175	0.000331059	0.000324267	0.000331225	0.000356486	0.000341575	0.000347319	0.000375341	0.000362983	tryptophan synthase alpha chain [EC:4.2.1.20]	0.0181199	0.00925754
K01696	0.000569916	0.000603871	0.000611056	0.000677912	0.000733162	0.000614683	0.000616849	0.000620471	0.000647979	0.000619032	0.00066738	0.000714715	0.00068742	0.000575679	0.000500523	0.000592831	0.000590851	0.000641539	0.000645406	0.000608797	0.000631581	0.000626964	0.000607139	0.000604868	0.000637332	0.000641335	tryptophan synthase beta chain [EC:4.2.1.20]	0.0364627	0.104397
K01697	0.000386626	0.000585619	0.000551483	0.000305244	0.000257719	0.000545634	0.000415628	0.000525424	0.000377052	0.000313839	0.000264911	0.000314809	0.000331609	0.000330858	0.000474267	0.000468328	0.000435842	0.000306542	0.000494648	0.000433249	0.000481064	0.000381236	0.000371629	0.000269763	0.000255552	0.000316165	cystathionine beta-synthase [EC:4.2.1.22]	0.0245663	0.0389905
K01698	0.000458064	0.000450987	0.000452965	0.000530552	0.000609547	0.000467309	0.000460502	0.000467155	0.000543445	0.000529114	0.000563221	0.000597205	0.000537704	0.000454405	0.000496663	0.000438878	0.000454891	0.00052372	0.000463841	0.000454245	0.000458153	0.000504764	0.000488266	0.000491247	0.000522431	0.000498264	porphobilinogen synthase [EC:4.2.1.24]	0.0171139	0.0410028
K01699	9.3e-07	7.2e-07	1.07e-06	2.07e-06	3.64e-07	5.33e-07	5.18e-07	9.81e-07	2.32e-07	1.25e-06	1.06e-06	6.42e-07	1.58e-06	5.54e-07	2.36e-06	6.85e-07	3.07e-07	2.99e-07	3.87e-07	3.46e-07	3.25e-07	4.44e-07	7.3e-07	7.27e-07	5.98e-07	2.14e-06	propanediol dehydratase large subunit [EC:4.2.1.28]	0.848533	0.962607
K01703	0.000633128	0.00058741	0.000603005	0.000685159	0.000735027	0.000608844	0.000617018	0.000615468	0.000694116	0.000683502	0.000715132	0.000727539	0.000687542	0.000602352	0.000504188	0.000566456	0.000572425	0.000652159	0.000573938	0.00057801	0.000591593	0.000630844	0.000617999	0.00063705	0.000658779	0.000632373	3-isopropylmalate/(R)-2-methylmalate dehydratase large subunit [EC:4.2.1.33 4.2.1.35]	0.0181199	0.00545091
K01704	0.000323753	0.000291995	0.00029608	0.000340559	0.000342553	0.000295146	0.000303576	0.00030229	0.000349418	0.000347157	0.00035239	0.000346579	0.000338027	0.000300535	0.000246248	0.000270822	0.000276776	0.000312609	0.000281906	0.000280874	0.000287849	0.000309297	0.000305581	0.000316584	0.000315672	0.000307508	3-isopropylmalate/(R)-2-methylmalate dehydratase small subunit [EC:4.2.1.33 4.2.1.35]	0.0200245	0.00523274
K01705	5.27e-08	8.15e-10	5.63e-10	1.05e-07	6.4e-10	1.59e-08	5.91e-10	1.69e-08	1.08e-09	3.44e-09	4.96e-08	7.61e-10	3.92e-08	1.52e-08	1.89e-07	5.74e-09	0	2.54e-09	1.33e-08	1.47e-08	1.36e-08	7.04e-09	1.72e-08	1.63e-08	2.28e-09	1.01e-07	homoaconitate hydratase [EC:4.2.1.36]	0.692633	0.799267
K01706	7.01e-05	1.47e-05	2.92e-05	8.57e-05	6.3e-05	6.77e-05	4.68e-05	3.6e-05	8.8e-05	9.96e-05	9.66e-05	7.27e-05	7.75e-05	6.88e-05	6.65e-05	3.58e-05	2.56e-05	6.43e-05	4.41e-05	2.93e-05	3.32e-05	6.21e-05	7.07e-05	7.58e-05	6.61e-05	7.49e-05	glucarate dehydratase [EC:4.2.1.40]	0.0574676	0.0893125
K01707	1.81e-05	1.53e-05	1.92e-05	1.26e-05	1.02e-05	3.01e-05	1.99e-05	1.89e-05	9.03e-06	1.23e-05	1.32e-05	9.73e-06	1.28e-05	2.54e-05	2.55e-05	3e-05	2.28e-05	1.5e-05	2.11e-05	2.21e-05	2.14e-05	1.57e-05	1.93e-05	1.69e-05	1.53e-05	1.82e-05	5-dehydro-4-deoxyglucarate dehydratase [EC:4.2.1.41]	0.120845	0.00545091
K01708	9.24e-05	0.00010372	0.000118876	8.1e-05	5.8e-05	0.000112823	0.000109513	0.000106206	5.54e-05	5.92e-05	5.15e-05	4.86e-05	7.79e-05	8.76e-05	9.48e-05	0.000113011	8.99e-05	5.99e-05	9.54e-05	8.72e-05	8.92e-05	6.78e-05	7.77e-05	6.38e-05	5.66e-05	8.14e-05	galactarate dehydratase [EC:4.2.1.42]	0.0214166	0.0135711
K01709	0.000113318	4.06e-05	6.04e-05	0.000163091	0.000148577	7.73e-05	9.16e-05	6.33e-05	0.000155701	0.000164446	0.000171344	0.000149522	0.000153125	0.000113845	7.86e-05	5.98e-05	5.46e-05	0.000133214	9.36e-05	6.87e-05	7.46e-05	0.000117126	0.000119414	0.000136237	0.00013537	0.000142496	CDP-glucose 4,6-dehydratase [EC:4.2.1.45]	0.0381699	0.00632805
K01710	0.000819506	0.00101723	0.000974842	0.000848732	0.00102922	0.00102369	0.000923334	0.000967876	0.00092578	0.000863343	0.000881932	0.00100675	0.000877002	0.000812115	0.00110656	0.000940538	0.000943695	0.000919442	0.000999819	0.000947025	0.000961388	0.000929813	0.000915631	0.000826401	0.000876683	0.000882003	dTDP-glucose 4,6-dehydratase [EC:4.2.1.46]	0.976878	0.091364
K01711	0.000363988	0.000260329	0.00031316	0.000505809	0.000623318	0.000316722	0.000343298	0.000304034	0.000504803	0.000513007	0.000565711	0.000579169	0.000496455	0.000387461	0.000318372	0.000347663	0.00033051	0.000505655	0.000351643	0.000334655	0.000339396	0.000459226	0.000447971	0.00047163	0.00050409	0.000481316	GDPmannose 4,6-dehydratase [EC:4.2.1.47]	0.0285115	0.00775544
K01712	0.000627922	0.00064892	0.000618575	0.000508377	0.000338772	0.000608618	0.000549652	0.000621722	0.000584443	0.0005589	0.000467994	0.000430595	0.000506795	0.000573584	0.000648413	0.000566681	0.000567155	0.000470494	0.000596963	0.000564312	0.000594951	0.000550963	0.000557206	0.000503734	0.000442482	0.000490303	urocanate hydratase [EC:4.2.1.49]	0.040597	0.0265309
K01713	1.89e-06	5.04e-07	3.05e-06	8.76e-06	8.64e-06	1.49e-05	5.24e-06	6.5e-06	2.45e-06	3.31e-06	3.45e-06	2.52e-06	7.74e-06	5.31e-06	1.01e-05	5.19e-06	2.07e-06	1.69e-06	4.59e-06	1.57e-06	1.31e-06	2.54e-06	5.31e-06	2.36e-06	1.54e-06	4.24e-06	cyclohexadienyl dehydratase [EC:4.2.1.51 4.2.1.91]	0.611016	0.450329
K01714	0.000873937	0.000745366	0.000750904	0.000871602	0.000761092	0.000738118	0.000758022	0.000755074	0.000873559	0.00089757	0.000879936	0.000797587	0.000847757	0.000866849	0.000782712	0.000773337	0.000761127	0.000828751	0.000745463	0.000765247	0.000763238	0.000827547	0.000835915	0.000884871	0.00083709	0.000844428	dihydrodipicolinate synthase [EC:4.2.1.52]	0.115691	0.0831466
K01715	0.000473778	0.000572149	0.000545329	0.000362925	0.000251932	0.000506444	0.000488925	0.000526935	0.000349219	0.000338528	0.000296922	0.000283808	0.0003679	0.000441601	0.000447874	0.000506511	0.000489796	0.000334865	0.000475114	0.000485055	0.000488001	0.000383392	0.000391545	0.000362916	0.000325885	0.000376072	3-hydroxybutyryl-CoA dehydratase [EC:4.2.1.55]	0.0183363	0.014218
K01716	0.000151721	0.00012045	0.000128598	0.000156044	9.01e-05	0.000103481	0.000123992	0.000125604	0.000126887	0.000135245	0.000130422	0.000102292	0.000154183	0.000150503	0.000109308	0.000131594	0.0001303	0.000122094	0.000109451	0.000124133	0.000122494	0.000125557	0.000128073	0.000142565	0.000125793	0.000133115	3-hydroxydecanoyl-[acyl-carrier-protein] dehydratase [EC:4.2.1.60]	0.958235	0.643085
K01719	0.000346199	0.00040475	0.000388279	0.000366076	0.00040686	0.00038254	0.000345503	0.000390052	0.000396215	0.000368665	0.000378569	0.000411422	0.000381228	0.000323297	0.000372962	0.000356787	0.000351111	0.000363186	0.000362578	0.000349431	0.000364127	0.000371249	0.000354535	0.000334119	0.00034636	0.000344095	uroporphyrinogen-III synthase [EC:4.2.1.75]	0.72764	0.572304
K01720	3.92e-05	4.28e-05	4.46e-05	4.14e-05	3.5e-05	5.67e-05	4.8e-05	4.93e-05	2.34e-05	3.18e-05	3.04e-05	2.46e-05	4.18e-05	7.38e-05	6.38e-05	8.35e-05	8.22e-05	5.04e-05	6.53e-05	7.65e-05	7.07e-05	5.28e-05	5.8e-05	5.68e-05	5.26e-05	5.26e-05	2-methylcitrate dehydratase [EC:4.2.1.79]	0.0970362	0.0130807
K01721	0.000153253	0.000123682	0.000119956	0.000119025	9.36e-05	8.88e-05	0.000127766	0.000120389	0.000126254	0.000136067	0.000122849	9.9e-05	0.000114668	0.000137031	8.23e-05	0.000111637	0.000119915	0.000117602	9.55e-05	0.000115945	0.000109517	0.000117041	0.000114758	0.000136595	0.000123572	0.000106029	nitrile hydratase [EC:4.2.1.84]	0.738549	0.434279
K01724	0.000161756	0.00011004	0.000113243	0.000185748	0.00023719	0.000127314	0.000131327	0.000125569	0.000217103	0.000219149	0.000230133	0.000229634	0.000180835	0.000147883	0.000122537	0.000106892	0.000116621	0.000191729	0.0001124	0.000118274	0.000117182	0.000174371	0.000167637	0.000187452	0.00019586	0.000170157	4a-hydroxytetrahydrobiopterin dehydratase [EC:4.2.1.96]	0.0180541	0.0184401
K01725	1.46e-06	5.28e-07	1.72e-06	2.07e-05	7.66e-05	1.41e-05	1.03e-05	5.43e-06	2.98e-05	2.8e-05	4.42e-05	6.08e-05	2.14e-05	2.92e-06	8.52e-06	4.25e-06	5.92e-06	4.06e-05	4.94e-06	6.57e-06	3.03e-06	2.54e-05	1.97e-05	2.51e-05	4.32e-05	2.63e-05	cyanate lyase [EC:4.2.1.104]	0.0180133	0.0504773
K01726	2.29e-05	2.6e-05	3.13e-05	2.38e-05	1.56e-05	2.89e-05	2.37e-05	2.51e-05	1.45e-05	1.62e-05	1.66e-05	1.49e-05	2.3e-05	2.41e-05	3.03e-05	3.25e-05	2.45e-05	1.76e-05	2.31e-05	2.27e-05	2.22e-05	1.97e-05	2.39e-05	2.02e-05	1.72e-05	2.77e-05	[EC:4.2.1.-]	0.0264229	0.0580741
K01727	4.31e-07	8.4e-07	1.2e-06	4.99e-07	2.62e-07	2.21e-06	9.9e-07	1.14e-06	1.78e-07	5.29e-07	4.8e-07	3.81e-07	4.52e-07	2.65e-07	1.85e-06	4.2e-07	6.69e-07	5.87e-08	4.8e-07	2.02e-07	2.03e-07	1.92e-07	2.91e-07	8.04e-08	1.74e-07	3.85e-07	hyaluronate lyase [EC:4.2.2.1]	0.0892794	0.0289378
K01728	4.75e-06	5.74e-06	9.15e-06	4.13e-06	3.3e-06	3.06e-05	1.23e-05	1.29e-05	3.52e-06	4.92e-06	5.31e-06	4.41e-06	4.62e-06	6.53e-06	2.13e-05	9.12e-06	9.1e-06	4.62e-06	1.32e-05	9.22e-06	1e-05	5.8e-06	9.73e-06	4.97e-06	5.18e-06	8.6e-06	pectate lyase [EC:4.2.2.2]	0.25991	0.0594608
K01729	0.000132701	0.000190371	0.000204934	8.78e-05	7.6e-05	0.000196536	0.000141698	0.000196457	0.000140279	0.000110058	6.88e-05	0.000100094	9.66e-05	0.000127563	0.00017422	0.000197206	0.000189158	0.000111463	0.000207805	0.000178256	0.000202455	0.000164153	0.000162285	8.63e-05	8.26e-05	9.98e-05	poly(beta-D-mannuronate) lyase [EC:4.2.2.3]	0.039974	0.0504773
K01730	1.7e-07	1.12e-07	1.31e-08	1.43e-06	6.06e-08	5.96e-08	2.03e-08	9.84e-08	1.77e-07	4.56e-07	6.96e-07	2.2e-07	1.64e-06	1.82e-07	1.05e-06	2.71e-08	2.49e-08	6.57e-08	1.34e-07	3.79e-08	2.54e-08	3.17e-07	2.88e-07	1.2e-07	1.55e-07	1.42e-06	oligogalacturonide lyase [EC:4.2.2.6]	0.2026	0.464282
K01731	7.91e-08	1.16e-07	1.48e-07	6.84e-08	1.94e-08	9.62e-08	1.14e-07	1.55e-07	1.6e-08	4.61e-07	4.52e-08	5.74e-08	2.41e-08	1.45e-07	5.92e-07	6.29e-08	2.53e-08	9.61e-09	3e-08	9.71e-09	1.69e-08	6.71e-08	3.78e-08	1.61e-08	3.24e-08	6.94e-08	pectate disaccharide-lyase [EC:4.2.2.9]	0.0911963	0.384467
K01732	6.29e-08	1.05e-08	1.37e-07	3.81e-08	1.17e-07	6.83e-07	2.09e-07	2.54e-07	3.39e-08	5.2e-08	7.72e-08	5.02e-08	3.06e-08	1.14e-07	5.07e-07	3.2e-07	1.21e-07	2.89e-08	2.08e-07	5.82e-08	5.1e-08	2.32e-08	5.84e-08	4.1e-08	3.58e-08	9.21e-08	[EC:4.2.2.10]	0.953066	0.0201835
K01733	0.000443727	0.000438791	0.000501506	0.000586648	0.000756961	0.000501123	0.00048803	0.000487101	0.000579792	0.000569541	0.000628387	0.00070129	0.000596703	0.000469734	0.000436664	0.000500767	0.000519732	0.000604576	0.00050004	0.000493647	0.000493522	0.000563609	0.000544294	0.00054262	0.000604759	0.000565787	threonine synthase [EC:4.2.3.1]	0.0312238	0.0335773
K01734	2.21e-05	3.36e-05	3.11e-05	2.42e-05	3.66e-05	3.33e-05	2.57e-05	2.8e-05	2.45e-05	2.14e-05	2.73e-05	3.29e-05	2.45e-05	1.85e-05	2.68e-05	2.75e-05	1.91e-05	2.76e-05	2.39e-05	2.17e-05	2.32e-05	2.5e-05	2.37e-05	2.24e-05	2.66e-05	3.18e-05	methylglyoxal synthase [EC:4.2.3.3]	0.92487	0.587838
K01735	0.000480265	0.000522224	0.000516636	0.00054837	0.000642524	0.000525622	0.000509637	0.000528026	0.000549602	0.000530045	0.000570234	0.000621505	0.000563237	0.000489555	0.000523712	0.000519259	0.00053419	0.000559901	0.000523929	0.000527906	0.000525922	0.000543631	0.000526205	0.000520584	0.00055702	0.000535032	3-dehydroquinate synthase [EC:4.2.3.4]	0.0183363	0.206358
K01736	0.000407479	0.000416353	0.000420358	0.000470972	0.000499264	0.000431018	0.000425684	0.000426577	0.00045779	0.000446435	0.000468884	0.000491894	0.00047599	0.000404038	0.000414075	0.000403962	0.000409551	0.000446179	0.000435398	0.000414265	0.000422269	0.000437647	0.000430153	0.000422686	0.00044252	0.000443603	chorismate synthase [EC:4.2.3.5]	0.0312238	0.0146673
K01737	0.000156744	0.000247445	0.00021671	0.000224459	0.00043923	0.000256551	0.000218328	0.000235504	0.000272625	0.000231761	0.000294001	0.000396907	0.000241163	0.000132089	0.000245371	0.000181731	0.000197305	0.000268446	0.000218033	0.000206099	0.000210044	0.000238677	0.000212629	0.00019632	0.000264151	0.000233406	6-pyruvoyl tetrahydrobiopterin synthase [EC:4.2.3.12]	0.0440073	0.356856
K01738	0.000730505	0.000739225	0.000747654	0.000817728	0.00110544	0.00075309	0.000749119	0.000748756	0.000887436	0.000865851	0.000943571	0.00103167	0.000824827	0.000691021	0.000647312	0.000704798	0.000703177	0.000878438	0.000700614	0.000706326	0.000706875	0.000815999	0.000777495	0.000798565	0.000879774	0.000804613	cysteine synthase A [EC:2.5.1.47]	0.0180541	0.0172019
K01739	0.000566442	0.000694194	0.000663292	0.000663298	0.000926576	0.000677959	0.000682679	0.000663631	0.000692095	0.000648798	0.000735526	0.000855079	0.000683876	0.000578748	0.00063614	0.000661578	0.000671977	0.000735922	0.000697922	0.000685405	0.000686523	0.000694604	0.000657837	0.000654019	0.000725993	0.000683354	cystathionine gamma-synthase [EC:2.5.1.48]	0.177949	0.37941
K01740	0.00109077	0.000941959	0.000988825	0.00111904	0.00101614	0.000952083	0.000957528	0.0009764	0.0011757	0.00119012	0.00113775	0.00106804	0.00110712	0.00108026	0.000985441	0.000988225	0.000994364	0.00108935	0.000995082	0.00097646	0.00100138	0.00111034	0.00111542	0.00110982	0.0010675	0.00104371	O-acetylhomoserine (thiol)-lyase [EC:2.5.1.49]	0.0951653	0.0135912
[truncated: 5,260 more rows]
