# Supplementary material for: Linking Compositional and Functional Predictions to Decipher the Biogeochemical Significance in DFAA Turnover of Abundant Bacterioplankton Lineages in the North Sea
Source: Microorganisms. 2017 Nov 5;5(4):68. doi: 10.3390/microorganisms5040068 (PMC5748577; doi:10.3390/microorganisms5040068)
Supplement: Supplementary file 1 [file microorganisms-05-00068-s001.zip › Table_S8.XLS]

## Sheet: Table S8
Table S8. Results of the PERMANOVA analysis for all recorded parameters using different distance measures. Marginal significant P values (P <= 0.1) are given in bold and are underlined once. Significant P values (P <= 0.05) are given in bold and are underlined twice. The highest coefficient of determination (R2) for each distance measure is given in bold. BC = Bray-Curtis, WU = weighted unifrac, …
Environmental property	Distance	DNA		RNA
	measure	R2	P	R2	P
Biomass production	BC	0.094203	0.282	0.109679	0.215
Biomass production	WU	0.137936	0.163	0.144966	0.124
Biomass production	UU	0.0898985	0.267	0.0928408	0.174
Biomass production	vaWU	0.103461	0.229	0.129924	0.094
Biomass production	GUa0	0.089398	0.269	0.0963109	0.067
Biomass production	GUa0.5	0.101232	0.211	0.128254	0.082
Bloom presence	BC	0.0583854	0.666	0.0718046	0.542
Bloom presence	WU	0.0853921	0.345	0.100037	0.265
Bloom presence	UU	0.0677949	0.842	0.0944534	0.14
Bloom presence	vaWU	0.0654121	0.629	0.0631016	0.723
Bloom presence	GUa0	0.0721878	0.714	0.0835453	0.413
Bloom presence	GUa0.5	0.0658687	0.588	0.0691917	0.631
Cell numbers	BC	0.0938315	0.286	0.102822	0.272
Cell numbers	WU	0.0713398	0.447	0.0915314	0.388
Cell numbers	UU	0.0865066	0.343	0.0921662	0.185
Cell numbers	vaWU	0.0868585	0.362	0.119486	0.148
Cell numbers	GUa0	0.0938463	0.195	0.0945933	0.114
Cell numbers	GUa0.5	0.0880414	0.312	0.115213	0.143
Chlorophyll a content	BC	0.165089	0.056	0.161845	0.033
Chlorophyll a content	WU	0.232079	0.042	0.194423	0.044
Chlorophyll a content	UU	0.116628	0.054	0.112819	0.013
Chlorophyll a content	vaWU	0.181988	0.031	0.167858	0.018
Chlorophyll a content	GUa0	0.114872	0.037	0.114829	0.004
Chlorophyll a content	GUa0.5	0.181458	0.033	0.170255	0.016
DFAA turnover	BC	0.232253	0.003	0.266665	0.001
DFAA turnover	WU	0.356909	0.006	0.3834	0.001
DFAA turnover	UU	0.139868	0.007	0.139322	0.001
DFAA turnover	vaWU	0.239261	0.01	0.263698	0.001
DFAA turnover	GUa0	0.128734	0.012	0.128207	0.001
DFAA turnover	GUa0.5	0.233084	0.011	0.262804	0.001
Fluorescence	BC	0.148914	0.088	0.173761	0.025
Fluorescence	WU	0.178708	0.098	0.150028	0.124
Fluorescence	UU	0.110795	0.081	0.110332	0.03
Fluorescence	vaWU	0.163623	0.064	0.146517	0.049
Fluorescence	GUa0	0.116917	0.041	0.112261	0.005
Fluorescence	GUa0.5	0.164349	0.06	0.14695	0.041
Glucose turnover	BC	0.163238	0.057	0.250317	0.001
Glucose turnover	WU	0.20908	0.056	0.259378	0.018
Glucose turnover	UU	0.115934	0.056	0.135362	0.001
Glucose turnover	vaWU	0.155428	0.082	0.204976	0.009
Glucose turnover	GUa0	0.107396	0.082	0.121168	0.003
Glucose turnover	GUa0.5	0.151343	0.072	0.201817	0.003
Latitude	BC	0.225826	0.012	0.189759	0.007
Latitude	WU	0.250166	0.028	0.24114	0.019
Latitude	UU	0.135706	0.011	0.136617	0.001
Latitude	vaWU	0.217625	0.016	0.192136	0.008
Latitude	GUa0	0.12438	0.014	0.117377	0.001
Latitude	GUa0.5	0.211852	0.012	0.195825	0.004
Longitude	BC	0.16852	0.048	0.183926	0.017
Longitude	WU	0.214264	0.055	0.277857	0.008
Longitude	UU	0.114243	0.061	0.118913	0.004
Longitude	vaWU	0.186666	0.039	0.218586	0.001
Longitude	GUa0	0.119151	0.026	0.117797	0.001
Longitude	GUa0.5	0.187424	0.03	0.21575	0.001
Oxygen content	BC	0.0650989	0.599	0.074742	0.523
Oxygen content	WU	0.0685831	0.456	0.0843347	0.41
Oxygen content	UU	0.109989	0.084	0.0799799	0.555
Oxygen content	vaWU	0.0801042	0.401	0.0781997	0.487
Oxygen content	GUa0	0.090995	0.266	0.0810845	0.541
Oxygen content	GUa0.5	0.0786316	0.444	0.0777451	0.522
Phaeopigment content	BC	0.215786	0.019	0.175845	0.021
Phaeopigment content	WU	0.278992	0.018	0.220272	0.027
Phaeopigment content	UU	0.133633	0.019	0.112535	0.013
Phaeopigment content	vaWU	0.219902	0.016	0.17605	0.016
Phaeopigment content	GUa0	0.126964	0.016	0.109694	0.01
Phaeopigment content	GUa0.5	0.217827	0.016	0.178382	0.008
Salinity	BC	0.0798936	0.449	0.075326	0.526
Salinity	WU	0.0679646	0.459	0.0889097	0.366
Salinity	UU	0.0932193	0.229	0.0871358	0.337
Salinity	vaWU	0.0900826	0.321	0.101556	0.244
Salinity	GUa0	0.09417	0.185	0.0877774	0.293
Salinity	GUa0.5	0.0894795	0.325	0.103393	0.239
Temperature	BC	0.071034	0.578	0.0691854	0.527
Temperature	WU	0.0815413	0.373	0.0772759	0.46
Temperature	UU	0.082903	0.437	0.085677	0.412
Temperature	vaWU	0.0792538	0.442	0.0830465	0.451
Temperature	GUa0	0.0824868	0.475	0.0840509	0.426
Temperature	GUa0.5	0.0763783	0.473	0.0835469	0.441
Transmission	BC	0.100373	0.281	0.146489	0.065
Transmission	WU	0.134112	0.122	0.127413	0.18
Transmission	UU	0.100567	0.142	0.0957757	0.122
Transmission	vaWU	0.118179	0.165	0.133579	0.074
Transmission	GUa0	0.0976023	0.159	0.104304	0.04
Transmission	GUa0.5	0.117441	0.197	0.129861	0.086
AVERAGE	BC	0.133349	-	0.144493	-
AVERAGE	WU	0.168335	-	0.176226	-
AVERAGE	UU	0.106684	-	0.106431	-
AVERAGE	vaWU	0.140325	-	0.148631	-
AVERAGE	GUa0	0.103245	-	0.103134	-
AVERAGE	GUa0.5	0.138466	-	0.148618	-
