# Supplementary material for: Linking Compositional and Functional Predictions to Decipher the Biogeochemical Significance in DFAA Turnover of Abundant Bacterioplankton Lineages in the North Sea
Source: Microorganisms. 2017 Nov 5;5(4):68. doi: 10.3390/microorganisms5040068 (PMC5748577; doi:10.3390/microorganisms5040068)
Supplement: Supplementary file 1 [file microorganisms-05-00068-s001.zip › Table_S9.xls]

## Sheet: wu_dist
Table S9. Distance matrix based on weighted-unifrac measures. The matrix was generated in R using the GUniFrac package.
Station	DNA													RNA
	1	2	3	6	7	8	10	11	12	13	14	15	16	1	2	3	6	7	8	10	11	12	13	14	15	16
DNA
1	0	0.255104	0.219244	0.318317	0.415869	0.322612	0.184535	0.203293	0.296916	0.288448	0.375262	0.343002	0.320522	0.197056	0.409813	0.153172	0.217291	0.36217	0.301469	0.227927	0.243492	0.320449	0.310559	0.373452	0.405255	0.400286
2	0.255104	0	0.1233	0.418145	0.513642	0.238626	0.255661	0.165573	0.351462	0.40161	0.506122	0.447864	0.397976	0.409842	0.365221	0.204902	0.262954	0.487563	0.284614	0.274736	0.240422	0.403297	0.418084	0.547091	0.546992	0.458339
3	0.219244	0.1233	0	0.374895	0.479876	0.20161	0.206636	0.125537	0.312689	0.362847	0.458968	0.412691	0.351683	0.366154	0.343212	0.154393	0.233274	0.462879	0.23319	0.246201	0.195622	0.369487	0.380432	0.51461	0.523161	0.409431
6	0.318317	0.418145	0.374895	0	0.349454	0.343381	0.267595	0.328585	0.236456	0.219111	0.270038	0.2676	0.0649078	0.345904	0.39008	0.340737	0.312637	0.305217	0.285097	0.286775	0.296711	0.24638	0.21378	0.309649	0.351353	0.182303
7	0.415869	0.513642	0.479876	0.349454	0	0.439658	0.380973	0.409949	0.281717	0.276213	0.18916	0.133192	0.357278	0.402688	0.479778	0.425429	0.39763	0.20293	0.39537	0.378989	0.403598	0.298781	0.319318	0.307698	0.20705	0.372297
8	0.322612	0.238626	0.20161	0.343381	0.439658	0	0.210175	0.153085	0.29072	0.327656	0.427427	0.368023	0.318003	0.394658	0.287845	0.245304	0.253673	0.444885	0.197947	0.225438	0.196948	0.35329	0.334717	0.494839	0.502584	0.371899
10	0.184535	0.255661	0.206636	0.267595	0.380973	0.210175	0	0.152378	0.26689	0.257641	0.341723	0.314496	0.263081	0.277803	0.37163	0.149817	0.174329	0.364771	0.216357	0.157916	0.182099	0.301185	0.268889	0.406186	0.42682	0.345123
11	0.203293	0.165573	0.125537	0.328585	0.409949	0.153085	0.152378	0	0.262278	0.290835	0.406474	0.356941	0.303708	0.339317	0.32155	0.154784	0.182264	0.417999	0.180604	0.190673	0.151574	0.326086	0.310028	0.469916	0.477651	0.374262
12	0.296916	0.351462	0.312689	0.236456	0.281717	0.29072	0.26689	0.262278	0	0.105377	0.218786	0.193421	0.218762	0.351097	0.362044	0.275683	0.248422	0.199756	0.232893	0.229879	0.231632	0.109774	0.155088	0.234231	0.253641	0.224293
13	0.288448	0.40161	0.362847	0.219111	0.276213	0.327656	0.257641	0.290835	0.105377	0	0.199193	0.199437	0.211849	0.328106	0.384392	0.292722	0.262981	0.197629	0.273557	0.243735	0.268849	0.132921	0.105071	0.230546	0.252128	0.233881
14	0.375262	0.506122	0.458968	0.270038	0.18916	0.427427	0.341723	0.406474	0.218786	0.199193	0	0.151345	0.290282	0.33139	0.461386	0.400876	0.378557	0.13792	0.380675	0.354853	0.382614	0.237216	0.244789	0.189104	0.150019	0.287666
15	0.343002	0.447864	0.412691	0.2676	0.133192	0.368023	0.314496	0.356941	0.193421	0.199437	0.151345	0	0.273547	0.386308	0.416872	0.364417	0.335483	0.161852	0.331399	0.318707	0.344074	0.229815	0.25559	0.285454	0.194031	0.298703
16	0.320522	0.397976	0.351683	0.0649078	0.357278	0.318003	0.263081	0.303708	0.218762	0.211849	0.290282	0.273547	0	0.36308	0.368083	0.323826	0.291644	0.321274	0.262818	0.274683	0.270048	0.23369	0.20804	0.328555	0.36617	0.170182
RNA
1	0.197056	0.409842	0.366154	0.345904	0.402688	0.394658	0.277803	0.339317	0.351097	0.328106	0.33139	0.386308	0.36308	0	0.446576	0.263267	0.290044	0.336732	0.329161	0.270471	0.278025	0.343224	0.306532	0.300897	0.341047	0.412927
2	0.409813	0.365221	0.343212	0.39008	0.479778	0.287845	0.37163	0.32155	0.362044	0.384392	0.461386	0.416872	0.368083	0.446576	0	0.378714	0.355156	0.467982	0.278463	0.356056	0.303868	0.386466	0.382451	0.514559	0.514632	0.384393
3	0.153172	0.204902	0.154393	0.340737	0.425429	0.245304	0.149817	0.154784	0.275683	0.292722	0.400876	0.364417	0.323826	0.263267	0.378714	0	0.138104	0.376969	0.233493	0.167248	0.192228	0.306516	0.306223	0.418375	0.431918	0.399349
6	0.217291	0.262954	0.233274	0.312637	0.39763	0.253673	0.174329	0.182264	0.248422	0.262981	0.378557	0.335483	0.291644	0.290044	0.355156	0.138104	0	0.336814	0.209996	0.116303	0.169702	0.264789	0.268458	0.364787	0.382712	0.368624
7	0.36217	0.487563	0.462879	0.305217	0.20293	0.444885	0.364771	0.417999	0.199756	0.197629	0.13792	0.161852	0.321274	0.336732	0.467982	0.376969	0.336814	0	0.364702	0.309414	0.340424	0.166642	0.209177	0.164734	0.0915387	0.291557
8	0.301469	0.284614	0.23319	0.285097	0.39537	0.197947	0.216357	0.180604	0.232893	0.273557	0.380675	0.331399	0.262818	0.329161	0.278463	0.233493	0.209996	0.364702	0	0.161503	0.0989472	0.271651	0.251655	0.40197	0.421924	0.317072
10	0.227927	0.274736	0.246201	0.286775	0.378989	0.225438	0.157916	0.190673	0.229879	0.243735	0.354853	0.318707	0.274683	0.270471	0.356056	0.167248	0.116303	0.309414	0.161503	0	0.113563	0.238749	0.228398	0.329845	0.360546	0.339301
11	0.243492	0.240422	0.195622	0.296711	0.403598	0.196948	0.182099	0.151574	0.231632	0.268849	0.382614	0.344074	0.270048	0.278025	0.303868	0.192228	0.169702	0.340424	0.0989472	0.113563	0	0.249398	0.239814	0.38293	0.403834	0.32545
12	0.320449	0.403297	0.369487	0.24638	0.298781	0.35329	0.301185	0.326086	0.109774	0.132921	0.237216	0.229815	0.23369	0.343224	0.386466	0.306516	0.264789	0.166642	0.271651	0.238749	0.249398	0	0.129183	0.18508	0.215468	0.197888
13	0.310559	0.418084	0.380432	0.21378	0.319318	0.334717	0.268889	0.310028	0.155088	0.105071	0.244789	0.25559	0.20804	0.306532	0.382451	0.306223	0.268458	0.209177	0.251655	0.228398	0.239814	0.129183	0	0.221061	0.252102	0.217908
14	0.373452	0.547091	0.51461	0.309649	0.307698	0.494839	0.406186	0.469916	0.234231	0.230546	0.189104	0.285454	0.328555	0.300897	0.514559	0.418375	0.364787	0.164734	0.40197	0.329845	0.38293	0.18508	0.221061	0	0.140736	0.27085
15	0.405255	0.546992	0.523161	0.351353	0.20705	0.502584	0.42682	0.477651	0.253641	0.252128	0.150019	0.194031	0.36617	0.341047	0.514632	0.431918	0.382712	0.0915387	0.421924	0.360546	0.403834	0.215468	0.252102	0.140736	0	0.321413
16	0.400286	0.458339	0.409431	0.182303	0.372297	0.371899	0.345123	0.374262	0.224293	0.233881	0.287666	0.298703	0.170182	0.412927	0.384393	0.399349	0.368624	0.291557	0.317072	0.339301	0.32545	0.197888	0.217908	0.27085	0.321413	0
