# Supplementary figures and images for: Linking Compositional and Functional Predictions to Decipher the Biogeochemical Significance in DFAA Turnover of Abundant Bacterioplankton Lineages in the North Sea
Source: MDPI journal article supplement (doi:10.3390/microorganisms5040068), 2017-11-05

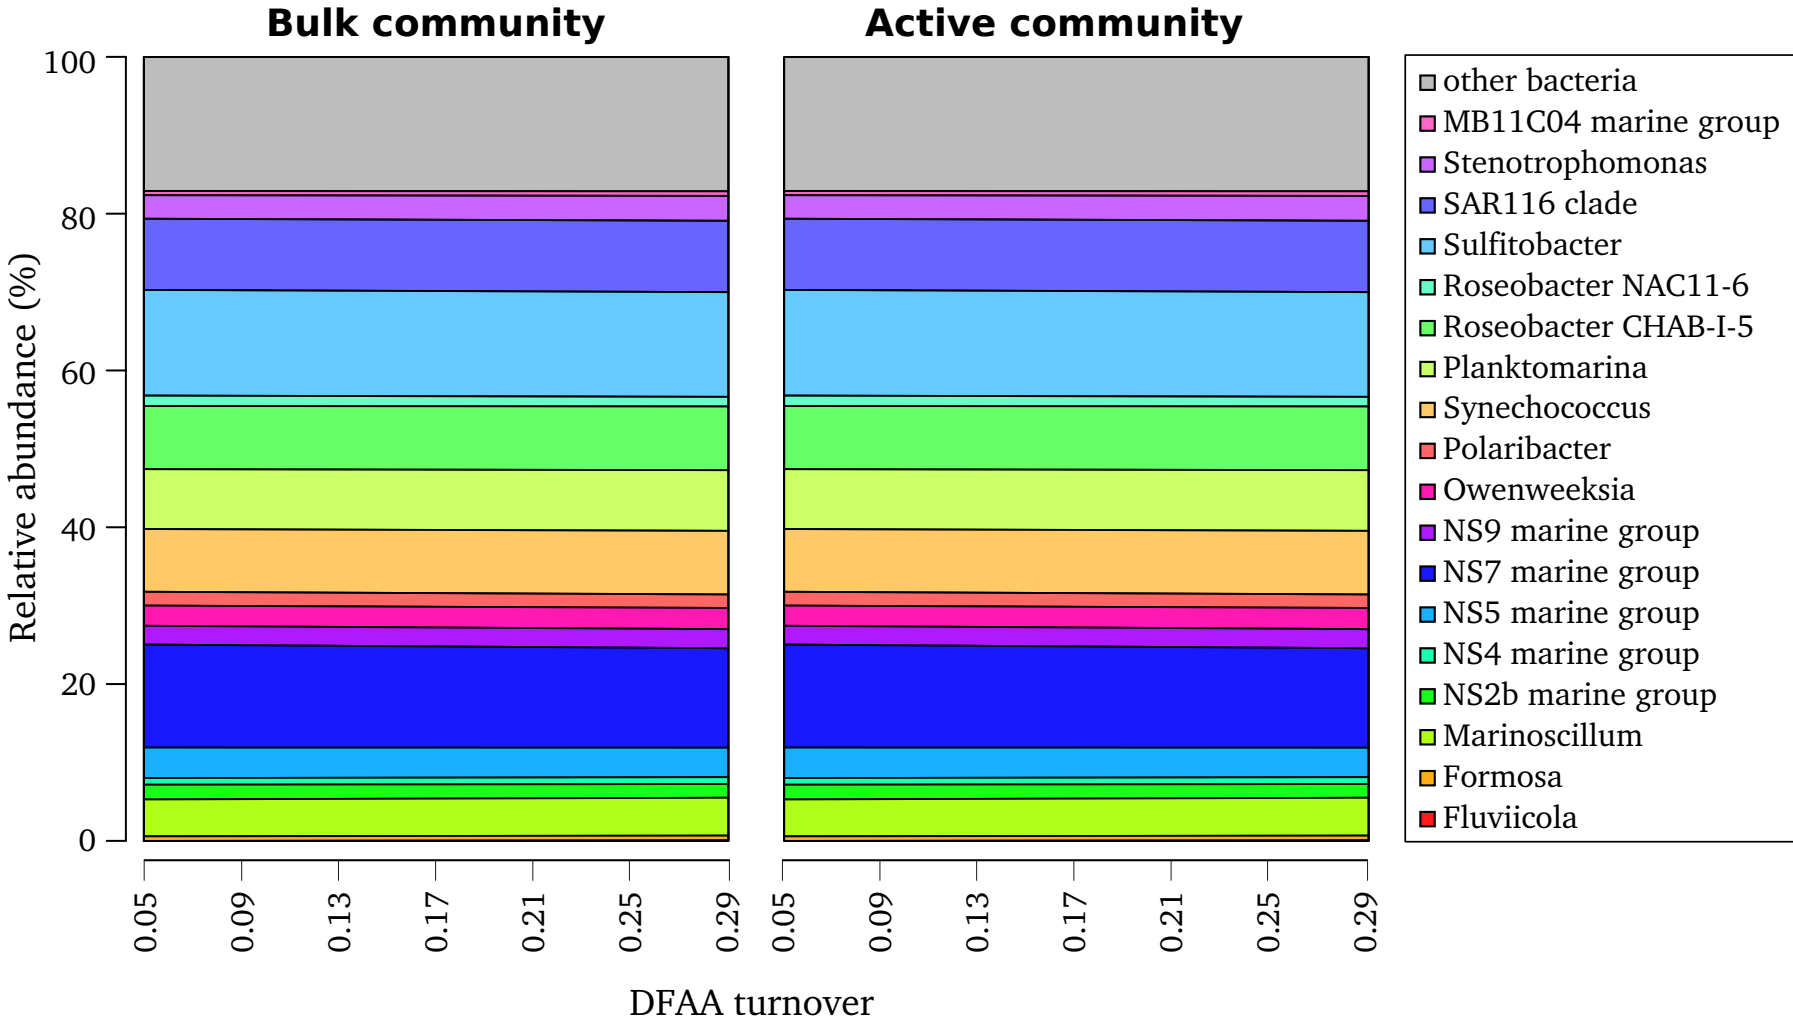

Supplement: s1 [file s1]

# Residuals from multinomial model RNA vs. DFAA turnover

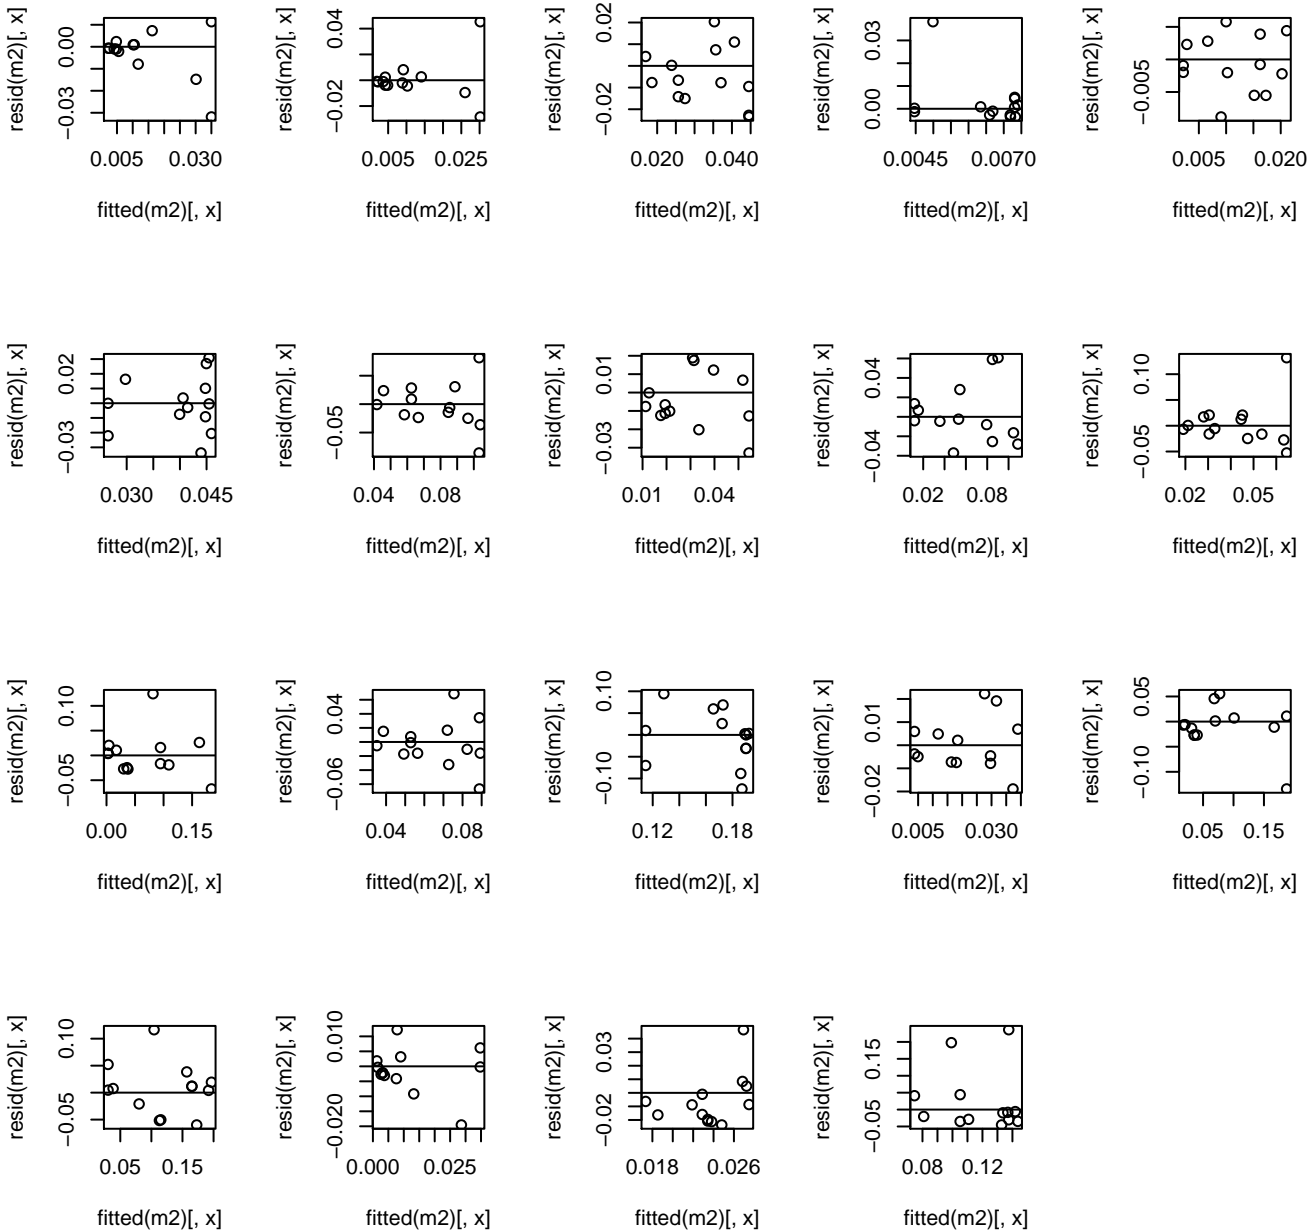

Supplement: s1 [file s1]

**Entire community**

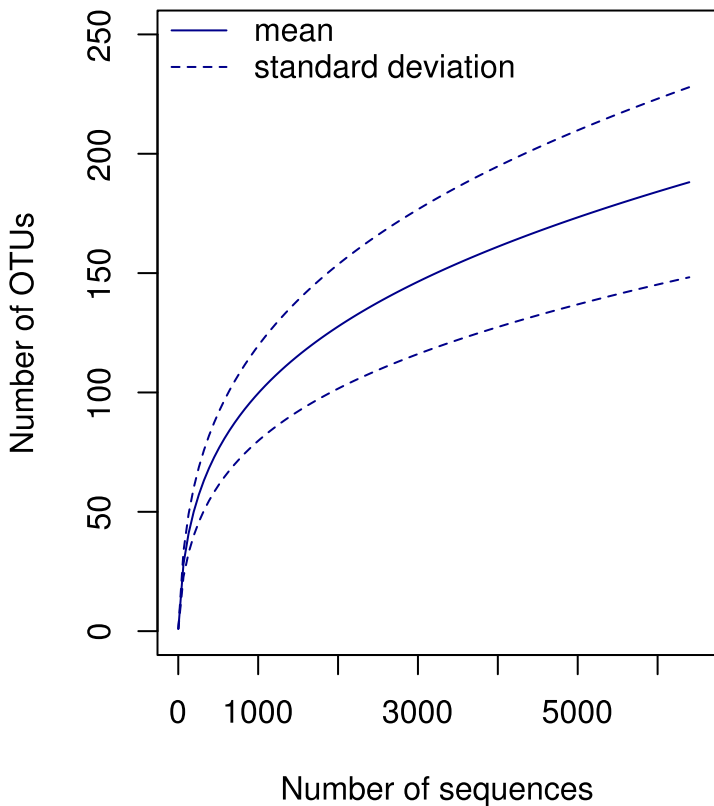

**Active Community**

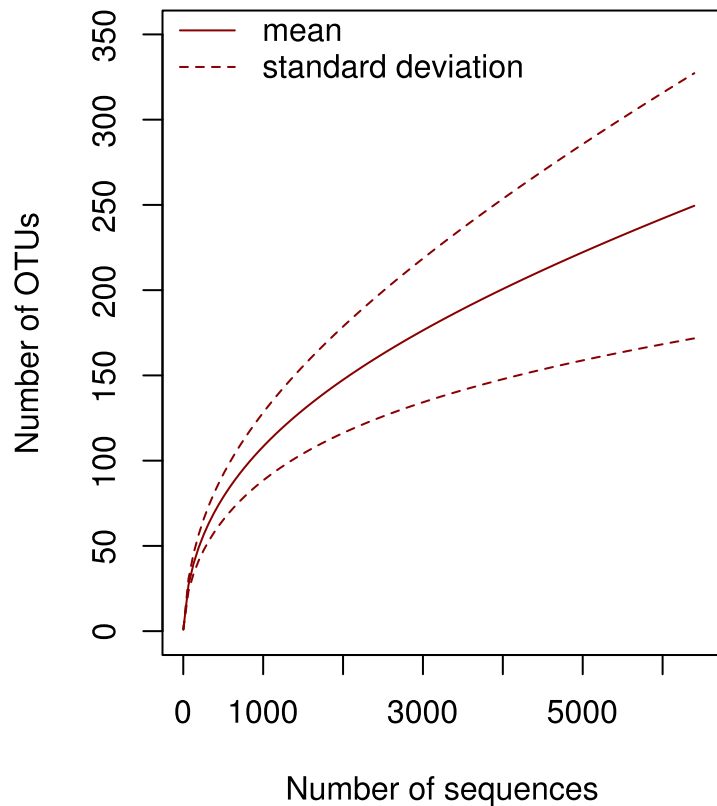

Supplement: s1 [file s1]
